# Supplementary material for: IDEAL-Q, an Automated Tool for Label-free Quantitation Analysis Using an Efficient Peptide Alignment Approach and Spectral Data Validation
Source: PubMed Central journal article supplement — Mol Cell Proteomics. 2009 Sep 13;9(1):131–44. doi: 10.1074/mcp.M900177-MCP200 (PMC2808259; doi:10.1074/mcp.m900177-mcp200), 2009-09-13

## Supplementary Data

The complete list of MS/MS spectrum and the corresponding annotations as well as the quantitation result of all the identified peptides for all the following three experiments are available on the following website:

[http://ms.iis.sinica.edu.tw/IDEAL-Q/Suppl/IDEAL-Q\\_Supplementary.htm](http://ms.iis.sinica.edu.tw/IDEAL-Q/Suppl/IDEAL-Q_Supplementary.htm)

1. Experiment in the subsections “*Substantially increased quantitation coverage on the proteome scale with high quantitation accuracy*” and “*Large-scale manual validation demonstrates the highly reliable quantitation performance of IDEAL-Q*”
2. Experiment in the subsection “*Using IDEAL’s elution time prediction and SCI validation to rectify chromatographic shift*”
3. Experiment in the subsection “*Demonstration of quantitation performance on a large-scale experiment with fractionation*”

Due to the size limit for data upload, for the experiment of *the large-scale experiment with fractionation*, we only report MS/MS spectrum of single-hit proteins in the following page, and all MS/MS spectrum of identified peptides are available at:

[http://ms.iis.sinica.edu.tw/IDEAL-Q/Suppl/IDEAL-Q\\_Supplementary.htm](http://ms.iis.sinica.edu.tw/IDEAL-Q/Suppl/IDEAL-Q_Supplementary.htm)

Protein index=23, ACC No:IPI00009235

Peptide index=4590 MS/MS spectrum

Sequence: QQSEEDLLLQDFSR, m/z:854.4124, charge:+ 2, Modification: , Mod Position:

Score: 91.16, Raw data:WET\_B1\_090616\_02.mzxml, MS/MS Elution time: 63.58883, Scan number:3483, Mass delta:-0.0054, Rank:1

| No | b       | b++    | b*      | b*++   | b0      | b0++   | Seq | y       | y++    | y*      | y*++   | y0      | y0++   | RevNo |
|----|---------|--------|---------|--------|---------|--------|-----|---------|--------|---------|--------|---------|--------|-------|
| 1  | 129.07  | 65.04  | 112.04  | 56.52  |         |        | Q   |         |        |         |        |         |        | 14    |
| 2  | 257.12  | 129.07 | 240.1   | 120.55 |         |        | Q   | 1579.76 | 790.38 | 1562.73 | 781.87 | 1561.75 | 781.38 | 13    |
| 3  | 344.16  | 172.58 | 327.13  | 164.07 | 326.15  | 163.58 | S   | 1451.7  | 726.35 | 1434.67 | 717.84 | 1433.69 | 717.35 | 12    |
| 4  | 473.2   | 237.1  | 456.17  | 228.59 | 455.19  | 228.1  | E   | 1364.67 | 682.84 | 1347.64 | 674.33 | 1346.66 | 673.83 | 11    |
| 5  | 602.24  | 301.62 | 585.22  | 293.11 | 584.23  | 292.62 | E   | 1235.63 | 618.32 | 1218.6  | 609.8  | 1217.62 | 609.31 | 10    |
| 6  | 717.27  | 359.14 | 700.24  | 350.62 | 699.26  | 350.13 | D   | 1106.58 | 553.8  | 1089.56 | 545.28 | 1088.57 | 544.79 | 9     |
| 7  | 830.35  | 415.68 | 813.33  | 407.17 | 812.34  | 406.67 | L   | 991.56  | 496.28 | 974.53  | 487.77 | 973.55  | 487.28 | 8     |
| 8  | 943.44  | 472.22 | 926.41  | 463.71 | 925.43  | 463.22 | L   | 878.47  | 439.74 | 861.45  | 431.23 | 860.46  | 430.73 | 7     |
| 9  | 1056.52 | 528.76 | 1039.49 | 520.25 | 1038.51 | 519.76 | L   | 765.39  | 383.2  | 748.36  | 374.68 | 747.38  | 374.19 | 6     |
| 10 | 1184.58 | 592.79 | 1167.55 | 584.28 | 1166.57 | 583.79 | Q   | 652.3   | 326.66 | 635.28  | 318.14 | 634.29  | 317.65 | 5     |
| 11 | 1299.61 | 650.31 | 1282.58 | 641.79 | 1281.6  | 641.3  | D   | 524.25  | 262.63 | 507.22  | 254.11 | 506.24  | 253.62 | 4     |
| 12 | 1446.67 | 723.84 | 1429.65 | 715.33 | 1428.66 | 714.84 | F   | 409.22  | 205.11 | 392.19  | 196.6  | 391.21  | 196.11 | 3     |
| 13 | 1533.71 | 767.36 | 1516.68 | 758.84 | 1515.7  | 758.35 | S   | 262.15  | 131.58 | 245.12  | 123.07 | 244.14  | 122.57 | 2     |
| 14 |         |        |         |        |         |        | R   | 175.12  | 88.06  | 158.09  | 79.55  |         |        | 1     |

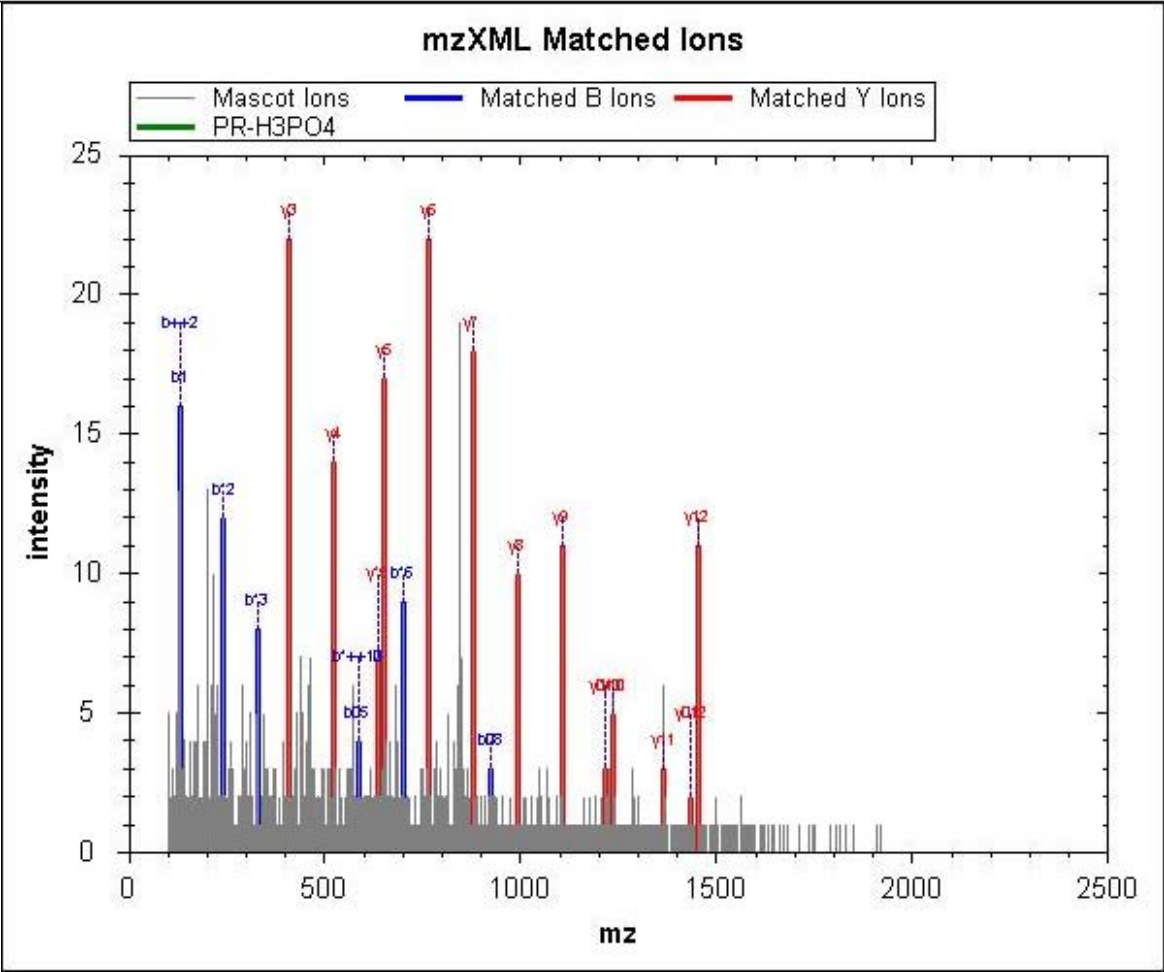

Protein index=26, ACC No:IPI00028491

Peptide index=1916 MS/MS spectrum

Sequence: VLSASQAFAAQR, m/z:624.8319, charge:+ 2, Modification: , Mod Position:

Score: 48.99, Raw data:WET\_A1\_090616\_02.mzxml, MS/MS Elution time: 39.1305, Scan number:2056, Mass delta:-0.0168, Rank:1

| No | b       | b++    | b*      | b*++   | b0      | b0++   | Seq | y       | y++    | y*      | y*++   | y0      | y0++   | RevNo |
|----|---------|--------|---------|--------|---------|--------|-----|---------|--------|---------|--------|---------|--------|-------|
| 1  | 100.08  | 50.54  |         |        |         |        | V   |         |        |         |        |         |        | 12    |
| 2  | 213.16  | 107.08 |         |        |         |        | L   | 1149.6  | 575.3  | 1132.57 | 566.79 | 1131.59 | 566.3  | 11    |
| 3  | 300.19  | 150.6  |         |        | 282.18  | 141.59 | S   | 1036.52 | 518.76 | 1019.49 | 510.25 | 1018.51 | 509.76 | 10    |
| 4  | 371.23  | 186.12 |         |        | 353.22  | 177.11 | A   | 949.48  | 475.25 | 932.46  | 466.73 | 931.47  | 466.24 | 9     |
| 5  | 458.26  | 229.63 |         |        | 440.25  | 220.63 | S   | 878.45  | 439.73 | 861.42  | 431.21 | 860.44  | 430.72 | 8     |
| 6  | 586.32  | 293.66 | 569.29  | 285.15 | 568.31  | 284.66 | Q   | 791.42  | 396.21 | 774.39  | 387.7  |         |        | 7     |
| 7  | 657.36  | 329.18 | 640.33  | 320.67 | 639.35  | 320.18 | A   | 663.36  | 332.18 | 646.33  | 323.67 |         |        | 6     |
| 8  | 804.43  | 402.72 | 787.4   | 394.2  | 786.41  | 393.71 | F   | 592.32  | 296.66 | 575.29  | 288.15 |         |        | 5     |
| 9  | 875.46  | 438.23 | 858.44  | 429.72 | 857.45  | 429.23 | A   | 445.25  | 223.13 | 428.23  | 214.62 |         |        | 4     |
| 10 | 946.5   | 473.75 | 929.47  | 465.24 | 928.49  | 464.75 | A   | 374.21  | 187.61 | 357.19  | 179.1  |         |        | 3     |
| 11 | 1074.56 | 537.78 | 1057.53 | 529.27 | 1056.55 | 528.78 | Q   | 303.18  | 152.09 | 286.15  | 143.58 |         |        | 2     |
| 12 |         |        |         |        |         |        | R   | 175.12  | 88.06  | 158.09  | 79.55  |         |        | 1     |

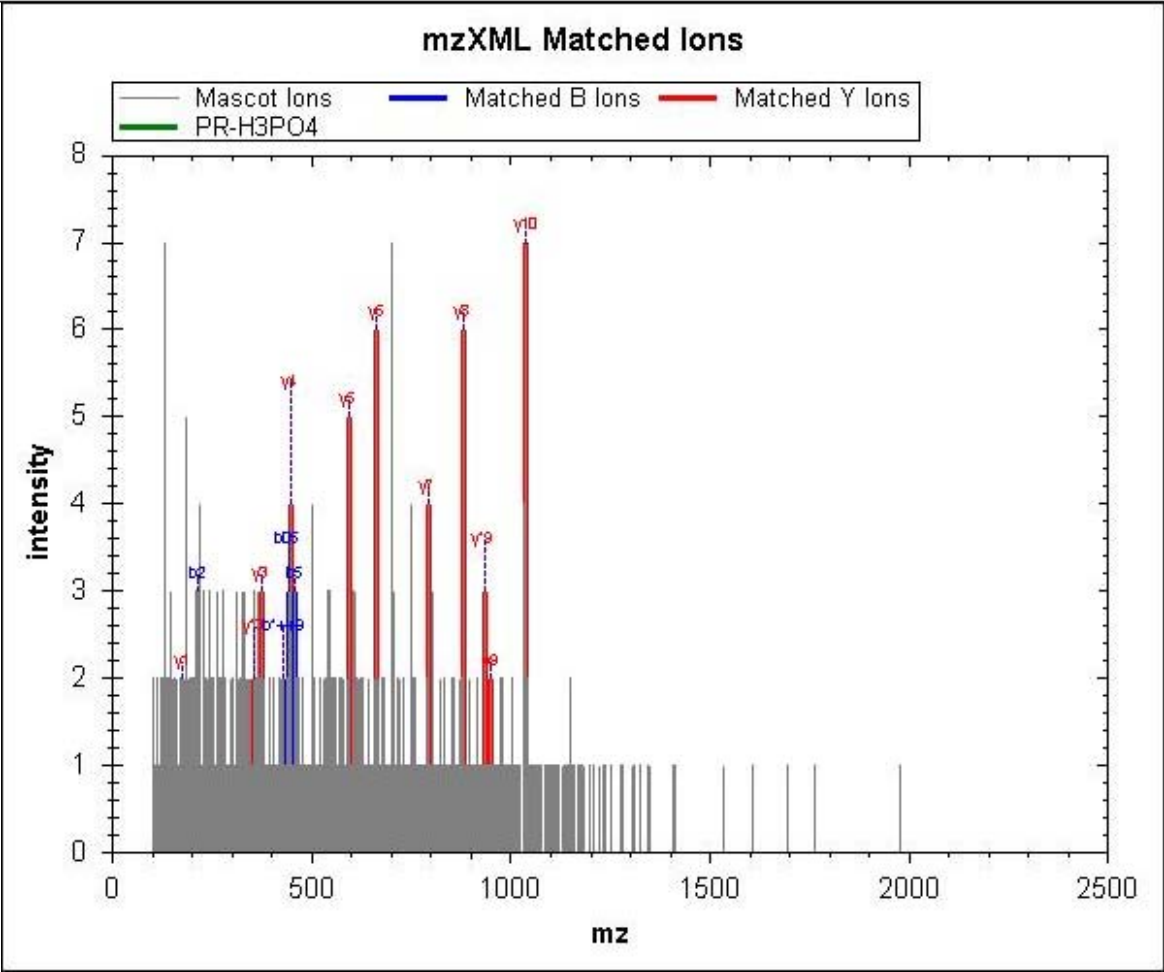

Protein index=40, ACC No:IPI00552036

Peptide index=4196 MS/MS spectrum

Sequence: LITTQQWLIK, m/z:622.3692, charge:+ 2, Modification: , Mod Position:

Score: 70.47, Raw data:WET\_A1\_090616\_01.mzxml, MS/MS Elution time: 60.16017, Scan number:3284, Mass delta:-0.0097, Rank:1

| No | b       | b++    | b*      | b*++   | b0      | b0++   | Seq | y       | y++    | y*      | y*++   | y0      | y0++   | RevNo |
|----|---------|--------|---------|--------|---------|--------|-----|---------|--------|---------|--------|---------|--------|-------|
| 1  | 114.09  | 57.55  |         |        |         |        | L   |         |        |         |        |         |        | 10    |
| 2  | 227.18  | 114.09 |         |        |         |        | I   | 1130.66 | 565.83 | 1113.63 | 557.32 | 1112.65 | 556.83 | 9     |
| 3  | 328.22  | 164.62 |         |        | 310.21  | 155.61 | T   | 1017.57 | 509.29 | 1000.55 | 500.78 | 999.56  | 500.28 | 8     |
| 4  | 429.27  | 215.14 |         |        | 411.26  | 206.13 | T   | 916.53  | 458.77 | 899.5   | 450.25 | 898.51  | 449.76 | 7     |
| 5  | 557.33  | 279.17 | 540.3   | 270.65 | 539.32  | 270.16 | Q   | 815.48  | 408.24 | 798.45  | 399.73 |         |        | 6     |
| 6  | 685.39  | 343.2  | 668.36  | 334.68 | 667.38  | 334.19 | Q   | 687.42  | 344.21 | 670.39  | 335.7  |         |        | 5     |
| 7  | 871.47  | 436.24 | 854.44  | 427.72 | 853.46  | 427.23 | W   | 559.36  | 280.18 | 542.33  | 271.67 |         |        | 4     |
| 8  | 984.55  | 492.78 | 967.52  | 484.27 | 966.54  | 483.77 | L   | 373.28  | 187.14 | 356.25  | 178.63 |         |        | 3     |
| 9  | 1097.64 | 549.32 | 1080.61 | 540.81 | 1079.62 | 540.32 | I   | 260.2   | 130.6  | 243.17  | 122.09 |         |        | 2     |
| 10 |         |        |         |        |         |        | K   | 147.11  | 74.06  | 130.09  | 65.55  |         |        | 1     |

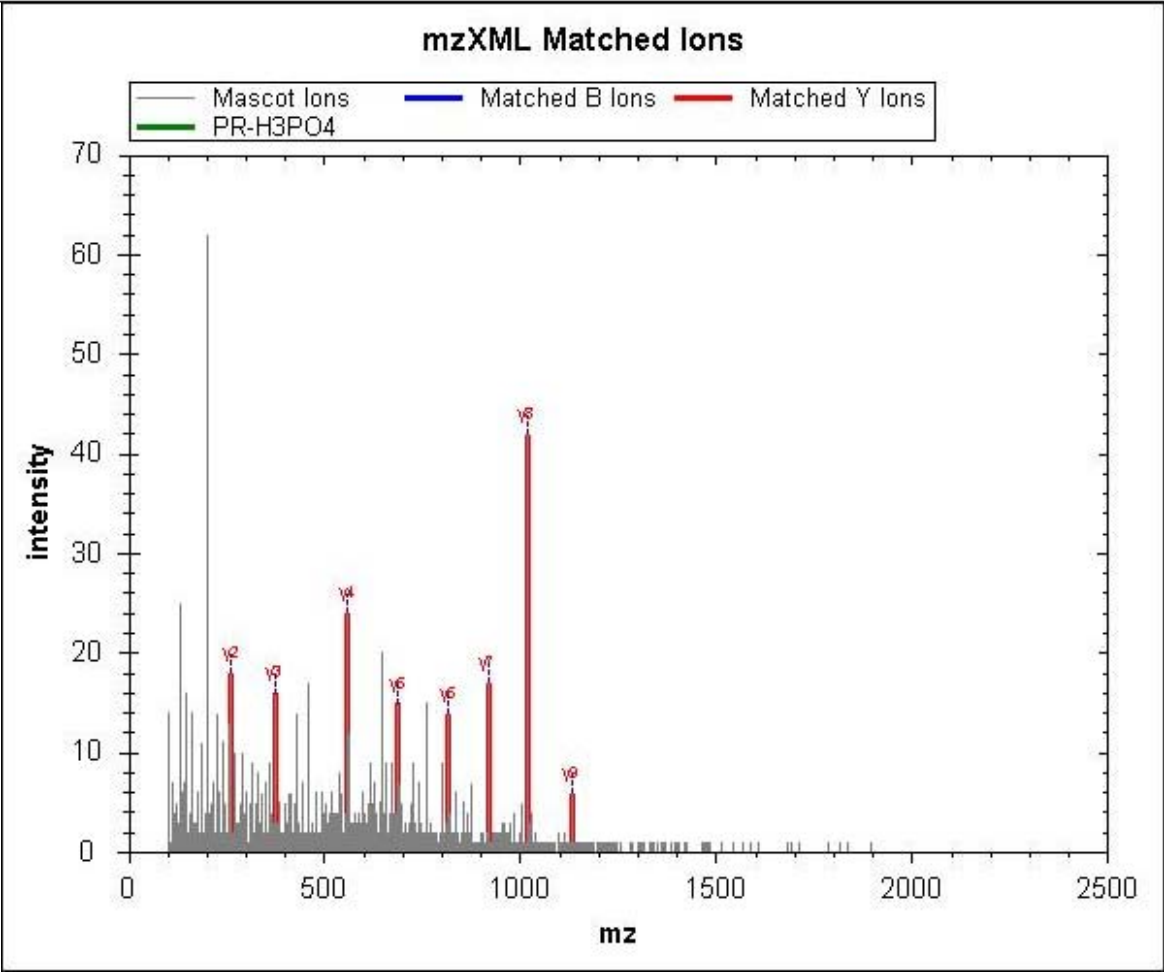

Protein index=76, ACC No:IPI00301100

Peptide index=4829 MS/MS spectrum

Sequence: SFWSYAFSR, m/z:575.7732, charge:+ 2, Modification: , Mod Position:

Score: 40.7, Raw data:WET\_A1\_090616\_01.mzxml, MS/MS Elution time: 66.42634, Scan number:3651, Mass delta:0.0075, Rank:1

| No | b      | b++    | b0     | b0++   | Seq | y      | y++    | y*      | y*++   | y0      | y0++   | RevNo |
|----|--------|--------|--------|--------|-----|--------|--------|---------|--------|---------|--------|-------|
| 1  | 88.04  | 44.52  | 70.03  | 35.52  | S   |        |        |         |        |         |        | 9     |
| 2  | 235.11 | 118.06 | 217.1  | 109.05 | F   | 1063.5 | 532.25 | 1046.47 | 523.74 | 1045.49 | 523.25 | 8     |
| 3  | 421.19 | 211.1  | 403.18 | 202.09 | W   | 916.43 | 458.72 | 899.4   | 450.21 | 898.42  | 449.71 | 7     |
| 4  | 508.22 | 254.61 | 490.21 | 245.61 | S   | 730.35 | 365.68 | 713.33  | 357.17 | 712.34  | 356.67 | 6     |
| 5  | 671.28 | 336.14 | 653.27 | 327.14 | Y   | 643.32 | 322.16 | 626.29  | 313.65 | 625.31  | 313.16 | 5     |
| 6  | 742.32 | 371.66 | 724.31 | 362.66 | A   | 480.26 | 240.63 | 463.23  | 232.12 | 462.25  | 231.63 | 4     |
| 7  | 889.39 | 445.2  | 871.38 | 436.19 | F   | 409.22 | 205.11 | 392.19  | 196.6  | 391.21  | 196.11 | 3     |
| 8  | 976.42 | 488.71 | 958.41 | 479.71 | S   | 262.15 | 131.58 | 245.12  | 123.07 | 244.14  | 122.57 | 2     |
| 9  |        |        |        |        | R   | 175.12 | 88.06  | 158.09  | 79.55  |         |        | 1     |

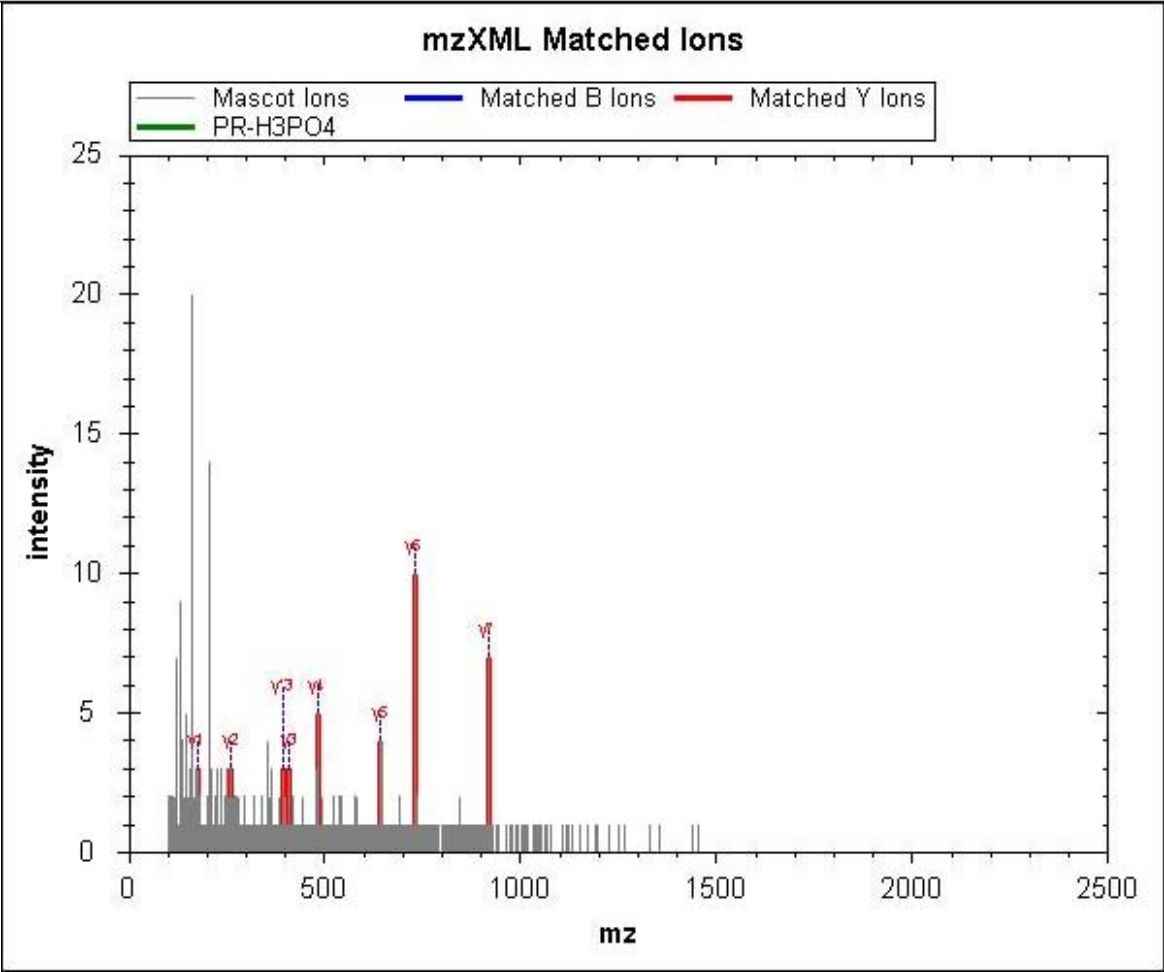

Protein index=77, ACC No:IPI00304612

Peptide index=1633 MS/MS spectrum

Sequence: YQAVTATLEEK, m/z:626.8262, charge:+ 2, Modification: , Mod Position:

Score: 79.96, Raw data:WET\_B5\_090616\_03.mzxml, MS/MS Elution time: 35.741, Scan number:1855, Mass delta:-0.0041, Rank:1

| No | b       | b++    | b*      | b*++   | b0      | b0++   | Seq | y       | y++    | y*      | y*++   | y0      | y0++   | RevNo |
|----|---------|--------|---------|--------|---------|--------|-----|---------|--------|---------|--------|---------|--------|-------|
| 1  | 164.07  | 82.54  |         |        |         |        | Y   |         |        |         |        |         |        | 11    |
| 2  | 292.13  | 146.57 | 275.1   | 138.05 |         |        | Q   | 1089.58 | 545.29 | 1072.55 | 536.78 | 1071.57 | 536.29 | 10    |
| 3  | 363.17  | 182.09 | 346.14  | 173.57 |         |        | A   | 961.52  | 481.26 | 944.49  | 472.75 | 943.51  | 472.26 | 9     |
| 4  | 462.23  | 231.62 | 445.21  | 223.11 |         |        | V   | 890.48  | 445.75 | 873.46  | 437.23 | 872.47  | 436.74 | 8     |
| 5  | 563.28  | 282.14 | 546.26  | 273.63 | 545.27  | 273.14 | T   | 791.41  | 396.21 | 774.39  | 387.7  | 773.4   | 387.21 | 7     |
| 6  | 634.32  | 317.66 | 617.29  | 309.15 | 616.31  | 308.66 | A   | 690.37  | 345.69 | 673.34  | 337.17 | 672.36  | 336.68 | 6     |
| 7  | 735.37  | 368.19 | 718.34  | 359.67 | 717.36  | 359.18 | T   | 619.33  | 310.17 | 602.3   | 301.66 | 601.32  | 301.16 | 5     |
| 8  | 848.45  | 424.73 | 831.42  | 416.22 | 830.44  | 415.72 | L   | 518.28  | 259.64 | 501.26  | 251.13 | 500.27  | 250.64 | 4     |
| 9  | 977.49  | 489.25 | 960.47  | 480.74 | 959.48  | 480.25 | E   | 405.2   | 203.1  | 388.17  | 194.59 | 387.19  | 194.1  | 3     |
| 10 | 1106.54 | 553.77 | 1089.51 | 545.26 | 1088.53 | 544.77 | E   | 276.16  | 138.58 | 259.13  | 130.07 | 258.14  | 129.58 | 2     |
| 11 |         |        |         |        |         |        | K   | 147.11  | 74.06  | 130.09  | 65.55  |         |        | 1     |





|    |         |        |         |        |         |        |   |        |        |        |        |        |        |   |
|----|---------|--------|---------|--------|---------|--------|---|--------|--------|--------|--------|--------|--------|---|
| 13 | 1441.76 | 721.38 | 1424.73 | 712.87 | 1423.75 | 712.38 | A | 601.37 | 301.19 | 584.34 | 292.67 | 583.36 | 292.18 | 5 |
| 14 | 1570.8  | 785.9  | 1553.77 | 777.39 | 1552.79 | 776.9  | E | 530.33 | 265.67 | 513.3  | 257.16 | 512.32 | 256.66 | 4 |
| 15 | 1683.88 | 842.45 | 1666.86 | 833.93 | 1665.87 | 833.44 | L | 401.29 | 201.15 | 384.26 | 192.63 |        |        | 3 |
| 16 | 1796.97 | 898.99 | 1779.94 | 890.47 | 1778.96 | 889.98 | I | 288.2  | 144.61 | 271.18 | 136.09 |        |        | 2 |
| 17 |         |        |         |        |         |        | R | 175.12 | 88.06  | 158.09 | 79.55  |        |        | 1 |

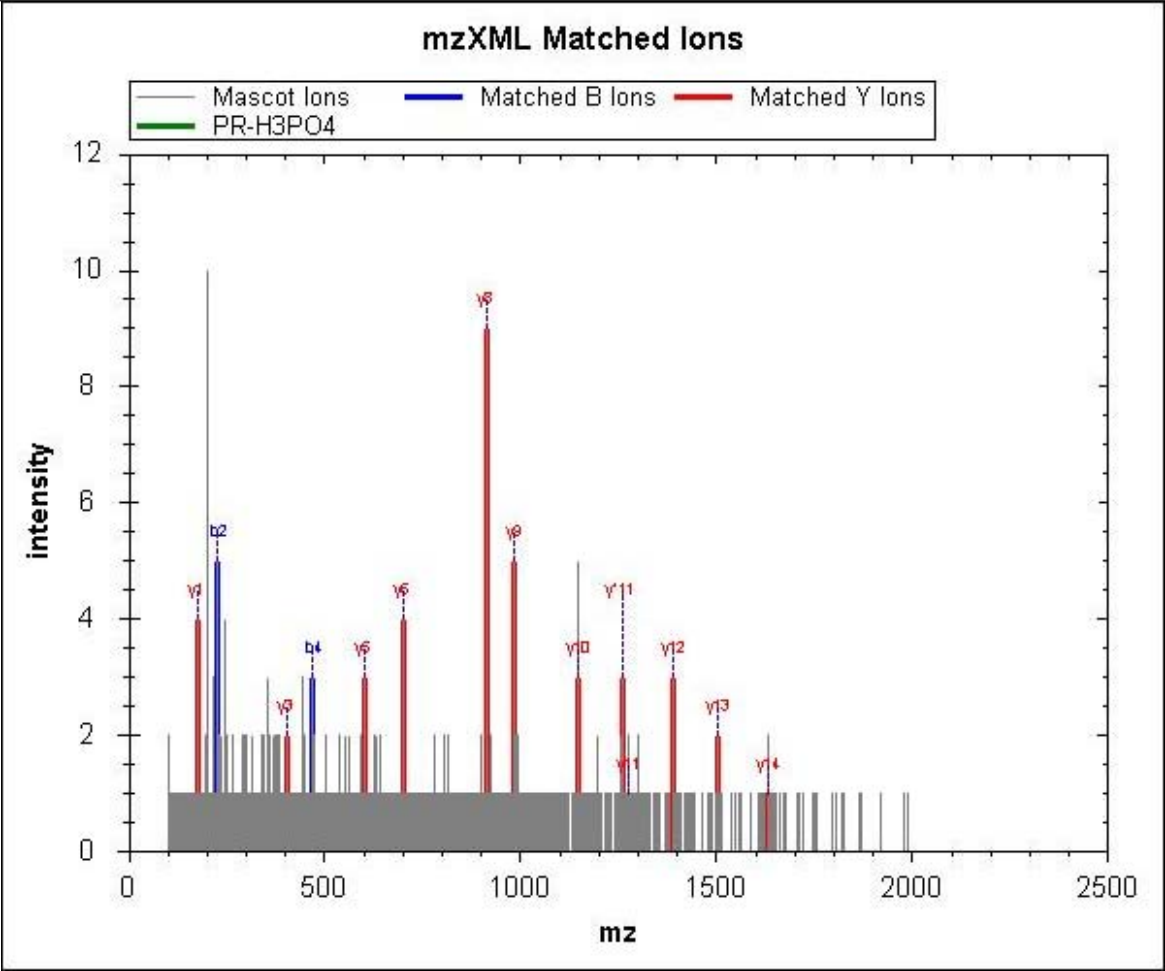

Protein index=115, ACC No:IPI00024266

Peptide index=5767 MS/MS spectrum

Sequence: IASGLGLAWIVGR, m/z:656.8917, charge:+ 2, Modification: , Mod Position:

Score: 94.28, Raw data:WET\_A1\_090616\_01.mzxml, MS/MS Elution time: 78.26317, Scan number:4344, Mass delta:0.0026, Rank:1

| No | b      | b++    | b0     | b0++   | Seq | y       | y++    | y*      | y*++   | y0      | y0++   | RevNo |
|----|--------|--------|--------|--------|-----|---------|--------|---------|--------|---------|--------|-------|
| 1  | 114.09 | 57.55  |        |        | I   |         |        |         |        |         |        | 13    |
| 2  | 185.13 | 93.07  |        |        | A   | 1199.69 | 600.35 | 1182.66 | 591.84 | 1181.68 | 591.34 | 12    |
| 3  | 272.16 | 136.58 | 254.15 | 127.58 | S   | 1128.65 | 564.83 | 1111.63 | 556.32 | 1110.64 | 555.82 | 11    |
| 4  | 329.18 | 165.09 | 311.17 | 156.09 | G   | 1041.62 | 521.31 | 1024.59 | 512.8  |         |        | 10    |
| 5  | 442.27 | 221.64 | 424.26 | 212.63 | L   | 984.6   | 492.8  | 967.57  | 484.29 |         |        | 9     |
| 6  | 499.29 | 250.15 | 481.28 | 241.14 | B   | 871.51  | 436.26 | 854.49  | 427.75 |         |        | 8     |
| 7  | 612.37 | 306.69 | 594.36 | 297.68 | L   | 814.49  | 407.75 | 797.47  | 399.24 |         |        | 7     |



|    |         |        |         |        |   |        |        |        |        |        |        |   |
|----|---------|--------|---------|--------|---|--------|--------|--------|--------|--------|--------|---|
| 7  | 750.45  | 375.73 | 732.44  | 366.72 | H | 781.47 | 391.24 | 764.44 | 382.72 | 763.46 | 382.23 | 7 |
| 8  | 863.53  | 432.27 | 845.52  | 423.27 | L | 644.41 | 322.71 | 627.38 | 314.19 | 626.4  | 313.7  | 6 |
| 9  | 976.62  | 488.81 | 958.61  | 479.81 | I | 531.32 | 266.17 | 514.3  | 257.65 | 513.31 | 257.16 | 5 |
| 10 | 1077.67 | 539.34 | 1059.66 | 530.33 | T | 418.24 | 209.62 | 401.21 | 201.11 | 400.23 | 200.62 | 4 |
| 11 | 1148.7  | 574.86 | 1130.69 | 565.85 | A | 317.19 | 159.1  | 300.17 | 150.59 |        |        | 3 |
| 12 | 1219.74 | 610.37 | 1201.73 | 601.37 | A | 246.16 | 123.58 | 229.13 | 115.07 |        |        | 2 |
| 13 |         |        |         |        | R | 175.12 | 88.06  | 158.09 | 79.55  |        |        | 1 |

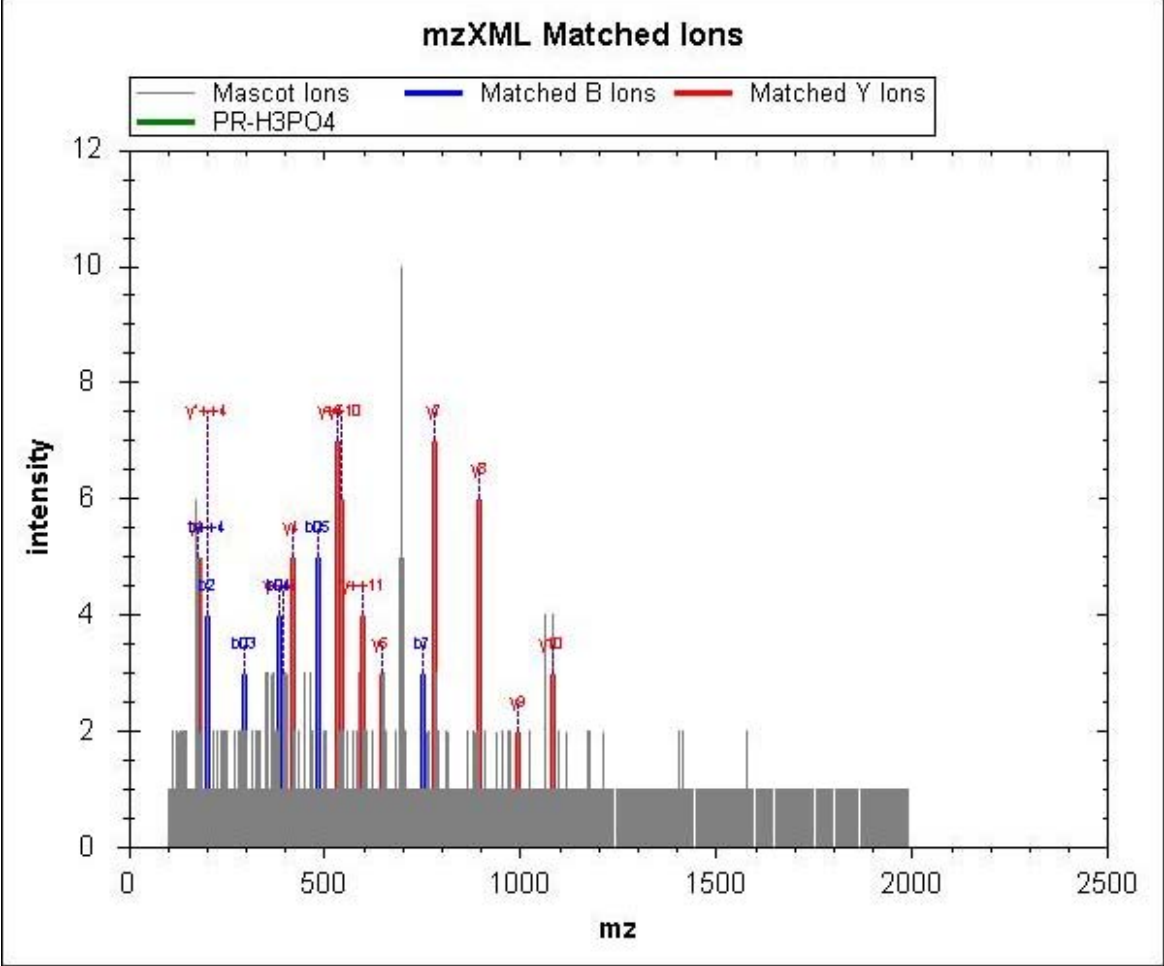

Protein index=141, ACC No:IPI00002902

Peptide index=4982 MS/MS spectrum

Sequence: LIGVYTDFAFR, m/z:651.3487, charge:+ 2, Modification: , Mod Position:

Score: 83.4, Raw data:WET\_B1\_090616\_03.mzxml, MS/MS Elution time: 67.355, Scan number:3704, Mass delta:-0.0016, Rank:1

| No | b      | b++    | b0 | b0++ | Seq | y       | y++    | y*      | y*++   | y0      | y0++   | RevNo |
|----|--------|--------|----|------|-----|---------|--------|---------|--------|---------|--------|-------|
| 1  | 114.09 | 57.55  |    |      | L   |         |        |         |        |         |        | 11    |
| 2  | 227.18 | 114.09 |    |      | I   | 1188.6  | 594.81 | 1171.58 | 586.29 | 1170.59 | 585.8  | 10    |
| 3  | 284.2  | 142.6  |    |      | G   | 1075.52 | 538.26 | 1058.49 | 529.75 | 1057.51 | 529.26 | 9     |
| 4  | 383.27 | 192.14 |    |      | V   | 1018.5  | 509.75 | 1001.47 | 501.24 | 1000.49 | 500.75 | 8     |
| 5  | 546.33 | 273.67 |    |      | Y   | 919.43  | 460.22 | 902.4   | 451.71 | 901.42  | 451.21 | 7     |

|    |         |        |         |        |   |        |        |        |        |        |        |   |
|----|---------|--------|---------|--------|---|--------|--------|--------|--------|--------|--------|---|
| 6  | 647.38  | 324.19 | 629.37  | 315.19 | T | 756.37 | 378.69 | 739.34 | 370.17 | 738.36 | 369.68 | 6 |
| 7  | 762.4   | 381.71 | 744.39  | 372.7  | D | 655.32 | 328.16 | 638.29 | 319.65 | 637.31 | 319.16 | 5 |
| 8  | 909.47  | 455.24 | 891.46  | 446.23 | F | 540.29 | 270.65 | 523.27 | 262.14 |        |        | 4 |
| 9  | 980.51  | 490.76 | 962.5   | 481.75 | A | 393.22 | 197.12 | 376.2  | 188.6  |        |        | 3 |
| 10 | 1127.58 | 564.29 | 1109.57 | 555.29 | F | 322.19 | 161.6  | 305.16 | 153.08 |        |        | 2 |
| 11 |         |        |         |        | R | 175.12 | 88.06  | 158.09 | 79.55  |        |        | 1 |

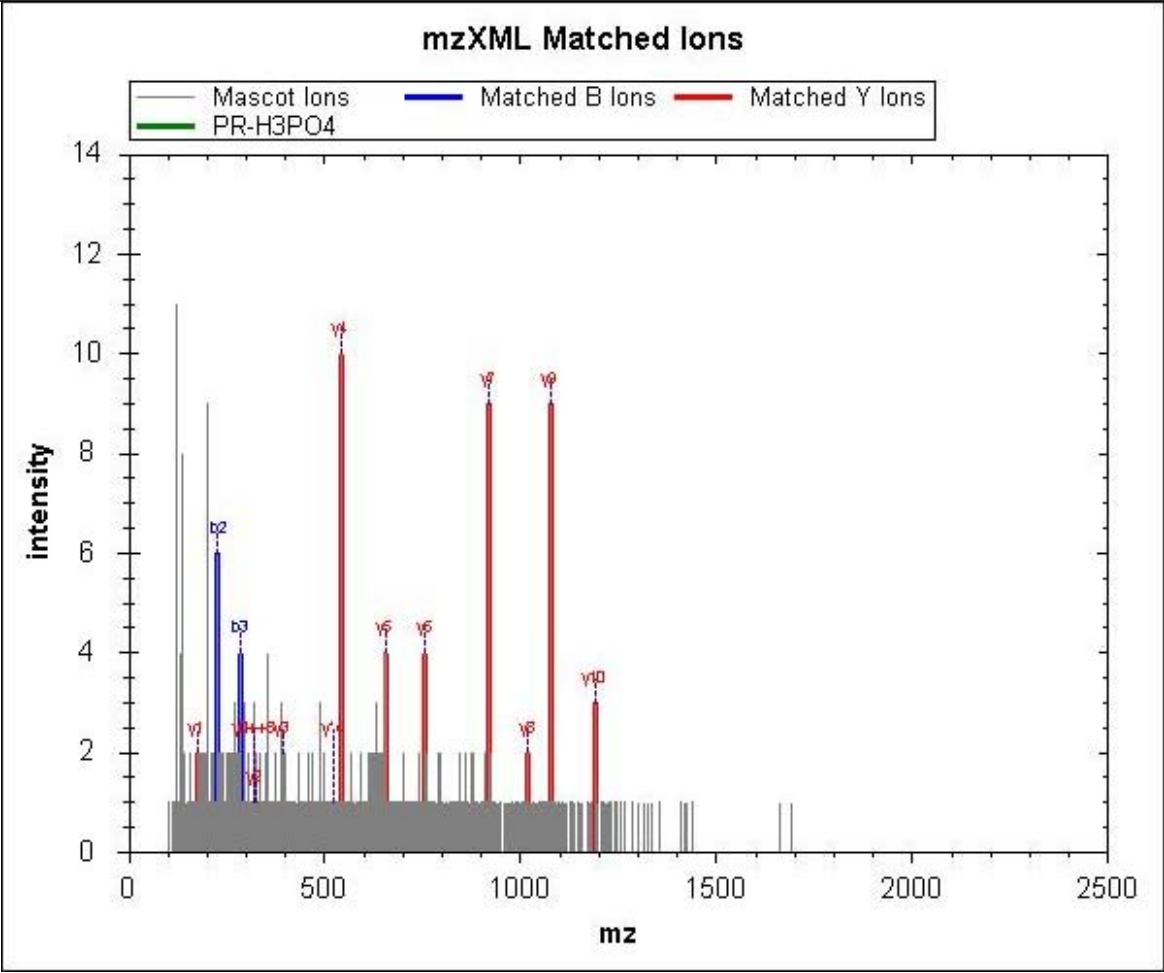

Protein index=146, ACC No:IPI00014440

Peptide index=6036 MS/MS spectrum

Sequence: LSSLDVFIIGAVAK, m/z:716.9246, charge:+ 2, Modification: , Mod Position:

Score: 85.32, Raw data:WET\_A1\_090616\_02.mzxml, MS/MS Elution time: 81.72466, Scan number:4550, Mass delta:-0.0042, Rank:1

| No | b      | b++    | b0     | b0++   | Seq | y       | y++    | y*      | y*++   | y0      | y0++   | RevNo |
|----|--------|--------|--------|--------|-----|---------|--------|---------|--------|---------|--------|-------|
| 1  | 114.09 | 57.55  |        |        | L   |         |        |         |        |         |        | 14    |
| 2  | 201.12 | 101.07 | 183.11 | 92.06  | S   | 1319.76 | 660.38 | 1302.73 | 651.87 | 1301.75 | 651.38 | 13    |
| 3  | 288.16 | 144.58 | 270.14 | 135.58 | S   | 1232.72 | 616.87 | 1215.7  | 608.35 | 1214.71 | 607.86 | 12    |
| 4  | 401.24 | 201.12 | 383.23 | 192.12 | L   | 1145.69 | 573.35 | 1128.67 | 564.84 | 1127.68 | 564.34 | 11    |
| 5  | 516.27 | 258.64 | 498.26 | 249.63 | D   | 1032.61 | 516.81 | 1015.58 | 508.29 | 1014.6  | 507.8  | 10    |
| 6  | 615.33 | 308.17 | 597.32 | 299.17 | V   | 917.58  | 459.29 | 900.56  | 450.78 |         |        | 9     |



|    |         |        |         |        |   |        |        |        |        |        |        |   |
|----|---------|--------|---------|--------|---|--------|--------|--------|--------|--------|--------|---|
| 5  | 602.35  | 301.68 | 584.34  | 292.68 | L | 864.48 | 432.74 | 847.46 | 424.23 | 846.47 | 423.74 | 8 |
| 6  | 689.39  | 345.2  | 671.38  | 336.19 | S | 751.4  | 376.2  | 734.37 | 367.69 | 733.39 | 367.2  | 7 |
| 7  | 760.42  | 380.72 | 742.41  | 371.71 | A | 664.37 | 332.69 | 647.34 | 324.17 | 646.36 | 323.68 | 6 |
| 8  | 873.51  | 437.26 | 855.5   | 428.25 | L | 593.33 | 297.17 | 576.3  | 288.65 | 575.32 | 288.16 | 5 |
| 9  | 1002.55 | 501.78 | 984.54  | 492.77 | E | 480.25 | 240.63 | 463.22 | 232.11 | 462.23 | 231.62 | 4 |
| 10 | 1059.57 | 530.29 | 1041.56 | 521.28 | G | 351.2  | 176.1  | 334.18 | 167.59 |        |        | 3 |
| 11 | 1206.64 | 603.82 | 1188.63 | 594.82 | F | 294.18 | 147.59 | 277.15 | 139.08 |        |        | 2 |
| 12 |         |        |         |        | K | 147.11 | 74.06  | 130.09 | 65.55  |        |        | 1 |

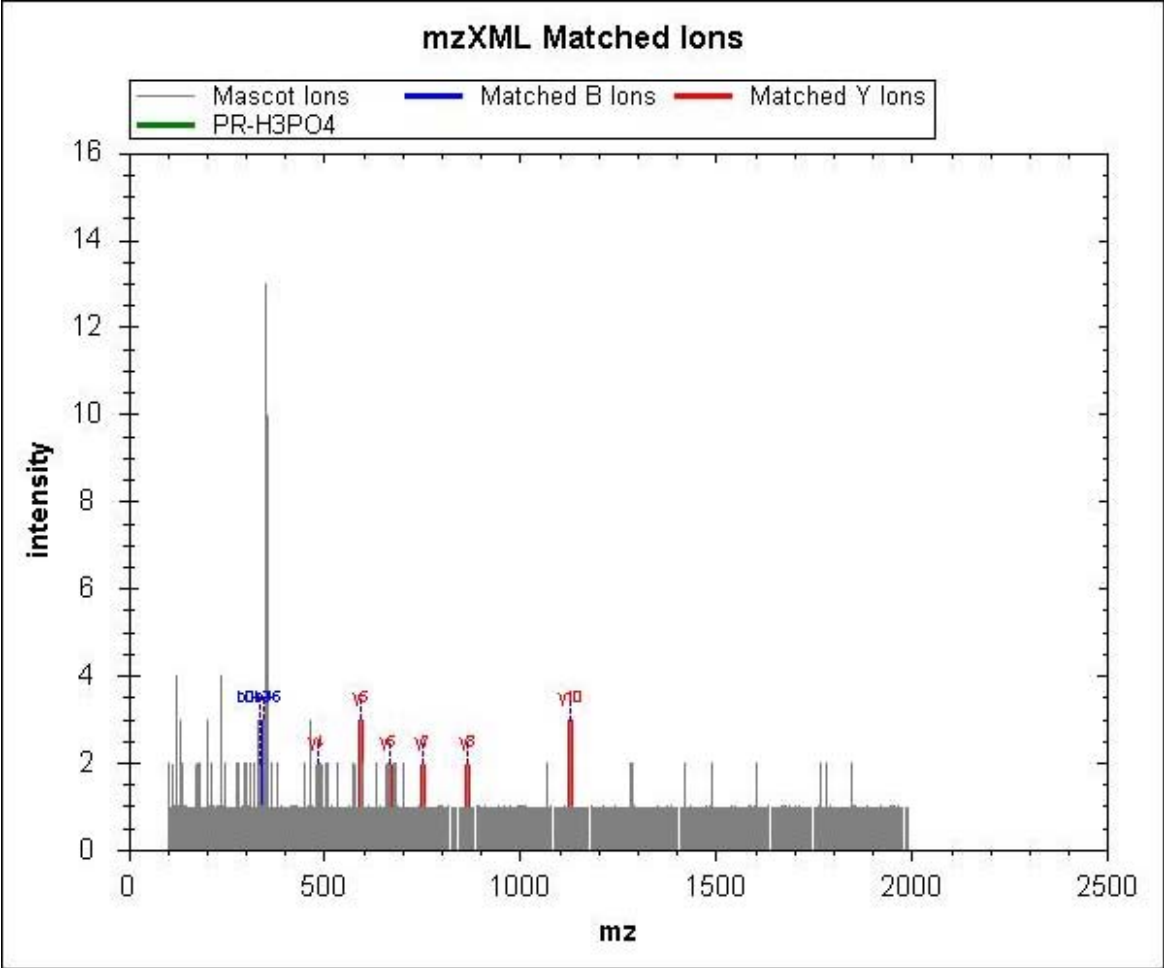

Protein index=151, ACC No:IPI00029266

Peptide index=5261 MS/MS spectrum

Sequence: VMVQPINLIFR, m/z:673.387, charge:+ 2, Modification: Oxidation (M), Mod Position: 0.01000000000.0

Score: 53.87, Raw data:WET\_A1\_090616\_02.mzxml, MS/MS Elution time: 71.88717, Scan number:3974, Mass delta:0.0041, Rank:1

| No | b      | b++    | b* | b*++ | Seq | y       | y++    | y*      | y*++   | RevNo |
|----|--------|--------|----|------|-----|---------|--------|---------|--------|-------|
| 1  | 100.08 | 50.54  |    |      | V   |         |        |         |        | 11    |
| 2  | 183.11 | 92.06  |    |      | M   | 1182.7  | 591.85 | 1165.67 | 583.34 | 10    |
| 3  | 282.18 | 141.59 |    |      | V   | 1099.66 | 550.33 | 1082.64 | 541.82 | 9     |

|    |         |        |         |        |   |         |        |        |        |   |
|----|---------|--------|---------|--------|---|---------|--------|--------|--------|---|
| 4  | 410.24  | 205.62 | 393.21  | 197.11 | Q | 1000.59 | 500.8  | 983.57 | 492.29 | 8 |
| 5  | 507.29  | 254.15 | 490.27  | 245.64 | P | 872.54  | 436.77 | 855.51 | 428.26 | 7 |
| 6  | 620.38  | 310.69 | 603.35  | 302.18 | I | 775.48  | 388.24 | 758.46 | 379.73 | 6 |
| 7  | 734.42  | 367.71 | 717.39  | 359.2  | N | 662.4   | 331.7  | 645.37 | 323.19 | 5 |
| 8  | 847.5   | 424.26 | 830.48  | 415.74 | L | 548.36  | 274.68 | 531.33 | 266.17 | 4 |
| 9  | 960.59  | 480.8  | 943.56  | 472.28 | I | 435.27  | 218.14 | 418.24 | 209.63 | 3 |
| 10 | 1107.66 | 554.33 | 1090.63 | 545.82 | F | 322.19  | 161.6  | 305.16 | 153.08 | 2 |
| 11 |         |        |         |        | R | 175.12  | 88.06  | 158.09 | 79.55  | 1 |

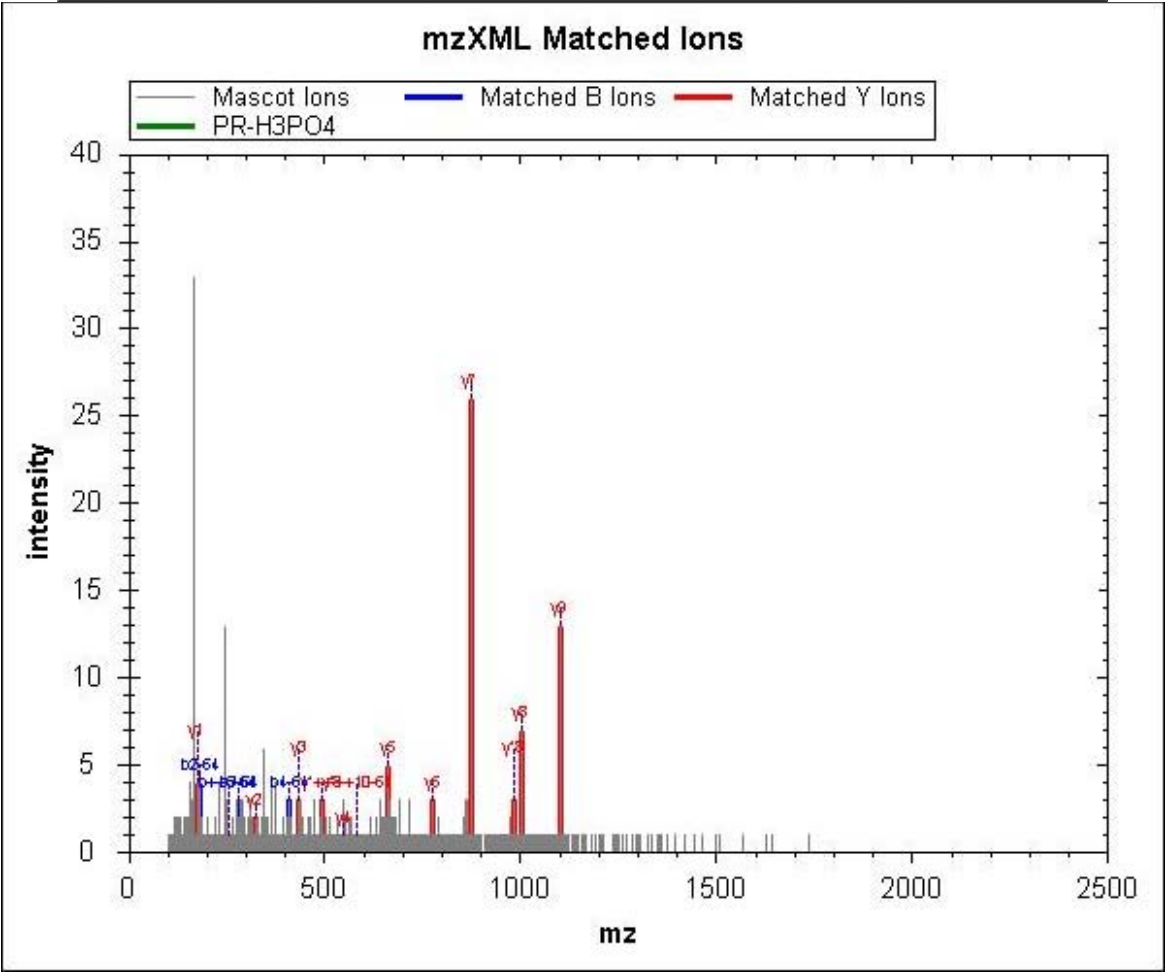

Protein index=156, ACC No:IPI00009346

Peptide index=7079 MS/MS spectrum

Sequence: AGSVPSLAAGLLFGSLAGLGAYQLSQDPR, m/z:939.506, charge:+ 3, Modification: , Mod Position:

Score: 65.99, Raw data:WET\_B1\_090616\_02.mzxml, MS/MS Elution time: 105.6675, Scan number:5970, Mass delta:0.015, Rank:1

| No | b      | b++    | b* | b*++ | b0     | b0++  | Seq | y       | y++     | y*      | y*++    | y0      | y0++    | RevNo |
|----|--------|--------|----|------|--------|-------|-----|---------|---------|---------|---------|---------|---------|-------|
| 1  | 72.04  | 36.53  |    |      |        |       | A   |         |         |         |         |         |         | 29    |
| 2  | 129.07 | 65.04  |    |      |        |       | G   | 2745.46 | 1373.23 | 2728.43 | 1364.72 | 2727.45 | 1364.23 | 28    |
| 3  | 216.1  | 108.55 |    |      | 198.09 | 99.55 | S   | 2688.44 | 1344.72 | 2671.41 | 1336.21 | 2670.43 | 1335.72 | 27    |

|    |         |         |         |         |         |         |   |         |         |         |         |         |         |    |
|----|---------|---------|---------|---------|---------|---------|---|---------|---------|---------|---------|---------|---------|----|
| 4  | 315.17  | 158.09  |         |         | 297.16  | 149.08  | V | 2601.4  | 1301.21 | 2584.38 | 1292.69 | 2583.39 | 1292.2  | 26 |
| 5  | 412.22  | 206.61  |         |         | 394.21  | 197.61  | P | 2502.34 | 1251.67 | 2485.31 | 1243.16 | 2484.32 | 1242.67 | 25 |
| 6  | 499.25  | 250.13  |         |         | 481.24  | 241.12  | S | 2405.28 | 1203.14 | 2388.26 | 1194.63 | 2387.27 | 1194.14 | 24 |
| 7  | 612.34  | 306.67  |         |         | 594.32  | 297.67  | L | 2318.25 | 1159.63 | 2301.22 | 1151.12 | 2300.24 | 1150.62 | 23 |
| 8  | 683.37  | 342.19  |         |         | 665.36  | 333.18  | A | 2205.17 | 1103.09 | 2188.14 | 1094.57 | 2187.16 | 1094.08 | 22 |
| 9  | 754.41  | 377.71  |         |         | 736.4   | 368.7   | A | 2134.13 | 1067.57 | 2117.1  | 1059.06 | 2116.12 | 1058.56 | 21 |
| 10 | 811.43  | 406.22  |         |         | 793.42  | 397.21  | G | 2063.09 | 1032.05 | 2046.07 | 1023.54 | 2045.08 | 1023.04 | 20 |
| 11 | 924.51  | 462.76  |         |         | 906.5   | 453.76  | L | 2006.07 | 1003.54 | 1989.04 | 995.03  | 1988.06 | 994.53  | 19 |
| 12 | 1037.6  | 519.3   |         |         | 1019.59 | 510.3   | L | 1892.99 | 947     | 1875.96 | 938.48  | 1874.98 | 937.99  | 18 |
| 13 | 1184.67 | 592.84  |         |         | 1166.66 | 583.83  | F | 1779.9  | 890.45  | 1762.88 | 881.94  | 1761.89 | 881.45  | 17 |
| 14 | 1241.69 | 621.35  |         |         | 1223.68 | 612.34  | G | 1632.83 | 816.92  | 1615.81 | 808.41  | 1614.82 | 807.92  | 16 |
| 15 | 1328.72 | 664.86  |         |         | 1310.71 | 655.86  | S | 1575.81 | 788.41  | 1558.79 | 779.9   | 1557.8  | 779.4   | 15 |
| 16 | 1441.81 | 721.41  |         |         | 1423.79 | 712.4   | L | 1488.78 | 744.89  | 1471.75 | 736.38  | 1470.77 | 735.89  | 14 |
| 17 | 1512.84 | 756.92  |         |         | 1494.83 | 747.92  | A | 1375.7  | 688.35  | 1358.67 | 679.84  | 1357.69 | 679.35  | 13 |
| 18 | 1569.86 | 785.44  |         |         | 1551.85 | 776.43  | G | 1304.66 | 652.83  | 1287.63 | 644.32  | 1286.65 | 643.83  | 12 |
| 19 | 1682.95 | 841.98  |         |         | 1664.94 | 832.97  | L | 1247.64 | 624.32  | 1230.61 | 615.81  | 1229.63 | 615.32  | 11 |
| 20 | 1739.97 | 870.49  |         |         | 1721.96 | 861.48  | G | 1134.55 | 567.78  | 1117.53 | 559.27  | 1116.54 | 558.78  | 10 |
| 21 | 1811.01 | 906.01  |         |         | 1793    | 897     | A | 1077.53 | 539.27  | 1060.51 | 530.76  | 1059.52 | 530.26  | 9  |
| 22 | 1974.07 | 987.54  |         |         | 1956.06 | 978.53  | Y | 1006.5  | 503.75  | 989.47  | 495.24  | 988.48  | 494.75  | 8  |
| 23 | 2102.13 | 1051.57 | 2085.1  | 1043.05 | 2084.12 | 1042.56 | Q | 843.43  | 422.22  | 826.41  | 413.71  | 825.42  | 413.21  | 7  |
| 24 | 2215.21 | 1108.11 | 2198.19 | 1099.6  | 2197.2  | 1099.1  | L | 715.37  | 358.19  | 698.35  | 349.68  | 697.36  | 349.18  | 6  |
| 25 | 2302.24 | 1151.63 | 2285.22 | 1143.11 | 2284.23 | 1142.62 | S | 602.29  | 301.65  | 585.26  | 293.13  | 584.28  | 292.64  | 5  |
| 26 | 2430.3  | 1215.66 | 2413.28 | 1207.14 | 2412.29 | 1206.65 | Q | 515.26  | 258.13  | 498.23  | 249.62  | 497.25  | 249.13  | 4  |
| 27 | 2545.33 | 1273.17 | 2528.3  | 1264.66 | 2527.32 | 1264.16 | D | 387.2   | 194.1   | 370.17  | 185.59  | 369.19  | 185.1   | 3  |
| 28 | 2642.38 | 1321.69 | 2625.36 | 1313.18 | 2624.37 | 1312.69 | P | 272.17  | 136.59  | 255.15  | 128.08  |         |         | 2  |
| 29 |         |         |         |         |         |         | R | 175.12  | 88.06   | 158.09  | 79.55   |         |         | 1  |

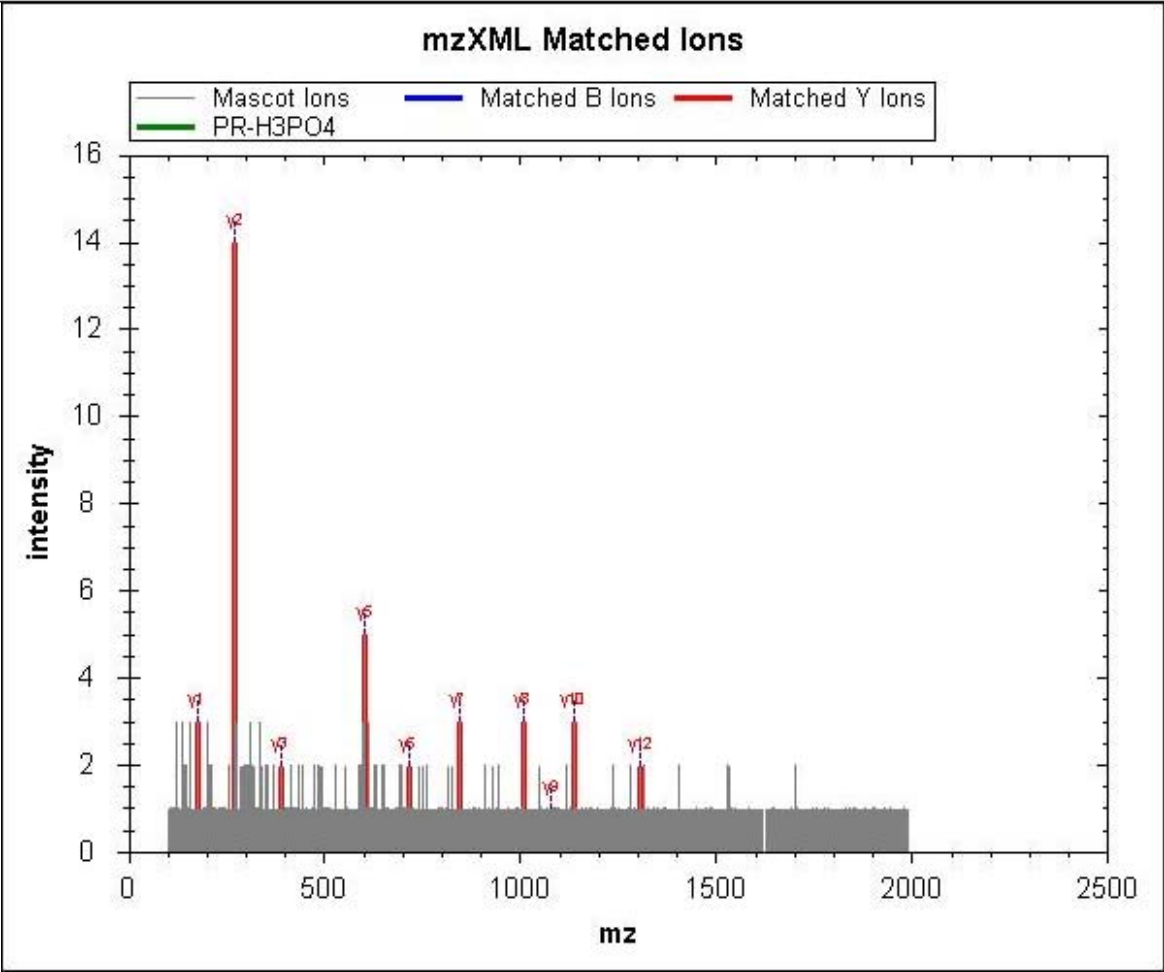

Protein index=157, ACC No:IPI00009507

Peptide index=4030 MS/MS spectrum

Sequence: TVTATFGYPFR, m/z:630.3247, charge:+ 2, Modification: , Mod Position:

Score: 68.43, Raw data:WET\_B4\_090616\_03.mzxml, MS/MS Elution time: 58.21333, Scan number:3170, Mass delta:0.0017, Rank:1

| No | b       | b++    | b0      | b0++   | Seq | y       | y++    | y*      | y*++   | y0      | y0++   | RevNo |
|----|---------|--------|---------|--------|-----|---------|--------|---------|--------|---------|--------|-------|
| 1  | 102.05  | 51.53  | 84.04   | 42.53  | T   |         |        |         |        |         |        | 11    |
| 2  | 201.12  | 101.07 | 183.11  | 92.06  | V   | 1158.59 | 579.8  | 1141.57 | 571.29 | 1140.58 | 570.8  | 10    |
| 3  | 302.17  | 151.59 | 284.16  | 142.58 | T   | 1059.53 | 530.27 | 1042.5  | 521.75 | 1041.52 | 521.26 | 9     |
| 4  | 373.21  | 187.11 | 355.2   | 178.1  | A   | 958.48  | 479.74 | 941.45  | 471.23 | 940.47  | 470.74 | 8     |
| 5  | 474.26  | 237.63 | 456.25  | 228.63 | T   | 887.44  | 444.22 | 870.41  | 435.71 | 869.43  | 435.22 | 7     |
| 6  | 621.32  | 311.17 | 603.31  | 302.16 | F   | 786.39  | 393.7  | 769.37  | 385.19 |         |        | 6     |
| 7  | 678.35  | 339.68 | 660.34  | 330.67 | G   | 639.32  | 320.17 | 622.3   | 311.65 |         |        | 5     |
| 8  | 841.41  | 421.21 | 823.4   | 412.2  | Y   | 582.3   | 291.66 | 565.28  | 283.14 |         |        | 4     |
| 9  | 938.46  | 469.73 | 920.45  | 460.73 | P   | 419.24  | 210.12 | 402.21  | 201.61 |         |        | 3     |
| 10 | 1085.53 | 543.27 | 1067.52 | 534.26 | F   | 322.19  | 161.6  | 305.16  | 153.08 |         |        | 2     |
| 11 |         |        |         |        | R   | 175.12  | 88.06  | 158.09  | 79.55  |         |        | 1     |

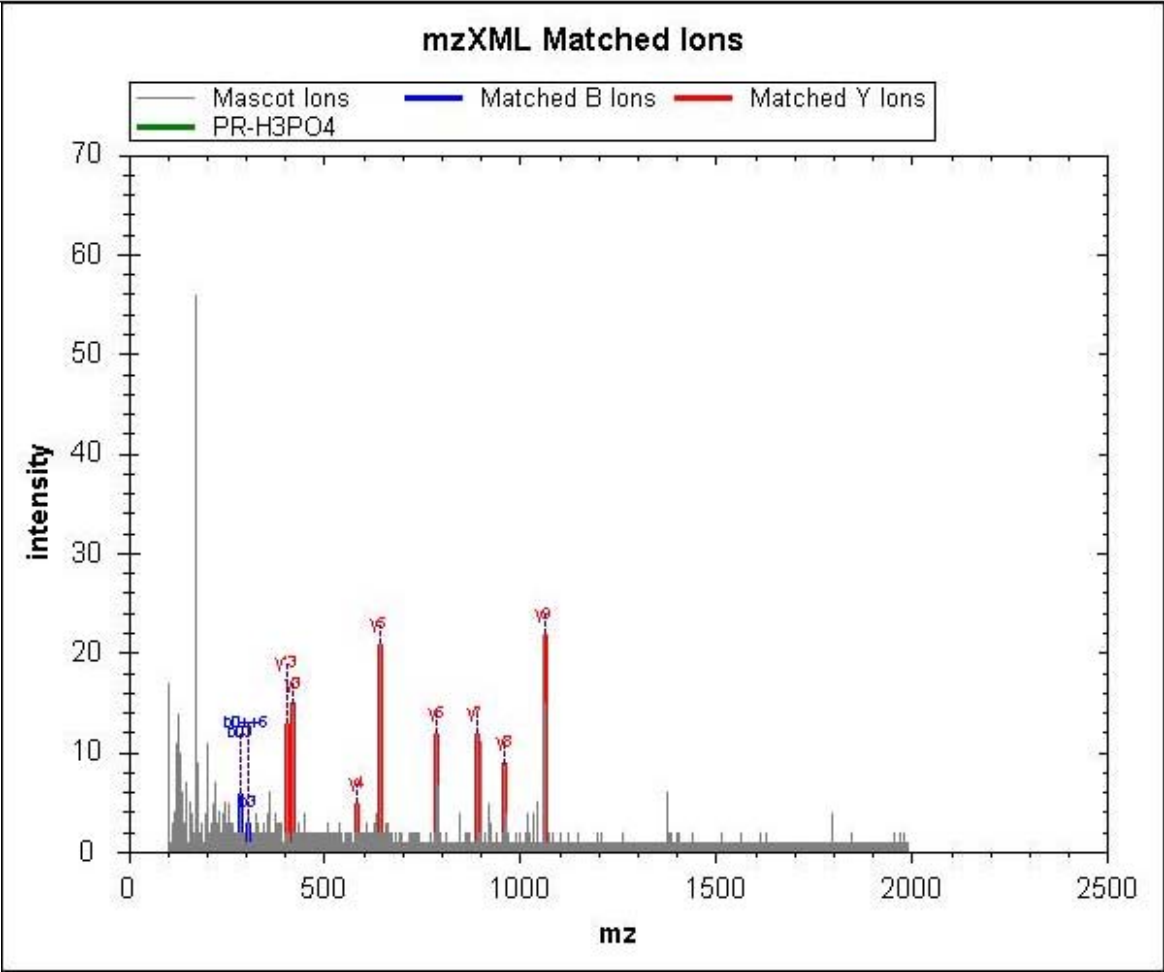

Protein index=171, ACC No:IPI00024282

Peptide index=5299 MS/MS spectrum

Sequence: SSANVEEAFFTLAR, m/z:771.3864, charge:+ 2, Modification: , Mod Position:

Score: 99.71, Raw data:WET\_A1\_090616\_01.mzxml, MS/MS Elution time: 72.05917, Scan number:3981, Mass delta:0.006, Rank:1

| No | b       | b++    | b*      | b*++   | b0      | b0++   | Seq | y       | y++    | y*      | y*++   | y0      | y0++   | RevNo |
|----|---------|--------|---------|--------|---------|--------|-----|---------|--------|---------|--------|---------|--------|-------|
| 1  | 88.04   | 44.52  |         |        | 70.03   | 35.52  | S   |         |        |         |        |         |        | 14    |
| 2  | 175.07  | 88.04  |         |        | 157.06  | 79.03  | S   | 1454.73 | 727.87 | 1437.7  | 719.35 | 1436.72 | 718.86 | 13    |
| 3  | 246.11  | 123.56 |         |        | 228.1   | 114.55 | A   | 1367.7  | 684.35 | 1350.67 | 675.84 | 1349.68 | 675.35 | 12    |
| 4  | 360.15  | 180.58 | 343.12  | 172.07 | 342.14  | 171.57 | N   | 1296.66 | 648.83 | 1279.63 | 640.32 | 1278.65 | 639.83 | 11    |
| 5  | 459.22  | 230.11 | 442.19  | 221.6  | 441.21  | 221.11 | V   | 1182.62 | 591.81 | 1165.59 | 583.3  | 1164.6  | 582.81 | 10    |
| 6  | 588.26  | 294.63 | 571.24  | 286.12 | 570.25  | 285.63 | E   | 1083.55 | 542.28 | 1066.52 | 533.76 | 1065.54 | 533.27 | 9     |
| 7  | 717.3   | 359.16 | 700.28  | 350.64 | 699.29  | 350.15 | E   | 954.5   | 477.76 | 937.48  | 469.24 | 936.49  | 468.75 | 8     |
| 8  | 788.34  | 394.67 | 771.32  | 386.16 | 770.33  | 385.67 | A   | 825.46  | 413.23 | 808.44  | 404.72 | 807.45  | 404.23 | 7     |
| 9  | 935.41  | 468.21 | 918.38  | 459.7  | 917.4   | 459.2  | F   | 754.42  | 377.72 | 737.4   | 369.2  | 736.41  | 368.71 | 6     |
| 10 | 1082.48 | 541.74 | 1065.45 | 533.23 | 1064.47 | 532.74 | F   | 607.36  | 304.18 | 590.33  | 295.67 | 589.35  | 295.18 | 5     |
| 11 | 1183.53 | 592.27 | 1166.5  | 583.75 | 1165.52 | 583.26 | T   | 460.29  | 230.65 | 443.26  | 222.13 | 442.28  | 221.64 | 4     |
| 12 | 1296.61 | 648.81 | 1279.58 | 640.3  | 1278.6  | 639.8  | L   | 359.24  | 180.12 | 342.21  | 171.61 |         |        | 3     |

|    |         |        |         |        |         |        |   |        |        |        |        |  |   |
|----|---------|--------|---------|--------|---------|--------|---|--------|--------|--------|--------|--|---|
| 13 | 1367.65 | 684.33 | 1350.62 | 675.81 | 1349.64 | 675.32 | A | 246.16 | 123.58 | 229.13 | 115.07 |  | 2 |
| 14 |         |        |         |        |         |        | R | 175.12 | 88.06  | 158.09 | 79.55  |  | 1 |

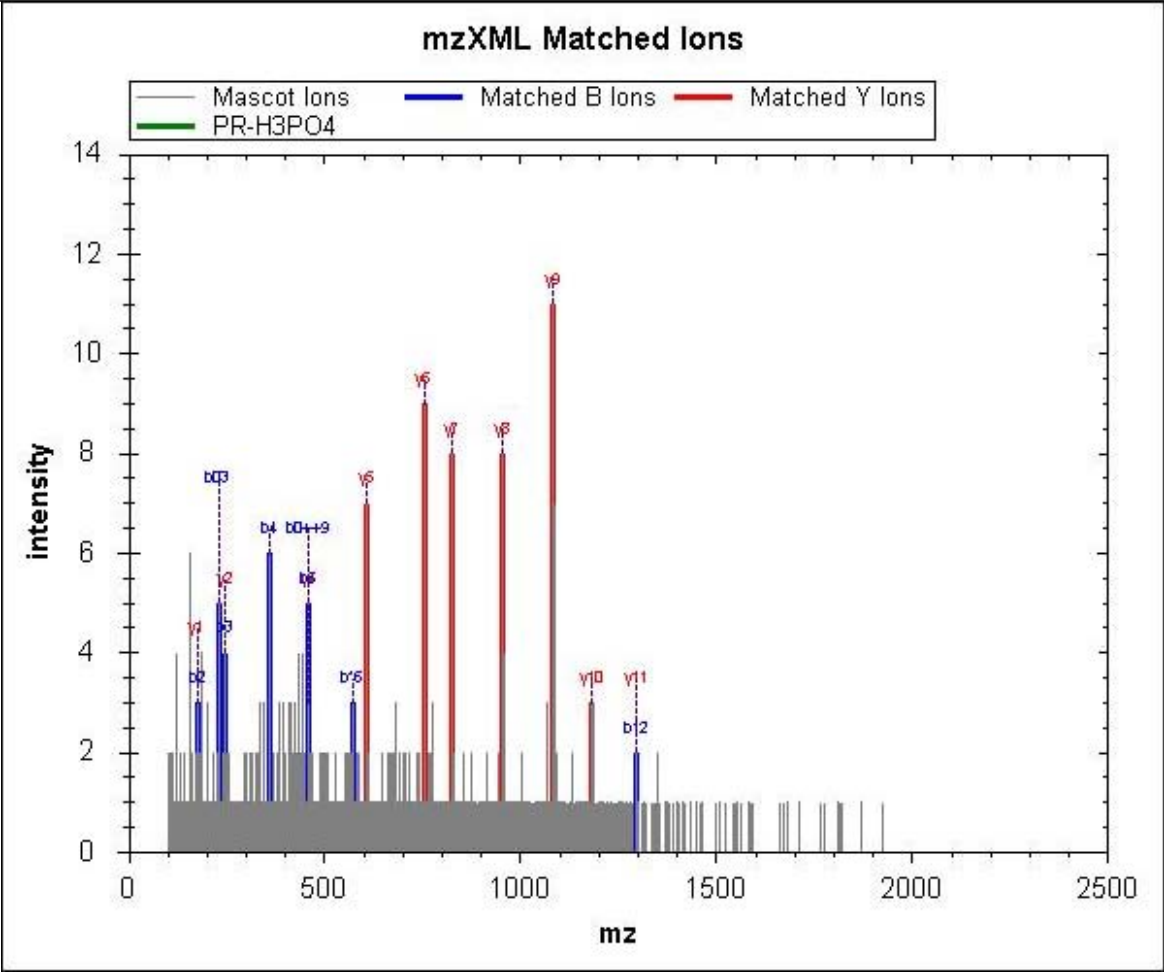

Protein index=175, ACC No: IPI00303207

Peptide index=4870 MS/MS spectrum

Sequence: FLSQLEITFR, m/z: 627.349, charge: + 2, Modification: , Mod Position:

Score: 63.95, Raw data: WET\_B1\_090616\_03.mzxml, MS/MS Elution time: 66.41634, Scan number: 3649, Mass delta: -0.0049, Rank: 1

| No | b       | b++    | b*      | b*++   | b0      | b0++   | Seq | y       | y++    | y*      | y*++   | y0      | y0++   | RevNo |
|----|---------|--------|---------|--------|---------|--------|-----|---------|--------|---------|--------|---------|--------|-------|
| 1  | 148.08  | 74.54  |         |        |         |        | F   |         |        |         |        |         |        | 10    |
| 2  | 261.16  | 131.08 |         |        |         |        | L   | 1106.62 | 553.81 | 1089.59 | 545.3  | 1088.61 | 544.81 | 9     |
| 3  | 348.19  | 174.6  |         |        | 330.18  | 165.59 | S   | 993.54  | 497.27 | 976.51  | 488.76 | 975.53  | 488.27 | 8     |
| 4  | 476.25  | 238.63 | 459.22  | 230.12 | 458.24  | 229.62 | Q   | 906.5   | 453.76 | 889.48  | 445.24 | 888.49  | 444.75 | 7     |
| 5  | 589.33  | 295.17 | 572.31  | 286.66 | 571.32  | 286.17 | L   | 778.45  | 389.73 | 761.42  | 381.21 | 760.44  | 380.72 | 6     |
| 6  | 718.38  | 359.69 | 701.35  | 351.18 | 700.37  | 350.69 | E   | 665.36  | 333.18 | 648.34  | 324.67 | 647.35  | 324.18 | 5     |
| 7  | 831.46  | 416.23 | 814.43  | 407.72 | 813.45  | 407.23 | I   | 536.32  | 268.66 | 519.29  | 260.15 | 518.31  | 259.66 | 4     |
| 8  | 932.51  | 466.76 | 915.48  | 458.24 | 914.5   | 457.75 | T   | 423.24  | 212.12 | 406.21  | 203.61 | 405.22  | 203.12 | 3     |
| 9  | 1079.58 | 540.29 | 1062.55 | 531.78 | 1061.57 | 531.29 | F   | 322.19  | 161.6  | 305.16  | 153.08 |         |        | 2     |
| 10 |         |        |         |        |         |        | R   | 175.12  | 88.06  | 158.09  | 79.55  |         |        | 1     |





|    |         |        |         |        |   |        |        |        |        |        |        |   |
|----|---------|--------|---------|--------|---|--------|--------|--------|--------|--------|--------|---|
| 9  | 922.52  | 461.77 | 904.51  | 452.76 | L | 845.51 | 423.26 | 828.48 | 414.74 | 827.5  | 414.25 | 9 |
| 10 | 979.55  | 490.28 | 961.54  | 481.27 | G | 732.42 | 366.72 | 715.4  | 358.2  | 714.41 | 357.71 | 8 |
| 11 | 1050.58 | 525.8  | 1032.57 | 516.79 | A | 675.4  | 338.21 | 658.38 | 329.69 | 657.39 | 329.2  | 7 |
| 12 | 1149.65 | 575.33 | 1131.64 | 566.32 | V | 604.37 | 302.69 | 587.34 | 294.17 | 586.36 | 293.68 | 6 |
| 13 | 1262.74 | 631.87 | 1244.72 | 622.87 | I | 505.3  | 253.15 | 488.27 | 244.64 | 487.29 | 244.15 | 5 |
| 14 | 1333.77 | 667.39 | 1315.76 | 658.38 | A | 392.21 | 196.61 | 375.19 | 188.1  | 374.2  | 187.61 | 4 |
| 15 | 1420.8  | 710.91 | 1402.79 | 701.9  | S | 321.18 | 161.09 | 304.15 | 152.58 | 303.17 | 152.09 | 3 |
| 16 | 1507.84 | 754.42 | 1489.83 | 745.42 | S | 234.14 | 117.58 | 217.12 | 109.06 | 216.13 | 108.57 | 2 |
| 17 |         |        |         |        | K | 147.11 | 74.06  | 130.09 | 65.55  |        |        | 1 |

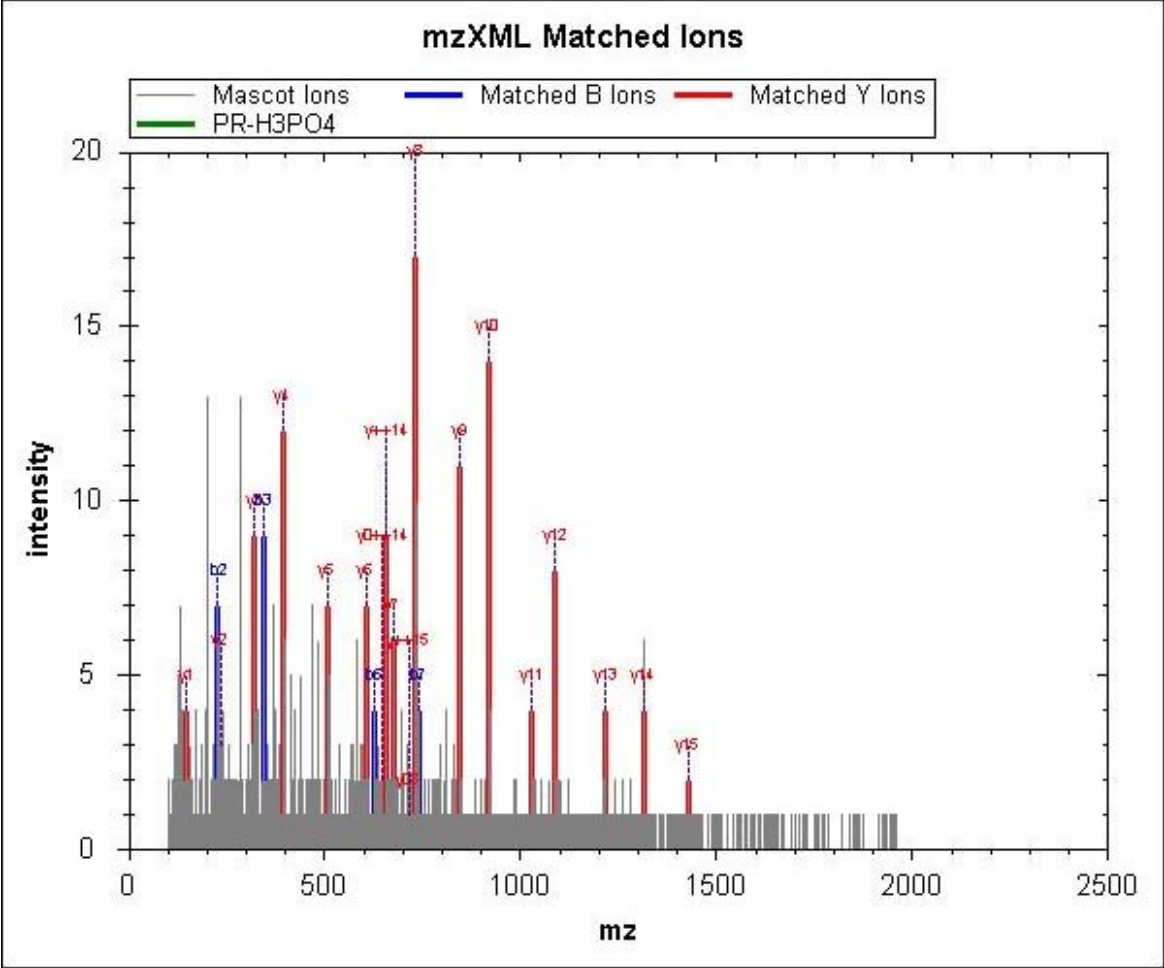

Protein index=206, ACC No:IPI00247871

Peptide index=4855 MS/MS spectrum

Sequence: EALFNEFVAAAR, m/z:669.3455, charge:+ 2, Modification: , Mod Position:

Score: 64.41, Raw data:WET\_A1\_090616\_01.mzxml, MS/MS Elution time: 66.75233, Scan number:3670, Mass delta:-0.0011, Rank:1

| No | b      | b++    | b* | b*++ | b0     | b0++   | Seq | y       | y++    | y*      | y*++   | y0      | y0++   | RevNo |
|----|--------|--------|----|------|--------|--------|-----|---------|--------|---------|--------|---------|--------|-------|
| 1  | 130.05 | 65.53  |    |      | 112.04 | 56.52  | E   |         |        |         |        |         |        | 12    |
| 2  | 201.09 | 101.05 |    |      | 183.08 | 92.04  | A   | 1208.64 | 604.82 | 1191.62 | 596.31 | 1190.63 | 595.82 | 11    |
| 3  | 314.17 | 157.59 |    |      | 296.16 | 148.58 | L   | 1137.61 | 569.31 | 1120.58 | 560.79 | 1119.59 | 560.3  | 10    |

|    |         |        |         |        |         |        |   |         |        |         |        |         |        |   |
|----|---------|--------|---------|--------|---------|--------|---|---------|--------|---------|--------|---------|--------|---|
| 4  | 461.24  | 231.12 |         |        | 443.23  | 222.12 | F | 1024.52 | 512.76 | 1007.49 | 504.25 | 1006.51 | 503.76 | 9 |
| 5  | 575.28  | 288.14 | 558.26  | 279.63 | 557.27  | 279.14 | N | 877.45  | 439.23 | 860.43  | 430.72 | 859.44  | 430.22 | 8 |
| 6  | 704.32  | 352.67 | 687.3   | 344.15 | 686.31  | 343.66 | E | 763.41  | 382.21 | 746.38  | 373.7  | 745.4   | 373.2  | 7 |
| 7  | 851.39  | 426.2  | 834.37  | 417.69 | 833.38  | 417.2  | F | 634.37  | 317.69 | 617.34  | 309.17 |         |        | 6 |
| 8  | 950.46  | 475.73 | 933.44  | 467.22 | 932.45  | 466.73 | V | 487.3   | 244.15 | 470.27  | 235.64 |         |        | 5 |
| 9  | 1021.5  | 511.25 | 1004.47 | 502.74 | 1003.49 | 502.25 | A | 388.23  | 194.62 | 371.2   | 186.11 |         |        | 4 |
| 10 | 1092.54 | 546.77 | 1075.51 | 538.26 | 1074.53 | 537.77 | A | 317.19  | 159.1  | 300.17  | 150.59 |         |        | 3 |
| 11 | 1163.57 | 582.29 | 1146.55 | 573.78 | 1145.56 | 573.28 | A | 246.16  | 123.58 | 229.13  | 115.07 |         |        | 2 |
| 12 |         |        |         |        |         |        | R | 175.12  | 88.06  | 158.09  | 79.55  |         |        | 1 |

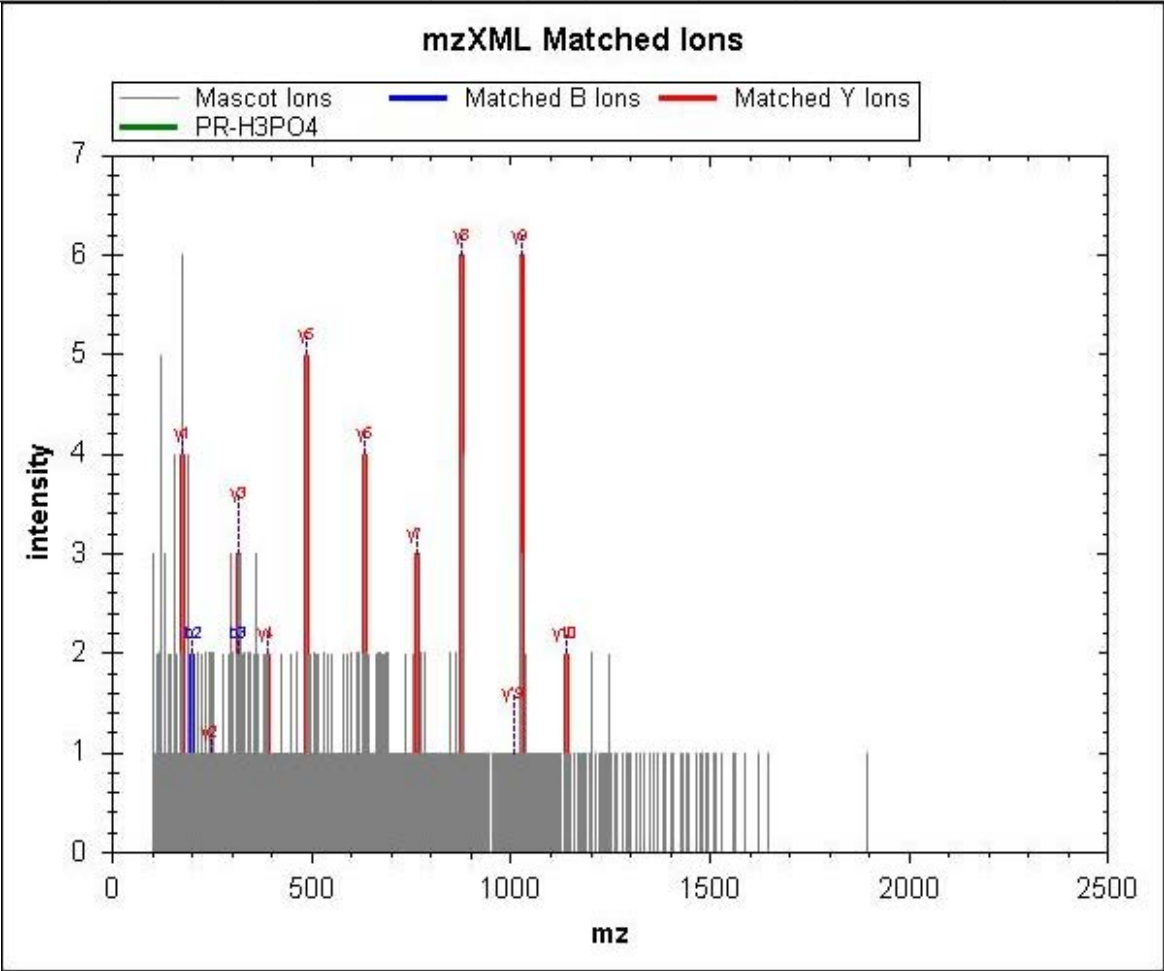

Protein index=208, ACC No:IPI00289334

Peptide index=6292 MS/MS spectrum

Sequence: LIALLEVLSQK, m/z:613.8876, charge:+ 2, Modification: , Mod Position:

Score: 54.98, Raw data:WET\_B2\_090616\_01.mzxml, MS/MS Elution time: 85.02351, Scan number:4702, Mass delta:-0.0087, Rank:1

| No | b      | b++    | b* | b*++ | b0 | b0++ | Seq | y       | y++    | y*      | y*++   | y0      | y0++   | RevNo |
|----|--------|--------|----|------|----|------|-----|---------|--------|---------|--------|---------|--------|-------|
| 1  | 114.09 | 57.55  |    |      |    |      | L   |         |        |         |        |         |        | 11    |
| 2  | 227.18 | 114.09 |    |      |    |      | I   | 1113.69 | 557.35 | 1096.66 | 548.83 | 1095.68 | 548.34 | 10    |
| 3  | 298.21 | 149.61 |    |      |    |      | A   | 1000.6  | 500.81 | 983.58  | 492.29 | 982.59  | 491.8  | 9     |

|    |         |        |         |        |         |        |   |        |        |        |        |        |        |   |
|----|---------|--------|---------|--------|---------|--------|---|--------|--------|--------|--------|--------|--------|---|
| 4  | 411.3   | 206.15 |         |        |         |        | L | 929.57 | 465.29 | 912.54 | 456.77 | 911.56 | 456.28 | 8 |
| 5  | 524.38  | 262.69 |         |        |         |        | L | 816.48 | 408.74 | 799.46 | 400.23 | 798.47 | 399.74 | 7 |
| 6  | 653.42  | 327.22 |         |        | 635.41  | 318.21 | E | 703.4  | 352.2  | 686.37 | 343.69 | 685.39 | 343.2  | 6 |
| 7  | 752.49  | 376.75 |         |        | 734.48  | 367.74 | V | 574.36 | 287.68 | 557.33 | 279.17 | 556.35 | 278.68 | 5 |
| 8  | 865.58  | 433.29 |         |        | 847.57  | 424.29 | L | 475.29 | 238.15 | 458.26 | 229.63 | 457.28 | 229.14 | 4 |
| 9  | 952.61  | 476.81 |         |        | 934.6   | 467.8  | S | 362.2  | 181.61 | 345.18 | 173.09 | 344.19 | 172.6  | 3 |
| 10 | 1080.67 | 540.84 | 1063.64 | 532.32 | 1062.66 | 531.83 | Q | 275.17 | 138.09 | 258.14 | 129.58 |        |        | 2 |
| 11 |         |        |         |        |         |        | K | 147.11 | 74.06  | 130.09 | 65.55  |        |        | 1 |

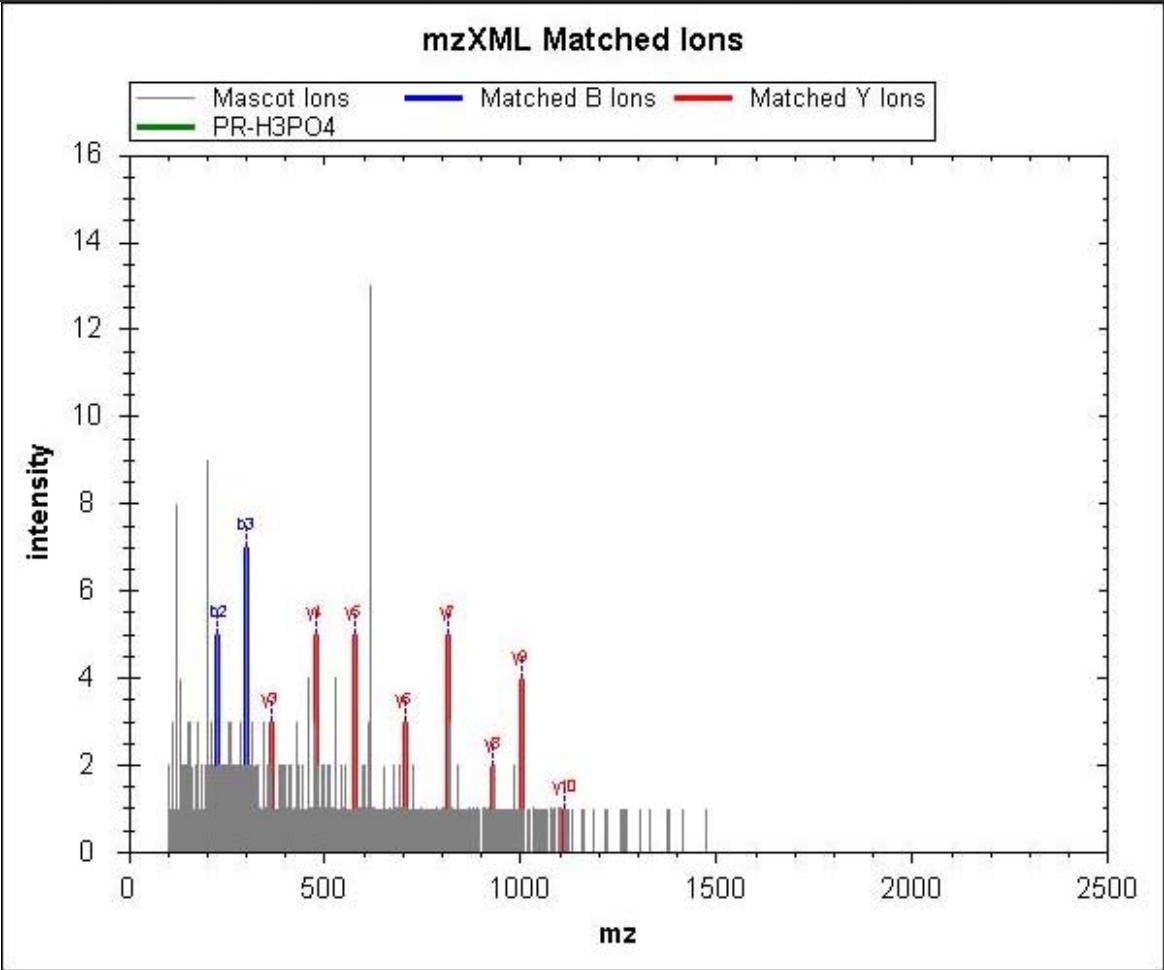

Protein index=214, ACC No:IPI00015801

Peptide index=4684 MS/MS spectrum

Sequence: SGLAAYFFMGR, m/z:618.3047, charge:+ 2, Modification: Oxidation (M), Mod Position: 0.00000000100.0

Score: 49.37, Raw data:WET\_B1\_090616\_02.mzxml, MS/MS Elution time: 64.446, Scan number:3533, Mass delta:0.0263, Rank:1

| No | b      | b++    | b0     | b0++   | Seq | y       | y++    | y*      | y*++   | RevNo |
|----|--------|--------|--------|--------|-----|---------|--------|---------|--------|-------|
| 1  | 88.04  | 44.52  | 70.03  | 35.52  | S   |         |        |         |        | 11    |
| 2  | 145.06 | 73.03  | 127.05 | 64.03  | G   | 1084.56 | 542.78 | 1067.53 | 534.27 | 10    |
| 3  | 258.14 | 129.58 | 240.13 | 120.57 | L   | 1027.54 | 514.27 | 1010.51 | 505.76 | 9     |

|    |        |        |        |        |   |        |        |        |        |   |
|----|--------|--------|--------|--------|---|--------|--------|--------|--------|---|
| 4  | 329.18 | 165.09 | 311.17 | 156.09 | A | 914.45 | 457.73 | 897.43 | 449.22 | 8 |
| 5  | 400.22 | 200.61 | 382.21 | 191.61 | A | 843.41 | 422.21 | 826.39 | 413.7  | 7 |
| 6  | 563.28 | 282.14 | 545.27 | 273.14 | Y | 772.38 | 386.69 | 755.35 | 378.18 | 6 |
| 7  | 710.35 | 355.68 | 692.34 | 346.67 | F | 609.31 | 305.16 | 592.29 | 296.65 | 5 |
| 8  | 857.42 | 429.21 | 839.41 | 420.21 | F | 462.25 | 231.63 | 445.22 | 223.11 | 4 |
| 9  | 940.46 | 470.73 | 922.45 | 461.73 | M | 315.18 | 158.09 | 298.15 | 149.58 | 3 |
| 10 | 997.48 | 499.24 | 979.47 | 490.24 | G | 232.14 | 116.57 | 215.11 | 108.06 | 2 |
| 11 |        |        |        |        | R | 175.12 | 88.06  | 158.09 | 79.55  | 1 |

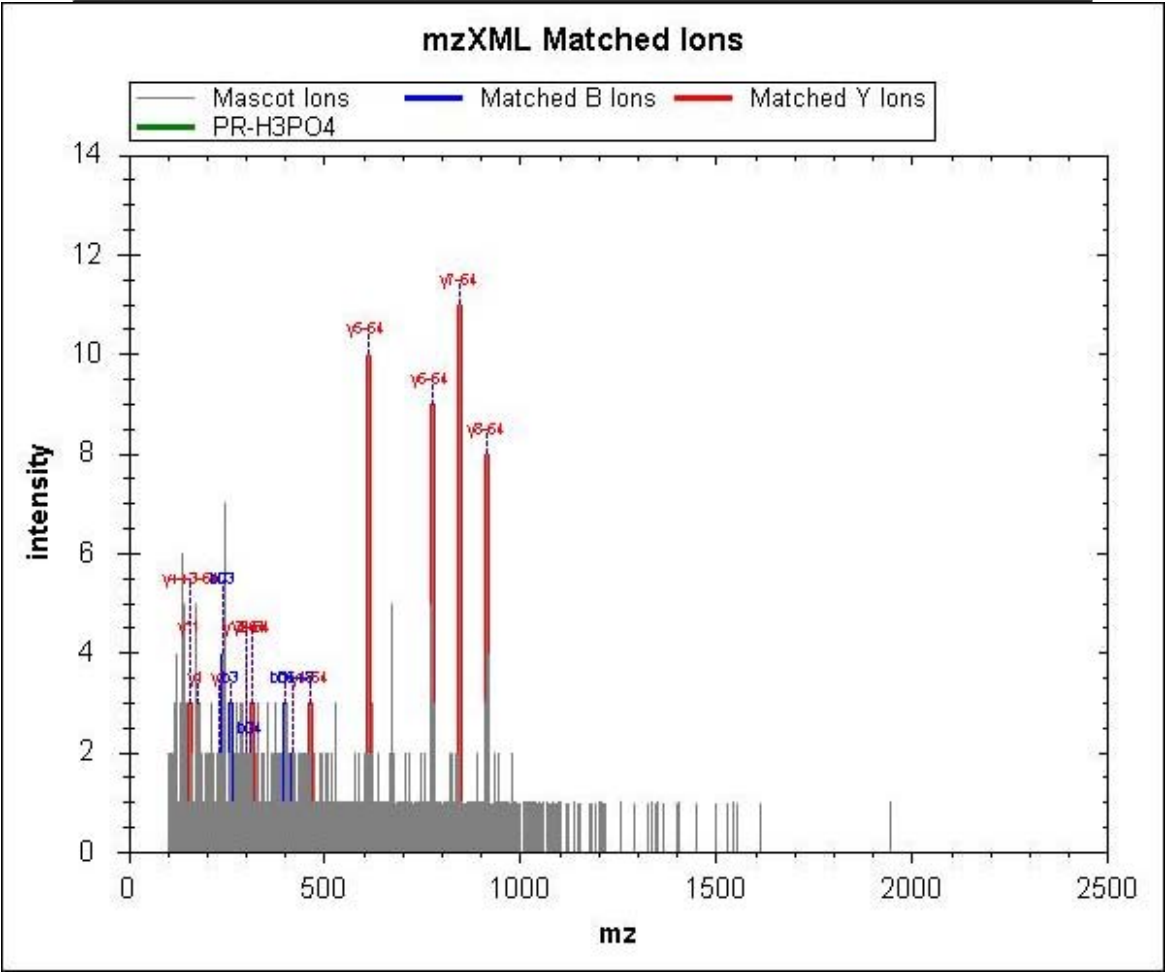

Protein index=218, ACC No:IPI00063130

Peptide index=1280 MS/MS spectrum

Sequence: GLGGEVPGSHQGPDYR, m/z:574.9447, charge:+ 3, Modification: , Mod Position:

Score: 67.55, Raw data:WET\_A1\_090616\_01.mzxml, MS/MS Elution time: 31.71033, Scan number:1618, Mass delta:0.0002, Rank:1

| No | b      | b++    | b* | b*++ | b0 | b0++ | Seq | y       | y++    | y*      | y*++   | y0      | y0++   | RevNo |
|----|--------|--------|----|------|----|------|-----|---------|--------|---------|--------|---------|--------|-------|
| 1  | 58.03  | 29.52  |    |      |    |      | G   |         |        |         |        |         |        | 17    |
| 2  | 171.11 | 86.06  |    |      |    |      | L   | 1665.8  | 833.4  | 1648.77 | 824.89 | 1647.79 | 824.4  | 16    |
| 3  | 228.13 | 114.57 |    |      |    |      | G   | 1552.71 | 776.86 | 1535.69 | 768.35 | 1534.7  | 767.86 | 15    |
| 4  | 285.16 | 143.08 |    |      |    |      | G   | 1495.69 | 748.35 | 1478.67 | 739.84 | 1477.68 | 739.34 | 14    |

|    |         |        |         |        |         |        |   |         |        |         |        |         |        |    |
|----|---------|--------|---------|--------|---------|--------|---|---------|--------|---------|--------|---------|--------|----|
| 5  | 414.2   | 207.6  |         |        | 396.19  | 198.6  | E | 1438.67 | 719.84 | 1421.64 | 711.33 | 1420.66 | 710.83 | 13 |
| 6  | 513.27  | 257.14 |         |        | 495.26  | 248.13 | V | 1309.63 | 655.32 | 1292.6  | 646.8  | 1291.62 | 646.31 | 12 |
| 7  | 610.32  | 305.66 |         |        | 592.31  | 296.66 | P | 1210.56 | 605.78 | 1193.53 | 597.27 | 1192.55 | 596.78 | 11 |
| 8  | 667.34  | 334.17 |         |        | 649.33  | 325.17 | G | 1113.51 | 557.26 | 1096.48 | 548.74 | 1095.5  | 548.25 | 10 |
| 9  | 754.37  | 377.69 |         |        | 736.36  | 368.68 | S | 1056.49 | 528.75 | 1039.46 | 520.23 | 1038.48 | 519.74 | 9  |
| 10 | 891.43  | 446.22 |         |        | 873.42  | 437.21 | H | 969.45  | 485.23 | 952.43  | 476.72 | 951.44  | 476.23 | 8  |
| 11 | 1019.49 | 510.25 | 1002.46 | 501.74 | 1001.48 | 501.24 | Q | 832.39  | 416.7  | 815.37  | 408.19 | 814.38  | 407.7  | 7  |
| 12 | 1076.51 | 538.76 | 1059.49 | 530.25 | 1058.5  | 529.75 | G | 704.34  | 352.67 | 687.31  | 344.16 | 686.33  | 343.67 | 6  |
| 13 | 1173.56 | 587.29 | 1156.54 | 578.77 | 1155.55 | 578.28 | P | 647.31  | 324.16 | 630.29  | 315.65 | 629.3   | 315.16 | 5  |
| 14 | 1288.59 | 644.8  | 1271.57 | 636.29 | 1270.58 | 635.79 | D | 550.26  | 275.63 | 533.24  | 267.12 | 532.25  | 266.63 | 4  |
| 15 | 1385.64 | 693.33 | 1368.62 | 684.81 | 1367.63 | 684.32 | P | 435.24  | 218.12 | 418.21  | 209.61 |         |        | 3  |
| 16 | 1548.71 | 774.86 | 1531.68 | 766.34 | 1530.7  | 765.85 | Y | 338.18  | 169.59 | 321.16  | 161.08 |         |        | 2  |
| 17 |         |        |         |        |         |        | R | 175.12  | 88.06  | 158.09  | 79.55  |         |        | 1  |

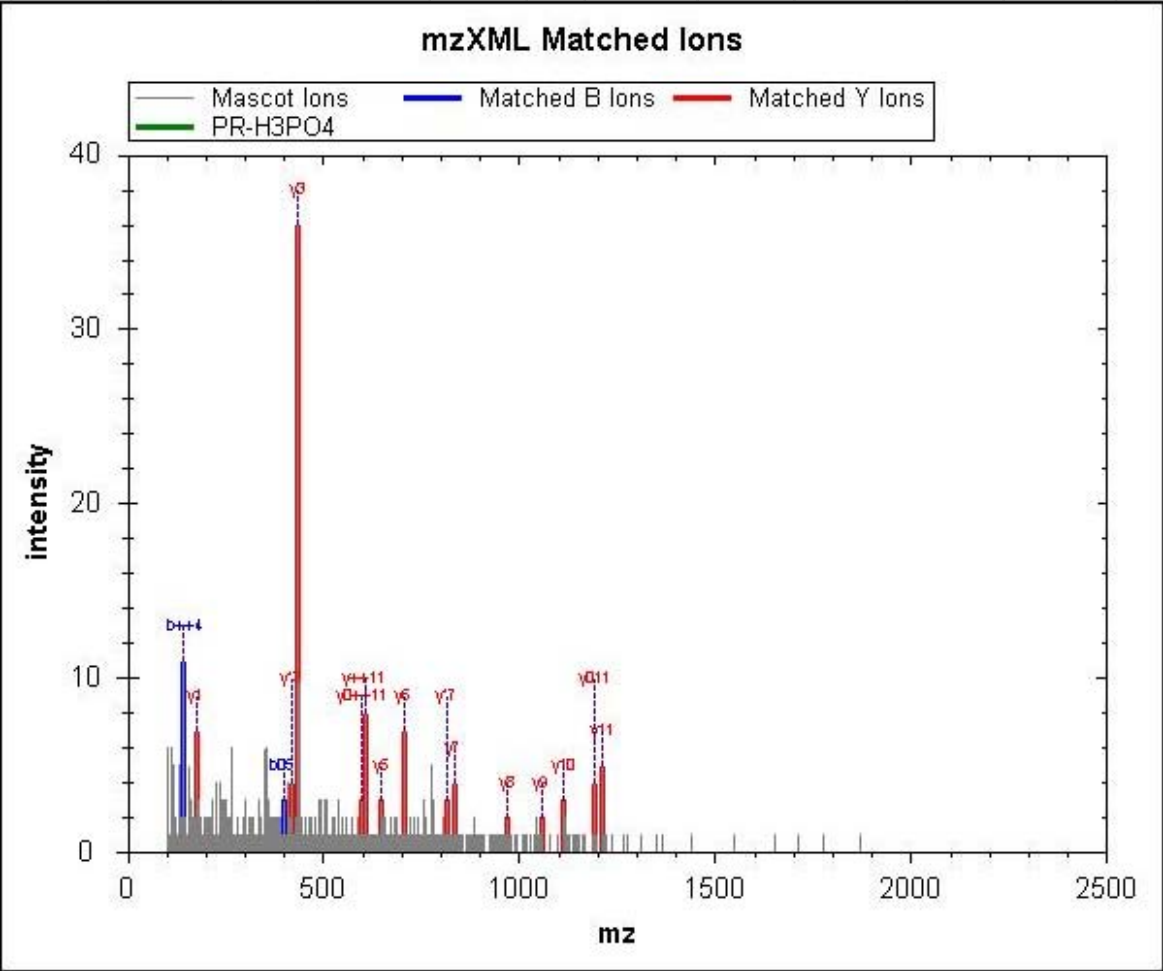

Protein index=222, ACC No:IP100306748

Peptide index=4817 MS/MS spectrum

Sequence: VAISLGFLGGAK, m/z:566.8342, charge:+ 2, Modification: , Mod Position:

Score: 75.87, Raw data:WET\_A1\_090616\_01.mzxml, MS/MS Elution time: 66.20167, Scan number:3638, Mass delta:-0.0114, Rank:1

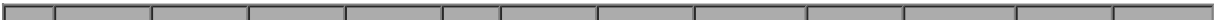

| No | b      | b++    | b0     | b0++   | Seq | y      | y++    | y*      | y*++   | y0      | y0++   | RevNo |
|----|--------|--------|--------|--------|-----|--------|--------|---------|--------|---------|--------|-------|
| 1  | 100.08 | 50.54  |        |        | V   |        |        |         |        |         |        | 12    |
| 2  | 171.11 | 86.06  |        |        | A   | 1033.6 | 517.31 | 1016.58 | 508.79 | 1015.59 | 508.3  | 11    |
| 3  | 284.2  | 142.6  |        |        | I   | 962.57 | 481.79 | 945.54  | 473.27 | 944.56  | 472.78 | 10    |
| 4  | 371.23 | 186.12 | 353.22 | 177.11 | S   | 849.48 | 425.25 | 832.46  | 416.73 | 831.47  | 416.24 | 9     |
| 5  | 484.31 | 242.66 | 466.3  | 233.65 | L   | 762.45 | 381.73 | 745.42  | 373.22 |         |        | 8     |
| 6  | 541.33 | 271.17 | 523.32 | 262.17 | G   | 649.37 | 325.19 | 632.34  | 316.67 |         |        | 7     |
| 7  | 688.4  | 344.71 | 670.39 | 335.7  | F   | 592.35 | 296.68 | 575.32  | 288.16 |         |        | 6     |
| 8  | 801.49 | 401.25 | 783.48 | 392.24 | L   | 445.28 | 223.14 | 428.25  | 214.63 |         |        | 5     |
| 9  | 858.51 | 429.76 | 840.5  | 420.75 | G   | 332.19 | 166.6  | 315.17  | 158.09 |         |        | 4     |
| 10 | 915.53 | 458.27 | 897.52 | 449.26 | G   | 275.17 | 138.09 | 258.14  | 129.58 |         |        | 3     |
| 11 | 986.57 | 493.79 | 968.56 | 484.78 | A   | 218.15 | 109.58 | 201.12  | 101.07 |         |        | 2     |
| 12 |        |        |        |        | K   | 147.11 | 74.06  | 130.09  | 65.55  |         |        | 1     |

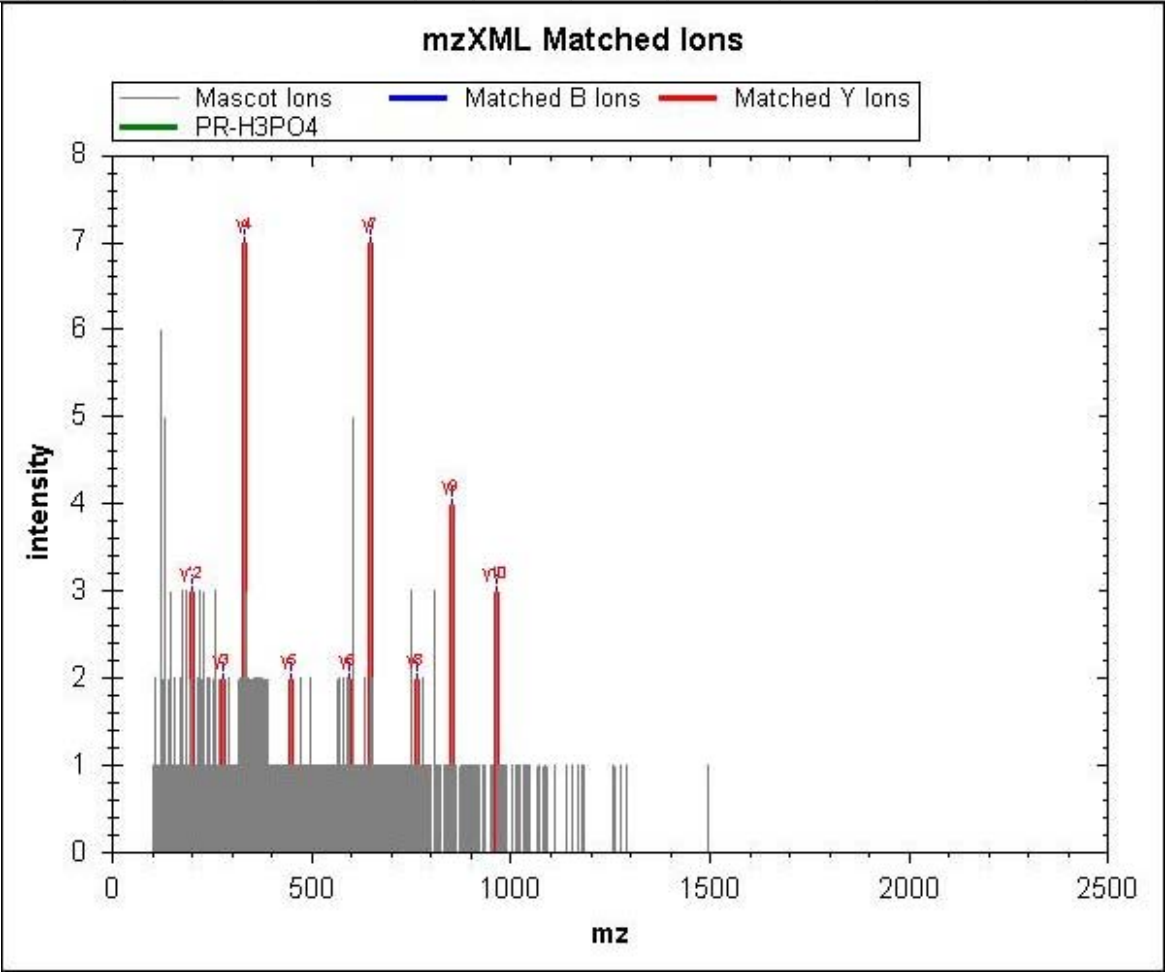

Protein index=223, ACC No:IPI00002372

Peptide index=6382 MS/MS spectrum

Sequence: VLGELWPLFGGR, m/z:672.3802, charge:+ 2, Modification: , Mod Position:

Score: 41.38, Raw data:WET\_A1\_090616\_01.mzxml, MS/MS Elution time: 87.95766, Scan number:4911, Mass delta:0.0061, Rank:1

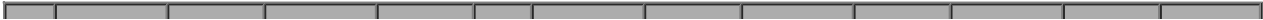

| No | b       | b++    | b0      | b0++   | Seq | y       | y++    | y*      | y*++   | y0      | y0++   | RevNo |
|----|---------|--------|---------|--------|-----|---------|--------|---------|--------|---------|--------|-------|
| 1  | 100.08  | 50.54  |         |        | V   |         |        |         |        |         |        | 12    |
| 2  | 213.16  | 107.08 |         |        | L   | 1244.68 | 622.84 | 1227.65 | 614.33 | 1226.67 | 613.84 | 11    |
| 3  | 270.18  | 135.59 |         |        | G   | 1131.59 | 566.3  | 1114.57 | 557.79 | 1113.58 | 557.3  | 10    |
| 4  | 399.22  | 200.12 | 381.21  | 191.11 | E   | 1074.57 | 537.79 | 1057.55 | 529.28 | 1056.56 | 528.78 | 9     |
| 5  | 512.31  | 256.66 | 494.3   | 247.65 | L   | 945.53  | 473.27 | 928.5   | 464.76 |         |        | 8     |
| 6  | 698.39  | 349.7  | 680.38  | 340.69 | W   | 832.45  | 416.73 | 815.42  | 408.21 |         |        | 7     |
| 7  | 795.44  | 398.22 | 777.43  | 389.22 | P   | 646.37  | 323.69 | 629.34  | 315.17 |         |        | 6     |
| 8  | 908.52  | 454.77 | 890.51  | 445.76 | L   | 549.31  | 275.16 | 532.29  | 266.65 |         |        | 5     |
| 9  | 1055.59 | 528.3  | 1037.58 | 519.29 | F   | 436.23  | 218.62 | 419.2   | 210.11 |         |        | 4     |
| 10 | 1112.61 | 556.81 | 1094.6  | 547.81 | G   | 289.16  | 145.08 | 272.14  | 136.57 |         |        | 3     |
| 11 | 1169.64 | 585.32 | 1151.62 | 576.32 | G   | 232.14  | 116.57 | 215.11  | 108.06 |         |        | 2     |
| 12 |         |        |         |        | R   | 175.12  | 88.06  | 158.09  | 79.55  |         |        | 1     |

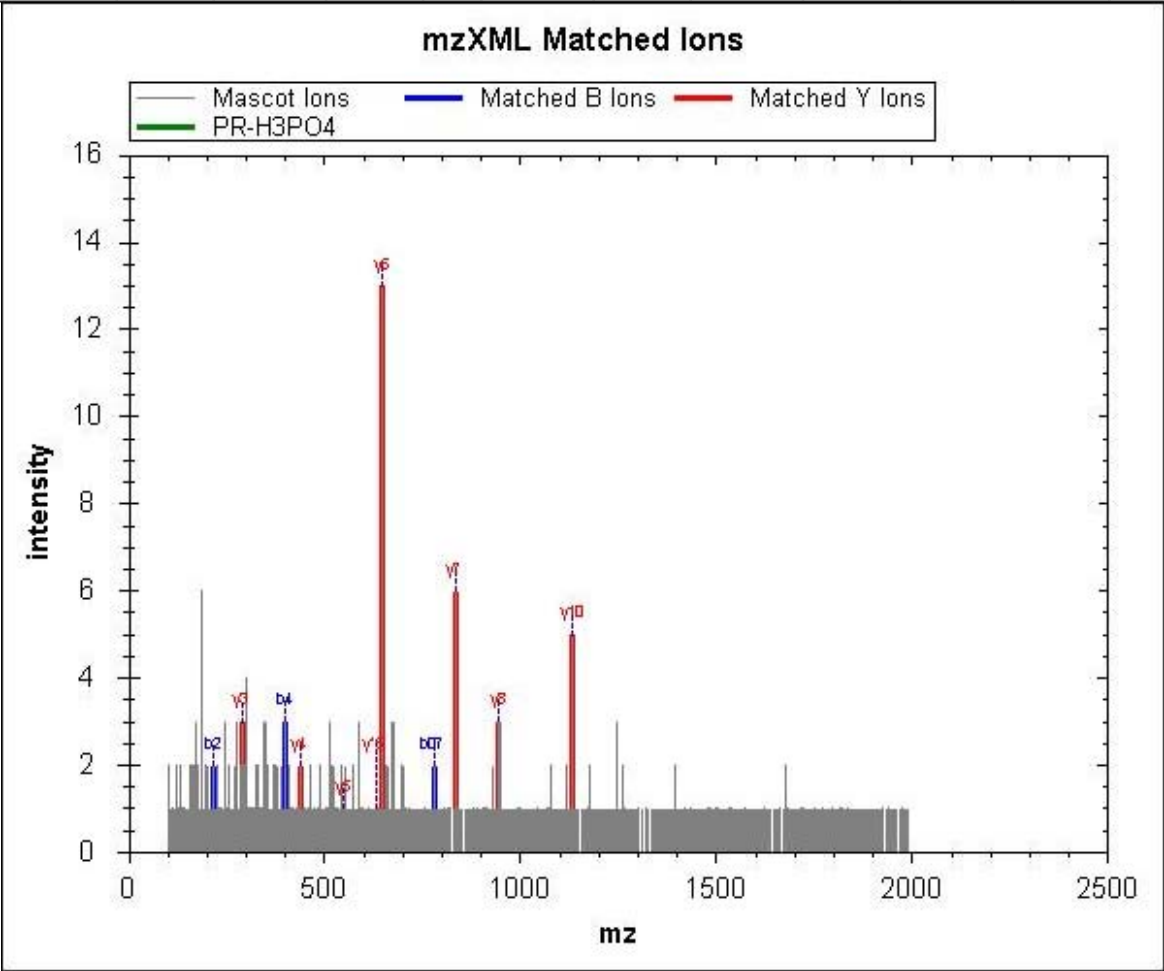

Protein index=225, ACC No:IP100032903

Peptide index=5241 MS/MS spectrum

Sequence: APDEETLIALLAHAK, m/z:531.2927, charge:+ 3, Modification: , Mod Position:

Score: 39.63, Raw data:WET\_B1\_090616\_02.mzxml, MS/MS Elution time: 70.81417, Scan number:3906, Mass delta:-0.0078, Rank:1

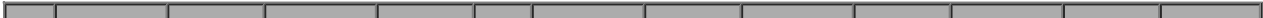

| No | b       | b++    | b0      | b0++   | Seq | y       | y++    | y*      | y*++   | y0      | y0++   | RevNo |
|----|---------|--------|---------|--------|-----|---------|--------|---------|--------|---------|--------|-------|
| 1  | 72.04   | 36.53  |         |        | A   |         |        |         |        |         |        | 15    |
| 2  | 169.1   | 85.05  |         |        | P   | 1520.83 | 760.92 | 1503.81 | 752.41 | 1502.82 | 751.91 | 14    |
| 3  | 284.12  | 142.57 | 266.11  | 133.56 | D   | 1423.78 | 712.39 | 1406.75 | 703.88 | 1405.77 | 703.39 | 13    |
| 4  | 413.17  | 207.09 | 395.16  | 198.08 | E   | 1308.75 | 654.88 | 1291.73 | 646.37 | 1290.74 | 645.87 | 12    |
| 5  | 542.21  | 271.61 | 524.2   | 262.6  | E   | 1179.71 | 590.36 | 1162.68 | 581.85 | 1161.7  | 581.35 | 11    |
| 6  | 643.26  | 322.13 | 625.25  | 313.13 | T   | 1050.67 | 525.84 | 1033.64 | 517.32 | 1032.66 | 516.83 | 10    |
| 7  | 756.34  | 378.67 | 738.33  | 369.67 | L   | 949.62  | 475.31 | 932.59  | 466.8  |         |        | 9     |
| 8  | 869.43  | 435.22 | 851.41  | 426.21 | I   | 836.54  | 418.77 | 819.51  | 410.26 |         |        | 8     |
| 9  | 940.46  | 470.73 | 922.45  | 461.73 | A   | 723.45  | 362.23 | 706.42  | 353.72 |         |        | 7     |
| 10 | 1053.55 | 527.28 | 1035.54 | 518.27 | L   | 652.41  | 326.71 | 635.39  | 318.2  |         |        | 6     |
| 11 | 1166.63 | 583.82 | 1148.62 | 574.81 | L   | 539.33  | 270.17 | 522.3   | 261.66 |         |        | 5     |
| 12 | 1237.67 | 619.34 | 1219.66 | 610.33 | A   | 426.25  | 213.63 | 409.22  | 205.11 |         |        | 4     |
| 13 | 1374.73 | 687.87 | 1356.72 | 678.86 | H   | 355.21  | 178.11 | 338.18  | 169.59 |         |        | 3     |
| 14 | 1445.76 | 723.39 | 1427.75 | 714.38 | A   | 218.15  | 109.58 | 201.12  | 101.07 |         |        | 2     |
| 15 |         |        |         |        | K   | 147.11  | 74.06  | 130.09  | 65.55  |         |        | 1     |

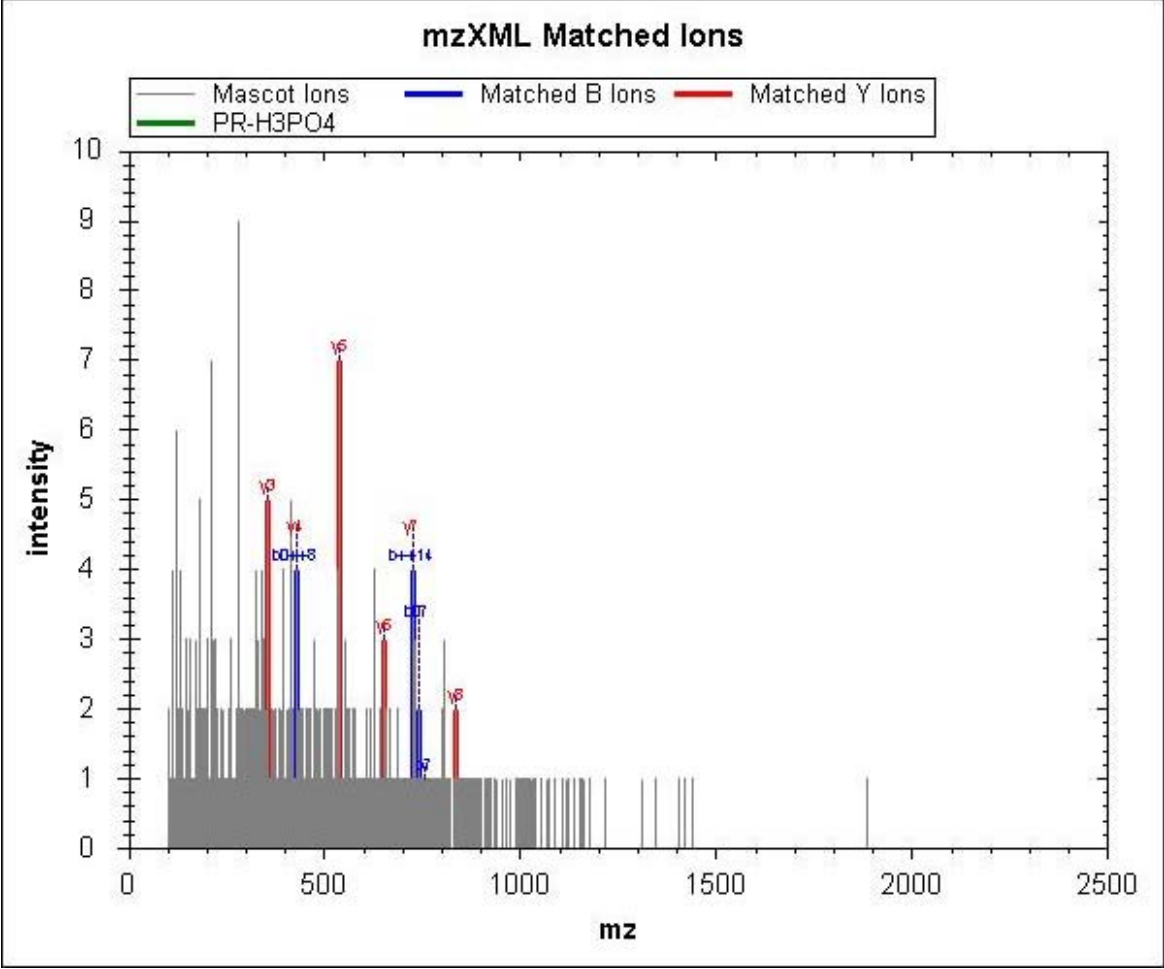

Protein index=229, ACC No:IPI00299084

Peptide index=4776 MS/MS spectrum

Sequence: ALLANALTSALR, m/z:607.3653, charge:+ 2, Modification: , Mod Position:

Score: 78.89, Raw data:WET\_B1\_090616\_02.mzxml, MS/MS Elution time: 65.344, Scan number:3586, Mass delta:-0.0061, Rank:1

| No | b       | b++    | b*      | b*++   | b0     | b0++   | Seq | y       | y++    | y*      | y*++   | y0      | y0++   | RevNo |
|----|---------|--------|---------|--------|--------|--------|-----|---------|--------|---------|--------|---------|--------|-------|
| 1  | 72.04   | 36.53  |         |        |        |        | A   |         |        |         |        |         |        | 12    |
| 2  | 185.13  | 93.07  |         |        |        |        | L   | 1142.69 | 571.85 | 1125.66 | 563.33 | 1124.68 | 562.84 | 11    |
| 3  | 298.21  | 149.61 |         |        |        |        | L   | 1029.61 | 515.31 | 1012.58 | 506.79 | 1011.59 | 506.3  | 10    |
| 4  | 369.25  | 185.13 |         |        |        |        | A   | 916.52  | 458.76 | 899.49  | 450.25 | 898.51  | 449.76 | 9     |
| 5  | 483.29  | 242.15 | 466.27  | 233.64 |        |        | N   | 845.48  | 423.25 | 828.46  | 414.73 | 827.47  | 414.24 | 8     |
| 6  | 554.33  | 277.67 | 537.3   | 269.16 |        |        | A   | 731.44  | 366.22 | 714.41  | 357.71 | 713.43  | 357.22 | 7     |
| 7  | 667.41  | 334.21 | 650.39  | 325.7  |        |        | L   | 660.4   | 330.71 | 643.38  | 322.19 | 642.39  | 321.7  | 6     |
| 8  | 768.46  | 384.73 | 751.43  | 376.22 | 750.45 | 375.73 | T   | 547.32  | 274.16 | 530.29  | 265.65 | 529.31  | 265.16 | 5     |
| 9  | 855.49  | 428.25 | 838.47  | 419.74 | 837.48 | 419.25 | S   | 446.27  | 223.64 | 429.25  | 215.13 | 428.26  | 214.63 | 4     |
| 10 | 926.53  | 463.77 | 909.5   | 455.26 | 908.52 | 454.76 | A   | 359.24  | 180.12 | 342.21  | 171.61 |         |        | 3     |
| 11 | 1039.61 | 520.31 | 1022.59 | 511.8  | 1021.6 | 511.31 | L   | 288.2   | 144.61 | 271.18  | 136.09 |         |        | 2     |
| 12 |         |        |         |        |        |        | R   | 175.12  | 88.06  | 158.09  | 79.55  |         |        | 1     |

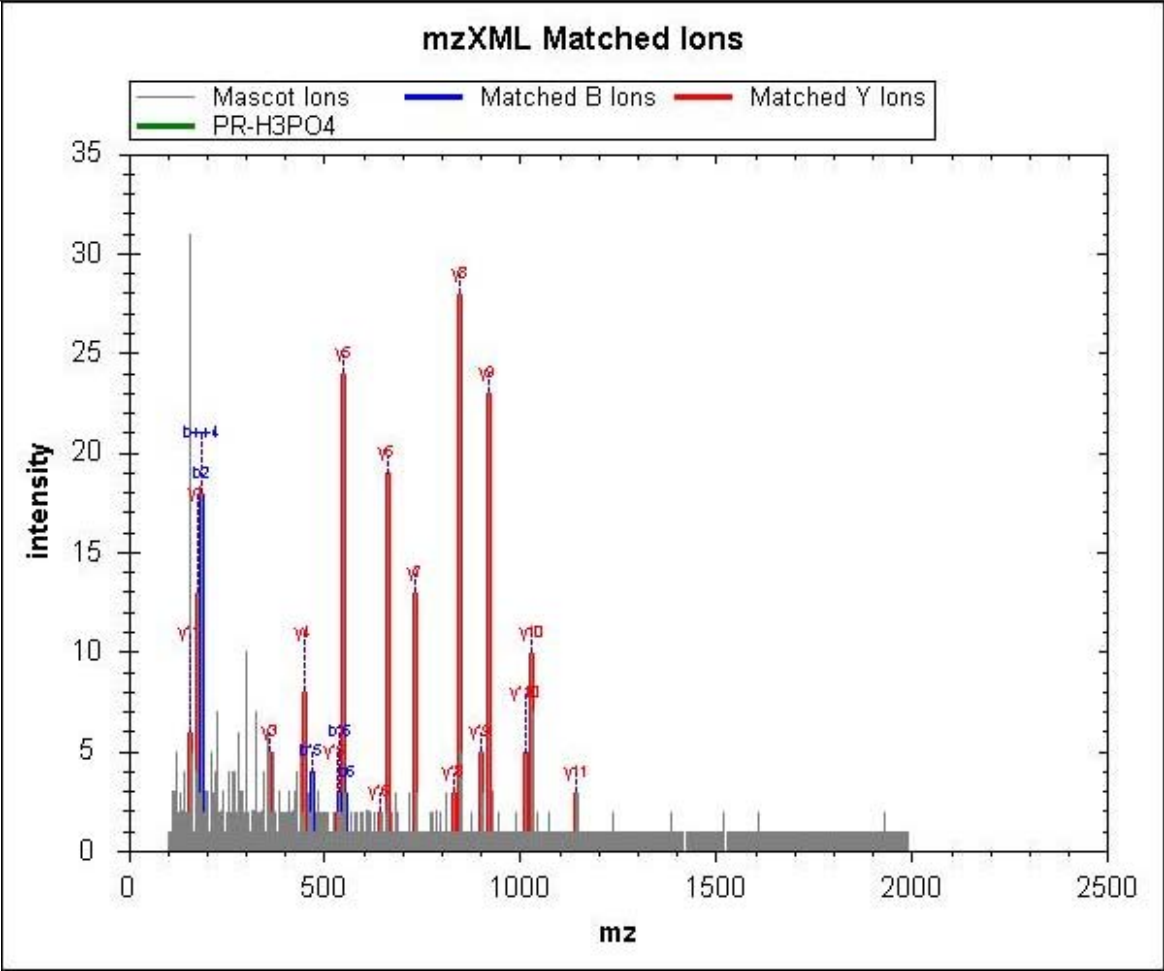

Protein index=232, ACC No:IPI00170594

Peptide index=5520 MS/MS spectrum

Sequence: VAIAENLLDVIK, m/z:649.3925, charge:+ 2, Modification: , Mod Position:

Score: 68.69, Raw data:WET\_B1\_090616\_02.mzxml, MS/MS Elution time: 74.5895, Scan number:4127, Mass delta:-0.0017, Rank:1

| No | b       | b++    | b*      | b*++   | b0      | b0++   | Seq | y       | y++    | y*      | y*++   | y0      | y0++   | RevNo |
|----|---------|--------|---------|--------|---------|--------|-----|---------|--------|---------|--------|---------|--------|-------|
| 1  | 100.08  | 50.54  |         |        |         |        | V   |         |        |         |        |         |        | 12    |
| 2  | 171.11  | 86.06  |         |        |         |        | A   | 1198.7  | 599.86 | 1181.68 | 591.34 | 1180.69 | 590.85 | 11    |
| 3  | 284.2   | 142.6  |         |        |         |        | I   | 1127.67 | 564.34 | 1110.64 | 555.82 | 1109.66 | 555.33 | 10    |
| 4  | 355.23  | 178.12 |         |        |         |        | A   | 1014.58 | 507.8  | 997.56  | 499.28 | 996.57  | 498.79 | 9     |
| 5  | 484.28  | 242.64 |         |        | 466.27  | 233.64 | E   | 943.55  | 472.28 | 926.52  | 463.76 | 925.54  | 463.27 | 8     |
| 6  | 598.32  | 299.66 | 581.29  | 291.15 | 580.31  | 290.66 | N   | 814.5   | 407.76 | 797.48  | 399.24 | 796.49  | 398.75 | 7     |
| 7  | 711.4   | 356.21 | 694.38  | 347.69 | 693.39  | 347.2  | L   | 700.46  | 350.73 | 683.43  | 342.22 | 682.45  | 341.73 | 6     |
| 8  | 824.49  | 412.75 | 807.46  | 404.23 | 806.48  | 403.74 | L   | 587.38  | 294.19 | 570.35  | 285.68 | 569.37  | 285.19 | 5     |
| 9  | 939.51  | 470.26 | 922.49  | 461.75 | 921.5   | 461.26 | D   | 474.29  | 237.65 | 457.27  | 229.14 | 456.28  | 228.64 | 4     |
| 10 | 1038.58 | 519.8  | 1021.56 | 511.28 | 1020.57 | 510.79 | V   | 359.27  | 180.14 | 342.24  | 171.62 |         |        | 3     |
| 11 | 1151.67 | 576.34 | 1134.64 | 567.82 | 1133.66 | 567.33 | I   | 260.2   | 130.6  | 243.17  | 122.09 |         |        | 2     |
| 12 |         |        |         |        |         |        | K   | 147.11  | 74.06  | 130.09  | 65.55  |         |        | 1     |

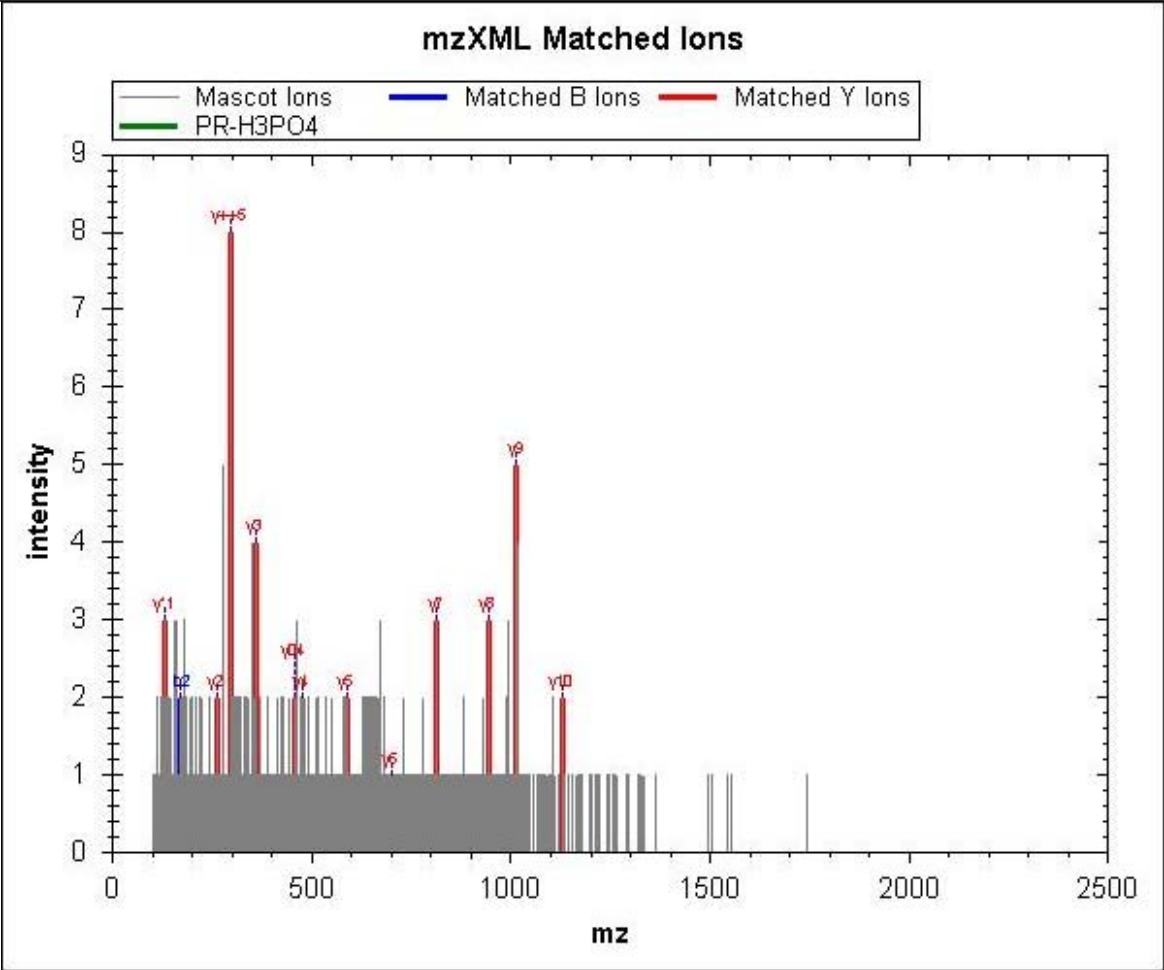

Protein index=235, ACC No:IPI00005728

Peptide index=4096 MS/MS spectrum

Sequence: LGQIQSWLDK, m/z:675.8573, charge:+ 2, Modification: , Mod Position:

Score: 79.68, Raw data:WET\_A1\_090616\_01.mzxml, MS/MS Elution time: 59.22133, Scan number:3229, Mass delta:0.0022, Rank:1

| No | b       | b++    | b*      | b*++   | b0      | b0++   | Seq | y       | y++    | y*      | y*++   | y0      | y0++   | RevNo |
|----|---------|--------|---------|--------|---------|--------|-----|---------|--------|---------|--------|---------|--------|-------|
| 1  | 114.09  | 57.55  |         |        |         |        | L   |         |        |         |        |         |        | 11    |
| 2  | 171.11  | 86.06  |         |        |         |        | G   | 1237.62 | 619.31 | 1220.59 | 610.8  | 1219.61 | 610.31 | 10    |
| 3  | 299.17  | 150.09 | 282.14  | 141.58 |         |        | Q   | 1180.6  | 590.8  | 1163.57 | 582.29 | 1162.59 | 581.8  | 9     |
| 4  | 412.26  | 206.63 | 395.23  | 198.12 |         |        | I   | 1052.54 | 526.77 | 1035.51 | 518.26 | 1034.53 | 517.77 | 8     |
| 5  | 575.32  | 288.16 | 558.29  | 279.65 |         |        | Y   | 939.46  | 470.23 | 922.43  | 461.72 | 921.45  | 461.23 | 7     |
| 6  | 703.38  | 352.19 | 686.35  | 343.68 |         |        | Q   | 776.39  | 388.7  | 759.37  | 380.19 | 758.38  | 379.7  | 6     |
| 7  | 790.41  | 395.71 | 773.38  | 387.2  | 772.4   | 386.7  | S   | 648.34  | 324.67 | 631.31  | 316.16 | 630.32  | 315.67 | 5     |
| 8  | 976.49  | 488.75 | 959.46  | 480.23 | 958.48  | 479.74 | W   | 561.3   | 281.16 | 544.28  | 272.64 | 543.29  | 272.15 | 4     |
| 9  | 1089.57 | 545.29 | 1072.55 | 536.78 | 1071.56 | 536.28 | L   | 375.22  | 188.12 | 358.2   | 179.6  | 357.21  | 179.11 | 3     |
| 10 | 1204.6  | 602.8  | 1187.57 | 594.29 | 1186.59 | 593.8  | D   | 262.14  | 131.57 | 245.11  | 123.06 | 244.13  | 122.57 | 2     |
| 11 |         |        |         |        |         |        | K   | 147.11  | 74.06  | 130.09  | 65.55  |         |        | 1     |

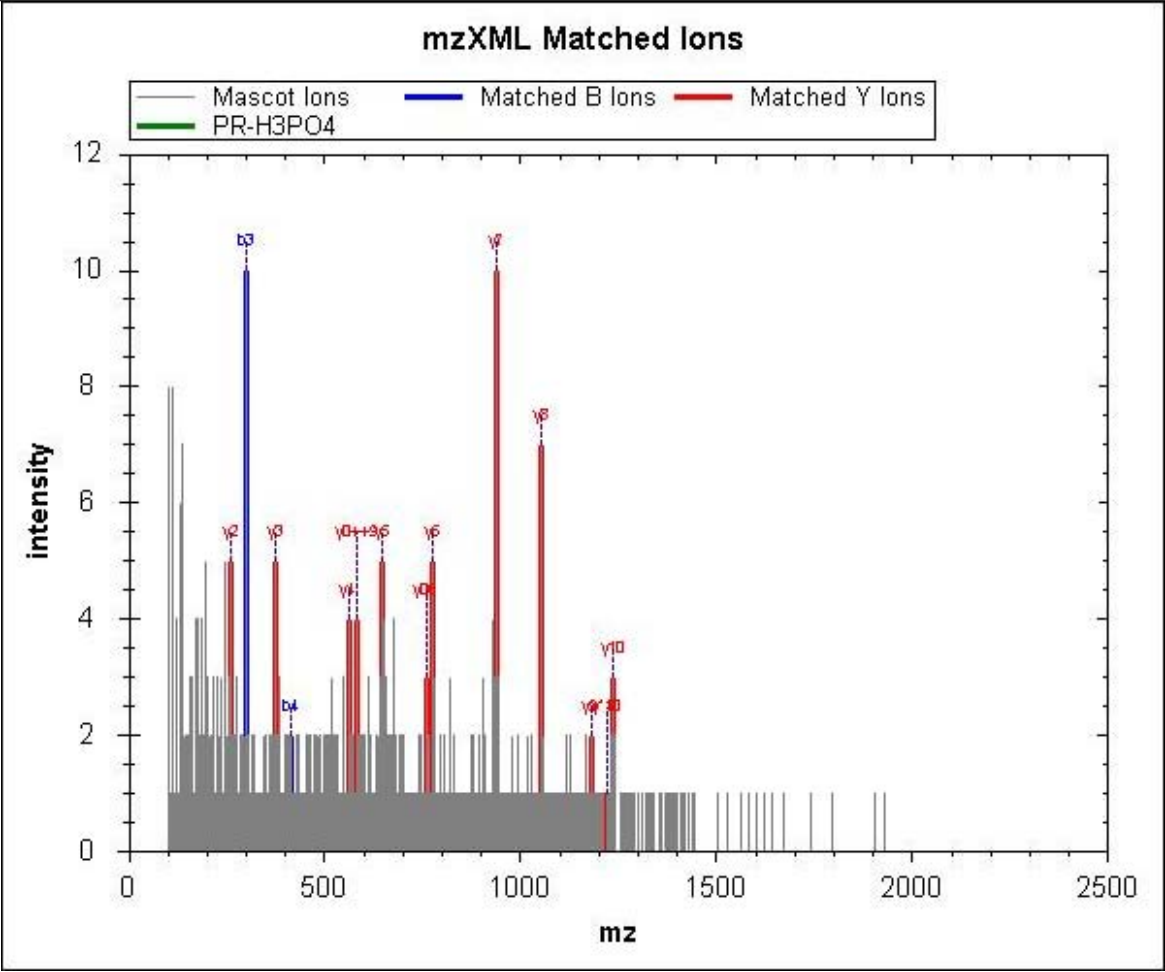

Protein index=240, ACC No:IPI00217471

Peptide index=4643 MS/MS spectrum

Sequence: LLVVYPWTQR, m/z:637.8664, charge:+ 2, Modification: , Mod Position:

Score: 65.22, Raw data:WET\_A5\_090615\_03.mzxml, MS/MS Elution time: 64.0995, Scan number:3512,

Mass delta:-0.0138, Rank:1

| No | b       | b++    | b*      | b*++  | b0     | b0++   | Seq | y       | y++    | y*      | y*++   | y0      | y0++   | RevNo |
|----|---------|--------|---------|-------|--------|--------|-----|---------|--------|---------|--------|---------|--------|-------|
| 1  | 114.09  | 57.55  |         |       |        |        | L   |         |        |         |        |         |        | 10    |
| 2  | 227.18  | 114.09 |         |       |        |        | L   | 1161.64 | 581.32 | 1144.61 | 572.81 | 1143.63 | 572.32 | 9     |
| 3  | 326.24  | 163.63 |         |       |        |        | V   | 1048.56 | 524.78 | 1031.53 | 516.27 | 1030.55 | 515.78 | 8     |
| 4  | 425.31  | 213.16 |         |       |        |        | V   | 949.49  | 475.25 | 932.46  | 466.73 | 931.48  | 466.24 | 7     |
| 5  | 588.38  | 294.69 |         |       |        |        | Y   | 850.42  | 425.71 | 833.39  | 417.2  | 832.41  | 416.71 | 6     |
| 6  | 685.43  | 343.22 |         |       |        |        | P   | 687.36  | 344.18 | 670.33  | 335.67 | 669.35  | 335.18 | 5     |
| 7  | 871.51  | 436.26 |         |       |        |        | W   | 590.3   | 295.66 | 573.28  | 287.14 | 572.29  | 286.65 | 4     |
| 8  | 972.56  | 486.78 |         |       | 954.54 | 477.78 | T   | 404.23  | 202.62 | 387.2   | 194.1  | 386.21  | 193.61 | 3     |
| 9  | 1100.61 | 550.81 | 1083.59 | 542.3 | 1082.6 | 541.81 | Q   | 303.18  | 152.09 | 286.15  | 143.58 |         |        | 2     |
| 10 |         |        |         |       |        |        | R   | 175.12  | 88.06  | 158.09  | 79.55  |         |        | 1     |

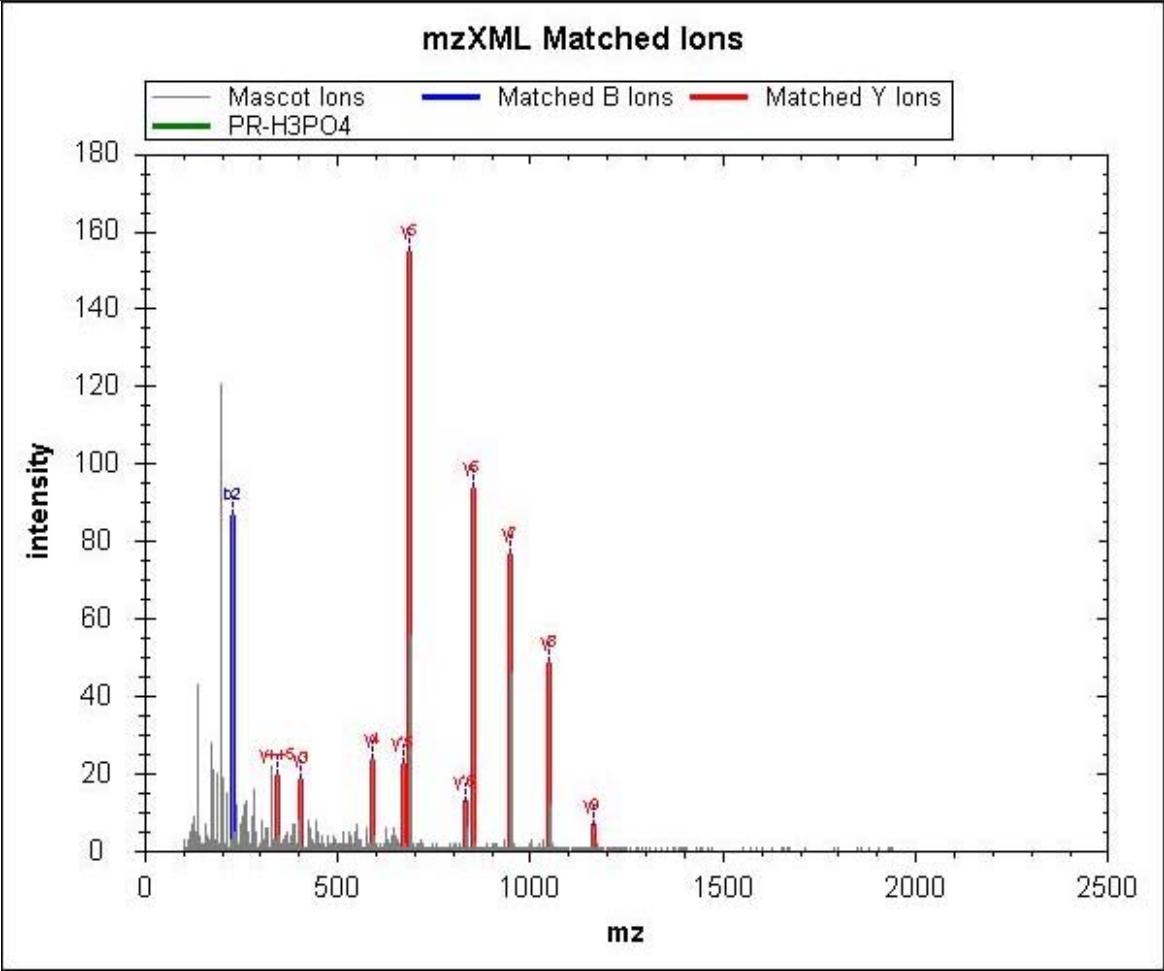

Protein index=242, ACC No:IP100153005

Peptide index=824 MS/MS spectrum

Sequence: AAPDVAPAPGPAPR, m/z:679.3628, charge:+ 2, Modification: , Mod Position:

Score: 56.75, Raw data:WET\_B1\_090616\_02.mzxml, MS/MS Elution time: 25.32233, Scan number:1242, Mass delta:-0.0023, Rank:1

|  |  |  |  |  |  |  |  |  |  |  |  |  |  |  |
|--|--|--|--|--|--|--|--|--|--|--|--|--|--|--|
|  |  |  |  |  |  |  |  |  |  |  |  |  |  |  |
|--|--|--|--|--|--|--|--|--|--|--|--|--|--|--|

| No | b       | b++    | b0      | b0++   | Seq | y       | y++    | y*      | y*++   | y0      | y0++   | RevNo |
|----|---------|--------|---------|--------|-----|---------|--------|---------|--------|---------|--------|-------|
| 1  | 72.04   | 36.53  |         |        | A   |         |        |         |        |         |        | 15    |
| 2  | 143.08  | 72.04  |         |        | A   | 1286.69 | 643.85 | 1269.66 | 635.33 | 1268.67 | 634.84 | 14    |
| 3  | 214.12  | 107.56 |         |        | A   | 1215.65 | 608.33 | 1198.62 | 599.81 | 1197.64 | 599.32 | 13    |
| 4  | 311.17  | 156.09 |         |        | P   | 1144.61 | 572.81 | 1127.58 | 564.3  | 1126.6  | 563.8  | 12    |
| 5  | 426.2   | 213.6  | 408.19  | 204.6  | D   | 1047.56 | 524.28 | 1030.53 | 515.77 | 1029.55 | 515.28 | 11    |
| 6  | 525.27  | 263.14 | 507.26  | 254.13 | V   | 932.53  | 466.77 | 915.5   | 458.26 |         |        | 10    |
| 7  | 596.3   | 298.66 | 578.29  | 289.65 | A   | 833.46  | 417.24 | 816.44  | 408.72 |         |        | 9     |
| 8  | 693.36  | 347.18 | 675.35  | 338.18 | P   | 762.43  | 381.72 | 745.4   | 373.2  |         |        | 8     |
| 9  | 764.39  | 382.7  | 746.38  | 373.7  | A   | 665.37  | 333.19 | 648.35  | 324.68 |         |        | 7     |
| 10 | 861.45  | 431.23 | 843.44  | 422.22 | P   | 594.34  | 297.67 | 577.31  | 289.16 |         |        | 6     |
| 11 | 918.47  | 459.74 | 900.46  | 450.73 | G   | 497.28  | 249.15 | 480.26  | 240.63 |         |        | 5     |
| 12 | 1015.52 | 508.26 | 997.51  | 499.26 | P   | 440.26  | 220.63 | 423.24  | 212.12 |         |        | 4     |
| 13 | 1086.56 | 543.78 | 1068.55 | 534.78 | A   | 343.21  | 172.11 | 326.18  | 163.59 |         |        | 3     |
| 14 | 1183.61 | 592.31 | 1165.6  | 583.3  | P   | 272.17  | 136.59 | 255.15  | 128.08 |         |        | 2     |
| 15 |         |        |         |        | R   | 175.12  | 88.06  | 158.09  | 79.55  |         |        | 1     |

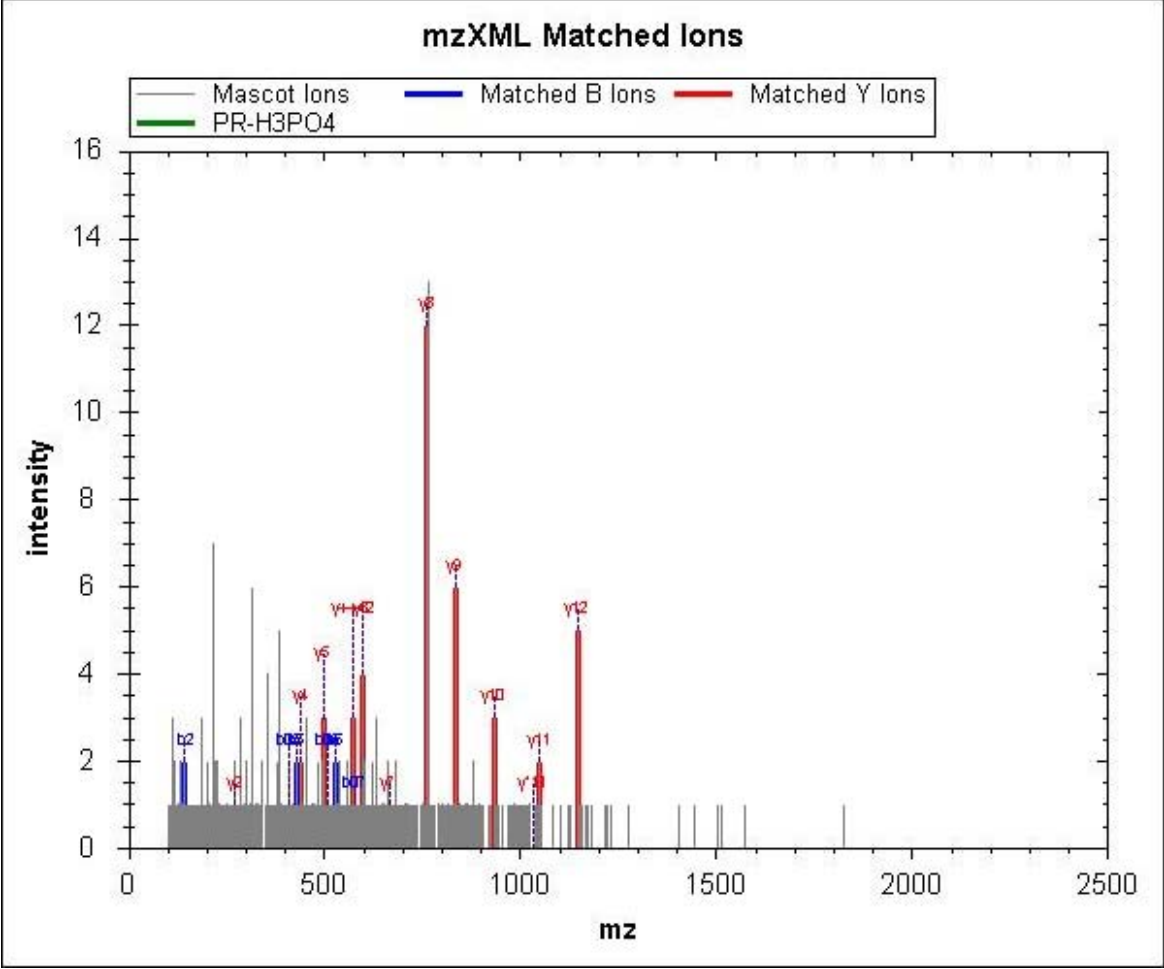

Protein index=243, ACC No:IPI00022585

Peptide index=7231 MS/MS spectrum

Sequence: AAFQIISQVISEATEQVLATTVGK, m/z:835.4625, charge:+ 3, Modification: , Mod Position:

Score: 34.75, Raw data:WET\_A1\_090616\_01.mzxml, MS/MS Elution time: 115.1383, Scan number:6723, Mass delta:0.0125, Rank:1

| No | b       | b++     | b*      | b*++    | b0      | b0++    | Seq | y       | y++     | y*      | y*++    | y0      | y0++    | RevNo |
|----|---------|---------|---------|---------|---------|---------|-----|---------|---------|---------|---------|---------|---------|-------|
| 1  | 72.04   | 36.53   |         |         |         |         | A   |         |         |         |         |         |         | 24    |
| 2  | 143.08  | 72.04   |         |         |         |         | A   | 2433.32 | 1217.17 | 2416.3  | 1208.65 | 2415.31 | 1208.16 | 23    |
| 3  | 290.15  | 145.58  |         |         |         |         | F   | 2362.29 | 1181.65 | 2345.26 | 1173.13 | 2344.28 | 1172.64 | 22    |
| 4  | 418.21  | 209.61  | 401.18  | 201.09  |         |         | Q   | 2215.22 | 1108.11 | 2198.19 | 1099.6  | 2197.21 | 1099.11 | 21    |
| 5  | 531.29  | 266.15  | 514.27  | 257.64  |         |         | I   | 2087.16 | 1044.08 | 2070.13 | 1035.57 | 2069.15 | 1035.08 | 20    |
| 6  | 644.38  | 322.69  | 627.35  | 314.18  |         |         | I   | 1974.08 | 987.54  | 1957.05 | 979.03  | 1956.06 | 978.54  | 19    |
| 7  | 731.41  | 366.21  | 714.38  | 357.69  | 713.4   | 357.2   | S   | 1860.99 | 931     | 1843.96 | 922.49  | 1842.98 | 921.99  | 18    |
| 8  | 859.47  | 430.24  | 842.44  | 421.72  | 841.46  | 421.23  | Q   | 1773.96 | 887.48  | 1756.93 | 878.97  | 1755.95 | 878.48  | 17    |
| 9  | 958.54  | 479.77  | 941.51  | 471.26  | 940.53  | 470.77  | V   | 1645.9  | 823.45  | 1628.87 | 814.94  | 1627.89 | 814.45  | 16    |
| 10 | 1071.62 | 536.31  | 1054.59 | 527.8   | 1053.61 | 527.31  | I   | 1546.83 | 773.92  | 1529.81 | 765.41  | 1528.82 | 764.91  | 15    |
| 11 | 1158.65 | 579.83  | 1141.63 | 571.32  | 1140.64 | 570.82  | S   | 1433.75 | 717.38  | 1416.72 | 708.86  | 1415.74 | 708.37  | 14    |
| 12 | 1287.69 | 644.35  | 1270.67 | 635.84  | 1269.68 | 635.35  | E   | 1346.72 | 673.86  | 1329.69 | 665.35  | 1328.71 | 664.86  | 13    |
| 13 | 1358.73 | 679.87  | 1341.7  | 671.36  | 1340.72 | 670.86  | A   | 1217.67 | 609.34  | 1200.65 | 600.83  | 1199.66 | 600.34  | 12    |
| 14 | 1459.78 | 730.39  | 1442.75 | 721.88  | 1441.77 | 721.39  | T   | 1146.64 | 573.82  | 1129.61 | 565.31  | 1128.63 | 564.82  | 11    |
| 15 | 1588.82 | 794.91  | 1571.8  | 786.4   | 1570.81 | 785.91  | E   | 1045.59 | 523.3   | 1028.56 | 514.78  | 1027.58 | 514.29  | 10    |
| 16 | 1716.88 | 858.94  | 1699.85 | 850.43  | 1698.87 | 849.94  | Q   | 916.55  | 458.78  | 899.52  | 450.26  | 898.54  | 449.77  | 9     |
| 17 | 1815.95 | 908.48  | 1798.92 | 899.96  | 1797.94 | 899.47  | V   | 788.49  | 394.75  | 771.46  | 386.23  | 770.48  | 385.74  | 8     |
| 18 | 1929.03 | 965.02  | 1912.01 | 956.51  | 1911.02 | 956.01  | L   | 689.42  | 345.21  | 672.39  | 336.7   | 671.41  | 336.21  | 7     |
| 19 | 2000.07 | 1000.54 | 1983.04 | 992.03  | 1982.06 | 991.53  | A   | 576.34  | 288.67  | 559.31  | 280.16  | 558.32  | 279.67  | 6     |
| 20 | 2101.12 | 1051.06 | 2084.09 | 1042.55 | 2083.11 | 1042.06 | T   | 505.3   | 253.15  | 488.27  | 244.64  | 487.29  | 244.15  | 5     |
| 21 | 2202.17 | 1101.59 | 2185.14 | 1093.07 | 2184.15 | 1092.58 | T   | 404.25  | 202.63  | 387.22  | 194.12  | 386.24  | 193.62  | 4     |
| 22 | 2301.23 | 1151.12 | 2284.21 | 1142.61 | 2283.22 | 1142.12 | V   | 303.2   | 152.1   | 286.18  | 143.59  |         |         | 3     |
| 23 | 2358.26 | 1179.63 | 2341.23 | 1171.12 | 2340.24 | 1170.63 | G   | 204.13  | 102.57  | 187.11  | 94.06   |         |         | 2     |
| 24 |         |         |         |         |         |         | K   | 147.11  | 74.06   | 130.09  | 65.55   |         |         | 1     |





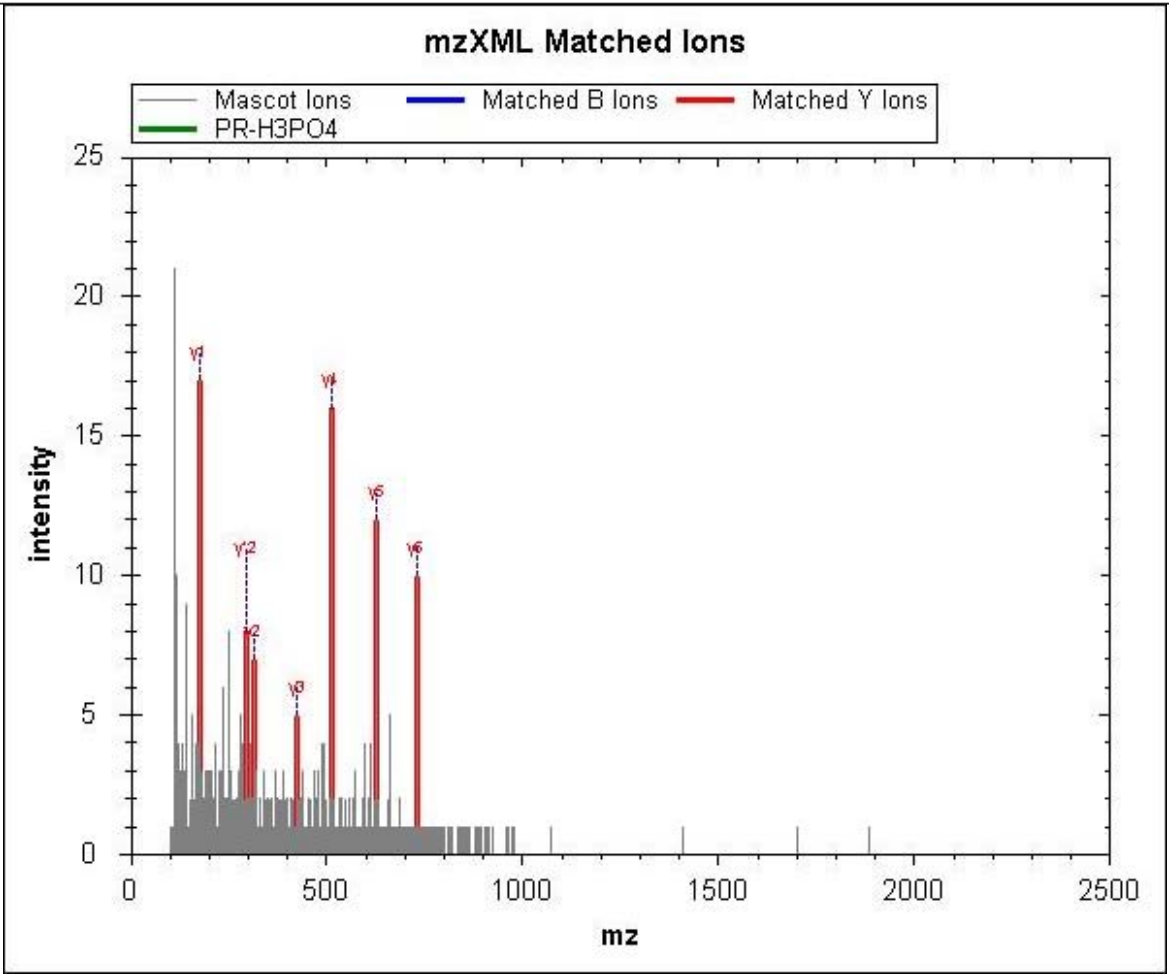

Protein index=254, ACC No:IPI00166996

Peptide index=497 MS/MS spectrum

Sequence: AVTDAIMSR, m/z:490.2501, charge:+ 2, Modification: Oxidation (M), Mod Position: 0.000000100.0

Score: 60.18, Raw data:WET\_B1\_090616\_03.mzxml, MS/MS Elution time: 20.31217, Scan number:949, Mass delta:0.001, Rank:1

| No | b      | b++    | b0     | b0++   | Seq | y      | y++    | y*     | y*++   | y0     | y0++   | RevNo |
|----|--------|--------|--------|--------|-----|--------|--------|--------|--------|--------|--------|-------|
| 1  | 72.04  | 36.53  |        |        | A   |        |        |        |        |        |        | 9     |
| 2  | 171.11 | 86.06  |        |        | V   | 844.45 | 422.73 | 827.43 | 414.22 | 826.44 | 413.72 | 8     |
| 3  | 272.16 | 136.58 | 254.15 | 127.58 | T   | 745.38 | 373.2  | 728.36 | 364.68 | 727.37 | 364.19 | 7     |
| 4  | 387.19 | 194.1  | 369.18 | 185.09 | D   | 644.34 | 322.67 | 627.31 | 314.16 | 626.33 | 313.67 | 6     |
| 5  | 458.22 | 229.62 | 440.21 | 220.61 | A   | 529.31 | 265.16 | 512.28 | 256.64 | 511.3  | 256.15 | 5     |
| 6  | 571.31 | 286.16 | 553.3  | 277.15 | I   | 458.27 | 229.64 | 441.25 | 221.13 | 440.26 | 220.63 | 4     |
| 7  | 654.35 | 327.68 | 636.34 | 318.67 | M   | 345.19 | 173.1  | 328.16 | 164.58 | 327.18 | 164.09 | 3     |
| 8  | 741.38 | 371.19 | 723.37 | 362.19 | S   | 262.15 | 131.58 | 245.12 | 123.07 | 244.14 | 122.57 | 2     |
| 9  |        |        |        |        | R   | 175.12 | 88.06  | 158.09 | 79.55  |        |        | 1     |



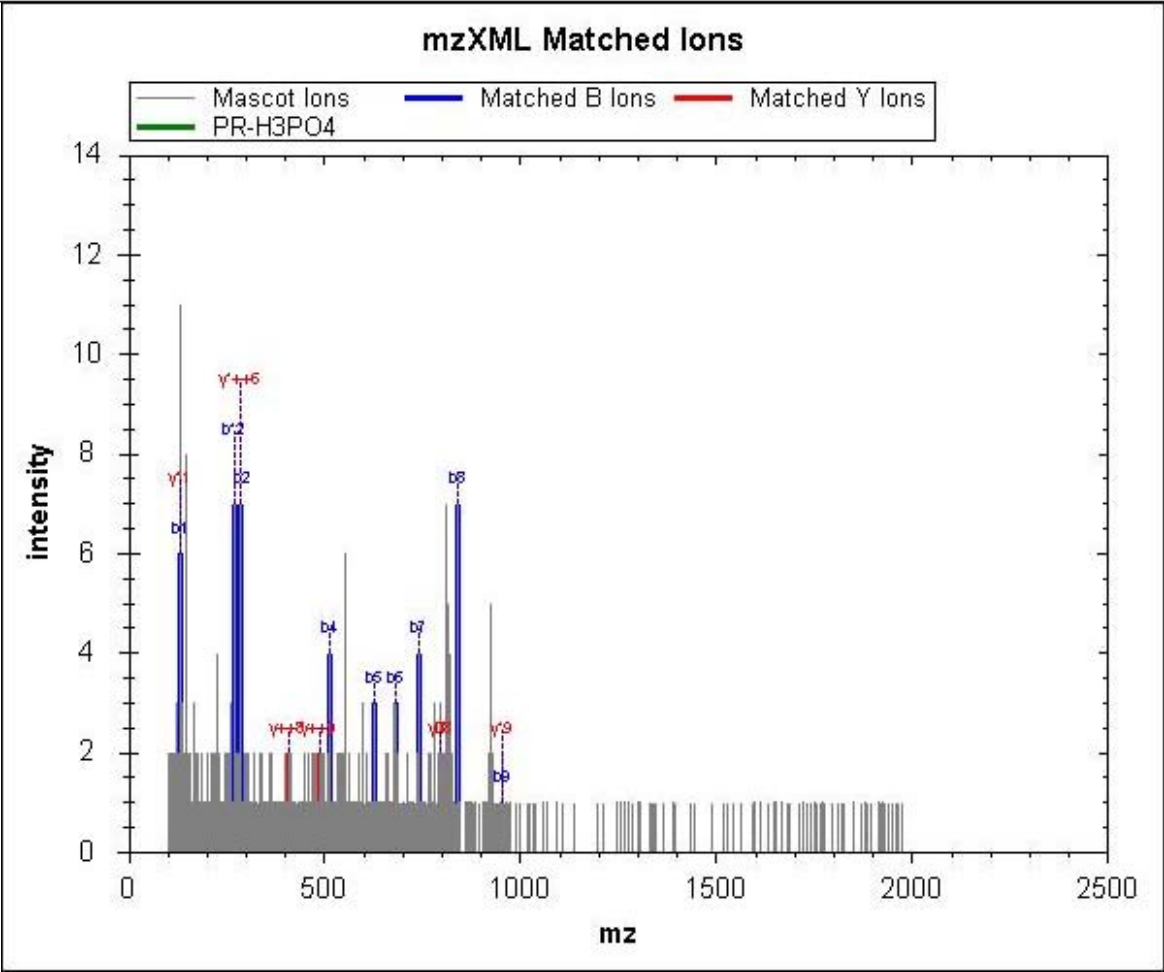

Protein index=265, ACC No:IPI00219678

Peptide index=893 MS/MS spectrum

Sequence: VVTDTDETELAR, m/z:674.8321, charge:+ 2, Modification: , Mod Position:

Score: 89.78, Raw data:WET\_B1\_090616\_02.mzxml, MS/MS Elution time: 26.68967, Scan number:1322, Mass delta:0.0017, Rank:1

| No | b       | b++    | b0      | b0++   | Seq | y       | y++    | y*      | y*++   | y0      | y0++   | RevNo |
|----|---------|--------|---------|--------|-----|---------|--------|---------|--------|---------|--------|-------|
| 1  | 100.08  | 50.54  |         |        | V   |         |        |         |        |         |        | 12    |
| 2  | 199.14  | 100.08 |         |        | V   | 1249.59 | 625.3  | 1232.56 | 616.79 | 1231.58 | 616.29 | 11    |
| 3  | 300.19  | 150.6  | 282.18  | 141.59 | T   | 1150.52 | 575.76 | 1133.5  | 567.25 | 1132.51 | 566.76 | 10    |
| 4  | 415.22  | 208.11 | 397.21  | 199.11 | D   | 1049.47 | 525.24 | 1032.45 | 516.73 | 1031.46 | 516.24 | 9     |
| 5  | 516.27  | 258.64 | 498.26  | 249.63 | T   | 934.45  | 467.73 | 917.42  | 459.21 | 916.44  | 458.72 | 8     |
| 6  | 631.29  | 316.15 | 613.28  | 307.15 | D   | 833.4   | 417.2  | 816.37  | 408.69 | 815.39  | 408.2  | 7     |
| 7  | 760.34  | 380.67 | 742.33  | 371.67 | E   | 718.37  | 359.69 | 701.35  | 351.18 | 700.36  | 350.68 | 6     |
| 8  | 861.38  | 431.2  | 843.37  | 422.19 | T   | 589.33  | 295.17 | 572.3   | 286.66 | 571.32  | 286.16 | 5     |
| 9  | 990.43  | 495.72 | 972.42  | 486.71 | E   | 488.28  | 244.65 | 471.26  | 236.13 | 470.27  | 235.64 | 4     |
| 10 | 1103.51 | 552.26 | 1085.5  | 543.25 | L   | 359.24  | 180.12 | 342.21  | 171.61 |         |        | 3     |
| 11 | 1174.55 | 587.78 | 1156.54 | 578.77 | A   | 246.16  | 123.58 | 229.13  | 115.07 |         |        | 2     |
| 12 |         |        |         |        | R   | 175.12  | 88.06  | 158.09  | 79.55  |         |        | 1     |

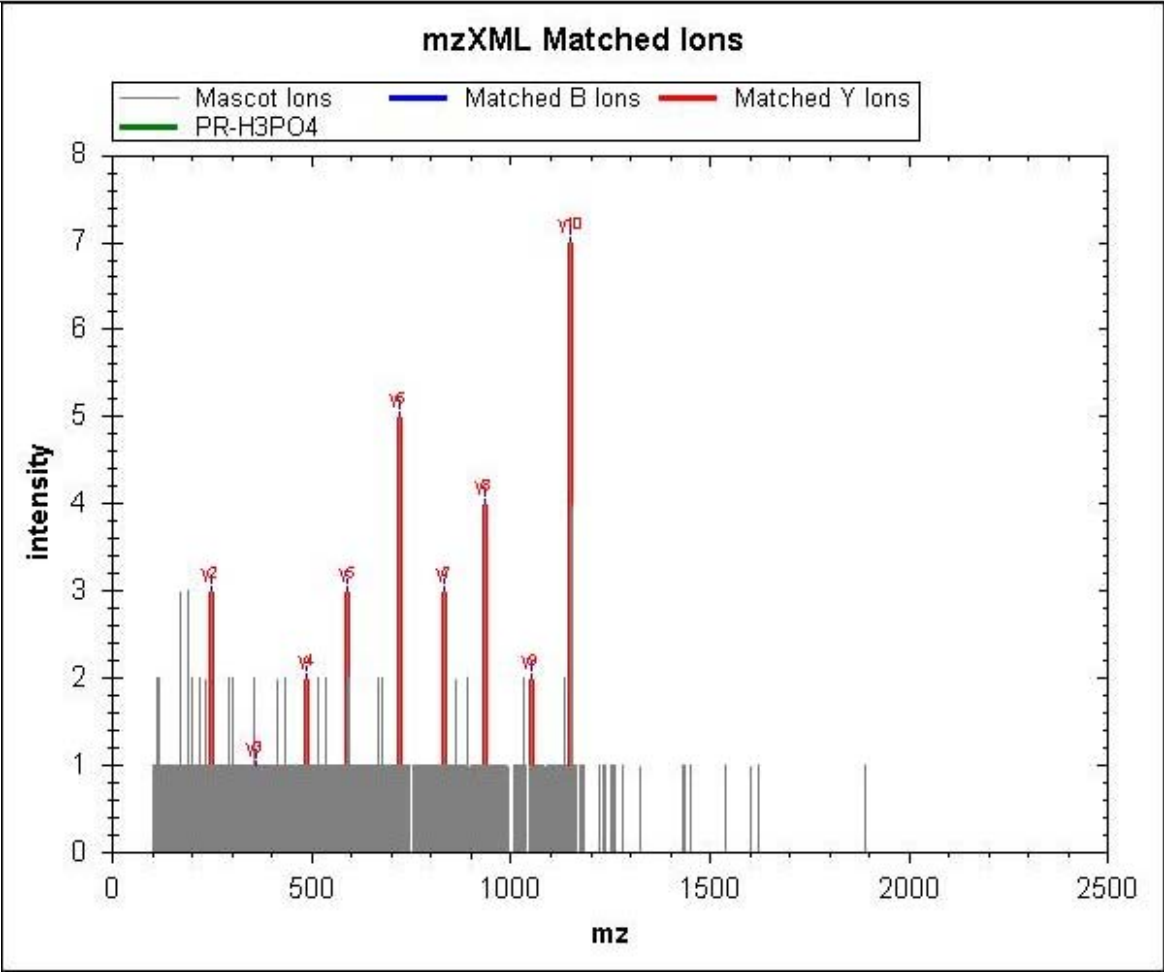

Protein index=269, ACC No:IPI00029629

Peptide index=4893 MS/MS spectrum

Sequence: LPTFGAPEQLVDLK, m/z:764.4245, charge:+ 2, Modification: , Mod Position:

Score: 80.71, Raw data:WET\_A1\_090616\_02.mzxml, MS/MS Elution time: 66.866, Scan number:3680, Mass delta:0, Rank:1

| No | b       | b++    | b*      | b*++   | b0      | b0++   | Seq | y       | y++    | y*      | y*++   | y0      | y0++   | RevNo |
|----|---------|--------|---------|--------|---------|--------|-----|---------|--------|---------|--------|---------|--------|-------|
| 1  | 114.09  | 57.55  |         |        |         |        | L   |         |        |         |        |         |        | 14    |
| 2  | 211.14  | 106.08 |         |        |         |        | P   | 1414.76 | 707.88 | 1397.73 | 699.37 | 1396.75 | 698.88 | 13    |
| 3  | 312.19  | 156.6  |         |        | 294.18  | 147.59 | T   | 1317.7  | 659.36 | 1300.68 | 650.84 | 1299.69 | 650.35 | 12    |
| 4  | 459.26  | 230.13 |         |        | 441.25  | 221.13 | F   | 1216.66 | 608.83 | 1199.63 | 600.32 | 1198.65 | 599.83 | 11    |
| 5  | 516.28  | 258.64 |         |        | 498.27  | 249.64 | G   | 1069.59 | 535.3  | 1052.56 | 526.78 | 1051.58 | 526.29 | 10    |
| 6  | 587.32  | 294.16 |         |        | 569.31  | 285.16 | A   | 1012.57 | 506.79 | 995.54  | 498.27 | 994.56  | 497.78 | 9     |
| 7  | 684.37  | 342.69 |         |        | 666.36  | 333.68 | P   | 941.53  | 471.27 | 924.5   | 462.76 | 923.52  | 462.26 | 8     |
| 8  | 813.41  | 407.21 |         |        | 795.4   | 398.21 | E   | 844.48  | 422.74 | 827.45  | 414.23 | 826.47  | 413.74 | 7     |
| 9  | 941.47  | 471.24 | 924.45  | 462.73 | 923.46  | 462.23 | Q   | 715.43  | 358.22 | 698.41  | 349.71 | 697.42  | 349.22 | 6     |
| 10 | 1054.56 | 527.78 | 1037.53 | 519.27 | 1036.55 | 518.78 | L   | 587.38  | 294.19 | 570.35  | 285.68 | 569.37  | 285.19 | 5     |
| 11 | 1153.63 | 577.32 | 1136.6  | 568.8  | 1135.61 | 568.31 | V   | 474.29  | 237.65 | 457.27  | 229.14 | 456.28  | 228.64 | 4     |
| 12 | 1268.65 | 634.83 | 1251.63 | 626.32 | 1250.64 | 625.82 | D   | 375.22  | 188.12 | 358.2   | 179.6  | 357.21  | 179.11 | 3     |

|    |         |        |         |        |         |        |   |        |       |        |        |  |   |
|----|---------|--------|---------|--------|---------|--------|---|--------|-------|--------|--------|--|---|
| 13 | 1381.74 | 691.37 | 1364.71 | 682.86 | 1363.73 | 682.37 | L | 260.2  | 130.6 | 243.17 | 122.09 |  | 2 |
| 14 |         |        |         |        |         |        | K | 147.11 | 74.06 | 130.09 | 65.55  |  | 1 |

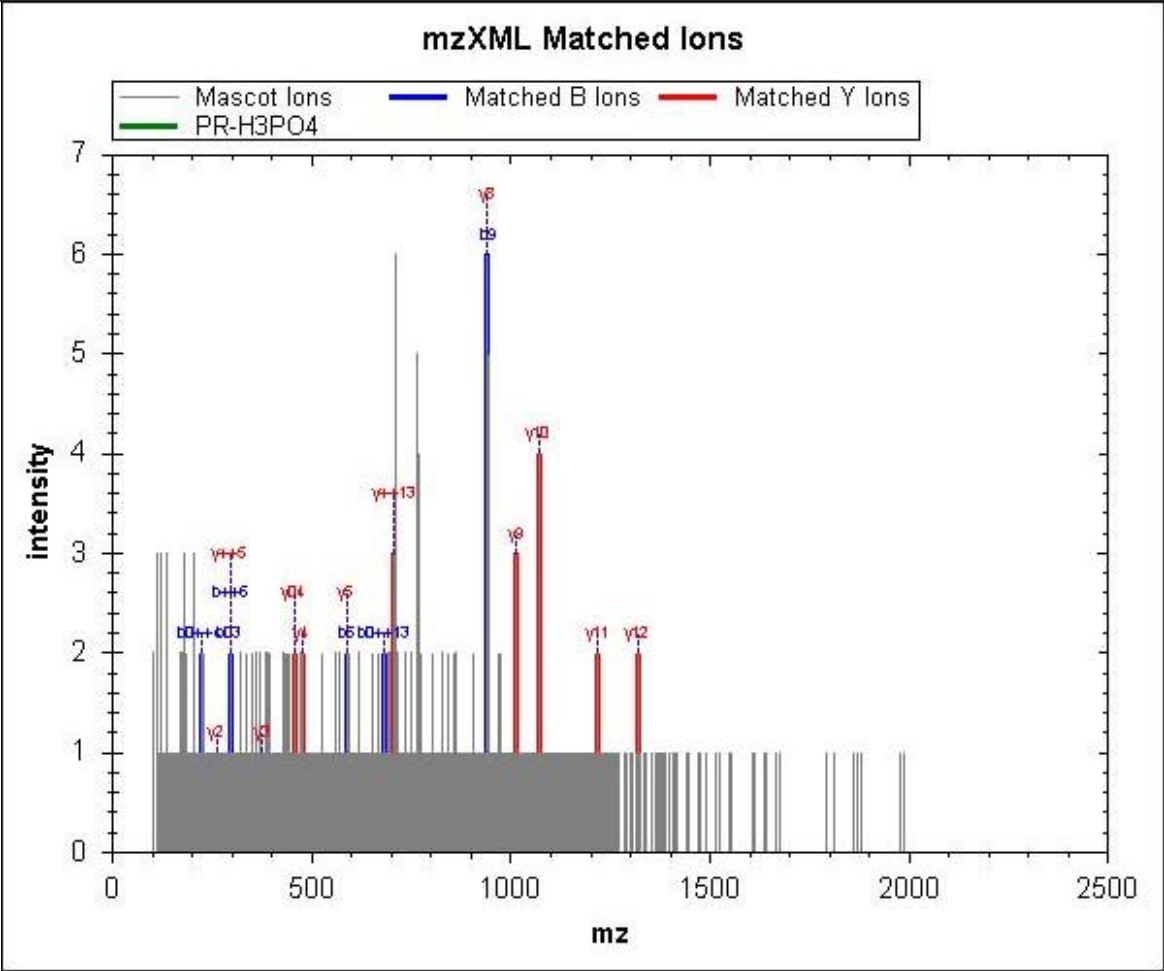

Protein index=270, ACC No:IP100181702

Peptide index=5534 MS/MS spectrum

Sequence: VPGLYVIDSIVR, m/z:665.8903, charge:+ 2, Modification: , Mod Position:

Score: 50.72, Raw data:WET\_A1\_090616\_02.mzxml, MS/MS Elution time: 75.2345, Scan number:4170, Mass delta:0.0003, Rank:1

| No | b       | b++    | b0      | b0++   | Seq | y       | y++    | y*      | y*++   | y0      | y0++   | RevNo |
|----|---------|--------|---------|--------|-----|---------|--------|---------|--------|---------|--------|-------|
| 1  | 100.08  | 50.54  |         |        | V   |         |        |         |        |         |        | 12    |
| 2  | 197.13  | 99.07  |         |        | P   | 1231.7  | 616.36 | 1214.68 | 607.84 | 1213.69 | 607.35 | 11    |
| 3  | 254.15  | 127.58 |         |        | G   | 1134.65 | 567.83 | 1117.63 | 559.32 | 1116.64 | 558.82 | 10    |
| 4  | 367.23  | 184.12 |         |        | L   | 1077.63 | 539.32 | 1060.6  | 530.81 | 1059.62 | 530.31 | 9     |
| 5  | 530.3   | 265.65 |         |        | Y   | 964.55  | 482.78 | 947.52  | 474.26 | 946.54  | 473.77 | 8     |
| 6  | 629.37  | 315.19 |         |        | V   | 801.48  | 401.25 | 784.46  | 392.73 | 783.47  | 392.24 | 7     |
| 7  | 742.45  | 371.73 |         |        | I   | 702.41  | 351.71 | 685.39  | 343.2  | 684.4   | 342.71 | 6     |
| 8  | 857.48  | 429.24 | 839.47  | 420.24 | D   | 589.33  | 295.17 | 572.3   | 286.66 | 571.32  | 286.16 | 5     |
| 9  | 944.51  | 472.76 | 926.5   | 463.75 | S   | 474.3   | 237.66 | 457.28  | 229.14 | 456.29  | 228.65 | 4     |
| 10 | 1057.59 | 529.3  | 1039.58 | 520.29 | I   | 387.27  | 194.14 | 370.24  | 185.63 |         |        | 3     |

|    |         |        |         |        |   |        |       |        |        |  |  |   |
|----|---------|--------|---------|--------|---|--------|-------|--------|--------|--|--|---|
| 11 | 1156.66 | 578.83 | 1138.65 | 569.83 | V | 274.19 | 137.6 | 257.16 | 129.08 |  |  | 2 |
| 12 |         |        |         |        | R | 175.12 | 88.06 | 158.09 | 79.55  |  |  | 1 |

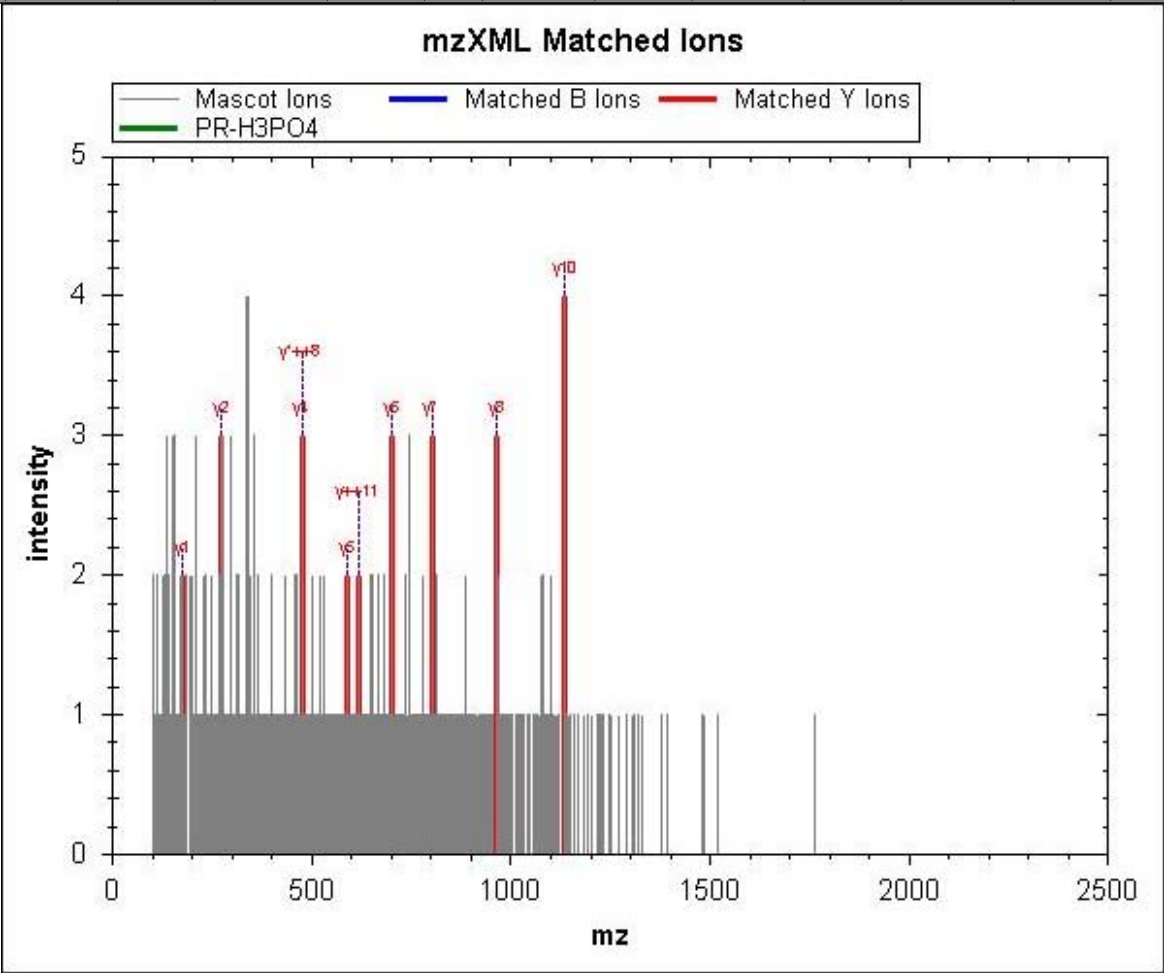

Protein index=272, ACC No: IPI00008453

Peptide index=5459 MS/MS spectrum

Sequence: AIFLADGNVFTTGFSR, m/z: 858.4445, charge: + 2, Modification: , Mod Position:

Score: 75.68, Raw data: WET\_B1\_090616\_01.mzxml, MS/MS Elution time: 73.58884, Scan number: 4041, Mass delta: 0.0005, Rank: 1

| No | b       | b++    | b*      | b*++   | b0      | b0++   | Seq | y       | y++    | y*      | y*++   | y0      | y0++   | RevNo |
|----|---------|--------|---------|--------|---------|--------|-----|---------|--------|---------|--------|---------|--------|-------|
| 1  | 72.04   | 36.53  |         |        |         |        | A   |         |        |         |        |         |        | 16    |
| 2  | 185.13  | 93.07  |         |        |         |        | I   | 1644.84 | 822.92 | 1627.81 | 814.41 | 1626.83 | 813.92 | 15    |
| 3  | 332.2   | 166.6  |         |        |         |        | F   | 1531.75 | 766.38 | 1514.73 | 757.87 | 1513.74 | 757.38 | 14    |
| 4  | 445.28  | 223.14 |         |        |         |        | L   | 1384.69 | 692.85 | 1367.66 | 684.33 | 1366.67 | 683.84 | 13    |
| 5  | 516.32  | 258.66 |         |        |         |        | A   | 1271.6  | 636.3  | 1254.57 | 627.79 | 1253.59 | 627.3  | 12    |
| 6  | 631.34  | 316.18 |         |        | 613.33  | 307.17 | D   | 1200.56 | 600.79 | 1183.54 | 592.27 | 1182.55 | 591.78 | 11    |
| 7  | 688.37  | 344.69 |         |        | 670.36  | 335.68 | G   | 1085.54 | 543.27 | 1068.51 | 534.76 | 1067.53 | 534.27 | 10    |
| 8  | 802.41  | 401.71 | 785.38  | 393.2  | 784.4   | 392.7  | N   | 1028.52 | 514.76 | 1011.49 | 506.25 | 1010.51 | 505.76 | 9     |
| 9  | 901.48  | 451.24 | 884.45  | 442.73 | 883.47  | 442.24 | V   | 914.47  | 457.74 | 897.45  | 449.23 | 896.46  | 448.73 | 8     |
| 10 | 1048.55 | 524.78 | 1031.52 | 516.26 | 1030.54 | 515.77 | F   | 815.4   | 408.21 | 798.38  | 399.69 | 797.39  | 399.2  | 7     |

|    |         |        |         |        |         |        |   |        |        |        |        |        |        |   |
|----|---------|--------|---------|--------|---------|--------|---|--------|--------|--------|--------|--------|--------|---|
| 11 | 1149.59 | 575.3  | 1132.57 | 566.79 | 1131.58 | 566.3  | T | 668.34 | 334.67 | 651.31 | 326.16 | 650.33 | 325.67 | 6 |
| 12 | 1250.64 | 625.82 | 1233.62 | 617.31 | 1232.63 | 616.82 | T | 567.29 | 284.15 | 550.26 | 275.63 | 549.28 | 275.14 | 5 |
| 13 | 1307.66 | 654.34 | 1290.64 | 645.82 | 1289.65 | 645.33 | G | 466.24 | 233.62 | 449.21 | 225.11 | 448.23 | 224.62 | 4 |
| 14 | 1454.73 | 727.87 | 1437.71 | 719.36 | 1436.72 | 718.86 | F | 409.22 | 205.11 | 392.19 | 196.6  | 391.21 | 196.11 | 3 |
| 15 | 1541.76 | 771.39 | 1524.74 | 762.87 | 1523.75 | 762.38 | S | 262.15 | 131.58 | 245.12 | 123.07 | 244.14 | 122.57 | 2 |
| 16 |         |        |         |        |         |        | R | 175.12 | 88.06  | 158.09 | 79.55  |        |        | 1 |

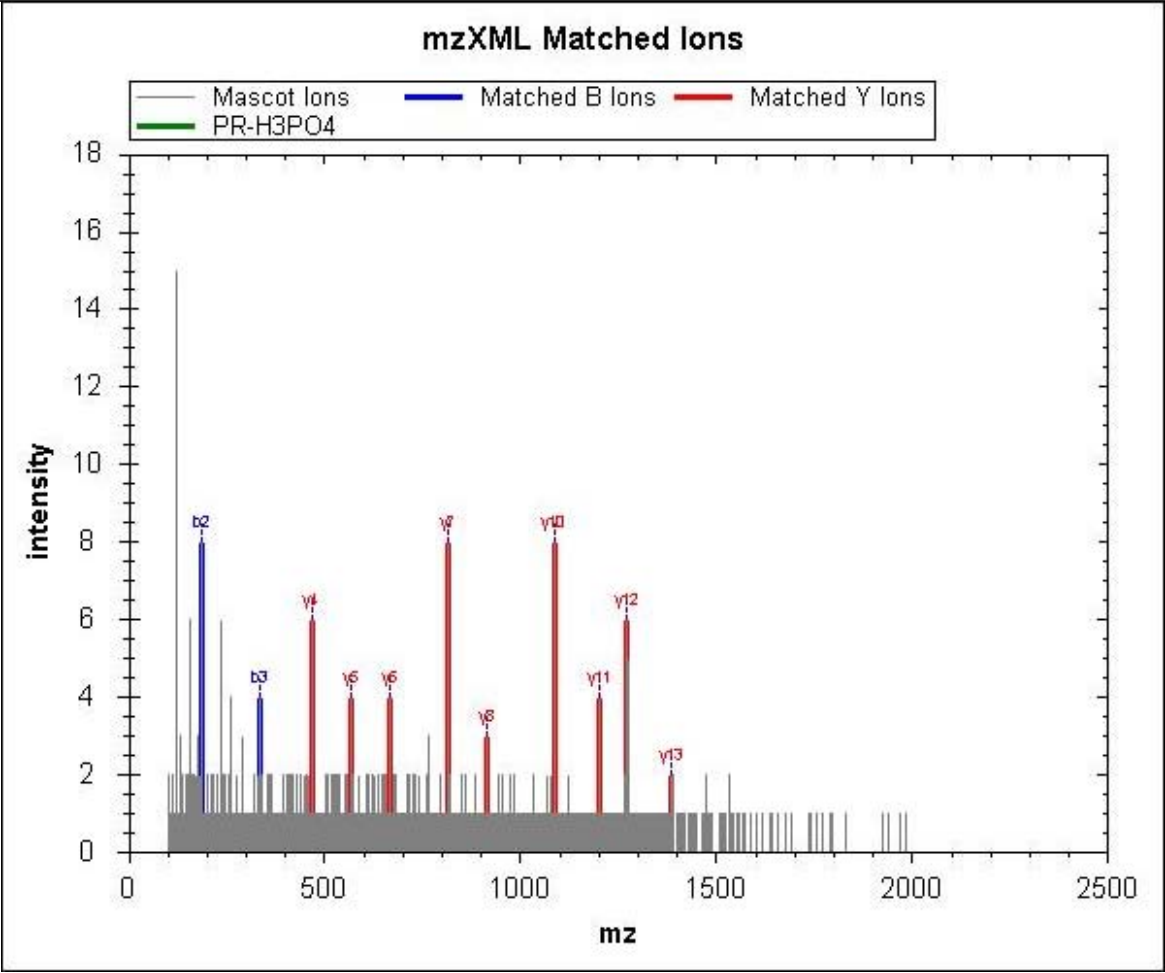

Protein index=275, ACC No:IPI00641829

Peptide index=5146 MS/MS spectrum

Sequence: VAVFFGGLSIK, m/z:569.3379, charge:+ 2, Modification: , Mod Position:

Score: 47.74, Raw data:WET\_B3\_090616\_02.mzxml, MS/MS Elution time: 69.37251, Scan number:3821, Mass delta:-0.0045, Rank:1

| No | b      | b++    | b0 | b0++ | Seq | y      | y++    | y*      | y*++   | y0      | y0++   | RevNo |
|----|--------|--------|----|------|-----|--------|--------|---------|--------|---------|--------|-------|
| 1  | 100.08 | 50.54  |    |      | V   |        |        |         |        |         |        | 11    |
| 2  | 171.11 | 86.06  |    |      | A   | 1038.6 | 519.8  | 1021.57 | 511.29 | 1020.59 | 510.8  | 10    |
| 3  | 270.18 | 135.59 |    |      | V   | 967.56 | 484.28 | 950.53  | 475.77 | 949.55  | 475.28 | 9     |
| 4  | 417.25 | 209.13 |    |      | F   | 868.49 | 434.75 | 851.47  | 426.24 | 850.48  | 425.74 | 8     |
| 5  | 564.32 | 282.66 |    |      | F   | 721.42 | 361.22 | 704.4   | 352.7  | 703.41  | 352.21 | 7     |
| 6  | 621.34 | 311.17 |    |      | G   | 574.36 | 287.68 | 557.33  | 279.17 | 556.35  | 278.68 | 6     |

|    |        |        |        |        |   |        |        |        |        |        |        |   |
|----|--------|--------|--------|--------|---|--------|--------|--------|--------|--------|--------|---|
| 7  | 678.36 | 339.68 |        |        | G | 517.33 | 259.17 | 500.31 | 250.66 | 499.32 | 250.17 | 5 |
| 8  | 791.45 | 396.23 |        |        | L | 460.31 | 230.66 | 443.29 | 222.15 | 442.3  | 221.65 | 4 |
| 9  | 878.48 | 439.74 | 860.47 | 430.74 | S | 347.23 | 174.12 | 330.2  | 165.6  | 329.22 | 165.11 | 3 |
| 10 | 991.56 | 496.28 | 973.55 | 487.28 | I | 260.2  | 130.6  | 243.17 | 122.09 |        |        | 2 |
| 11 |        |        |        |        | K | 147.11 | 74.06  | 130.09 | 65.55  |        |        | 1 |

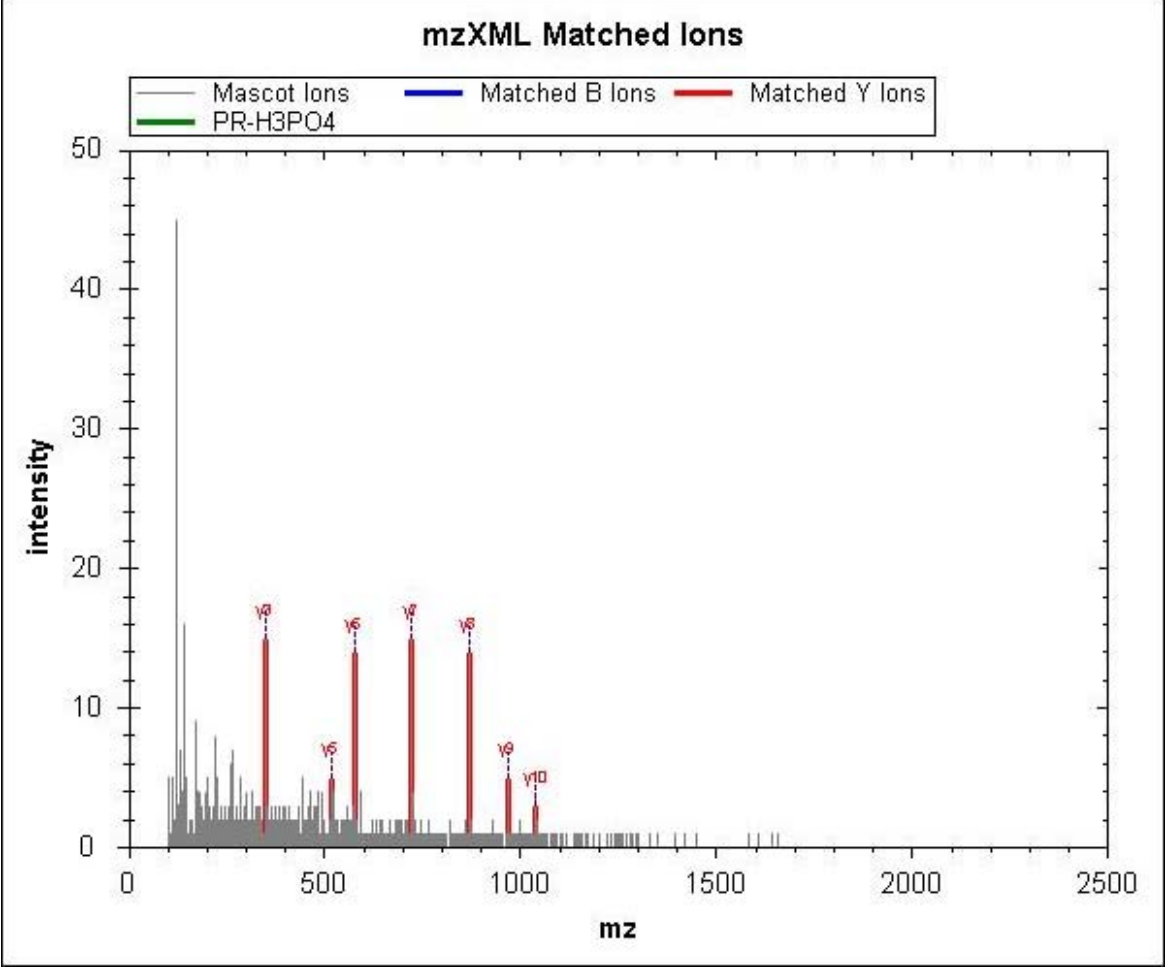

Protein index=279, ACC No:IPI00026054

Peptide index=4567 MS/MS spectrum

Sequence: ARALEAAALAH, m/z:547.3008, charge:+ 2, Modification: , Mod Position:

Score: 50.55, Raw data:WET\_B2\_090616\_01.mzxml, MS/MS Elution time: 63.18983, Scan number:3434, Mass delta:-0.0126, Rank:1

| No | b      | b++    | b*     | b*++   | b0     | b0++   | Seq | y       | y++    | y*      | y*++   | y0      | y0++   | RevNo |
|----|--------|--------|--------|--------|--------|--------|-----|---------|--------|---------|--------|---------|--------|-------|
| 1  | 72.04  | 36.53  |        |        |        |        | A   |         |        |         |        |         |        | 11    |
| 2  | 228.15 | 114.58 | 211.12 | 106.06 |        |        | R   | 1022.57 | 511.79 | 1005.55 | 503.28 | 1004.56 | 502.79 | 10    |
| 3  | 299.18 | 150.09 | 282.16 | 141.58 |        |        | A   | 866.47  | 433.74 |         |        | 848.46  | 424.73 | 9     |
| 4  | 412.27 | 206.64 | 395.24 | 198.12 |        |        | L   | 795.44  | 398.22 |         |        | 777.43  | 389.22 | 8     |
| 5  | 541.31 | 271.16 | 524.28 | 262.64 | 523.3  | 262.15 | E   | 682.35  | 341.68 |         |        | 664.34  | 332.67 | 7     |
| 6  | 612.35 | 306.68 | 595.32 | 298.16 | 594.34 | 297.67 | A   | 553.31  | 277.16 |         |        |         |        | 6     |
| 7  | 683.38 | 342.2  | 666.36 | 333.68 | 665.37 | 333.19 | A   | 482.27  | 241.64 |         |        |         |        | 5     |

|    |        |        |        |        |        |        |   |        |        |  |  |  |  |   |
|----|--------|--------|--------|--------|--------|--------|---|--------|--------|--|--|--|--|---|
| 8  | 754.42 | 377.71 | 737.39 | 369.2  | 736.41 | 368.71 | A | 411.24 | 206.12 |  |  |  |  | 4 |
| 9  | 867.5  | 434.26 | 850.48 | 425.74 | 849.49 | 425.25 | L | 340.2  | 170.6  |  |  |  |  | 3 |
| 10 | 938.54 | 469.77 | 921.52 | 461.26 | 920.53 | 460.77 | A | 227.11 | 114.06 |  |  |  |  | 2 |
| 11 |        |        |        |        |        |        | H | 156.08 | 78.54  |  |  |  |  | 1 |

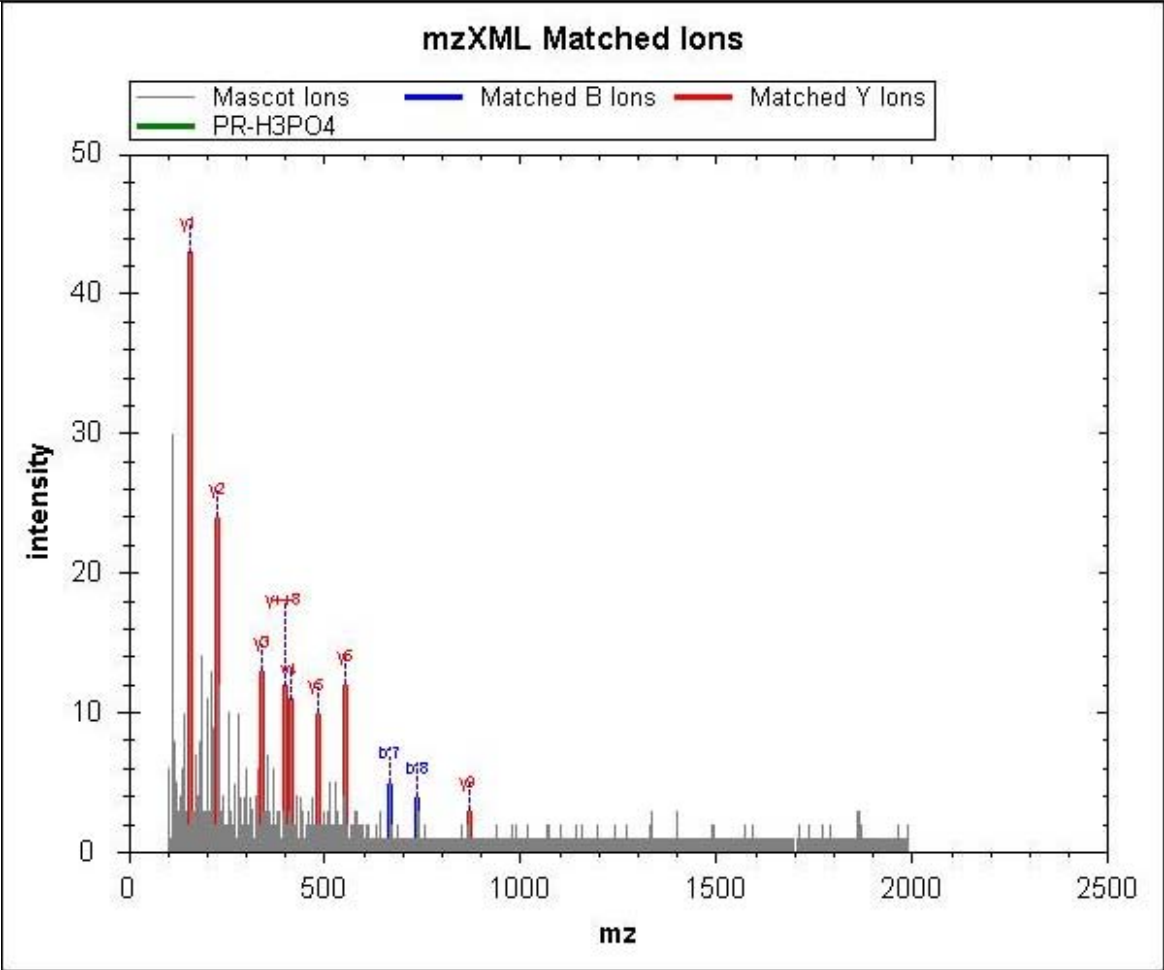

Protein index=282, ACC No:IPI00003965

Peptide index=6840 MS/MS spectrum

Sequence: EVFGTFGIPFLLR, m/z:748.4201, charge:+ 2, Modification: , Mod Position:

Score: 58.02, Raw data:WET\_A1\_090616\_02.mzxml, MS/MS Elution time: 97.74733, Scan number:5493, Mass delta:0.0021, Rank:1

| No | b      | b++    | b0     | b0++   | Seq | y       | y++    | y*      | y*++   | y0      | y0++   | RevNo |
|----|--------|--------|--------|--------|-----|---------|--------|---------|--------|---------|--------|-------|
| 1  | 130.05 | 65.53  | 112.04 | 56.52  | E   |         |        |         |        |         |        | 13    |
| 2  | 229.12 | 115.06 | 211.11 | 106.06 | V   | 1366.79 | 683.9  | 1349.76 | 675.38 | 1348.78 | 674.89 | 12    |
| 3  | 376.19 | 188.6  | 358.18 | 179.59 | F   | 1267.72 | 634.36 | 1250.69 | 625.85 | 1249.71 | 625.36 | 11    |
| 4  | 433.21 | 217.11 | 415.2  | 208.1  | G   | 1120.65 | 560.83 | 1103.62 | 552.32 | 1102.64 | 551.82 | 10    |
| 5  | 534.26 | 267.63 | 516.25 | 258.63 | T   | 1063.63 | 532.32 | 1046.6  | 523.81 | 1045.62 | 523.31 | 9     |
| 6  | 681.32 | 341.17 | 663.31 | 332.16 | F   | 962.58  | 481.79 | 945.56  | 473.28 |         |        | 8     |
| 7  | 738.35 | 369.68 | 720.34 | 360.67 | G   | 815.51  | 408.26 | 798.49  | 399.75 |         |        | 7     |
| 8  | 851.43 | 426.22 | 833.42 | 417.21 | I   | 758.49  | 379.75 | 741.47  | 371.24 |         |        | 6     |

|    |         |        |         |        |   |        |        |        |        |  |  |   |
|----|---------|--------|---------|--------|---|--------|--------|--------|--------|--|--|---|
| 9  | 948.48  | 474.74 | 930.47  | 465.74 | P | 645.41 | 323.21 | 628.38 | 314.69 |  |  | 5 |
| 10 | 1095.55 | 548.28 | 1077.54 | 539.27 | F | 548.36 | 274.68 | 531.33 | 266.17 |  |  | 4 |
| 11 | 1208.64 | 604.82 | 1190.62 | 595.82 | L | 401.29 | 201.15 | 384.26 | 192.63 |  |  | 3 |
| 12 | 1321.72 | 661.36 | 1303.71 | 652.36 | L | 288.2  | 144.61 | 271.18 | 136.09 |  |  | 2 |
| 13 |         |        |         |        | R | 175.12 | 88.06  | 158.09 | 79.55  |  |  | 1 |

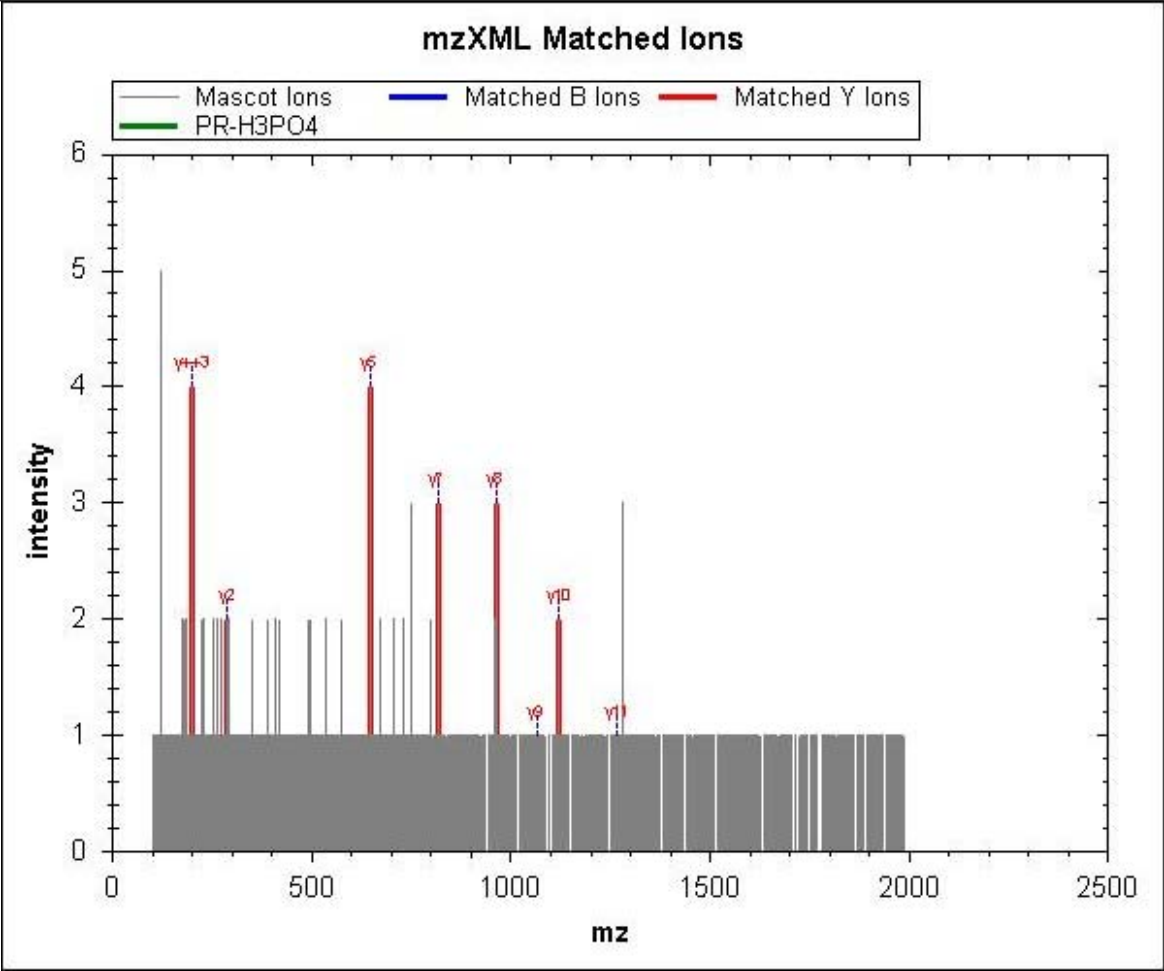

Protein index=284, ACC No:IPI00185919

Peptide index=7063 MS/MS spectrum

Sequence: VQALTTDISLIFAALK, m/z:852.5087, charge:+ 2, Modification: , Mod Position:

Score: 46.11, Raw data:WET\_B1\_090616\_02.mzxml, MS/MS Elution time: 105.178, Scan number:5941, Mass delta:0.0087, Rank:1

| No | b      | b++    | b*     | b*++   | b0     | b0++   | Seq | y       | y++    | y*      | y*++   | y0      | y0++   | RevNo |
|----|--------|--------|--------|--------|--------|--------|-----|---------|--------|---------|--------|---------|--------|-------|
| 1  | 100.08 | 50.54  |        |        |        |        | V   |         |        |         |        |         |        | 16    |
| 2  | 228.13 | 114.57 | 211.11 | 106.06 |        |        | Q   | 1604.93 | 802.97 | 1587.9  | 794.45 | 1586.92 | 793.96 | 15    |
| 3  | 299.17 | 150.09 | 282.14 | 141.58 |        |        | A   | 1476.87 | 738.94 | 1459.84 | 730.42 | 1458.86 | 729.93 | 14    |
| 4  | 412.26 | 206.63 | 395.23 | 198.12 |        |        | L   | 1405.83 | 703.42 | 1388.8  | 694.91 | 1387.82 | 694.41 | 13    |
| 5  | 513.3  | 257.16 | 496.28 | 248.64 | 495.29 | 248.15 | T   | 1292.75 | 646.88 | 1275.72 | 638.36 | 1274.74 | 637.87 | 12    |
| 6  | 614.35 | 307.68 | 597.32 | 299.17 | 596.34 | 298.67 | T   | 1191.7  | 596.35 | 1174.67 | 587.84 | 1173.69 | 587.35 | 11    |
| 7  | 729.38 | 365.19 | 712.35 | 356.68 | 711.37 | 356.19 | D   | 1090.65 | 545.83 | 1073.62 | 537.32 | 1072.64 | 536.82 | 10    |

|    |         |        |         |        |         |        |   |        |        |        |        |        |        |   |
|----|---------|--------|---------|--------|---------|--------|---|--------|--------|--------|--------|--------|--------|---|
| 8  | 842.46  | 421.73 | 825.44  | 413.22 | 824.45  | 412.73 | I | 975.62 | 488.32 | 958.6  | 479.8  | 957.61 | 479.31 | 9 |
| 9  | 929.49  | 465.25 | 912.47  | 456.74 | 911.48  | 456.25 | S | 862.54 | 431.77 | 845.51 | 423.26 | 844.53 | 422.77 | 8 |
| 10 | 1042.58 | 521.79 | 1025.55 | 513.28 | 1024.57 | 512.79 | L | 775.51 | 388.26 | 758.48 | 379.74 |        |        | 7 |
| 11 | 1155.66 | 578.33 | 1138.64 | 569.82 | 1137.65 | 569.33 | I | 662.42 | 331.72 | 645.4  | 323.2  |        |        | 6 |
| 12 | 1302.73 | 651.87 | 1285.7  | 643.36 | 1284.72 | 642.86 | F | 549.34 | 275.17 | 532.31 | 266.66 |        |        | 5 |
| 13 | 1373.77 | 687.39 | 1356.74 | 678.87 | 1355.76 | 678.38 | A | 402.27 | 201.64 | 385.24 | 193.13 |        |        | 4 |
| 14 | 1444.8  | 722.91 | 1427.78 | 714.39 | 1426.79 | 713.9  | A | 331.23 | 166.12 | 314.21 | 157.61 |        |        | 3 |
| 15 | 1557.89 | 779.45 | 1540.86 | 770.93 | 1539.88 | 770.44 | L | 260.2  | 130.6  | 243.17 | 122.09 |        |        | 2 |
| 16 |         |        |         |        |         |        | K | 147.11 | 74.06  | 130.09 | 65.55  |        |        | 1 |

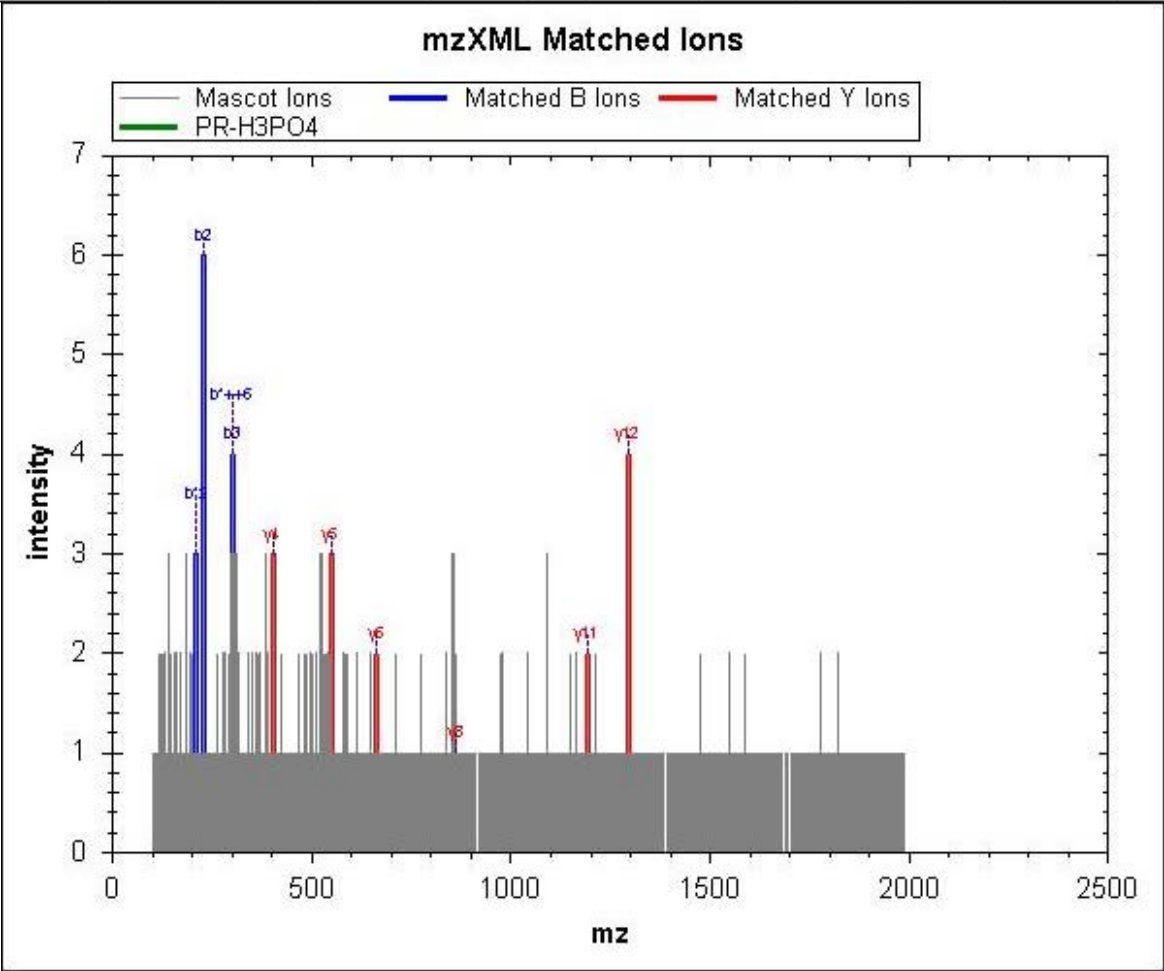

Protein index=285, ACC No:IPI00793585

Peptide index=6806 MS/MS spectrum

Sequence: APFQLTCLEIKMLRR, m/z:612.3217, charge:+ 3, Modification: Oxidation (M), Mod Position: 0.000000000001000.0

Score: 32.65, Raw data:WET\_A1\_090616\_02.mzxml, MS/MS Elution time: 96.54166, Scan number:5417, Mass delta:-0.0523, Rank:1

| No | b     | b++   | b* | b*++ | b0 | b0++ | Seq | y       | y++    | y*      | y*++   | y0      | y0++   | RevNo |
|----|-------|-------|----|------|----|------|-----|---------|--------|---------|--------|---------|--------|-------|
| 1  | 72.04 | 36.53 |    |      |    |      | A   |         |        |         |        |         |        | 15    |
| 2  | 169.1 | 85.05 |    |      |    |      | P   | 1763.97 | 882.49 | 1746.94 | 873.97 | 1745.96 | 873.48 | 14    |

|    |         |        |         |        |         |        |  |   |         |        |         |        |         |        |    |
|----|---------|--------|---------|--------|---------|--------|--|---|---------|--------|---------|--------|---------|--------|----|
| 3  | 316.17  | 158.59 |         |        |         |        |  | F | 1666.91 | 833.96 | 1649.89 | 825.45 | 1648.9  | 824.95 | 13 |
| 4  | 444.22  | 222.62 | 427.2   | 214.1  |         |        |  | Q | 1519.84 | 760.43 | 1502.82 | 751.91 | 1501.83 | 751.42 | 12 |
| 5  | 557.31  | 279.16 | 540.28  | 270.64 |         |        |  | L | 1391.79 | 696.4  | 1374.76 | 687.88 | 1373.78 | 687.39 | 11 |
| 6  | 658.36  | 329.68 | 641.33  | 321.17 | 640.35  | 320.68 |  | T | 1278.7  | 639.85 | 1261.68 | 631.34 | 1260.69 | 630.85 | 10 |
| 7  | 761.37  | 381.19 | 744.34  | 372.67 | 743.35  | 372.18 |  | C | 1177.65 | 589.33 | 1160.63 | 580.82 | 1159.64 | 580.33 | 9  |
| 8  | 874.45  | 437.73 | 857.42  | 429.21 | 856.44  | 428.72 |  | L | 1074.65 | 537.83 | 1057.62 | 529.31 | 1056.63 | 528.82 | 8  |
| 9  | 1003.49 | 502.25 | 986.47  | 493.74 | 985.48  | 493.24 |  | E | 961.56  | 481.28 | 944.53  | 472.77 | 943.55  | 472.28 | 7  |
| 10 | 1116.58 | 558.79 | 1099.55 | 550.28 | 1098.57 | 549.79 |  | I | 832.52  | 416.76 | 815.49  | 408.25 |         |        | 6  |
| 11 | 1244.67 | 622.84 | 1227.64 | 614.33 | 1226.66 | 613.83 |  | K | 719.43  | 360.22 | 702.41  | 351.71 |         |        | 5  |
| 12 | 1391.71 | 696.36 | 1374.68 | 687.84 | 1373.7  | 687.35 |  | M | 591.34  | 296.17 | 574.31  | 287.66 |         |        | 4  |
| 13 | 1504.79 | 752.9  | 1487.76 | 744.39 | 1486.78 | 743.89 |  | L | 444.3   | 222.66 | 427.28  | 214.14 |         |        | 3  |
| 14 | 1660.89 | 830.95 | 1643.86 | 822.44 | 1642.88 | 821.94 |  | R | 331.22  | 166.11 | 314.19  | 157.6  |         |        | 2  |
| 15 |         |        |         |        |         |        |  | R | 175.12  | 88.06  | 158.09  | 79.55  |         |        | 1  |

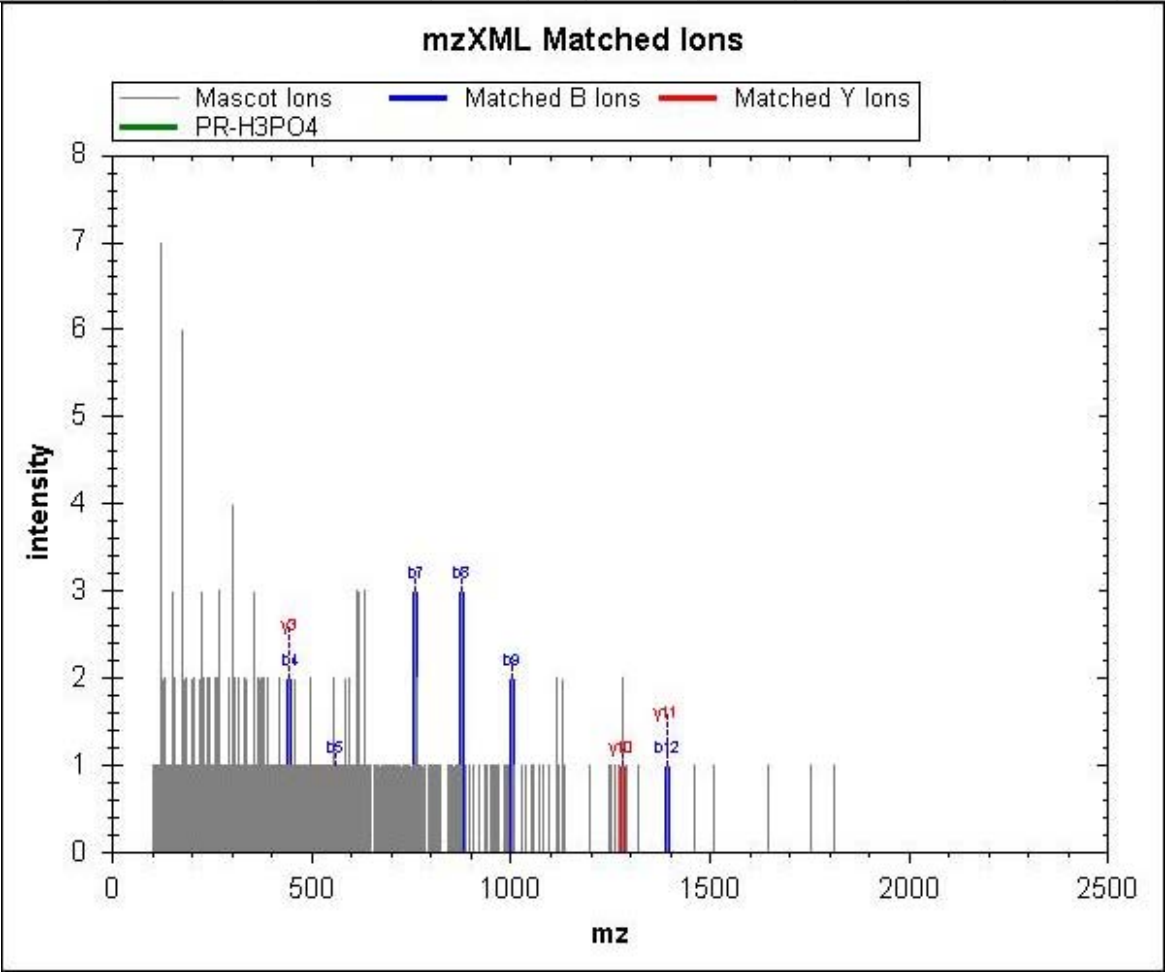

Protein index=286, ACC No:IP100027415

Peptide index=495 MS/MS spectrum

Sequence: ISAISVAER, m/z:473.2688, charge:+ 2, Modification: , Mod Position:

Score: 33.08, Raw data:WET\_A1\_090616\_02.mzxml, MS/MS Elution time: 20.22033, Scan number:944, Mass delta:-0.006, Rank:1

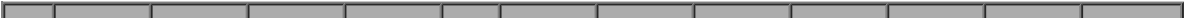

| No | b      | b++    | b0     | b0++   | Seq | y      | y++    | y*     | y*++   | y0     | y0++   | RevNo |
|----|--------|--------|--------|--------|-----|--------|--------|--------|--------|--------|--------|-------|
| 1  | 114.09 | 57.55  |        |        | I   |        |        |        |        |        |        | 9     |
| 2  | 201.12 | 101.07 | 183.11 | 92.06  | S   | 832.45 | 416.73 | 815.43 | 408.22 | 814.44 | 407.72 | 8     |
| 3  | 272.16 | 136.58 | 254.15 | 127.58 | A   | 745.42 | 373.21 | 728.39 | 364.7  | 727.41 | 364.21 | 7     |
| 4  | 385.24 | 193.13 | 367.23 | 184.12 | I   | 674.38 | 337.7  | 657.36 | 329.18 | 656.37 | 328.69 | 6     |
| 5  | 472.28 | 236.64 | 454.27 | 227.64 | S   | 561.3  | 281.15 | 544.27 | 272.64 | 543.29 | 272.15 | 5     |
| 6  | 571.34 | 286.18 | 553.33 | 277.17 | V   | 474.27 | 237.64 | 457.24 | 229.12 | 456.26 | 228.63 | 4     |
| 7  | 642.38 | 321.69 | 624.37 | 312.69 | A   | 375.2  | 188.1  | 358.17 | 179.59 | 357.19 | 179.1  | 3     |
| 8  | 771.42 | 386.22 | 753.41 | 377.21 | E   | 304.16 | 152.58 | 287.13 | 144.07 | 286.15 | 143.58 | 2     |
| 9  |        |        |        |        | R   | 175.12 | 88.06  | 158.09 | 79.55  |        |        | 1     |

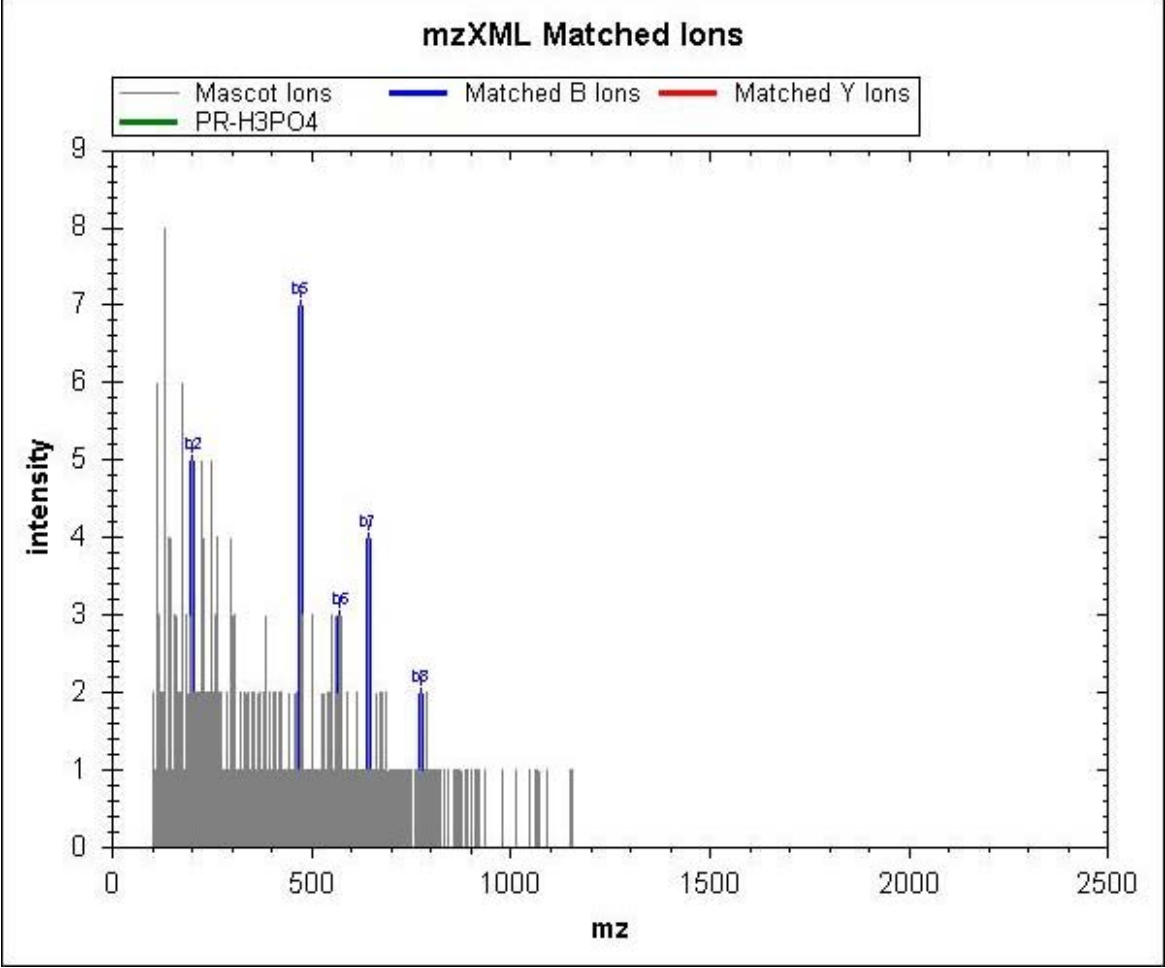

Protein index=287, ACC No:IPI00152240

Peptide index=6188 MS/MS spectrum

Sequence: TGLLGIFWK, m/z:517.8104, charge:+ 2, Modification: , Mod Position:

Score: 34.04, Raw data:WET\_A1\_090616\_03.mzxml, MS/MS Elution time: 84.00117, Scan number:4656, Mass delta:-0.0043, Rank:1

| No | b      | b++   | b0     | b0++  | Seq | y      | y++    | y*     | y*++   | RevNo |
|----|--------|-------|--------|-------|-----|--------|--------|--------|--------|-------|
| 1  | 102.05 | 51.53 | 84.04  | 42.53 | T   |        |        |        |        | 9     |
| 2  | 159.08 | 80.04 | 141.07 | 71.04 | G   | 933.56 | 467.28 | 916.53 | 458.77 | 8     |

|   |        |        |        |        |   |        |        |        |        |   |
|---|--------|--------|--------|--------|---|--------|--------|--------|--------|---|
| 3 | 272.16 | 136.58 | 254.15 | 127.58 | L | 876.53 | 438.77 | 859.51 | 430.26 | 7 |
| 4 | 385.24 | 193.13 | 367.23 | 184.12 | L | 763.45 | 382.23 | 746.42 | 373.72 | 6 |
| 5 | 442.27 | 221.64 | 424.26 | 212.63 | G | 650.37 | 325.69 | 633.34 | 317.17 | 5 |
| 6 | 555.35 | 278.18 | 537.34 | 269.17 | I | 593.34 | 297.18 | 576.32 | 288.66 | 4 |
| 7 | 702.42 | 351.71 | 684.41 | 342.71 | F | 480.26 | 240.63 | 463.23 | 232.12 | 3 |
| 8 | 888.5  | 444.75 | 870.49 | 435.75 | W | 333.19 | 167.1  | 316.17 | 158.59 | 2 |
| 9 |        |        |        |        | K | 147.11 | 74.06  | 130.09 | 65.55  | 1 |

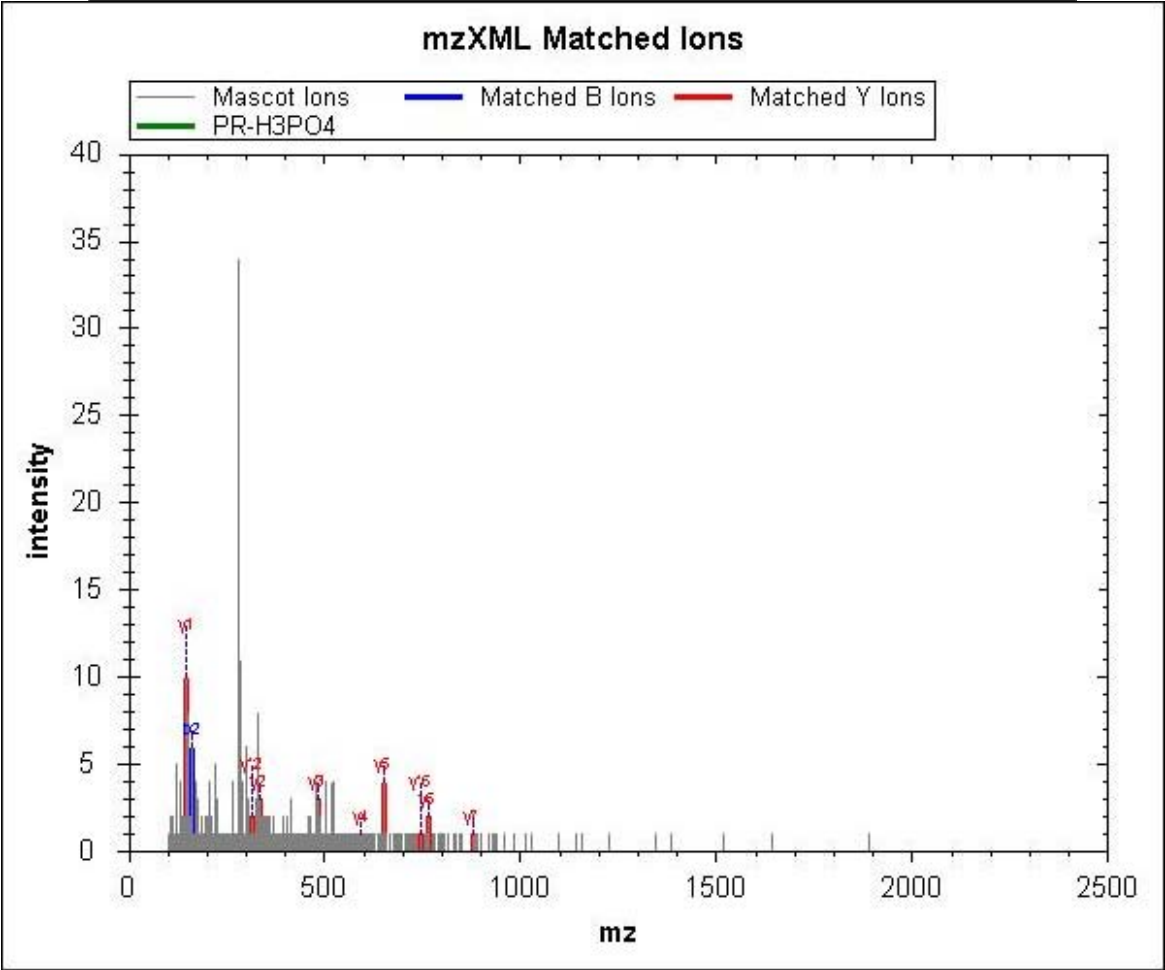

Protein index=288, ACC No:IPI00217630

Peptide index=6853 MS/MS spectrum

Sequence: SVYTDILIGLLSR, m/z:725.4298, charge:+ 2, Modification: , Mod Position:

Score: 68.3, Raw data:WET\_B1\_090616\_01.mzxml, MS/MS Elution time: 97.91267, Scan number:5455, Mass delta:0.0051, Rank:1

| No | b      | b++    | b0     | b0++   | Seq | y       | y++    | y*      | y*++   | y0      | y0++   | RevNo |
|----|--------|--------|--------|--------|-----|---------|--------|---------|--------|---------|--------|-------|
| 1  | 88.04  | 44.52  | 70.03  | 35.52  | S   |         |        |         |        |         |        | 13    |
| 2  | 187.11 | 94.06  | 169.1  | 85.05  | V   | 1362.8  | 681.9  | 1345.77 | 673.39 | 1344.79 | 672.9  | 12    |
| 3  | 350.17 | 175.59 | 332.16 | 166.58 | Y   | 1263.73 | 632.37 | 1246.7  | 623.86 | 1245.72 | 623.36 | 11    |
| 4  | 451.22 | 226.11 | 433.21 | 217.11 | T   | 1100.67 | 550.84 | 1083.64 | 542.32 | 1082.66 | 541.83 | 10    |
| 5  | 566.25 | 283.63 | 548.24 | 274.62 | D   | 999.62  | 500.31 | 982.59  | 491.8  | 981.61  | 491.31 | 9     |

|    |         |        |         |        |   |        |        |        |        |        |        |   |
|----|---------|--------|---------|--------|---|--------|--------|--------|--------|--------|--------|---|
| 6  | 679.33  | 340.17 | 661.32  | 331.16 | I | 884.59 | 442.8  | 867.57 | 434.29 | 866.58 | 433.79 | 8 |
| 7  | 792.41  | 396.71 | 774.4   | 387.71 | L | 771.51 | 386.26 | 754.48 | 377.74 | 753.5  | 377.25 | 7 |
| 8  | 905.5   | 453.25 | 887.49  | 444.25 | I | 658.42 | 329.72 | 641.4  | 321.2  | 640.41 | 320.71 | 6 |
| 9  | 962.52  | 481.76 | 944.51  | 472.76 | G | 545.34 | 273.17 | 528.31 | 264.66 | 527.33 | 264.17 | 5 |
| 10 | 1075.6  | 538.31 | 1057.59 | 529.3  | L | 488.32 | 244.66 | 471.29 | 236.15 | 470.31 | 235.66 | 4 |
| 11 | 1188.69 | 594.85 | 1170.68 | 585.84 | L | 375.24 | 188.12 | 358.21 | 179.61 | 357.22 | 179.12 | 3 |
| 12 | 1275.72 | 638.36 | 1257.71 | 629.36 | S | 262.15 | 131.58 | 245.12 | 123.07 | 244.14 | 122.57 | 2 |
| 13 |         |        |         |        | R | 175.12 | 88.06  | 158.09 | 79.55  |        |        | 1 |

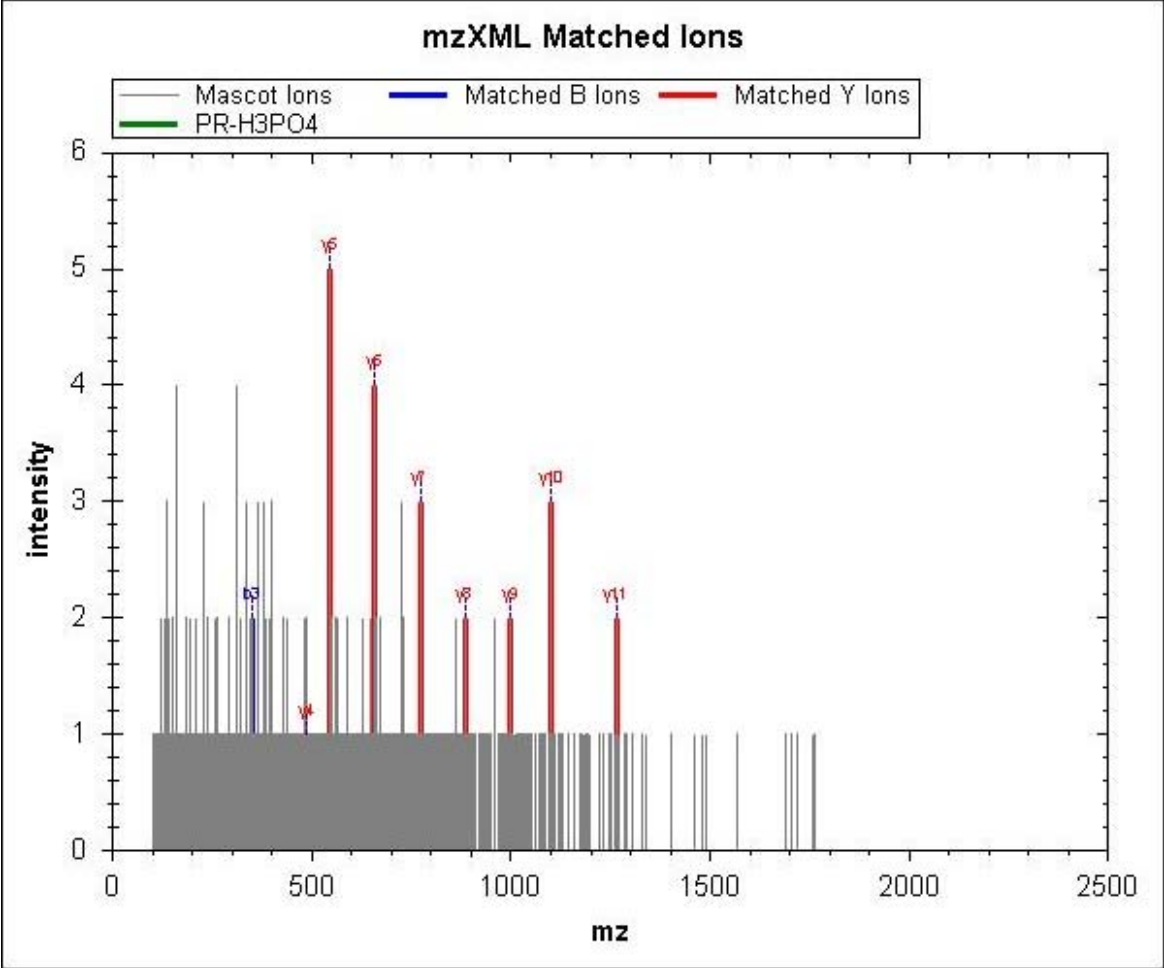

Protein index=291, ACC No:IPI00060523

Peptide index=6700 MS/MS spectrum

Sequence: LLHPALPLLGLATLTFR, m/z:616.0291, charge:+ 3, Modification: , Mod Position:

Score: 69.34, Raw data:WET\_B1\_090616\_03.mzxml, MS/MS Elution time: 94.00967, Scan number:5265, Mass delta:-0.0059, Rank:1

| No | b      | b++    | b0 | b0++ | Seq | y       | y++    | y*      | y*++   | y0      | y0++   | RevNo |
|----|--------|--------|----|------|-----|---------|--------|---------|--------|---------|--------|-------|
| 1  | 114.09 | 57.55  |    |      | L   |         |        |         |        |         |        | 17    |
| 2  | 227.18 | 114.09 |    |      | L   | 1733.05 | 867.03 | 1716.02 | 858.51 | 1715.04 | 858.02 | 16    |
| 3  | 364.23 | 182.62 |    |      | H   | 1619.96 | 810.49 | 1602.94 | 801.97 | 1601.95 | 801.48 | 15    |
| 4  | 461.29 | 231.15 |    |      | P   | 1482.9  | 741.96 | 1465.88 | 733.44 | 1464.89 | 732.95 | 14    |

|    |         |        |         |        |   |         |        |         |        |         |        |    |
|----|---------|--------|---------|--------|---|---------|--------|---------|--------|---------|--------|----|
| 5  | 532.32  | 266.67 |         |        | A | 1385.85 | 693.43 | 1368.82 | 684.92 | 1367.84 | 684.42 | 13 |
| 6  | 645.41  | 323.21 |         |        | L | 1314.81 | 657.91 | 1297.79 | 649.4  | 1296.8  | 648.91 | 12 |
| 7  | 742.46  | 371.73 |         |        | P | 1201.73 | 601.37 | 1184.7  | 592.86 | 1183.72 | 592.36 | 11 |
| 8  | 855.55  | 428.28 |         |        | L | 1104.68 | 552.84 | 1087.65 | 544.33 | 1086.67 | 543.84 | 10 |
| 9  | 968.63  | 484.82 |         |        | L | 991.59  | 496.3  | 974.57  | 487.79 | 973.58  | 487.3  | 9  |
| 10 | 1081.71 | 541.36 |         |        | L | 878.51  | 439.76 | 861.48  | 431.25 | 860.5   | 430.75 | 8  |
| 11 | 1138.73 | 569.87 |         |        | G | 765.43  | 383.22 | 748.4   | 374.7  | 747.41  | 374.21 | 7  |
| 12 | 1209.77 | 605.39 |         |        | A | 708.4   | 354.71 | 691.38  | 346.19 | 690.39  | 345.7  | 6  |
| 13 | 1310.82 | 655.91 | 1292.81 | 646.91 | T | 637.37  | 319.19 | 620.34  | 310.67 | 619.36  | 310.18 | 5  |
| 14 | 1423.9  | 712.46 | 1405.89 | 703.45 | L | 536.32  | 268.66 | 519.29  | 260.15 | 518.31  | 259.66 | 4  |
| 15 | 1524.95 | 762.98 | 1506.94 | 753.97 | T | 423.24  | 212.12 | 406.21  | 203.61 | 405.22  | 203.12 | 3  |
| 16 | 1672.02 | 836.51 | 1654.01 | 827.51 | F | 322.19  | 161.6  | 305.16  | 153.08 |         |        | 2  |
| 17 |         |        |         |        | R | 175.12  | 88.06  | 158.09  | 79.55  |         |        | 1  |

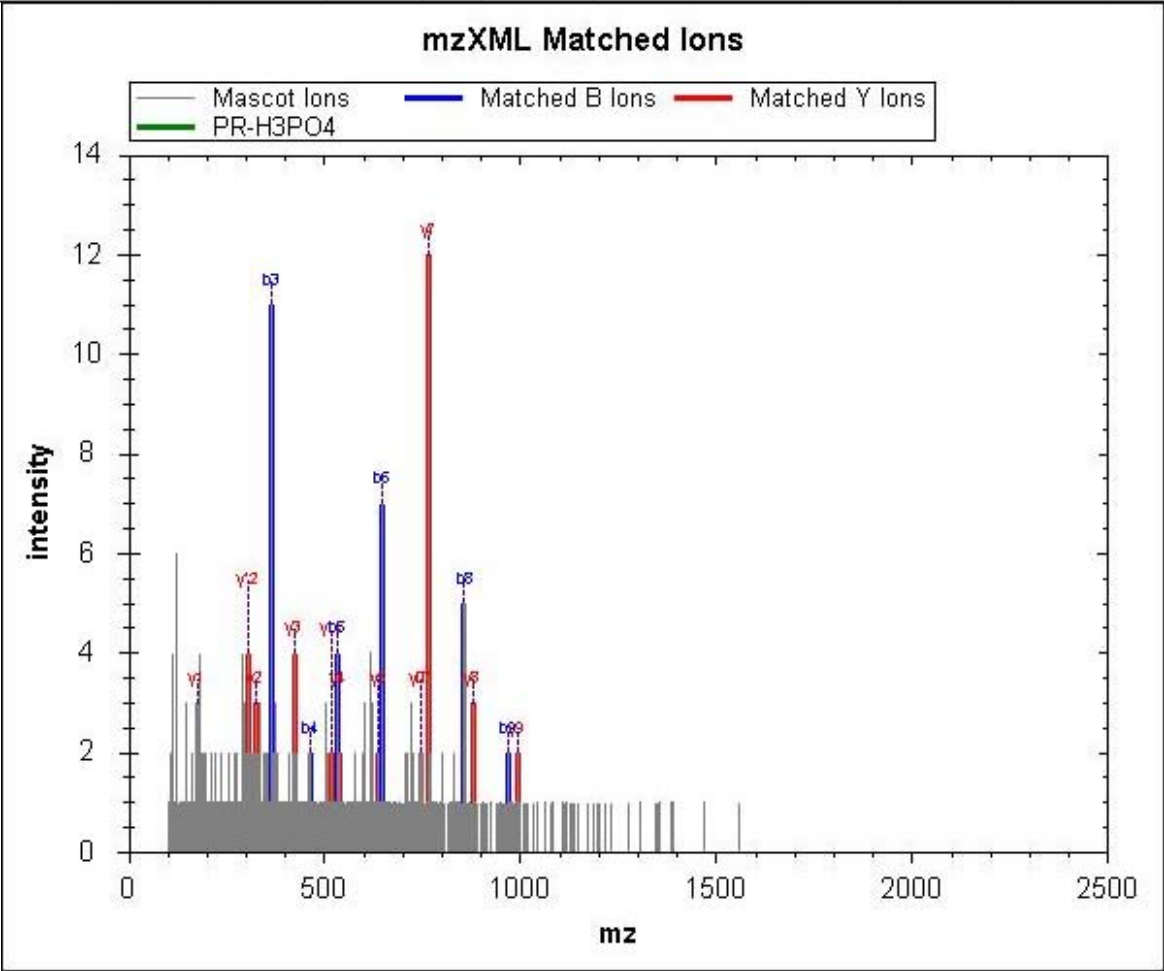

Protein index=292, ACC No:IP100414168

Peptide index=2039 MS/MS spectrum

Sequence: IPAEANPLADHVSATR, m/z:554.6253, charge:+ 3, Modification: , Mod Position:

Score: 56.85, Raw data:WET\_A1\_090616\_02.mzxml, MS/MS Elution time: 40.19183, Scan number:2118, Mass delta:0.0007, Rank:1

| No | b       | b++    | b*      | b*++   | b0      | b0++   | Seq | y       | y++    | y*      | y*++   | y0      | y0++   | RevNo |
|----|---------|--------|---------|--------|---------|--------|-----|---------|--------|---------|--------|---------|--------|-------|
| 1  | 114.09  | 57.55  |         |        |         |        | I   |         |        |         |        |         |        | 16    |
| 2  | 211.14  | 106.08 |         |        |         |        | P   | 1548.78 | 774.89 | 1531.75 | 766.38 | 1530.77 | 765.89 | 15    |
| 3  | 282.18  | 141.59 |         |        |         |        | A   | 1451.72 | 726.37 | 1434.7  | 717.85 | 1433.71 | 717.36 | 14    |
| 4  | 411.22  | 206.12 |         |        | 393.21  | 197.11 | E   | 1380.69 | 690.85 | 1363.66 | 682.33 | 1362.68 | 681.84 | 13    |
| 5  | 482.26  | 241.63 |         |        | 464.25  | 232.63 | A   | 1251.64 | 626.33 | 1234.62 | 617.81 | 1233.63 | 617.32 | 12    |
| 6  | 596.3   | 298.66 | 579.28  | 290.14 | 578.29  | 289.65 | N   | 1180.61 | 590.81 | 1163.58 | 582.29 | 1162.6  | 581.8  | 11    |
| 7  | 693.36  | 347.18 | 676.33  | 338.67 | 675.35  | 338.18 | P   | 1066.56 | 533.79 | 1049.54 | 525.27 | 1048.55 | 524.78 | 10    |
| 8  | 806.44  | 403.72 | 789.41  | 395.21 | 788.43  | 394.72 | L   | 969.51  | 485.26 | 952.48  | 476.75 | 951.5   | 476.25 | 9     |
| 9  | 877.48  | 439.24 | 860.45  | 430.73 | 859.47  | 430.24 | A   | 856.43  | 428.72 | 839.4   | 420.2  | 838.42  | 419.71 | 8     |
| 10 | 992.5   | 496.76 | 975.48  | 488.24 | 974.49  | 487.75 | D   | 785.39  | 393.2  | 768.36  | 384.69 | 767.38  | 384.19 | 7     |
| 11 | 1129.56 | 565.29 | 1112.54 | 556.77 | 1111.55 | 556.28 | H   | 670.36  | 335.69 | 653.34  | 327.17 | 652.35  | 326.68 | 6     |
| 12 | 1228.63 | 614.82 | 1211.61 | 606.31 | 1210.62 | 605.81 | V   | 533.3   | 267.16 | 516.28  | 258.64 | 515.29  | 258.15 | 5     |
| 13 | 1315.66 | 658.34 | 1298.64 | 649.82 | 1297.65 | 649.33 | S   | 434.24  | 217.62 | 417.21  | 209.11 | 416.23  | 208.62 | 4     |
| 14 | 1386.7  | 693.85 | 1369.67 | 685.34 | 1368.69 | 684.85 | A   | 347.2   | 174.11 | 330.18  | 165.59 | 329.19  | 165.1  | 3     |
| 15 | 1487.75 | 744.38 | 1470.72 | 735.86 | 1469.74 | 735.37 | T   | 276.17  | 138.59 | 259.14  | 130.07 | 258.16  | 129.58 | 2     |
| 16 |         |        |         |        |         |        | R   | 175.12  | 88.06  | 158.09  | 79.55  |         |        | 1     |

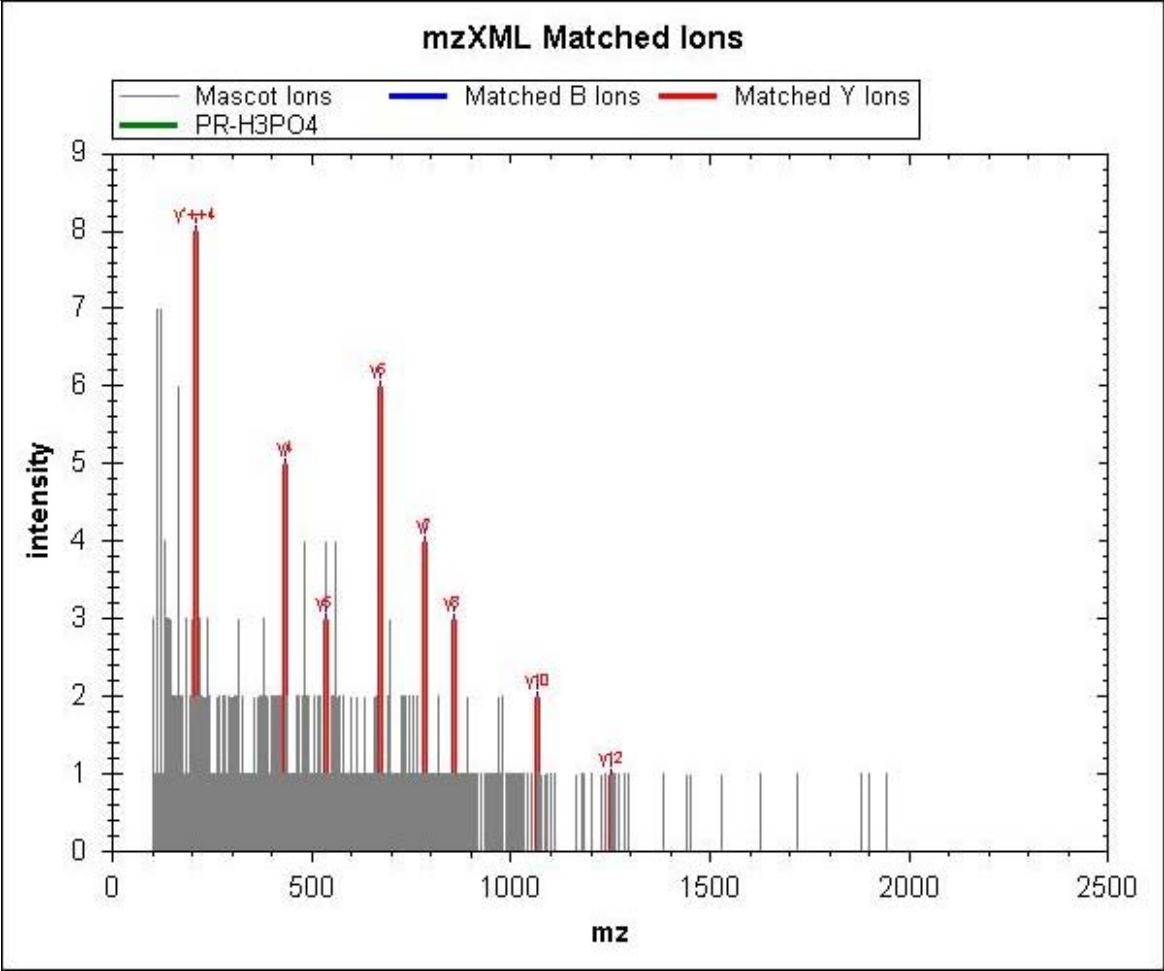

Protein index=294, ACC No:IPI00019899

Peptide index=2116 MS/MS spectrum

Sequence: IFGTDSQYNAYNEK, m/z:825.3758, charge:+ 2, Modification: , Mod Position:

Score: 75.95, Raw data:WET\_B1\_090616\_03.mzxml, MS/MS Elution time: 40.98733, Scan number:2160, Mass delta:0.0004, Rank:1

| No | b       | b++    | b*      | b*++   | b0      | b0++   | Seq | y       | y++    | y*      | y*++   | y0      | y0++   | RevNo |
|----|---------|--------|---------|--------|---------|--------|-----|---------|--------|---------|--------|---------|--------|-------|
| 1  | 114.09  | 57.55  |         |        |         |        | I   |         |        |         |        |         |        | 14    |
| 2  | 261.16  | 131.08 |         |        |         |        | F   | 1536.66 | 768.83 | 1519.63 | 760.32 | 1518.65 | 759.83 | 13    |
| 3  | 318.18  | 159.59 |         |        |         |        | G   | 1389.59 | 695.3  | 1372.57 | 686.79 | 1371.58 | 686.29 | 12    |
| 4  | 419.23  | 210.12 |         |        | 401.22  | 201.11 | T   | 1332.57 | 666.79 | 1315.54 | 658.28 | 1314.56 | 657.78 | 11    |
| 5  | 534.26  | 267.63 |         |        | 516.25  | 258.63 | D   | 1231.52 | 616.26 | 1214.5  | 607.75 | 1213.51 | 607.26 | 10    |
| 6  | 621.29  | 311.15 |         |        | 603.28  | 302.14 | S   | 1116.5  | 558.75 | 1099.47 | 550.24 | 1098.48 | 549.75 | 9     |
| 7  | 749.35  | 375.18 | 732.32  | 366.66 | 731.34  | 366.17 | Q   | 1029.46 | 515.24 | 1012.44 | 506.72 | 1011.45 | 506.23 | 8     |
| 8  | 912.41  | 456.71 | 895.38  | 448.2  | 894.4   | 447.7  | Y   | 901.4   | 451.21 | 884.38  | 442.69 | 883.39  | 442.2  | 7     |
| 9  | 1026.45 | 513.73 | 1009.43 | 505.22 | 1008.44 | 504.72 | N   | 738.34  | 369.67 | 721.32  | 361.16 | 720.33  | 360.67 | 6     |
| 10 | 1097.49 | 549.25 | 1080.46 | 540.74 | 1079.48 | 540.24 | A   | 624.3   | 312.65 | 607.27  | 304.14 | 606.29  | 303.65 | 5     |
| 11 | 1260.55 | 630.78 | 1243.53 | 622.27 | 1242.54 | 621.77 | Y   | 553.26  | 277.13 | 536.24  | 268.62 | 535.25  | 268.13 | 4     |
| 12 | 1374.6  | 687.8  | 1357.57 | 679.29 | 1356.59 | 678.8  | N   | 390.2   | 195.6  | 373.17  | 187.09 | 372.19  | 186.6  | 3     |
| 13 | 1503.64 | 752.32 | 1486.61 | 743.81 | 1485.63 | 743.32 | E   | 276.16  | 138.58 | 259.13  | 130.07 | 258.14  | 129.58 | 2     |
| 14 |         |        |         |        |         |        | K   | 147.11  | 74.06  | 130.09  | 65.55  |         |        | 1     |

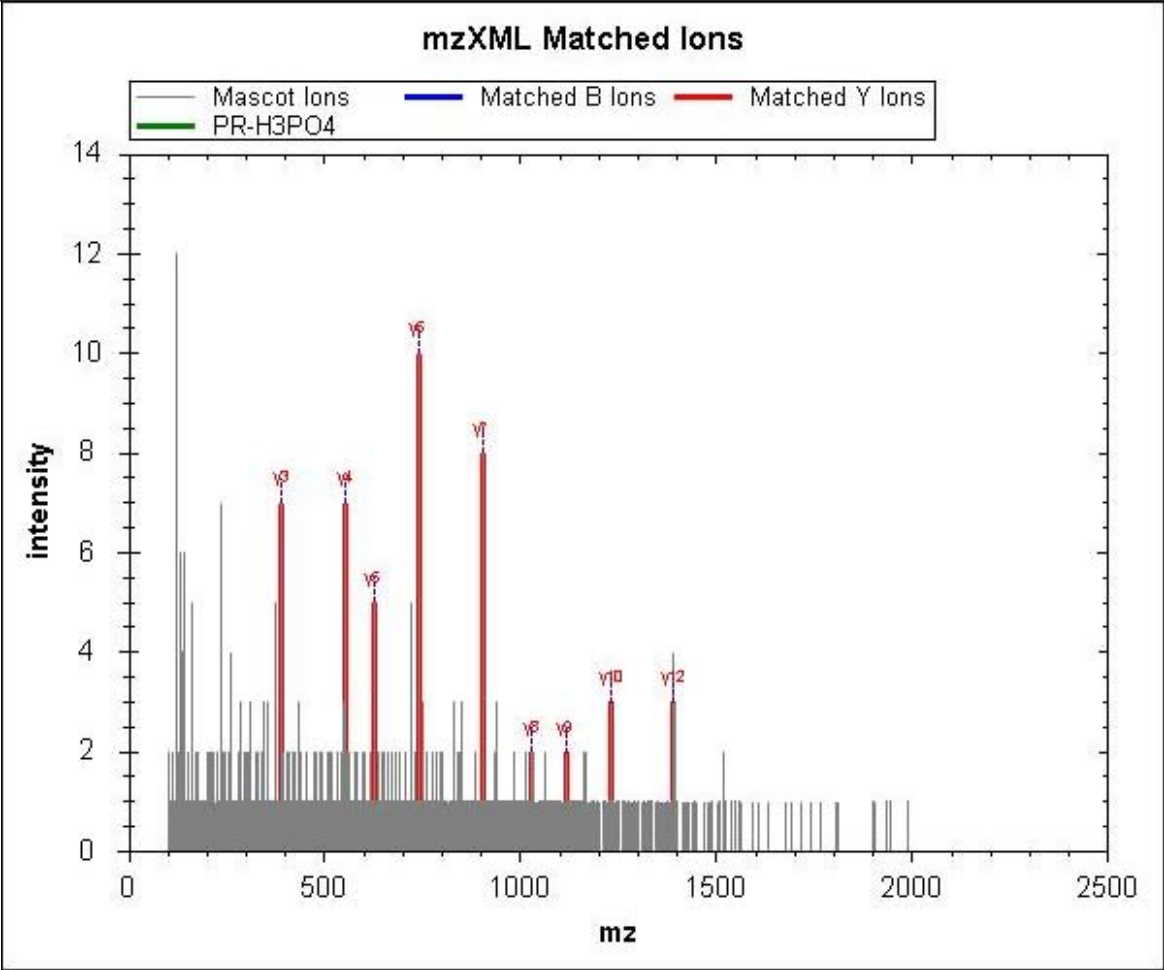

Protein index=296, ACC No:IPI00028946

Peptide index=1659 MS/MS spectrum

Sequence: TQIDHYVGIAR, m/z:636.8373, charge:+ 2, Modification: , Mod Position:

Score: 58.8, Raw data:WET\_B1\_090616\_02.mzxml, MS/MS Elution time: 36.09816, Scan number:1873, Mass delta:-0.006, Rank:1

| No | b       | b++    | b*      | b*++   | b0      | b0++   | Seq | y       | y++    | y*      | y*++   | y0      | y0++   | RevNo |
|----|---------|--------|---------|--------|---------|--------|-----|---------|--------|---------|--------|---------|--------|-------|
| 1  | 102.05  | 51.53  |         |        | 84.04   | 42.53  | T   |         |        |         |        |         |        | 11    |
| 2  | 230.11  | 115.56 | 213.09  | 107.05 | 212.1   | 106.56 | Q   | 1171.62 | 586.31 | 1154.6  | 577.8  | 1153.61 | 577.31 | 10    |
| 3  | 343.2   | 172.1  | 326.17  | 163.59 | 325.19  | 163.1  | I   | 1043.56 | 522.29 | 1026.54 | 513.77 | 1025.55 | 513.28 | 9     |
| 4  | 458.22  | 229.62 | 441.2   | 221.1  | 440.21  | 220.61 | D   | 930.48  | 465.74 | 913.45  | 457.23 | 912.47  | 456.74 | 8     |
| 5  | 595.28  | 298.15 | 578.26  | 289.63 | 577.27  | 289.14 | H   | 815.45  | 408.23 | 798.43  | 399.72 |         |        | 7     |
| 6  | 758.35  | 379.68 | 741.32  | 371.16 | 740.34  | 370.67 | Y   | 678.39  | 339.7  | 661.37  | 331.19 |         |        | 6     |
| 7  | 857.42  | 429.21 | 840.39  | 420.7  | 839.4   | 420.21 | V   | 515.33  | 258.17 | 498.3   | 249.66 |         |        | 5     |
| 8  | 914.44  | 457.72 | 897.41  | 449.21 | 896.43  | 448.72 | G   | 416.26  | 208.63 | 399.24  | 200.12 |         |        | 4     |
| 9  | 1027.52 | 514.26 | 1010.49 | 505.75 | 1009.51 | 505.26 | I   | 359.24  | 180.12 | 342.21  | 171.61 |         |        | 3     |
| 10 | 1098.56 | 549.78 | 1081.53 | 541.27 | 1080.55 | 540.78 | A   | 246.16  | 123.58 | 229.13  | 115.07 |         |        | 2     |
| 11 |         |        |         |        |         |        | R   | 175.12  | 88.06  | 158.09  | 79.55  |         |        | 1     |

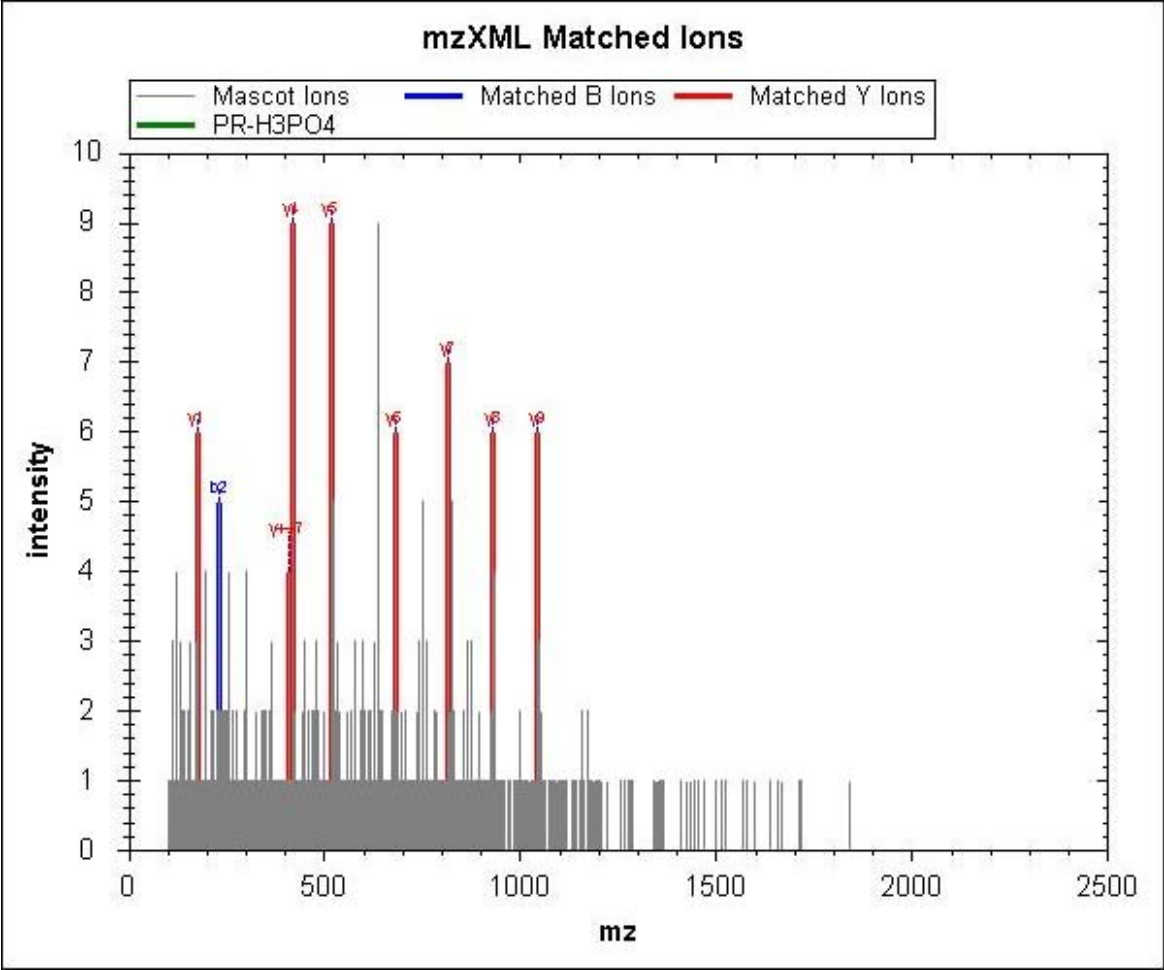

Protein index=299, ACC No:IPI00008338

Peptide index=5794 MS/MS spectrum

Sequence: AVYSNADIYLFDDPLSAVDAHVGK, m/z:860.7613, charge:+ 3, Modification: , Mod Position:

Score: 37.68, Raw data:WET\_A1\_090616\_02.mzxml, MS/MS Elution time: 78.2355, Scan number:4346, Mass delta:0.0077, Rank:1

| No | b       | b++     | b*      | b*++    | b0      | b0++    | Seq | y       | y++     | y*      | y*++    | y0      | y0++    | RevNo |
|----|---------|---------|---------|---------|---------|---------|-----|---------|---------|---------|---------|---------|---------|-------|
| 1  | 72.04   | 36.53   |         |         |         |         | A   |         |         |         |         |         |         | 24    |
| 2  | 171.11  | 86.06   |         |         |         |         | V   | 2509.22 | 1255.12 | 2492.2  | 1246.6  | 2491.21 | 1246.11 | 23    |
| 3  | 334.18  | 167.59  |         |         |         |         | Y   | 2410.16 | 1205.58 | 2393.13 | 1197.07 | 2392.15 | 1196.58 | 22    |
| 4  | 421.21  | 211.11  |         |         | 403.2   | 202.1   | S   | 2247.09 | 1124.05 | 2230.07 | 1115.54 | 2229.08 | 1115.04 | 21    |
| 5  | 535.25  | 268.13  | 518.22  | 259.62  | 517.24  | 259.12  | N   | 2160.06 | 1080.53 | 2143.03 | 1072.02 | 2142.05 | 1071.53 | 20    |
| 6  | 606.29  | 303.65  | 589.26  | 295.13  | 588.28  | 294.64  | A   | 2046.02 | 1023.51 | 2028.99 | 1015    | 2028.01 | 1014.51 | 19    |
| 7  | 721.32  | 361.16  | 704.29  | 352.65  | 703.3   | 352.16  | D   | 1974.98 | 987.99  | 1957.95 | 979.48  | 1956.97 | 978.99  | 18    |
| 8  | 834.4   | 417.7   | 817.37  | 409.19  | 816.39  | 408.7   | I   | 1859.95 | 930.48  | 1842.93 | 921.97  | 1841.94 | 921.48  | 17    |
| 9  | 997.46  | 499.23  | 980.44  | 490.72  | 979.45  | 490.23  | Y   | 1746.87 | 873.94  | 1729.84 | 865.43  | 1728.86 | 864.93  | 16    |
| 10 | 1110.55 | 555.78  | 1093.52 | 547.26  | 1092.54 | 546.77  | L   | 1583.81 | 792.41  | 1566.78 | 783.89  | 1565.8  | 783.4   | 15    |
| 11 | 1257.61 | 629.31  | 1240.59 | 620.8   | 1239.6  | 620.31  | F   | 1470.72 | 735.86  | 1453.7  | 727.35  | 1452.71 | 726.86  | 14    |
| 12 | 1372.64 | 686.82  | 1355.62 | 678.31  | 1354.63 | 677.82  | D   | 1323.65 | 662.33  | 1306.63 | 653.82  | 1305.64 | 653.33  | 13    |
| 13 | 1487.67 | 744.34  | 1470.64 | 735.82  | 1469.66 | 735.33  | D   | 1208.63 | 604.82  | 1191.6  | 596.3   | 1190.62 | 595.81  | 12    |
| 14 | 1584.72 | 792.86  | 1567.7  | 784.35  | 1566.71 | 783.86  | P   | 1093.6  | 547.3   | 1076.57 | 538.79  | 1075.59 | 538.3   | 11    |
| 15 | 1697.81 | 849.41  | 1680.78 | 840.89  | 1679.8  | 840.4   | L   | 996.55  | 498.78  | 979.52  | 490.26  | 978.54  | 489.77  | 10    |
| 16 | 1784.84 | 892.92  | 1767.81 | 884.41  | 1766.83 | 883.92  | S   | 883.46  | 442.24  | 866.44  | 433.72  | 865.45  | 433.23  | 9     |
| 17 | 1855.87 | 928.44  | 1838.85 | 919.93  | 1837.86 | 919.44  | A   | 796.43  | 398.72  | 779.4   | 390.21  | 778.42  | 389.71  | 8     |
| 18 | 1954.94 | 977.98  | 1937.92 | 969.46  | 1936.93 | 968.97  | V   | 725.39  | 363.2   | 708.37  | 354.69  | 707.38  | 354.2   | 7     |
| 19 | 2069.97 | 1035.49 | 2052.94 | 1026.98 | 2051.96 | 1026.48 | D   | 626.33  | 313.67  | 609.3   | 305.15  | 608.32  | 304.66  | 6     |
| 20 | 2141.01 | 1071.01 | 2123.98 | 1062.49 | 2123    | 1062    | A   | 511.3   | 256.15  | 494.27  | 247.64  |         |         | 5     |
| 21 | 2278.07 | 1139.54 | 2261.04 | 1131.02 | 2260.06 | 1130.53 | H   | 440.26  | 220.63  | 423.24  | 212.12  |         |         | 4     |
| 22 | 2377.13 | 1189.07 | 2360.11 | 1180.56 | 2359.12 | 1180.07 | V   | 303.2   | 152.1   | 286.18  | 143.59  |         |         | 3     |
| 23 | 2434.16 | 1217.58 | 2417.13 | 1209.07 | 2416.15 | 1208.58 | G   | 204.13  | 102.57  | 187.11  | 94.06   |         |         | 2     |
| 24 |         |         |         |         |         |         | K   | 147.11  | 74.06   | 130.09  | 65.55   |         |         | 1     |

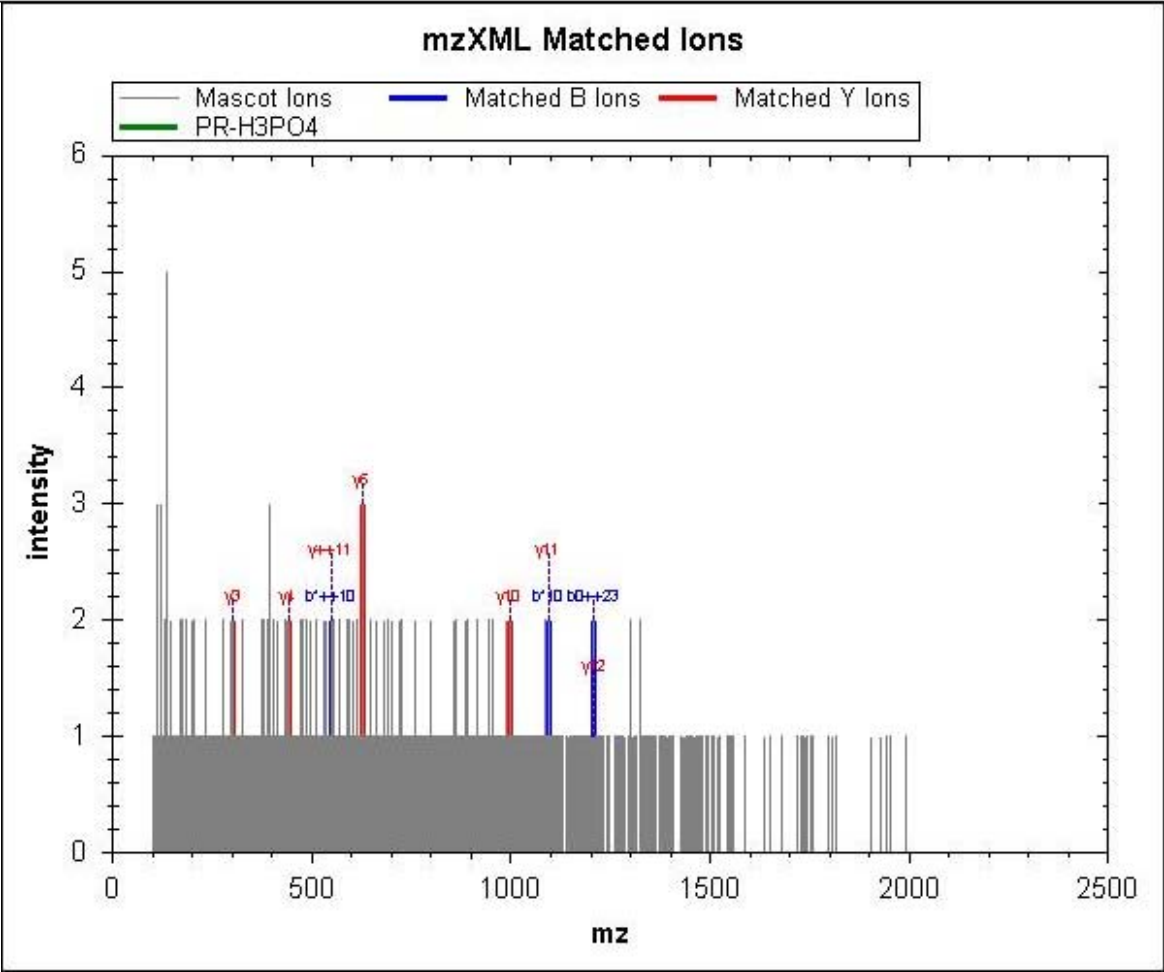

Protein index=300, ACC No:IPI00385001

Peptide index=6078 MS/MS spectrum

Sequence: ELWTILLGR, m/z:550.8297, charge:+ 2, Modification: , Mod Position:

Score: 53.44, Raw data:WET\_A1\_090616\_02.mzxml, MS/MS Elution time: 82.23534, Scan number:4580, Mass delta:0.0059, Rank:1

| No | b      | b++    | b0     | b0++   | Seq | y      | y++    | y*     | y*++   | y0     | y0++   | RevNo |
|----|--------|--------|--------|--------|-----|--------|--------|--------|--------|--------|--------|-------|
| 1  | 130.05 | 65.53  | 112.04 | 56.52  | E   |        |        |        |        |        |        | 9     |
| 2  | 243.13 | 122.07 | 225.12 | 113.07 | L   | 971.6  | 486.31 | 954.58 | 477.79 | 953.59 | 477.3  | 8     |
| 3  | 429.21 | 215.11 | 411.2  | 206.1  | W   | 858.52 | 429.76 | 841.49 | 421.25 | 840.51 | 420.76 | 7     |
| 4  | 530.26 | 265.63 | 512.25 | 256.63 | T   | 672.44 | 336.72 | 655.41 | 328.21 | 654.43 | 327.72 | 6     |
| 5  | 643.34 | 322.18 | 625.33 | 313.17 | I   | 571.39 | 286.2  | 554.37 | 277.69 |        |        | 5     |
| 6  | 756.43 | 378.72 | 738.42 | 369.71 | L   | 458.31 | 229.66 | 441.28 | 221.14 |        |        | 4     |
| 7  | 869.51 | 435.26 | 851.5  | 426.25 | L   | 345.22 | 173.12 | 328.2  | 164.6  |        |        | 3     |
| 8  | 926.53 | 463.77 | 908.52 | 454.77 | G   | 232.14 | 116.57 | 215.11 | 108.06 |        |        | 2     |
| 9  |        |        |        |        | R   | 175.12 | 88.06  | 158.09 | 79.55  |        |        | 1     |

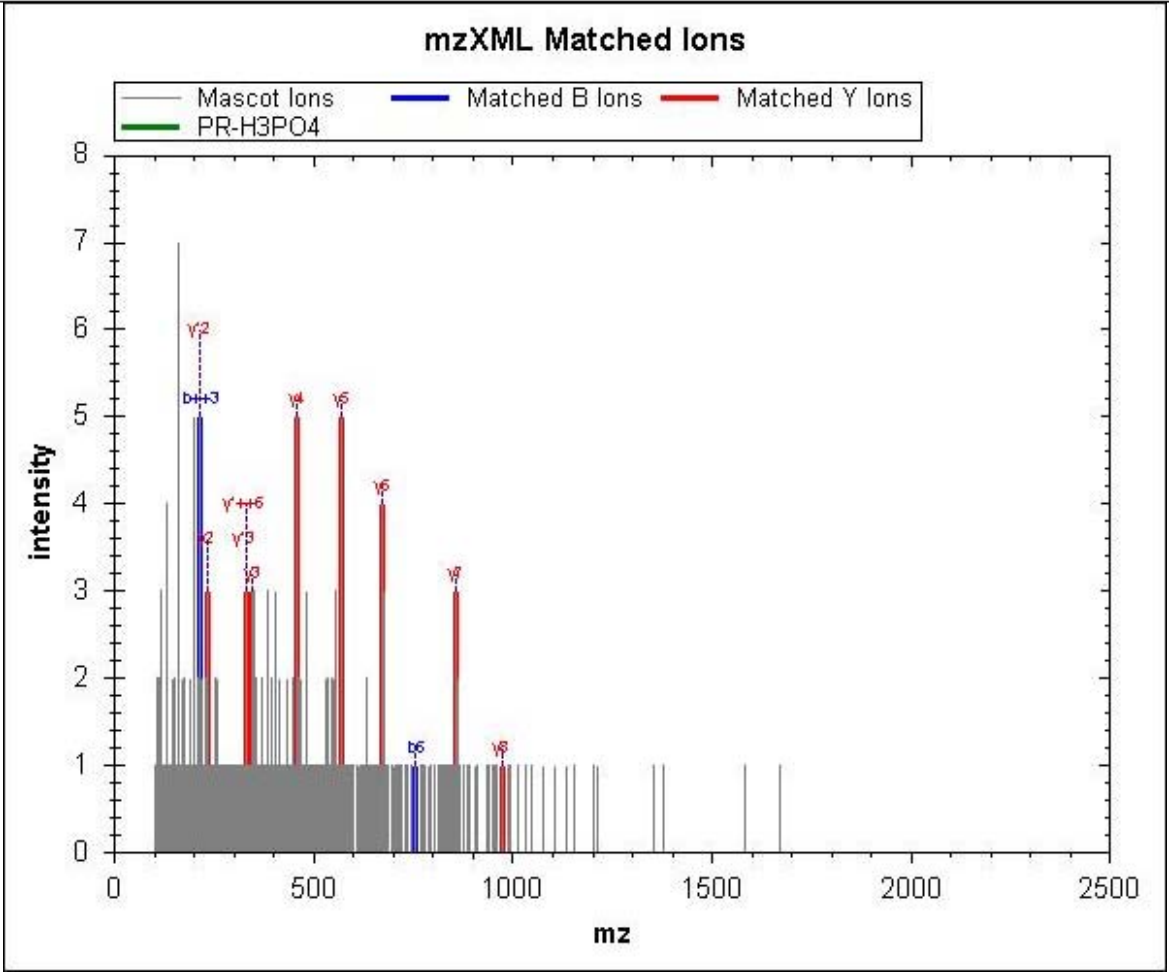

Protein index=302, ACC No:IPI00032825

Peptide index=1967 MS/MS spectrum

Sequence: SVIDYQTHFR, m/z:633.3154, charge:+ 2, Modification: , Mod Position:

Score: 59.51, Raw data:WET\_B1\_090616\_02.mzxml, MS/MS Elution time: 39.44533, Scan number:2069, Mass delta:0.0001, Rank:1

| No | b       | b++    | b*      | b*++   | b0      | b0++   | Seq | y       | y++    | y*      | y*++   | y0      | y0++   | RevNo |
|----|---------|--------|---------|--------|---------|--------|-----|---------|--------|---------|--------|---------|--------|-------|
| 1  | 88.04   | 44.52  |         |        | 70.03   | 35.52  | S   |         |        |         |        |         |        | 10    |
| 2  | 187.11  | 94.06  |         |        | 169.1   | 85.05  | V   | 1178.6  | 589.8  | 1161.57 | 581.29 | 1160.58 | 580.8  | 9     |
| 3  | 300.19  | 150.6  |         |        | 282.18  | 141.59 | I   | 1079.53 | 540.27 | 1062.5  | 531.75 | 1061.52 | 531.26 | 8     |
| 4  | 415.22  | 208.11 |         |        | 397.21  | 199.11 | D   | 966.44  | 483.73 | 949.42  | 475.21 | 948.43  | 474.72 | 7     |
| 5  | 578.28  | 289.64 |         |        | 560.27  | 280.64 | Y   | 851.42  | 426.21 | 834.39  | 417.7  | 833.41  | 417.21 | 6     |
| 6  | 706.34  | 353.67 | 689.31  | 345.16 | 688.33  | 344.67 | Q   | 688.35  | 344.68 | 671.33  | 336.17 | 670.34  | 335.67 | 5     |
| 7  | 807.39  | 404.2  | 790.36  | 395.68 | 789.38  | 395.19 | T   | 560.29  | 280.65 | 543.27  | 272.14 | 542.28  | 271.65 | 4     |
| 8  | 944.45  | 472.73 | 927.42  | 464.21 | 926.44  | 463.72 | H   | 459.25  | 230.13 | 442.22  | 221.61 |         |        | 3     |
| 9  | 1091.52 | 546.26 | 1074.49 | 537.75 | 1073.51 | 537.26 | F   | 322.19  | 161.6  | 305.16  | 153.08 |         |        | 2     |
| 10 |         |        |         |        |         |        | R   | 175.12  | 88.06  | 158.09  | 79.55  |         |        | 1     |

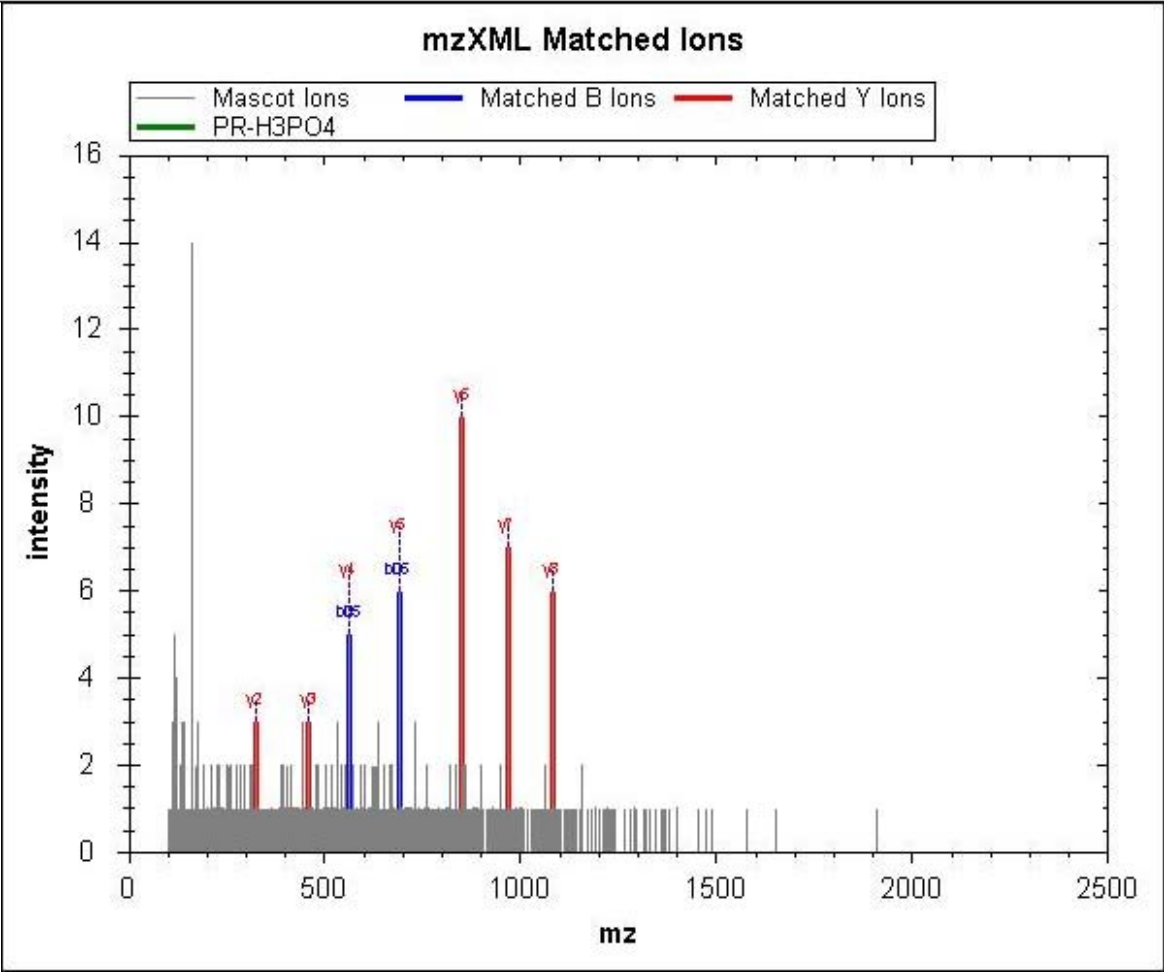

Protein index=303, ACC No:IPI00023185

Peptide index=3853 MS/MS spectrum

Sequence: TFLQDLAR, m/z:482.2671, charge:+ 2, Modification: , Mod Position:

Score: 59.53, Raw data:WET\_B1\_090616\_03.mzxml, MS/MS Elution time: 56.43666, Scan number:3065, Mass delta:-0.0018, Rank:1

| No | b      | b++    | b*     | b*++   | b0     | b0++   | Seq | y      | y++    | y*     | y*++   | y0     | y0++   | RevNo |
|----|--------|--------|--------|--------|--------|--------|-----|--------|--------|--------|--------|--------|--------|-------|
| 1  | 102.05 | 51.53  |        |        | 84.04  | 42.53  | T   |        |        |        |        |        |        | 8     |
| 2  | 249.12 | 125.07 |        |        | 231.11 | 116.06 | F   | 862.48 | 431.74 | 845.45 | 423.23 | 844.47 | 422.74 | 7     |
| 3  | 362.21 | 181.61 |        |        | 344.2  | 172.6  | L   | 715.41 | 358.21 | 698.38 | 349.7  | 697.4  | 349.2  | 6     |
| 4  | 490.27 | 245.64 | 473.24 | 237.12 | 472.26 | 236.63 | Q   | 602.33 | 301.67 | 585.3  | 293.15 | 584.32 | 292.66 | 5     |
| 5  | 605.29 | 303.15 | 588.27 | 294.64 | 587.28 | 294.14 | D   | 474.27 | 237.64 | 457.24 | 229.12 | 456.26 | 228.63 | 4     |
| 6  | 718.38 | 359.69 | 701.35 | 351.18 | 700.37 | 350.69 | L   | 359.24 | 180.12 | 342.21 | 171.61 |        |        | 3     |
| 7  | 789.41 | 395.21 | 772.39 | 386.7  | 771.4  | 386.21 | A   | 246.16 | 123.58 | 229.13 | 115.07 |        |        | 2     |
| 8  |        |        |        |        |        |        | R   | 175.12 | 88.06  | 158.09 | 79.55  |        |        | 1     |

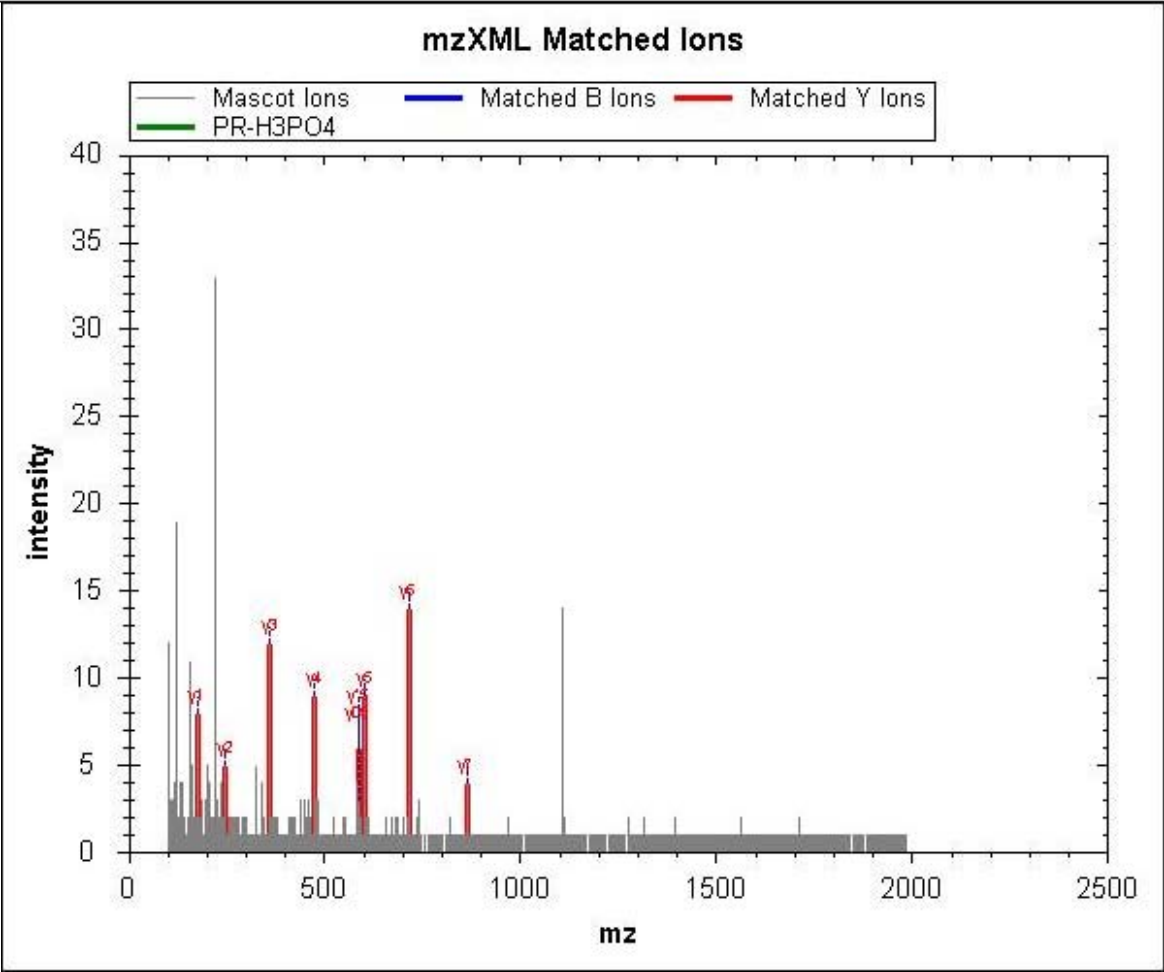

Protein index=304, ACC No:IPI00024167

Peptide index=6492 MS/MS spectrum

Sequence: DLLALFNSFKPK, m/z:696.8962, charge:+ 2, Modification: , Mod Position:

Score: 54.34, Raw data:WET\_B1\_090616\_03.mzxml, MS/MS Elution time: 89.00967, Scan number:4972, Mass delta:0.001, Rank:1

| No | b       | b++    | b*      | b*++   | b0      | b0++   | Seq | y       | y++    | y*      | y*++   | y0      | y0++   | RevNo |
|----|---------|--------|---------|--------|---------|--------|-----|---------|--------|---------|--------|---------|--------|-------|
| 1  | 116.03  | 58.52  |         |        | 98.02   | 49.52  | D   |         |        |         |        |         |        | 12    |
| 2  | 229.12  | 115.06 |         |        | 211.11  | 106.06 | L   | 1277.76 | 639.38 | 1260.74 | 630.87 | 1259.75 | 630.38 | 11    |
| 3  | 342.2   | 171.6  |         |        | 324.19  | 162.6  | L   | 1164.68 | 582.84 | 1147.65 | 574.33 | 1146.67 | 573.84 | 10    |
| 4  | 413.24  | 207.12 |         |        | 395.23  | 198.12 | A   | 1051.59 | 526.3  | 1034.57 | 517.79 | 1033.58 | 517.3  | 9     |
| 5  | 526.32  | 263.67 |         |        | 508.31  | 254.66 | L   | 980.56  | 490.78 | 963.53  | 482.27 | 962.55  | 481.78 | 8     |
| 6  | 673.39  | 337.2  |         |        | 655.38  | 328.19 | F   | 867.47  | 434.24 | 850.45  | 425.73 | 849.46  | 425.23 | 7     |
| 7  | 787.43  | 394.22 | 770.41  | 385.71 | 769.42  | 385.22 | N   | 720.4   | 360.71 | 703.38  | 352.19 | 702.39  | 351.7  | 6     |
| 8  | 874.47  | 437.74 | 857.44  | 429.22 | 856.46  | 428.73 | S   | 606.36  | 303.68 | 589.33  | 295.17 | 588.35  | 294.68 | 5     |
| 9  | 1021.54 | 511.27 | 1004.51 | 502.76 | 1003.52 | 502.27 | F   | 519.33  | 260.17 | 502.3   | 251.65 |         |        | 4     |
| 10 | 1149.63 | 575.32 | 1132.6  | 566.81 | 1131.62 | 566.31 | K   | 372.26  | 186.63 | 355.23  | 178.12 |         |        | 3     |
| 11 | 1246.68 | 623.85 | 1229.66 | 615.33 | 1228.67 | 614.84 | P   | 244.17  | 122.59 | 227.14  | 114.07 |         |        | 2     |
| 12 |         |        |         |        |         |        | K   | 147.11  | 74.06  | 130.09  | 65.55  |         |        | 1     |

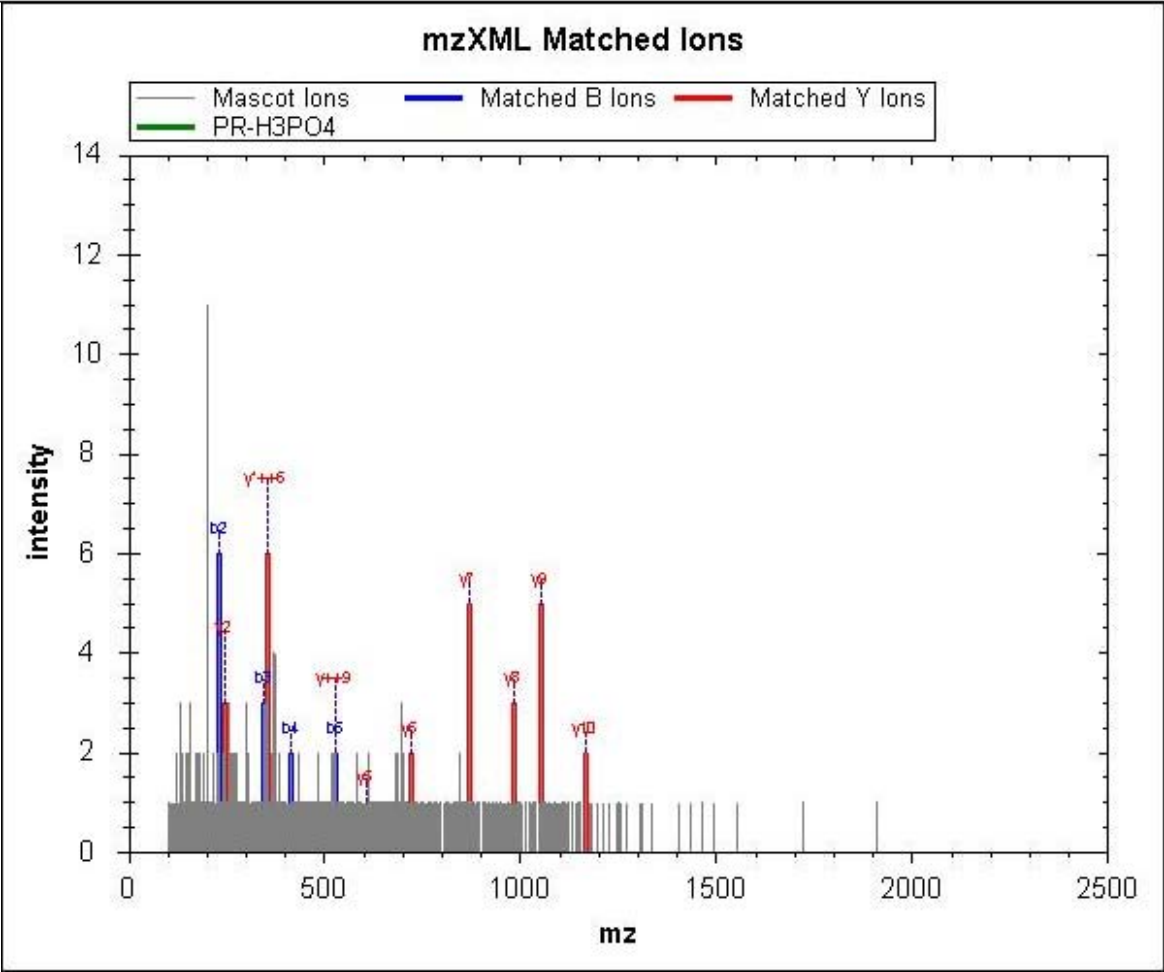

Protein index=309, ACC No:IPI00166079

Peptide index=6327 MS/MS spectrum

Sequence: GFGLLSIFGK, m/z:548.3143, charge:+ 2, Modification: , Mod Position:

Score: 46.56, Raw data:WET\_A1\_090616\_03.mzxml, MS/MS Elution time: 86.77634, Scan number:4819, Mass delta:0.0017, Rank:1

| No | b      | b++    | b0     | b0++   | Seq | y      | y++    | y*      | y*++   | y0      | y0++   | RevNo |
|----|--------|--------|--------|--------|-----|--------|--------|---------|--------|---------|--------|-------|
| 1  | 58.03  | 29.52  |        |        | G   |        |        |         |        |         |        | 11    |
| 2  | 205.1  | 103.05 |        |        | F   | 1038.6 | 519.8  | 1021.57 | 511.29 | 1020.59 | 510.8  | 10    |
| 3  | 262.12 | 131.56 |        |        | G   | 891.53 | 446.27 | 874.5   | 437.76 | 873.52  | 437.26 | 9     |
| 4  | 375.2  | 188.1  |        |        | L   | 834.51 | 417.76 | 817.48  | 409.24 | 816.5   | 408.75 | 8     |
| 5  | 488.29 | 244.65 |        |        | L   | 721.42 | 361.22 | 704.4   | 352.7  | 703.41  | 352.21 | 7     |
| 6  | 545.31 | 273.16 |        |        | G   | 608.34 | 304.67 | 591.31  | 296.16 | 590.33  | 295.67 | 6     |
| 7  | 632.34 | 316.67 | 614.33 | 307.67 | S   | 551.32 | 276.16 | 534.29  | 267.65 | 533.31  | 267.16 | 5     |
| 8  | 745.42 | 373.22 | 727.41 | 364.21 | I   | 464.29 | 232.65 | 447.26  | 224.13 |         |        | 4     |
| 9  | 892.49 | 446.75 | 874.48 | 437.74 | F   | 351.2  | 176.1  | 334.18  | 167.59 |         |        | 3     |
| 10 | 949.51 | 475.26 | 931.5  | 466.26 | G   | 204.13 | 102.57 | 187.11  | 94.06  |         |        | 2     |
| 11 |        |        |        |        | K   | 147.11 | 74.06  | 130.09  | 65.55  |         |        | 1     |

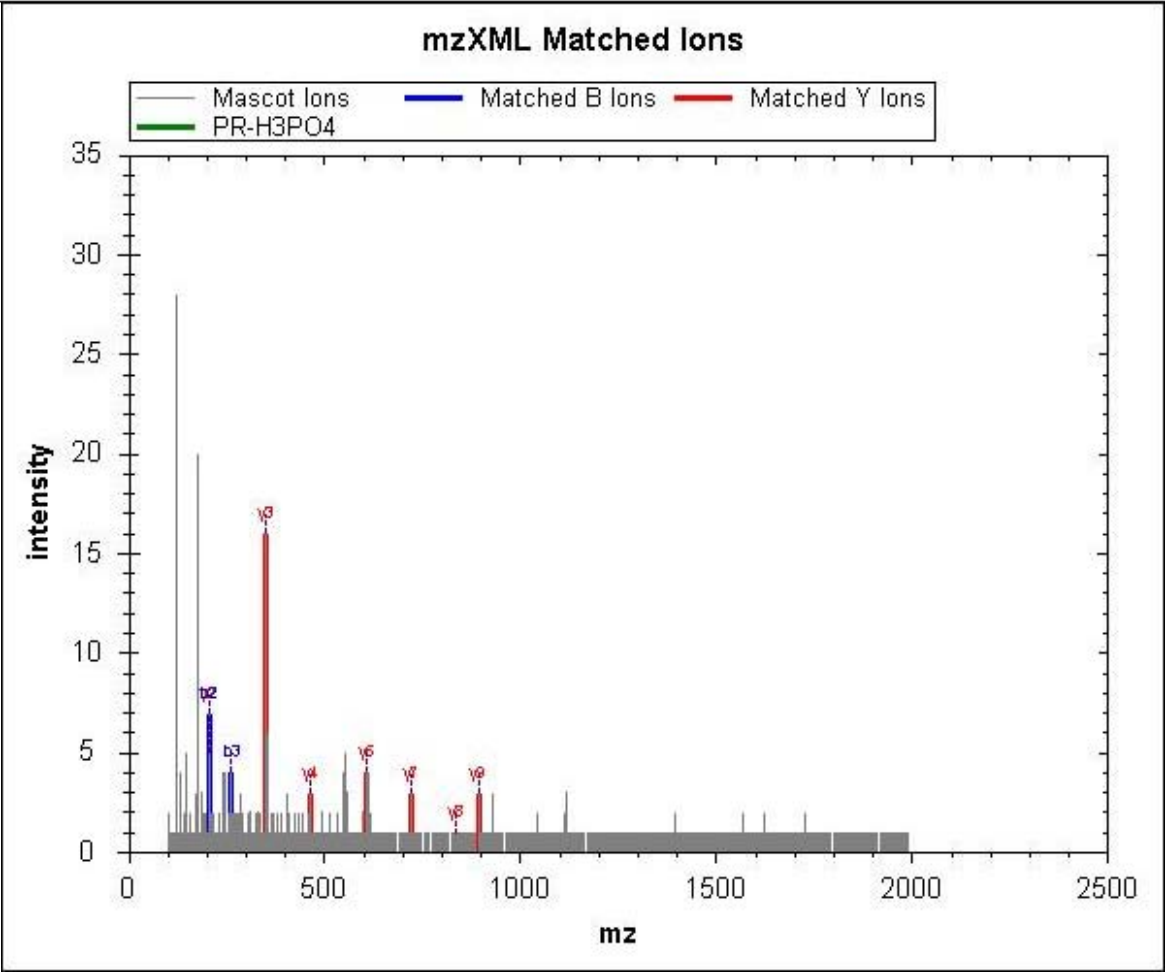

Protein index=310, ACC No:IPI00291544

Peptide index=5178 MS/MS spectrum

Sequence: ELHAPLTVVADGLFSK, m/z:566.3126, charge:+ 3, Modification: , Mod Position:

Score: 52.88, Raw data:WET\_A1\_090616\_03.mzxml, MS/MS Elution time: 70.25533, Scan number:3853, Mass delta:-0.0035, Rank:1

| No | b       | b++    | b0      | b0++   | Seq | y       | y++    | y*      | y*++   | y0      | y0++   | RevNo |
|----|---------|--------|---------|--------|-----|---------|--------|---------|--------|---------|--------|-------|
| 1  | 130.05  | 65.53  | 112.04  | 56.52  | E   |         |        |         |        |         |        | 16    |
| 2  | 243.13  | 122.07 | 225.12  | 113.07 | L   | 1567.88 | 784.45 | 1550.86 | 775.93 | 1549.87 | 775.44 | 15    |
| 3  | 380.19  | 190.6  | 362.18  | 181.59 | H   | 1454.8  | 727.9  | 1437.77 | 719.39 | 1436.79 | 718.9  | 14    |
| 4  | 451.23  | 226.12 | 433.22  | 217.11 | A   | 1317.74 | 659.37 | 1300.71 | 650.86 | 1299.73 | 650.37 | 13    |
| 5  | 548.28  | 274.64 | 530.27  | 265.64 | P   | 1246.7  | 623.86 | 1229.68 | 615.34 | 1228.69 | 614.85 | 12    |
| 6  | 661.37  | 331.19 | 643.36  | 322.18 | L   | 1149.65 | 575.33 | 1132.62 | 566.82 | 1131.64 | 566.32 | 11    |
| 7  | 762.41  | 381.71 | 744.4   | 372.71 | T   | 1036.57 | 518.79 | 1019.54 | 510.27 | 1018.56 | 509.78 | 10    |
| 8  | 861.48  | 431.25 | 843.47  | 422.24 | V   | 935.52  | 468.26 | 918.49  | 459.75 | 917.51  | 459.26 | 9     |
| 9  | 960.55  | 480.78 | 942.54  | 471.77 | V   | 836.45  | 418.73 | 819.42  | 410.22 | 818.44  | 409.72 | 8     |
| 10 | 1031.59 | 516.3  | 1013.58 | 507.29 | A   | 737.38  | 369.2  | 720.36  | 360.68 | 719.37  | 360.19 | 7     |
| 11 | 1146.62 | 573.81 | 1128.6  | 564.81 | D   | 666.35  | 333.68 | 649.32  | 325.16 | 648.34  | 324.67 | 6     |
| 12 | 1203.64 | 602.32 | 1185.63 | 593.32 | G   | 551.32  | 276.16 | 534.29  | 267.65 | 533.31  | 267.16 | 5     |

|    |         |        |         |        |   |        |        |        |        |        |        |   |
|----|---------|--------|---------|--------|---|--------|--------|--------|--------|--------|--------|---|
| 13 | 1316.72 | 658.86 | 1298.71 | 649.86 | L | 494.3  | 247.65 | 477.27 | 239.14 | 476.29 | 238.65 | 4 |
| 14 | 1463.79 | 732.4  | 1445.78 | 723.39 | F | 381.21 | 191.11 | 364.19 | 182.6  | 363.2  | 182.1  | 3 |
| 15 | 1550.82 | 775.91 | 1532.81 | 766.91 | S | 234.14 | 117.58 | 217.12 | 109.06 | 216.13 | 108.57 | 2 |
| 16 |         |        |         |        | K | 147.11 | 74.06  | 130.09 | 65.55  |        |        | 1 |

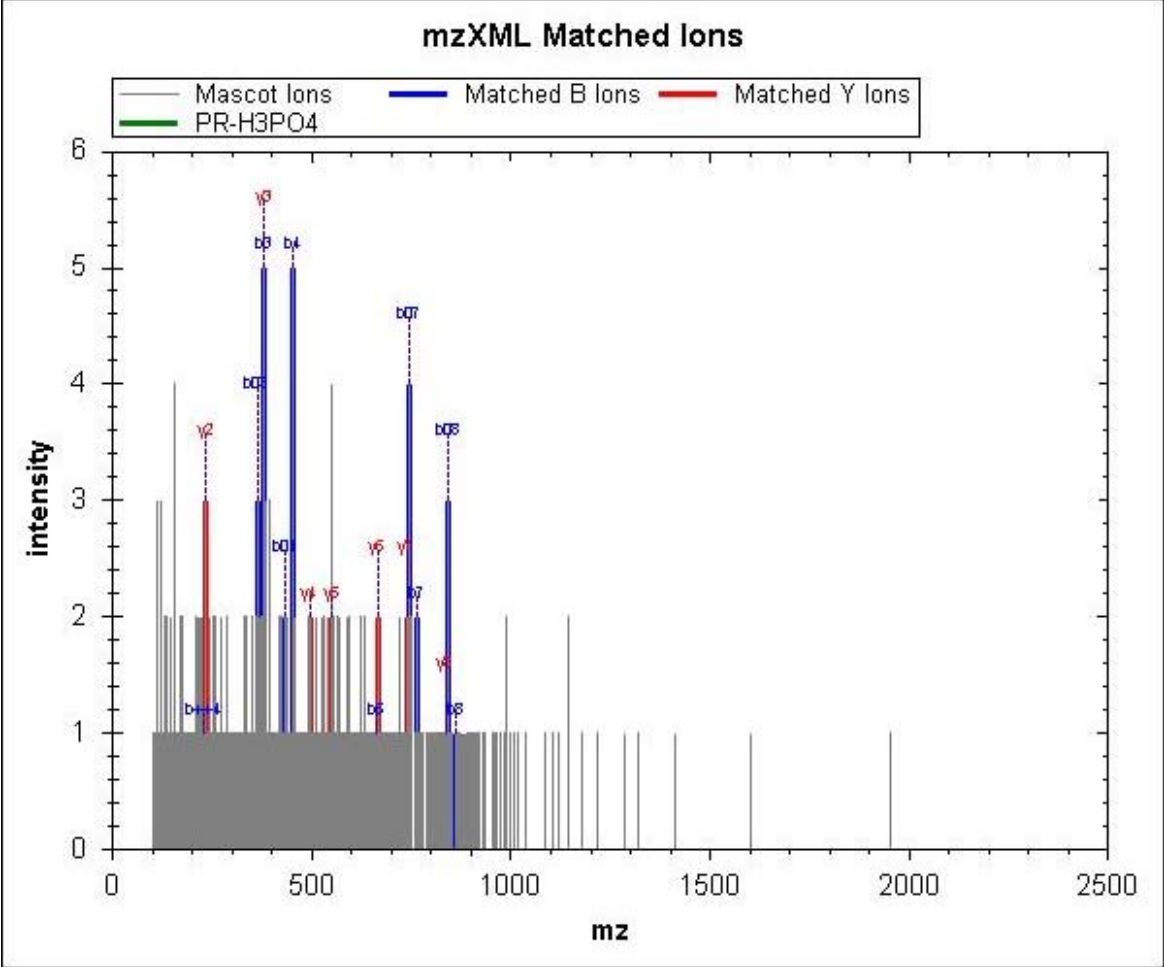

Protein index=312, ACC No:IPI00299116

Peptide index=1881 MS/MS spectrum

Sequence: LASVPGSQTVVVK, m/z:642.8785, charge:+ 2, Modification: , Mod Position:

Score: 65.6, Raw data:WET\_A1\_090616\_03.mzxml, MS/MS Elution time: 38.85083, Scan number:2029, Mass delta:-0.0025, Rank:1

| No | b      | b++    | b*     | b*++   | b0     | b0++   | Seq | y       | y++    | y*      | y*++   | y0      | y0++   | RevNo |
|----|--------|--------|--------|--------|--------|--------|-----|---------|--------|---------|--------|---------|--------|-------|
| 1  | 114.09 | 57.55  |        |        |        |        | L   |         |        |         |        |         |        | 13    |
| 2  | 185.13 | 93.07  |        |        |        |        | A   | 1171.67 | 586.34 | 1154.64 | 577.82 | 1153.66 | 577.33 | 12    |
| 3  | 272.16 | 136.58 |        |        | 254.15 | 127.58 | S   | 1100.63 | 550.82 | 1083.6  | 542.31 | 1082.62 | 541.81 | 11    |
| 4  | 371.23 | 186.12 |        |        | 353.22 | 177.11 | V   | 1013.6  | 507.3  | 996.57  | 498.79 | 995.59  | 498.3  | 10    |
| 5  | 468.28 | 234.64 |        |        | 450.27 | 225.64 | P   | 914.53  | 457.77 | 897.5   | 449.26 | 896.52  | 448.76 | 9     |
| 6  | 525.3  | 263.16 |        |        | 507.29 | 254.15 | G   | 817.48  | 409.24 | 800.45  | 400.73 | 799.47  | 400.24 | 8     |
| 7  | 612.34 | 306.67 |        |        | 594.32 | 297.67 | S   | 760.46  | 380.73 | 743.43  | 372.22 | 742.45  | 371.73 | 7     |
| 8  | 740.39 | 370.7  | 723.37 | 362.19 | 722.38 | 361.7  | Q   | 673.42  | 337.22 | 656.4   | 328.7  | 655.41  | 328.21 | 6     |

|    |         |        |         |        |         |        |   |        |        |        |        |        |        |   |
|----|---------|--------|---------|--------|---------|--------|---|--------|--------|--------|--------|--------|--------|---|
| 9  | 841.44  | 421.22 | 824.41  | 412.71 | 823.43  | 412.22 | T | 545.37 | 273.19 | 528.34 | 264.67 | 527.36 | 264.18 | 5 |
| 10 | 940.51  | 470.76 | 923.48  | 462.25 | 922.5   | 461.75 | V | 444.32 | 222.66 | 427.29 | 214.15 |        |        | 4 |
| 11 | 1039.58 | 520.29 | 1022.55 | 511.78 | 1021.57 | 511.29 | V | 345.25 | 173.13 | 328.22 | 164.62 |        |        | 3 |
| 12 | 1138.65 | 569.83 | 1121.62 | 561.31 | 1120.64 | 560.82 | V | 246.18 | 123.59 | 229.15 | 115.08 |        |        | 2 |
| 13 |         |        |         |        |         |        | K | 147.11 | 74.06  | 130.09 | 65.55  |        |        | 1 |

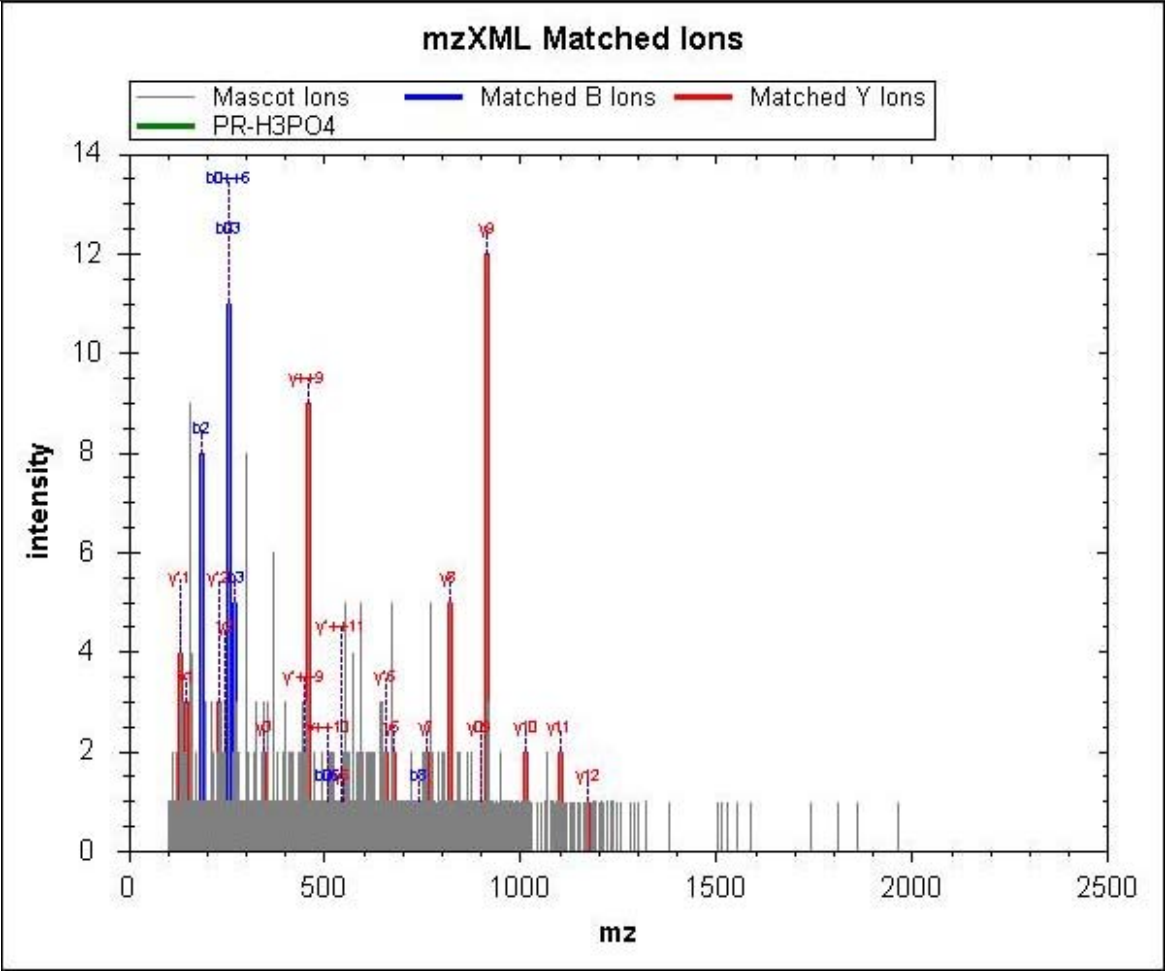

Protein index=314, ACC No:IPI00302840

Peptide index=3019 MS/MS spectrum

Sequence: IATLASGLEVGK, m/z:579.8362, charge:+ 2, Modification: , Mod Position:

Score: 59.2, Raw data:WET\_A1\_090616\_03.mzxml, MS/MS Elution time: 49.2785, Scan number:2635, Mass delta:-0.0076, Rank:1

| No | b      | b++    | b0     | b0++   | Seq | y       | y++    | y*      | y*++   | y0      | y0++   | RevNo |
|----|--------|--------|--------|--------|-----|---------|--------|---------|--------|---------|--------|-------|
| 1  | 114.09 | 57.55  |        |        | I   |         |        |         |        |         |        | 12    |
| 2  | 185.13 | 93.07  |        |        | A   | 1045.59 | 523.3  | 1028.56 | 514.78 | 1027.58 | 514.29 | 11    |
| 3  | 286.18 | 143.59 | 268.17 | 134.59 | T   | 974.55  | 487.78 | 957.53  | 479.27 | 956.54  | 478.77 | 10    |
| 4  | 399.26 | 200.13 | 381.25 | 191.13 | L   | 873.5   | 437.26 | 856.48  | 428.74 | 855.49  | 428.25 | 9     |
| 5  | 470.3  | 235.65 | 452.29 | 226.65 | A   | 760.42  | 380.71 | 743.39  | 372.2  | 742.41  | 371.71 | 8     |
| 6  | 557.33 | 279.17 | 539.32 | 270.16 | S   | 689.38  | 345.2  | 672.36  | 336.68 | 671.37  | 336.19 | 7     |
| 7  | 614.35 | 307.68 | 596.34 | 298.67 | G   | 602.35  | 301.68 | 585.32  | 293.17 | 584.34  | 292.67 | 6     |

|    |         |        |        |        |   |        |        |        |        |        |        |   |
|----|---------|--------|--------|--------|---|--------|--------|--------|--------|--------|--------|---|
| 8  | 727.43  | 364.22 | 709.42 | 355.22 | L | 545.33 | 273.17 | 528.3  | 264.65 | 527.32 | 264.16 | 5 |
| 9  | 856.48  | 428.74 | 838.47 | 419.74 | E | 432.25 | 216.63 | 415.22 | 208.11 | 414.23 | 207.62 | 4 |
| 10 | 955.55  | 478.28 | 937.54 | 469.27 | V | 303.2  | 152.1  | 286.18 | 143.59 |        |        | 3 |
| 11 | 1012.57 | 506.79 | 994.56 | 497.78 | G | 204.13 | 102.57 | 187.11 | 94.06  |        |        | 2 |
| 12 |         |        |        |        | K | 147.11 | 74.06  | 130.09 | 65.55  |        |        | 1 |

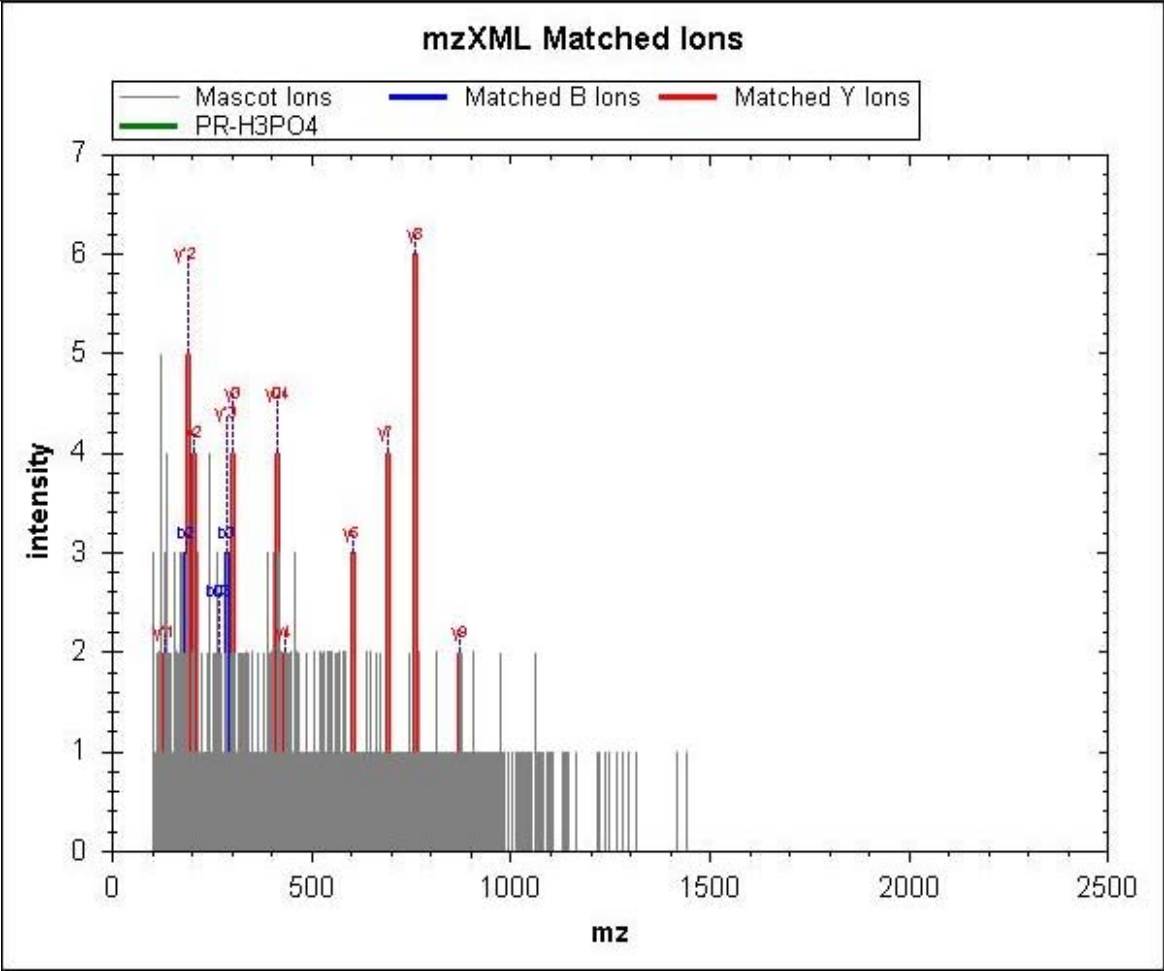

Protein index=315, ACC No:IPI00005160

Peptide index=899 MS/MS spectrum

Sequence: ASSEGGTAAGAGLDSLHK, m/z:543.5969, charge:+ 3, Modification: , Mod Position:

Score: 55.54, Raw data:WET\_A1\_090616\_03.mzxml, MS/MS Elution time: 26.86317, Scan number:1333, Mass delta:-0.0113, Rank:1

| No | b      | b++    | b0     | b0++   | Seq | y       | y++    | y*      | y*++   | y0      | y0++   | RevNo |
|----|--------|--------|--------|--------|-----|---------|--------|---------|--------|---------|--------|-------|
| 1  | 72.04  | 36.53  |        |        | A   |         |        |         |        |         |        | 18    |
| 2  | 159.08 | 80.04  | 141.07 | 71.04  | S   | 1557.75 | 779.38 | 1540.72 | 770.87 | 1539.74 | 770.37 | 17    |
| 3  | 246.11 | 123.56 | 228.1  | 114.55 | S   | 1470.72 | 735.86 | 1453.69 | 727.35 | 1452.71 | 726.86 | 16    |
| 4  | 375.15 | 188.08 | 357.14 | 179.07 | E   | 1383.69 | 692.35 | 1366.66 | 683.83 | 1365.68 | 683.34 | 15    |
| 5  | 432.17 | 216.59 | 414.16 | 207.58 | G   | 1254.64 | 627.83 | 1237.62 | 619.31 | 1236.63 | 618.82 | 14    |
| 6  | 489.19 | 245.1  | 471.18 | 236.1  | G   | 1197.62 | 599.31 | 1180.6  | 590.8  | 1179.61 | 590.31 | 13    |
| 7  | 590.24 | 295.62 | 572.23 | 286.62 | T   | 1140.6  | 570.8  | 1123.57 | 562.29 | 1122.59 | 561.8  | 12    |

|    |         |        |         |        |   |         |        |         |        |         |        |    |
|----|---------|--------|---------|--------|---|---------|--------|---------|--------|---------|--------|----|
| 8  | 661.28  | 331.14 | 643.27  | 322.14 | A | 1039.55 | 520.28 | 1022.53 | 511.77 | 1021.54 | 511.27 | 11 |
| 9  | 732.32  | 366.66 | 714.31  | 357.66 | A | 968.52  | 484.76 | 951.49  | 476.25 | 950.51  | 475.76 | 10 |
| 10 | 789.34  | 395.17 | 771.33  | 386.17 | G | 897.48  | 449.24 | 880.45  | 440.73 | 879.47  | 440.24 | 9  |
| 11 | 860.37  | 430.69 | 842.36  | 421.69 | A | 840.46  | 420.73 | 823.43  | 412.22 | 822.45  | 411.73 | 8  |
| 12 | 917.4   | 459.2  | 899.39  | 450.2  | G | 769.42  | 385.21 | 752.39  | 376.7  | 751.41  | 376.21 | 7  |
| 13 | 1030.48 | 515.74 | 1012.47 | 506.74 | L | 712.4   | 356.7  | 695.37  | 348.19 | 694.39  | 347.7  | 6  |
| 14 | 1145.51 | 573.26 | 1127.5  | 564.25 | D | 599.31  | 300.16 | 582.29  | 291.65 | 581.3   | 291.16 | 5  |
| 15 | 1232.54 | 616.77 | 1214.53 | 607.77 | S | 484.29  | 242.65 | 467.26  | 234.13 | 466.28  | 233.64 | 4  |
| 16 | 1345.62 | 673.32 | 1327.61 | 664.31 | L | 397.26  | 199.13 | 380.23  | 190.62 |         |        | 3  |
| 17 | 1482.68 | 741.84 | 1464.67 | 732.84 | H | 284.17  | 142.59 | 267.15  | 134.08 |         |        | 2  |
| 18 |         |        |         |        | K | 147.11  | 74.06  | 130.09  | 65.55  |         |        | 1  |

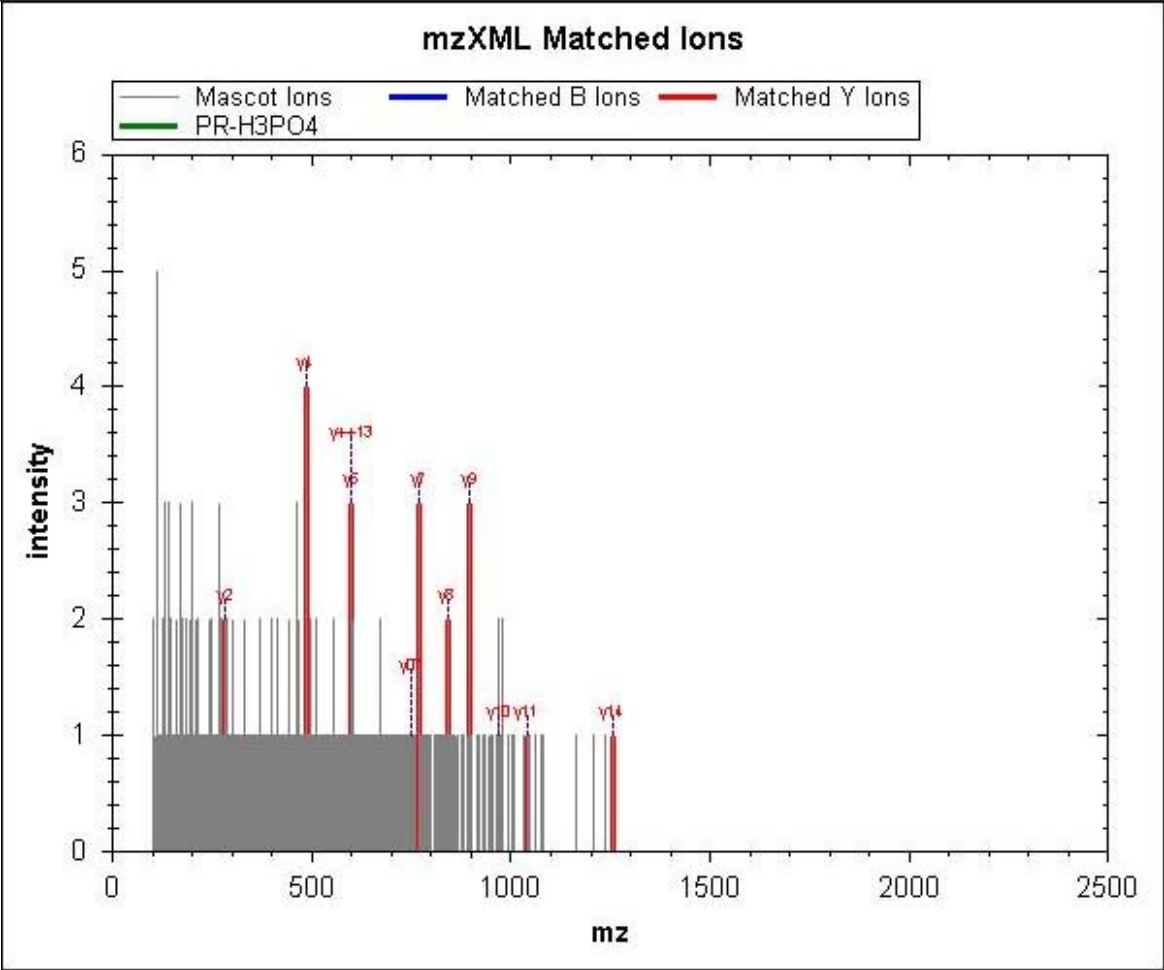

Protein index=316, ACC No:IP100414717

Peptide index=5495 MS/MS spectrum

Sequence: LLELQYFISR, m/z:641.3589, charge:+ 2, Modification: , Mod Position:

Score: 55.03, Raw data:WET\_B1\_090616\_03.mzxml, MS/MS Elution time: 74.04951, Scan number:4096, Mass delta:-0.0083, Rank:1

| No | b      | b++   | b* | b*++ | b0 | b0++ | Seq | y | y++ | y* | y*++ | y0 | y0++ | RevNo |
|----|--------|-------|----|------|----|------|-----|---|-----|----|------|----|------|-------|
| 1  | 114.09 | 57.55 |    |      |    |      | L   |   |     |    |      |    |      | 10    |



|    |        |        |        |        |   |        |        |        |        |        |        |   |
|----|--------|--------|--------|--------|---|--------|--------|--------|--------|--------|--------|---|
| 4  | 385.21 | 193.11 | 367.2  | 184.1  | P | 852.41 | 426.71 | 835.38 | 418.2  | 834.4  | 417.7  | 8 |
| 5  | 486.26 | 243.63 | 468.25 | 234.63 | T | 755.36 | 378.18 | 738.33 | 369.67 | 737.35 | 369.18 | 7 |
| 6  | 601.28 | 301.15 | 583.27 | 292.14 | D | 654.31 | 327.66 | 637.28 | 319.15 | 636.3  | 318.65 | 6 |
| 7  | 748.35 | 374.68 | 730.34 | 365.67 | F | 539.28 | 270.14 | 522.26 | 261.63 | 521.27 | 261.14 | 5 |
| 8  | 835.38 | 418.2  | 817.37 | 409.19 | S | 392.21 | 196.61 | 375.19 | 188.1  | 374.2  | 187.61 | 4 |
| 9  | 922.42 | 461.71 | 904.4  | 452.71 | S | 305.18 | 153.09 | 288.16 | 144.58 | 287.17 | 144.09 | 3 |
| 10 | 993.45 | 497.23 | 975.44 | 488.22 | A | 218.15 | 109.58 | 201.12 | 101.07 |        |        | 2 |
| 11 |        |        |        |        | K | 147.11 | 74.06  | 130.09 | 65.55  |        |        | 1 |

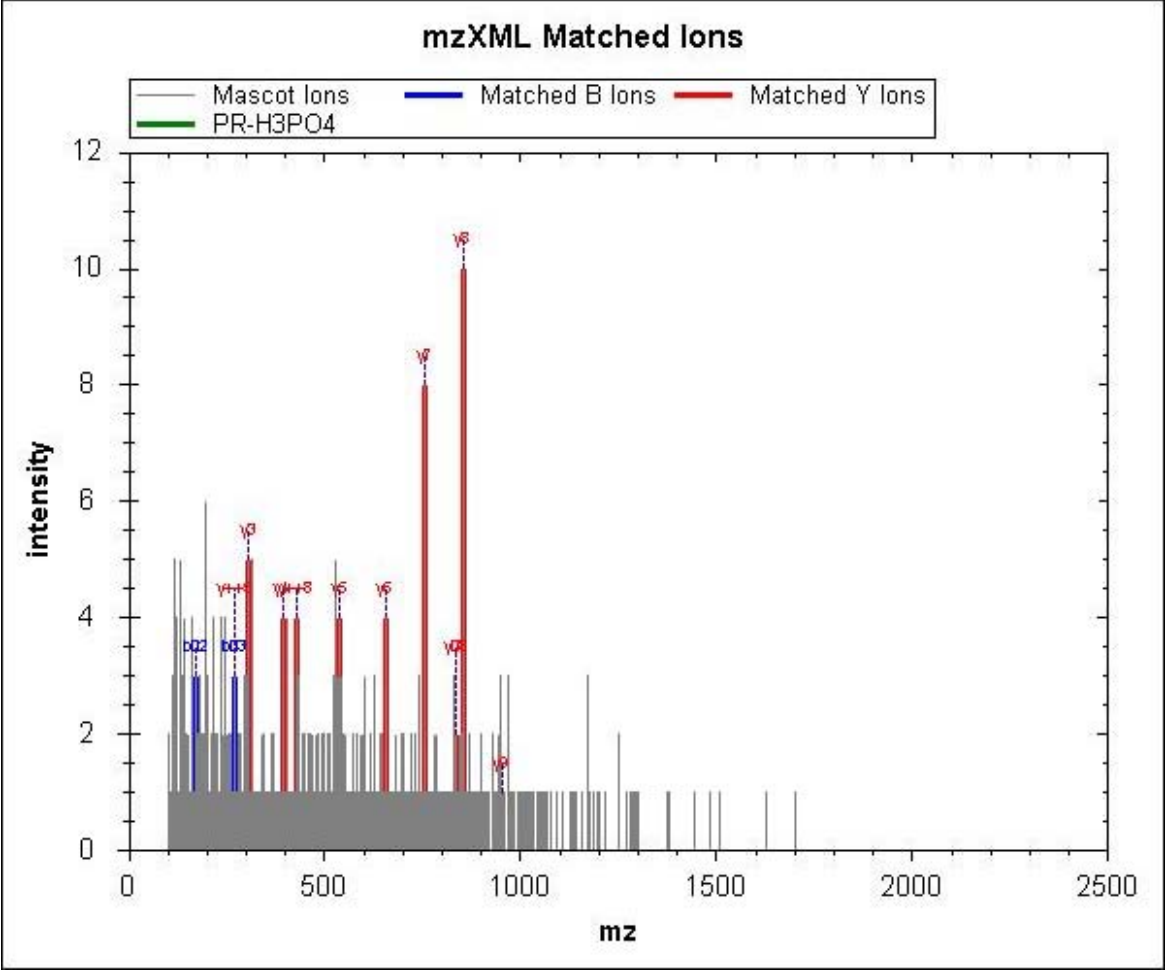

Protein index=382, ACC No:IPI00290410

Peptide index=6071 MS/MS spectrum

Sequence: TIVEELLADSEFR, m/z:761.3967, charge:+ 2, Modification: , Mod Position:

Score: 92.99, Raw data:WET\_B2\_090616\_01.mzxml, MS/MS Elution time: 81.93133, Scan number:4522, Mass delta:0.0041, Rank:1

| No | b      | b++    | b0     | b0++   | Seq | y       | y++    | y*      | y*++   | y0      | y0++   | RevNo |
|----|--------|--------|--------|--------|-----|---------|--------|---------|--------|---------|--------|-------|
| 1  | 102.05 | 51.53  | 84.04  | 42.53  | T   |         |        |         |        |         |        | 13    |
| 2  | 215.14 | 108.07 | 197.13 | 99.07  | I   | 1420.73 | 710.87 | 1403.71 | 702.36 | 1402.72 | 701.86 | 12    |
| 3  | 314.21 | 157.61 | 296.2  | 148.6  | V   | 1307.65 | 654.33 | 1290.62 | 645.81 | 1289.64 | 645.32 | 11    |
| 4  | 443.25 | 222.13 | 425.24 | 213.12 | E   | 1208.58 | 604.79 | 1191.55 | 596.28 | 1190.57 | 595.79 | 10    |

|    |         |        |         |        |   |         |        |         |        |         |        |   |
|----|---------|--------|---------|--------|---|---------|--------|---------|--------|---------|--------|---|
| 5  | 572.29  | 286.65 | 554.28  | 277.64 | E | 1079.54 | 540.27 | 1062.51 | 531.76 | 1061.53 | 531.27 | 9 |
| 6  | 685.38  | 343.19 | 667.37  | 334.19 | L | 950.49  | 475.75 | 933.47  | 467.24 | 932.48  | 466.75 | 8 |
| 7  | 798.46  | 399.73 | 780.45  | 390.73 | L | 837.41  | 419.21 | 820.38  | 410.7  | 819.4   | 410.2  | 7 |
| 8  | 869.5   | 435.25 | 851.49  | 426.25 | A | 724.33  | 362.67 | 707.3   | 354.15 | 706.32  | 353.66 | 6 |
| 9  | 984.52  | 492.77 | 966.51  | 483.76 | D | 653.29  | 327.15 | 636.26  | 318.63 | 635.28  | 318.14 | 5 |
| 10 | 1071.56 | 536.28 | 1053.55 | 527.28 | S | 538.26  | 269.63 | 521.24  | 261.12 | 520.25  | 260.63 | 4 |
| 11 | 1200.6  | 600.8  | 1182.59 | 591.8  | E | 451.23  | 226.12 | 434.2   | 217.61 | 433.22  | 217.11 | 3 |
| 12 | 1347.67 | 674.34 | 1329.66 | 665.33 | F | 322.19  | 161.6  | 305.16  | 153.08 |         |        | 2 |
| 13 |         |        |         |        | R | 175.12  | 88.06  | 158.09  | 79.55  |         |        | 1 |

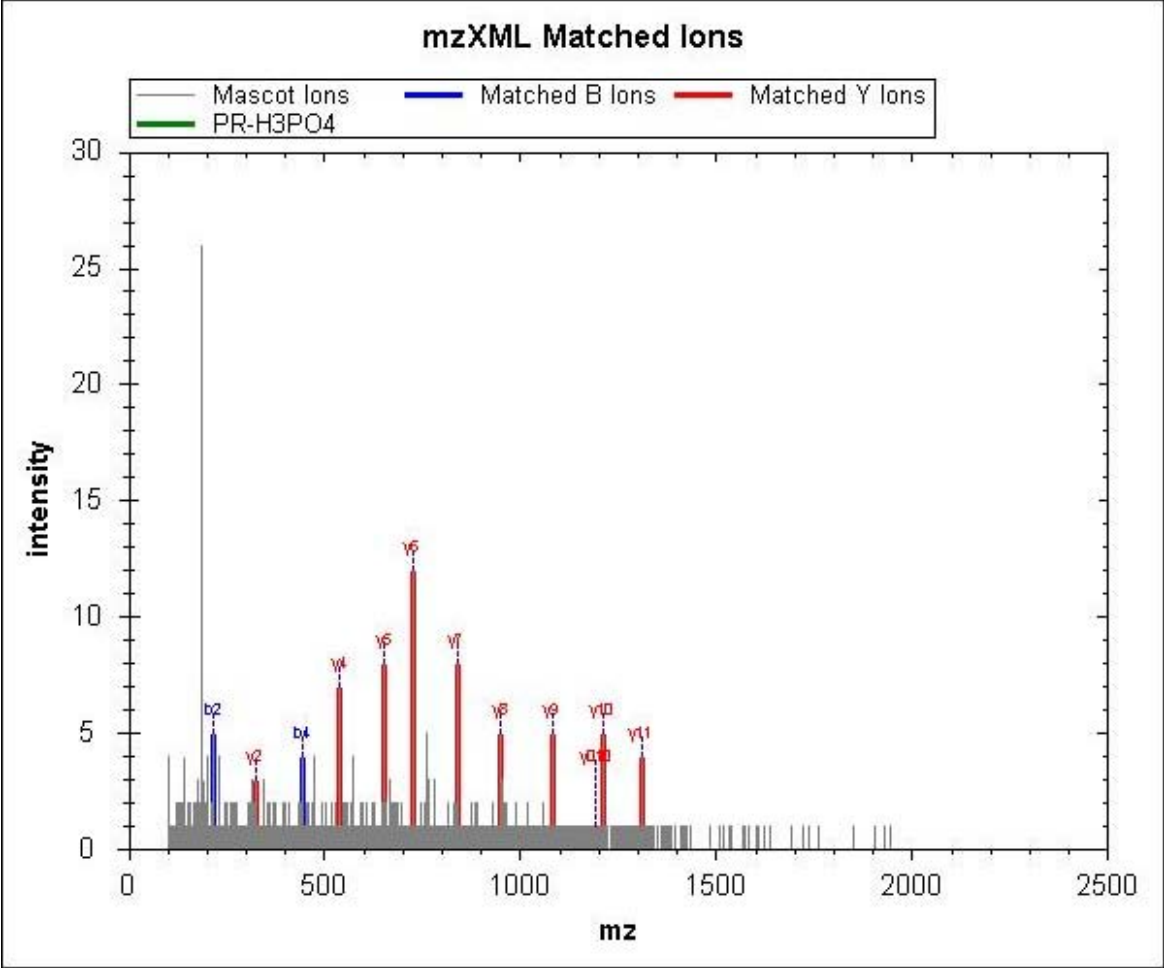

Protein index=383, ACC No:IPI00020008

Peptide index=6332 MS/MS spectrum

Sequence: ILGGSVLHLVLALR, m/z:487.6477, charge:+ 3, Modification: , Mod Position:

Score: 43.45, Raw data:WET\_A2\_090616\_01.mzxml, MS/MS Elution time: 86.3235, Scan number:4786, Mass delta:-0.0027, Rank:1

| No | b      | b++    | b0 | b0++ | Seq | y       | y++    | y*      | y*++   | y0      | y0++   | RevNo |
|----|--------|--------|----|------|-----|---------|--------|---------|--------|---------|--------|-------|
| 1  | 114.09 | 57.55  |    |      | I   |         |        |         |        |         |        | 14    |
| 2  | 227.18 | 114.09 |    |      | L   | 1347.85 | 674.43 | 1330.82 | 665.91 | 1329.84 | 665.42 | 13    |
| 3  | 284.2  | 142.6  |    |      | G   | 1234.76 | 617.89 | 1217.74 | 609.37 | 1216.75 | 608.88 | 12    |

|    |         |        |         |        |   |         |        |         |        |         |        |    |
|----|---------|--------|---------|--------|---|---------|--------|---------|--------|---------|--------|----|
| 4  | 341.22  | 171.11 |         |        | G | 1177.74 | 589.37 | 1160.71 | 580.86 | 1159.73 | 580.37 | 11 |
| 5  | 428.25  | 214.63 | 410.24  | 205.62 | S | 1120.72 | 560.86 | 1103.69 | 552.35 | 1102.71 | 551.86 | 10 |
| 6  | 527.32  | 264.16 | 509.31  | 255.16 | V | 1033.69 | 517.35 | 1016.66 | 508.83 |         |        | 9  |
| 7  | 640.4   | 320.71 | 622.39  | 311.7  | L | 934.62  | 467.81 | 917.59  | 459.3  |         |        | 8  |
| 8  | 777.46  | 389.23 | 759.45  | 380.23 | H | 821.54  | 411.27 | 804.51  | 402.76 |         |        | 7  |
| 9  | 890.55  | 445.78 | 872.54  | 436.77 | L | 684.48  | 342.74 | 667.45  | 334.23 |         |        | 6  |
| 10 | 989.61  | 495.31 | 971.6   | 486.31 | V | 571.39  | 286.2  | 554.37  | 277.69 |         |        | 5  |
| 11 | 1102.7  | 551.85 | 1084.69 | 542.85 | L | 472.32  | 236.67 | 455.3   | 228.15 |         |        | 4  |
| 12 | 1173.74 | 587.37 | 1155.72 | 578.37 | A | 359.24  | 180.12 | 342.21  | 171.61 |         |        | 3  |
| 13 | 1286.82 | 643.91 | 1268.81 | 634.91 | L | 288.2   | 144.61 | 271.18  | 136.09 |         |        | 2  |
| 14 |         |        |         |        | R | 175.12  | 88.06  | 158.09  | 79.55  |         |        | 1  |

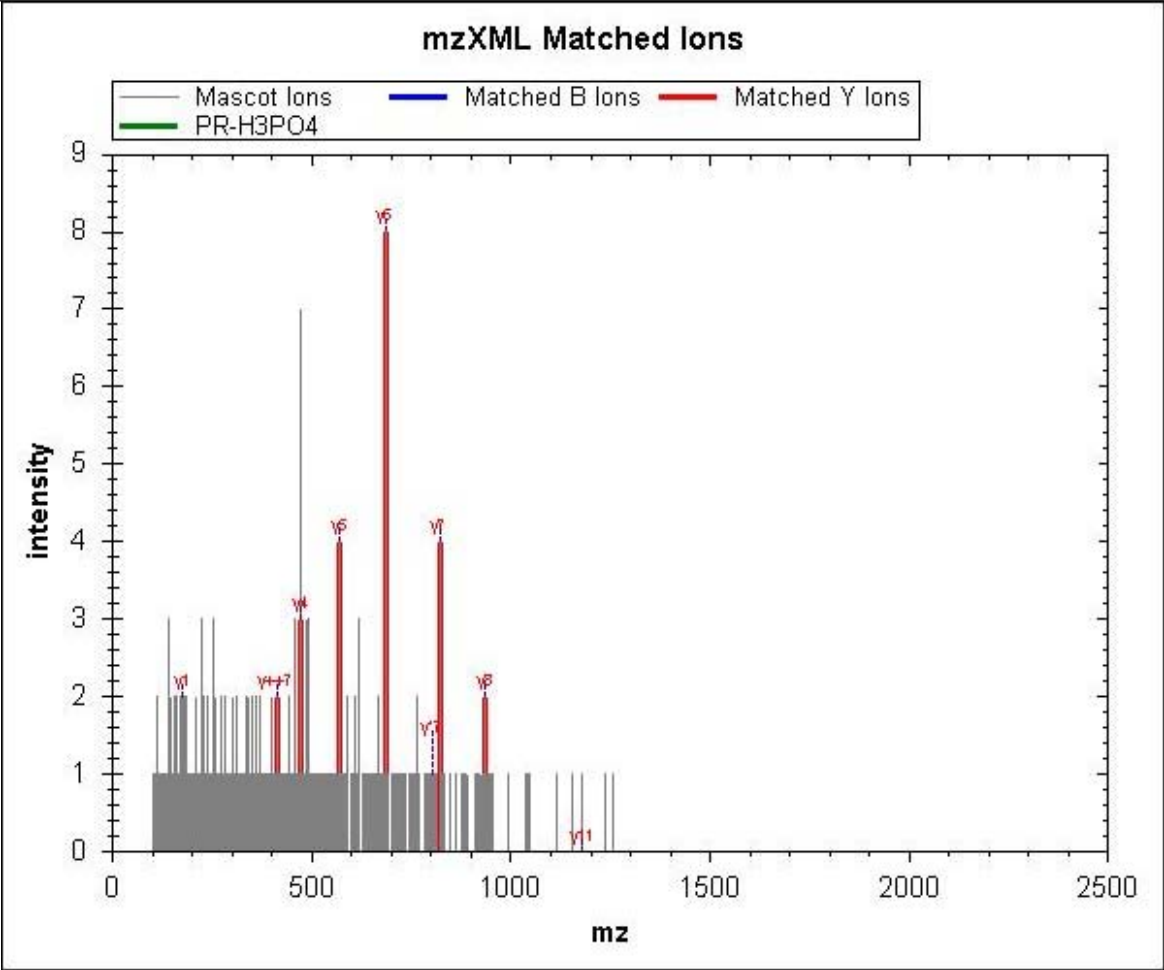

Protein index=396, ACC No:IPI00293845

Peptide index=6922 MS/MS spectrum

Sequence: SGSFINSLLQLEELGFR, m/z:955.511, charge:+ 2, Modification: , Mod Position:

Score: 50.27, Raw data:WET\_B2\_090616\_02.mzxml, MS/MS Elution time: 100.2323, Scan number:5635, Mass delta:0.0099, Rank:1

| No | b     | b++   | b* | b*++ | b0    | b0++  | Seq | y | y++ | y* | y*++ | y0 | y0++ | RevNo |
|----|-------|-------|----|------|-------|-------|-----|---|-----|----|------|----|------|-------|
| 1  | 88.04 | 44.52 |    |      | 70.03 | 35.52 | S   |   |     |    |      |    |      | 17    |

|    |         |        |         |        |         |        |   |         |        |         |        |         |        |    |
|----|---------|--------|---------|--------|---------|--------|---|---------|--------|---------|--------|---------|--------|----|
| 2  | 145.06  | 73.03  |         |        | 127.05  | 64.03  | G | 1822.97 | 911.99 | 1805.94 | 903.48 | 1804.96 | 902.98 | 16 |
| 3  | 232.09  | 116.55 |         |        | 214.08  | 107.54 | S | 1765.95 | 883.48 | 1748.92 | 874.96 | 1747.94 | 874.47 | 15 |
| 4  | 379.16  | 190.08 |         |        | 361.15  | 181.08 | F | 1678.92 | 839.96 | 1661.89 | 831.45 | 1660.91 | 830.96 | 14 |
| 5  | 492.25  | 246.63 |         |        | 474.23  | 237.62 | I | 1531.85 | 766.43 | 1514.82 | 757.91 | 1513.84 | 757.42 | 13 |
| 6  | 606.29  | 303.65 | 589.26  | 295.13 | 588.28  | 294.64 | N | 1418.76 | 709.89 | 1401.74 | 701.37 | 1400.75 | 700.88 | 12 |
| 7  | 693.32  | 347.16 | 676.29  | 338.65 | 675.31  | 338.16 | S | 1304.72 | 652.86 | 1287.69 | 644.35 | 1286.71 | 643.86 | 11 |
| 8  | 806.4   | 403.71 | 789.38  | 395.19 | 788.39  | 394.7  | L | 1217.69 | 609.35 | 1200.66 | 600.83 | 1199.68 | 600.34 | 10 |
| 9  | 919.49  | 460.25 | 902.46  | 451.73 | 901.48  | 451.24 | L | 1104.6  | 552.81 | 1087.58 | 544.29 | 1086.59 | 543.8  | 9  |
| 10 | 1047.55 | 524.28 | 1030.52 | 515.76 | 1029.54 | 515.27 | Q | 991.52  | 496.26 | 974.49  | 487.75 | 973.51  | 487.26 | 8  |
| 11 | 1160.63 | 580.82 | 1143.6  | 572.31 | 1142.62 | 571.81 | L | 863.46  | 432.23 | 846.44  | 423.72 | 845.45  | 423.23 | 7  |
| 12 | 1289.67 | 645.34 | 1272.65 | 636.83 | 1271.66 | 636.34 | E | 750.38  | 375.69 | 733.35  | 367.18 | 732.37  | 366.69 | 6  |
| 13 | 1418.72 | 709.86 | 1401.69 | 701.35 | 1400.71 | 700.86 | E | 621.34  | 311.17 | 604.31  | 302.66 | 603.32  | 302.17 | 5  |
| 14 | 1531.8  | 766.4  | 1514.77 | 757.89 | 1513.79 | 757.4  | L | 492.29  | 246.65 | 475.27  | 238.14 |         |        | 4  |
| 15 | 1588.82 | 794.91 | 1571.8  | 786.4  | 1570.81 | 785.91 | G | 379.21  | 190.11 | 362.18  | 181.59 |         |        | 3  |
| 16 | 1735.89 | 868.45 | 1718.86 | 859.94 | 1717.88 | 859.44 | F | 322.19  | 161.6  | 305.16  | 153.08 |         |        | 2  |
| 17 |         |        |         |        |         |        | R | 175.12  | 88.06  | 158.09  | 79.55  |         |        | 1  |

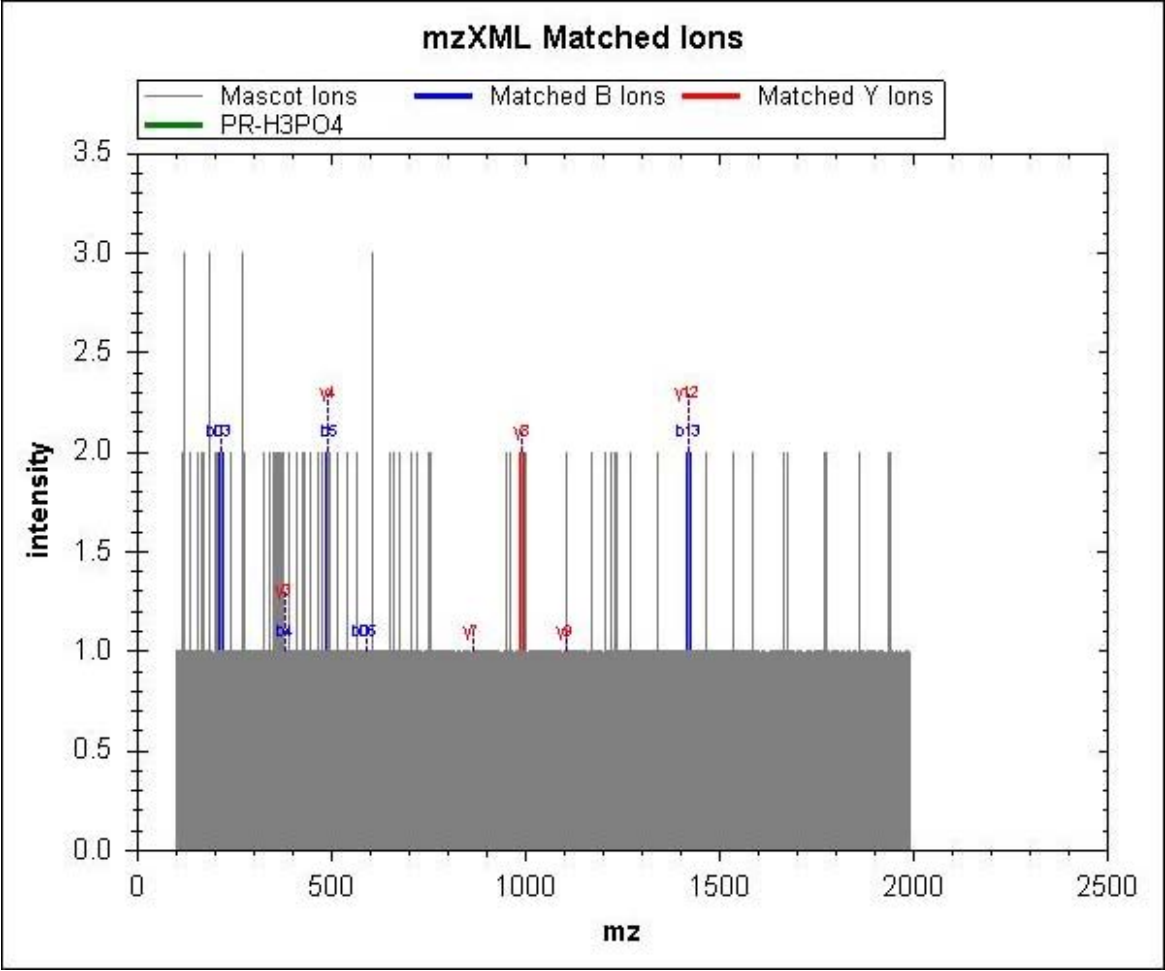

Protein index=400, ACC No:IPI00788958

Peptide index=4373 MS/MS spectrum

Sequence: SDIGEVIPVGGMTR, m/z:723.8804, charge:+ 2, Modification: Oxidation (M), Mod Position:

0.00000000000100.0

Score: 51.51, Raw data:WET\_B3\_090616\_01.mzxml, MS/MS Elution time: 61.537, Scan number:3340, Mass delta:0.0197, Rank:2

| No | b       | b++    | b0      | b0++   | Seq | y       | y++    | y*      | y*++   | y0      | y0++   | RevNo |
|----|---------|--------|---------|--------|-----|---------|--------|---------|--------|---------|--------|-------|
| 1  | 88.04   | 44.52  | 70.03   | 35.52  | S   |         |        |         |        |         |        | 14    |
| 2  | 203.07  | 102.04 | 185.06  | 93.03  | D   | 1359.69 | 680.35 | 1342.67 | 671.84 | 1341.68 | 671.35 | 13    |
| 3  | 316.15  | 158.58 | 298.14  | 149.57 | I   | 1244.67 | 622.84 | 1227.64 | 614.32 | 1226.66 | 613.83 | 12    |
| 4  | 373.17  | 187.09 | 355.16  | 178.08 | G   | 1131.58 | 566.29 | 1114.56 | 557.78 | 1113.57 | 557.29 | 11    |
| 5  | 502.21  | 251.61 | 484.2   | 242.61 | E   | 1074.56 | 537.78 | 1057.53 | 529.27 | 1056.55 | 528.78 | 10    |
| 6  | 601.28  | 301.14 | 583.27  | 292.14 | V   | 945.52  | 473.26 | 928.49  | 464.75 | 927.51  | 464.26 | 9     |
| 7  | 714.37  | 357.69 | 696.36  | 348.68 | I   | 846.45  | 423.73 | 829.42  | 415.22 | 828.44  | 414.72 | 8     |
| 8  | 811.42  | 406.21 | 793.41  | 397.21 | P   | 733.37  | 367.19 | 716.34  | 358.67 | 715.36  | 358.18 | 7     |
| 9  | 910.49  | 455.75 | 892.48  | 446.74 | V   | 636.31  | 318.66 | 619.29  | 310.15 | 618.3   | 309.66 | 6     |
| 10 | 967.51  | 484.26 | 949.5   | 475.25 | B   | 537.24  | 269.13 | 520.22  | 260.61 | 519.23  | 260.12 | 5     |
| 11 | 1024.53 | 512.77 | 1006.52 | 503.76 | G   | 480.22  | 240.62 | 463.2   | 232.1  | 462.21  | 231.61 | 4     |
| 12 | 1171.57 | 586.29 | 1153.56 | 577.28 | M   | 423.2   | 212.1  | 406.18  | 203.59 | 405.19  | 203.1  | 3     |
| 13 | 1272.61 | 636.81 | 1254.6  | 627.81 | T   | 276.17  | 138.59 | 259.14  | 130.07 | 258.16  | 129.58 | 2     |
| 14 |         |        |         |        | R   | 175.12  | 88.06  | 158.09  | 79.55  |         |        | 1     |

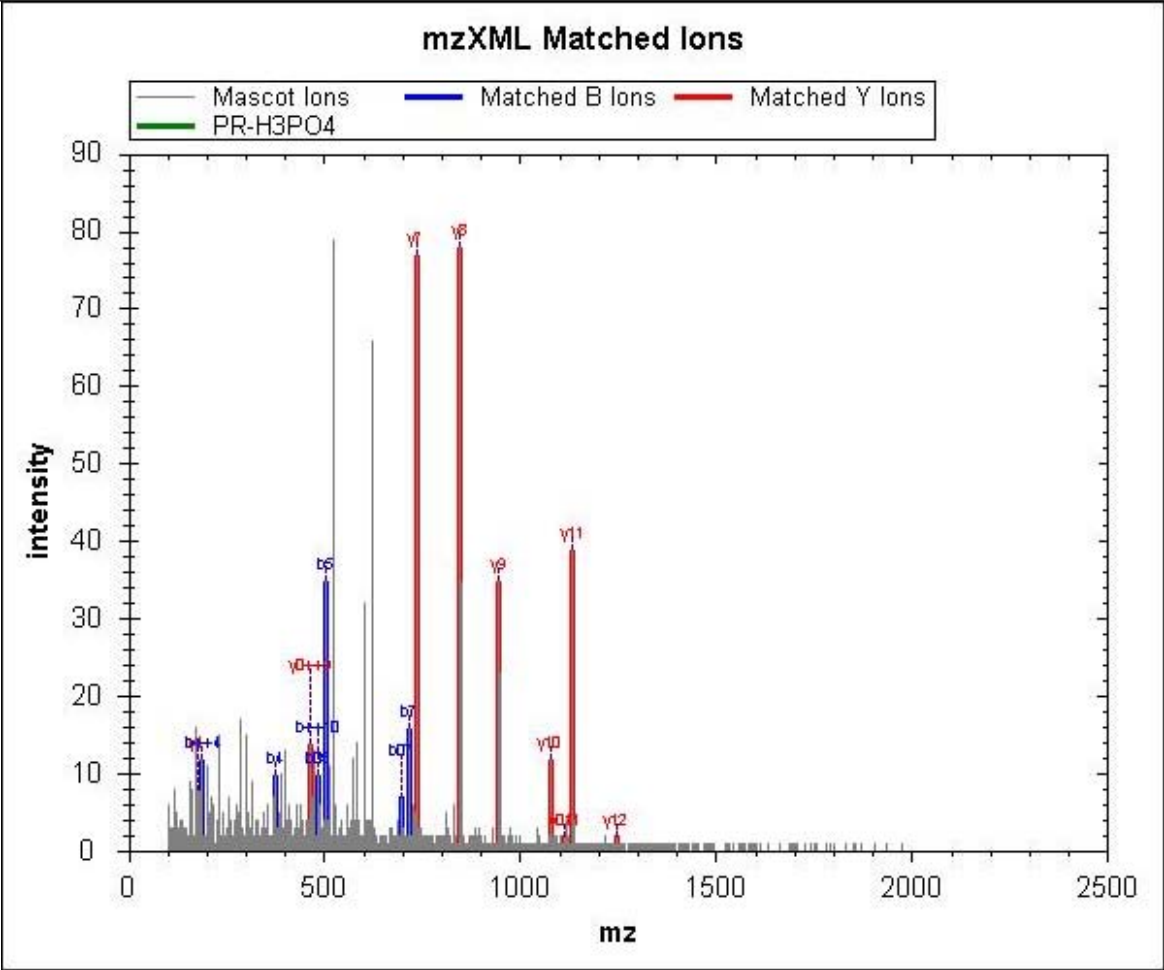

Protein index=401, ACC No:IPI00024364

Peptide index=4609 MS/MS spectrum

Sequence: ATVGILITTIASK, m/z:644.3967, charge:+ 2, Modification: , Mod Position:

Score: 78.43, Raw data:WET\_B2\_090616\_03.mzxml, MS/MS Elution time: 63.71067, Scan number:3466, Mass delta:-0.0076, Rank:1

| No | b       | b++    | b0      | b0++   | Seq | y       | y++    | y*      | y*++   | y0      | y0++   | RevNo |
|----|---------|--------|---------|--------|-----|---------|--------|---------|--------|---------|--------|-------|
| 1  | 72.04   | 36.53  |         |        | A   |         |        |         |        |         |        | 13    |
| 2  | 173.09  | 87.05  | 155.08  | 78.04  | T   | 1216.75 | 608.88 | 1199.72 | 600.37 | 1198.74 | 599.87 | 12    |
| 3  | 272.16  | 136.58 | 254.15  | 127.58 | V   | 1115.7  | 558.36 | 1098.68 | 549.84 | 1097.69 | 549.35 | 11    |
| 4  | 329.18  | 165.09 | 311.17  | 156.09 | G   | 1016.63 | 508.82 | 999.61  | 500.31 | 998.62  | 499.82 | 10    |
| 5  | 442.27  | 221.64 | 424.26  | 212.63 | I   | 959.61  | 480.31 | 942.59  | 471.8  | 941.6   | 471.31 | 9     |
| 6  | 555.35  | 278.18 | 537.34  | 269.17 | L   | 846.53  | 423.77 | 829.5   | 415.26 | 828.52  | 414.76 | 8     |
| 7  | 668.43  | 334.72 | 650.42  | 325.72 | I   | 733.45  | 367.23 | 716.42  | 358.71 | 715.43  | 358.22 | 7     |
| 8  | 769.48  | 385.24 | 751.47  | 376.24 | T   | 620.36  | 310.68 | 603.33  | 302.17 | 602.35  | 301.68 | 6     |
| 9  | 870.53  | 435.77 | 852.52  | 426.76 | T   | 519.31  | 260.16 | 502.29  | 251.65 | 501.3   | 251.16 | 5     |
| 10 | 983.61  | 492.31 | 965.6   | 483.31 | I   | 418.27  | 209.64 | 401.24  | 201.12 | 400.26  | 200.63 | 4     |
| 11 | 1054.65 | 527.83 | 1036.64 | 518.82 | A   | 305.18  | 153.09 | 288.16  | 144.58 | 287.17  | 144.09 | 3     |
| 12 | 1141.68 | 571.34 | 1123.67 | 562.34 | S   | 234.14  | 117.58 | 217.12  | 109.06 | 216.13  | 108.57 | 2     |
| 13 |         |        |         |        | K   | 147.11  | 74.06  | 130.09  | 65.55  |         |        | 1     |

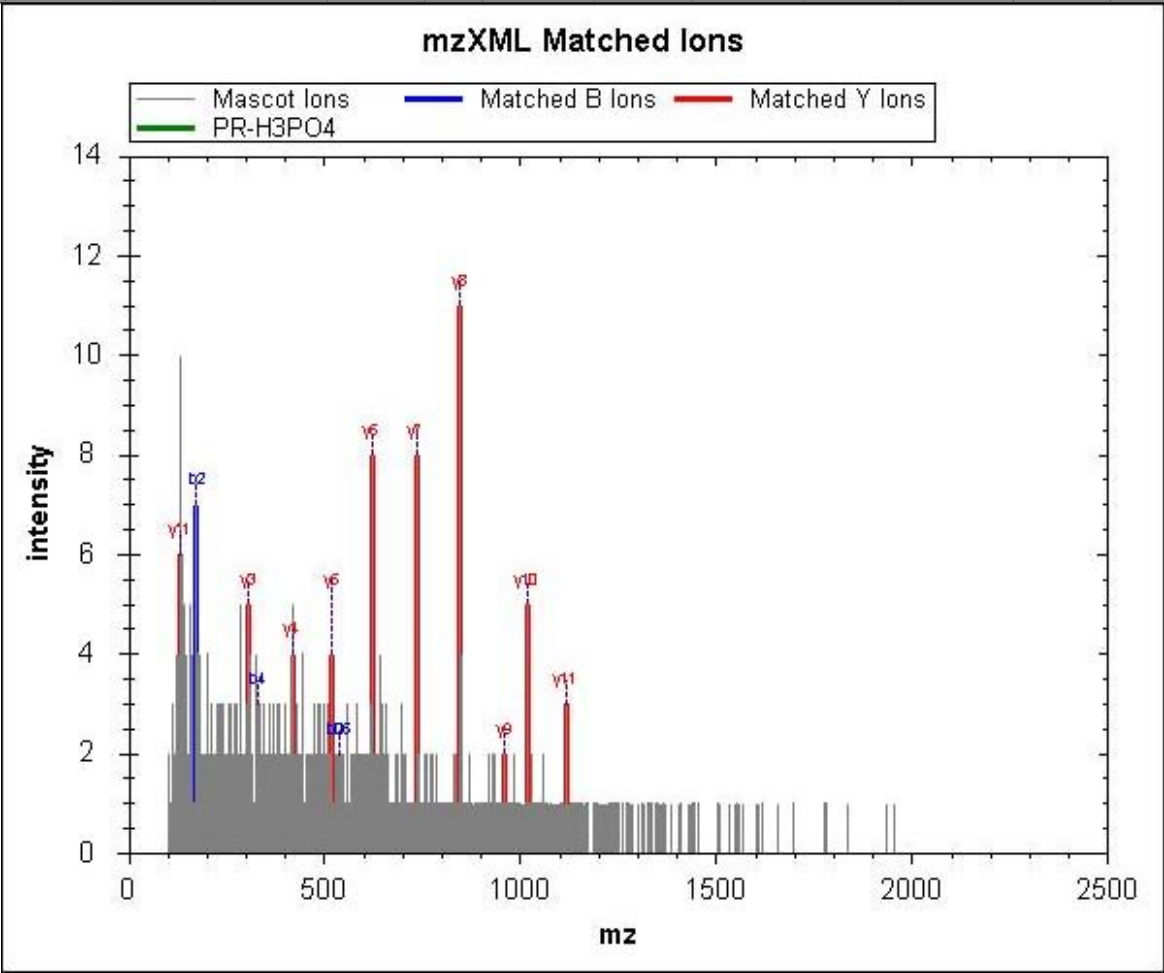

Protein index=415, ACC No:IPI00302151

Peptide index=1498 MS/MS spectrum

Sequence: ELKSIPR, m/z:421.7498, charge:+ 2, Modification: , Mod Position:

Score: 43.24, Raw data:WET\_A4\_090615\_02.mzxml, MS/MS Elution time: 33.913, Scan number:1741, Mass delta:-0.0131, Rank:1

| No | b      | b++    | b*     | b*++   | b0     | b0++   | Seq | y      | y++    | y*     | y*++   | y0     | y0++   | RevNo |
|----|--------|--------|--------|--------|--------|--------|-----|--------|--------|--------|--------|--------|--------|-------|
| 1  | 130.05 | 65.53  |        |        | 112.04 | 56.52  | E   |        |        |        |        |        |        | 7     |
| 2  | 243.13 | 122.07 |        |        | 225.12 | 113.07 | L   | 713.47 | 357.24 | 696.44 | 348.72 | 695.46 | 348.23 | 6     |
| 3  | 371.23 | 186.12 | 354.2  | 177.6  | 353.22 | 177.11 | K   | 600.38 | 300.7  | 583.36 | 292.18 | 582.37 | 291.69 | 5     |
| 4  | 458.26 | 229.63 | 441.23 | 221.12 | 440.25 | 220.63 | S   | 472.29 | 236.65 | 455.26 | 228.13 | 454.28 | 227.64 | 4     |
| 5  | 571.34 | 286.18 | 554.32 | 277.66 | 553.33 | 277.17 | I   | 385.26 | 193.13 | 368.23 | 184.62 |        |        | 3     |
| 6  | 668.4  | 334.7  | 651.37 | 326.19 | 650.39 | 325.7  | P   | 272.17 | 136.59 | 255.15 | 128.08 |        |        | 2     |
| 7  |        |        |        |        |        |        | R   | 175.12 | 88.06  | 158.09 | 79.55  |        |        | 1     |

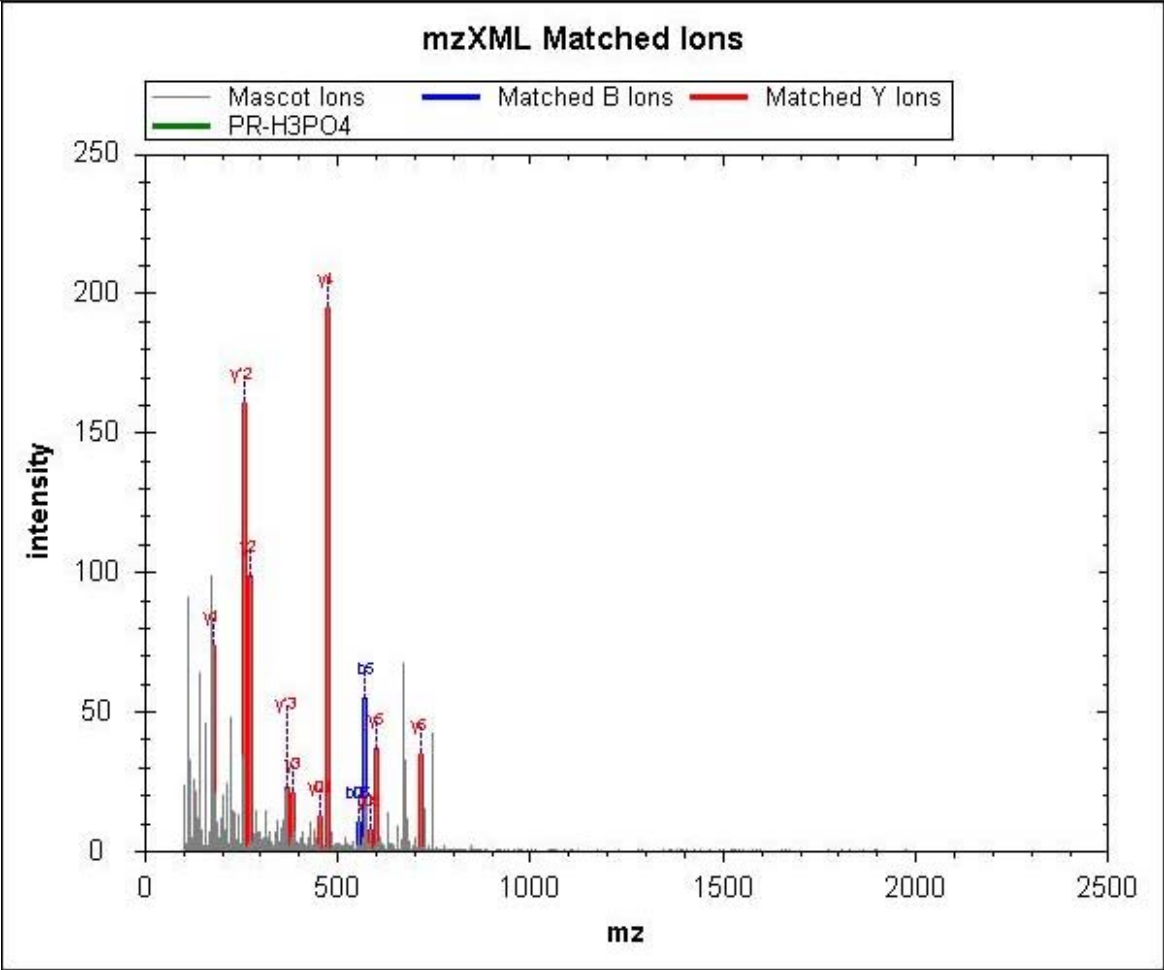

Protein index=418, ACC No:IPI00004503

Peptide index=6375 MS/MS spectrum

Sequence: FFLQGIQLNTILPDAR, m/z:923.5154, charge:+ 2, Modification: , Mod Position:



Peptide index=6899 MS/MS spectrum

Sequence: TLFSFLGEIEELR, m/z:777.4196, charge:+ 2, Modification: , Mod Position:

Score: 60.88, Raw data:WET\_B2\_090616\_03.mzxml, MS/MS Elution time: 99.53349, Scan number:5553, Mass delta:0.0302, Rank:1

| No | b       | b++    | b0      | b0++   | Seq | y       | y++    | y*      | y*++   | y0      | y0++   | RevNo |
|----|---------|--------|---------|--------|-----|---------|--------|---------|--------|---------|--------|-------|
| 1  | 102.05  | 51.53  | 84.04   | 42.53  | T   |         |        |         |        |         |        | 13    |
| 2  | 215.14  | 108.07 | 197.13  | 99.07  | L   | 1452.77 | 726.89 | 1435.75 | 718.38 | 1434.76 | 717.89 | 12    |
| 3  | 362.21  | 181.61 | 344.2   | 172.6  | F   | 1339.69 | 670.35 | 1322.66 | 661.84 | 1321.68 | 661.34 | 11    |
| 4  | 449.24  | 225.12 | 431.23  | 216.12 | S   | 1192.62 | 596.81 | 1175.59 | 588.3  | 1174.61 | 587.81 | 10    |
| 5  | 596.31  | 298.66 | 578.3   | 289.65 | F   | 1105.59 | 553.3  | 1088.56 | 544.78 | 1087.58 | 544.29 | 9     |
| 6  | 709.39  | 355.2  | 691.38  | 346.19 | L   | 958.52  | 479.76 | 941.49  | 471.25 | 940.51  | 470.76 | 8     |
| 7  | 766.41  | 383.71 | 748.4   | 374.71 | G   | 845.44  | 423.22 | 828.41  | 414.71 | 827.43  | 414.22 | 7     |
| 8  | 895.46  | 448.23 | 877.45  | 439.23 | E   | 788.41  | 394.71 | 771.39  | 386.2  | 770.4   | 385.71 | 6     |
| 9  | 1008.54 | 504.77 | 990.53  | 495.77 | I   | 659.37  | 330.19 | 642.35  | 321.68 | 641.36  | 321.18 | 5     |
| 10 | 1137.58 | 569.29 | 1119.57 | 560.29 | E   | 546.29  | 273.65 | 529.26  | 265.13 | 528.28  | 264.64 | 4     |
| 11 | 1266.63 | 633.82 | 1248.61 | 624.81 | E   | 417.25  | 209.13 | 400.22  | 200.61 | 399.24  | 200.12 | 3     |
| 12 | 1379.71 | 690.36 | 1361.7  | 681.35 | L   | 288.2   | 144.61 | 271.18  | 136.09 |         |        | 2     |
| 13 |         |        |         |        | R   | 175.12  | 88.06  | 158.09  | 79.55  |         |        | 1     |

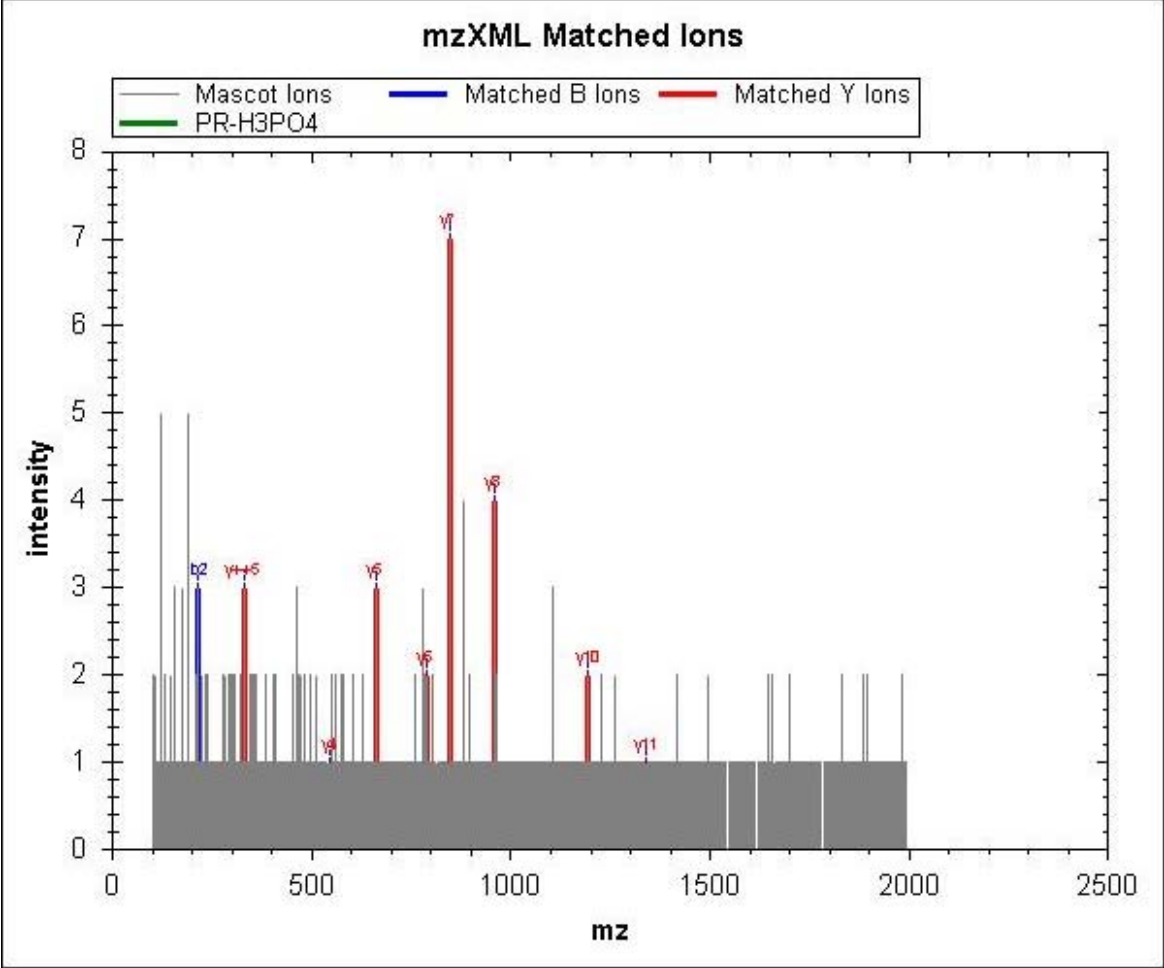

Protein index=423, ACC No:IP100182757

Peptide index=5362 MS/MS spectrum

Sequence: VLLLSPGLEELYR, m/z:794.9455, charge:+ 2, Modification: , Mod Position:

Score: 65.34, Raw data:WET\_B2\_090616\_02.mzxml, MS/MS Elution time: 72.45517, Scan number:4004, Mass delta:-0.008, Rank:1

| No | b       | b++    | b0      | b0++   | Seq | y       | y++    | y*      | y*++   | y0      | y0++   | RevNo |
|----|---------|--------|---------|--------|-----|---------|--------|---------|--------|---------|--------|-------|
| 1  | 100.08  | 50.54  |         |        | V   |         |        |         |        |         |        | 14    |
| 2  | 213.16  | 107.08 |         |        | L   | 1489.83 | 745.42 | 1472.8  | 736.9  | 1471.82 | 736.41 | 13    |
| 3  | 326.24  | 163.63 |         |        | L   | 1376.74 | 688.87 | 1359.72 | 680.36 | 1358.73 | 679.87 | 12    |
| 4  | 439.33  | 220.17 |         |        | L   | 1263.66 | 632.33 | 1246.63 | 623.82 | 1245.65 | 623.33 | 11    |
| 5  | 526.36  | 263.68 | 508.35  | 254.68 | S   | 1150.57 | 575.79 | 1133.55 | 567.28 | 1132.56 | 566.79 | 10    |
| 6  | 613.39  | 307.2  | 595.38  | 298.19 | S   | 1063.54 | 532.27 | 1046.52 | 523.76 | 1045.53 | 523.27 | 9     |
| 7  | 710.44  | 355.73 | 692.43  | 346.72 | P   | 976.51  | 488.76 | 959.48  | 480.25 | 958.5   | 479.75 | 8     |
| 8  | 767.47  | 384.24 | 749.46  | 375.23 | G   | 879.46  | 440.23 | 862.43  | 431.72 | 861.45  | 431.23 | 7     |
| 9  | 880.55  | 440.78 | 862.54  | 431.77 | L   | 822.44  | 411.72 | 805.41  | 403.21 | 804.42  | 402.72 | 6     |
| 10 | 1009.59 | 505.3  | 991.58  | 496.29 | E   | 709.35  | 355.18 | 692.32  | 346.67 | 691.34  | 346.17 | 5     |
| 11 | 1138.64 | 569.82 | 1120.62 | 560.82 | E   | 580.31  | 290.66 | 563.28  | 282.14 | 562.3   | 281.65 | 4     |
| 12 | 1251.72 | 626.36 | 1233.71 | 617.36 | L   | 451.27  | 226.14 | 434.24  | 217.62 |         |        | 3     |
| 13 | 1414.78 | 707.9  | 1396.77 | 698.89 | Y   | 338.18  | 169.59 | 321.16  | 161.08 |         |        | 2     |
| 14 |         |        |         |        | R   | 175.12  | 88.06  | 158.09  | 79.55  |         |        | 1     |

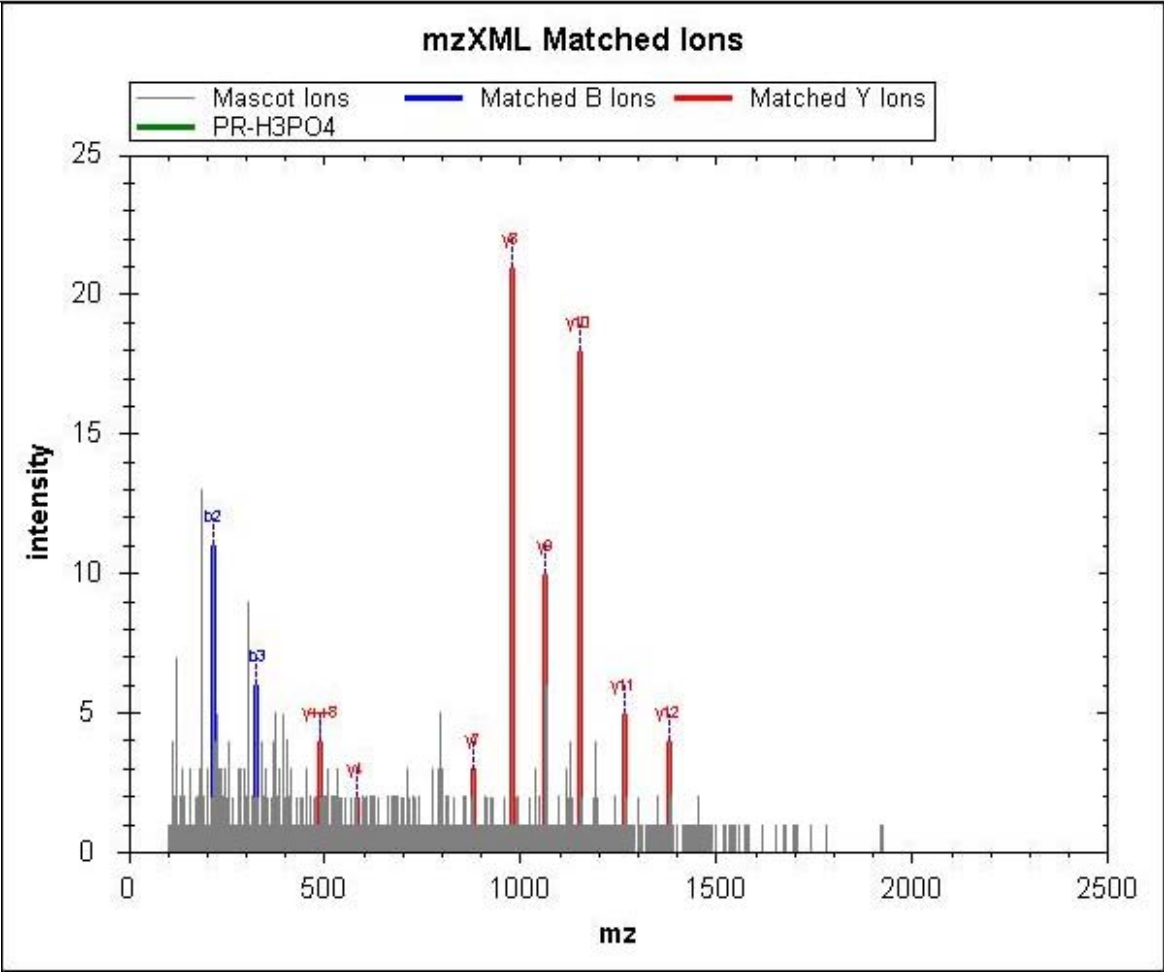

Protein index=427, ACC No:IPI00293073

Peptide index=6257 MS/MS spectrum

Sequence: VLLGLSEPIFQLPR, m/z:791.4684, charge:+ 2, Modification: , Mod Position:

Score: 35.53, Raw data:WET\_A2\_090616\_01.mzxml, MS/MS Elution time: 84.87516, Scan number:4702, Mass delta:-0.0067, Rank:1

| No | b       | b++    | b*      | b*++   | b0      | b0++   | Seq | y       | y++    | y*      | y*++   | y0      | y0++   | RevNo |
|----|---------|--------|---------|--------|---------|--------|-----|---------|--------|---------|--------|---------|--------|-------|
| 1  | 100.08  | 50.54  |         |        |         |        | V   |         |        |         |        |         |        | 14    |
| 2  | 213.16  | 107.08 |         |        |         |        | L   | 1482.87 | 741.94 | 1465.84 | 733.42 | 1464.86 | 732.93 | 13    |
| 3  | 326.24  | 163.63 |         |        |         |        | L   | 1369.78 | 685.4  | 1352.76 | 676.88 | 1351.77 | 676.39 | 12    |
| 4  | 383.27  | 192.14 |         |        |         |        | G   | 1256.7  | 628.85 | 1239.67 | 620.34 | 1238.69 | 619.85 | 11    |
| 5  | 496.35  | 248.68 |         |        |         |        | L   | 1199.68 | 600.34 | 1182.65 | 591.83 | 1181.67 | 591.34 | 10    |
| 6  | 583.38  | 292.19 |         |        | 565.37  | 283.19 | S   | 1086.59 | 543.8  | 1069.57 | 535.29 | 1068.58 | 534.8  | 9     |
| 7  | 712.42  | 356.72 |         |        | 694.41  | 347.71 | E   | 999.56  | 500.28 | 982.54  | 491.77 | 981.55  | 491.28 | 8     |
| 8  | 809.48  | 405.24 |         |        | 791.47  | 396.24 | P   | 870.52  | 435.76 | 853.49  | 427.25 |         |        | 7     |
| 9  | 922.56  | 461.78 |         |        | 904.55  | 452.78 | I   | 773.47  | 387.24 | 756.44  | 378.72 |         |        | 6     |
| 10 | 1069.63 | 535.32 |         |        | 1051.62 | 526.31 | F   | 660.38  | 330.7  | 643.36  | 322.18 |         |        | 5     |
| 11 | 1197.69 | 599.35 | 1180.66 | 590.83 | 1179.68 | 590.34 | Q   | 513.31  | 257.16 | 496.29  | 248.65 |         |        | 4     |
| 12 | 1310.77 | 655.89 | 1293.75 | 647.38 | 1292.76 | 646.88 | L   | 385.26  | 193.13 | 368.23  | 184.62 |         |        | 3     |

|    |         |        |        |       |         |        |   |        |        |        |        |  |   |
|----|---------|--------|--------|-------|---------|--------|---|--------|--------|--------|--------|--|---|
| 13 | 1407.82 | 704.42 | 1390.8 | 695.9 | 1389.81 | 695.41 | P | 272.17 | 136.59 | 255.15 | 128.08 |  | 2 |
| 14 |         |        |        |       |         |        | R | 175.12 | 88.06  | 158.09 | 79.55  |  | 1 |

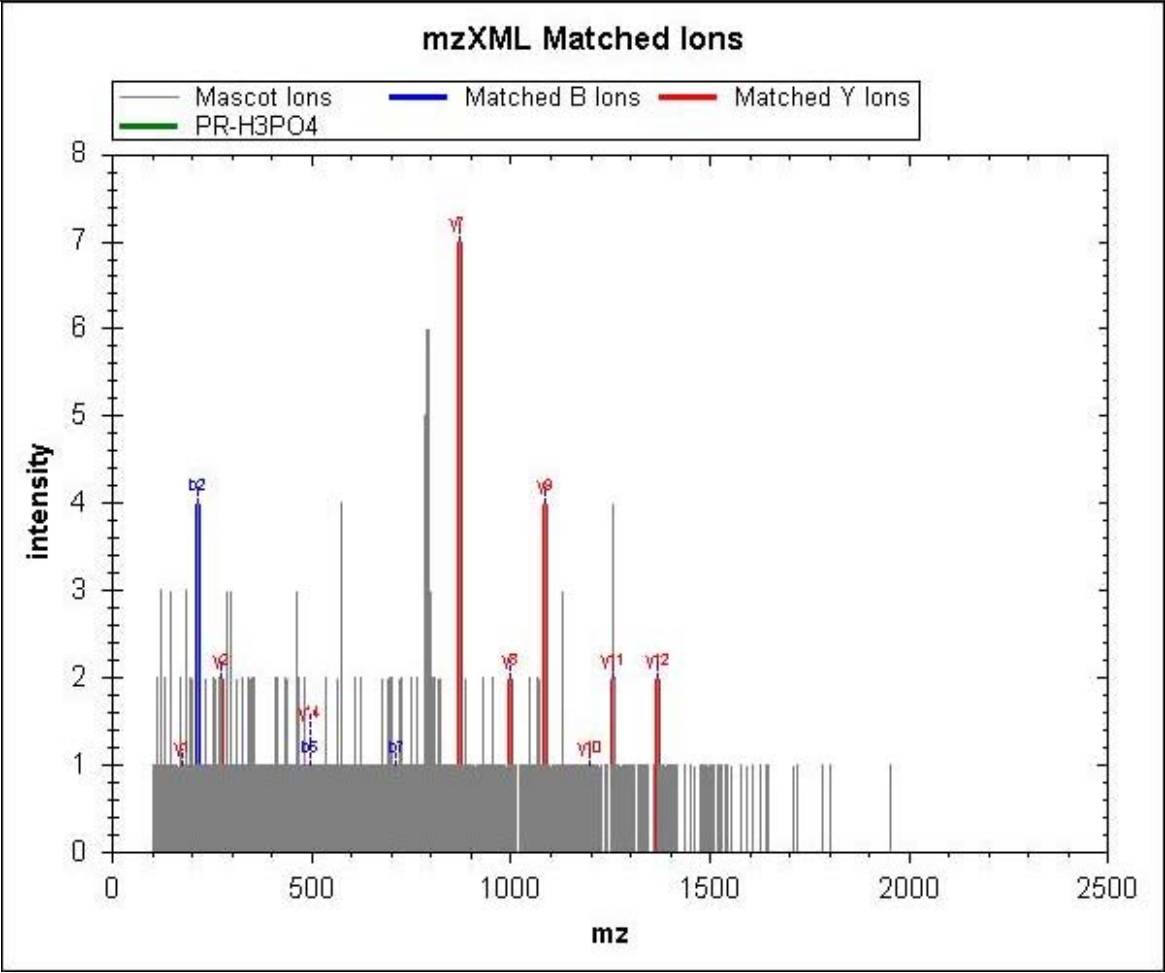

Protein index=434, ACC No:IPI00420004

Peptide index=7105 MS/MS spectrum

Sequence: LIPIVLLLQK, m/z:631.9475, charge:+ 2, Modification: , Mod Position:

Score: 44.9, Raw data:WET\_A2\_090616\_01.mzxml, MS/MS Elution time: 107.1575, Scan number:6038, Mass delta:0.0068, Rank:1

| No | b       | b++    | b*      | b*++   | Seq | y       | y++    | y*      | y*++   | RevNo |
|----|---------|--------|---------|--------|-----|---------|--------|---------|--------|-------|
| 1  | 114.09  | 57.55  |         |        | L   |         |        |         |        | 11    |
| 2  | 227.18  | 114.09 |         |        | I   | 1149.8  | 575.4  | 1132.77 | 566.89 | 10    |
| 3  | 324.23  | 162.62 |         |        | P   | 1036.71 | 518.86 | 1019.69 | 510.35 | 9     |
| 4  | 437.31  | 219.16 |         |        | I   | 939.66  | 470.33 | 922.63  | 461.82 | 8     |
| 5  | 550.4   | 275.7  |         |        | I   | 826.58  | 413.79 | 809.55  | 405.28 | 7     |
| 6  | 649.46  | 325.24 |         |        | V   | 713.49  | 357.25 | 696.47  | 348.74 | 6     |
| 7  | 762.55  | 381.78 |         |        | L   | 614.42  | 307.72 | 597.4   | 299.2  | 5     |
| 8  | 875.63  | 438.32 |         |        | L   | 501.34  | 251.17 | 484.31  | 242.66 | 4     |
| 9  | 988.72  | 494.86 |         |        | L   | 388.26  | 194.63 | 371.23  | 186.12 | 3     |
| 10 | 1116.78 | 558.89 | 1099.75 | 550.38 | Q   | 275.17  | 138.09 | 258.14  | 129.58 | 2     |

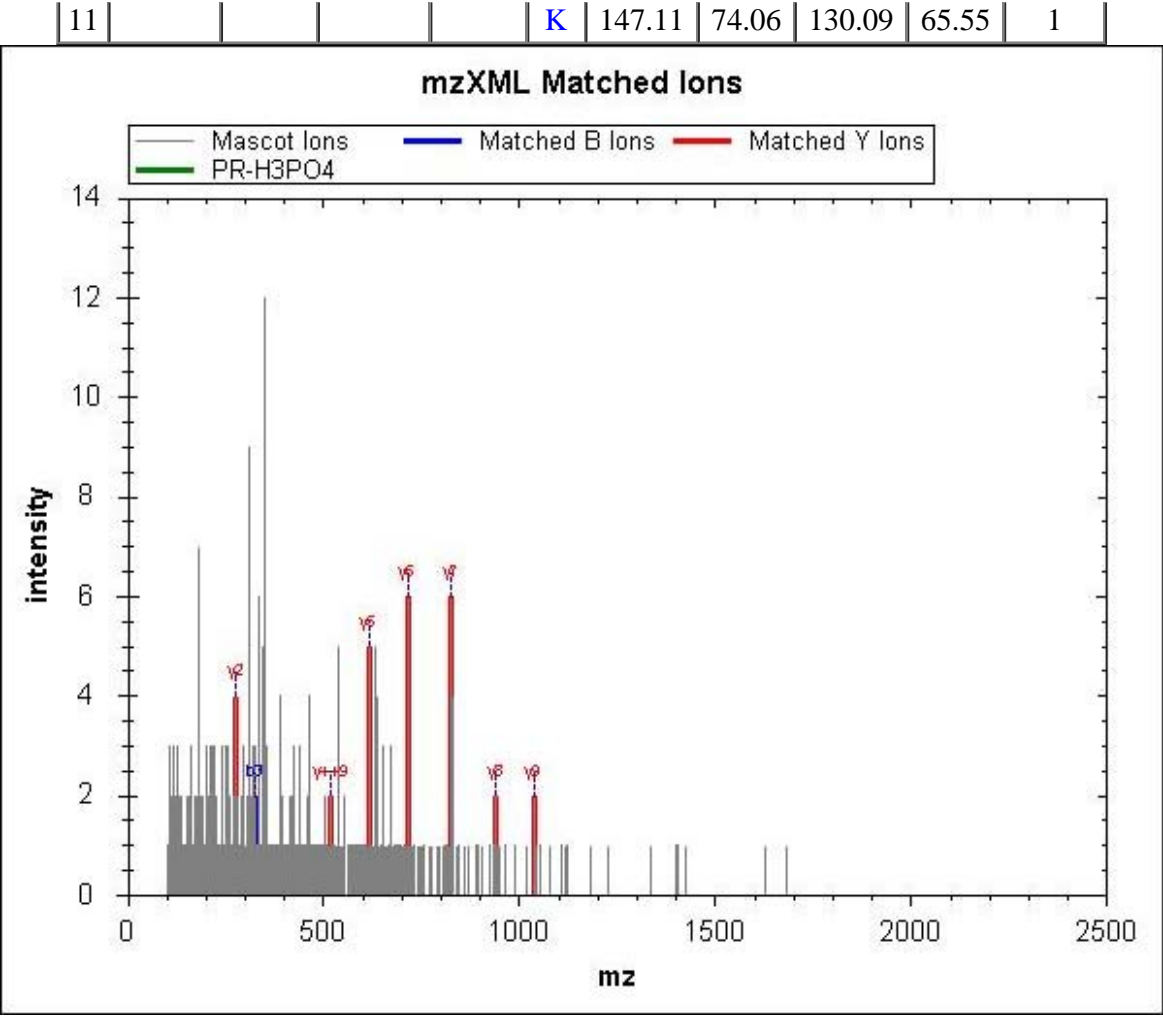

Protein index=435, ACC No:IPI00294903

Peptide index=340 MS/MS spectrum

Sequence: EKFVEALK, m/z:482.2665, charge:+ 2, Modification: , Mod Position:

Score: 58.96, Raw data:WET\_A2\_090616\_03.mzxml, MS/MS Elution time: 18.28, Scan number:826, Mass delta:-0.0842, Rank:1

| No | b      | b++    | b*     | b*++   | b0     | b0++   | Seq | y      | y++    | y*     | y*++   | y0     | y0++   | RevNo |
|----|--------|--------|--------|--------|--------|--------|-----|--------|--------|--------|--------|--------|--------|-------|
| 1  | 130.05 | 65.53  |        |        | 112.04 | 56.52  | E   |        |        |        |        |        |        | 8     |
| 2  | 258.14 | 129.58 | 241.12 | 121.06 | 240.13 | 120.57 | K   | 834.51 | 417.76 | 817.48 | 409.24 | 816.5  | 408.75 | 7     |
| 3  | 405.21 | 203.11 | 388.19 | 194.6  | 387.2  | 194.1  | F   | 706.41 | 353.71 | 689.39 | 345.2  | 688.4  | 344.71 | 6     |
| 4  | 504.28 | 252.64 | 487.26 | 244.13 | 486.27 | 243.64 | V   | 559.34 | 280.18 | 542.32 | 271.66 | 541.33 | 271.17 | 5     |
| 5  | 633.32 | 317.17 | 616.3  | 308.65 | 615.31 | 308.16 | E   | 460.28 | 230.64 | 443.25 | 222.13 | 442.27 | 221.64 | 4     |
| 6  | 704.36 | 352.68 | 687.33 | 344.17 | 686.35 | 343.68 | A   | 331.23 | 166.12 | 314.21 | 157.61 |        |        | 3     |
| 7  | 817.45 | 409.23 | 800.42 | 400.71 | 799.43 | 400.22 | L   | 260.2  | 130.6  | 243.17 | 122.09 |        |        | 2     |
| 8  |        |        |        |        |        |        | K   | 147.11 | 74.06  | 130.09 | 65.55  |        |        | 1     |

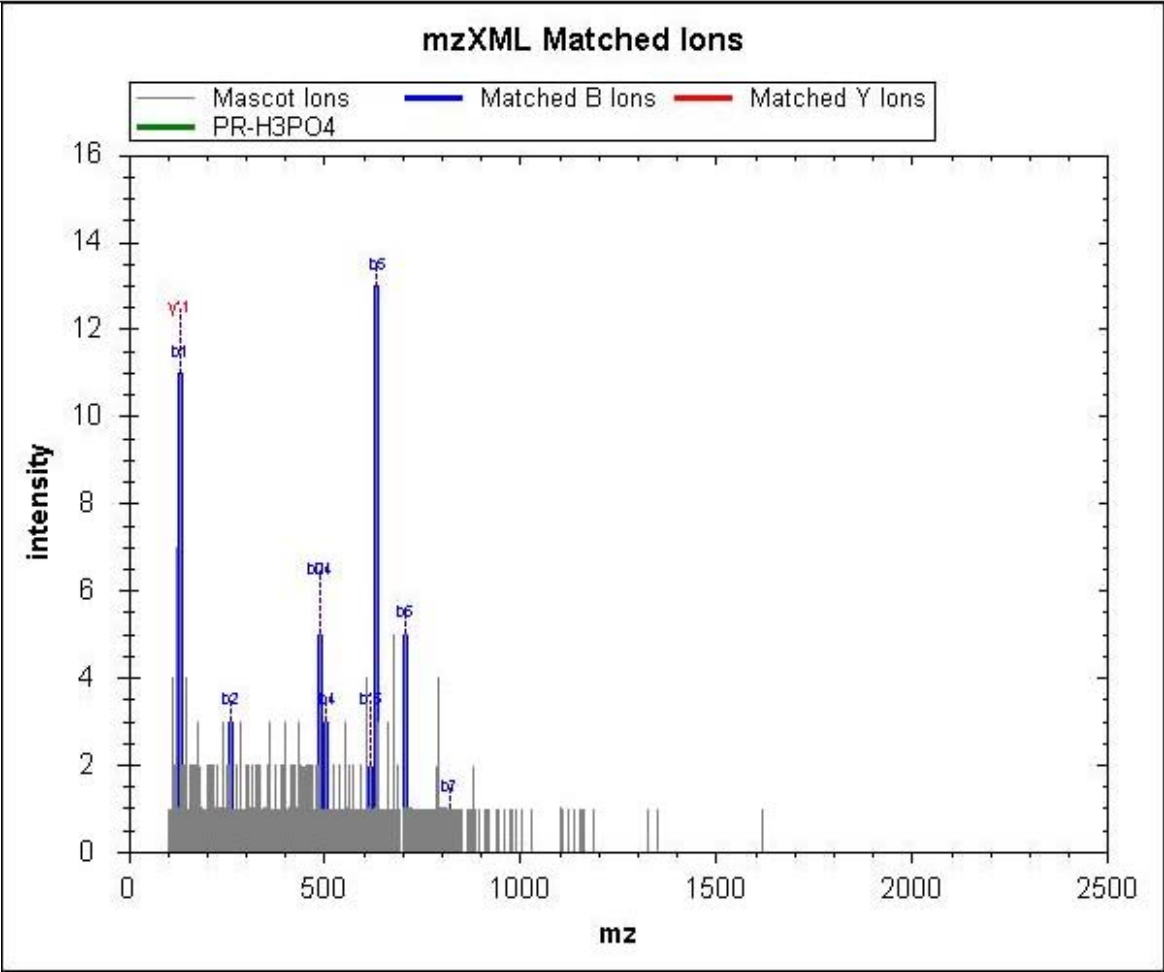

Protein index=437, ACC No:IPI00184330

Peptide index=4919 MS/MS spectrum

Sequence: GLALALFGGEPK, m/z:586.836, charge:+ 2, Modification: , Mod Position:

Score: 45.67, Raw data:WET\_B2\_090616\_03.mzxml, MS/MS Elution time: 66.91383, Scan number:3652, Mass delta:-0.0005, Rank:1

| No | b       | b++    | b0      | b0++   | Seq | y       | y++    | y*      | y*++   | y0      | y0++   | RevNo |
|----|---------|--------|---------|--------|-----|---------|--------|---------|--------|---------|--------|-------|
| 1  | 58.03   | 29.52  |         |        | G   |         |        |         |        |         |        | 12    |
| 2  | 171.11  | 86.06  |         |        | L   | 1115.65 | 558.33 | 1098.62 | 549.81 | 1097.64 | 549.32 | 11    |
| 3  | 242.15  | 121.58 |         |        | A   | 1002.56 | 501.78 | 985.54  | 493.27 | 984.55  | 492.78 | 10    |
| 4  | 355.23  | 178.12 |         |        | L   | 931.52  | 466.27 | 914.5   | 457.75 | 913.51  | 457.26 | 9     |
| 5  | 426.27  | 213.64 |         |        | A   | 818.44  | 409.72 | 801.41  | 401.21 | 800.43  | 400.72 | 8     |
| 6  | 539.36  | 270.18 |         |        | L   | 747.4   | 374.21 | 730.38  | 365.69 | 729.39  | 365.2  | 7     |
| 7  | 686.42  | 343.72 |         |        | F   | 634.32  | 317.66 | 617.29  | 309.15 | 616.31  | 308.66 | 6     |
| 8  | 743.45  | 372.23 |         |        | G   | 487.25  | 244.13 | 470.22  | 235.62 | 469.24  | 235.12 | 5     |
| 9  | 800.47  | 400.74 |         |        | G   | 430.23  | 215.62 | 413.2   | 207.11 | 412.22  | 206.61 | 4     |
| 10 | 929.51  | 465.26 | 911.5   | 456.25 | E   | 373.21  | 187.11 | 356.18  | 178.59 | 355.2   | 178.1  | 3     |
| 11 | 1026.56 | 513.78 | 1008.55 | 504.78 | P   | 244.17  | 122.59 | 227.14  | 114.07 |         |        | 2     |
| 12 |         |        |         |        | K   | 147.11  | 74.06  | 130.09  | 65.55  |         |        | 1     |



|    |        |        |         |        |         |       |   |        |        |        |        |  |   |
|----|--------|--------|---------|--------|---------|-------|---|--------|--------|--------|--------|--|---|
| 13 | 1373.8 | 687.41 | 1356.78 | 678.89 | 1355.79 | 678.4 | A | 246.16 | 123.58 | 229.13 | 115.07 |  | 2 |
| 14 |        |        |         |        |         |       | R | 175.12 | 88.06  | 158.09 | 79.55  |  | 1 |

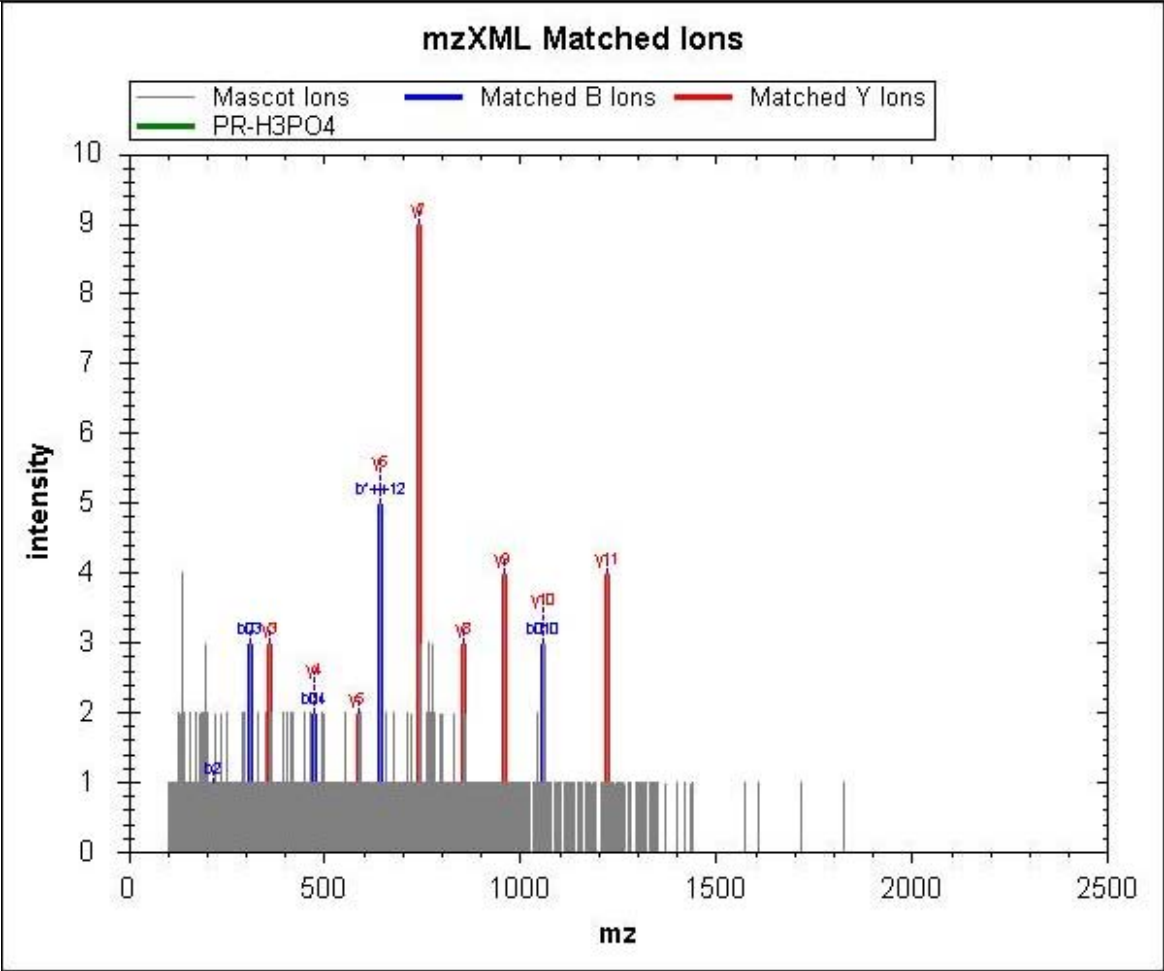

Protein index=440, ACC No:IPI00329236

Peptide index=4848 MS/MS spectrum

Sequence: AEFWLDLQPQAK, m/z:723.3775, charge:+ 2, Modification: , Mod Position:

Score: 50.64, Raw data:WET\_B2\_090616\_01.mzxml, MS/MS Elution time: 66.23, Scan number:3610, Mass delta:0.0027, Rank:1

| No | b       | b++    | b*      | b*++   | b0      | b0++   | Seq | y       | y++    | y*      | y*++   | y0      | y0++   | RevNo |
|----|---------|--------|---------|--------|---------|--------|-----|---------|--------|---------|--------|---------|--------|-------|
| 1  | 72.04   | 36.53  |         |        |         |        | A   |         |        |         |        |         |        | 12    |
| 2  | 201.09  | 101.05 |         |        | 183.08  | 92.04  | E   | 1374.71 | 687.86 | 1357.68 | 679.34 | 1356.69 | 678.85 | 11    |
| 3  | 348.16  | 174.58 |         |        | 330.14  | 165.58 | F   | 1245.66 | 623.33 | 1228.64 | 614.82 | 1227.65 | 614.33 | 10    |
| 4  | 534.23  | 267.62 |         |        | 516.22  | 258.62 | W   | 1098.59 | 549.8  | 1081.57 | 541.29 | 1080.58 | 540.8  | 9     |
| 5  | 647.32  | 324.16 |         |        | 629.31  | 315.16 | L   | 912.51  | 456.76 | 895.49  | 448.25 | 894.5   | 447.76 | 8     |
| 6  | 762.35  | 381.68 |         |        | 744.34  | 372.67 | D   | 799.43  | 400.22 | 782.4   | 391.71 | 781.42  | 391.21 | 7     |
| 7  | 875.43  | 438.22 |         |        | 857.42  | 429.21 | L   | 684.4   | 342.71 | 667.38  | 334.19 |         |        | 6     |
| 8  | 1003.49 | 502.25 | 986.46  | 493.73 | 985.48  | 493.24 | Q   | 571.32  | 286.16 | 554.29  | 277.65 |         |        | 5     |
| 9  | 1100.54 | 550.77 | 1083.51 | 542.26 | 1082.53 | 541.77 | P   | 443.26  | 222.13 | 426.23  | 213.62 |         |        | 4     |
| 10 | 1228.6  | 614.8  | 1211.57 | 606.29 | 1210.59 | 605.8  | Q   | 346.21  | 173.61 | 329.18  | 165.09 |         |        | 3     |

|    |         |        |         |        |         |        |   |        |        |        |        |  |  |   |
|----|---------|--------|---------|--------|---------|--------|---|--------|--------|--------|--------|--|--|---|
| 11 | 1299.64 | 650.32 | 1282.61 | 641.81 | 1281.63 | 641.32 | A | 218.15 | 109.58 | 201.12 | 101.07 |  |  | 2 |
| 12 |         |        |         |        |         |        | K | 147.11 | 74.06  | 130.09 | 65.55  |  |  | 1 |

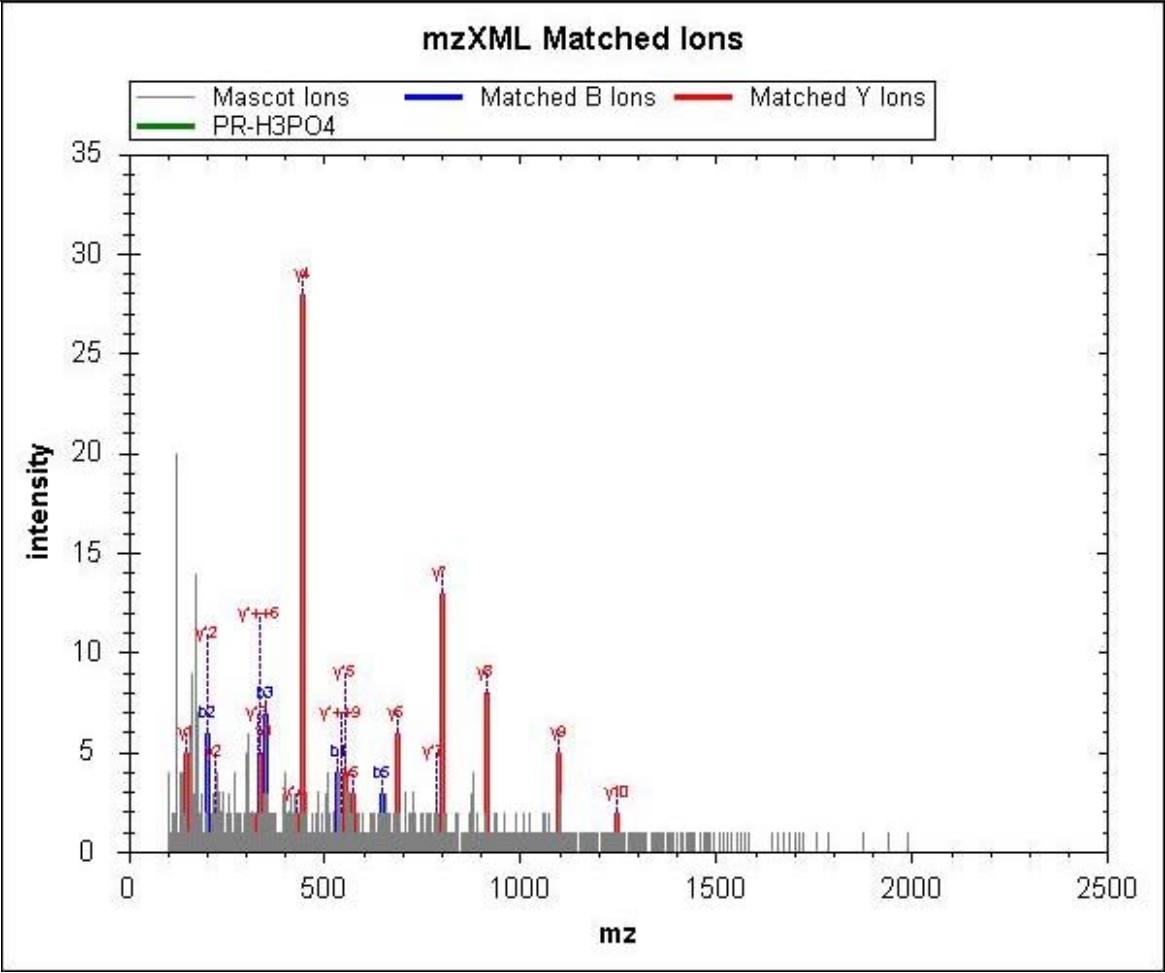

Protein index=446, ACC No: IPI00179713

Peptide index=6298 MS/MS spectrum

Sequence: ILVPTQFVGAIIGK, m/z:728.4503, charge:+ 2, Modification: , Mod Position:

Score: 68.42, Raw data:WET\_B3\_090616\_02.mzxml, MS/MS Elution time: 85.65883, Scan number:4775, Mass delta:-0.0031, Rank:1

| No | b      | b++    | b*      | b*++   | b0      | b0++   | Seq | y       | y++    | y*      | y*++   | y0      | y0++   | RevNo |
|----|--------|--------|---------|--------|---------|--------|-----|---------|--------|---------|--------|---------|--------|-------|
| 1  | 114.09 | 57.55  |         |        |         |        | I   |         |        |         |        |         |        | 14    |
| 2  | 227.18 | 114.09 |         |        |         |        | L   | 1342.81 | 671.91 | 1325.78 | 663.4  | 1324.8  | 662.9  | 13    |
| 3  | 326.24 | 163.63 |         |        |         |        | V   | 1229.73 | 615.37 | 1212.7  | 606.85 | 1211.71 | 606.36 | 12    |
| 4  | 423.3  | 212.15 |         |        |         |        | P   | 1130.66 | 565.83 | 1113.63 | 557.32 | 1112.65 | 556.83 | 11    |
| 5  | 524.34 | 262.68 |         |        | 506.33  | 253.67 | T   | 1033.6  | 517.31 | 1016.58 | 508.79 | 1015.59 | 508.3  | 10    |
| 6  | 652.4  | 326.71 | 635.38  | 318.19 | 634.39  | 317.7  | Q   | 932.56  | 466.78 | 915.53  | 458.27 |         |        | 9     |
| 7  | 799.47 | 400.24 | 782.44  | 391.73 | 781.46  | 391.23 | F   | 804.5   | 402.75 | 787.47  | 394.24 |         |        | 8     |
| 8  | 898.54 | 449.77 | 881.51  | 441.26 | 880.53  | 440.77 | V   | 657.43  | 329.22 | 640.4   | 320.71 |         |        | 7     |
| 9  | 955.56 | 478.28 | 938.53  | 469.77 | 937.55  | 469.28 | G   | 558.36  | 279.68 | 541.33  | 271.17 |         |        | 6     |
| 10 | 1026.6 | 513.8  | 1009.57 | 505.29 | 1008.59 | 504.8  | A   | 501.34  | 251.17 | 484.31  | 242.66 |         |        | 5     |

|    |         |        |         |        |         |        |   |        |        |        |        |  |  |   |
|----|---------|--------|---------|--------|---------|--------|---|--------|--------|--------|--------|--|--|---|
| 11 | 1139.68 | 570.34 | 1122.66 | 561.83 | 1121.67 | 561.34 | I | 430.3  | 215.65 | 413.28 | 207.14 |  |  | 4 |
| 12 | 1252.77 | 626.89 | 1235.74 | 618.37 | 1234.76 | 617.88 | I | 317.22 | 159.11 | 300.19 | 150.6  |  |  | 3 |
| 13 | 1309.79 | 655.4  | 1292.76 | 646.88 | 1291.78 | 646.39 | G | 204.13 | 102.57 | 187.11 | 94.06  |  |  | 2 |
| 14 |         |        |         |        |         |        | K | 147.11 | 74.06  | 130.09 | 65.55  |  |  | 1 |

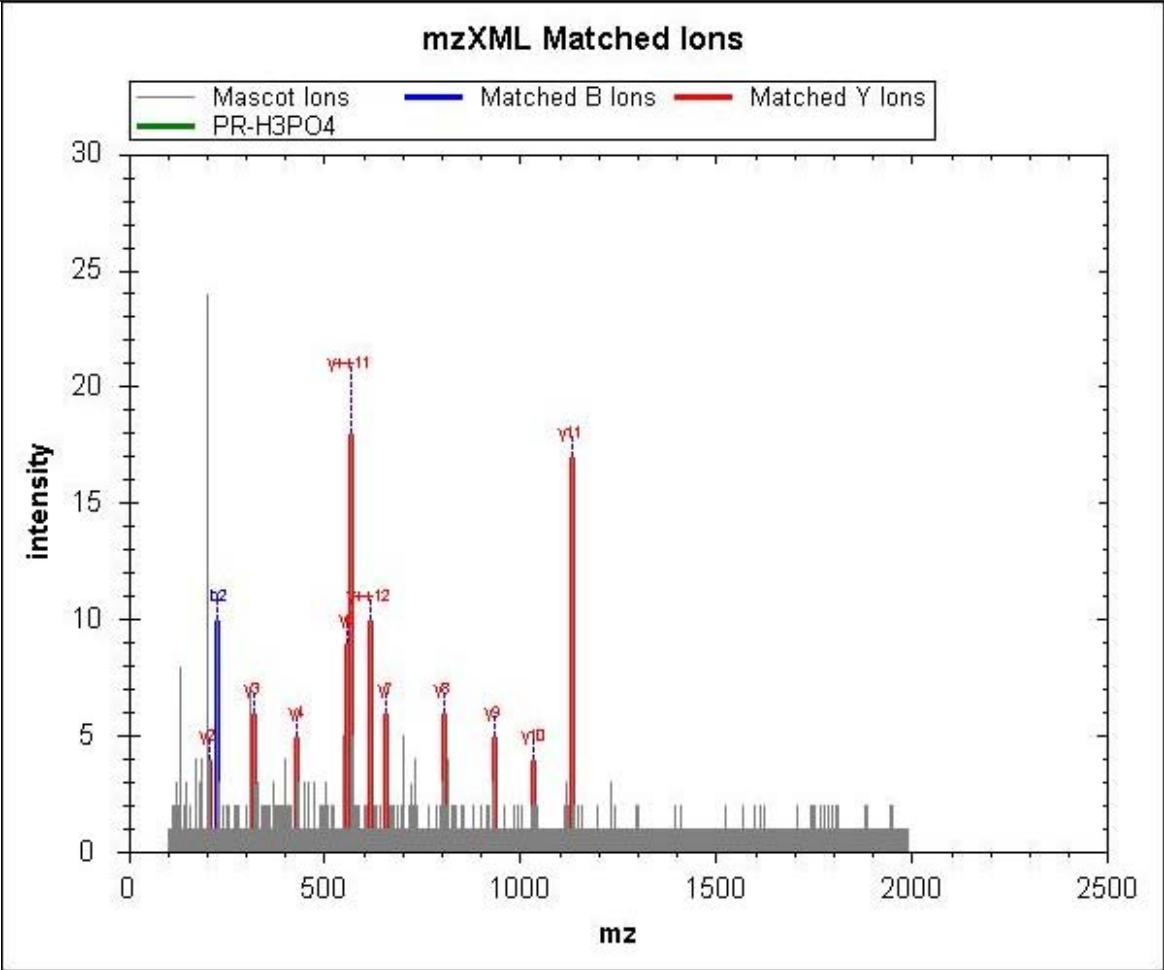

Protein index=453, ACC No:IPI00396627

Peptide index=6718 MS/MS spectrum

Sequence: IQTQLNLIHPDIFPLLTSFR, m/z:789.4472, charge:+ 3, Modification: , Mod Position:

Score: 66.33, Raw data:WET\_A2\_090616\_01.mzxml, MS/MS Elution time: 95.00566, Scan number:5290, Mass delta:0.0041, Rank:1

| No | b      | b++    | b*     | b*++   | b0     | b0++   | Seq | y       | y++     | y*      | y*++    | y0      | y0++    | RevNo |
|----|--------|--------|--------|--------|--------|--------|-----|---------|---------|---------|---------|---------|---------|-------|
| 1  | 114.09 | 57.55  |        |        |        |        | I   |         |         |         |         |         |         | 20    |
| 2  | 242.15 | 121.58 | 225.12 | 113.07 |        |        | Q   | 2253.24 | 1127.12 | 2236.21 | 1118.61 | 2235.23 | 1118.12 | 19    |
| 3  | 343.2  | 172.1  | 326.17 | 163.59 | 325.19 | 163.1  | T   | 2125.18 | 1063.09 | 2108.15 | 1054.58 | 2107.17 | 1054.09 | 18    |
| 4  | 471.26 | 236.13 | 454.23 | 227.62 | 453.25 | 227.13 | Q   | 2024.13 | 1012.57 | 2007.11 | 1004.06 | 2006.12 | 1003.56 | 17    |
| 5  | 584.34 | 292.67 | 567.31 | 284.16 | 566.33 | 283.67 | L   | 1896.07 | 948.54  | 1879.05 | 940.03  | 1878.06 | 939.54  | 16    |
| 6  | 698.38 | 349.7  | 681.36 | 341.18 | 680.37 | 340.69 | N   | 1782.99 | 892     | 1765.96 | 883.49  | 1764.98 | 882.99  | 15    |
| 7  | 811.47 | 406.24 | 794.44 | 397.72 | 793.46 | 397.23 | L   | 1668.95 | 834.98  | 1651.92 | 826.46  | 1650.94 | 825.97  | 14    |
| 8  | 924.55 | 462.78 | 907.52 | 454.27 | 906.54 | 453.77 | I   | 1555.86 | 778.44  | 1538.84 | 769.92  | 1537.85 | 769.43  | 13    |

|    |         |         |         |         |         |         |   |         |        |         |        |         |        |    |
|----|---------|---------|---------|---------|---------|---------|---|---------|--------|---------|--------|---------|--------|----|
| 9  | 1061.61 | 531.31  | 1044.58 | 522.8   | 1043.6  | 522.3   | H | 1442.78 | 721.89 | 1425.75 | 713.38 | 1424.77 | 712.89 | 12 |
| 10 | 1158.66 | 579.84  | 1141.64 | 571.32  | 1140.65 | 570.83  | P | 1305.72 | 653.36 | 1288.69 | 644.85 | 1287.71 | 644.36 | 11 |
| 11 | 1273.69 | 637.35  | 1256.66 | 628.84  | 1255.68 | 628.34  | D | 1208.67 | 604.84 | 1191.64 | 596.32 | 1190.66 | 595.83 | 10 |
| 12 | 1386.77 | 693.89  | 1369.75 | 685.38  | 1368.76 | 684.89  | I | 1093.64 | 547.32 | 1076.61 | 538.81 | 1075.63 | 538.32 | 9  |
| 13 | 1533.84 | 767.42  | 1516.82 | 758.91  | 1515.83 | 758.42  | F | 980.56  | 490.78 | 963.53  | 482.27 | 962.55  | 481.78 | 8  |
| 14 | 1630.9  | 815.95  | 1613.87 | 807.44  | 1612.88 | 806.95  | P | 833.49  | 417.25 | 816.46  | 408.73 | 815.48  | 408.24 | 7  |
| 15 | 1743.98 | 872.49  | 1726.95 | 863.98  | 1725.97 | 863.49  | L | 736.44  | 368.72 | 719.41  | 360.21 | 718.42  | 359.72 | 6  |
| 16 | 1857.06 | 929.04  | 1840.04 | 920.52  | 1839.05 | 920.03  | L | 623.35  | 312.18 | 606.32  | 303.67 | 605.34  | 303.17 | 5  |
| 17 | 1958.11 | 979.56  | 1941.08 | 971.05  | 1940.1  | 970.55  | T | 510.27  | 255.64 | 493.24  | 247.12 | 492.26  | 246.63 | 4  |
| 18 | 2045.14 | 1023.08 | 2028.12 | 1014.56 | 2027.13 | 1014.07 | S | 409.22  | 205.11 | 392.19  | 196.6  | 391.21  | 196.11 | 3  |
| 19 | 2192.21 | 1096.61 | 2175.19 | 1088.1  | 2174.2  | 1087.6  | F | 322.19  | 161.6  | 305.16  | 153.08 |         |        | 2  |
| 20 |         |         |         |         |         |         | R | 175.12  | 88.06  | 158.09  | 79.55  |         |        | 1  |

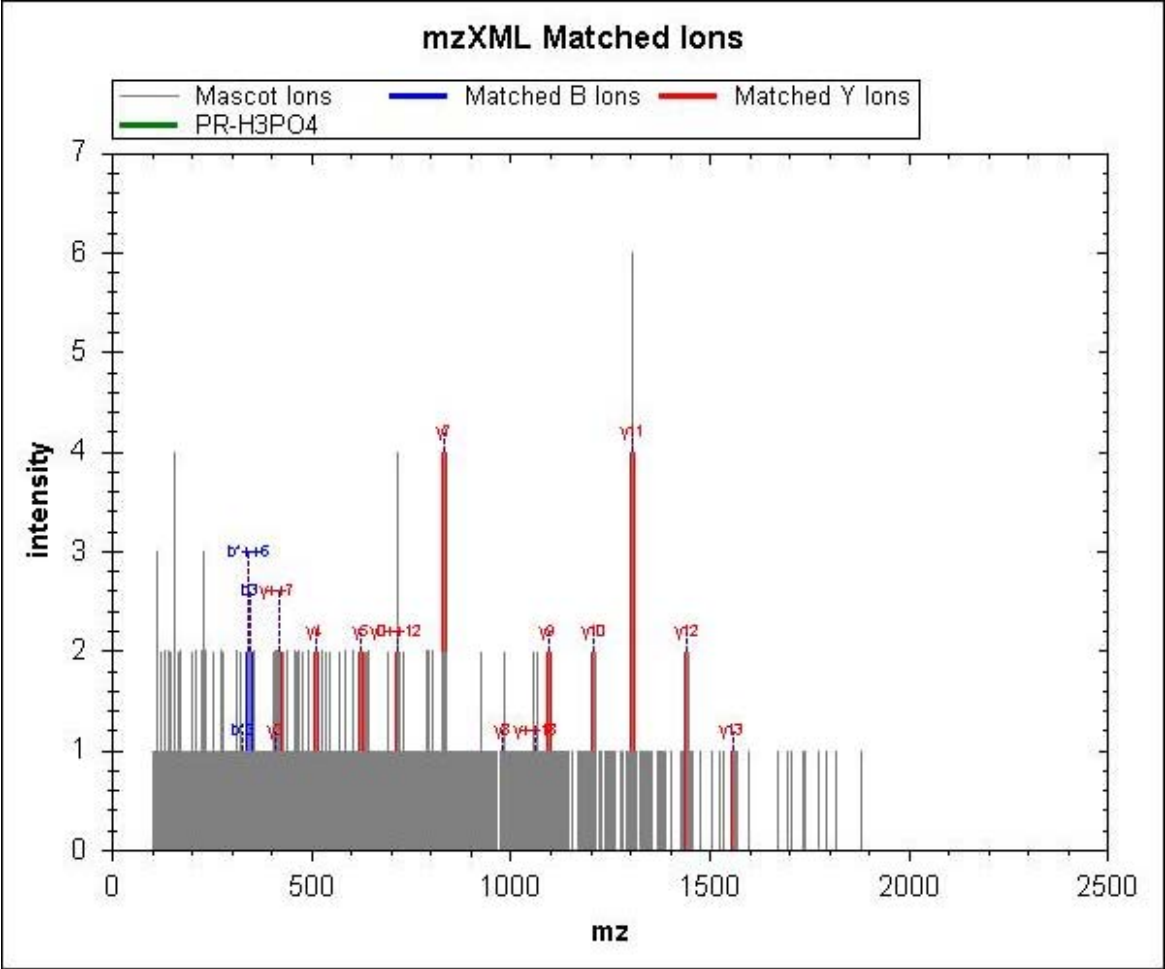

Protein index=459, ACC No:IPI00746388

Peptide index=6991 MS/MS spectrum

Sequence: FYPEDVAEELIQDITQK, m/z:1019.511, charge:+ 2, Modification: , Mod Position:

Score: 48.67, Raw data:WET\_A2\_090616\_01.mzxml, MS/MS Elution time: 103.224, Scan number:5789, Mass delta:0.0138, Rank:1

| No | b | b++ | b* | b*++ | b0 | b0++ | Seq | y | y++ | y* | y*++ | y0 | y0++ | RevNo |
|----|---|-----|----|------|----|------|-----|---|-----|----|------|----|------|-------|
|    |   |     |    |      |    |      |     |   |     |    |      |    |      |       |

|    |         |        |         |        |         |        |   |         |        |         |        |         |        |    |
|----|---------|--------|---------|--------|---------|--------|---|---------|--------|---------|--------|---------|--------|----|
| 1  | 148.08  | 74.54  |         |        |         |        | F |         |        |         |        |         |        | 17 |
| 2  | 311.14  | 156.07 |         |        |         |        | Y | 1890.93 | 945.97 | 1873.91 | 937.46 | 1872.92 | 936.96 | 16 |
| 3  | 408.19  | 204.6  |         |        |         |        | P | 1727.87 | 864.44 | 1710.84 | 855.93 | 1709.86 | 855.43 | 15 |
| 4  | 537.23  | 269.12 |         |        | 519.22  | 260.12 | E | 1630.82 | 815.91 | 1613.79 | 807.4  | 1612.81 | 806.91 | 14 |
| 5  | 652.26  | 326.63 |         |        | 634.25  | 317.63 | D | 1501.77 | 751.39 | 1484.75 | 742.88 | 1483.76 | 742.39 | 13 |
| 6  | 751.33  | 376.17 |         |        | 733.32  | 367.16 | V | 1386.75 | 693.88 | 1369.72 | 685.36 | 1368.74 | 684.87 | 12 |
| 7  | 822.37  | 411.69 |         |        | 804.36  | 402.68 | A | 1287.68 | 644.34 | 1270.65 | 635.83 | 1269.67 | 635.34 | 11 |
| 8  | 951.41  | 476.21 |         |        | 933.4   | 467.2  | E | 1216.64 | 608.82 | 1199.62 | 600.31 | 1198.63 | 599.82 | 10 |
| 9  | 1080.45 | 540.73 |         |        | 1062.44 | 531.72 | E | 1087.6  | 544.3  | 1070.57 | 535.79 | 1069.59 | 535.3  | 9  |
| 10 | 1193.54 | 597.27 |         |        | 1175.53 | 588.27 | L | 958.56  | 479.78 | 941.53  | 471.27 | 940.55  | 470.78 | 8  |
| 11 | 1306.62 | 653.81 |         |        | 1288.61 | 644.81 | I | 845.47  | 423.24 | 828.45  | 414.73 | 827.46  | 414.23 | 7  |
| 12 | 1434.68 | 717.84 | 1417.65 | 709.33 | 1416.67 | 708.84 | Q | 732.39  | 366.7  | 715.36  | 358.18 | 714.38  | 357.69 | 6  |
| 13 | 1549.71 | 775.36 | 1532.68 | 766.84 | 1531.7  | 766.35 | D | 604.33  | 302.67 | 587.3   | 294.16 | 586.32  | 293.66 | 5  |
| 14 | 1662.79 | 831.9  | 1645.76 | 823.39 | 1644.78 | 822.89 | I | 489.3   | 245.16 | 472.28  | 236.64 | 471.29  | 236.15 | 4  |
| 15 | 1763.84 | 882.42 | 1746.81 | 873.91 | 1745.83 | 873.42 | T | 376.22  | 188.61 | 359.19  | 180.1  | 358.21  | 179.61 | 3  |
| 16 | 1891.9  | 946.45 | 1874.87 | 937.94 | 1873.89 | 937.45 | Q | 275.17  | 138.09 | 258.14  | 129.58 |         |        | 2  |
| 17 |         |        |         |        |         |        | K | 147.11  | 74.06  | 130.09  | 65.55  |         |        | 1  |

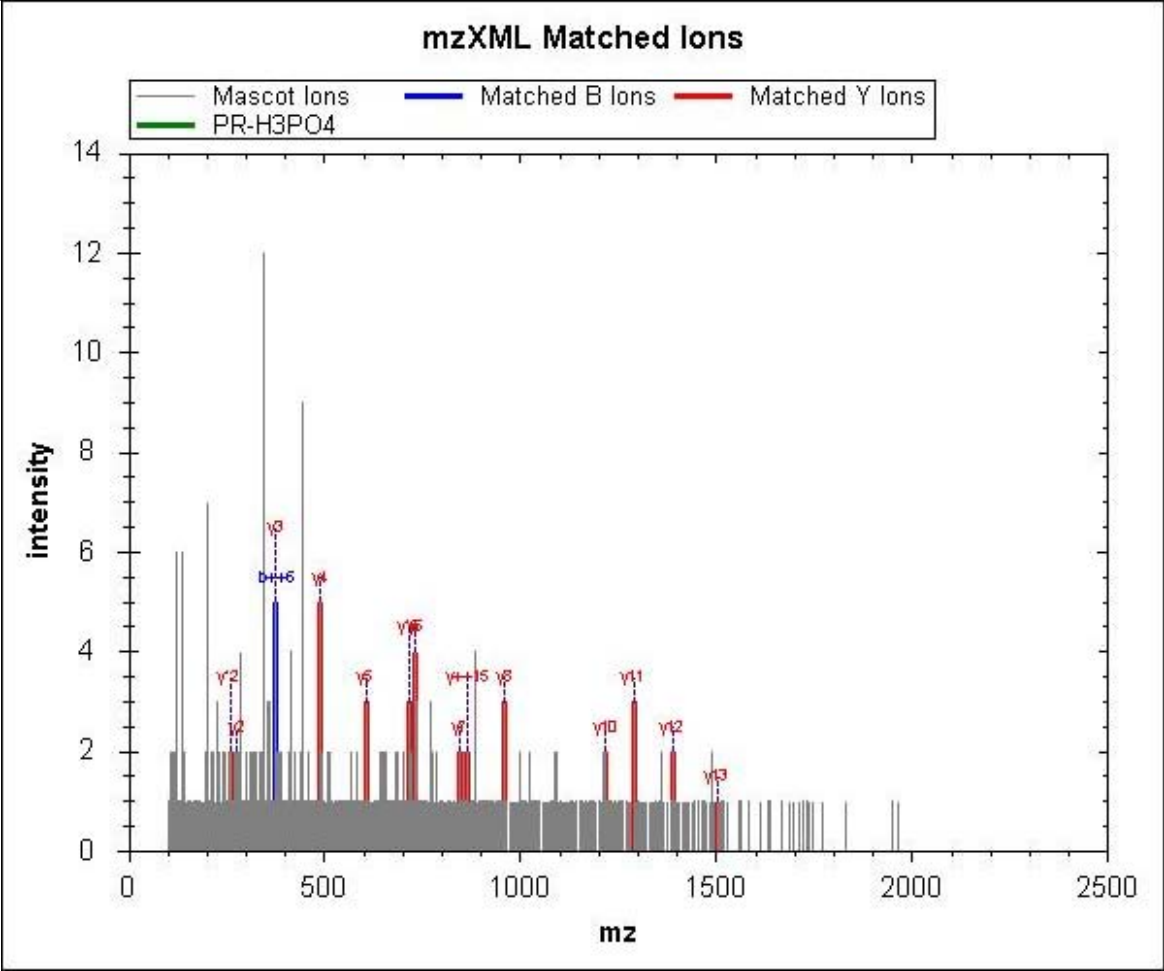

Protein index=462, ACC No:IPI00185146

Peptide index=7172 MS/MS spectrum

Sequence: IAAQDLLLAVATDFQNESAAALAAAATR, m/z:929.4972, charge:+ 3, Modification: , Mod Position:

Score: 80.33, Raw data:WET\_B2\_090616\_01.mzxml, MS/MS Elution time: 110.1023, Scan number:6202, Mass delta:0.0128, Rank:1

| No | b       | b++     | b*      | b*++    | b0      | b0++    | Seq | y       | y++     | y*      | y*++    | y0      | y0++    | RevNo |
|----|---------|---------|---------|---------|---------|---------|-----|---------|---------|---------|---------|---------|---------|-------|
| 1  | 114.09  | 57.55   |         |         |         |         | I   |         |         |         |         |         |         | 28    |
| 2  | 185.13  | 93.07   |         |         |         |         | A   | 2673.38 | 1337.2  | 2656.36 | 1328.68 | 2655.37 | 1328.19 | 27    |
| 3  | 256.17  | 128.59  |         |         |         |         | A   | 2602.35 | 1301.68 | 2585.32 | 1293.16 | 2584.34 | 1292.67 | 26    |
| 4  | 384.22  | 192.62  | 367.2   | 184.1   |         |         | Q   | 2531.31 | 1266.16 | 2514.28 | 1257.65 | 2513.3  | 1257.15 | 25    |
| 5  | 499.25  | 250.13  | 482.22  | 241.62  | 481.24  | 241.12  | D   | 2403.25 | 1202.13 | 2386.22 | 1193.62 | 2385.24 | 1193.12 | 24    |
| 6  | 612.34  | 306.67  | 595.31  | 298.16  | 594.32  | 297.67  | L   | 2288.22 | 1144.62 | 2271.2  | 1136.1  | 2270.21 | 1135.61 | 23    |
| 7  | 725.42  | 363.21  | 708.39  | 354.7   | 707.41  | 354.21  | L   | 2175.14 | 1088.07 | 2158.11 | 1079.56 | 2157.13 | 1079.07 | 22    |
| 8  | 838.5   | 419.76  | 821.48  | 411.24  | 820.49  | 410.75  | L   | 2062.06 | 1031.53 | 2045.03 | 1023.02 | 2044.05 | 1022.53 | 21    |
| 9  | 909.54  | 455.27  | 892.51  | 446.76  | 891.53  | 446.27  | A   | 1948.97 | 974.99  | 1931.95 | 966.48  | 1930.96 | 965.98  | 20    |
| 10 | 1008.61 | 504.81  | 991.58  | 496.29  | 990.6   | 495.8   | V   | 1877.94 | 939.47  | 1860.91 | 930.96  | 1859.92 | 930.47  | 19    |
| 11 | 1079.65 | 540.33  | 1062.62 | 531.81  | 1061.64 | 531.32  | A   | 1778.87 | 889.94  | 1761.84 | 881.42  | 1760.86 | 880.93  | 18    |
| 12 | 1180.69 | 590.85  | 1163.67 | 582.34  | 1162.68 | 581.85  | T   | 1707.83 | 854.42  | 1690.8  | 845.91  | 1689.82 | 845.41  | 17    |
| 13 | 1295.72 | 648.36  | 1278.69 | 639.85  | 1277.71 | 639.36  | D   | 1606.78 | 803.89  | 1589.76 | 795.38  | 1588.77 | 794.89  | 16    |
| 14 | 1442.79 | 721.9   | 1425.76 | 713.38  | 1424.78 | 712.89  | F   | 1491.76 | 746.38  | 1474.73 | 737.87  | 1473.74 | 737.38  | 15    |
| 15 | 1570.85 | 785.93  | 1553.82 | 777.41  | 1552.84 | 776.92  | Q   | 1344.69 | 672.85  | 1327.66 | 664.33  | 1326.68 | 663.84  | 14    |
| 16 | 1684.89 | 842.95  | 1667.86 | 834.44  | 1666.88 | 833.94  | N   | 1216.63 | 608.82  | 1199.6  | 600.3   | 1198.62 | 599.81  | 13    |
| 17 | 1813.93 | 907.47  | 1796.91 | 898.96  | 1795.92 | 898.46  | E   | 1102.59 | 551.8   | 1085.56 | 543.28  | 1084.57 | 542.79  | 12    |
| 18 | 1900.97 | 950.99  | 1883.94 | 942.47  | 1882.95 | 941.98  | S   | 973.54  | 487.27  | 956.52  | 478.76  | 955.53  | 478.27  | 11    |
| 19 | 1972    | 986.5   | 1954.98 | 977.99  | 1953.99 | 977.5   | A   | 886.51  | 443.76  | 869.48  | 435.25  | 868.5   | 434.75  | 10    |
| 20 | 2043.04 | 1022.02 | 2026.01 | 1013.51 | 2025.03 | 1013.02 | A   | 815.47  | 408.24  | 798.45  | 399.73  | 797.46  | 399.24  | 9     |
| 21 | 2114.08 | 1057.54 | 2097.05 | 1049.03 | 2096.07 | 1048.54 | A   | 744.44  | 372.72  | 727.41  | 364.21  | 726.43  | 363.72  | 8     |
| 22 | 2227.16 | 1114.08 | 2210.13 | 1105.57 | 2209.15 | 1105.08 | L   | 673.4   | 337.2   | 656.37  | 328.69  | 655.39  | 328.2   | 7     |
| 23 | 2298.2  | 1149.6  | 2281.17 | 1141.09 | 2280.19 | 1140.6  | A   | 560.32  | 280.66  | 543.29  | 272.15  | 542.3   | 271.66  | 6     |
| 24 | 2369.23 | 1185.12 | 2352.21 | 1176.61 | 2351.22 | 1176.12 | A   | 489.28  | 245.14  | 472.25  | 236.63  | 471.27  | 236.14  | 5     |
| 25 | 2440.27 | 1220.64 | 2423.25 | 1212.13 | 2422.26 | 1211.63 | A   | 418.24  | 209.62  | 401.21  | 201.11  | 400.23  | 200.62  | 4     |
| 26 | 2511.31 | 1256.16 | 2494.28 | 1247.64 | 2493.3  | 1247.15 | A   | 347.2   | 174.11  | 330.18  | 165.59  | 329.19  | 165.1   | 3     |
| 27 | 2612.36 | 1306.68 | 2595.33 | 1298.17 | 2594.35 | 1297.68 | T   | 276.17  | 138.59  | 259.14  | 130.07  | 258.16  | 129.58  | 2     |
| 28 |         |         |         |         |         |         | R   | 175.12  | 88.06   | 158.09  | 79.55   |         |         | 1     |

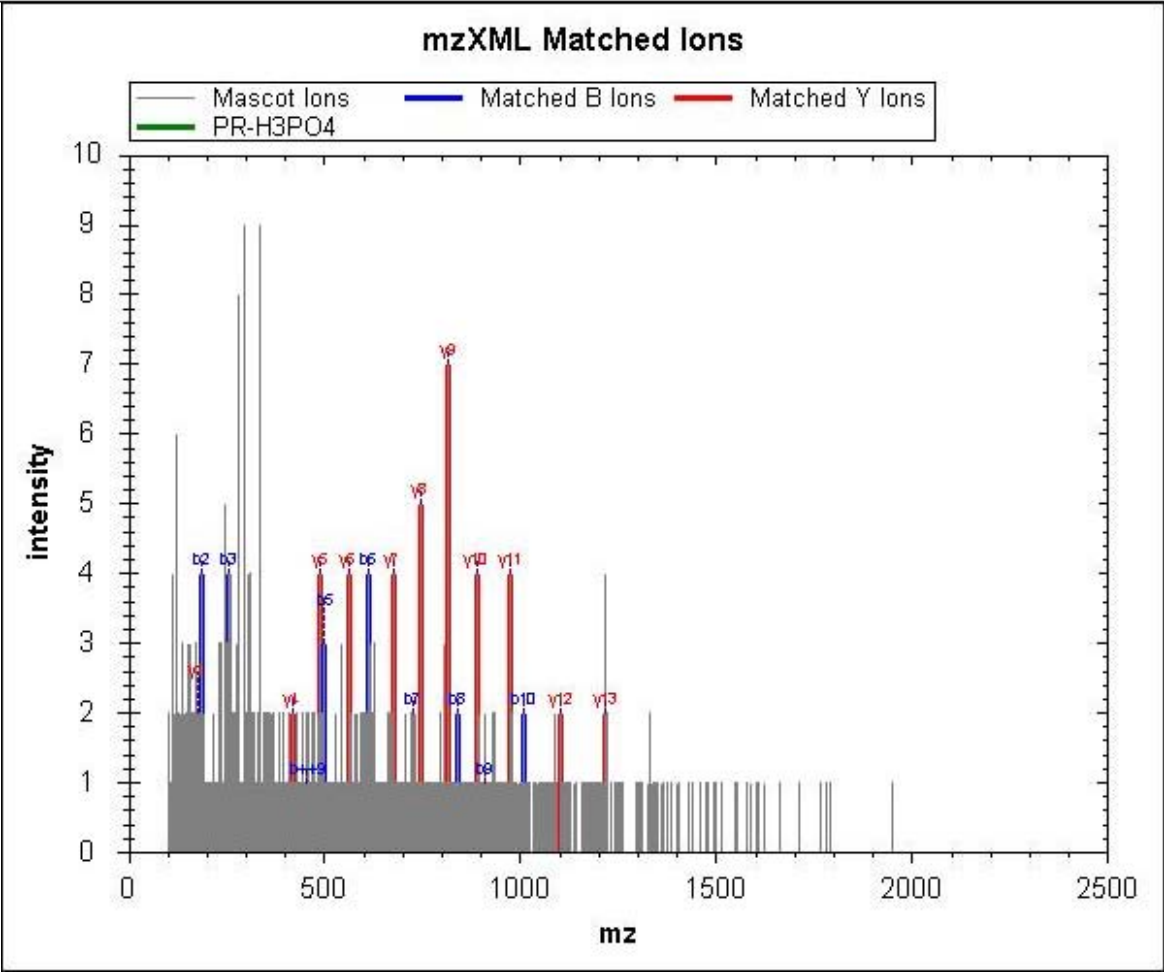

Protein index=463, ACC No:IPI00298971

Peptide index=5831 MS/MS spectrum

Sequence: DVWGIEGPIDAAFTR, m/z:823.9159, charge:+ 2, Modification: , Mod Position:

Score: 56.26, Raw data:WET\_A2\_090616\_01.mzxml, MS/MS Elution time: 78.96783, Scan number:4359, Mass delta:0.0072, Rank:1

| No | b       | b++    | b0      | b0++   | Seq | y       | y++    | y*      | y*++   | y0      | y0++   | RevNo |
|----|---------|--------|---------|--------|-----|---------|--------|---------|--------|---------|--------|-------|
| 1  | 116.03  | 58.52  | 98.02   | 49.52  | D   |         |        |         |        |         |        | 15    |
| 2  | 215.1   | 108.05 | 197.09  | 99.05  | V   | 1531.79 | 766.4  | 1514.76 | 757.89 | 1513.78 | 757.39 | 14    |
| 3  | 401.18  | 201.09 | 383.17  | 192.09 | W   | 1432.72 | 716.86 | 1415.7  | 708.35 | 1414.71 | 707.86 | 13    |
| 4  | 458.2   | 229.61 | 440.19  | 220.6  | G   | 1246.64 | 623.83 | 1229.62 | 615.31 | 1228.63 | 614.82 | 12    |
| 5  | 571.29  | 286.15 | 553.28  | 277.14 | I   | 1189.62 | 595.31 | 1172.59 | 586.8  | 1171.61 | 586.31 | 11    |
| 6  | 700.33  | 350.67 | 682.32  | 341.66 | E   | 1076.54 | 538.77 | 1059.51 | 530.26 | 1058.53 | 529.77 | 10    |
| 7  | 757.35  | 379.18 | 739.34  | 370.17 | G   | 947.49  | 474.25 | 930.47  | 465.74 | 929.48  | 465.25 | 9     |
| 8  | 854.4   | 427.71 | 836.39  | 418.7  | P   | 890.47  | 445.74 | 873.45  | 437.23 | 872.46  | 436.73 | 8     |
| 9  | 967.49  | 484.25 | 949.48  | 475.24 | I   | 793.42  | 397.21 | 776.39  | 388.7  | 775.41  | 388.21 | 7     |
| 10 | 1082.52 | 541.76 | 1064.5  | 532.76 | D   | 680.34  | 340.67 | 663.31  | 332.16 | 662.33  | 331.67 | 6     |
| 11 | 1153.55 | 577.28 | 1135.54 | 568.27 | A   | 565.31  | 283.16 | 548.28  | 274.64 | 547.3   | 274.15 | 5     |
| 12 | 1224.59 | 612.8  | 1206.58 | 603.79 | A   | 494.27  | 247.64 | 477.25  | 239.13 | 476.26  | 238.63 | 4     |

|    |         |        |         |        |   |        |        |        |        |        |        |   |
|----|---------|--------|---------|--------|---|--------|--------|--------|--------|--------|--------|---|
| 13 | 1371.66 | 686.33 | 1353.65 | 677.33 | F | 423.24 | 212.12 | 406.21 | 203.61 | 405.22 | 203.12 | 3 |
| 14 | 1472.71 | 736.86 | 1454.7  | 727.85 | T | 276.17 | 138.59 | 259.14 | 130.07 | 258.16 | 129.58 | 2 |
| 15 |         |        |         |        | R | 175.12 | 88.06  | 158.09 | 79.55  |        |        | 1 |

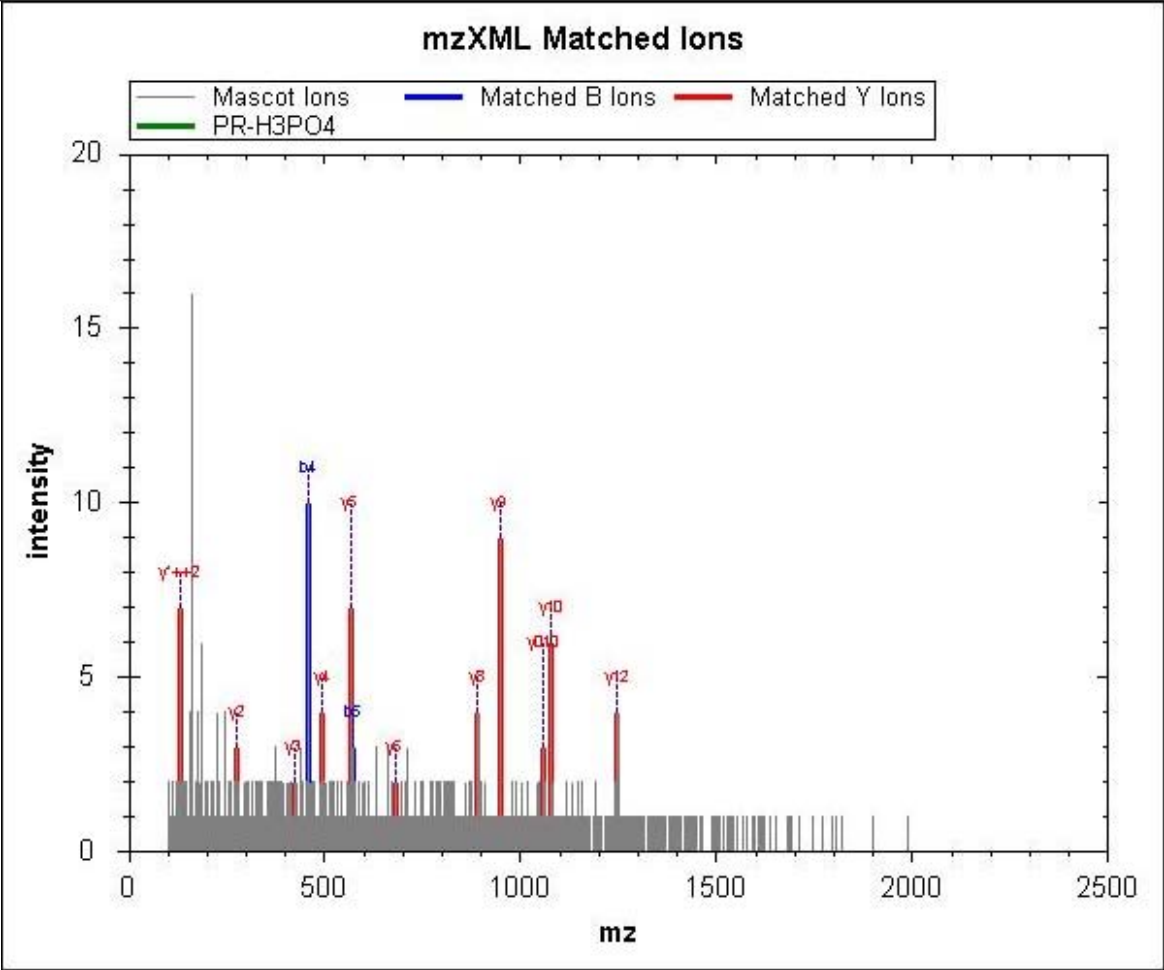

Protein index=467, ACC No:IPI00298738

Peptide index=6698 MS/MS spectrum

Sequence: VL~~D~~LV~~L~~QLFQAK, m/z:693.9226, charge:+ 2, Modification: , Mod Position:

Score: 60.88, Raw data:WET\_A2\_090616\_03.mzxml, MS/MS Elution time: 94.35983, Scan number:5246, Mass delta:-0.0857, Rank:1

| No | b       | b++    | b*      | b*++   | b0      | b0++   | Seq | y       | y++    | y*      | y*++   | y0      | y0++   | RevNo |
|----|---------|--------|---------|--------|---------|--------|-----|---------|--------|---------|--------|---------|--------|-------|
| 1  | 100.08  | 50.54  |         |        |         |        | V   |         |        |         |        |         |        | 12    |
| 2  | 213.16  | 107.08 |         |        |         |        | L   | 1287.77 | 644.39 | 1270.74 | 635.87 | 1269.76 | 635.38 | 11    |
| 3  | 328.19  | 164.6  |         |        | 310.18  | 155.59 | D   | 1174.68 | 587.85 | 1157.66 | 579.33 | 1156.67 | 578.84 | 10    |
| 4  | 441.27  | 221.14 |         |        | 423.26  | 212.13 | L   | 1059.66 | 530.33 | 1042.63 | 521.82 |         |        | 9     |
| 5  | 540.34  | 270.67 |         |        | 522.33  | 261.67 | V   | 946.57  | 473.79 | 929.55  | 465.28 |         |        | 8     |
| 6  | 653.42  | 327.22 |         |        | 635.41  | 318.21 | L   | 847.5   | 424.26 | 830.48  | 415.74 |         |        | 7     |
| 7  | 781.48  | 391.24 | 764.46  | 382.73 | 763.47  | 382.24 | Q   | 734.42  | 367.71 | 717.39  | 359.2  |         |        | 6     |
| 8  | 894.57  | 447.79 | 877.54  | 439.27 | 876.56  | 438.78 | L   | 606.36  | 303.68 | 589.33  | 295.17 |         |        | 5     |
| 9  | 1041.63 | 521.32 | 1024.61 | 512.81 | 1023.62 | 512.32 | F   | 493.28  | 247.14 | 476.25  | 238.63 |         |        | 4     |

|    |         |        |         |        |         |        |   |        |        |        |        |  |  |   |
|----|---------|--------|---------|--------|---------|--------|---|--------|--------|--------|--------|--|--|---|
| 10 | 1169.69 | 585.35 | 1152.67 | 576.84 | 1151.68 | 576.34 | Q | 346.21 | 173.61 | 329.18 | 165.09 |  |  | 3 |
| 11 | 1240.73 | 620.87 | 1223.7  | 612.36 | 1222.72 | 611.86 | A | 218.15 | 109.58 | 201.12 | 101.07 |  |  | 2 |
| 12 |         |        |         |        |         |        | K | 147.11 | 74.06  | 130.09 | 65.55  |  |  | 1 |

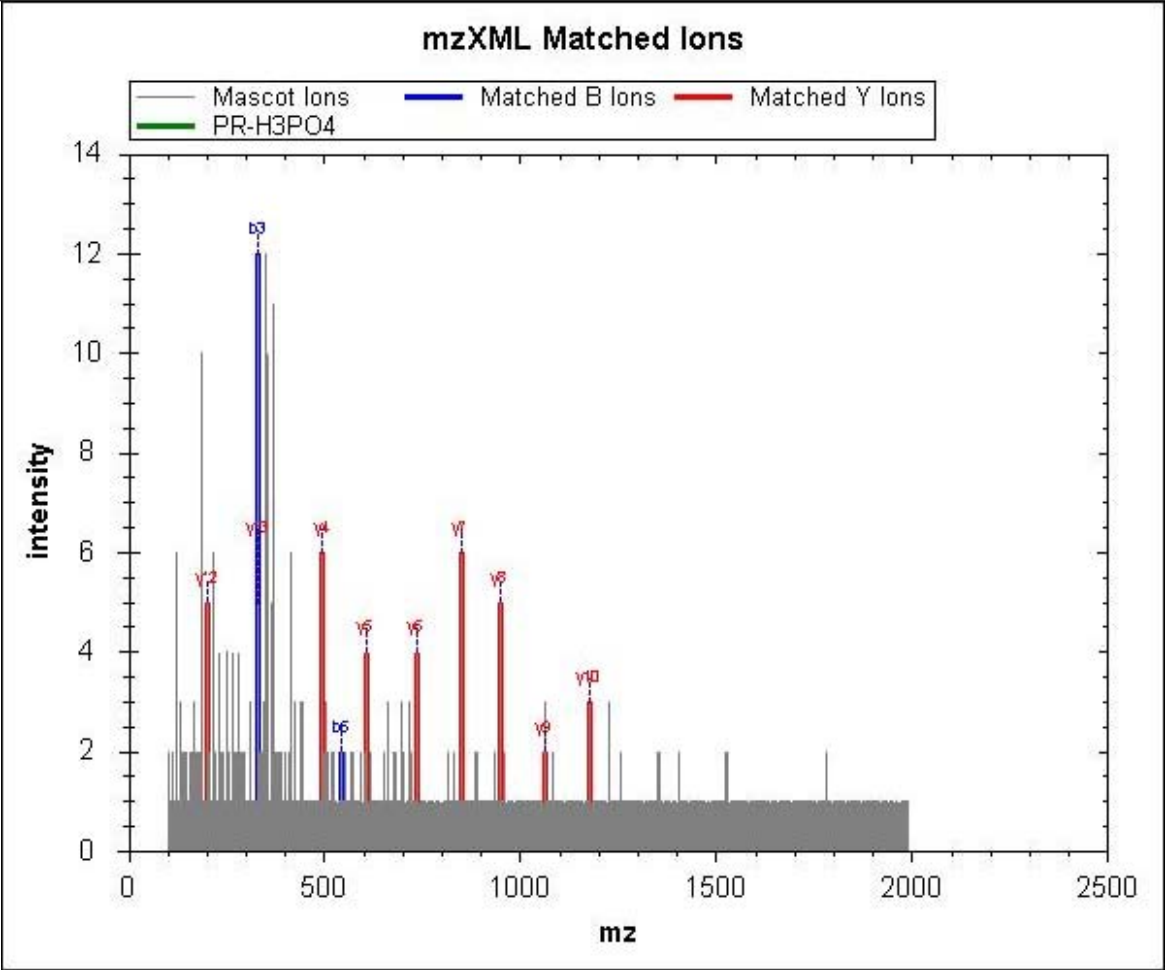

Protein index=473, ACC No:IPI00016621

Peptide index=6170 MS/MS spectrum

Sequence: VGGYILGEFGNLIAGDPR, m/z:924.489, charge:+ 2, Modification: , Mod Position:

Score: 60.42, Raw data:WET\_B2\_090616\_01.mzxml, MS/MS Elution time: 83.37067, Scan number:4606, Mass delta:0.0021, Rank:1

| No | b      | b++    | b* | b*++ | b0     | b0++   | Seq | y       | y++    | y*      | y*++   | y0      | y0++   | RevNo |
|----|--------|--------|----|------|--------|--------|-----|---------|--------|---------|--------|---------|--------|-------|
| 1  | 100.08 | 50.54  |    |      |        |        | V   |         |        |         |        |         |        | 18    |
| 2  | 157.1  | 79.05  |    |      |        |        | G   | 1748.9  | 874.95 | 1731.87 | 866.44 | 1730.89 | 865.95 | 17    |
| 3  | 214.12 | 107.56 |    |      |        |        | G   | 1691.88 | 846.44 | 1674.85 | 837.93 | 1673.86 | 837.44 | 16    |
| 4  | 377.18 | 189.09 |    |      |        |        | Y   | 1634.85 | 817.93 | 1617.83 | 809.42 | 1616.84 | 808.93 | 15    |
| 5  | 490.27 | 245.64 |    |      |        |        | I   | 1471.79 | 736.4  | 1454.76 | 727.89 | 1453.78 | 727.39 | 14    |
| 6  | 603.35 | 302.18 |    |      |        |        | L   | 1358.71 | 679.86 | 1341.68 | 671.34 | 1340.7  | 670.85 | 13    |
| 7  | 660.37 | 330.69 |    |      |        |        | G   | 1245.62 | 623.31 | 1228.6  | 614.8  | 1227.61 | 614.31 | 12    |
| 8  | 789.41 | 395.21 |    |      | 771.4  | 386.21 | E   | 1188.6  | 594.8  | 1171.57 | 586.29 | 1170.59 | 585.8  | 11    |
| 9  | 936.48 | 468.74 |    |      | 918.47 | 459.74 | F   | 1059.56 | 530.28 | 1042.53 | 521.77 | 1041.55 | 521.28 | 10    |

|    |         |        |         |        |         |        |   |        |        |        |        |        |        |   |
|----|---------|--------|---------|--------|---------|--------|---|--------|--------|--------|--------|--------|--------|---|
| 10 | 993.5   | 497.26 |         |        | 975.49  | 488.25 | G | 912.49 | 456.75 | 895.46 | 448.24 | 894.48 | 447.74 | 9 |
| 11 | 1107.55 | 554.28 | 1090.52 | 545.76 | 1089.54 | 545.27 | N | 855.47 | 428.24 | 838.44 | 419.72 | 837.46 | 419.23 | 8 |
| 12 | 1220.63 | 610.82 | 1203.6  | 602.31 | 1202.62 | 601.81 | L | 741.43 | 371.22 | 724.4  | 362.7  | 723.41 | 362.21 | 7 |
| 13 | 1333.72 | 667.36 | 1316.69 | 658.85 | 1315.7  | 658.36 | I | 628.34 | 314.67 | 611.31 | 306.16 | 610.33 | 305.67 | 6 |
| 14 | 1404.75 | 702.88 | 1387.73 | 694.37 | 1386.74 | 693.87 | A | 515.26 | 258.13 | 498.23 | 249.62 | 497.25 | 249.13 | 5 |
| 15 | 1461.77 | 731.39 | 1444.75 | 722.88 | 1443.76 | 722.39 | G | 444.22 | 222.61 | 427.19 | 214.1  | 426.21 | 213.61 | 4 |
| 16 | 1576.8  | 788.9  | 1559.77 | 780.39 | 1558.79 | 779.9  | D | 387.2  | 194.1  | 370.17 | 185.59 | 369.19 | 185.1  | 3 |
| 17 | 1673.85 | 837.43 | 1656.83 | 828.92 | 1655.84 | 828.43 | P | 272.17 | 136.59 | 255.15 | 128.08 |        |        | 2 |
| 18 |         |        |         |        |         |        | R | 175.12 | 88.06  | 158.09 | 79.55  |        |        | 1 |

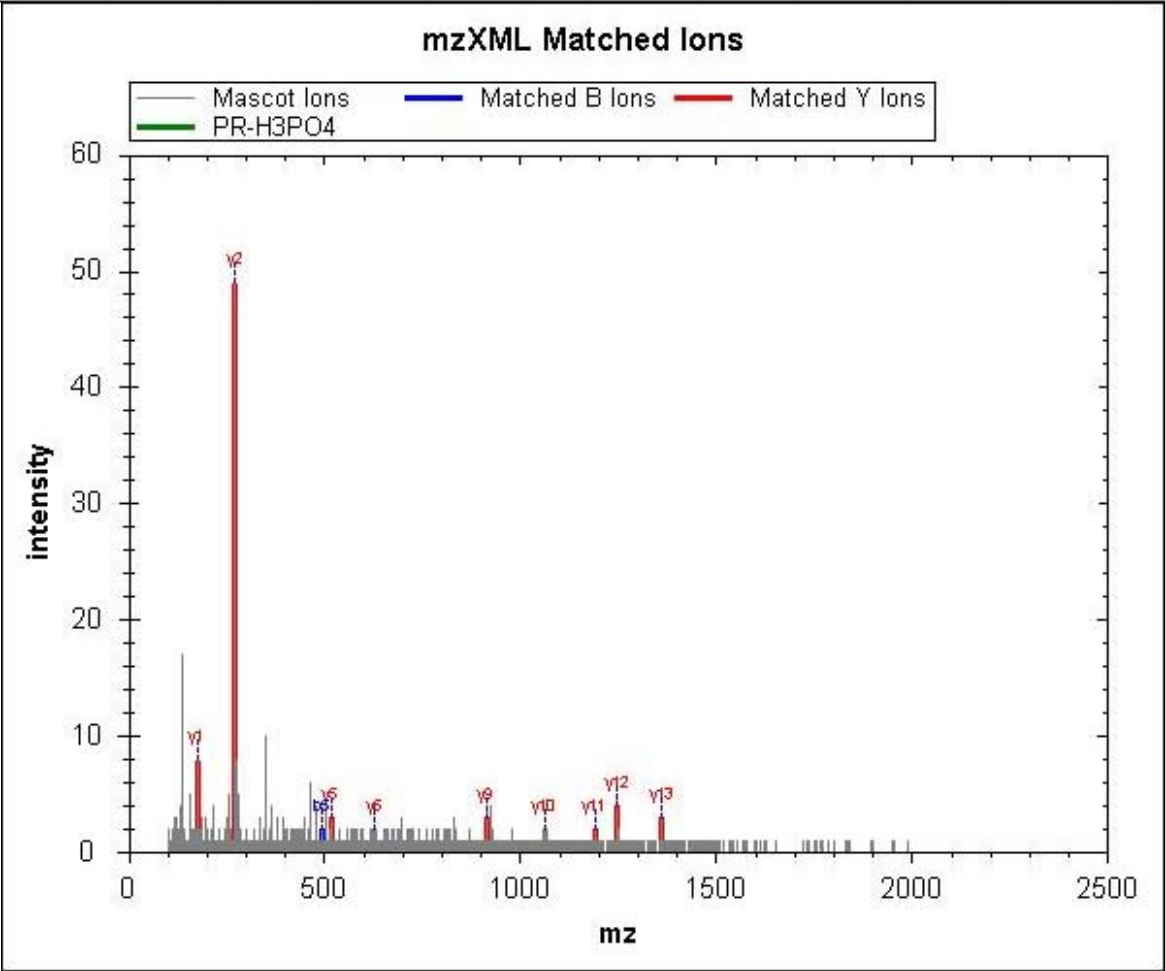

Protein index=476, ACC No:IPI00306369

Peptide index=5001 MS/MS spectrum

Sequence: ILLTQENPFFR, m/z:689.3818, charge:+ 2, Modification: , Mod Position:

Score: 89.6, Raw data:WET\_A2\_090616\_01.mzxml, MS/MS Elution time: 68.0405, Scan number:3724, Mass delta:0.0037, Rank:1

| No | b      | b++    | b* | b*++ | b0 | b0++ | Seq | y       | y++    | y*      | y*++   | y0      | y0++   | RevNo |
|----|--------|--------|----|------|----|------|-----|---------|--------|---------|--------|---------|--------|-------|
| 1  | 114.09 | 57.55  |    |      |    |      | I   |         |        |         |        |         |        | 11    |
| 2  | 227.18 | 114.09 |    |      |    |      | L   | 1264.67 | 632.84 | 1247.64 | 624.32 | 1246.66 | 623.83 | 10    |
| 3  | 340.26 | 170.63 |    |      |    |      | L   | 1151.58 | 576.3  | 1134.56 | 567.78 | 1133.57 | 567.29 | 9     |

|    |         |        |         |        |         |        |   |        |        |         |        |         |        |   |
|----|---------|--------|---------|--------|---------|--------|---|--------|--------|---------|--------|---------|--------|---|
| 4  | 441.31  | 221.16 |         |        | 423.3   | 212.15 | T | 1038.5 | 519.75 | 1021.47 | 511.24 | 1020.49 | 510.75 | 8 |
| 5  | 569.37  | 285.19 | 552.34  | 276.67 | 551.36  | 276.18 | Q | 937.45 | 469.23 | 920.43  | 460.72 | 919.44  | 460.22 | 7 |
| 6  | 698.41  | 349.71 | 681.38  | 341.19 | 680.4   | 340.7  | E | 809.39 | 405.2  | 792.37  | 396.69 | 791.38  | 396.2  | 6 |
| 7  | 812.45  | 406.73 | 795.42  | 398.22 | 794.44  | 397.72 | N | 680.35 | 340.68 | 663.32  | 332.17 |         |        | 5 |
| 8  | 909.5   | 455.26 | 892.48  | 446.74 | 891.49  | 446.25 | P | 566.31 | 283.66 | 549.28  | 275.14 |         |        | 4 |
| 9  | 1056.57 | 528.79 | 1039.55 | 520.28 | 1038.56 | 519.78 | F | 469.26 | 235.13 | 452.23  | 226.62 |         |        | 3 |
| 10 | 1203.64 | 602.32 | 1186.61 | 593.81 | 1185.63 | 593.32 | F | 322.19 | 161.6  | 305.16  | 153.08 |         |        | 2 |
| 11 |         |        |         |        |         |        | R | 175.12 | 88.06  | 158.09  | 79.55  |         |        | 1 |

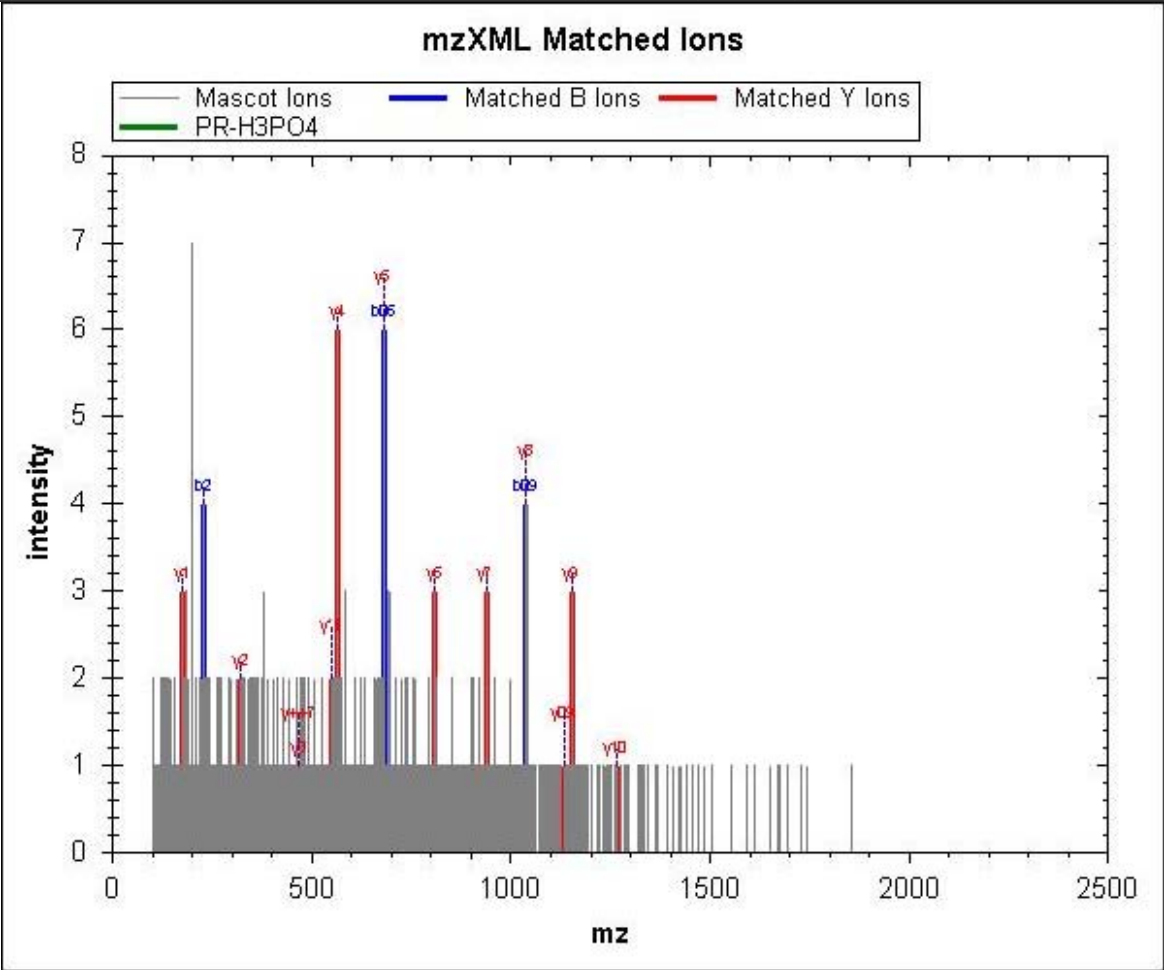

Protein index=478, ACC No:IPI00174390

Peptide index=7089 MS/MS spectrum

Sequence: AVFSDSLVPALEAFGLEGVFR, m/z:1112.581, charge:+ 2, Modification: , Mod Position:

Score: 37.7, Raw data:WET\_A2\_090616\_01.mzxml, MS/MS Elution time: 106.2263, Scan number:5974, Mass delta:-0.0103, Rank:1

| No | b      | b++    | b0    | b0++  | Seq | y       | y++     | y*      | y*++    | y0      | y0++    | RevNo |
|----|--------|--------|-------|-------|-----|---------|---------|---------|---------|---------|---------|-------|
| 1  | 72.04  | 36.53  |       |       | A   |         |         |         |         |         |         | 21    |
| 2  | 171.11 | 86.06  |       |       | V   | 2153.13 | 1077.07 | 2136.1  | 1068.55 | 2135.12 | 1068.06 | 20    |
| 3  | 318.18 | 159.59 |       |       | F   | 2054.06 | 1027.53 | 2037.03 | 1019.02 | 2036.05 | 1018.53 | 19    |
| 4  | 405.21 | 203.11 | 387.2 | 194.1 | S   | 1906.99 | 954     | 1889.96 | 945.49  | 1888.98 | 944.99  | 18    |

|    |         |         |         |         |   |         |        |         |        |         |        |    |
|----|---------|---------|---------|---------|---|---------|--------|---------|--------|---------|--------|----|
| 5  | 520.24  | 260.62  | 502.23  | 251.62  | D | 1819.96 | 910.48 | 1802.93 | 901.97 | 1801.95 | 901.48 | 17 |
| 6  | 607.27  | 304.14  | 589.26  | 295.13  | S | 1704.93 | 852.97 | 1687.91 | 844.46 | 1686.92 | 843.96 | 16 |
| 7  | 720.36  | 360.68  | 702.35  | 351.68  | L | 1617.9  | 809.45 | 1600.87 | 800.94 | 1599.89 | 800.45 | 15 |
| 8  | 819.42  | 410.22  | 801.41  | 401.21  | V | 1504.82 | 752.91 | 1487.79 | 744.4  | 1486.81 | 743.91 | 14 |
| 9  | 916.48  | 458.74  | 898.47  | 449.74  | P | 1405.75 | 703.38 | 1388.72 | 694.86 | 1387.74 | 694.37 | 13 |
| 10 | 987.51  | 494.26  | 969.5   | 485.26  | A | 1308.69 | 654.85 | 1291.67 | 646.34 | 1290.68 | 645.85 | 12 |
| 11 | 1100.6  | 550.8   | 1082.59 | 541.8   | L | 1237.66 | 619.33 | 1220.63 | 610.82 | 1219.65 | 610.33 | 11 |
| 12 | 1229.64 | 615.32  | 1211.63 | 606.32  | E | 1124.57 | 562.79 | 1107.55 | 554.28 | 1106.56 | 553.79 | 10 |
| 13 | 1300.68 | 650.84  | 1282.67 | 641.84  | A | 995.53  | 498.27 | 978.5   | 489.76 | 977.52  | 489.26 | 9  |
| 14 | 1447.75 | 724.38  | 1429.74 | 715.37  | F | 924.49  | 462.75 | 907.47  | 454.24 | 906.48  | 453.75 | 8  |
| 15 | 1504.77 | 752.89  | 1486.76 | 743.88  | G | 777.43  | 389.22 | 760.4   | 380.7  | 759.41  | 380.21 | 7  |
| 16 | 1617.85 | 809.43  | 1599.84 | 800.42  | L | 720.4   | 360.71 | 703.38  | 352.19 | 702.39  | 351.7  | 6  |
| 17 | 1746.9  | 873.95  | 1728.88 | 864.95  | E | 607.32  | 304.16 | 590.29  | 295.65 | 589.31  | 295.16 | 5  |
| 18 | 1803.92 | 902.46  | 1785.91 | 893.46  | G | 478.28  | 239.64 | 461.25  | 231.13 |         |        | 4  |
| 19 | 1902.98 | 952     | 1884.97 | 942.99  | V | 421.26  | 211.13 | 404.23  | 202.62 |         |        | 3  |
| 20 | 2050.05 | 1025.53 | 2032.04 | 1016.52 | F | 322.19  | 161.6  | 305.16  | 153.08 |         |        | 2  |
| 21 |         |         |         |         | R | 175.12  | 88.06  | 158.09  | 79.55  |         |        | 1  |

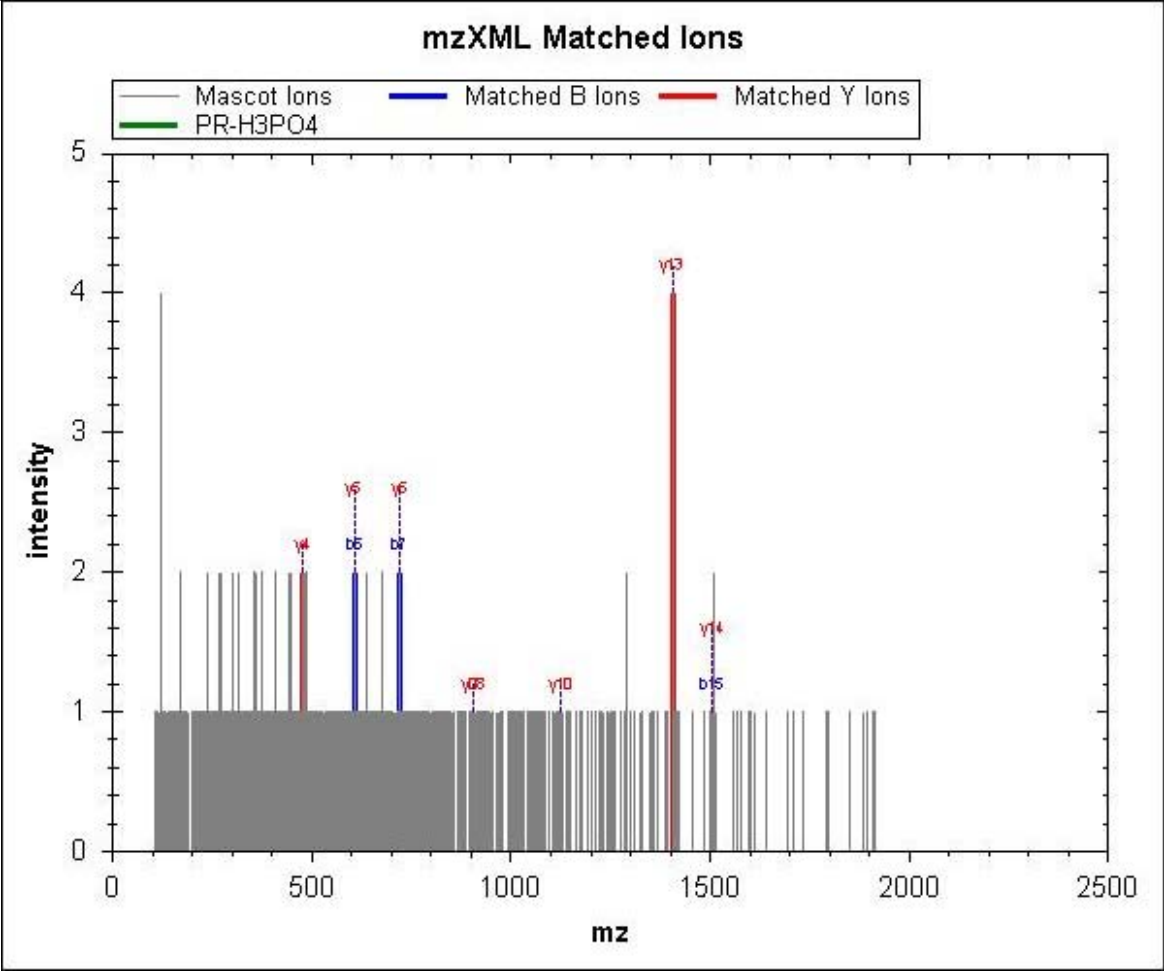

Protein index=483, ACC No:IPI00015195

Peptide index=6659 MS/MS spectrum

Sequence: FLAFESNIGDLASILK, m/z:869.4757, charge:+ 2, Modification: , Mod Position:

Score: 95.4, Raw data:WET\_B2\_090616\_03.mzxml, MS/MS Elution time: 93.13516, Scan number:5176, Mass delta:-0.0022, Rank:1

| No | b       | b++    | b*      | b*++   | b0      | b0++   | Seq | y       | y++    | y*      | y*++   | y0      | y0++   | RevNo |
|----|---------|--------|---------|--------|---------|--------|-----|---------|--------|---------|--------|---------|--------|-------|
| 1  | 148.08  | 74.54  |         |        |         |        | F   |         |        |         |        |         |        | 16    |
| 2  | 261.16  | 131.08 |         |        |         |        | L   | 1590.87 | 795.94 | 1573.85 | 787.43 | 1572.86 | 786.94 | 15    |
| 3  | 332.2   | 166.6  |         |        |         |        | A   | 1477.79 | 739.4  | 1460.76 | 730.89 | 1459.78 | 730.39 | 14    |
| 4  | 479.27  | 240.14 |         |        |         |        | F   | 1406.75 | 703.88 | 1389.73 | 695.37 | 1388.74 | 694.87 | 13    |
| 5  | 608.31  | 304.66 |         |        | 590.3   | 295.65 | E   | 1259.68 | 630.35 | 1242.66 | 621.83 | 1241.67 | 621.34 | 12    |
| 6  | 695.34  | 348.17 |         |        | 677.33  | 339.17 | S   | 1130.64 | 565.82 | 1113.61 | 557.31 | 1112.63 | 556.82 | 11    |
| 7  | 809.38  | 405.2  | 792.36  | 396.68 | 791.37  | 396.19 | N   | 1043.61 | 522.31 | 1026.58 | 513.8  | 1025.6  | 513.3  | 10    |
| 8  | 922.47  | 461.74 | 905.44  | 453.22 | 904.46  | 452.73 | I   | 929.57  | 465.29 | 912.54  | 456.77 | 911.56  | 456.28 | 9     |
| 9  | 979.49  | 490.25 | 962.46  | 481.73 | 961.48  | 481.24 | G   | 816.48  | 408.74 | 799.46  | 400.23 | 798.47  | 399.74 | 8     |
| 10 | 1094.52 | 547.76 | 1077.49 | 539.25 | 1076.5  | 538.76 | D   | 759.46  | 380.23 | 742.43  | 371.72 | 741.45  | 371.23 | 7     |
| 11 | 1207.6  | 604.3  | 1190.57 | 595.79 | 1189.59 | 595.3  | L   | 644.43  | 322.72 | 627.41  | 314.21 | 626.42  | 313.72 | 6     |
| 12 | 1278.64 | 639.82 | 1261.61 | 631.31 | 1260.63 | 630.82 | A   | 531.35  | 266.18 | 514.32  | 257.67 | 513.34  | 257.17 | 5     |
| 13 | 1365.67 | 683.34 | 1348.64 | 674.82 | 1347.66 | 674.33 | S   | 460.31  | 230.66 | 443.29  | 222.15 | 442.3   | 221.65 | 4     |
| 14 | 1478.75 | 739.88 | 1461.73 | 731.37 | 1460.74 | 730.87 | I   | 373.28  | 187.14 | 356.25  | 178.63 |         |        | 3     |
| 15 | 1591.84 | 796.42 | 1574.81 | 787.91 | 1573.83 | 787.42 | L   | 260.2   | 130.6  | 243.17  | 122.09 |         |        | 2     |
| 16 |         |        |         |        |         |        | K   | 147.11  | 74.06  | 130.09  | 65.55  |         |        | 1     |

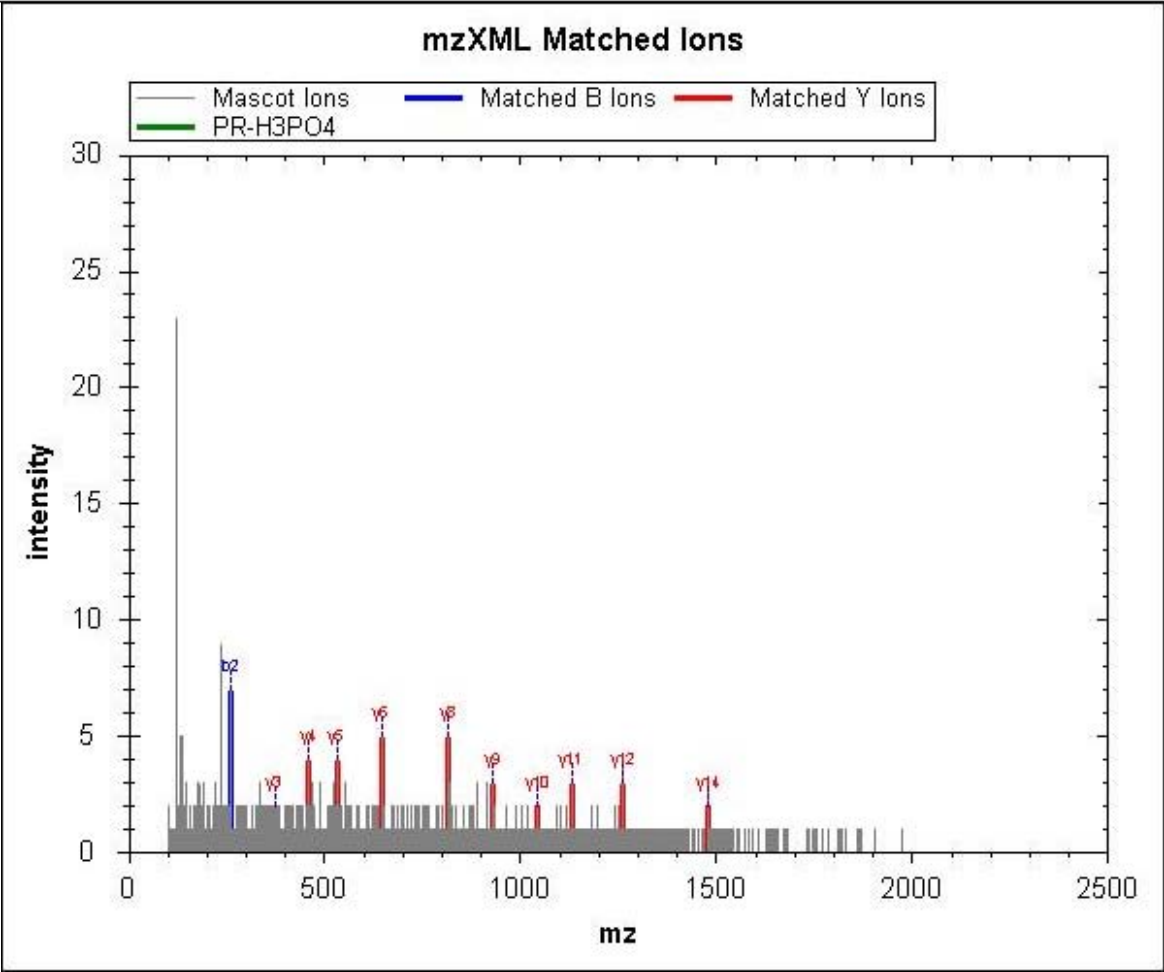

Protein index=484, ACC No:IPI00419531

Peptide index=7095 MS/MS spectrum

Sequence: VLELAQLLDQIWR, m/z:798.9629, charge:+ 2, Modification: , Mod Position:

Score: 97, Raw data:WET\_B2\_090616\_03.mzxml, MS/MS Elution time: 106.5792, Scan number:5985, Mass delta:0.0106, Rank:1

| No | b       | b++    | b*      | b*++   | b0      | b0++   | Seq | y       | y++    | y*      | y*++   | y0      | y0++   | RevNo |
|----|---------|--------|---------|--------|---------|--------|-----|---------|--------|---------|--------|---------|--------|-------|
| 1  | 100.08  | 50.54  |         |        |         |        | V   |         |        |         |        |         |        | 13    |
| 2  | 213.16  | 107.08 |         |        |         |        | L   | 1497.84 | 749.42 | 1480.82 | 740.91 | 1479.83 | 740.42 | 12    |
| 3  | 342.2   | 171.6  |         |        | 324.19  | 162.6  | E   | 1384.76 | 692.88 | 1367.73 | 684.37 | 1366.75 | 683.88 | 11    |
| 4  | 455.29  | 228.15 |         |        | 437.28  | 219.14 | L   | 1255.72 | 628.36 | 1238.69 | 619.85 | 1237.71 | 619.36 | 10    |
| 5  | 526.32  | 263.67 |         |        | 508.31  | 254.66 | A   | 1142.63 | 571.82 | 1125.61 | 563.31 | 1124.62 | 562.81 | 9     |
| 6  | 654.38  | 327.69 | 637.36  | 319.18 | 636.37  | 318.69 | Q   | 1071.59 | 536.3  | 1054.57 | 527.79 | 1053.58 | 527.3  | 8     |
| 7  | 767.47  | 384.24 | 750.44  | 375.72 | 749.46  | 375.23 | L   | 943.54  | 472.27 | 926.51  | 463.76 | 925.53  | 463.27 | 7     |
| 8  | 880.55  | 440.78 | 863.52  | 432.27 | 862.54  | 431.77 | L   | 830.45  | 415.73 | 813.43  | 407.22 | 812.44  | 406.72 | 6     |
| 9  | 995.58  | 498.29 | 978.55  | 489.78 | 977.57  | 489.29 | D   | 717.37  | 359.19 | 700.34  | 350.67 | 699.36  | 350.18 | 5     |
| 10 | 1123.64 | 562.32 | 1106.61 | 553.81 | 1105.63 | 553.32 | Q   | 602.34  | 301.67 | 585.31  | 293.16 |         |        | 4     |
| 11 | 1236.72 | 618.86 | 1219.69 | 610.35 | 1218.71 | 609.86 | I   | 474.28  | 237.64 | 457.26  | 229.13 |         |        | 3     |
| 12 | 1422.8  | 711.9  | 1405.77 | 703.39 | 1404.79 | 702.9  | W   | 361.2   | 181.1  | 344.17  | 172.59 |         |        | 2     |

|    |  |  |  |  |  |   |        |       |        |       |  |  |   |
|----|--|--|--|--|--|---|--------|-------|--------|-------|--|--|---|
| 13 |  |  |  |  |  | R | 175.12 | 88.06 | 158.09 | 79.55 |  |  | 1 |
|----|--|--|--|--|--|---|--------|-------|--------|-------|--|--|---|

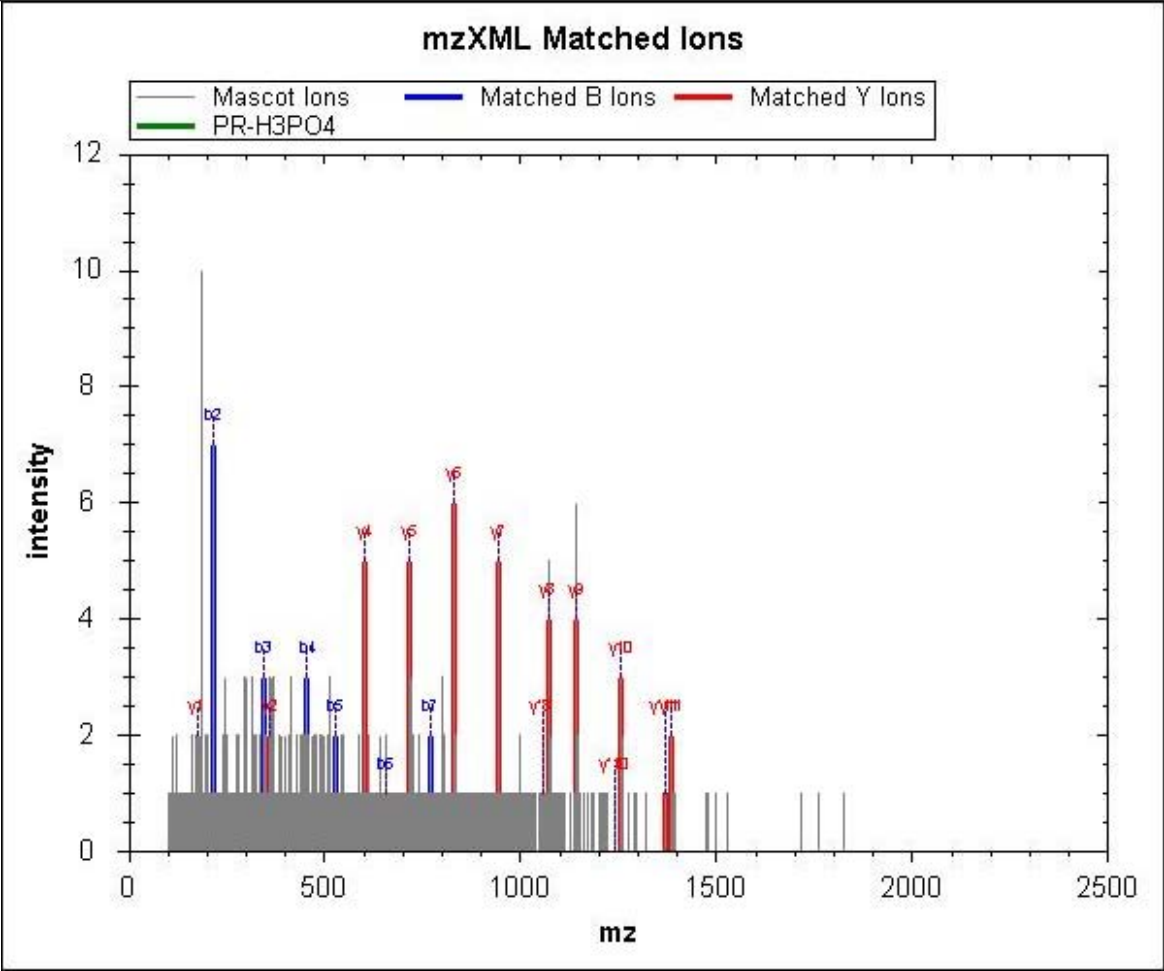

Protein index=486, ACC No:IP100008240

Peptide index=5430 MS/MS spectrum

Sequence: ITQDIFQQLK, m/z:673.8858, charge:+ 2, Modification: , Mod Position:

Score: 69.76, Raw data:WET\_B2\_090616\_03.mzxml, MS/MS Elution time: 73.1895, Scan number:4017, Mass delta:0.0011, Rank:1

| No | b       | b++    | b*      | b*++   | b0      | b0++   | Seq | y       | y++    | y*      | y*++   | y0      | y0++   | RevNo |
|----|---------|--------|---------|--------|---------|--------|-----|---------|--------|---------|--------|---------|--------|-------|
| 1  | 114.09  | 57.55  |         |        |         |        | I   |         |        |         |        |         |        | 11    |
| 2  | 215.14  | 108.07 |         |        | 197.13  | 99.07  | T   | 1233.68 | 617.35 | 1216.66 | 608.83 | 1215.67 | 608.34 | 10    |
| 3  | 343.2   | 172.1  | 326.17  | 163.59 | 325.19  | 163.1  | Q   | 1132.64 | 566.82 | 1115.61 | 558.31 | 1114.63 | 557.82 | 9     |
| 4  | 458.22  | 229.62 | 441.2   | 221.1  | 440.21  | 220.61 | D   | 1004.58 | 502.79 | 987.55  | 494.28 | 986.57  | 493.79 | 8     |
| 5  | 571.31  | 286.16 | 554.28  | 277.64 | 553.3   | 277.15 | I   | 889.55  | 445.28 | 872.52  | 436.77 |         |        | 7     |
| 6  | 718.38  | 359.69 | 701.35  | 351.18 | 700.37  | 350.69 | F   | 776.47  | 388.74 | 759.44  | 380.22 |         |        | 6     |
| 7  | 846.44  | 423.72 | 829.41  | 415.21 | 828.43  | 414.72 | Q   | 629.4   | 315.2  | 612.37  | 306.69 |         |        | 5     |
| 8  | 974.49  | 487.75 | 957.47  | 479.24 | 956.48  | 478.75 | Q   | 501.34  | 251.17 | 484.31  | 242.66 |         |        | 4     |
| 9  | 1087.58 | 544.29 | 1070.55 | 535.78 | 1069.57 | 535.29 | L   | 373.28  | 187.14 | 356.25  | 178.63 |         |        | 3     |
| 10 | 1200.66 | 600.83 | 1183.64 | 592.32 | 1182.65 | 591.83 | L   | 260.2   | 130.6  | 243.17  | 122.09 |         |        | 2     |
| 11 |         |        |         |        |         |        | K   | 147.11  | 74.06  | 130.09  | 65.55  |         |        | 1     |

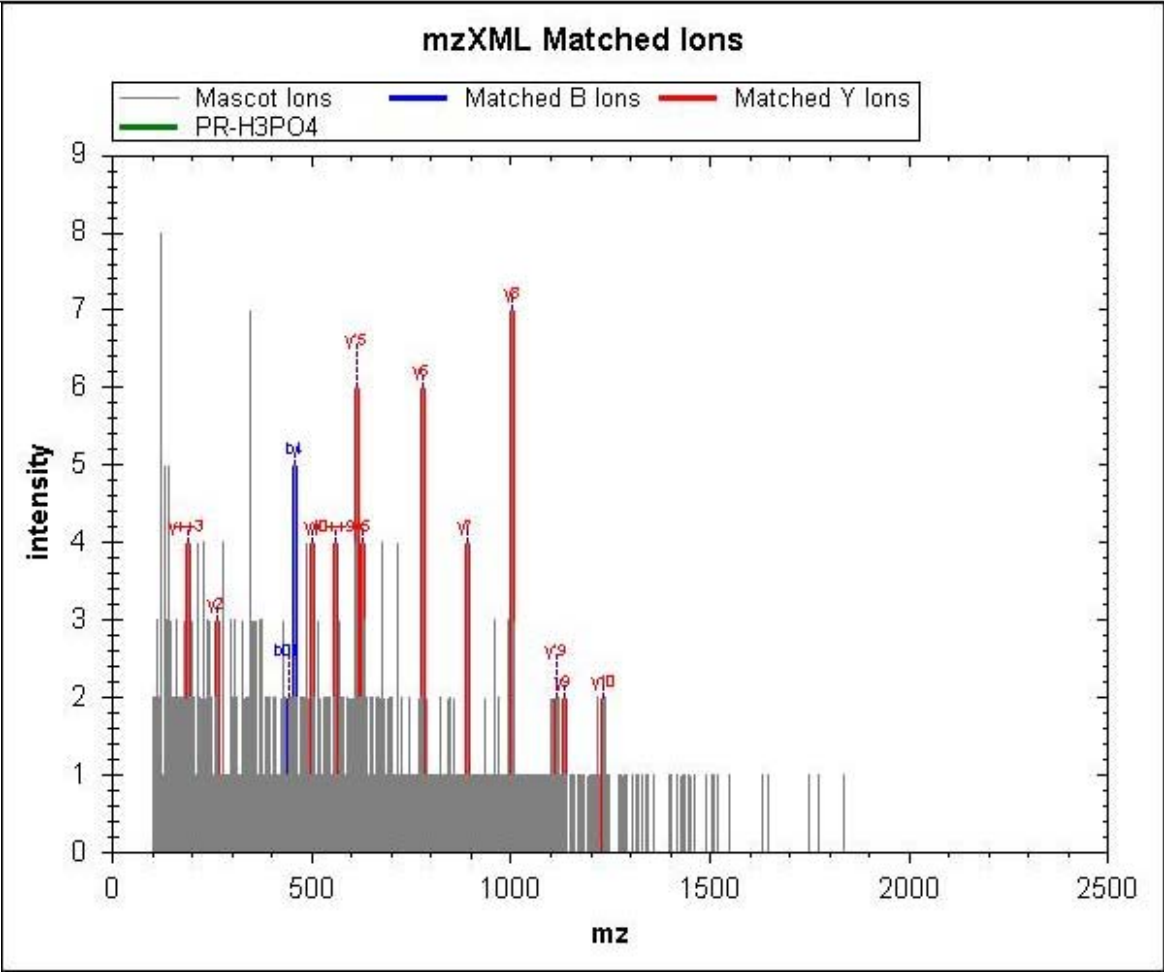

Protein index=488, ACC No:IPI00384282

Peptide index=439 MS/MS spectrum

Sequence: RKPDTIEVKQMK, m/z:491.5908, charge:+ 3, Modification: , Mod Position:

Score: 35.24, Raw data:WET\_A2\_090616\_02.mzxml, MS/MS Elution time: 19.51517, Scan number:900, Mass delta:-0.0675, Rank:1

| No | b       | b++    | b*      | b*++   | b0      | b0++   | Seq | y       | y++    | y*      | y*++   | y0      | y0++   | RevNo |
|----|---------|--------|---------|--------|---------|--------|-----|---------|--------|---------|--------|---------|--------|-------|
| 1  | 157.11  | 79.06  | 140.08  | 70.54  |         |        | R   |         |        |         |        |         |        | 12    |
| 2  | 285.2   | 143.11 | 268.18  | 134.59 |         |        | K   | 1299.63 | 650.32 | 1282.6  | 641.81 | 1281.62 | 641.31 | 11    |
| 3  | 382.26  | 191.63 | 365.23  | 183.12 |         |        | P   | 1171.53 | 586.27 | 1154.51 | 577.76 | 1153.52 | 577.27 | 10    |
| 4  | 497.28  | 249.15 | 480.26  | 240.63 | 479.27  | 240.14 | D   | 1074.48 | 537.74 | 1057.46 | 529.23 | 1056.47 | 528.74 | 9     |
| 5  | 598.33  | 299.67 | 581.3   | 291.16 | 580.32  | 290.66 | T   | 959.45  | 480.23 | 942.43  | 471.72 | 941.44  | 471.23 | 8     |
| 6  | 711.41  | 356.21 | 694.39  | 347.7  | 693.4   | 347.21 | I   | 858.41  | 429.71 | 841.38  | 421.19 | 840.4   | 420.7  | 7     |
| 7  | 840.46  | 420.73 | 823.43  | 412.22 | 822.45  | 411.73 | E   | 745.32  | 373.17 | 728.3   | 364.65 | 727.31  | 364.16 | 6     |
| 8  | 939.53  | 470.27 | 922.5   | 461.75 | 921.52  | 461.26 | V   | 616.28  | 308.64 | 599.25  | 300.13 |         |        | 5     |
| 9  | 1050.53 | 525.77 | 1033.5  | 517.25 | 1032.52 | 516.76 | X   | 517.21  | 259.11 | 500.19  | 250.6  |         |        | 4     |
| 10 | 1178.58 | 589.8  | 1161.56 | 581.28 | 1160.57 | 580.79 | Q   | 406.21  | 203.61 | 389.19  | 195.1  |         |        | 3     |
| 11 | 1309.62 | 655.32 | 1292.6  | 646.8  | 1291.61 | 646.31 | M   | 278.15  | 139.58 | 261.13  | 131.07 |         |        | 2     |
| 12 |         |        |         |        |         |        | K   | 147.11  | 74.06  | 130.09  | 65.55  |         |        | 1     |

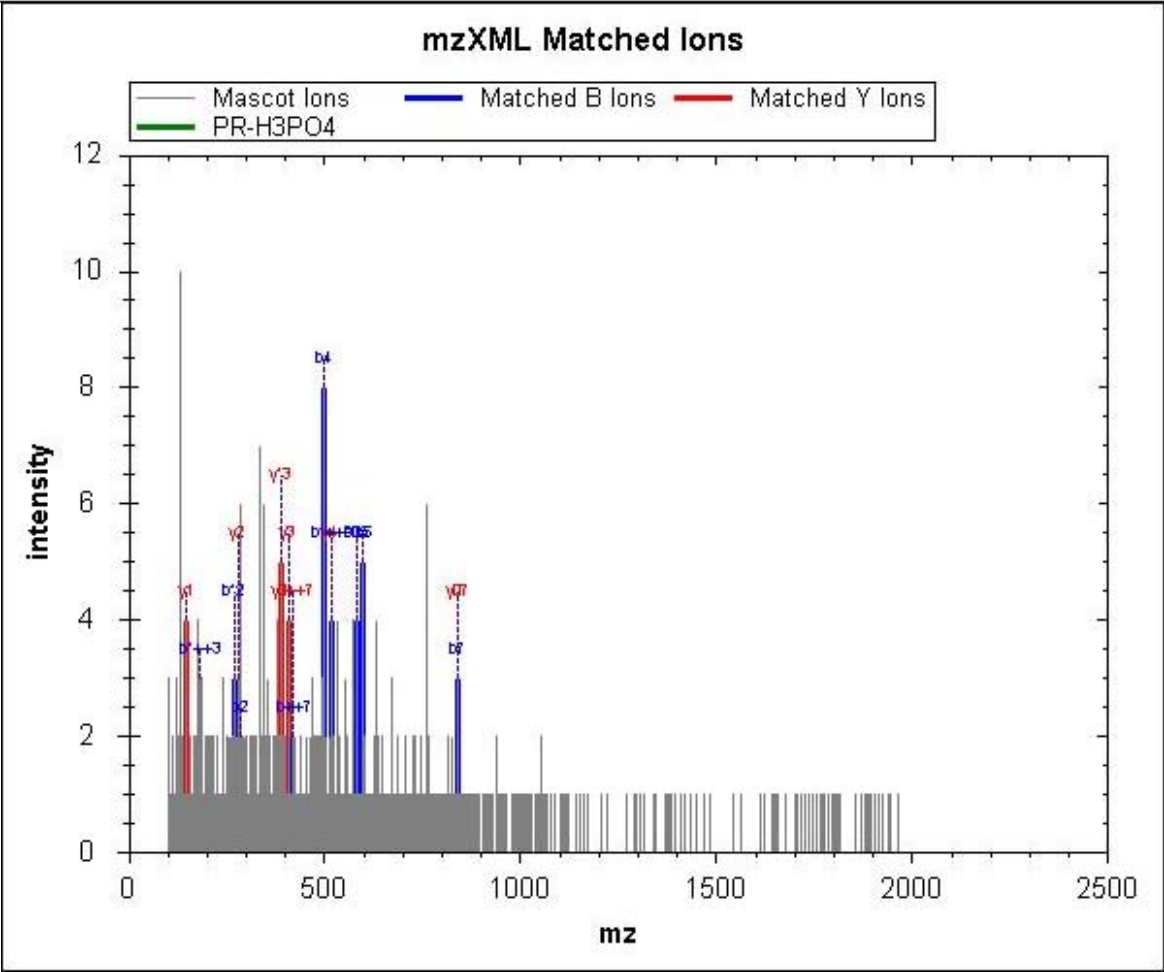

Protein index=489, ACC No:IPI00339269

Peptide index=4145 MS/MS spectrum

Sequence: IINEPTAAAIAYGLDR, m/z:844.4148, charge:+ 2, Modification: , Mod Position:

Score: 91.66, Raw data:WET\_B3\_090616\_02.mzxml, MS/MS Elution time: 59.55717, Scan number:3246, Mass delta:-0.0182, Rank:1

| No | b       | b++    | b*      | b*++   | b0      | b0++   | Seq | y       | y++    | y*      | y*++   | y0      | y0++   | RevNo |
|----|---------|--------|---------|--------|---------|--------|-----|---------|--------|---------|--------|---------|--------|-------|
| 1  | 114.09  | 57.55  |         |        |         |        | I   |         |        |         |        |         |        | 16    |
| 2  | 227.18  | 114.09 |         |        |         |        | I   | 1574.82 | 787.91 | 1557.79 | 779.4  | 1556.81 | 778.91 | 15    |
| 3  | 341.22  | 171.11 | 324.19  | 162.6  |         |        | N   | 1461.73 | 731.37 | 1444.71 | 722.86 | 1443.72 | 722.36 | 14    |
| 4  | 470.26  | 235.63 | 453.23  | 227.12 | 452.25  | 226.63 | E   | 1347.69 | 674.35 | 1330.66 | 665.84 | 1329.68 | 665.34 | 13    |
| 5  | 567.31  | 284.16 | 550.29  | 275.65 | 549.3   | 275.16 | P   | 1218.65 | 609.83 | 1201.62 | 601.31 | 1200.64 | 600.82 | 12    |
| 6  | 668.36  | 334.68 | 651.33  | 326.17 | 650.35  | 325.68 | T   | 1121.59 | 561.3  | 1104.57 | 552.79 | 1103.58 | 552.3  | 11    |
| 7  | 739.4   | 370.2  | 722.37  | 361.69 | 721.39  | 361.2  | A   | 1020.55 | 510.78 | 1003.52 | 502.26 | 1002.54 | 501.77 | 10    |
| 8  | 810.44  | 405.72 | 793.41  | 397.21 | 792.42  | 396.72 | A   | 949.51  | 475.26 | 932.48  | 466.75 | 931.5   | 466.25 | 9     |
| 9  | 881.47  | 441.24 | 864.45  | 432.73 | 863.46  | 432.23 | A   | 878.47  | 439.74 | 861.45  | 431.23 | 860.46  | 430.73 | 8     |
| 10 | 994.56  | 497.78 | 977.53  | 489.27 | 976.55  | 488.78 | I   | 807.44  | 404.22 | 790.41  | 395.71 | 789.43  | 395.22 | 7     |
| 11 | 1065.59 | 533.3  | 1048.57 | 524.79 | 1047.58 | 524.3  | A   | 694.35  | 347.68 | 677.33  | 339.17 | 676.34  | 338.67 | 6     |
| 12 | 1228.66 | 614.83 | 1211.63 | 606.32 | 1210.65 | 605.83 | Y   | 623.31  | 312.16 | 606.29  | 303.65 | 605.3   | 303.16 | 5     |

|    |         |        |         |        |         |        |   |        |        |        |        |        |        |   |
|----|---------|--------|---------|--------|---------|--------|---|--------|--------|--------|--------|--------|--------|---|
| 13 | 1285.68 | 643.34 | 1268.65 | 634.83 | 1267.67 | 634.34 | G | 460.25 | 230.63 | 443.22 | 222.12 | 442.24 | 221.62 | 4 |
| 14 | 1398.76 | 699.89 | 1381.74 | 691.37 | 1380.75 | 690.88 | L | 403.23 | 202.12 | 386.2  | 193.61 | 385.22 | 193.11 | 3 |
| 15 | 1513.79 | 757.4  | 1496.76 | 748.89 | 1495.78 | 748.39 | D | 290.15 | 145.58 | 273.12 | 137.06 | 272.14 | 136.57 | 2 |
| 16 |         |        |         |        |         |        | R | 175.12 | 88.06  | 158.09 | 79.55  |        |        | 1 |

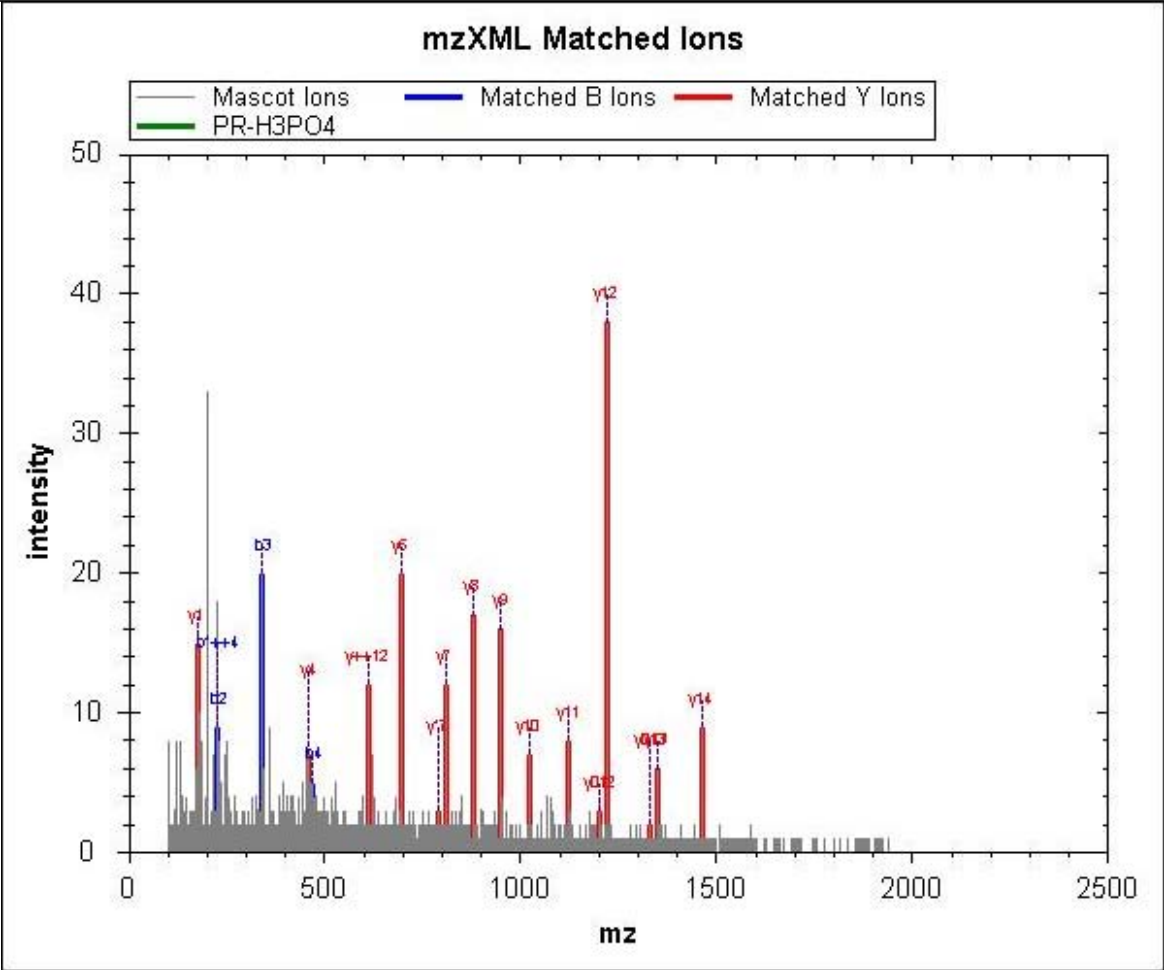

Protein index=490, ACC No:IPI00054042

Peptide index=1065 MS/MS spectrum

Sequence: RPELLTHSTTEVTQPR, m/z:622.3182, charge:+ 3, Modification: , Mod Position:

Score: 59.64, Raw data:WET\_A2\_090616\_02.mzxml, MS/MS Elution time: 28.761, Scan number:1441, Mass delta:-0.0475, Rank:1

| No | b      | b++    | b*     | b*++   | b0     | b0++   | Seq | y       | y++    | y*      | y*++   | y0      | y0++   | RevNo |
|----|--------|--------|--------|--------|--------|--------|-----|---------|--------|---------|--------|---------|--------|-------|
| 1  | 157.11 | 79.06  | 140.08 | 70.54  |        |        | R   |         |        |         |        |         |        | 16    |
| 2  | 254.16 | 127.58 | 237.13 | 119.07 |        |        | P   | 1708.89 | 854.95 | 1691.86 | 846.43 | 1690.88 | 845.94 | 15    |
| 3  | 383.2  | 192.11 | 366.18 | 183.59 | 365.19 | 183.1  | E   | 1611.83 | 806.42 | 1594.81 | 797.91 | 1593.82 | 797.42 | 14    |
| 4  | 496.29 | 248.65 | 479.26 | 240.13 | 478.28 | 239.64 | L   | 1482.79 | 741.9  | 1465.76 | 733.39 | 1464.78 | 732.89 | 13    |
| 5  | 609.37 | 305.19 | 592.35 | 296.68 | 591.36 | 296.18 | L   | 1369.71 | 685.36 | 1352.68 | 676.84 | 1351.7  | 676.35 | 12    |
| 6  | 710.42 | 355.71 | 693.39 | 347.2  | 692.41 | 346.71 | T   | 1256.62 | 628.82 | 1239.6  | 620.3  | 1238.61 | 619.81 | 11    |
| 7  | 847.48 | 424.24 | 830.45 | 415.73 | 829.47 | 415.24 | H   | 1155.58 | 578.29 | 1138.55 | 569.78 | 1137.56 | 569.29 | 10    |
| 8  | 934.51 | 467.76 | 917.48 | 459.25 | 916.5  | 458.75 | S   | 1018.52 | 509.76 | 1001.49 | 501.25 | 1000.51 | 500.76 | 9     |



|    |         |        |        |        |        |        |   |        |        |        |        |        |        |   |
|----|---------|--------|--------|--------|--------|--------|---|--------|--------|--------|--------|--------|--------|---|
| 5  | 545.26  | 273.13 | 528.23 | 264.62 |        |        | C | 707.39 | 354.2  | 690.36 | 345.68 | 689.38 | 345.19 | 6 |
| 6  | 701.36  | 351.18 | 684.33 | 342.67 |        |        | R | 604.38 | 302.69 | 587.35 | 294.18 | 586.37 | 293.69 | 5 |
| 7  | 788.39  | 394.7  | 771.36 | 386.19 | 770.38 | 385.69 | S | 448.28 | 224.64 | 431.25 | 216.13 | 430.27 | 215.64 | 4 |
| 8  | 889.44  | 445.22 | 872.41 | 436.71 | 871.43 | 436.22 | T | 361.24 | 181.13 | 344.22 | 172.61 | 343.23 | 172.12 | 3 |
| 9  | 1002.52 | 501.76 | 985.5  | 493.25 | 984.51 | 492.76 | I | 260.2  | 130.6  | 243.17 | 122.09 |        |        | 2 |
| 10 |         |        |        |        |        |        | K | 147.11 | 74.06  | 130.09 | 65.55  |        |        | 1 |

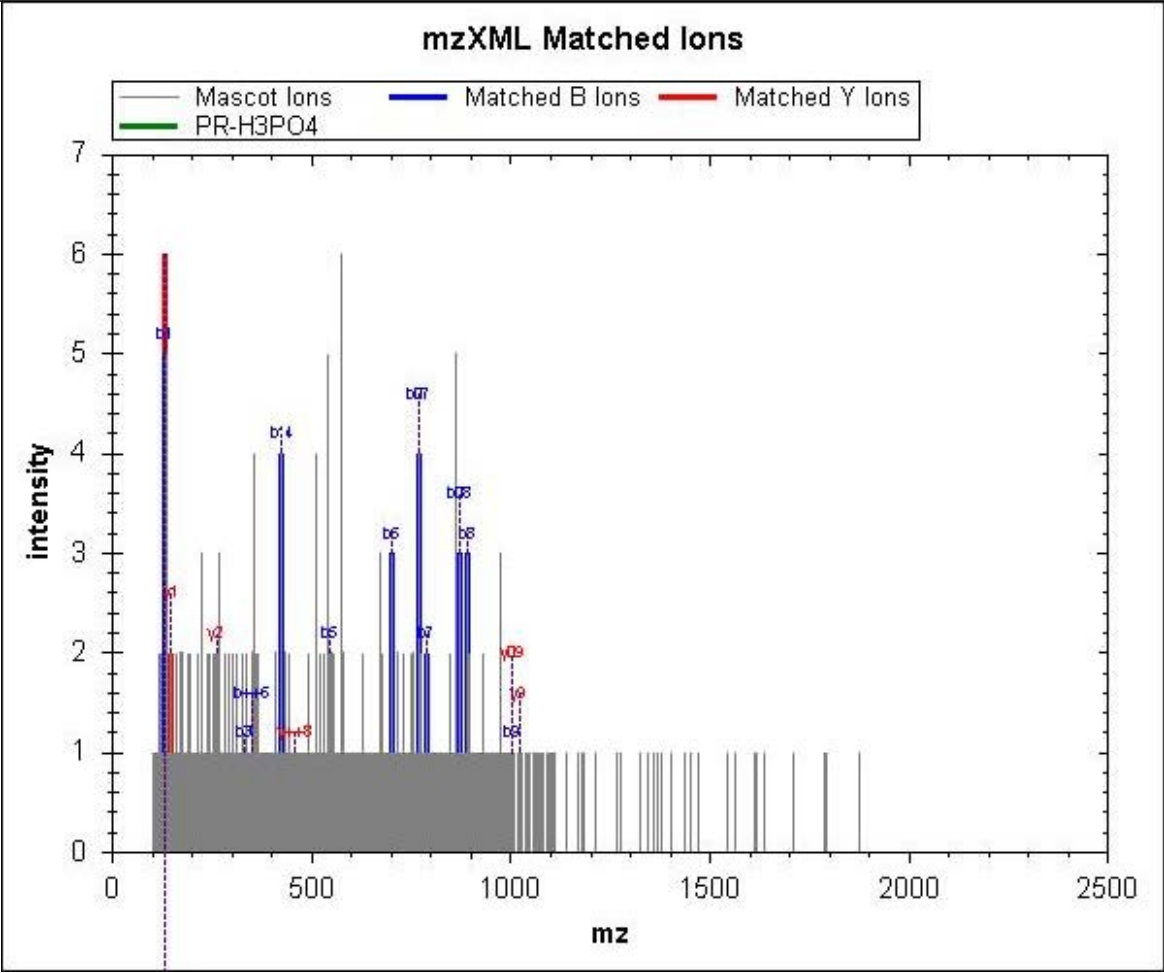

Protein index=495, ACC No:IPI00033153

Peptide index=6481 MS/MS spectrum

Sequence: LNVVAFLNELPK, m/z:678.8633, charge:+ 2, Modification: , Mod Position:

Score: 55.89, Raw data:WET\_B3\_090616\_03.mzxml, MS/MS Elution time: 88.92284, Scan number:4961, Mass delta:0.0053, Rank:1

| No | b      | b++    | b*     | b*++   | b0 | b0++ | Seq | y       | y++    | y*      | y*++   | y0      | y0++   | RevNo |
|----|--------|--------|--------|--------|----|------|-----|---------|--------|---------|--------|---------|--------|-------|
| 1  | 114.09 | 57.55  |        |        |    |      | L   |         |        |         |        |         |        | 12    |
| 2  | 228.13 | 114.57 | 211.11 | 106.06 |    |      | N   | 1243.7  | 622.36 | 1226.68 | 613.84 | 1225.69 | 613.35 | 11    |
| 3  | 327.2  | 164.1  | 310.18 | 155.59 |    |      | V   | 1129.66 | 565.33 | 1112.64 | 556.82 | 1111.65 | 556.33 | 10    |
| 4  | 426.27 | 213.64 | 409.24 | 205.13 |    |      | V   | 1030.59 | 515.8  | 1013.57 | 507.29 | 1012.58 | 506.79 | 9     |
| 5  | 497.31 | 249.16 | 480.28 | 240.64 |    |      | A   | 931.52  | 466.27 | 914.5   | 457.75 | 913.51  | 457.26 | 8     |
| 6  | 644.38 | 322.69 | 627.35 | 314.18 |    |      | F   | 860.49  | 430.75 | 843.46  | 422.23 | 842.48  | 421.74 | 7     |

|    |         |        |         |        |         |        |   |        |        |        |        |        |        |   |
|----|---------|--------|---------|--------|---------|--------|---|--------|--------|--------|--------|--------|--------|---|
| 7  | 757.46  | 379.23 | 740.43  | 370.72 |         |        | L | 713.42 | 357.21 | 696.39 | 348.7  | 695.41 | 348.21 | 6 |
| 8  | 871.5   | 436.26 | 854.48  | 427.74 |         |        | N | 600.34 | 300.67 | 583.31 | 292.16 | 582.32 | 291.67 | 5 |
| 9  | 1000.55 | 500.78 | 983.52  | 492.26 | 982.54  | 491.77 | E | 486.29 | 243.65 | 469.27 | 235.14 | 468.28 | 234.64 | 4 |
| 10 | 1113.63 | 557.32 | 1096.6  | 548.81 | 1095.62 | 548.31 | L | 357.25 | 179.13 | 340.22 | 170.62 |        |        | 3 |
| 11 | 1210.68 | 605.85 | 1193.66 | 597.33 | 1192.67 | 596.84 | P | 244.17 | 122.59 | 227.14 | 114.07 |        |        | 2 |
| 12 |         |        |         |        |         |        | K | 147.11 | 74.06  | 130.09 | 65.55  |        |        | 1 |

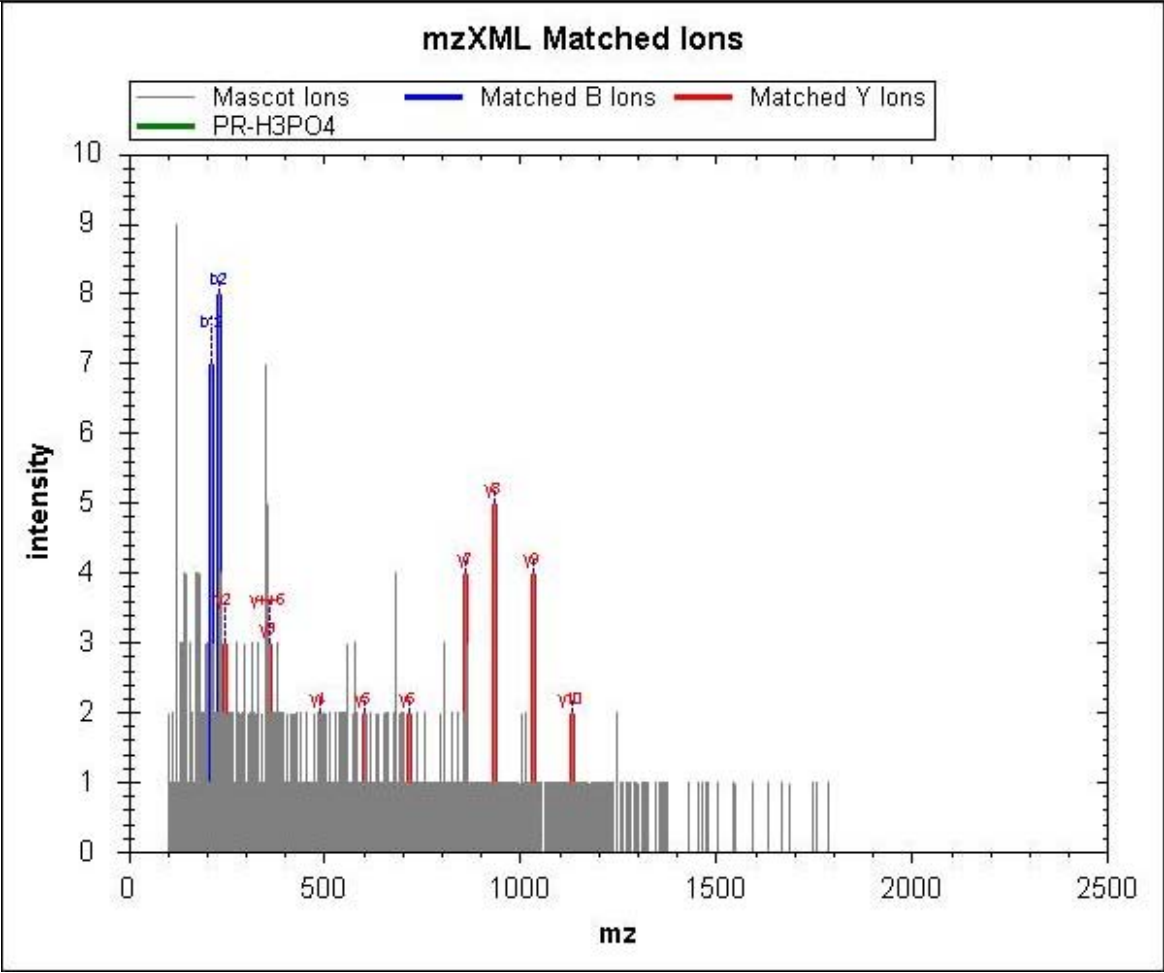

Protein index=496, ACC No:IPI00013070

Peptide index=601 MS/MS spectrum

Sequence: HLPSTEPDPHVVR, m/z:495.2272, charge:+ 3, Modification: , Mod Position:

Score: 67.53, Raw data:WET\_B2\_090616\_03.mzxml, MS/MS Elution time: 21.12667, Scan number:993, Mass delta:-0.0125, Rank:1

| No | b      | b++    | b0     | b0++   | Seq | y       | y++    | y*      | y*++   | y0      | y0++   | RevNo |
|----|--------|--------|--------|--------|-----|---------|--------|---------|--------|---------|--------|-------|
| 1  | 138.07 | 69.54  |        |        | H   |         |        |         |        |         |        | 13    |
| 2  | 251.15 | 126.08 |        |        | L   | 1346.71 | 673.86 | 1329.68 | 665.34 | 1328.7  | 664.85 | 12    |
| 3  | 348.2  | 174.61 |        |        | P   | 1233.62 | 617.31 | 1216.6  | 608.8  | 1215.61 | 608.31 | 11    |
| 4  | 435.24 | 218.12 | 417.22 | 209.12 | S   | 1136.57 | 568.79 | 1119.54 | 560.28 | 1118.56 | 559.78 | 10    |
| 5  | 536.28 | 268.64 | 518.27 | 259.64 | T   | 1049.54 | 525.27 | 1032.51 | 516.76 | 1031.53 | 516.27 | 9     |
| 6  | 665.33 | 333.17 | 647.31 | 324.16 | E   | 948.49  | 474.75 | 931.46  | 466.24 | 930.48  | 465.74 | 8     |

|    |         |        |         |        |   |        |        |        |        |        |        |   |
|----|---------|--------|---------|--------|---|--------|--------|--------|--------|--------|--------|---|
| 7  | 762.38  | 381.69 | 744.37  | 372.69 | P | 819.45 | 410.23 | 802.42 | 401.71 | 801.44 | 401.22 | 7 |
| 8  | 877.41  | 439.21 | 859.39  | 430.2  | D | 722.39 | 361.7  | 705.37 | 353.19 | 704.38 | 352.7  | 6 |
| 9  | 974.46  | 487.73 | 956.45  | 478.73 | P | 607.37 | 304.19 | 590.34 | 295.67 |        |        | 5 |
| 10 | 1111.52 | 556.26 | 1093.51 | 547.26 | H | 510.31 | 255.66 | 493.29 | 247.15 |        |        | 4 |
| 11 | 1210.59 | 605.8  | 1192.57 | 596.79 | V | 373.26 | 187.13 | 356.23 | 178.62 |        |        | 3 |
| 12 | 1309.65 | 655.33 | 1291.64 | 646.33 | V | 274.19 | 137.6  | 257.16 | 129.08 |        |        | 2 |
| 13 |         |        |         |        | R | 175.12 | 88.06  | 158.09 | 79.55  |        |        | 1 |

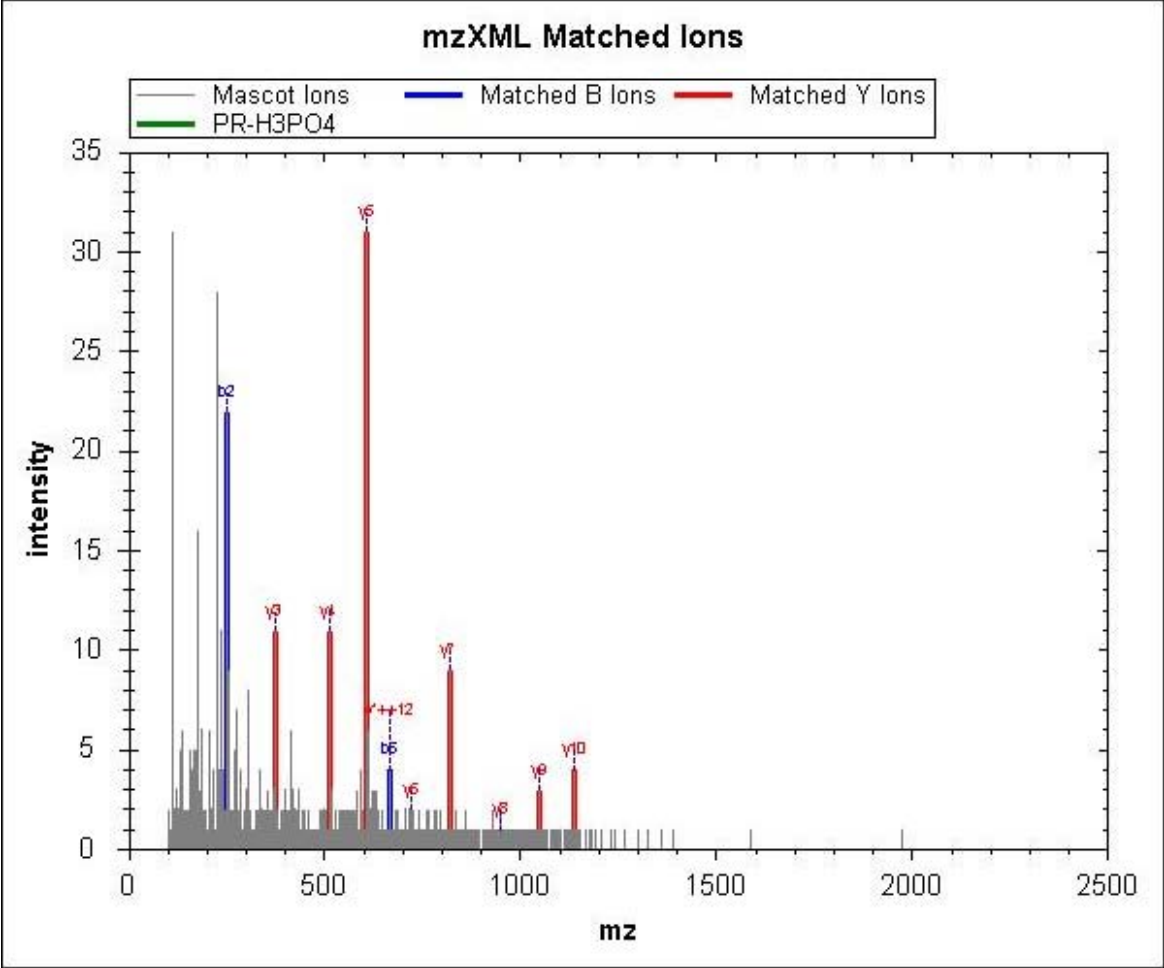

Protein index=498, ACC No:IPI00303105

Peptide index=1663 MS/MS spectrum

Sequence: VIGQDSSEIHK, m/z:453.8707, charge:+ 3, Modification: , Mod Position:

Score: 39.77, Raw data:WET\_A2\_090616\_03.mzxml, MS/MS Elution time: 36.2475, Scan number:1870, Mass delta:-0.0928, Rank:1

| No | b      | b++    | b*     | b*++   | b0     | b0++   | Seq | y       | y++    | y*      | y*++   | y0      | y0++   | RevNo |
|----|--------|--------|--------|--------|--------|--------|-----|---------|--------|---------|--------|---------|--------|-------|
| 1  | 100.08 | 50.54  |        |        |        |        | V   |         |        |         |        |         |        | 12    |
| 2  | 213.16 | 107.08 |        |        |        |        | I   | 1260.62 | 630.81 | 1243.6  | 622.3  | 1242.61 | 621.81 | 11    |
| 3  | 270.18 | 135.59 |        |        |        |        | G   | 1147.54 | 574.27 | 1130.51 | 565.76 | 1129.53 | 565.27 | 10    |
| 4  | 398.24 | 199.62 | 381.21 | 191.11 |        |        | Q   | 1090.52 | 545.76 | 1073.49 | 537.25 | 1072.51 | 536.76 | 9     |
| 5  | 513.27 | 257.14 | 496.24 | 248.62 | 495.26 | 248.13 | D   | 962.46  | 481.73 | 945.43  | 473.22 | 944.45  | 472.73 | 8     |

|    |         |        |         |        |         |        |   |        |        |        |        |        |        |   |
|----|---------|--------|---------|--------|---------|--------|---|--------|--------|--------|--------|--------|--------|---|
| 6  | 600.3   | 300.65 | 583.27  | 292.14 | 582.29  | 291.65 | S | 847.43 | 424.22 | 830.4  | 415.71 | 829.42 | 415.21 | 7 |
| 7  | 687.33  | 344.17 | 670.3   | 335.66 | 669.32  | 335.16 | S | 760.4  | 380.7  | 743.37 | 372.19 | 742.39 | 371.7  | 6 |
| 8  | 816.37  | 408.69 | 799.35  | 400.18 | 798.36  | 399.69 | E | 673.37 | 337.19 | 656.34 | 328.67 | 655.36 | 328.18 | 5 |
| 9  | 929.46  | 465.23 | 912.43  | 456.72 | 911.45  | 456.23 | I | 544.32 | 272.67 | 527.3  | 264.15 |        |        | 4 |
| 10 | 1066.52 | 533.76 | 1049.49 | 525.25 | 1048.51 | 524.76 | H | 431.24 | 216.12 | 414.21 | 207.61 |        |        | 3 |
| 11 | 1213.58 | 607.3  | 1196.56 | 598.78 | 1195.57 | 598.29 | F | 294.18 | 147.59 | 277.15 | 139.08 |        |        | 2 |
| 12 |         |        |         |        |         |        | K | 147.11 | 74.06  | 130.09 | 65.55  |        |        | 1 |

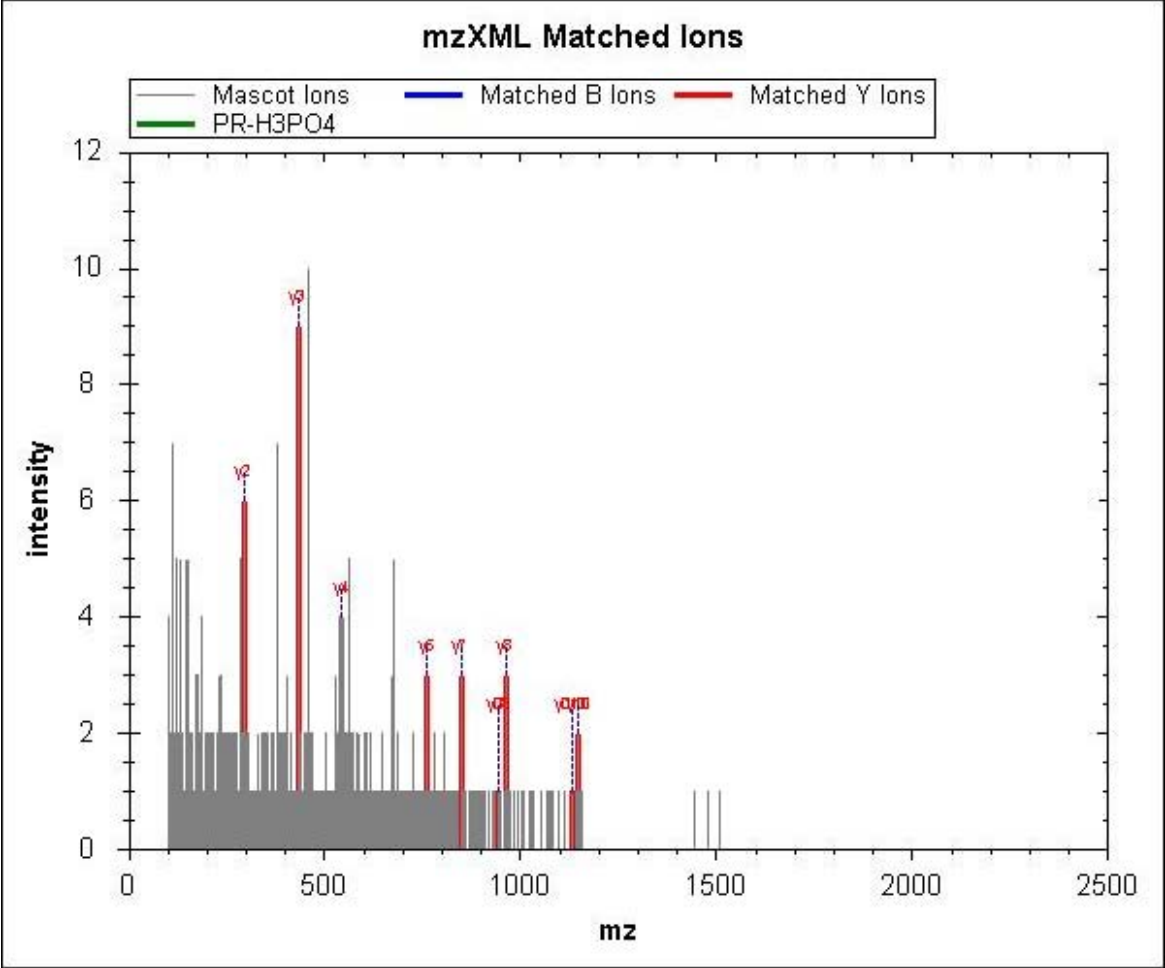

Protein index=499, ACC No:IPI00396174

Peptide index=3776 MS/MS spectrum

Sequence: GENIEDIPK, m/z:507.7676, charge:+ 2, Modification: , Mod Position:

Score: 37.43, Raw data:WET\_A2\_090616\_03.mzxml, MS/MS Elution time: 55.87716, Scan number:3010, Mass delta:0.0178, Rank:2

| No | b      | b++    | b*     | b*++   | b0     | b0++   | Seq | y      | y++    | y*     | y*++   | y0     | y0++   | RevNo |
|----|--------|--------|--------|--------|--------|--------|-----|--------|--------|--------|--------|--------|--------|-------|
| 1  | 58.03  | 29.52  |        |        |        |        | G   |        |        |        |        |        |        | 9     |
| 2  | 187.07 | 94.04  |        |        | 169.06 | 85.03  | E   | 957.49 | 479.25 | 940.46 | 470.73 | 939.48 | 470.24 | 8     |
| 3  | 301.11 | 151.06 | 284.09 | 142.55 | 283.1  | 142.06 | N   | 828.45 | 414.73 | 811.42 | 406.21 | 810.44 | 405.72 | 7     |
| 4  | 414.2  | 207.6  | 397.17 | 199.09 | 396.19 | 198.6  | I   | 714.4  | 357.71 | 697.38 | 349.19 | 696.39 | 348.7  | 6     |
| 5  | 543.24 | 272.12 | 526.21 | 263.61 | 525.23 | 263.12 | E   | 601.32 | 301.16 | 584.29 | 292.65 | 583.31 | 292.16 | 5     |

|   |        |        |        |        |        |        |   |        |        |        |        |        |        |   |
|---|--------|--------|--------|--------|--------|--------|---|--------|--------|--------|--------|--------|--------|---|
| 6 | 658.27 | 329.64 | 641.24 | 321.12 | 640.26 | 320.63 | D | 472.28 | 236.64 | 455.25 | 228.13 | 454.27 | 227.64 | 4 |
| 7 | 771.35 | 386.18 | 754.33 | 377.67 | 753.34 | 377.17 | I | 357.25 | 179.13 | 340.22 | 170.62 |        |        | 3 |
| 8 | 868.4  | 434.71 | 851.38 | 426.19 | 850.39 | 425.7  | P | 244.17 | 122.59 | 227.14 | 114.07 |        |        | 2 |
| 9 |        |        |        |        |        |        | K | 147.11 | 74.06  | 130.09 | 65.55  |        |        | 1 |

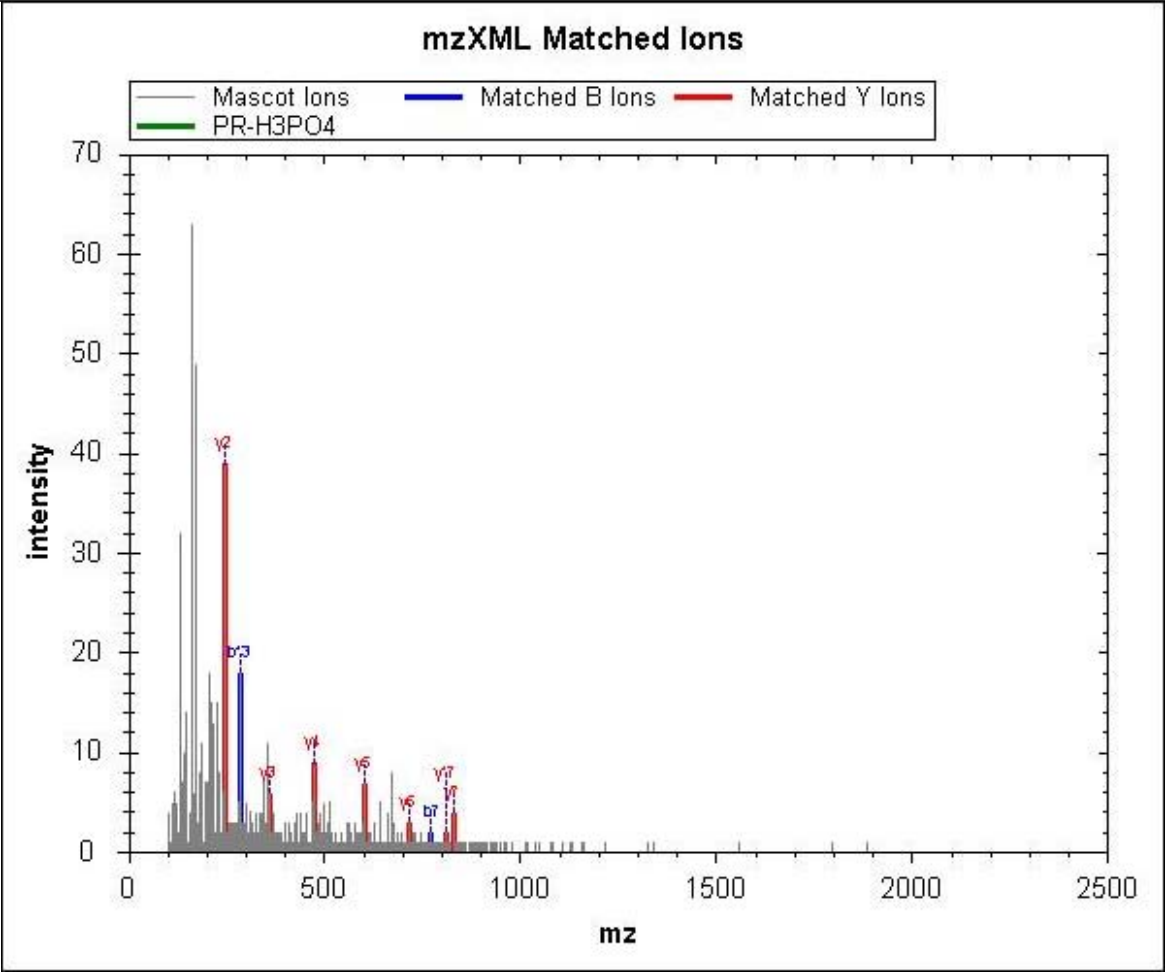

Protein index=500, ACC No:IPI00001890

Peptide index=6248 MS/MS spectrum

Sequence: SIATLAITTLK, m/z:622.8513, charge:+ 2, Modification: , Mod Position:

Score: 76.15, Raw data:WET\_A2\_090616\_03.mzxml, MS/MS Elution time: 84.99467, Scan number:4702, Mass delta:-0.087, Rank:1

| No | b      | b++    | b0     | b0++   | Seq | y       | y++    | y*      | y*++   | y0      | y0++   | RevNo |
|----|--------|--------|--------|--------|-----|---------|--------|---------|--------|---------|--------|-------|
| 1  | 88.04  | 44.52  | 70.03  | 35.52  | S   |         |        |         |        |         |        | 12    |
| 2  | 201.12 | 101.07 | 183.11 | 92.06  | I   | 1157.75 | 579.38 | 1140.72 | 570.87 | 1139.74 | 570.37 | 11    |
| 3  | 272.16 | 136.58 | 254.15 | 127.58 | A   | 1044.67 | 522.84 | 1027.64 | 514.32 | 1026.66 | 513.83 | 10    |
| 4  | 373.21 | 187.11 | 355.2  | 178.1  | T   | 973.63  | 487.32 | 956.6   | 478.8  | 955.62  | 478.31 | 9     |
| 5  | 486.29 | 243.65 | 468.28 | 234.64 | L   | 872.58  | 436.79 | 855.55  | 428.28 | 854.57  | 427.79 | 8     |
| 6  | 557.33 | 279.17 | 539.32 | 270.16 | A   | 759.5   | 380.25 | 742.47  | 371.74 | 741.49  | 371.25 | 7     |
| 7  | 670.41 | 335.71 | 652.4  | 326.71 | I   | 688.46  | 344.73 | 671.43  | 336.22 | 670.45  | 335.73 | 6     |
| 8  | 771.46 | 386.23 | 753.45 | 377.23 | T   | 575.38  | 288.19 | 558.35  | 279.68 | 557.37  | 279.19 | 5     |

|    |         |        |         |        |   |        |        |        |        |        |        |   |
|----|---------|--------|---------|--------|---|--------|--------|--------|--------|--------|--------|---|
| 9  | 872.51  | 436.76 | 854.5   | 427.75 | T | 474.33 | 237.67 | 457.3  | 229.15 | 456.32 | 228.66 | 4 |
| 10 | 985.59  | 493.3  | 967.58  | 484.29 | L | 373.28 | 187.14 | 356.25 | 178.63 |        |        | 3 |
| 11 | 1098.68 | 549.84 | 1080.67 | 540.84 | L | 260.2  | 130.6  | 243.17 | 122.09 |        |        | 2 |
| 12 |         |        |         |        | K | 147.11 | 74.06  | 130.09 | 65.55  |        |        | 1 |

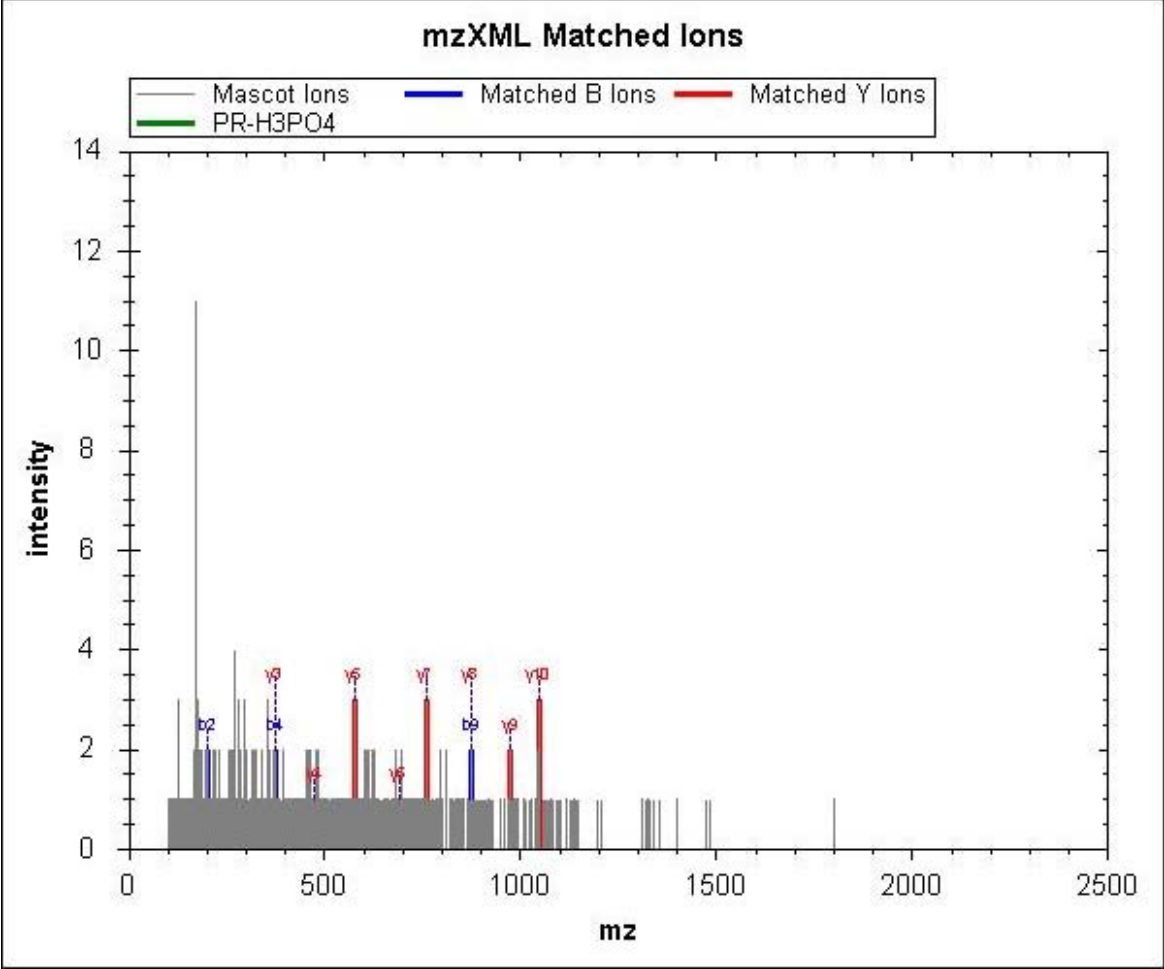

Protein index=501, ACC No:IPI00032630

Peptide index=6632 MS/MS spectrum

Sequence: IPGVTPAAIINLLR, m/z:724.4065, charge:+ 2, Modification: , Mod Position:

Score: 76.92, Raw data:WET\_B2\_090616\_01.mzxml, MS/MS Elution time: 92.53217, Scan number:5138, Mass delta:-0.0043, Rank:1

| No | b      | b++    | b* | b*++ | b0     | b0++   | Seq | y       | y++    | y*      | y*++   | y0      | y0++   | RevNo |
|----|--------|--------|----|------|--------|--------|-----|---------|--------|---------|--------|---------|--------|-------|
| 1  | 114.09 | 57.55  |    |      |        |        | I   |         |        |         |        |         |        | 14    |
| 2  | 211.14 | 106.08 |    |      |        |        | P   | 1334.82 | 667.91 | 1317.79 | 659.4  | 1316.8  | 658.91 | 13    |
| 3  | 268.17 | 134.59 |    |      |        |        | G   | 1237.76 | 619.39 | 1220.74 | 610.87 | 1219.75 | 610.38 | 12    |
| 4  | 367.23 | 184.12 |    |      |        |        | V   | 1180.74 | 590.87 | 1163.71 | 582.36 | 1162.73 | 581.87 | 11    |
| 5  | 468.28 | 234.64 |    |      | 450.27 | 225.64 | T   | 1081.67 | 541.34 | 1064.65 | 532.83 | 1063.66 | 532.33 | 10    |
| 6  | 565.33 | 283.17 |    |      | 547.32 | 274.17 | P   | 980.63  | 490.82 | 963.6   | 482.3  |         |        | 9     |
| 7  | 636.37 | 318.69 |    |      | 618.36 | 309.68 | A   | 883.57  | 442.29 | 866.55  | 433.78 |         |        | 8     |
| 8  | 707.41 | 354.21 |    |      | 689.4  | 345.2  | A   | 812.54  | 406.77 | 795.51  | 398.26 |         |        | 7     |

|    |         |        |         |        |         |        |   |        |        |        |        |  |  |   |
|----|---------|--------|---------|--------|---------|--------|---|--------|--------|--------|--------|--|--|---|
| 9  | 820.49  | 410.75 |         |        | 802.48  | 401.74 | I | 741.5  | 371.25 | 724.47 | 362.74 |  |  | 6 |
| 10 | 933.58  | 467.29 |         |        | 915.57  | 458.29 | I | 628.41 | 314.71 | 611.39 | 306.2  |  |  | 5 |
| 11 | 1047.62 | 524.31 | 1030.59 | 515.8  | 1029.61 | 515.31 | N | 515.33 | 258.17 | 498.3  | 249.66 |  |  | 4 |
| 12 | 1160.7  | 580.86 | 1143.68 | 572.34 | 1142.69 | 571.85 | L | 401.29 | 201.15 | 384.26 | 192.63 |  |  | 3 |
| 13 | 1273.79 | 637.4  | 1256.76 | 628.88 | 1255.78 | 628.39 | L | 288.2  | 144.61 | 271.18 | 136.09 |  |  | 2 |
| 14 |         |        |         |        |         |        | R | 175.12 | 88.06  | 158.09 | 79.55  |  |  | 1 |

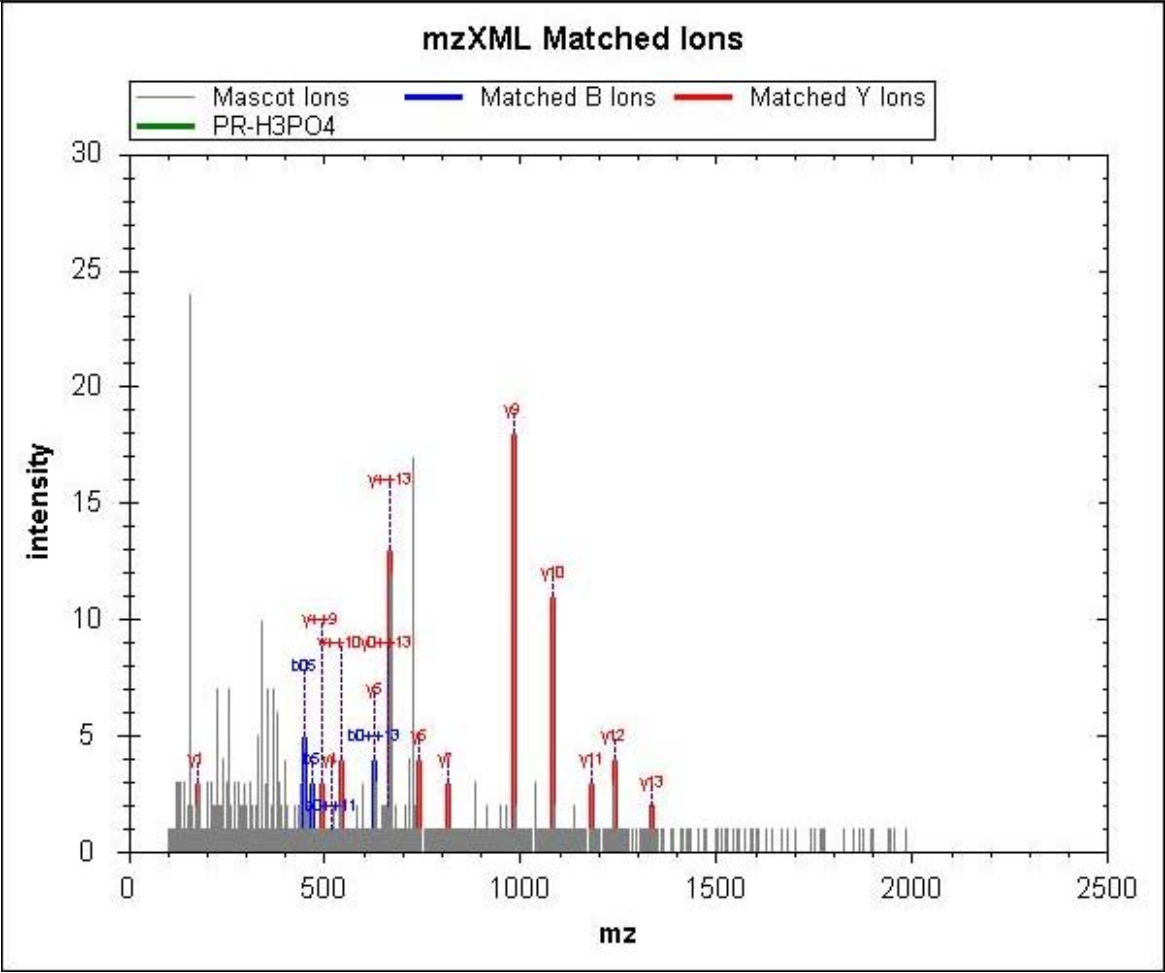

Protein index=502, ACC No:IPI00294402

Peptide index=7083 MS/MS spectrum

Sequence: NLFDNLIEFLQK, m/z:747.3616, charge:+ 2, Modification: , Mod Position:

Score: 48.75, Raw data:WET\_B2\_090616\_02.mzxml, MS/MS Elution time: 105.7355, Scan number:5972, Mass delta:0.0123, Rank:1

| No | b      | b++    | b*     | b*++   | b0     | b0++   | Seq | y       | y++    | y*      | y*++   | y0      | y0++   | RevNo |
|----|--------|--------|--------|--------|--------|--------|-----|---------|--------|---------|--------|---------|--------|-------|
| 1  | 115.05 | 58.03  | 98.02  | 49.52  |        |        | N   |         |        |         |        |         |        | 12    |
| 2  | 228.13 | 114.57 | 211.11 | 106.06 |        |        | L   | 1379.76 | 690.38 | 1362.73 | 681.87 | 1361.75 | 681.38 | 11    |
| 3  | 375.2  | 188.1  | 358.18 | 179.59 |        |        | F   | 1266.67 | 633.84 | 1249.65 | 625.33 | 1248.66 | 624.83 | 10    |
| 4  | 490.23 | 245.62 | 473.2  | 237.11 | 472.22 | 236.61 | D   | 1119.6  | 560.31 | 1102.58 | 551.79 | 1101.59 | 551.3  | 9     |
| 5  | 604.27 | 302.64 | 587.25 | 294.13 | 586.26 | 293.63 | N   | 1004.58 | 502.79 | 987.55  | 494.28 | 986.57  | 493.79 | 8     |
| 6  | 717.36 | 359.18 | 700.33 | 350.67 | 699.35 | 350.18 | L   | 890.53  | 445.77 | 873.51  | 437.26 | 872.52  | 436.77 | 7     |

|    |         |        |         |        |         |        |   |        |        |        |        |        |        |   |
|----|---------|--------|---------|--------|---------|--------|---|--------|--------|--------|--------|--------|--------|---|
| 7  | 830.44  | 415.72 | 813.41  | 407.21 | 812.43  | 406.72 | I | 777.45 | 389.23 | 760.42 | 380.72 | 759.44 | 380.22 | 6 |
| 8  | 959.48  | 480.25 | 942.46  | 471.73 | 941.47  | 471.24 | E | 664.37 | 332.69 | 647.34 | 324.17 | 646.36 | 323.68 | 5 |
| 9  | 1106.55 | 553.78 | 1089.53 | 545.27 | 1088.54 | 544.77 | F | 535.32 | 268.17 | 518.3  | 259.65 |        |        | 4 |
| 10 | 1219.64 | 610.32 | 1202.61 | 601.81 | 1201.63 | 601.32 | L | 388.26 | 194.63 | 371.23 | 186.12 |        |        | 3 |
| 11 | 1347.69 | 674.35 | 1330.67 | 665.84 | 1329.68 | 665.35 | Q | 275.17 | 138.09 | 258.14 | 129.58 |        |        | 2 |
| 12 |         |        |         |        |         |        | K | 147.11 | 74.06  | 130.09 | 65.55  |        |        | 1 |

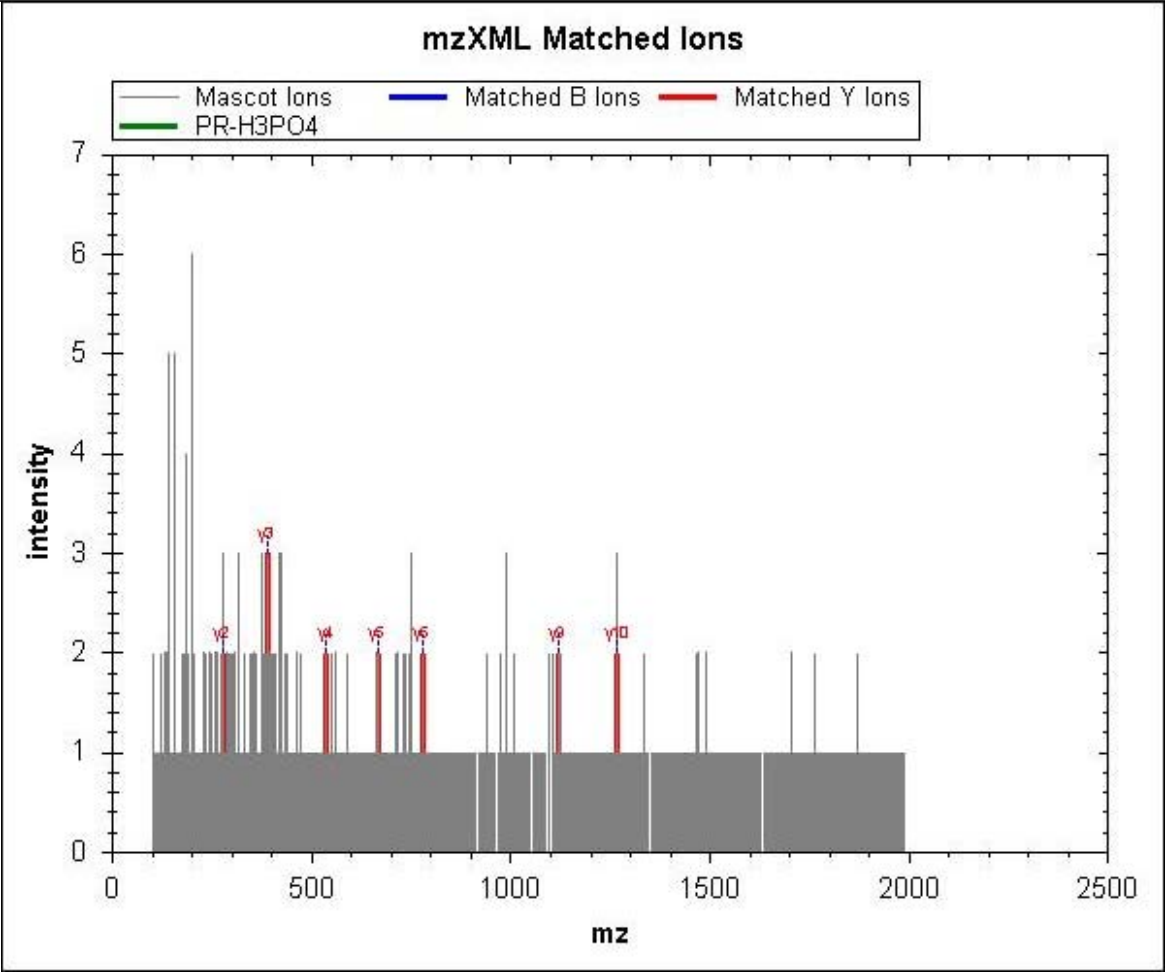

Protein index=504, ACC No:IPI00010418

Peptide index=6931 MS/MS spectrum

Sequence: MSLQLVEILQSK, m/z:751.3917, charge:+ 2, Modification: , Mod Position:

Score: 61.23, Raw data:WET\_B2\_090616\_03.mzxml, MS/MS Elution time: 100.7378, Scan number:5626, Mass delta:0.0056, Rank:1

| No | b      | b++    | b*     | b*++   | b0     | b0++   | Seq | y       | y++    | y*      | y*++   | y0      | y0++   | RevNo |
|----|--------|--------|--------|--------|--------|--------|-----|---------|--------|---------|--------|---------|--------|-------|
| 1  | 132.05 | 66.53  |        |        |        |        | M   |         |        |         |        |         |        | 13    |
| 2  | 219.08 | 110.04 |        |        | 201.07 | 101.04 | S   | 1370.83 | 685.92 | 1353.8  | 677.4  | 1352.81 | 676.91 | 12    |
| 3  | 332.16 | 166.59 |        |        | 314.15 | 157.58 | L   | 1283.79 | 642.4  | 1266.77 | 633.89 | 1265.78 | 633.4  | 11    |
| 4  | 445.25 | 223.13 |        |        | 427.24 | 214.12 | L   | 1170.71 | 585.86 | 1153.68 | 577.35 | 1152.7  | 576.85 | 10    |
| 5  | 573.31 | 287.16 | 556.28 | 278.64 | 555.3  | 278.15 | Q   | 1057.63 | 529.32 | 1040.6  | 520.8  | 1039.61 | 520.31 | 9     |
| 6  | 686.39 | 343.7  | 669.36 | 335.19 | 668.38 | 334.69 | L   | 929.57  | 465.29 | 912.54  | 456.77 | 911.56  | 456.28 | 8     |

|    |         |        |         |        |         |        |   |        |        |        |        |        |        |   |
|----|---------|--------|---------|--------|---------|--------|---|--------|--------|--------|--------|--------|--------|---|
| 7  | 785.46  | 393.23 | 768.43  | 384.72 | 767.45  | 384.23 | V | 816.48 | 408.74 | 799.46 | 400.23 | 798.47 | 399.74 | 7 |
| 8  | 914.5   | 457.75 | 897.47  | 449.24 | 896.49  | 448.75 | E | 717.41 | 359.21 | 700.39 | 350.7  | 699.4  | 350.21 | 6 |
| 9  | 1027.59 | 514.3  | 1010.56 | 505.78 | 1009.58 | 505.29 | I | 588.37 | 294.69 | 571.34 | 286.18 | 570.36 | 285.68 | 5 |
| 10 | 1140.67 | 570.84 | 1123.64 | 562.33 | 1122.66 | 561.83 | L | 475.29 | 238.15 | 458.26 | 229.63 | 457.28 | 229.14 | 4 |
| 11 | 1268.73 | 634.87 | 1251.7  | 626.35 | 1250.72 | 625.86 | Q | 362.2  | 181.61 | 345.18 | 173.09 | 344.19 | 172.6  | 3 |
| 12 | 1355.76 | 678.38 | 1338.73 | 669.87 | 1337.75 | 669.38 | S | 234.14 | 117.58 | 217.12 | 109.06 | 216.13 | 108.57 | 2 |
| 13 |         |        |         |        |         |        | K | 147.11 | 74.06  | 130.09 | 65.55  |        |        | 1 |

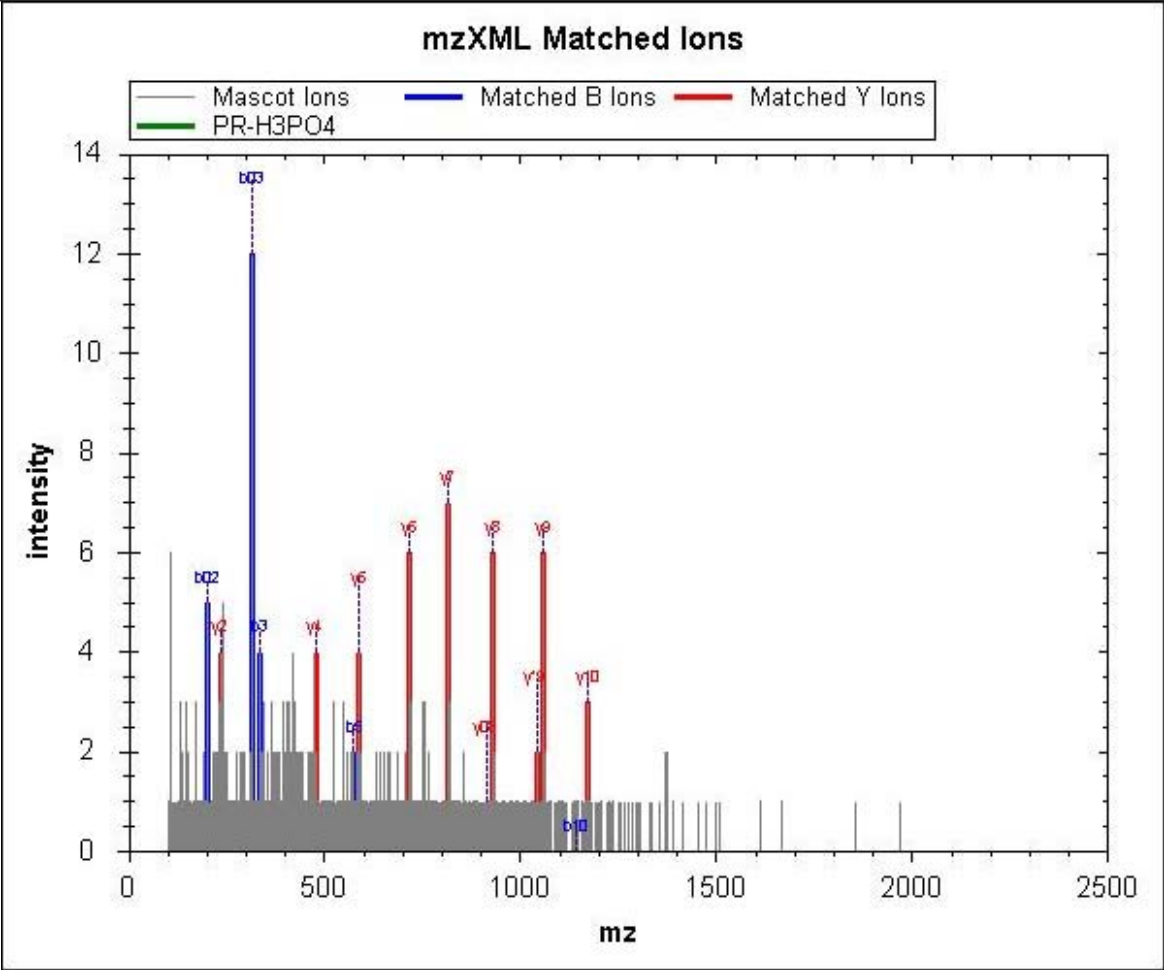

Protein index=505, ACC No:IPI00030910

Peptide index=4633 MS/MS spectrum

Sequence: TVLELQYVLDK, m/z:660.8333, charge:+ 2, Modification: , Mod Position:

Score: 64.31, Raw data:WET\_B2\_090616\_02.mzxml, MS/MS Elution time: 64.10833, Scan number:3515, Mass delta:-0.0071, Rank:1

| No | b      | b++    | b* | b*++ | b0     | b0++   | Seq | y       | y++    | y*      | y*++   | y0      | y0++   | RevNo |
|----|--------|--------|----|------|--------|--------|-----|---------|--------|---------|--------|---------|--------|-------|
| 1  | 102.05 | 51.53  |    |      | 84.04  | 42.53  | T   |         |        |         |        |         |        | 11    |
| 2  | 201.12 | 101.07 |    |      | 183.11 | 92.06  | V   | 1219.69 | 610.35 | 1202.67 | 601.84 | 1201.68 | 601.34 | 10    |
| 3  | 314.21 | 157.61 |    |      | 296.2  | 148.6  | L   | 1120.62 | 560.82 | 1103.6  | 552.3  | 1102.61 | 551.81 | 9     |
| 4  | 443.25 | 222.13 |    |      | 425.24 | 213.12 | E   | 1007.54 | 504.27 | 990.51  | 495.76 | 989.53  | 495.27 | 8     |
| 5  | 556.33 | 278.67 |    |      | 538.32 | 269.67 | L   | 878.5   | 439.75 | 861.47  | 431.24 | 860.49  | 430.75 | 7     |

|    |         |        |         |        |         |        |   |        |        |        |        |        |        |   |
|----|---------|--------|---------|--------|---------|--------|---|--------|--------|--------|--------|--------|--------|---|
| 6  | 684.39  | 342.7  | 667.37  | 334.19 | 666.38  | 333.69 | Q | 765.41 | 383.21 | 748.39 | 374.7  | 747.4  | 374.21 | 6 |
| 7  | 847.46  | 424.23 | 830.43  | 415.72 | 829.45  | 415.23 | Y | 637.36 | 319.18 | 620.33 | 310.67 | 619.34 | 310.18 | 5 |
| 8  | 946.52  | 473.77 | 929.5   | 465.25 | 928.51  | 464.76 | V | 474.29 | 237.65 | 457.27 | 229.14 | 456.28 | 228.64 | 4 |
| 9  | 1059.61 | 530.31 | 1042.58 | 521.79 | 1041.6  | 521.3  | L | 375.22 | 188.12 | 358.2  | 179.6  | 357.21 | 179.11 | 3 |
| 10 | 1174.64 | 587.82 | 1157.61 | 579.31 | 1156.62 | 578.82 | D | 262.14 | 131.57 | 245.11 | 123.06 | 244.13 | 122.57 | 2 |
| 11 |         |        |         |        |         |        | K | 147.11 | 74.06  | 130.09 | 65.55  |        |        | 1 |

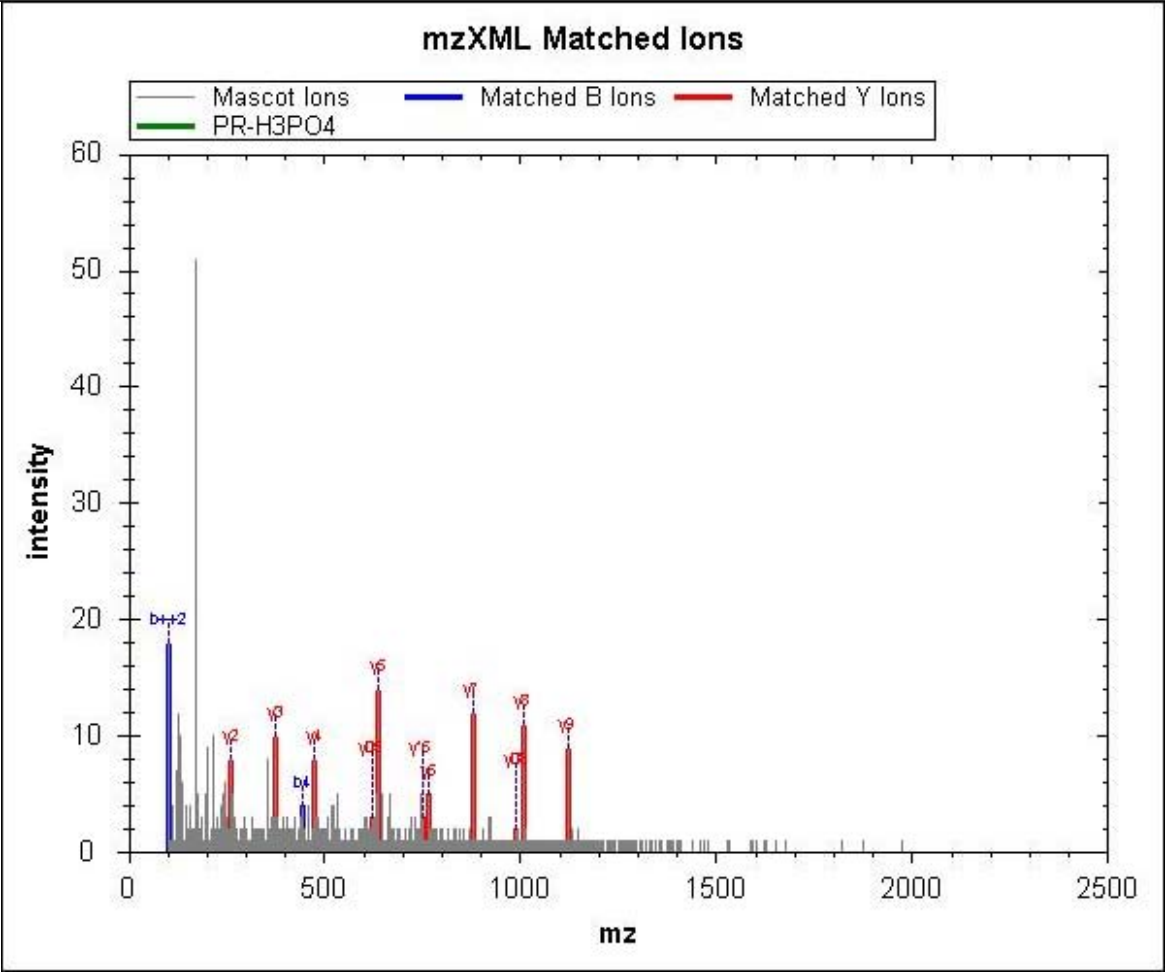

Protein index=507, ACC No:IPI00158615

Peptide index=6121 MS/MS spectrum

Sequence: LGLLEALLK, m/z:485.2851, charge:+ 2, Modification: , Mod Position:

Score: 54.79, Raw data:WET\_A2\_090616\_03.mzxml, MS/MS Elution time: 83.04567, Scan number:4588, Mass delta:-0.0713, Rank:1

| No | b      | b++    | b0     | b0++   | Seq | y      | y++    | y*     | y*++   | y0     | y0++   | RevNo |
|----|--------|--------|--------|--------|-----|--------|--------|--------|--------|--------|--------|-------|
| 1  | 114.09 | 57.55  |        |        | L   |        |        |        |        |        |        | 9     |
| 2  | 171.11 | 86.06  |        |        | G   | 856.55 | 428.78 | 839.52 | 420.27 | 838.54 | 419.77 | 8     |
| 3  | 284.2  | 142.6  |        |        | L   | 799.53 | 400.27 | 782.5  | 391.75 | 781.52 | 391.26 | 7     |
| 4  | 397.28 | 199.14 |        |        | L   | 686.44 | 343.73 | 669.42 | 335.21 | 668.43 | 334.72 | 6     |
| 5  | 526.32 | 263.67 | 508.31 | 254.66 | E   | 573.36 | 287.18 | 556.33 | 278.67 | 555.35 | 278.18 | 5     |
| 6  | 597.36 | 299.18 | 579.35 | 290.18 | A   | 444.32 | 222.66 | 427.29 | 214.15 |        |        | 4     |

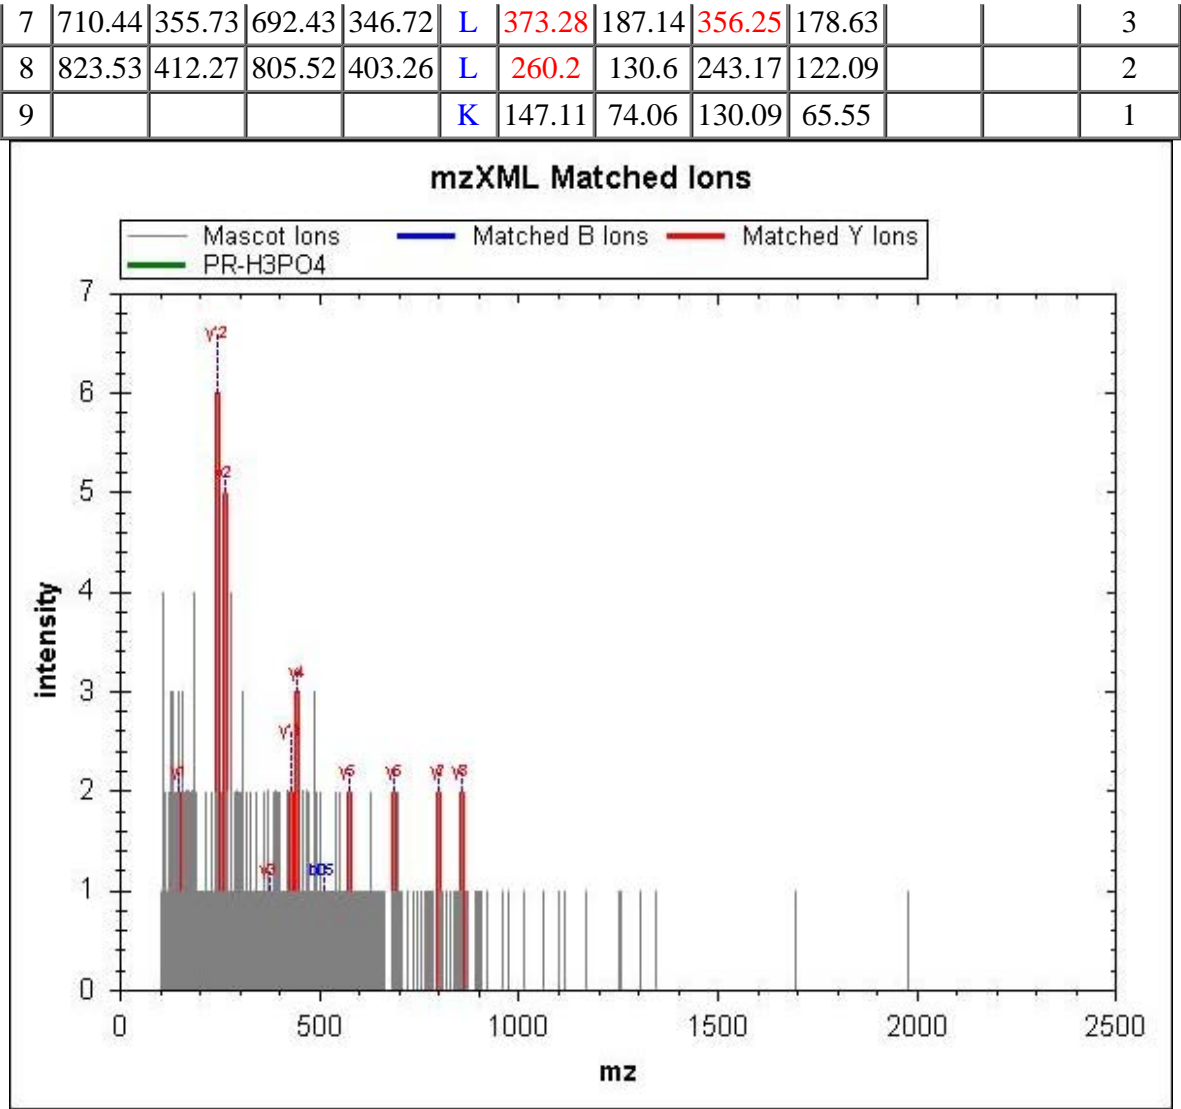

Protein index=508, ACC No:IPI00246058

Peptide index=7035 MS/MS spectrum

Sequence: NLATAYDNFVELVANLK, m/z:947.9496, charge:+ 2, Modification: , Mod Position:

Score: 73.79, Raw data:WET\_A2\_090616\_03.mzxml, MS/MS Elution time: 104.4162, Scan number:5857, Mass delta:-0.099, Rank:1

| No | b       | b++    | b*     | b*++   | b0     | b0++   | Seq | y       | y++    | y*      | y*++   | y0      | y0++   | RevNo |
|----|---------|--------|--------|--------|--------|--------|-----|---------|--------|---------|--------|---------|--------|-------|
| 1  | 115.05  | 58.03  | 98.02  | 49.52  |        |        | N   |         |        |         |        |         |        | 17    |
| 2  | 228.13  | 114.57 | 211.11 | 106.06 |        |        | L   | 1780.95 | 890.98 | 1763.92 | 882.46 | 1762.94 | 881.97 | 16    |
| 3  | 299.17  | 150.09 | 282.14 | 141.58 |        |        | A   | 1667.86 | 834.44 | 1650.84 | 825.92 | 1649.85 | 825.43 | 15    |
| 4  | 400.22  | 200.61 | 383.19 | 192.1  | 382.21 | 191.61 | T   | 1596.83 | 798.92 | 1579.8  | 790.4  | 1578.82 | 789.91 | 14    |
| 5  | 471.26  | 236.13 | 454.23 | 227.62 | 453.25 | 227.13 | A   | 1495.78 | 748.39 | 1478.75 | 739.88 | 1477.77 | 739.39 | 13    |
| 6  | 634.32  | 317.66 | 617.29 | 309.15 | 616.31 | 308.66 | Y   | 1424.74 | 712.87 | 1407.72 | 704.36 | 1406.73 | 703.87 | 12    |
| 7  | 749.35  | 375.18 | 732.32 | 366.66 | 731.34 | 366.17 | D   | 1261.68 | 631.34 | 1244.65 | 622.83 | 1243.67 | 622.34 | 11    |
| 8  | 863.39  | 432.2  | 846.36 | 423.68 | 845.38 | 423.19 | N   | 1146.65 | 573.83 | 1129.63 | 565.32 | 1128.64 | 564.82 | 10    |
| 9  | 1010.46 | 505.73 | 993.43 | 497.22 | 992.45 | 496.73 | F   | 1032.61 | 516.81 | 1015.58 | 508.29 | 1014.6  | 507.8  | 9     |

|    |         |        |         |        |         |        |   |        |        |        |        |        |        |   |
|----|---------|--------|---------|--------|---------|--------|---|--------|--------|--------|--------|--------|--------|---|
| 10 | 1109.53 | 555.27 | 1092.5  | 546.75 | 1091.52 | 546.26 | V | 885.54 | 443.27 | 868.51 | 434.76 | 867.53 | 434.27 | 8 |
| 11 | 1238.57 | 619.79 | 1221.54 | 611.27 | 1220.56 | 610.78 | E | 786.47 | 393.74 | 769.45 | 385.23 | 768.46 | 384.73 | 7 |
| 12 | 1351.65 | 676.33 | 1334.63 | 667.82 | 1333.64 | 667.32 | L | 657.43 | 329.22 | 640.4  | 320.71 |        |        | 6 |
| 13 | 1450.72 | 725.86 | 1433.69 | 717.35 | 1432.71 | 716.86 | V | 544.35 | 272.68 | 527.32 | 264.16 |        |        | 5 |
| 14 | 1521.76 | 761.38 | 1504.73 | 752.87 | 1503.75 | 752.38 | A | 445.28 | 223.14 | 428.25 | 214.63 |        |        | 4 |
| 15 | 1635.8  | 818.4  | 1618.77 | 809.89 | 1617.79 | 809.4  | N | 374.24 | 187.62 | 357.21 | 179.11 |        |        | 3 |
| 16 | 1748.89 | 874.95 | 1731.86 | 866.43 | 1730.87 | 865.94 | L | 260.2  | 130.6  | 243.17 | 122.09 |        |        | 2 |
| 17 |         |        |         |        |         |        | K | 147.11 | 74.06  | 130.09 | 65.55  |        |        | 1 |

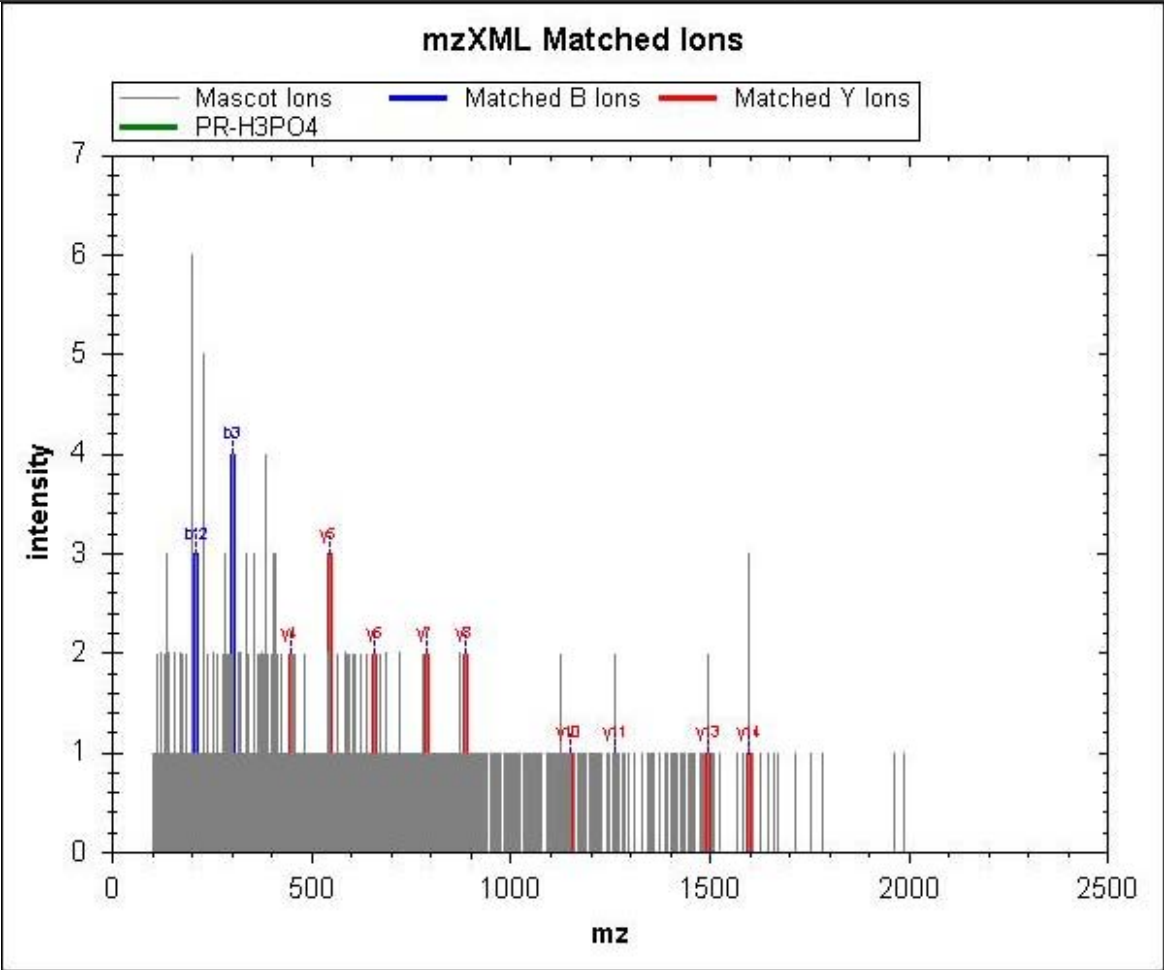

Protein index=510, ACC No:IPI00216715

Peptide index=68 MS/MS spectrum

Sequence: EQDTRALR, m/z:494.7616, charge:+ 2, Modification: , Mod Position:

Score: 38.4, Raw data:WET\_A2\_090616\_03.mzxml, MS/MS Elution time: 15.34195, Scan number:656, Mass delta:-0.0011, Rank:1

| No | b      | b++    | b*     | b*++   | b0     | b0++   | Seq | y      | y++    | y*     | y*++   | y0     | y0++   | RevNo |
|----|--------|--------|--------|--------|--------|--------|-----|--------|--------|--------|--------|--------|--------|-------|
| 1  | 130.05 | 65.53  |        |        | 112.04 | 56.52  | E   |        |        |        |        |        |        | 8     |
| 2  | 258.11 | 129.56 | 241.08 | 121.04 | 240.1  | 120.55 | Q   | 859.47 | 430.24 | 842.45 | 421.73 | 841.46 | 421.24 | 7     |
| 3  | 373.14 | 187.07 | 356.11 | 178.56 | 355.12 | 178.07 | D   | 731.42 | 366.21 | 714.39 | 357.7  | 713.41 | 357.21 | 6     |
| 4  | 474.18 | 237.6  | 457.16 | 229.08 | 456.17 | 228.59 | T   | 616.39 | 308.7  | 599.36 | 300.18 | 598.38 | 299.69 | 5     |

|   |        |        |        |        |        |        |   |        |        |        |        |  |  |   |
|---|--------|--------|--------|--------|--------|--------|---|--------|--------|--------|--------|--|--|---|
| 5 | 630.28 | 315.65 | 613.26 | 307.13 | 612.27 | 306.64 | R | 515.34 | 258.17 | 498.31 | 249.66 |  |  | 4 |
| 6 | 701.32 | 351.16 | 684.29 | 342.65 | 683.31 | 342.16 | A | 359.24 | 180.12 | 342.21 | 171.61 |  |  | 3 |
| 7 | 814.41 | 407.71 | 797.38 | 399.19 | 796.39 | 398.7  | L | 288.2  | 144.61 | 271.18 | 136.09 |  |  | 2 |
| 8 |        |        |        |        |        |        | R | 175.12 | 88.06  | 158.09 | 79.55  |  |  | 1 |

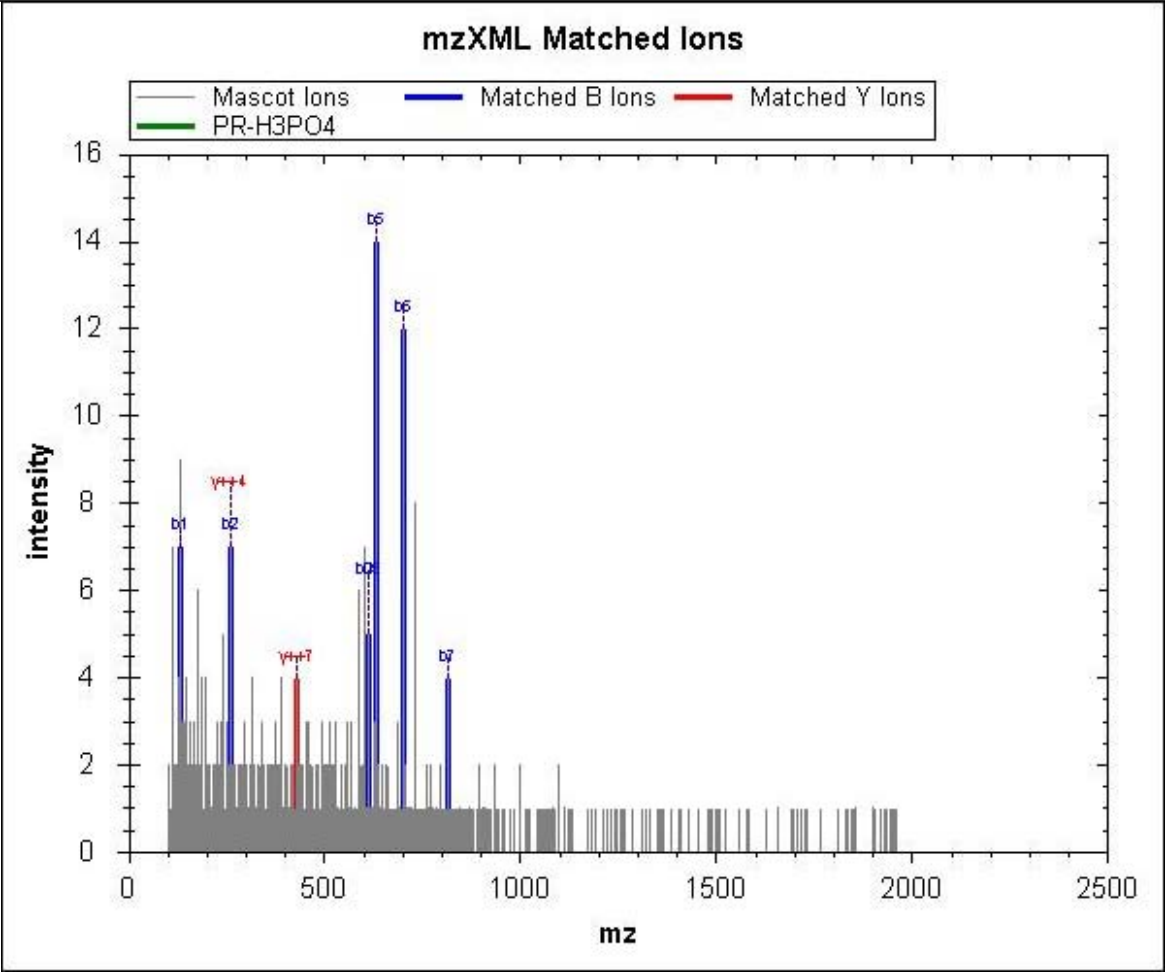

Protein index=512, ACC No: IPI00026156

Peptide index=773 MS/MS spectrum

Sequence: TEHINIHLQR, m/z:420.8657, charge:+ 3, Modification: , Mod Position:

Score: 47.82, Raw data:WET\_A2\_090616\_03.mzxml, MS/MS Elution time: 24.37133, Scan number:1180, Mass delta:-0.0983, Rank:1

| No | b      | b++    | b*     | b*++   | b0     | b0++   | Seq | y       | y++    | y*      | y*++   | y0      | y0++   | RevNo |
|----|--------|--------|--------|--------|--------|--------|-----|---------|--------|---------|--------|---------|--------|-------|
| 1  | 102.05 | 51.53  |        |        | 84.04  | 42.53  | T   |         |        |         |        |         |        | 10    |
| 2  | 231.1  | 116.05 |        |        | 213.09 | 107.05 | E   | 1159.63 | 580.32 | 1142.61 | 571.81 | 1141.62 | 571.31 | 9     |
| 3  | 368.16 | 184.58 |        |        | 350.15 | 175.58 | H   | 1030.59 | 515.8  | 1013.56 | 507.29 |         |        | 8     |
| 4  | 481.24 | 241.12 |        |        | 463.23 | 232.12 | I   | 893.53  | 447.27 | 876.5   | 438.76 |         |        | 7     |
| 5  | 595.28 | 298.15 | 578.26 | 289.63 | 577.27 | 289.14 | N   | 780.45  | 390.73 | 763.42  | 382.21 |         |        | 6     |
| 6  | 708.37 | 354.69 | 691.34 | 346.17 | 690.36 | 345.68 | I   | 666.4   | 333.71 | 649.38  | 325.19 |         |        | 5     |
| 7  | 845.43 | 423.22 | 828.4  | 414.7  | 827.42 | 414.21 | H   | 553.32  | 277.16 | 536.29  | 268.65 |         |        | 4     |
| 8  | 973.48 | 487.25 | 956.46 | 478.73 | 955.47 | 478.24 | Q   | 416.26  | 208.63 | 399.24  | 200.12 |         |        | 3     |

|    |         |        |         |        |         |        |   |        |        |        |        |  |  |   |
|----|---------|--------|---------|--------|---------|--------|---|--------|--------|--------|--------|--|--|---|
| 9  | 1086.57 | 543.79 | 1069.54 | 535.27 | 1068.56 | 534.78 | L | 288.2  | 144.61 | 271.18 | 136.09 |  |  | 2 |
| 10 |         |        |         |        |         |        | R | 175.12 | 88.06  | 158.09 | 79.55  |  |  | 1 |

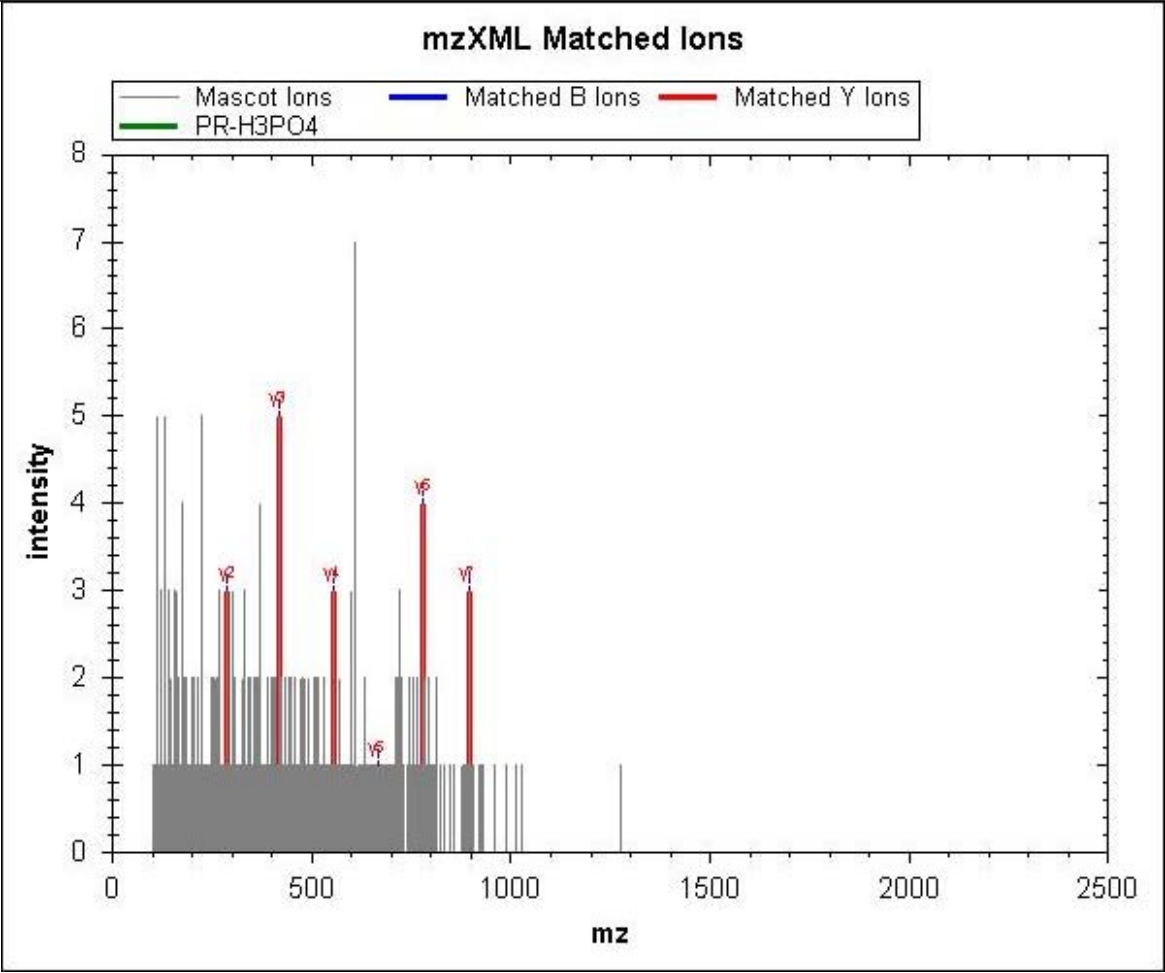

Protein index=531, ACC No:IPI00031357

Peptide index=6562 MS/MS spectrum

Sequence: SILLGLLLGAGR, m/z:591.8803, charge:+ 2, Modification: , Mod Position:

Score: 49.18, Raw data:WET\_A3\_090615\_02.mzxml, MS/MS Elution time: 90.97583, Scan number:5061, Mass delta:-0.0062, Rank:1

| No | b      | b++    | b0     | b0++   | Seq | y       | y++    | y*     | y*++   | RevNo |
|----|--------|--------|--------|--------|-----|---------|--------|--------|--------|-------|
| 1  | 88.04  | 44.52  | 70.03  | 35.52  | S   |         |        |        |        | 12    |
| 2  | 201.12 | 101.07 | 183.11 | 92.06  | I   | 1095.72 | 548.37 | 1078.7 | 539.85 | 11    |
| 3  | 314.21 | 157.61 | 296.2  | 148.6  | L   | 982.64  | 491.82 | 965.61 | 483.31 | 10    |
| 4  | 427.29 | 214.15 | 409.28 | 205.14 | L   | 869.56  | 435.28 | 852.53 | 426.77 | 9     |
| 5  | 484.31 | 242.66 | 466.3  | 233.65 | G   | 756.47  | 378.74 | 739.45 | 370.23 | 8     |
| 6  | 597.4  | 299.2  | 579.39 | 290.2  | L   | 699.45  | 350.23 | 682.42 | 341.72 | 7     |
| 7  | 710.48 | 355.74 | 692.47 | 346.74 | L   | 586.37  | 293.69 | 569.34 | 285.17 | 6     |
| 8  | 823.57 | 412.29 | 805.55 | 403.28 | L   | 473.28  | 237.15 | 456.26 | 228.63 | 5     |
| 9  | 880.59 | 440.8  | 862.58 | 431.79 | G   | 360.2   | 180.6  | 343.17 | 172.09 | 4     |
| 10 | 951.62 | 476.32 | 933.61 | 467.31 | A   | 303.18  | 152.09 | 286.15 | 143.58 | 3     |

|    |         |        |        |        |   |        |        |        |        |   |
|----|---------|--------|--------|--------|---|--------|--------|--------|--------|---|
| 11 | 1008.65 | 504.83 | 990.63 | 495.82 | G | 232.14 | 116.57 | 215.11 | 108.06 | 2 |
| 12 |         |        |        |        | R | 175.12 | 88.06  | 158.09 | 79.55  | 1 |

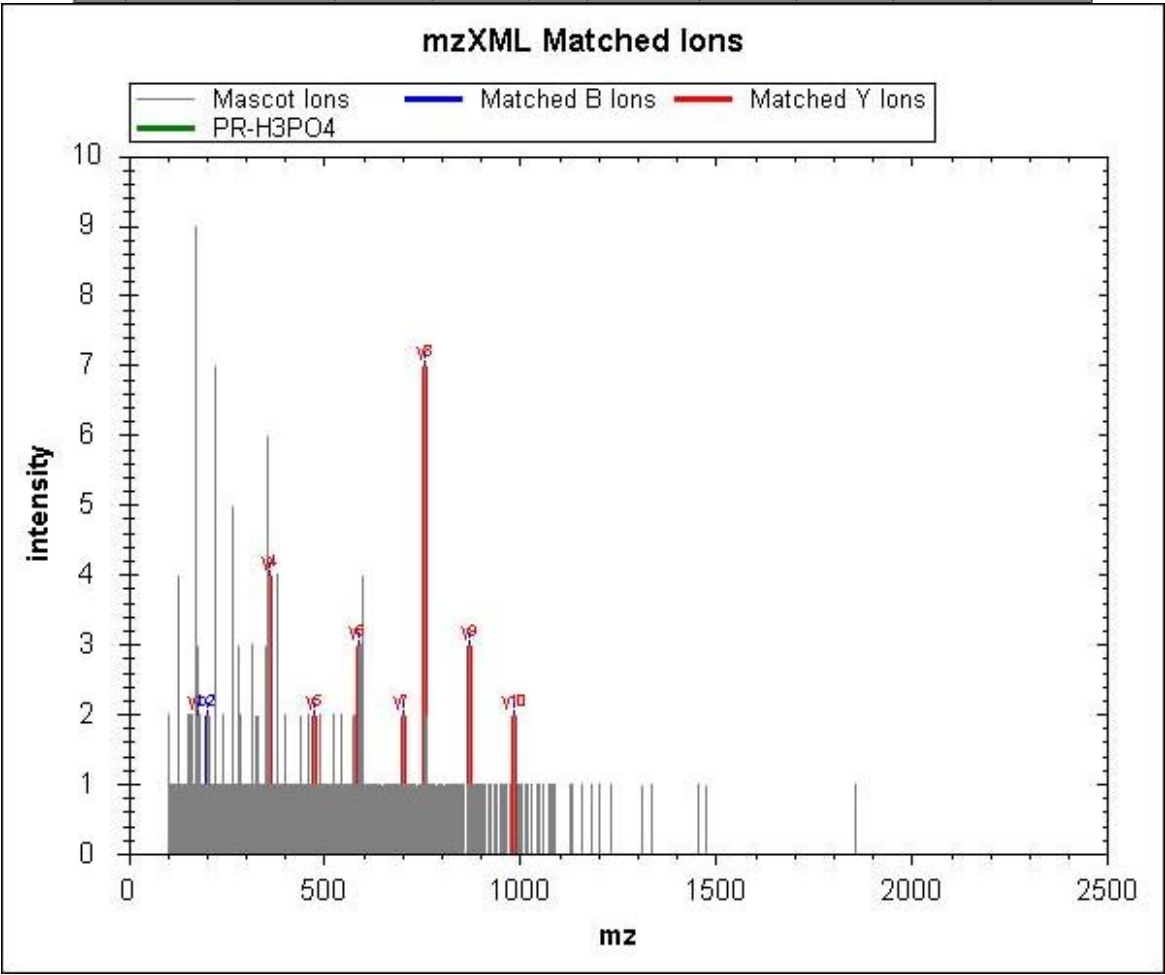

Protein index=540, ACC No:IPI00033486

Peptide index=6415 MS/MS spectrum

Sequence: TSNQWLDFWLR, m/z:733.3714, charge:+ 2, Modification: , Mod Position:

Score: 33.89, Raw data:WET\_A3\_090615\_01.mzxml, MS/MS Elution time: 87.8535, Scan number:4904, Mass delta:0.0133, Rank:1

| No | b       | b++    | b*      | b*++   | b0      | b0++   | Seq | y       | y++    | y*      | y*++   | y0      | y0++   | RevNo |
|----|---------|--------|---------|--------|---------|--------|-----|---------|--------|---------|--------|---------|--------|-------|
| 1  | 102.05  | 51.53  |         |        | 84.04   | 42.53  | T   |         |        |         |        |         |        | 11    |
| 2  | 189.09  | 95.05  |         |        | 171.08  | 86.04  | S   | 1364.67 | 682.84 | 1347.65 | 674.33 | 1346.66 | 673.84 | 10    |
| 3  | 303.13  | 152.07 | 286.1   | 143.56 | 285.12  | 143.06 | N   | 1277.64 | 639.32 | 1260.62 | 630.81 | 1259.63 | 630.32 | 9     |
| 4  | 431.19  | 216.1  | 414.16  | 207.58 | 413.18  | 207.09 | Q   | 1163.6  | 582.3  | 1146.57 | 573.79 | 1145.59 | 573.3  | 8     |
| 5  | 617.27  | 309.14 | 600.24  | 300.62 | 599.26  | 300.13 | W   | 1035.54 | 518.27 | 1018.51 | 509.76 | 1017.53 | 509.27 | 7     |
| 6  | 730.35  | 365.68 | 713.33  | 357.17 | 712.34  | 356.67 | L   | 849.46  | 425.23 | 832.44  | 416.72 | 831.45  | 416.23 | 6     |
| 7  | 845.38  | 423.19 | 828.35  | 414.68 | 827.37  | 414.19 | D   | 736.38  | 368.69 | 719.35  | 360.18 | 718.37  | 359.69 | 5     |
| 8  | 992.45  | 496.73 | 975.42  | 488.21 | 974.44  | 487.72 | F   | 621.35  | 311.18 | 604.32  | 302.67 |         |        | 4     |
| 9  | 1178.53 | 589.77 | 1161.5  | 581.25 | 1160.52 | 580.76 | W   | 474.28  | 237.64 | 457.26  | 229.13 |         |        | 3     |
| 10 | 1291.61 | 646.31 | 1274.58 | 637.8  | 1273.6  | 637.3  | L   | 288.2   | 144.61 | 271.18  | 136.09 |         |        | 2     |

|    |  |  |  |  |   |        |       |        |       |  |  |   |
|----|--|--|--|--|---|--------|-------|--------|-------|--|--|---|
| 11 |  |  |  |  | R | 175.12 | 88.06 | 158.09 | 79.55 |  |  | 1 |
|----|--|--|--|--|---|--------|-------|--------|-------|--|--|---|

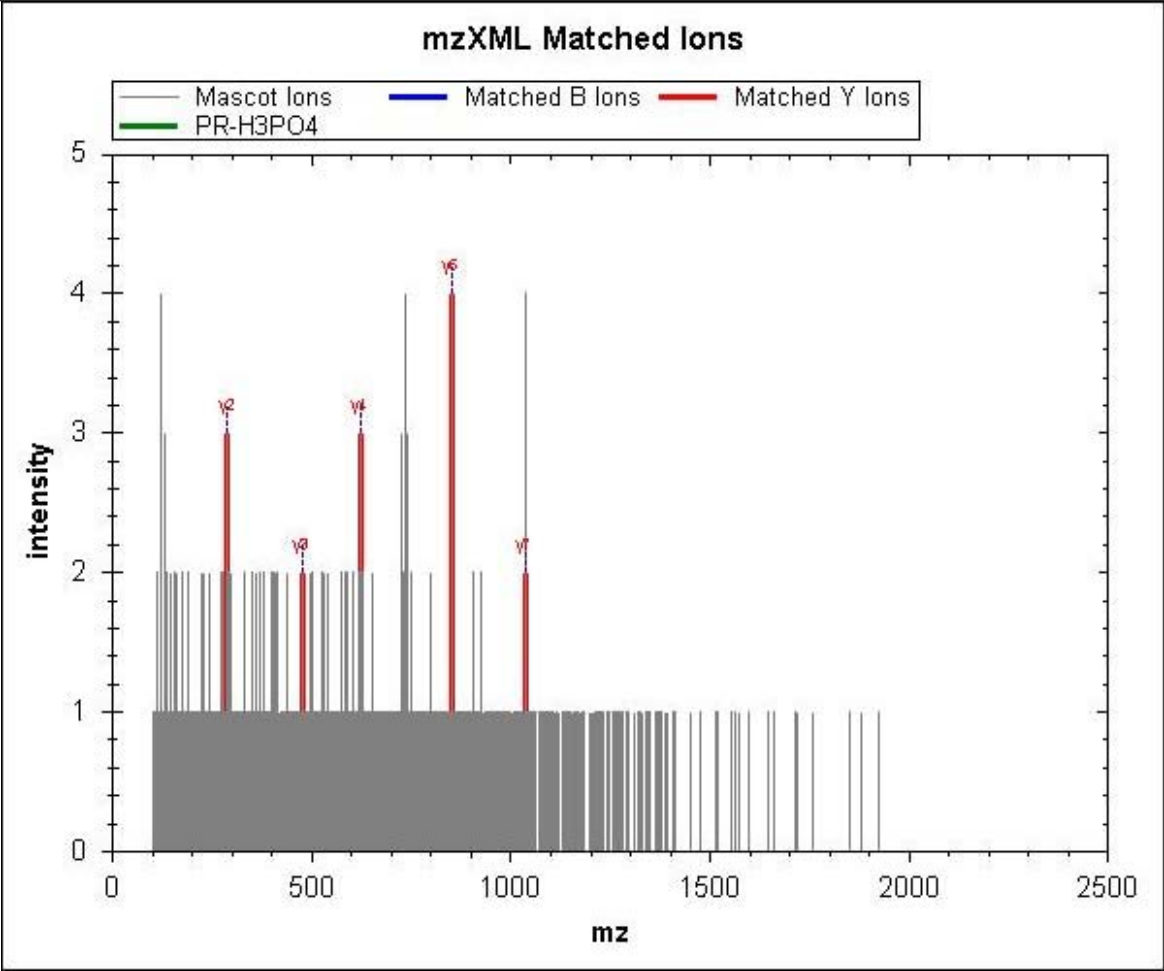

Protein index=567, ACC No:IPI00007327

Peptide index=1445 MS/MS spectrum

Sequence: RPGALLLR, m/z:448.293, charge:+ 2, Modification: , Mod Position:

Score: 46.64, Raw data:WET\_B3\_090616\_01.mzxml, MS/MS Elution time: 33.50267, Scan number:1712, Mass delta:-0.0041, Rank:1

| No | b      | b++    | b*     | b*++   | Seq | y      | y++    | y*     | y*++   | RevNo |
|----|--------|--------|--------|--------|-----|--------|--------|--------|--------|-------|
| 1  | 157.11 | 79.06  | 140.08 | 70.54  | R   |        |        |        |        | 8     |
| 2  | 254.16 | 127.58 | 237.13 | 119.07 | P   | 739.48 | 370.24 | 722.46 | 361.73 | 7     |
| 3  | 311.18 | 156.09 | 294.16 | 147.58 | G   | 642.43 | 321.72 | 625.4  | 313.21 | 6     |
| 4  | 382.22 | 191.61 | 365.19 | 183.1  | A   | 585.41 | 293.21 | 568.38 | 284.69 | 5     |
| 5  | 495.3  | 248.16 | 478.28 | 239.64 | L   | 514.37 | 257.69 | 497.34 | 249.18 | 4     |
| 6  | 608.39 | 304.7  | 591.36 | 296.18 | L   | 401.29 | 201.15 | 384.26 | 192.63 | 3     |
| 7  | 721.47 | 361.24 | 704.45 | 352.73 | L   | 288.2  | 144.61 | 271.18 | 136.09 | 2     |
| 8  |        |        |        |        | R   | 175.12 | 88.06  | 158.09 | 79.55  | 1     |

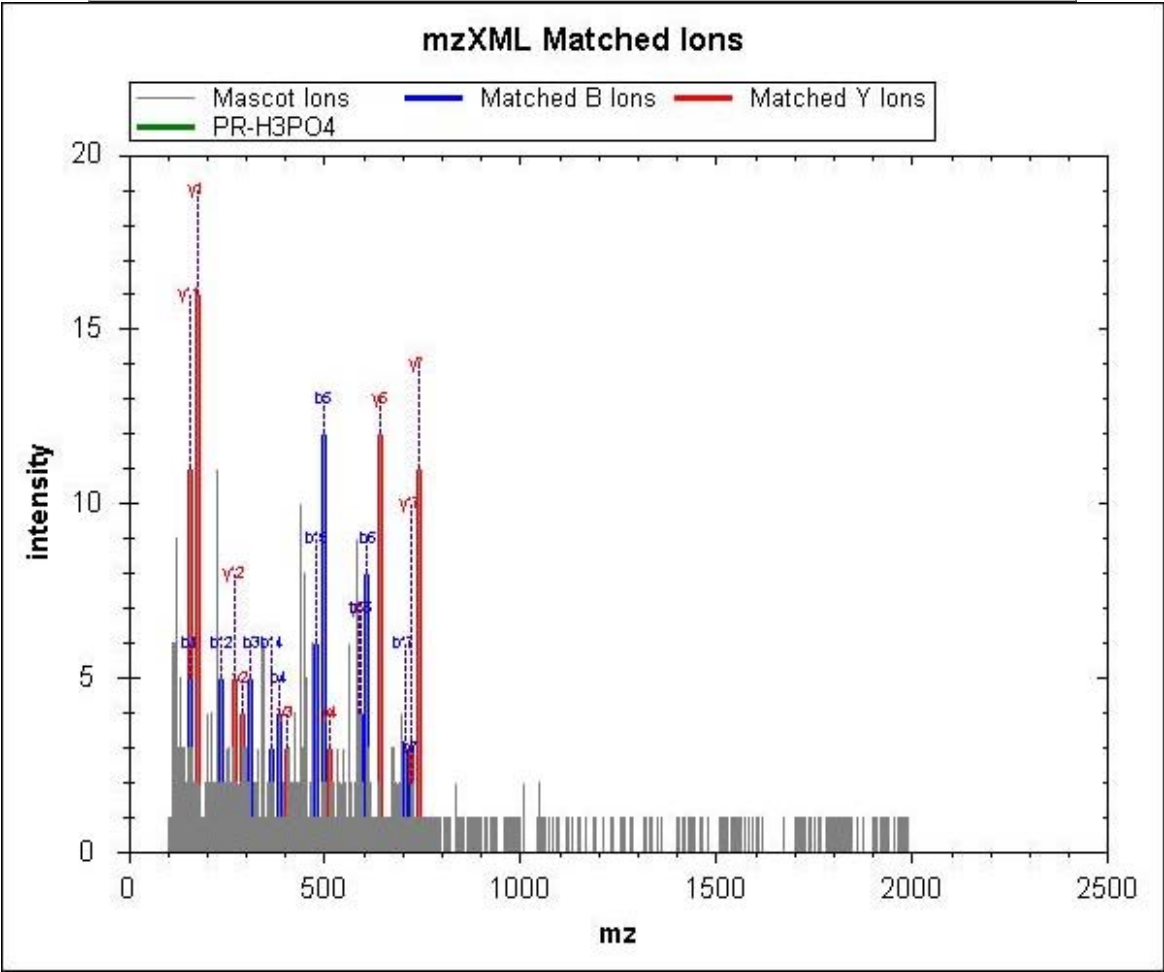

Protein index=575, ACC No:IPI00031107

Peptide index=5697 MS/MS spectrum

Sequence: LLGTIYTAAEEIEAVGGK, m/z:917.9895, charge:+ 2, Modification: , Mod Position:

Score: 104.23, Raw data:WET\_B3\_090616\_03.mzxml, MS/MS Elution time: 76.90183, Scan number:4257, Mass delta:-0.0054, Rank:1

| No | b       | b++    | b0      | b0++   | Seq | y       | y++    | y*      | y*++   | y0      | y0++   | RevNo |
|----|---------|--------|---------|--------|-----|---------|--------|---------|--------|---------|--------|-------|
| 1  | 114.09  | 57.55  |         |        | L   |         |        |         |        |         |        | 18    |
| 2  | 227.18  | 114.09 |         |        | L   | 1721.9  | 861.45 | 1704.87 | 852.94 | 1703.89 | 852.45 | 17    |
| 3  | 284.2   | 142.6  |         |        | G   | 1608.81 | 804.91 | 1591.79 | 796.4  | 1590.8  | 795.9  | 16    |
| 4  | 385.24  | 193.13 | 367.23  | 184.12 | T   | 1551.79 | 776.4  | 1534.76 | 767.89 | 1533.78 | 767.39 | 15    |
| 5  | 498.33  | 249.67 | 480.32  | 240.66 | I   | 1450.74 | 725.87 | 1433.72 | 717.36 | 1432.73 | 716.87 | 14    |
| 6  | 661.39  | 331.2  | 643.38  | 322.19 | Y   | 1337.66 | 669.33 | 1320.63 | 660.82 | 1319.65 | 660.33 | 13    |
| 7  | 762.44  | 381.72 | 744.43  | 372.72 | T   | 1174.6  | 587.8  | 1157.57 | 579.29 | 1156.58 | 578.8  | 12    |
| 8  | 833.48  | 417.24 | 815.47  | 408.24 | A   | 1073.55 | 537.28 | 1056.52 | 528.76 | 1055.54 | 528.27 | 11    |
| 9  | 904.51  | 452.76 | 886.5   | 443.76 | A   | 1002.51 | 501.76 | 985.48  | 493.25 | 984.5   | 492.75 | 10    |
| 10 | 1033.56 | 517.28 | 1015.55 | 508.28 | E   | 931.47  | 466.24 | 914.45  | 457.73 | 913.46  | 457.23 | 9     |
| 11 | 1162.6  | 581.8  | 1144.59 | 572.8  | E   | 802.43  | 401.72 | 785.4   | 393.21 | 784.42  | 392.71 | 8     |
| 12 | 1275.68 | 638.35 | 1257.67 | 629.34 | I   | 673.39  | 337.2  | 656.36  | 328.68 | 655.38  | 328.19 | 7     |



|    |         |        |         |        |         |        |   |        |        |        |        |        |        |   |
|----|---------|--------|---------|--------|---------|--------|---|--------|--------|--------|--------|--------|--------|---|
| 7  | 820.42  | 410.71 | 803.39  | 402.2  | 802.41  | 401.71 | Q | 560.28 | 280.64 | 543.25 | 272.13 | 542.27 | 271.64 | 4 |
| 8  | 949.46  | 475.23 | 932.44  | 466.72 | 931.45  | 466.23 | E | 432.22 | 216.61 | 415.19 | 208.1  | 414.21 | 207.61 | 3 |
| 9  | 1077.52 | 539.26 | 1060.49 | 530.75 | 1059.51 | 530.26 | Q | 303.18 | 152.09 | 286.15 | 143.58 |        |        | 2 |
| 10 |         |        |         |        |         |        | R | 175.12 | 88.06  | 158.09 | 79.55  |        |        | 1 |

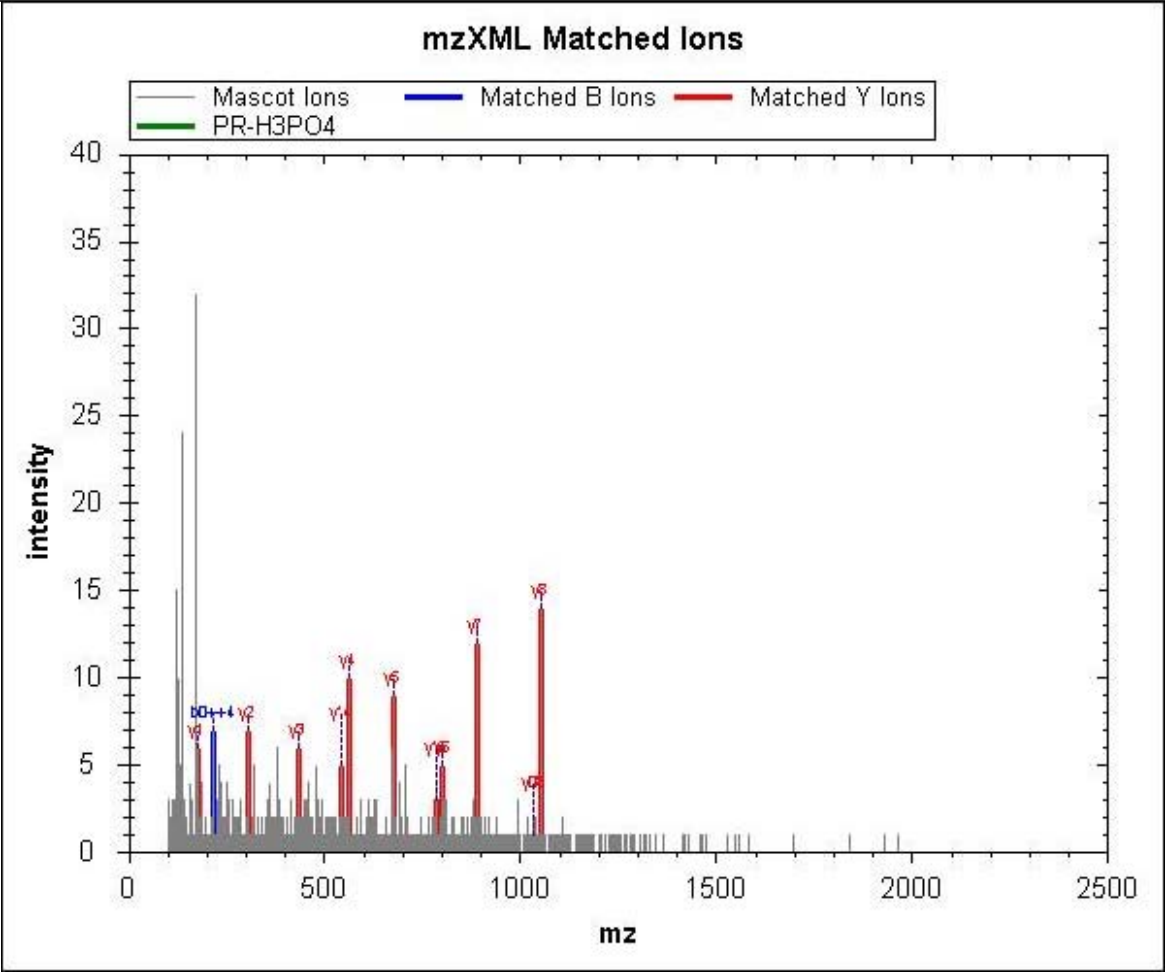

Protein index=605, ACC No:IPI00021435

Peptide index=6385 MS/MS spectrum

Sequence: TMLELINQLDGFDP, m/z:881.4515, charge:+ 2, Modification: , Mod Position:

Score: 56.1, Raw data:WET\_B3\_090616\_02.mzxml, MS/MS Elution time: 87.37317, Scan number:4875, Mass delta:0.0031, Rank:1

| No | b      | b++    | b*     | b*++   | b0     | b0++   | Seq | y       | y++    | y*      | y*++   | y0      | y0++   | RevNo |
|----|--------|--------|--------|--------|--------|--------|-----|---------|--------|---------|--------|---------|--------|-------|
| 1  | 102.05 | 51.53  |        |        | 84.04  | 42.53  | T   |         |        |         |        |         |        | 15    |
| 2  | 233.1  | 117.05 |        |        | 215.08 | 108.05 | M   | 1660.84 | 830.92 | 1643.81 | 822.41 | 1642.83 | 821.92 | 14    |
| 3  | 346.18 | 173.59 |        |        | 328.17 | 164.59 | L   | 1529.8  | 765.4  | 1512.77 | 756.89 | 1511.79 | 756.4  | 13    |
| 4  | 475.22 | 238.11 |        |        | 457.21 | 229.11 | E   | 1416.71 | 708.86 | 1399.69 | 700.35 | 1398.7  | 699.85 | 12    |
| 5  | 588.31 | 294.66 |        |        | 570.3  | 285.65 | L   | 1287.67 | 644.34 | 1270.64 | 635.83 | 1269.66 | 635.33 | 11    |
| 6  | 701.39 | 351.2  |        |        | 683.38 | 342.19 | I   | 1174.59 | 587.8  | 1157.56 | 579.28 | 1156.57 | 578.79 | 10    |
| 7  | 815.43 | 408.22 | 798.41 | 399.71 | 797.42 | 399.21 | N   | 1061.5  | 531.25 | 1044.47 | 522.74 | 1043.49 | 522.25 | 9     |
| 8  | 943.49 | 472.25 | 926.47 | 463.74 | 925.48 | 463.24 | Q   | 947.46  | 474.23 | 930.43  | 465.72 | 929.45  | 465.23 | 8     |

|    |         |        |         |        |         |        |   |        |        |        |        |        |        |   |
|----|---------|--------|---------|--------|---------|--------|---|--------|--------|--------|--------|--------|--------|---|
| 9  | 1056.58 | 528.79 | 1039.55 | 520.28 | 1038.57 | 519.79 | L | 819.4  | 410.2  | 802.37 | 401.69 | 801.39 | 401.2  | 7 |
| 10 | 1171.6  | 586.31 | 1154.58 | 577.79 | 1153.59 | 577.3  | D | 706.32 | 353.66 | 689.29 | 345.15 | 688.3  | 344.66 | 6 |
| 11 | 1228.62 | 614.82 | 1211.6  | 606.3  | 1210.61 | 605.81 | G | 591.29 | 296.15 | 574.26 | 287.63 | 573.28 | 287.14 | 5 |
| 12 | 1375.69 | 688.35 | 1358.67 | 679.84 | 1357.68 | 679.34 | F | 534.27 | 267.64 | 517.24 | 259.12 | 516.26 | 258.63 | 4 |
| 13 | 1490.72 | 745.86 | 1473.69 | 737.35 | 1472.71 | 736.86 | D | 387.2  | 194.1  | 370.17 | 185.59 | 369.19 | 185.1  | 3 |
| 14 | 1587.77 | 794.39 | 1570.75 | 785.88 | 1569.76 | 785.38 | P | 272.17 | 136.59 | 255.15 | 128.08 |        |        | 2 |
| 15 |         |        |         |        |         |        | R | 175.12 | 88.06  | 158.09 | 79.55  |        |        | 1 |

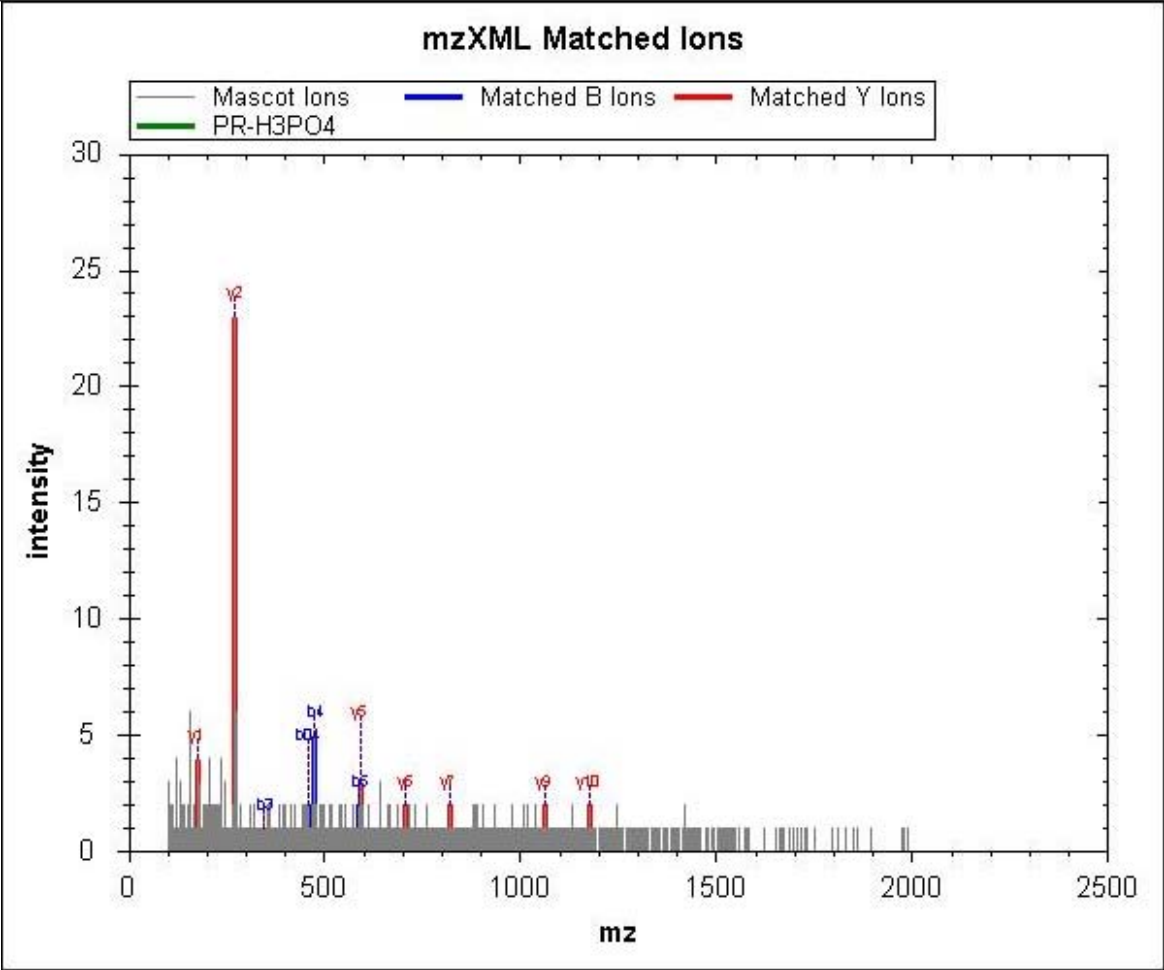

Protein index=607, ACC No:IPI00295240

Peptide index=1322 MS/MS spectrum

Sequence: AIGTDEDLAHSSIR, m/z:495.5782, charge:+ 3, Modification: , Mod Position:

Score: 77.11, Raw data:WET\_A3\_090615\_02.mzxml, MS/MS Elution time: 31.86383, Scan number:1628, Mass delta:-0.0178, Rank:1

| No | b      | b++    | b0     | b0++   | Seq | y       | y++    | y*      | y*++   | y0      | y0++   | RevNo |
|----|--------|--------|--------|--------|-----|---------|--------|---------|--------|---------|--------|-------|
| 1  | 72.04  | 36.53  |        |        | A   |         |        |         |        |         |        | 14    |
| 2  | 185.13 | 93.07  |        |        | I   | 1413.7  | 707.35 | 1396.67 | 698.84 | 1395.69 | 698.35 | 13    |
| 3  | 242.15 | 121.58 |        |        | G   | 1300.61 | 650.81 | 1283.59 | 642.3  | 1282.6  | 641.8  | 12    |
| 4  | 343.2  | 172.1  | 325.19 | 163.1  | T   | 1243.59 | 622.3  | 1226.56 | 613.79 | 1225.58 | 613.29 | 11    |
| 5  | 458.22 | 229.62 | 440.21 | 220.61 | D   | 1142.54 | 571.78 | 1125.52 | 563.26 | 1124.53 | 562.77 | 10    |

|    |         |        |         |        |   |         |        |         |        |         |        |   |
|----|---------|--------|---------|--------|---|---------|--------|---------|--------|---------|--------|---|
| 6  | 587.27  | 294.14 | 569.26  | 285.13 | E | 1027.52 | 514.26 | 1010.49 | 505.75 | 1009.51 | 505.26 | 9 |
| 7  | 702.29  | 351.65 | 684.28  | 342.65 | D | 898.47  | 449.74 | 881.45  | 441.23 | 880.46  | 440.74 | 8 |
| 8  | 815.38  | 408.19 | 797.37  | 399.19 | L | 783.45  | 392.23 | 766.42  | 383.71 | 765.44  | 383.22 | 7 |
| 9  | 886.42  | 443.71 | 868.4   | 434.71 | A | 670.36  | 335.69 | 653.34  | 327.17 | 652.35  | 326.68 | 6 |
| 10 | 1023.47 | 512.24 | 1005.46 | 503.24 | H | 599.33  | 300.17 | 582.3   | 291.65 | 581.32  | 291.16 | 5 |
| 11 | 1110.51 | 555.76 | 1092.5  | 546.75 | S | 462.27  | 231.64 | 445.24  | 223.12 | 444.26  | 222.63 | 4 |
| 12 | 1197.54 | 599.27 | 1179.53 | 590.27 | S | 375.24  | 188.12 | 358.21  | 179.61 | 357.22  | 179.12 | 3 |
| 13 | 1310.62 | 655.81 | 1292.61 | 646.81 | I | 288.2   | 144.61 | 271.18  | 136.09 |         |        | 2 |
| 14 |         |        |         |        | R | 175.12  | 88.06  | 158.09  | 79.55  |         |        | 1 |

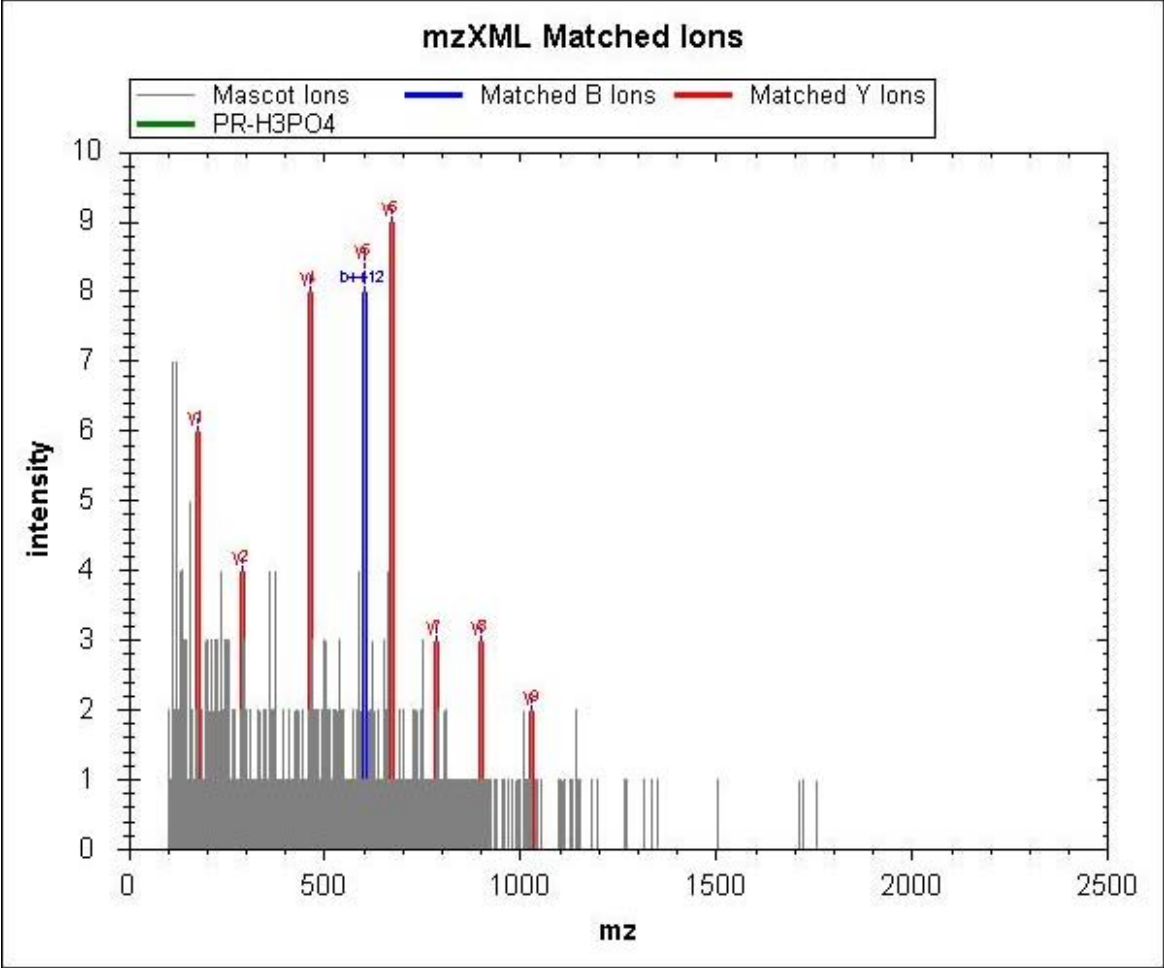

Protein index=610, ACC No:IPI00332428

Peptide index=5266 MS/MS spectrum

Sequence: ALEQIDENLIYWPR, m/z:880.4526, charge:+ 2, Modification: , Mod Position:

Score: 88.95, Raw data:WET\_A3\_090615\_03.mzxml, MS/MS Elution time: 71.17834, Scan number:3925, Mass delta:0.0103, Rank:1

| No | b      | b++    | b* | b*++ | b0     | b0++   | Seq | y       | y++    | y*      | y*++   | y0      | y0++   | RevNo |
|----|--------|--------|----|------|--------|--------|-----|---------|--------|---------|--------|---------|--------|-------|
| 1  | 72.04  | 36.53  |    |      |        |        | A   |         |        |         |        |         |        | 14    |
| 2  | 185.13 | 93.07  |    |      |        |        | L   | 1688.86 | 844.94 | 1671.84 | 836.42 | 1670.85 | 835.93 | 13    |
| 3  | 314.17 | 157.59 |    |      | 296.16 | 148.58 | E   | 1575.78 | 788.39 | 1558.75 | 779.88 | 1557.77 | 779.39 | 12    |

|    |         |        |         |        |         |        |   |         |        |         |        |         |        |    |
|----|---------|--------|---------|--------|---------|--------|---|---------|--------|---------|--------|---------|--------|----|
| 4  | 442.23  | 221.62 | 425.2   | 213.11 | 424.22  | 212.61 | Q | 1446.74 | 723.87 | 1429.71 | 715.36 | 1428.73 | 714.87 | 11 |
| 5  | 555.31  | 278.16 | 538.29  | 269.65 | 537.3   | 269.16 | I | 1318.68 | 659.84 | 1301.65 | 651.33 | 1300.67 | 650.84 | 10 |
| 6  | 670.34  | 335.67 | 653.31  | 327.16 | 652.33  | 326.67 | D | 1205.59 | 603.3  | 1188.57 | 594.79 | 1187.58 | 594.3  | 9  |
| 7  | 799.38  | 400.2  | 782.36  | 391.68 | 781.37  | 391.19 | E | 1090.57 | 545.79 | 1073.54 | 537.27 | 1072.56 | 536.78 | 8  |
| 8  | 913.43  | 457.22 | 896.4   | 448.7  | 895.42  | 448.21 | N | 961.53  | 481.27 | 944.5   | 472.75 |         |        | 7  |
| 9  | 1026.51 | 513.76 | 1009.48 | 505.25 | 1008.5  | 504.75 | L | 847.48  | 424.24 | 830.46  | 415.73 |         |        | 6  |
| 10 | 1139.59 | 570.3  | 1122.57 | 561.79 | 1121.58 | 561.3  | I | 734.4   | 367.7  | 717.37  | 359.19 |         |        | 5  |
| 11 | 1302.66 | 651.83 | 1285.63 | 643.32 | 1284.65 | 642.83 | Y | 621.31  | 311.16 | 604.29  | 302.65 |         |        | 4  |
| 12 | 1488.74 | 744.87 | 1471.71 | 736.36 | 1470.73 | 735.87 | W | 458.25  | 229.63 | 441.22  | 221.12 |         |        | 3  |
| 13 | 1585.79 | 793.4  | 1568.76 | 784.89 | 1567.78 | 784.39 | P | 272.17  | 136.59 | 255.15  | 128.08 |         |        | 2  |
| 14 |         |        |         |        |         |        | R | 175.12  | 88.06  | 158.09  | 79.55  |         |        | 1  |

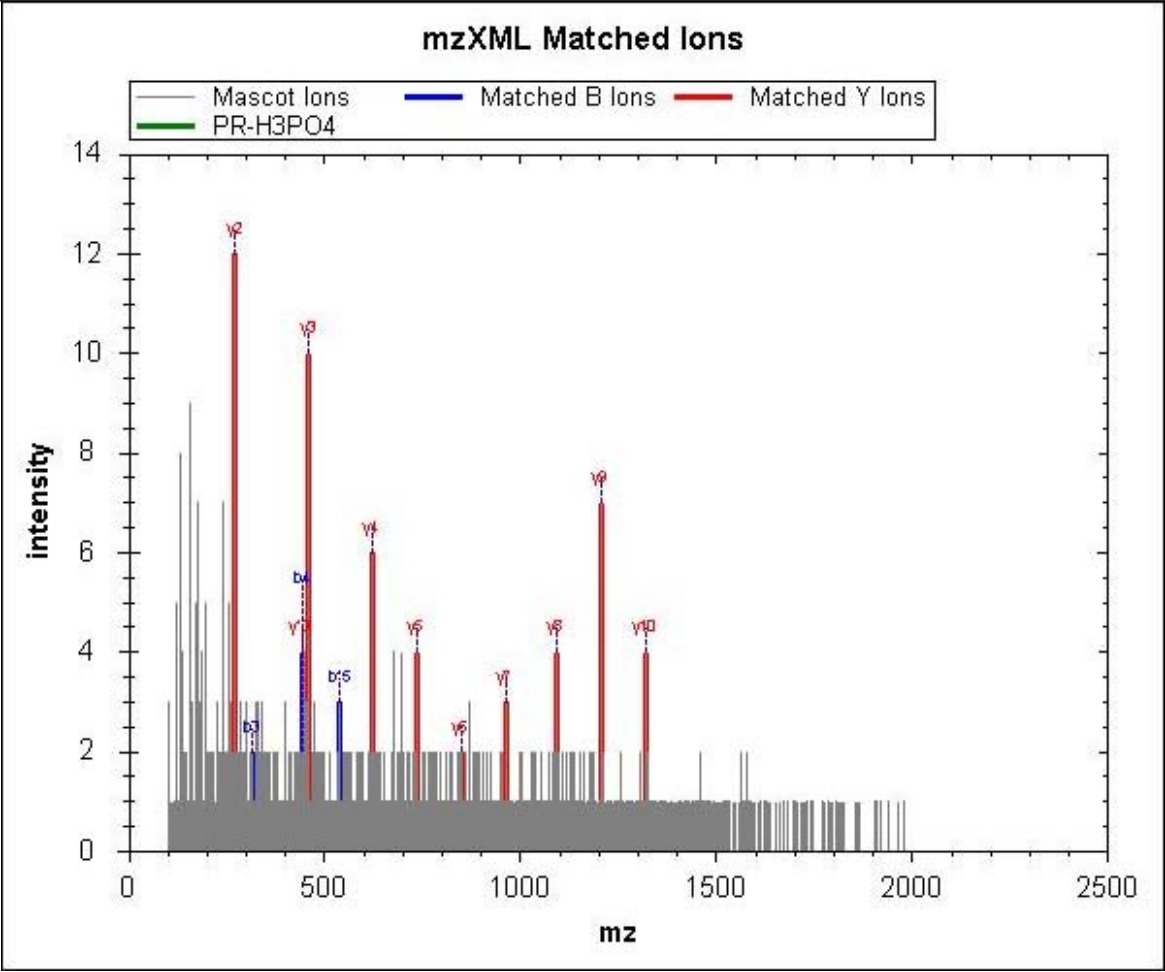

Protein index=617, ACC No: IPI00062839

Peptide index=6437 MS/MS spectrum

Sequence: LLNSELADALGGLLR, m/z:834.9678, charge:+ 2, Modification: , Mod Position:

Score: 92.8, Raw data:WET\_A3\_090615\_02.mzxml, MS/MS Elution time: 88.05833, Scan number:4892, Mass delta:0.0017, Rank:1

| No | b      | b++   | b* | b*++ | b0 | b0++ | Seq | y | y++ | y* | y*++ | y0 | y0++ | RevNo |
|----|--------|-------|----|------|----|------|-----|---|-----|----|------|----|------|-------|
| 1  | 114.09 | 57.55 |    |      |    |      | L   |   |     |    |      |    |      | 16    |

|    |         |        |         |        |         |        |   |         |        |         |        |         |        |    |
|----|---------|--------|---------|--------|---------|--------|---|---------|--------|---------|--------|---------|--------|----|
| 2  | 227.18  | 114.09 |         |        |         |        | L | 1555.84 | 778.43 | 1538.82 | 769.91 | 1537.83 | 769.42 | 15 |
| 3  | 341.22  | 171.11 | 324.19  | 162.6  |         |        | N | 1442.76 | 721.88 | 1425.73 | 713.37 | 1424.75 | 712.88 | 14 |
| 4  | 428.25  | 214.63 | 411.22  | 206.12 | 410.24  | 205.62 | S | 1328.72 | 664.86 | 1311.69 | 656.35 | 1310.71 | 655.86 | 13 |
| 5  | 557.29  | 279.15 | 540.27  | 270.64 | 539.28  | 270.14 | E | 1241.68 | 621.35 | 1224.66 | 612.83 | 1223.67 | 612.34 | 12 |
| 6  | 670.38  | 335.69 | 653.35  | 327.18 | 652.37  | 326.69 | L | 1112.64 | 556.82 | 1095.62 | 548.31 | 1094.63 | 547.82 | 11 |
| 7  | 741.41  | 371.21 | 724.39  | 362.7  | 723.4   | 362.21 | A | 999.56  | 500.28 | 982.53  | 491.77 | 981.55  | 491.28 | 10 |
| 8  | 856.44  | 428.72 | 839.41  | 420.21 | 838.43  | 419.72 | D | 928.52  | 464.76 | 911.49  | 456.25 | 910.51  | 455.76 | 9  |
| 9  | 927.48  | 464.24 | 910.45  | 455.73 | 909.47  | 455.24 | A | 813.49  | 407.25 | 796.47  | 398.74 |         |        | 8  |
| 10 | 1040.56 | 520.78 | 1023.54 | 512.27 | 1022.55 | 511.78 | L | 742.46  | 371.73 | 725.43  | 363.22 |         |        | 7  |
| 11 | 1097.58 | 549.3  | 1080.56 | 540.78 | 1079.57 | 540.29 | G | 629.37  | 315.19 | 612.35  | 306.68 |         |        | 6  |
| 12 | 1154.61 | 577.81 | 1137.58 | 569.29 | 1136.59 | 568.8  | G | 572.35  | 286.68 | 555.32  | 278.17 |         |        | 5  |
| 13 | 1267.69 | 634.35 | 1250.66 | 625.84 | 1249.68 | 625.34 | L | 515.33  | 258.17 | 498.3   | 249.66 |         |        | 4  |
| 14 | 1380.77 | 690.89 | 1363.75 | 682.38 | 1362.76 | 681.89 | L | 402.25  | 201.63 | 385.22  | 193.11 |         |        | 3  |
| 15 | 1494.82 | 747.91 | 1477.79 | 739.4  | 1476.81 | 738.91 | N | 289.16  | 145.08 | 272.14  | 136.57 |         |        | 2  |
| 16 |         |        |         |        |         |        | R | 175.12  | 88.06  | 158.09  | 79.55  |         |        | 1  |

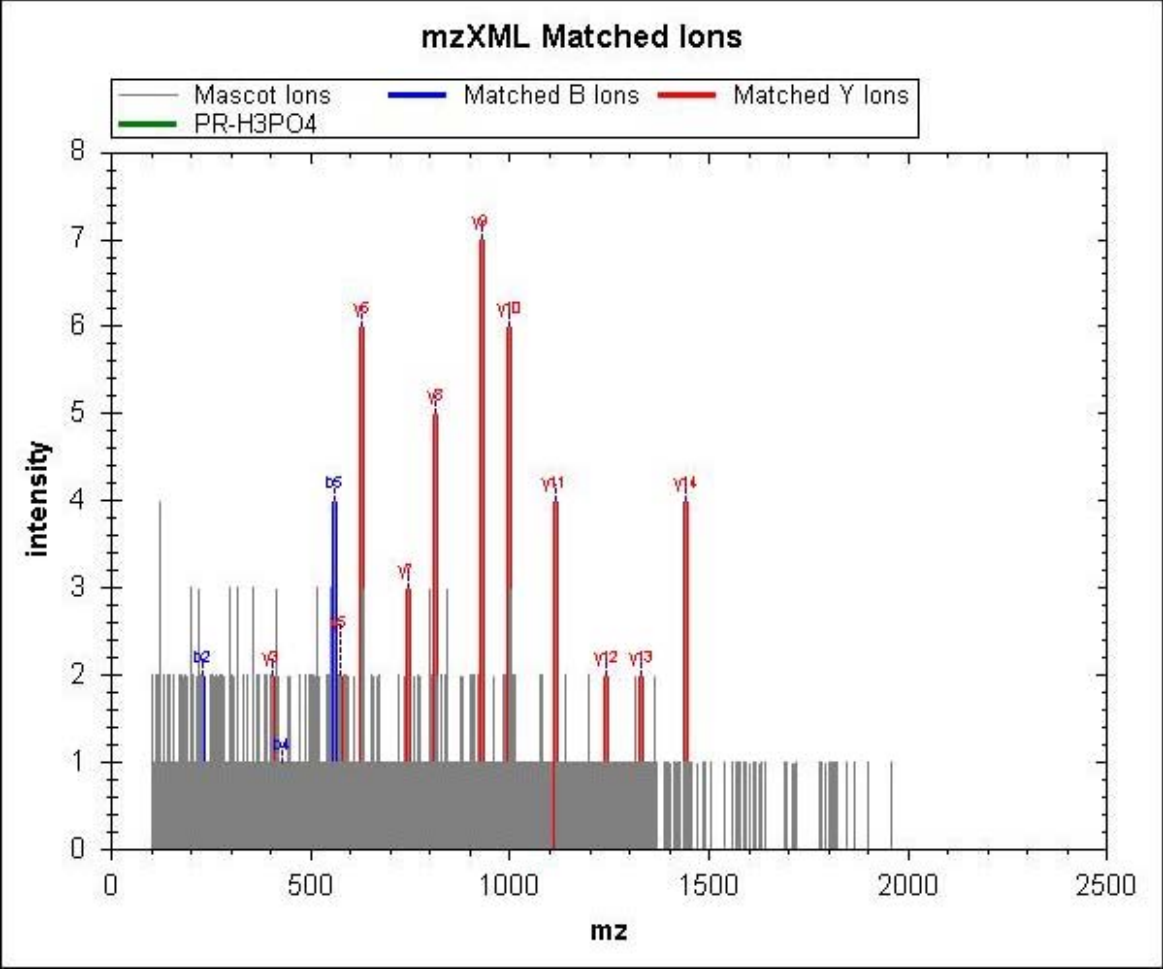

Protein index=641, ACC No:IPI00026215

Peptide index=5068 MS/MS spectrum

Sequence: EAHQLFLEPEVLDPESVELK, m/z:774.7302, charge:+ 3, Modification: , Mod Position:  
Score: 60.93, Raw data:WET\_A3\_090615\_02.mzxml, MS/MS Elution time: 68.86584, Scan number:3777,

Mass delta:-0.0138, Rank:1

| No | b       | b++     | b*      | b*++    | b0      | b0++    | Seq | y       | y++     | y*      | y*++    | y0      | y0++    | RevNo |
|----|---------|---------|---------|---------|---------|---------|-----|---------|---------|---------|---------|---------|---------|-------|
| 1  | 130.05  | 65.53   |         |         | 112.04  | 56.52   | E   |         |         |         |         |         |         | 20    |
| 2  | 201.09  | 101.05  |         |         | 183.08  | 92.04   | A   | 2193.14 | 1097.08 | 2176.12 | 1088.56 | 2175.13 | 1088.07 | 19    |
| 3  | 338.15  | 169.58  |         |         | 320.14  | 160.57  | H   | 2122.11 | 1061.56 | 2105.08 | 1053.04 | 2104.1  | 1052.55 | 18    |
| 4  | 466.2   | 233.61  | 449.18  | 225.09  | 448.19  | 224.6   | Q   | 1985.05 | 993.03  | 1968.02 | 984.51  | 1967.04 | 984.02  | 17    |
| 5  | 579.29  | 290.15  | 562.26  | 281.63  | 561.28  | 281.14  | L   | 1856.99 | 929     | 1839.96 | 920.48  | 1838.98 | 919.99  | 16    |
| 6  | 726.36  | 363.68  | 709.33  | 355.17  | 708.35  | 354.68  | F   | 1743.91 | 872.46  | 1726.88 | 863.94  | 1725.89 | 863.45  | 15    |
| 7  | 839.44  | 420.22  | 822.41  | 411.71  | 821.43  | 411.22  | L   | 1596.84 | 798.92  | 1579.81 | 790.41  | 1578.83 | 789.92  | 14    |
| 8  | 968.48  | 484.75  | 951.46  | 476.23  | 950.47  | 475.74  | E   | 1483.75 | 742.38  | 1466.73 | 733.87  | 1465.74 | 733.37  | 13    |
| 9  | 1065.54 | 533.27  | 1048.51 | 524.76  | 1047.53 | 524.27  | P   | 1354.71 | 677.86  | 1337.68 | 669.35  | 1336.7  | 668.85  | 12    |
| 10 | 1194.58 | 597.79  | 1177.55 | 589.28  | 1176.57 | 588.79  | E   | 1257.66 | 629.33  | 1240.63 | 620.82  | 1239.65 | 620.33  | 11    |
| 11 | 1293.65 | 647.33  | 1276.62 | 638.81  | 1275.64 | 638.32  | V   | 1128.61 | 564.81  | 1111.59 | 556.3   | 1110.6  | 555.81  | 10    |
| 12 | 1406.73 | 703.87  | 1389.7  | 695.36  | 1388.72 | 694.86  | L   | 1029.55 | 515.28  | 1012.52 | 506.76  | 1011.54 | 506.27  | 9     |
| 13 | 1521.76 | 761.38  | 1504.73 | 752.87  | 1503.75 | 752.38  | D   | 916.46  | 458.73  | 899.44  | 450.22  | 898.45  | 449.73  | 8     |
| 14 | 1618.81 | 809.91  | 1601.78 | 801.4   | 1600.8  | 800.9   | P   | 801.44  | 401.22  | 784.41  | 392.71  | 783.42  | 392.22  | 7     |
| 15 | 1747.85 | 874.43  | 1730.83 | 865.92  | 1729.84 | 865.43  | E   | 704.38  | 352.69  | 687.36  | 344.18  | 686.37  | 343.69  | 6     |
| 16 | 1834.89 | 917.95  | 1817.86 | 909.43  | 1816.88 | 908.94  | S   | 575.34  | 288.17  | 558.31  | 279.66  | 557.33  | 279.17  | 5     |
| 17 | 1933.95 | 967.48  | 1916.93 | 958.97  | 1915.94 | 958.48  | V   | 488.31  | 244.66  | 471.28  | 236.14  | 470.3   | 235.65  | 4     |
| 18 | 2063    | 1032    | 2045.97 | 1023.49 | 2044.99 | 1023    | E   | 389.24  | 195.12  | 372.21  | 186.61  | 371.23  | 186.12  | 3     |
| 19 | 2176.08 | 1088.54 | 2159.05 | 1080.03 | 2158.07 | 1079.54 | L   | 260.2   | 130.6   | 243.17  | 122.09  |         |         | 2     |
| 20 |         |         |         |         |         |         | K   | 147.11  | 74.06   | 130.09  | 65.55   |         |         | 1     |

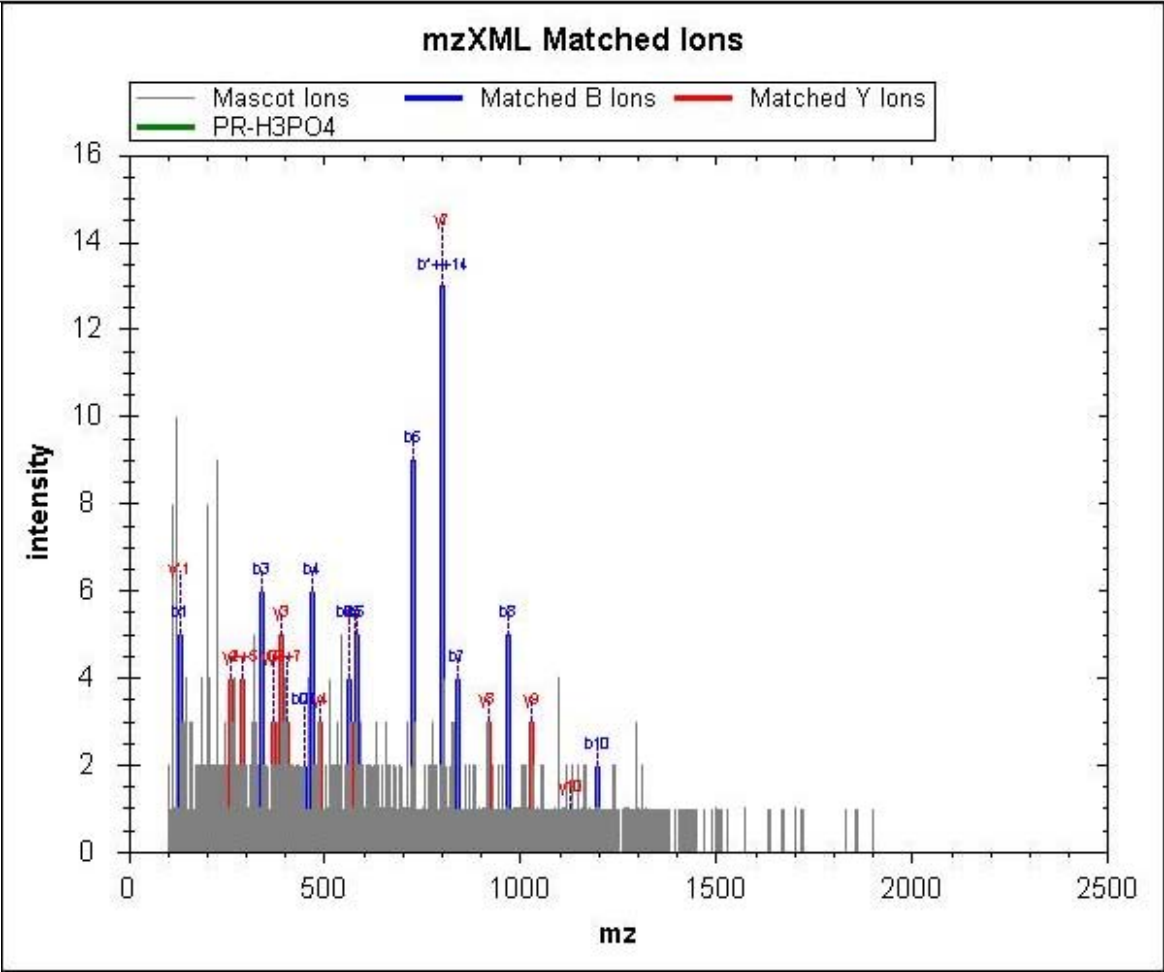

Protein index=642, ACC No:IPI00014537

Peptide index=1144 MS/MS spectrum

Sequence: TFDQLTPEESKER, m/z:527.2544, charge:+ 3, Modification: , Mod Position:

Score: 56.56, Raw data:WET\_A3\_090615\_02.mzxml, MS/MS Elution time: 29.82267, Scan number:1509, Mass delta:-0.014, Rank:1

| No | b       | b++    | b*      | b*++   | b0      | b0++   | Seq | y       | y++    | y*      | y*++   | y0      | y0++   | RevNo |
|----|---------|--------|---------|--------|---------|--------|-----|---------|--------|---------|--------|---------|--------|-------|
| 1  | 102.05  | 51.53  |         |        | 84.04   | 42.53  | T   |         |        |         |        |         |        | 13    |
| 2  | 249.12  | 125.07 |         |        | 231.11  | 116.06 | F   | 1478.71 | 739.86 | 1461.69 | 731.35 | 1460.7  | 730.85 | 12    |
| 3  | 364.15  | 182.58 |         |        | 346.14  | 173.57 | D   | 1331.64 | 666.33 | 1314.62 | 657.81 | 1313.63 | 657.32 | 11    |
| 4  | 492.21  | 246.61 | 475.18  | 238.09 | 474.2   | 237.6  | Q   | 1216.62 | 608.81 | 1199.59 | 600.3  | 1198.61 | 599.81 | 10    |
| 5  | 605.29  | 303.15 | 588.27  | 294.64 | 587.28  | 294.14 | L   | 1088.56 | 544.78 | 1071.53 | 536.27 | 1070.55 | 535.78 | 9     |
| 6  | 706.34  | 353.67 | 689.31  | 345.16 | 688.33  | 344.67 | T   | 975.47  | 488.24 | 958.45  | 479.73 | 957.46  | 479.24 | 8     |
| 7  | 803.39  | 402.2  | 786.37  | 393.69 | 785.38  | 393.2  | P   | 874.43  | 437.72 | 857.4   | 429.2  | 856.42  | 428.71 | 7     |
| 8  | 932.44  | 466.72 | 915.41  | 458.21 | 914.43  | 457.72 | E   | 777.37  | 389.19 | 760.35  | 380.68 | 759.36  | 380.19 | 6     |
| 9  | 1061.48 | 531.24 | 1044.45 | 522.73 | 1043.47 | 522.24 | E   | 648.33  | 324.67 | 631.3   | 316.16 | 630.32  | 315.66 | 5     |
| 10 | 1148.51 | 574.76 | 1131.48 | 566.25 | 1130.5  | 565.75 | S   | 519.29  | 260.15 | 502.26  | 251.63 | 501.28  | 251.14 | 4     |
| 11 | 1276.61 | 638.81 | 1259.58 | 630.29 | 1258.59 | 629.8  | K   | 432.26  | 216.63 | 415.23  | 208.12 | 414.25  | 207.63 | 3     |
| 12 | 1405.65 | 703.33 | 1388.62 | 694.81 | 1387.64 | 694.32 | E   | 304.16  | 152.58 | 287.13  | 144.07 | 286.15  | 143.58 | 2     |



|    |         |        |         |        |         |        |   |        |        |        |        |        |        |   |
|----|---------|--------|---------|--------|---------|--------|---|--------|--------|--------|--------|--------|--------|---|
| 12 | 1355.63 | 678.32 | 1338.61 | 669.81 | 1337.62 | 669.32 | S | 319.17 | 160.09 | 302.15 | 151.58 | 301.16 | 151.08 | 3 |
| 13 | 1412.66 | 706.83 | 1395.63 | 698.32 | 1394.64 | 697.83 | G | 232.14 | 116.57 | 215.11 | 108.06 |        |        | 2 |
| 14 |         |        |         |        |         |        | R | 175.12 | 88.06  | 158.09 | 79.55  |        |        | 1 |

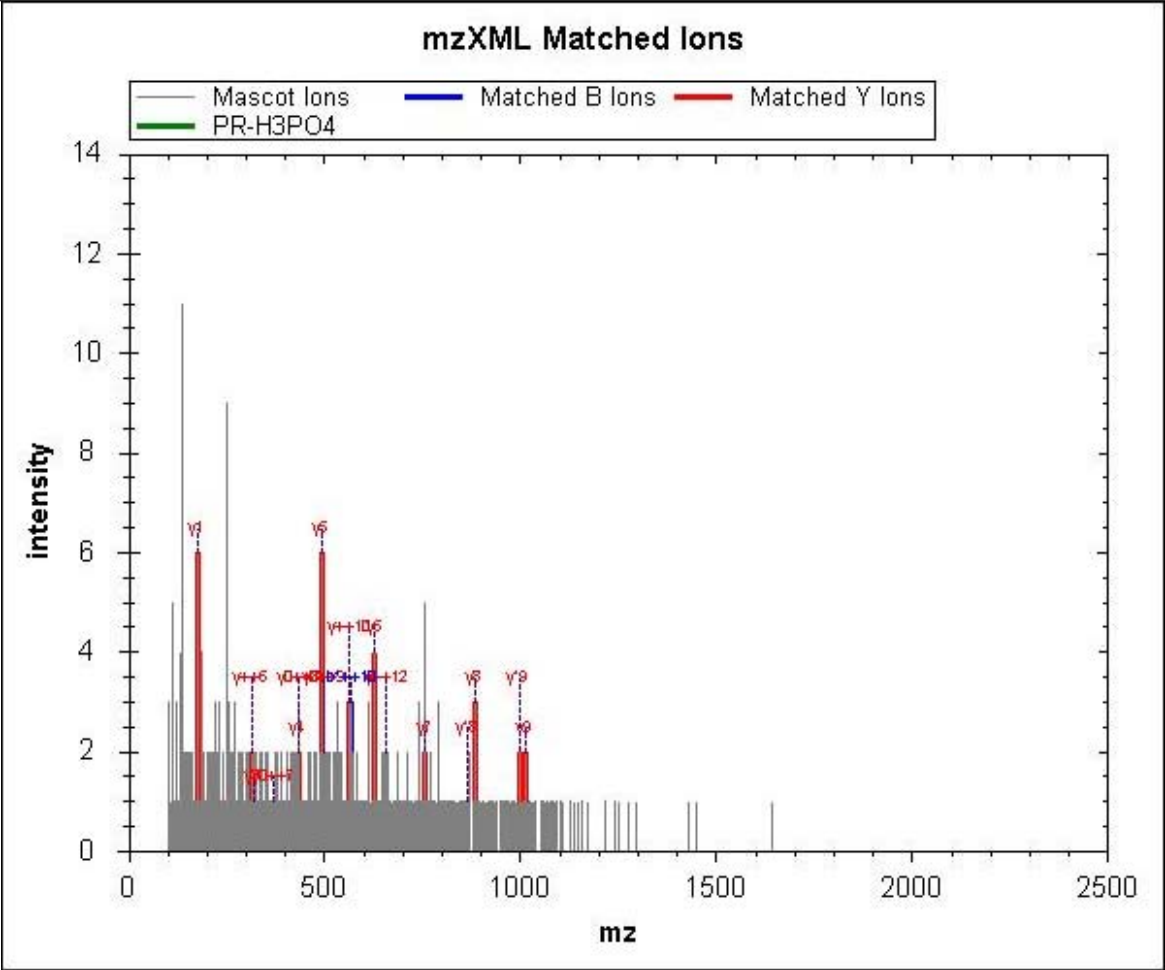

Protein index=646, ACC No:IPI00335589

Peptide index=1827 MS/MS spectrum

Sequence: APSTWEESGLR, m/z:616.8028, charge:+ 2, Modification: , Mod Position:

Score: 52.39, Raw data:WET\_A3\_090615\_01.mzxml, MS/MS Elution time: 38.07917, Scan number:1989, Mass delta:0.0077, Rank:1

| No | b      | b++    | b0     | b0++   | Seq | y       | y++    | y*      | y*++   | y0      | y0++   | RevNo |
|----|--------|--------|--------|--------|-----|---------|--------|---------|--------|---------|--------|-------|
| 1  | 72.04  | 36.53  |        |        | A   |         |        |         |        |         |        | 11    |
| 2  | 169.1  | 85.05  |        |        | P   | 1161.55 | 581.28 | 1144.53 | 572.77 | 1143.54 | 572.28 | 10    |
| 3  | 256.13 | 128.57 | 238.12 | 119.56 | S   | 1064.5  | 532.75 | 1047.47 | 524.24 | 1046.49 | 523.75 | 9     |
| 4  | 357.18 | 179.09 | 339.17 | 170.09 | T   | 977.47  | 489.24 | 960.44  | 480.72 | 959.46  | 480.23 | 8     |
| 5  | 543.26 | 272.13 | 525.25 | 263.13 | W   | 876.42  | 438.71 | 859.39  | 430.2  | 858.41  | 429.71 | 7     |
| 6  | 672.3  | 336.65 | 654.29 | 327.65 | E   | 690.34  | 345.67 | 673.32  | 337.16 | 672.33  | 336.67 | 6     |
| 7  | 801.34 | 401.17 | 783.33 | 392.17 | E   | 561.3   | 281.15 | 544.27  | 272.64 | 543.29  | 272.15 | 5     |
| 8  | 888.37 | 444.69 | 870.36 | 435.69 | S   | 432.26  | 216.63 | 415.23  | 208.12 | 414.25  | 207.63 | 4     |
| 9  | 945.39 | 473.2  | 927.38 | 464.2  | G   | 345.22  | 173.12 | 328.2   | 164.6  |         |        | 3     |

|    |         |        |         |        |   |        |        |        |        |  |  |   |
|----|---------|--------|---------|--------|---|--------|--------|--------|--------|--|--|---|
| 10 | 1058.48 | 529.74 | 1040.47 | 520.74 | L | 288.2  | 144.61 | 271.18 | 136.09 |  |  | 2 |
| 11 |         |        |         |        | R | 175.12 | 88.06  | 158.09 | 79.55  |  |  | 1 |

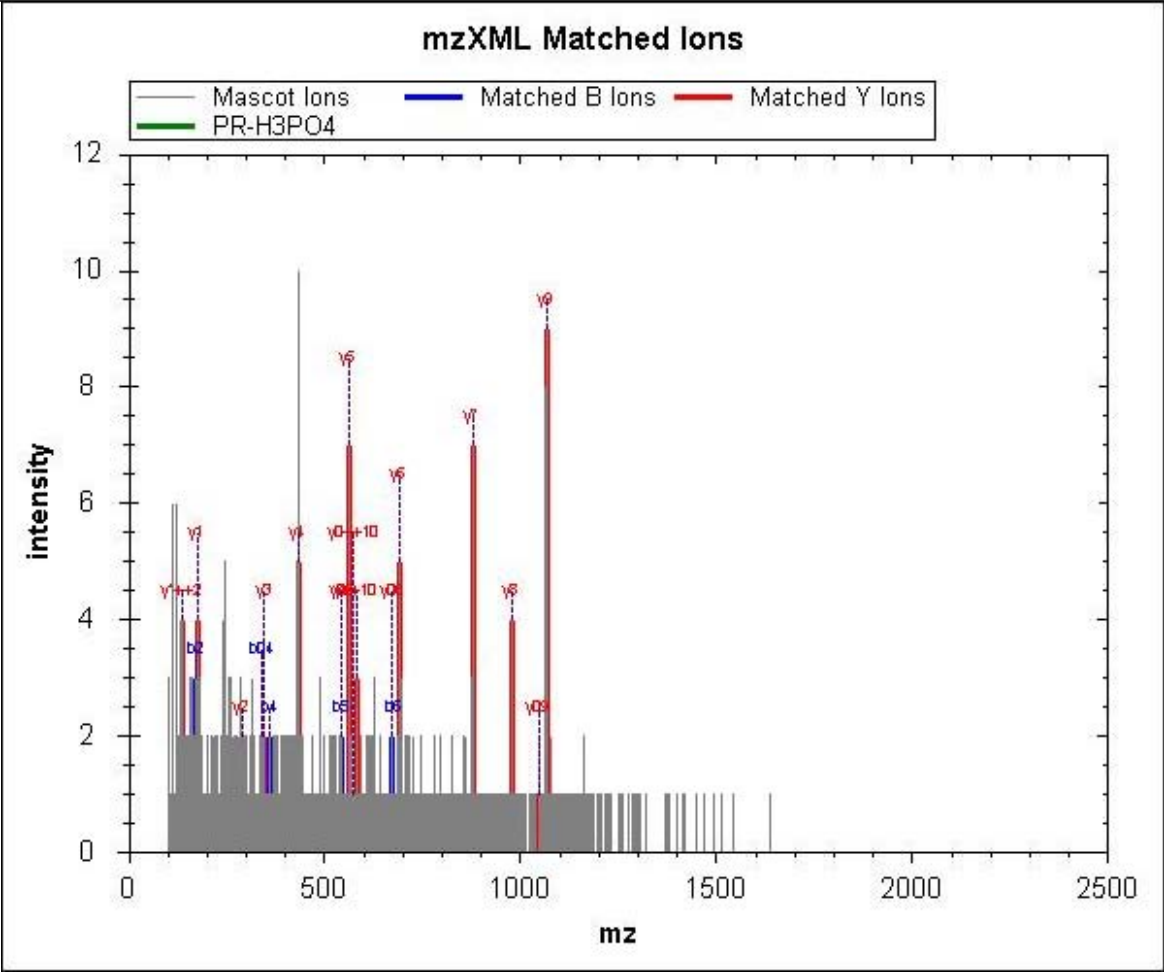

Protein index=647, ACC No:IP100007068

Peptide index=7015 MS/MS spectrum

Sequence: DITYFIQQLR, m/z:705.4026, charge:+ 2, Modification: , Mod Position:

Score: 68.3, Raw data:WET\_B3\_090616\_02.mzxml, MS/MS Elution time: 103.7718, Scan number:5837, Mass delta:0.0038, Rank:1

| No | b       | b++    | b*      | b*++   | b0      | b0++   | Seq | y       | y++    | y*      | y*++   | y0      | y0++   | RevNo |
|----|---------|--------|---------|--------|---------|--------|-----|---------|--------|---------|--------|---------|--------|-------|
| 1  | 116.03  | 58.52  |         |        | 98.02   | 49.52  | D   |         |        |         |        |         |        | 11    |
| 2  | 229.12  | 115.06 |         |        | 211.11  | 106.06 | I   | 1294.75 | 647.88 | 1277.73 | 639.37 | 1276.74 | 638.87 | 10    |
| 3  | 330.17  | 165.59 |         |        | 312.16  | 156.58 | T   | 1181.67 | 591.34 | 1164.64 | 582.82 | 1163.66 | 582.33 | 9     |
| 4  | 493.23  | 247.12 |         |        | 475.22  | 238.11 | Y   | 1080.62 | 540.81 | 1063.59 | 532.3  |         |        | 8     |
| 5  | 640.3   | 320.65 |         |        | 622.29  | 311.65 | F   | 917.56  | 459.28 | 900.53  | 450.77 |         |        | 7     |
| 6  | 753.38  | 377.19 |         |        | 735.37  | 368.19 | I   | 770.49  | 385.75 | 753.46  | 377.23 |         |        | 6     |
| 7  | 881.44  | 441.22 | 864.41  | 432.71 | 863.43  | 432.22 | Q   | 657.4   | 329.21 | 640.38  | 320.69 |         |        | 5     |
| 8  | 1009.5  | 505.25 | 992.47  | 496.74 | 991.49  | 496.25 | Q   | 529.35  | 265.18 | 512.32  | 256.66 |         |        | 4     |
| 9  | 1122.58 | 561.8  | 1105.56 | 553.28 | 1104.57 | 552.79 | L   | 401.29  | 201.15 | 384.26  | 192.63 |         |        | 3     |
| 10 | 1235.67 | 618.34 | 1218.64 | 609.82 | 1217.66 | 609.33 | L   | 288.2   | 144.61 | 271.18  | 136.09 |         |        | 2     |

|    |  |  |  |  |  |   |        |       |        |       |  |  |   |
|----|--|--|--|--|--|---|--------|-------|--------|-------|--|--|---|
| 11 |  |  |  |  |  | R | 175.12 | 88.06 | 158.09 | 79.55 |  |  | 1 |
|----|--|--|--|--|--|---|--------|-------|--------|-------|--|--|---|

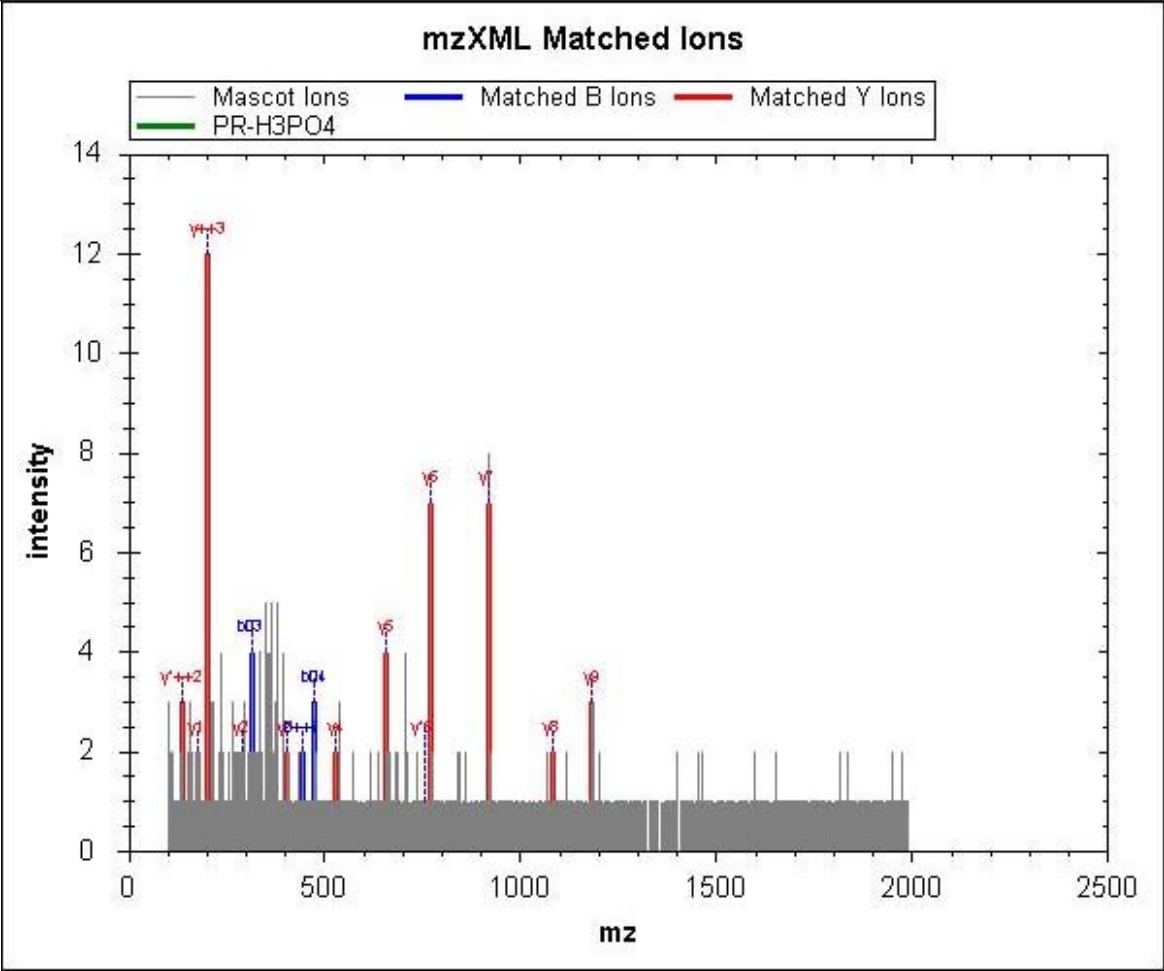

Protein index=648, ACC No:IPI00012578

Peptide index=7171 MS/MS spectrum

Sequence: DAQVVQVVLDGLSNILK, m/z:906.0241, charge:+ 2, Modification: , Mod Position:

Score: 87.03, Raw data:WET\_A3\_090615\_02.mzxml, MS/MS Elution time: 109.9917, Scan number:6197, Mass delta:0.0058, Rank:1

| No | b       | b++    | b*      | b*++   | b0      | b0++   | Seq | y       | y++    | y*      | y*++   | y0      | y0++   | RevNo |
|----|---------|--------|---------|--------|---------|--------|-----|---------|--------|---------|--------|---------|--------|-------|
| 1  | 116.03  | 58.52  |         |        | 98.02   | 49.52  | D   |         |        |         |        |         |        | 17    |
| 2  | 187.07  | 94.04  |         |        | 169.06  | 85.03  | A   | 1696    | 848.5  | 1678.97 | 839.99 | 1677.99 | 839.5  | 16    |
| 3  | 315.13  | 158.07 | 298.1   | 149.56 | 297.12  | 149.06 | Q   | 1624.96 | 812.99 | 1607.94 | 804.47 | 1606.95 | 803.98 | 15    |
| 4  | 414.2   | 207.6  | 397.17  | 199.09 | 396.19  | 198.6  | V   | 1496.9  | 748.96 | 1479.88 | 740.44 | 1478.89 | 739.95 | 14    |
| 5  | 513.27  | 257.14 | 496.24  | 248.62 | 495.26  | 248.13 | V   | 1397.84 | 699.42 | 1380.81 | 690.91 | 1379.83 | 690.42 | 13    |
| 6  | 641.33  | 321.17 | 624.3   | 312.65 | 623.31  | 312.16 | Q   | 1298.77 | 649.89 | 1281.74 | 641.37 | 1280.76 | 640.88 | 12    |
| 7  | 740.39  | 370.7  | 723.37  | 362.19 | 722.38  | 361.7  | V   | 1170.71 | 585.86 | 1153.68 | 577.34 | 1152.7  | 576.85 | 11    |
| 8  | 839.46  | 420.23 | 822.44  | 411.72 | 821.45  | 411.23 | V   | 1071.64 | 536.32 | 1054.61 | 527.81 | 1053.63 | 527.32 | 10    |
| 9  | 952.55  | 476.78 | 935.52  | 468.26 | 934.54  | 467.77 | L   | 972.57  | 486.79 | 955.55  | 478.28 | 954.56  | 477.78 | 9     |
| 10 | 1067.57 | 534.29 | 1050.55 | 525.78 | 1049.56 | 525.28 | D   | 859.49  | 430.25 | 842.46  | 421.73 | 841.48  | 421.24 | 8     |
| 11 | 1124.59 | 562.8  | 1107.57 | 554.29 | 1106.58 | 553.8  | G   | 744.46  | 372.73 | 727.43  | 364.22 | 726.45  | 363.73 | 7     |

|    |         |        |         |        |         |        |   |        |        |        |        |        |        |   |
|----|---------|--------|---------|--------|---------|--------|---|--------|--------|--------|--------|--------|--------|---|
| 12 | 1237.68 | 619.34 | 1220.65 | 610.83 | 1219.67 | 610.34 | L | 687.44 | 344.22 | 670.41 | 335.71 | 669.43 | 335.22 | 6 |
| 13 | 1324.71 | 662.86 | 1307.68 | 654.35 | 1306.7  | 653.85 | S | 574.36 | 287.68 | 557.33 | 279.17 | 556.35 | 278.68 | 5 |
| 14 | 1438.75 | 719.88 | 1421.73 | 711.37 | 1420.74 | 710.88 | N | 487.32 | 244.17 | 470.3  | 235.65 |        |        | 4 |
| 15 | 1551.84 | 776.42 | 1534.81 | 767.91 | 1533.83 | 767.42 | I | 373.28 | 187.14 | 356.25 | 178.63 |        |        | 3 |
| 16 | 1664.92 | 832.96 | 1647.9  | 824.45 | 1646.91 | 823.96 | L | 260.2  | 130.6  | 243.17 | 122.09 |        |        | 2 |
| 17 |         |        |         |        |         |        | K | 147.11 | 74.06  | 130.09 | 65.55  |        |        | 1 |

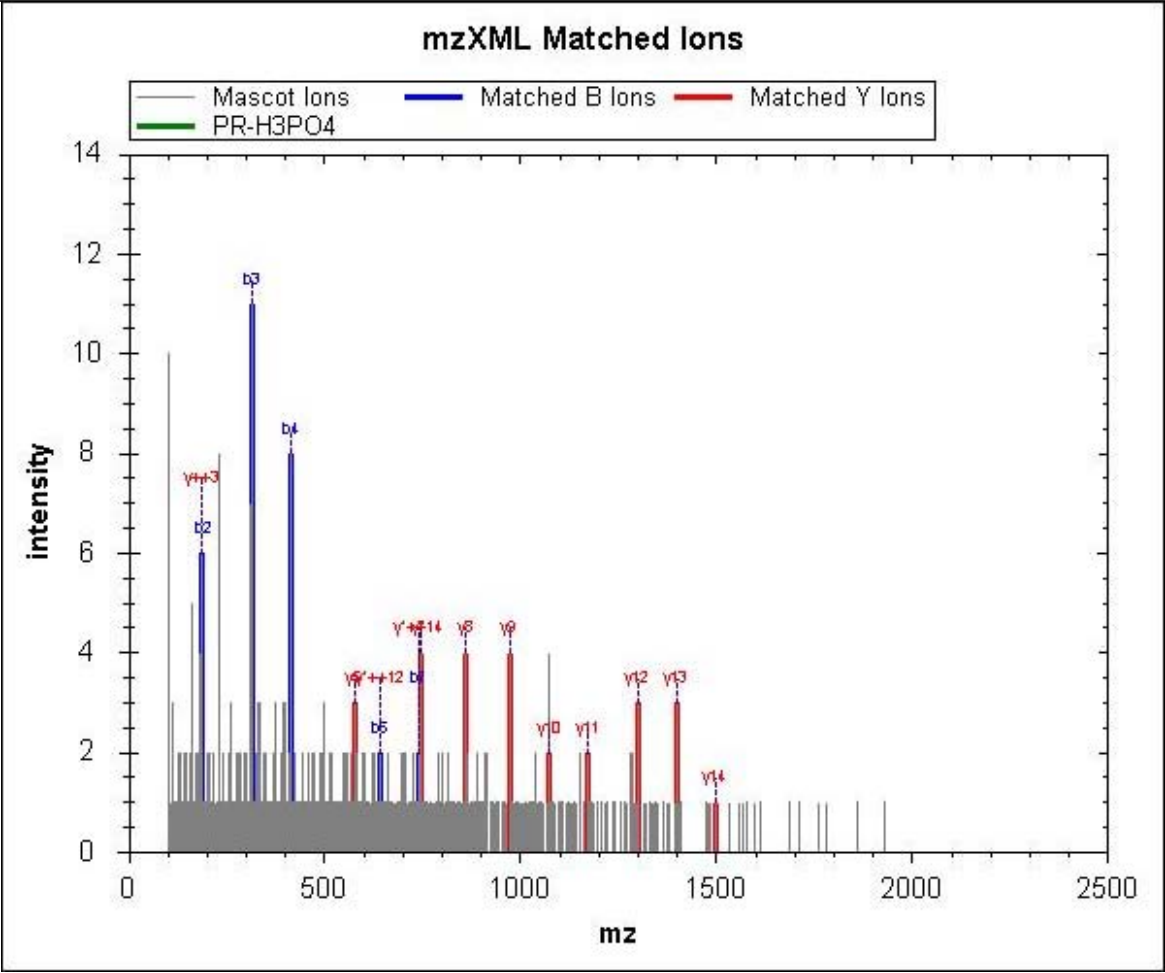

Protein index=651, ACC No:IPI00006684

Peptide index=6691 MS/MS spectrum

Sequence: GTLGGLFSQILQGEDIVR, m/z:952.0226, charge:+ 2, Modification: , Mod Position:

Score: 126.59, Raw data:WET\_A3\_090615\_02.mzxml, MS/MS Elution time: 94.068, Scan number:5241, Mass delta:-0.0117, Rank:1

| No | b      | b++    | b* | b*++ | b0     | b0++   | Seq | y       | y++    | y*      | y*++   | y0      | y0++   | RevNo |
|----|--------|--------|----|------|--------|--------|-----|---------|--------|---------|--------|---------|--------|-------|
| 1  | 58.03  | 29.52  |    |      |        |        | G   |         |        |         |        |         |        | 18    |
| 2  | 159.08 | 80.04  |    |      | 141.07 | 71.04  | T   | 1846.01 | 923.51 | 1828.98 | 914.99 | 1828    | 914.5  | 17    |
| 3  | 272.16 | 136.58 |    |      | 254.15 | 127.58 | L   | 1744.96 | 872.98 | 1727.93 | 864.47 | 1726.95 | 863.98 | 16    |
| 4  | 329.18 | 165.09 |    |      | 311.17 | 156.09 | G   | 1631.88 | 816.44 | 1614.85 | 807.93 | 1613.86 | 807.44 | 15    |
| 5  | 386.2  | 193.61 |    |      | 368.19 | 184.6  | G   | 1574.85 | 787.93 | 1557.83 | 779.42 | 1556.84 | 778.93 | 14    |
| 6  | 499.29 | 250.15 |    |      | 481.28 | 241.14 | L   | 1517.83 | 759.42 | 1500.81 | 750.91 | 1499.82 | 750.41 | 13    |

|    |         |        |         |        |         |        |   |         |        |         |        |         |        |    |
|----|---------|--------|---------|--------|---------|--------|---|---------|--------|---------|--------|---------|--------|----|
| 7  | 646.36  | 323.68 |         |        | 628.35  | 314.68 | F | 1404.75 | 702.88 | 1387.72 | 694.36 | 1386.74 | 693.87 | 12 |
| 8  | 733.39  | 367.2  |         |        | 715.38  | 358.19 | S | 1257.68 | 629.34 | 1240.65 | 620.83 | 1239.67 | 620.34 | 11 |
| 9  | 861.45  | 431.23 | 844.42  | 422.71 | 843.44  | 422.22 | Q | 1170.65 | 585.83 | 1153.62 | 577.31 | 1152.64 | 576.82 | 10 |
| 10 | 974.53  | 487.77 | 957.5   | 479.26 | 956.52  | 478.76 | I | 1042.59 | 521.8  | 1025.56 | 513.28 | 1024.58 | 512.79 | 9  |
| 11 | 1087.61 | 544.31 | 1070.59 | 535.8  | 1069.6  | 535.31 | L | 929.51  | 465.26 | 912.48  | 456.74 | 911.49  | 456.25 | 8  |
| 12 | 1215.67 | 608.34 | 1198.65 | 599.83 | 1197.66 | 599.33 | Q | 816.42  | 408.71 | 799.39  | 400.2  | 798.41  | 399.71 | 7  |
| 13 | 1272.69 | 636.85 | 1255.67 | 628.34 | 1254.68 | 627.85 | G | 688.36  | 344.68 | 671.34  | 336.17 | 670.35  | 335.68 | 6  |
| 14 | 1401.74 | 701.37 | 1384.71 | 692.86 | 1383.73 | 692.37 | E | 631.34  | 316.17 | 614.31  | 307.66 | 613.33  | 307.17 | 5  |
| 15 | 1516.76 | 758.89 | 1499.74 | 750.37 | 1498.75 | 749.88 | D | 502.3   | 251.65 | 485.27  | 243.14 | 484.29  | 242.65 | 4  |
| 16 | 1629.85 | 815.43 | 1612.82 | 806.91 | 1611.84 | 806.42 | I | 387.27  | 194.14 | 370.24  | 185.63 |         |        | 3  |
| 17 | 1728.92 | 864.96 | 1711.89 | 856.45 | 1710.91 | 855.96 | V | 274.19  | 137.6  | 257.16  | 129.08 |         |        | 2  |
| 18 |         |        |         |        |         |        | R | 175.12  | 88.06  | 158.09  | 79.55  |         |        | 1  |

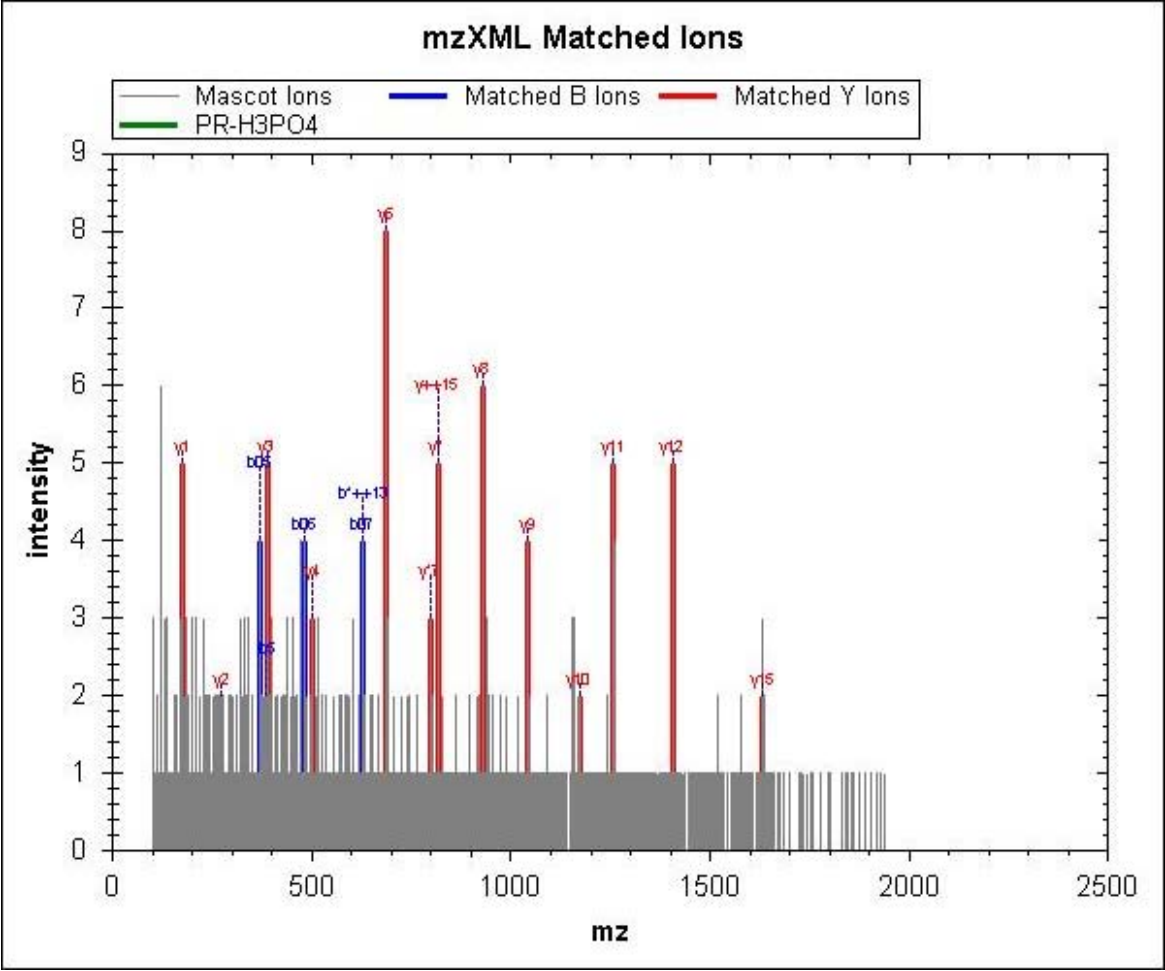

Protein index=653, ACC No:IPI00031820

Peptide index=6209 MS/MS spectrum

Sequence: SLQALGEVIEAELR, m/z:764.4255, charge:+ 2, Modification: , Mod Position:

Score: 117.76, Raw data:WET\_B3\_090616\_03.mzxml, MS/MS Elution time: 84.27016, Scan number:4689, Mass delta:0.0029, Rank:1

| No | b | b++ | b* | b*++ | b0 | b0++ | Seq | y | y++ | y* | y*++ | y0 | y0++ | RevNo |
|----|---|-----|----|------|----|------|-----|---|-----|----|------|----|------|-------|
|----|---|-----|----|------|----|------|-----|---|-----|----|------|----|------|-------|

|    |         |        |         |        |         |        |   |         |        |         |        |         |        |    |
|----|---------|--------|---------|--------|---------|--------|---|---------|--------|---------|--------|---------|--------|----|
| 1  | 88.04   | 44.52  |         |        | 70.03   | 35.52  | S |         |        |         |        |         |        | 14 |
| 2  | 201.12  | 101.07 |         |        | 183.11  | 92.06  | L | 1440.81 | 720.91 | 1423.78 | 712.39 | 1422.8  | 711.9  | 13 |
| 3  | 329.18  | 165.09 | 312.16  | 156.58 | 311.17  | 156.09 | Q | 1327.72 | 664.36 | 1310.7  | 655.85 | 1309.71 | 655.36 | 12 |
| 4  | 400.22  | 200.61 | 383.19  | 192.1  | 382.21  | 191.61 | A | 1199.66 | 600.34 | 1182.64 | 591.82 | 1181.65 | 591.33 | 11 |
| 5  | 513.3   | 257.16 | 496.28  | 248.64 | 495.29  | 248.15 | L | 1128.63 | 564.82 | 1111.6  | 556.3  | 1110.62 | 555.81 | 10 |
| 6  | 570.32  | 285.67 | 553.3   | 277.15 | 552.31  | 276.66 | G | 1015.54 | 508.27 | 998.52  | 499.76 | 997.53  | 499.27 | 9  |
| 7  | 699.37  | 350.19 | 682.34  | 341.67 | 681.36  | 341.18 | E | 958.52  | 479.76 | 941.49  | 471.25 | 940.51  | 470.76 | 8  |
| 8  | 798.44  | 399.72 | 781.41  | 391.21 | 780.43  | 390.72 | V | 829.48  | 415.24 | 812.45  | 406.73 | 811.47  | 406.24 | 7  |
| 9  | 911.52  | 456.26 | 894.49  | 447.75 | 893.51  | 447.26 | I | 730.41  | 365.71 | 713.38  | 357.2  | 712.4   | 356.7  | 6  |
| 10 | 1040.56 | 520.78 | 1023.54 | 512.27 | 1022.55 | 511.78 | E | 617.33  | 309.17 | 600.3   | 300.65 | 599.31  | 300.16 | 5  |
| 11 | 1111.6  | 556.3  | 1094.57 | 547.79 | 1093.59 | 547.3  | A | 488.28  | 244.65 | 471.26  | 236.13 | 470.27  | 235.64 | 4  |
| 12 | 1240.64 | 620.82 | 1223.62 | 612.31 | 1222.63 | 611.82 | E | 417.25  | 209.13 | 400.22  | 200.61 | 399.24  | 200.12 | 3  |
| 13 | 1353.73 | 677.37 | 1336.7  | 668.85 | 1335.72 | 668.36 | L | 288.2   | 144.61 | 271.18  | 136.09 |         |        | 2  |
| 14 |         |        |         |        |         |        | R | 175.12  | 88.06  | 158.09  | 79.55  |         |        | 1  |

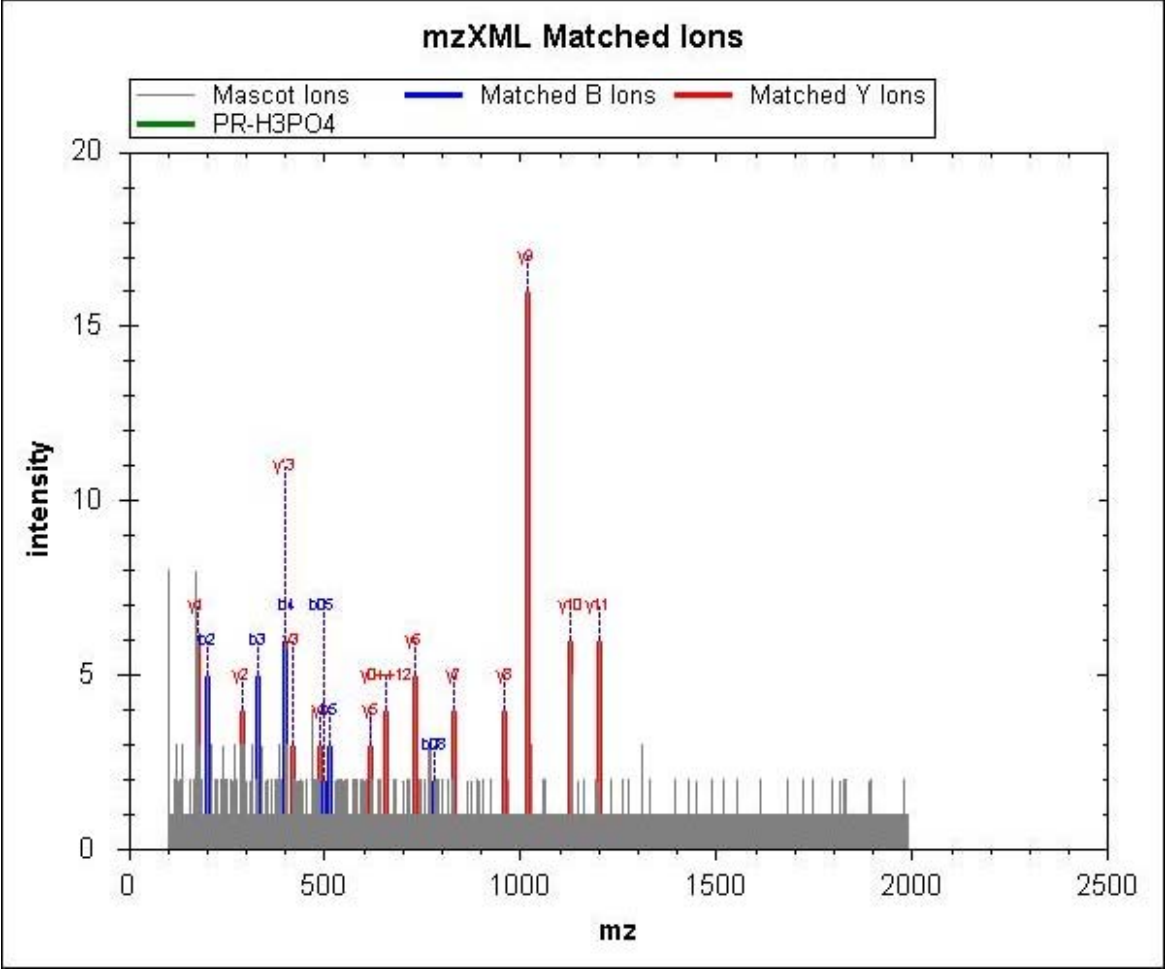

Protein index=656, ACC No:IP100298423

Peptide index=6789 MS/MS spectrum

Sequence: LGSLIGLIVEEGEDWK, m/z:879.4738, charge:+ 2, Modification: , Mod Position:

Score: 83.51, Raw data:WET\_B3\_090616\_02.mzxml, MS/MS Elution time: 96.04617, Scan number:5383, Mass delta:0.0098, Rank:1

| No | b       | b++    | b0      | b0++   | Seq | y       | y++    | y*      | y*++   | y0      | y0++   | RevNo |
|----|---------|--------|---------|--------|-----|---------|--------|---------|--------|---------|--------|-------|
| 1  | 114.09  | 57.55  |         |        | L   |         |        |         |        |         |        | 16    |
| 2  | 171.11  | 86.06  |         |        | G   | 1644.85 | 822.93 | 1627.82 | 814.41 | 1626.84 | 813.92 | 15    |
| 3  | 258.14  | 129.58 | 240.13  | 120.57 | S   | 1587.83 | 794.42 | 1570.8  | 785.9  | 1569.82 | 785.41 | 14    |
| 4  | 371.23  | 186.12 | 353.22  | 177.11 | L   | 1500.79 | 750.9  | 1483.77 | 742.39 | 1482.78 | 741.9  | 13    |
| 5  | 484.31  | 242.66 | 466.3   | 233.65 | I   | 1387.71 | 694.36 | 1370.68 | 685.85 | 1369.7  | 685.35 | 12    |
| 6  | 541.33  | 271.17 | 523.32  | 262.17 | G   | 1274.63 | 637.82 | 1257.6  | 629.3  | 1256.62 | 628.81 | 11    |
| 7  | 654.42  | 327.71 | 636.41  | 318.71 | L   | 1217.6  | 609.31 | 1200.58 | 600.79 | 1199.59 | 600.3  | 10    |
| 8  | 767.5   | 384.25 | 749.49  | 375.25 | I   | 1104.52 | 552.76 | 1087.49 | 544.25 | 1086.51 | 543.76 | 9     |
| 9  | 866.57  | 433.79 | 848.56  | 424.78 | V   | 991.44  | 496.22 | 974.41  | 487.71 | 973.43  | 487.22 | 8     |
| 10 | 995.61  | 498.31 | 977.6   | 489.31 | E   | 892.37  | 446.69 | 875.34  | 438.17 | 874.36  | 437.68 | 7     |
| 11 | 1124.66 | 562.83 | 1106.65 | 553.83 | E   | 763.33  | 382.17 | 746.3   | 373.65 | 745.32  | 373.16 | 6     |
| 12 | 1181.68 | 591.34 | 1163.67 | 582.34 | G   | 634.28  | 317.65 | 617.26  | 309.13 | 616.27  | 308.64 | 5     |
| 13 | 1310.72 | 655.86 | 1292.71 | 646.86 | E   | 577.26  | 289.13 | 560.24  | 280.62 | 559.25  | 280.13 | 4     |
| 14 | 1425.75 | 713.38 | 1407.74 | 704.37 | D   | 448.22  | 224.61 | 431.19  | 216.1  | 430.21  | 215.61 | 3     |
| 15 | 1611.83 | 806.42 | 1593.82 | 797.41 | W   | 333.19  | 167.1  | 316.17  | 158.59 |         |        | 2     |
| 16 |         |        |         |        | K   | 147.11  | 74.06  | 130.09  | 65.55  |         |        | 1     |

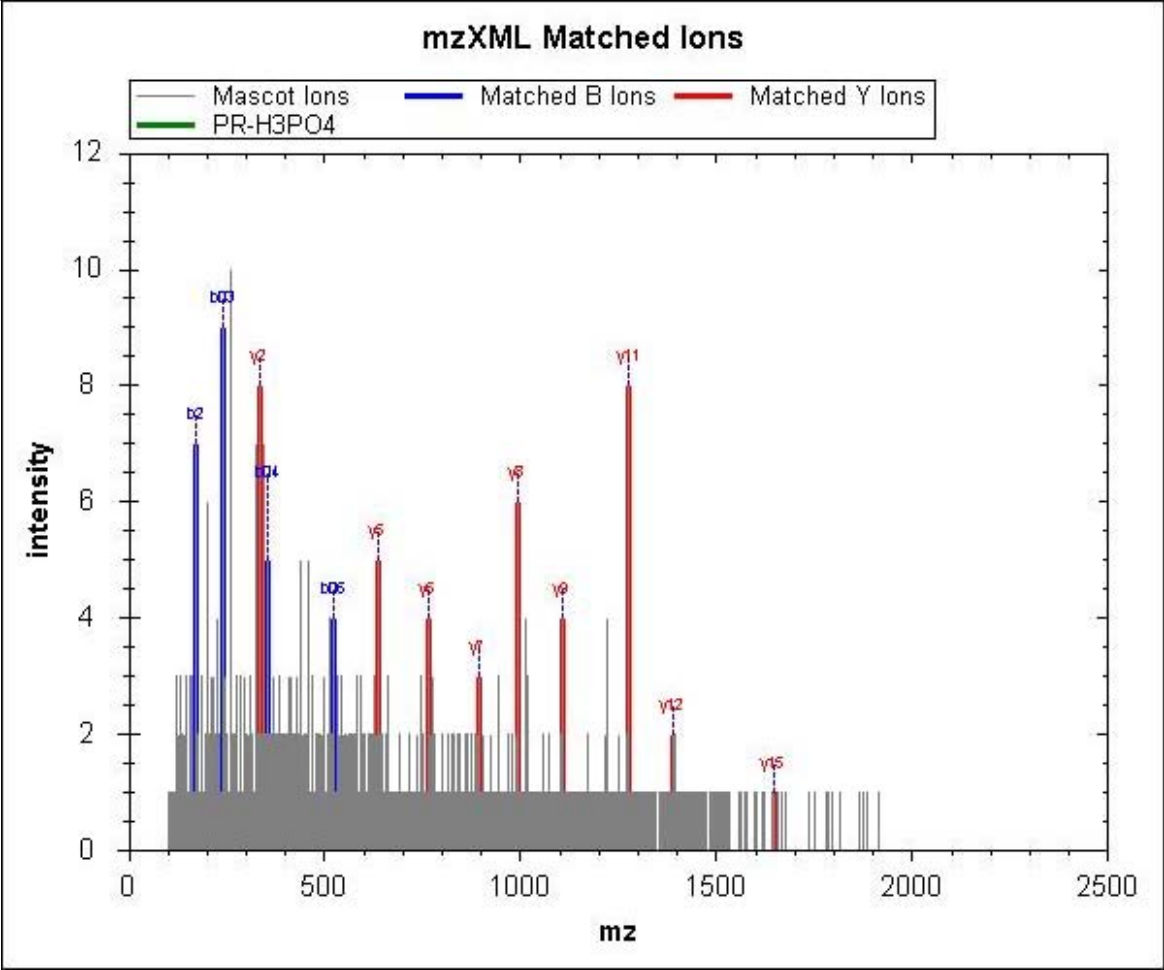

Protein index=661, ACC No:IP100005745

Peptide index=2095 MS/MS spectrum

Sequence: DHPALNYNIVSGPPSHK, m/z:615.975, charge:+ 3, Modification: , Mod Position:

Score: 44.68, Raw data:WET\_A3\_090615\_01.mzxml, MS/MS Elution time: 40.8135, Scan number:2149, Mass delta:-0.0137, Rank:1

| No | b       | b++    | b*      | b*++   | b0      | b0++   | Seq | y       | y++    | y*      | y*++   | y0      | y0++   | RevNo |
|----|---------|--------|---------|--------|---------|--------|-----|---------|--------|---------|--------|---------|--------|-------|
| 1  | 116.03  | 58.52  |         |        | 98.02   | 49.52  | D   |         |        |         |        |         |        | 17    |
| 2  | 253.09  | 127.05 |         |        | 235.08  | 118.04 | H   | 1730.9  | 865.95 | 1713.87 | 857.44 | 1712.89 | 856.95 | 16    |
| 3  | 350.15  | 175.58 |         |        | 332.14  | 166.57 | P   | 1593.84 | 797.42 | 1576.81 | 788.91 | 1575.83 | 788.42 | 15    |
| 4  | 421.18  | 211.1  |         |        | 403.17  | 202.09 | A   | 1496.79 | 748.9  | 1479.76 | 740.38 | 1478.78 | 739.89 | 14    |
| 5  | 534.27  | 267.64 |         |        | 516.26  | 258.63 | L   | 1425.75 | 713.38 | 1408.72 | 704.86 | 1407.74 | 704.37 | 13    |
| 6  | 648.31  | 324.66 | 631.28  | 316.15 | 630.3   | 315.65 | N   | 1312.66 | 656.84 | 1295.64 | 648.32 | 1294.65 | 647.83 | 12    |
| 7  | 811.37  | 406.19 | 794.35  | 397.68 | 793.36  | 397.18 | Y   | 1198.62 | 599.81 | 1181.59 | 591.3  | 1180.61 | 590.81 | 11    |
| 8  | 925.42  | 463.21 | 908.39  | 454.7  | 907.41  | 454.21 | N   | 1035.56 | 518.28 | 1018.53 | 509.77 | 1017.55 | 509.28 | 10    |
| 9  | 1038.5  | 519.75 | 1021.47 | 511.24 | 1020.49 | 510.75 | I   | 921.52  | 461.26 | 904.49  | 452.75 | 903.5   | 452.26 | 9     |
| 10 | 1137.57 | 569.29 | 1120.54 | 560.77 | 1119.56 | 560.28 | V   | 808.43  | 404.72 | 791.4   | 396.21 | 790.42  | 395.71 | 8     |
| 11 | 1224.6  | 612.8  | 1207.57 | 604.29 | 1206.59 | 603.8  | S   | 709.36  | 355.19 | 692.34  | 346.67 | 691.35  | 346.18 | 7     |
| 12 | 1281.62 | 641.31 | 1264.6  | 632.8  | 1263.61 | 632.31 | G   | 622.33  | 311.67 | 605.3   | 303.16 | 604.32  | 302.66 | 6     |
| 13 | 1378.67 | 689.84 | 1361.65 | 681.33 | 1360.66 | 680.84 | P   | 565.31  | 283.16 | 548.28  | 274.64 | 547.3   | 274.15 | 5     |
| 14 | 1475.73 | 738.37 | 1458.7  | 729.85 | 1457.72 | 729.36 | P   | 468.26  | 234.63 | 451.23  | 226.12 | 450.25  | 225.63 | 4     |
| 15 | 1562.76 | 781.88 | 1545.73 | 773.37 | 1544.75 | 772.88 | S   | 371.2   | 186.11 | 354.18  | 177.59 | 353.19  | 177.1  | 3     |
| 16 | 1699.82 | 850.41 | 1682.79 | 841.9  | 1681.81 | 841.41 | H   | 284.17  | 142.59 | 267.15  | 134.08 |         |        | 2     |
| 17 |         |        |         |        |         |        | K   | 147.11  | 74.06  | 130.09  | 65.55  |         |        | 1     |

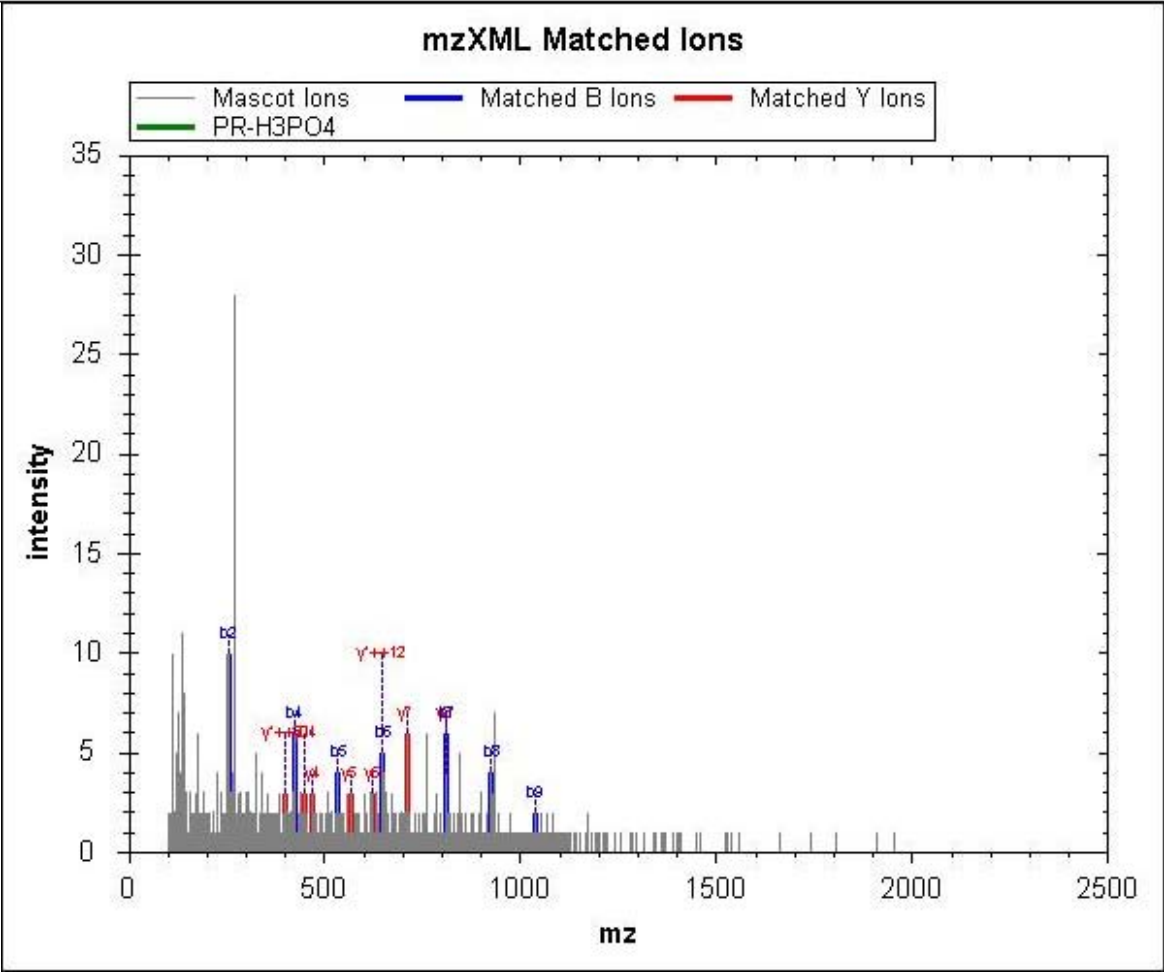

Protein index=662, ACC No:IPI00064193

Peptide index=4821 MS/MS spectrum

Sequence: VFFVYVGGESPLK, m/z:721.3888, charge:+ 2, Modification: , Mod Position:

Score: 62.42, Raw data:WET\_B3\_090616\_02.mzxml, MS/MS Elution time: 66.14783, Scan number:3632, Mass delta:-0.0077, Rank:1

| No | b       | b++    | b0      | b0++   | Seq | y       | y++    | y*      | y*++   | y0      | y0++   | RevNo |
|----|---------|--------|---------|--------|-----|---------|--------|---------|--------|---------|--------|-------|
| 1  | 100.08  | 50.54  |         |        | V   |         |        |         |        |         |        | 13    |
| 2  | 247.14  | 124.08 |         |        | F   | 1342.7  | 671.86 | 1325.68 | 663.34 | 1324.69 | 662.85 | 12    |
| 3  | 394.21  | 197.61 |         |        | F   | 1195.64 | 598.32 | 1178.61 | 589.81 | 1177.63 | 589.32 | 11    |
| 4  | 493.28  | 247.14 |         |        | V   | 1048.57 | 524.79 | 1031.54 | 516.27 | 1030.56 | 515.78 | 10    |
| 5  | 656.34  | 328.68 |         |        | Y   | 949.5   | 475.25 | 932.47  | 466.74 | 931.49  | 466.25 | 9     |
| 6  | 755.41  | 378.21 |         |        | V   | 786.44  | 393.72 | 769.41  | 385.21 | 768.43  | 384.72 | 8     |
| 7  | 812.43  | 406.72 |         |        | G   | 687.37  | 344.19 | 670.34  | 335.67 | 669.36  | 335.18 | 7     |
| 8  | 869.46  | 435.23 |         |        | G   | 630.35  | 315.68 | 613.32  | 307.16 | 612.34  | 306.67 | 6     |
| 9  | 998.5   | 499.75 | 980.49  | 490.75 | E   | 573.32  | 287.17 | 556.3   | 278.65 | 555.31  | 278.16 | 5     |
| 10 | 1085.53 | 543.27 | 1067.52 | 534.26 | S   | 444.28  | 222.64 | 427.26  | 214.13 | 426.27  | 213.64 | 4     |
| 11 | 1182.58 | 591.8  | 1164.57 | 582.79 | P   | 357.25  | 179.13 | 340.22  | 170.62 |         |        | 3     |
| 12 | 1295.67 | 648.34 | 1277.66 | 639.33 | L   | 260.2   | 130.6  | 243.17  | 122.09 |         |        | 2     |

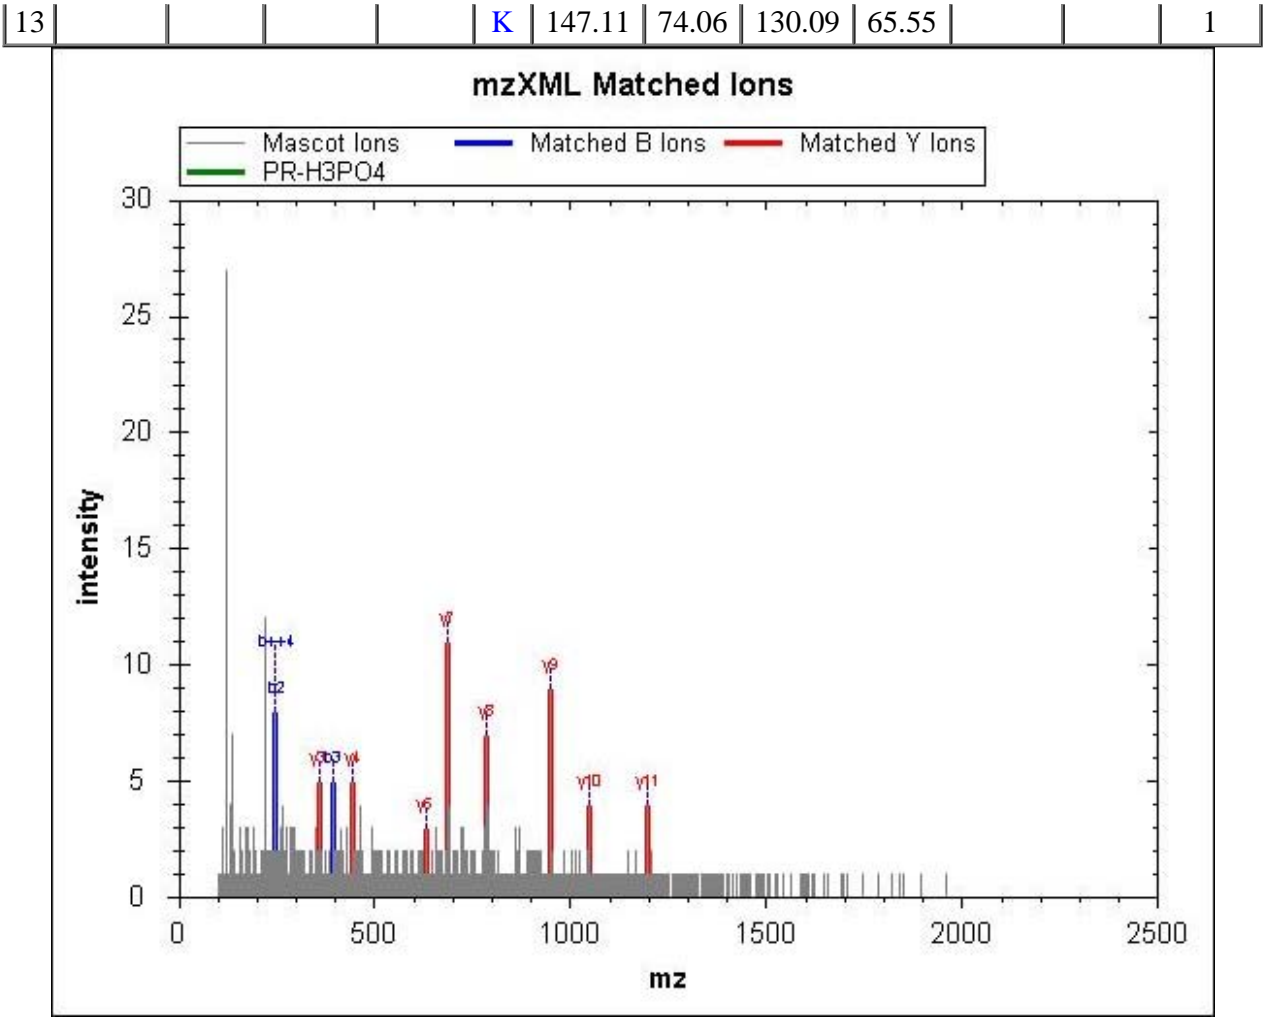

Protein index=663, ACC No:IP100550689

Peptide index=1591 MS/MS spectrum

Sequence: IASPEGQDYLK, m/z:610.8112, charge:+ 2, Modification: , Mod Position:

Score: 45.88, Raw data:WET\_A3\_090615\_02.mzxml, MS/MS Elution time: 35.16967, Scan number:1820, Mass delta:-0.0058, Rank:1

| No | b       | b++    | b*      | b*++   | b0     | b0++   | Seq | y       | y++    | y*      | y*++   | y0      | y0++   | RevNo |
|----|---------|--------|---------|--------|--------|--------|-----|---------|--------|---------|--------|---------|--------|-------|
| 1  | 114.09  | 57.55  |         |        |        |        | I   |         |        |         |        |         |        | 11    |
| 2  | 185.13  | 93.07  |         |        |        |        | A   | 1107.53 | 554.27 | 1090.51 | 545.76 | 1089.52 | 545.26 | 10    |
| 3  | 272.16  | 136.58 |         |        | 254.15 | 127.58 | S   | 1036.49 | 518.75 | 1019.47 | 510.24 | 1018.48 | 509.75 | 9     |
| 4  | 369.21  | 185.11 |         |        | 351.2  | 176.1  | P   | 949.46  | 475.23 | 932.44  | 466.72 | 931.45  | 466.23 | 8     |
| 5  | 498.26  | 249.63 |         |        | 480.25 | 240.63 | E   | 852.41  | 426.71 | 835.38  | 418.2  | 834.4   | 417.7  | 7     |
| 6  | 555.28  | 278.14 |         |        | 537.27 | 269.14 | G   | 723.37  | 362.19 | 706.34  | 353.67 | 705.36  | 353.18 | 6     |
| 7  | 683.34  | 342.17 | 666.31  | 333.66 | 665.33 | 333.17 | Q   | 666.35  | 333.68 | 649.32  | 325.16 | 648.34  | 324.67 | 5     |
| 8  | 798.36  | 399.69 | 781.34  | 391.17 | 780.35 | 390.68 | D   | 538.29  | 269.65 | 521.26  | 261.13 | 520.28  | 260.64 | 4     |
| 9  | 961.43  | 481.22 | 944.4   | 472.7  | 943.42 | 472.21 | Y   | 423.26  | 212.13 | 406.23  | 203.62 |         |        | 3     |
| 10 | 1074.51 | 537.76 | 1057.48 | 529.25 | 1056.5 | 528.75 | L   | 260.2   | 130.6  | 243.17  | 122.09 |         |        | 2     |
| 11 |         |        |         |        |        |        | K   | 147.11  | 74.06  | 130.09  | 65.55  |         |        | 1     |

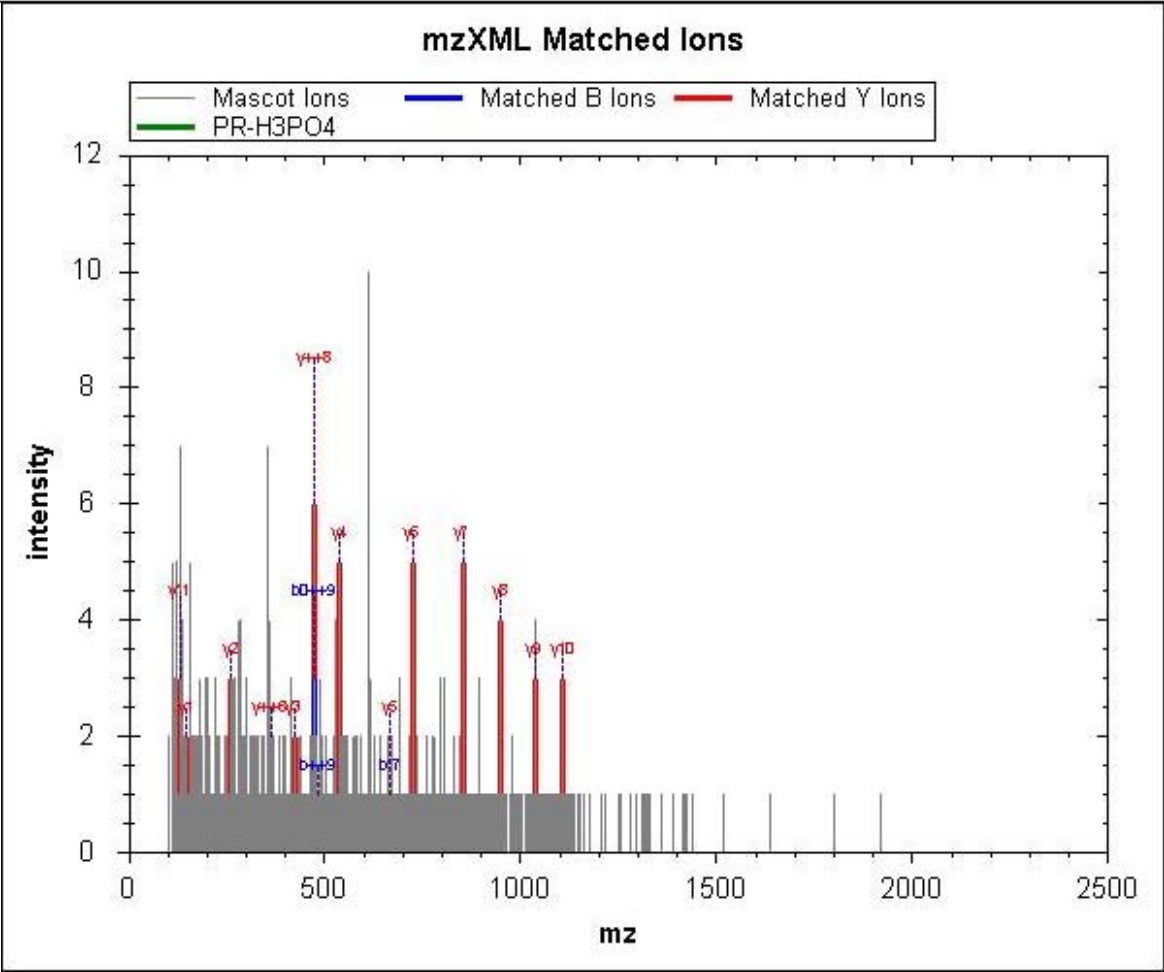

Protein index=665, ACC No:IPI00240909

Peptide index=7211 MS/MS spectrum

Sequence: IQDALSTVLQYAEDVLSGK, m/z:1025.544, charge:+ 2, Modification: , Mod Position:

Score: 102.89, Raw data:WET\_B3\_090616\_03.mzxml, MS/MS Elution time: 113.3005, Scan number:6427, Mass delta:0.0149, Rank:1

| No | b       | b++    | b*      | b*++   | b0      | b0++   | Seq | y       | y++    | y*      | y*++   | y0      | y0++   | RevNo |
|----|---------|--------|---------|--------|---------|--------|-----|---------|--------|---------|--------|---------|--------|-------|
| 1  | 114.09  | 57.55  |         |        |         |        | I   |         |        |         |        |         |        | 19    |
| 2  | 242.15  | 121.58 | 225.12  | 113.07 |         |        | Q   | 1936.99 | 969    | 1919.96 | 960.48 | 1918.98 | 959.99 | 18    |
| 3  | 357.18  | 179.09 | 340.15  | 170.58 | 339.17  | 170.09 | D   | 1808.93 | 904.97 | 1791.9  | 896.45 | 1790.92 | 895.96 | 17    |
| 4  | 428.21  | 214.61 | 411.19  | 206.1  | 410.2   | 205.61 | A   | 1693.9  | 847.45 | 1676.87 | 838.94 | 1675.89 | 838.45 | 16    |
| 5  | 541.3   | 271.15 | 524.27  | 262.64 | 523.29  | 262.15 | L   | 1622.86 | 811.94 | 1605.84 | 803.42 | 1604.85 | 802.93 | 15    |
| 6  | 628.33  | 314.67 | 611.3   | 306.16 | 610.32  | 305.66 | S   | 1509.78 | 755.39 | 1492.75 | 746.88 | 1491.77 | 746.39 | 14    |
| 7  | 729.38  | 365.19 | 712.35  | 356.68 | 711.37  | 356.19 | T   | 1422.75 | 711.88 | 1405.72 | 703.36 | 1404.74 | 702.87 | 13    |
| 8  | 828.45  | 414.73 | 811.42  | 406.21 | 810.44  | 405.72 | V   | 1321.7  | 661.35 | 1304.67 | 652.84 | 1303.69 | 652.35 | 12    |
| 9  | 941.53  | 471.27 | 924.5   | 462.76 | 923.52  | 462.26 | L   | 1222.63 | 611.82 | 1205.6  | 603.31 | 1204.62 | 602.81 | 11    |
| 10 | 1069.59 | 535.3  | 1052.56 | 526.78 | 1051.58 | 526.29 | Q   | 1109.55 | 555.28 | 1092.52 | 546.76 | 1091.54 | 546.27 | 10    |
| 11 | 1232.65 | 616.83 | 1215.63 | 608.32 | 1214.64 | 607.82 | Y   | 981.49  | 491.25 | 964.46  | 482.73 | 963.48  | 482.24 | 9     |
| 12 | 1303.69 | 652.35 | 1286.66 | 643.84 | 1285.68 | 643.34 | A   | 818.43  | 409.72 | 801.4   | 401.2  | 800.41  | 400.71 | 8     |

|    |         |        |         |        |         |        |   |        |        |        |        |        |        |   |
|----|---------|--------|---------|--------|---------|--------|---|--------|--------|--------|--------|--------|--------|---|
| 13 | 1432.73 | 716.87 | 1415.71 | 708.36 | 1414.72 | 707.86 | E | 747.39 | 374.2  | 730.36 | 365.68 | 729.38 | 365.19 | 7 |
| 14 | 1547.76 | 774.38 | 1530.73 | 765.87 | 1529.75 | 765.38 | D | 618.35 | 309.68 | 601.32 | 301.16 | 600.34 | 300.67 | 6 |
| 15 | 1646.83 | 823.92 | 1629.8  | 815.4  | 1628.82 | 814.91 | V | 503.32 | 252.16 | 486.29 | 243.65 | 485.31 | 243.16 | 5 |
| 16 | 1759.91 | 880.46 | 1742.88 | 871.95 | 1741.9  | 871.45 | L | 404.25 | 202.63 | 387.22 | 194.12 | 386.24 | 193.62 | 4 |
| 17 | 1846.94 | 923.98 | 1829.92 | 915.46 | 1828.93 | 914.97 | S | 291.17 | 146.09 | 274.14 | 137.57 | 273.16 | 137.08 | 3 |
| 18 | 1903.96 | 952.49 | 1886.94 | 943.97 | 1885.95 | 943.48 | G | 204.13 | 102.57 | 187.11 | 94.06  |        |        | 2 |
| 19 |         |        |         |        |         |        | K | 147.11 | 74.06  | 130.09 | 65.55  |        |        | 1 |

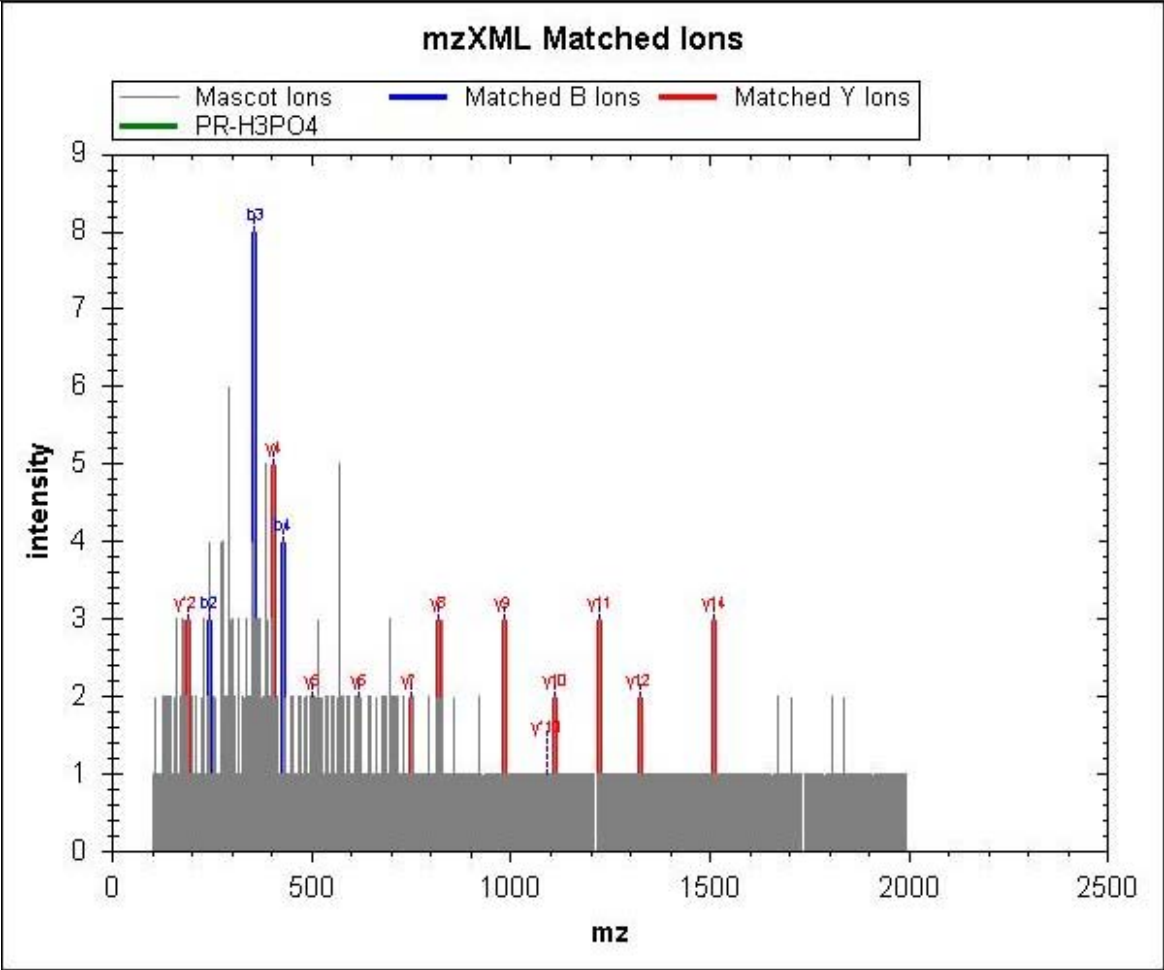

Protein index=666, ACC No:IPI00156032

Peptide index=5823 MS/MS spectrum

Sequence: GLLEESSFATLFPK, m/z:769.9076, charge:+ 2, Modification: , Mod Position:

Score: 53.81, Raw data:WET\_B3\_090616\_03.mzxml, MS/MS Elution time: 78.4535, Scan number:4348, Mass delta:-0.0004, Rank:1

| No | b      | b++    | b0     | b0++   | Seq | y       | y++    | y*      | y*++   | y0      | y0++   | RevNo |
|----|--------|--------|--------|--------|-----|---------|--------|---------|--------|---------|--------|-------|
| 1  | 58.03  | 29.52  |        |        | G   |         |        |         |        |         |        | 14    |
| 2  | 171.11 | 86.06  |        |        | L   | 1481.79 | 741.4  | 1464.76 | 732.88 | 1463.78 | 732.39 | 13    |
| 3  | 284.2  | 142.6  |        |        | L   | 1368.7  | 684.86 | 1351.68 | 676.34 | 1350.69 | 675.85 | 12    |
| 4  | 413.24 | 207.12 | 395.23 | 198.12 | E   | 1255.62 | 628.31 | 1238.59 | 619.8  | 1237.61 | 619.31 | 11    |
| 5  | 542.28 | 271.64 | 524.27 | 262.64 | E   | 1126.58 | 563.79 | 1109.55 | 555.28 | 1108.57 | 554.79 | 10    |



|    |        |        |        |        |        |        |   |        |        |        |        |        |        |   |
|----|--------|--------|--------|--------|--------|--------|---|--------|--------|--------|--------|--------|--------|---|
| 4  | 444.21 | 222.61 | 427.18 | 214.09 | 426.2  | 213.6  | E | 837.45 | 419.23 | 820.42 | 410.71 | 819.44 | 410.22 | 7 |
| 5  | 515.25 | 258.13 | 498.22 | 249.61 | 497.24 | 249.12 | A | 708.4  | 354.71 | 691.38 | 346.19 | 690.39 | 345.7  | 6 |
| 6  | 628.33 | 314.67 | 611.3  | 306.16 | 610.32 | 305.66 | L | 637.37 | 319.19 | 620.34 | 310.67 | 619.36 | 310.18 | 5 |
| 7  | 775.4  | 388.2  | 758.37 | 379.69 | 757.39 | 379.2  | F | 524.28 | 262.64 | 507.26 | 254.13 | 506.27 | 253.64 | 4 |
| 8  | 876.45 | 438.73 | 859.42 | 430.21 | 858.44 | 429.72 | T | 377.21 | 189.11 | 360.19 | 180.6  | 359.2  | 180.11 | 3 |
| 9  | 977.49 | 489.25 | 960.47 | 480.74 | 959.48 | 480.25 | T | 276.17 | 138.59 | 259.14 | 130.07 | 258.16 | 129.58 | 2 |
| 10 |        |        |        |        |        |        | R | 175.12 | 88.06  | 158.09 | 79.55  |        |        | 1 |

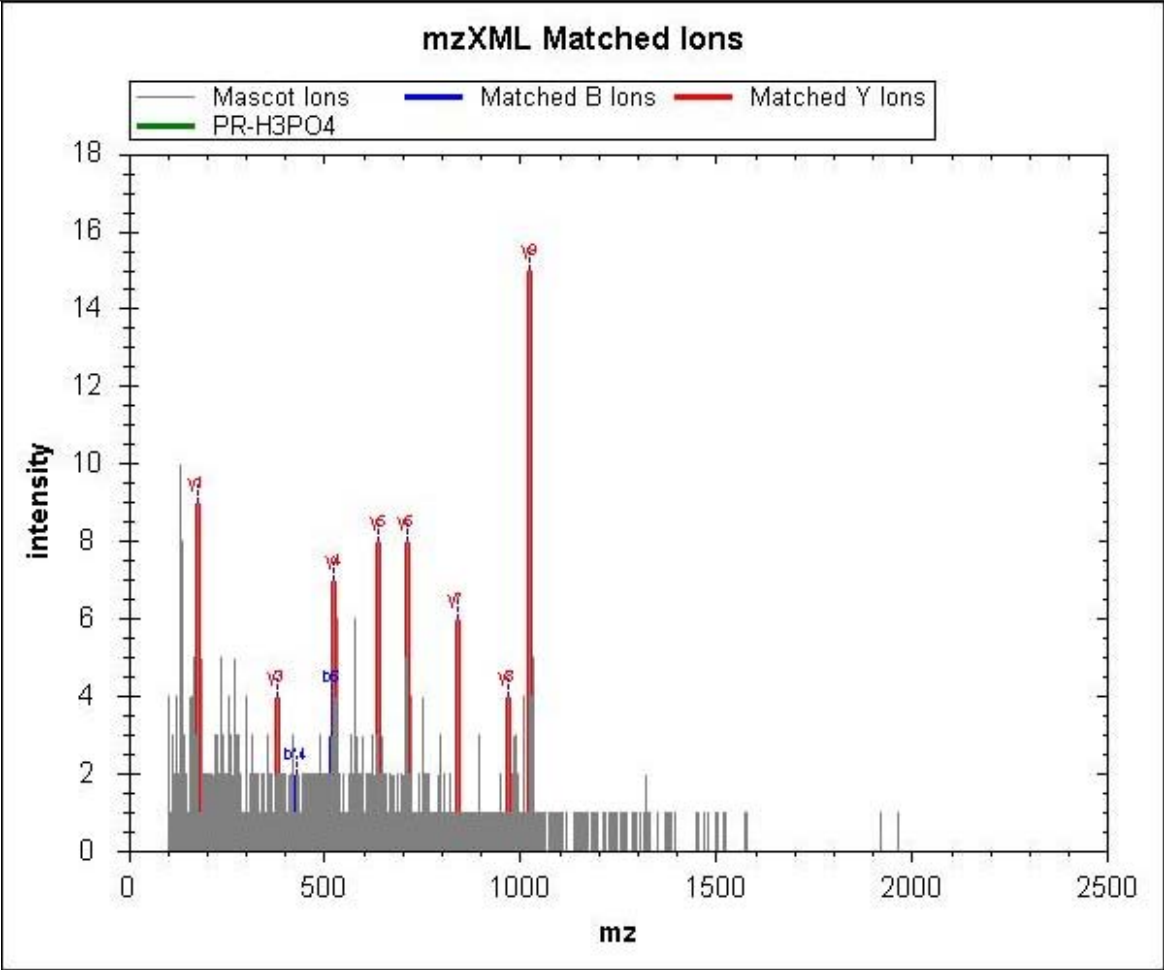

Protein index=671, ACC No:IPI00005717

Peptide index=7032 MS/MS spectrum

Sequence: AAGLGELGAALLQLVR, m/z:776.4647, charge:+ 2, Modification: , Mod Position:

Score: 43.47, Raw data:WET\_A3\_090615\_02.mzxml, MS/MS Elution time: 104.2927, Scan number:5843, Mass delta:-0.0008, Rank:1

| No | b      | b++    | b* | b*++ | b0 | b0++ | Seq | y       | y++    | y*      | y*++   | y0      | y0++   | RevNo |
|----|--------|--------|----|------|----|------|-----|---------|--------|---------|--------|---------|--------|-------|
| 1  | 72.04  | 36.53  |    |      |    |      | A   |         |        |         |        |         |        | 16    |
| 2  | 143.08 | 72.04  |    |      |    |      | A   | 1480.88 | 740.95 | 1463.86 | 732.43 | 1462.87 | 731.94 | 15    |
| 3  | 200.1  | 100.56 |    |      |    |      | G   | 1409.85 | 705.43 | 1392.82 | 696.91 | 1391.84 | 696.42 | 14    |
| 4  | 313.19 | 157.1  |    |      |    |      | L   | 1352.83 | 676.92 | 1335.8  | 668.4  | 1334.82 | 667.91 | 13    |
| 5  | 370.21 | 185.61 |    |      |    |      | G   | 1239.74 | 620.37 | 1222.72 | 611.86 | 1221.73 | 611.37 | 12    |

|    |         |        |         |        |         |        |   |         |        |         |        |         |        |    |
|----|---------|--------|---------|--------|---------|--------|---|---------|--------|---------|--------|---------|--------|----|
| 6  | 499.25  | 250.13 |         |        | 481.24  | 241.12 | E | 1182.72 | 591.86 | 1165.69 | 583.35 | 1164.71 | 582.86 | 11 |
| 7  | 612.34  | 306.67 |         |        | 594.32  | 297.67 | L | 1053.68 | 527.34 | 1036.65 | 518.83 |         |        | 10 |
| 8  | 669.36  | 335.18 |         |        | 651.35  | 326.18 | G | 940.59  | 470.8  | 923.57  | 462.29 |         |        | 9  |
| 9  | 740.39  | 370.7  |         |        | 722.38  | 361.7  | A | 883.57  | 442.29 | 866.55  | 433.78 |         |        | 8  |
| 10 | 811.43  | 406.22 |         |        | 793.42  | 397.21 | A | 812.54  | 406.77 | 795.51  | 398.26 |         |        | 7  |
| 11 | 924.51  | 462.76 |         |        | 906.5   | 453.76 | L | 741.5   | 371.25 | 724.47  | 362.74 |         |        | 6  |
| 12 | 1037.6  | 519.3  |         |        | 1019.59 | 510.3  | L | 628.41  | 314.71 | 611.39  | 306.2  |         |        | 5  |
| 13 | 1165.66 | 583.33 | 1148.63 | 574.82 | 1147.65 | 574.33 | Q | 515.33  | 258.17 | 498.3   | 249.66 |         |        | 4  |
| 14 | 1278.74 | 639.87 | 1261.72 | 631.36 | 1260.73 | 630.87 | L | 387.27  | 194.14 | 370.24  | 185.63 |         |        | 3  |
| 15 | 1377.81 | 689.41 | 1360.78 | 680.9  | 1359.8  | 680.4  | V | 274.19  | 137.6  | 257.16  | 129.08 |         |        | 2  |
| 16 |         |        |         |        |         |        | R | 175.12  | 88.06  | 158.09  | 79.55  |         |        | 1  |

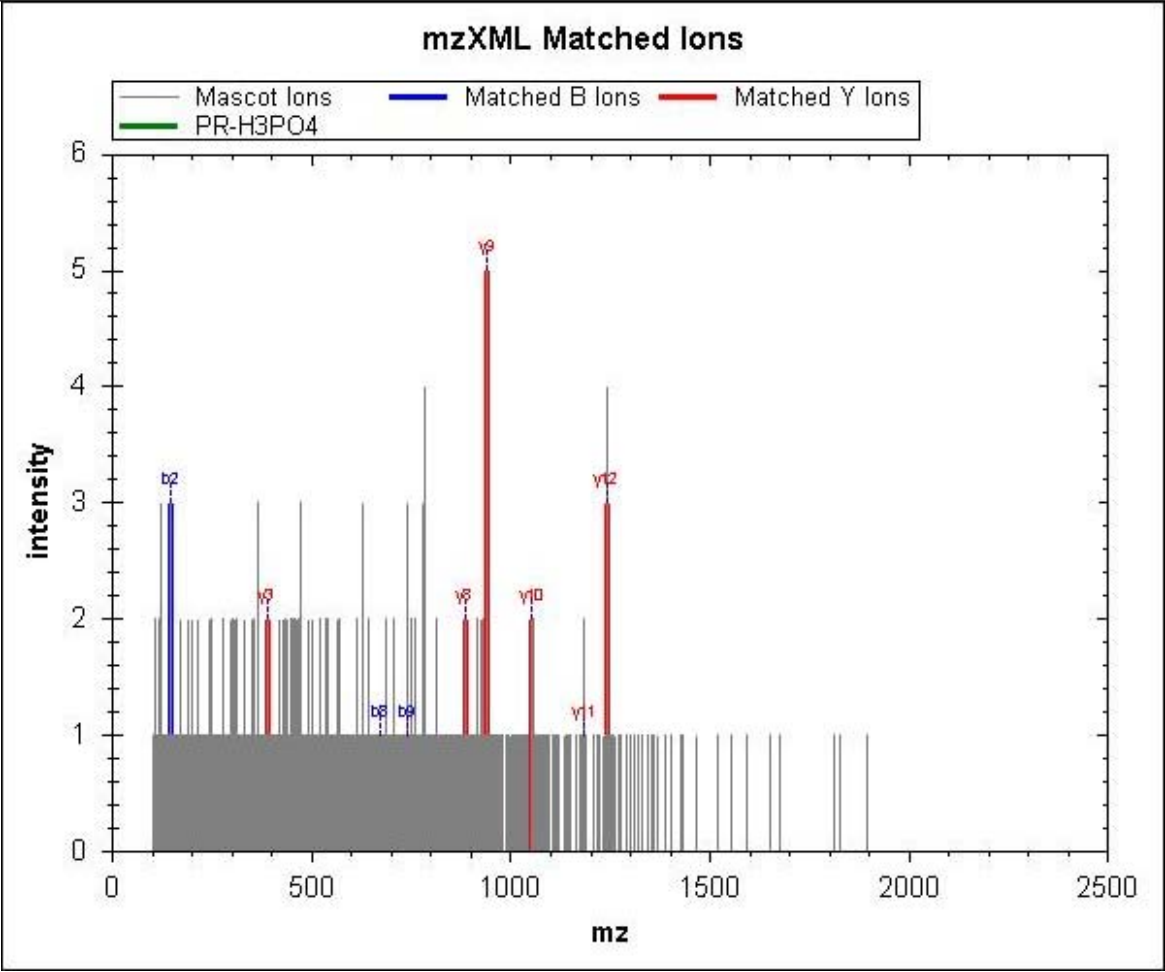

Protein index=672, ACC No:IPI00021888

Peptide index=6973 MS/MS spectrum

Sequence: VSGYLNLAADLAHNFTDGLAIGASFR, m/z:898.4611, charge:+ 3, Modification: , Mod Position:

Score: 57.98, Raw data:WET\_B3\_090616\_03.mzxml, MS/MS Elution time: 102.8212, Scan number:5776, Mass delta:0.0017, Rank:1

| No | b | b++ | b* | b*++ | b0 | b0++ | Seq | y | y++ | y* | y*++ | y0 | y0++ | RevNo |
|----|---|-----|----|------|----|------|-----|---|-----|----|------|----|------|-------|
|    |   |     |    |      |    |      |     |   |     |    |      |    |      |       |

|    |         |         |         |         |         |         |   |         |         |         |         |         |         |    |
|----|---------|---------|---------|---------|---------|---------|---|---------|---------|---------|---------|---------|---------|----|
| 1  | 100.08  | 50.54   |         |         |         |         | V |         |         |         |         |         |         | 26 |
| 2  | 187.11  | 94.06   |         |         | 169.1   | 85.05   | S | 2594.3  | 1297.65 | 2577.27 | 1289.14 | 2576.29 | 1288.65 | 25 |
| 3  | 244.13  | 122.57  |         |         | 226.12  | 113.56  | G | 2507.27 | 1254.14 | 2490.24 | 1245.62 | 2489.26 | 1245.13 | 24 |
| 4  | 407.19  | 204.1   |         |         | 389.18  | 195.09  | Y | 2450.25 | 1225.63 | 2433.22 | 1217.11 | 2432.24 | 1216.62 | 23 |
| 5  | 520.28  | 260.64  |         |         | 502.27  | 251.64  | L | 2287.18 | 1144.1  | 2270.16 | 1135.58 | 2269.17 | 1135.09 | 22 |
| 6  | 634.32  | 317.66  | 617.29  | 309.15  | 616.31  | 308.66  | N | 2174.1  | 1087.55 | 2157.07 | 1079.04 | 2156.09 | 1078.55 | 21 |
| 7  | 747.4   | 374.21  | 730.38  | 365.69  | 729.39  | 365.2   | L | 2060.06 | 1030.53 | 2043.03 | 1022.02 | 2042.05 | 1021.53 | 20 |
| 8  | 818.44  | 409.72  | 801.41  | 401.21  | 800.43  | 400.72  | A | 1946.97 | 973.99  | 1929.95 | 965.48  | 1928.96 | 964.98  | 19 |
| 9  | 889.48  | 445.24  | 872.45  | 436.73  | 871.47  | 436.24  | A | 1875.93 | 938.47  | 1858.91 | 929.96  | 1857.92 | 929.47  | 18 |
| 10 | 1004.5  | 502.76  | 987.48  | 494.24  | 986.49  | 493.75  | D | 1804.9  | 902.95  | 1787.87 | 894.44  | 1786.89 | 893.95  | 17 |
| 11 | 1117.59 | 559.3   | 1100.56 | 550.78  | 1099.58 | 550.29  | L | 1689.87 | 845.44  | 1672.84 | 836.93  | 1671.86 | 836.43  | 16 |
| 12 | 1188.63 | 594.82  | 1171.6  | 586.3   | 1170.62 | 585.81  | A | 1576.79 | 788.9   | 1559.76 | 780.38  | 1558.78 | 779.89  | 15 |
| 13 | 1325.68 | 663.35  | 1308.66 | 654.83  | 1307.67 | 654.34  | H | 1505.75 | 753.38  | 1488.72 | 744.87  | 1487.74 | 744.37  | 14 |
| 14 | 1439.73 | 720.37  | 1422.7  | 711.85  | 1421.72 | 711.36  | N | 1368.69 | 684.85  | 1351.66 | 676.34  | 1350.68 | 675.84  | 13 |
| 15 | 1586.8  | 793.9   | 1569.77 | 785.39  | 1568.79 | 784.9   | F | 1254.65 | 627.83  | 1237.62 | 619.31  | 1236.64 | 618.82  | 12 |
| 16 | 1687.84 | 844.43  | 1670.82 | 835.91  | 1669.83 | 835.42  | T | 1107.58 | 554.29  | 1090.55 | 545.78  | 1089.57 | 545.29  | 11 |
| 17 | 1802.87 | 901.94  | 1785.84 | 893.43  | 1784.86 | 892.93  | D | 1006.53 | 503.77  | 989.51  | 495.26  | 988.52  | 494.76  | 10 |
| 18 | 1859.89 | 930.45  | 1842.87 | 921.94  | 1841.88 | 921.44  | G | 891.5   | 446.26  | 874.48  | 437.74  | 873.49  | 437.25  | 9  |
| 19 | 1972.98 | 986.99  | 1955.95 | 978.48  | 1954.97 | 977.99  | L | 834.48  | 417.75  | 817.46  | 409.23  | 816.47  | 408.74  | 8  |
| 20 | 2044.01 | 1022.51 | 2026.99 | 1014    | 2026    | 1013.51 | A | 721.4   | 361.2   | 704.37  | 352.69  | 703.39  | 352.2   | 7  |
| 21 | 2157.1  | 1079.05 | 2140.07 | 1070.54 | 2139.09 | 1070.05 | I | 650.36  | 325.68  | 633.34  | 317.17  | 632.35  | 316.68  | 6  |
| 22 | 2214.12 | 1107.56 | 2197.09 | 1099.05 | 2196.11 | 1098.56 | G | 537.28  | 269.14  | 520.25  | 260.63  | 519.27  | 260.14  | 5  |
| 23 | 2285.16 | 1143.08 | 2268.13 | 1134.57 | 2267.15 | 1134.08 | A | 480.26  | 240.63  | 463.23  | 232.12  | 462.25  | 231.63  | 4  |
| 24 | 2372.19 | 1186.6  | 2355.16 | 1178.08 | 2354.18 | 1177.59 | S | 409.22  | 205.11  | 392.19  | 196.6   | 391.21  | 196.11  | 3  |
| 25 | 2519.26 | 1260.13 | 2502.23 | 1251.62 | 2501.25 | 1251.13 | F | 322.19  | 161.6   | 305.16  | 153.08  |         |         | 2  |
| 26 |         |         |         |         |         |         | R | 175.12  | 88.06   | 158.09  | 79.55   |         |         | 1  |

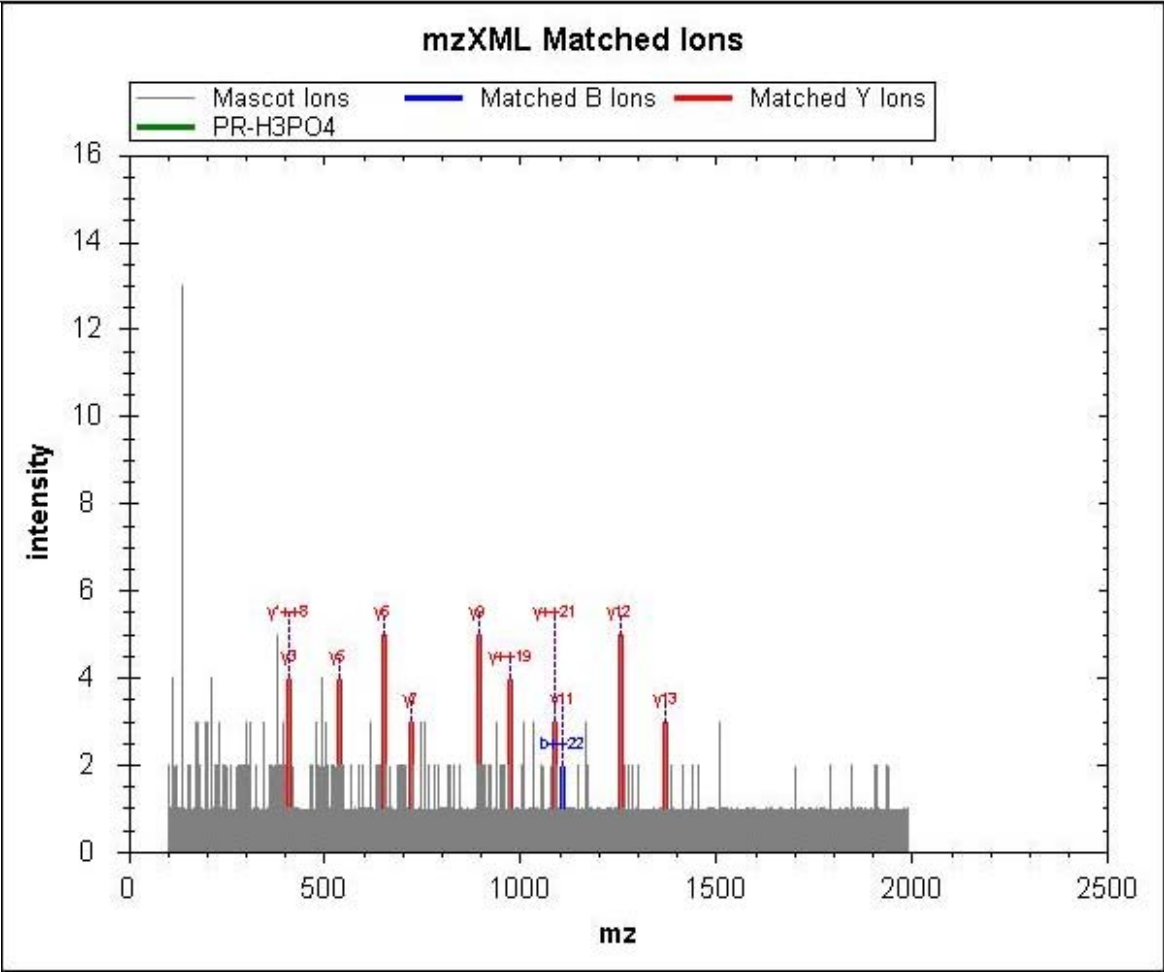

Protein index=676, ACC No:IPI00019353

Peptide index=6117 MS/MS spectrum

Sequence: IPIGFIPLGETSSLSHTLFAESGNK, m/z:872.4582, charge:+ 3, Modification: , Mod Position:  
Score: 86.53, Raw data:WET\_B3\_090616\_01.mzxml, MS/MS Elution time: 82.77817, Scan number:4574, Mass delta:-0.0143, Rank:1

| No | b       | b++    | b* | b*++ | b0      | b0++   | Seq | y       | y++     | y*      | y*++    | y0      | y0++    | RevNo |
|----|---------|--------|----|------|---------|--------|-----|---------|---------|---------|---------|---------|---------|-------|
| 1  | 114.09  | 57.55  |    |      |         |        | I   |         |         |         |         |         |         | 25    |
| 2  | 211.14  | 106.08 |    |      |         |        | P   | 2502.29 | 1251.65 | 2485.26 | 1243.13 | 2484.28 | 1242.64 | 24    |
| 3  | 324.23  | 162.62 |    |      |         |        | I   | 2405.23 | 1203.12 | 2388.21 | 1194.61 | 2387.22 | 1194.12 | 23    |
| 4  | 381.25  | 191.13 |    |      |         |        | G   | 2292.15 | 1146.58 | 2275.12 | 1138.07 | 2274.14 | 1137.57 | 22    |
| 5  | 528.32  | 264.66 |    |      |         |        | F   | 2235.13 | 1118.07 | 2218.1  | 1109.55 | 2217.12 | 1109.06 | 21    |
| 6  | 641.4   | 321.2  |    |      |         |        | I   | 2088.06 | 1044.53 | 2071.03 | 1036.02 | 2070.05 | 1035.53 | 20    |
| 7  | 738.45  | 369.73 |    |      |         |        | P   | 1974.98 | 987.99  | 1957.95 | 979.48  | 1956.97 | 978.99  | 19    |
| 8  | 851.54  | 426.27 |    |      |         |        | L   | 1877.92 | 939.47  | 1860.9  | 930.95  | 1859.91 | 930.46  | 18    |
| 9  | 908.56  | 454.78 |    |      |         |        | G   | 1764.84 | 882.92  | 1747.81 | 874.41  | 1746.83 | 873.92  | 17    |
| 10 | 1037.6  | 519.31 |    |      | 1019.59 | 510.3  | E   | 1707.82 | 854.41  | 1690.79 | 845.9   | 1689.81 | 845.41  | 16    |
| 11 | 1138.65 | 569.83 |    |      | 1120.64 | 560.82 | T   | 1578.78 | 789.89  | 1561.75 | 781.38  | 1560.77 | 780.89  | 15    |
| 12 | 1225.68 | 613.35 |    |      | 1207.67 | 604.34 | S   | 1477.73 | 739.37  | 1460.7  | 730.85  | 1459.72 | 730.36  | 14    |

|    |         |         |         |         |         |         |   |         |        |         |        |         |        |    |
|----|---------|---------|---------|---------|---------|---------|---|---------|--------|---------|--------|---------|--------|----|
| 13 | 1312.71 | 656.86  |         |         | 1294.7  | 647.86  | S | 1390.7  | 695.85 | 1373.67 | 687.34 | 1372.69 | 686.85 | 13 |
| 14 | 1425.8  | 713.4   |         |         | 1407.79 | 704.4   | L | 1303.66 | 652.34 | 1286.64 | 643.82 | 1285.65 | 643.33 | 12 |
| 15 | 1512.83 | 756.92  |         |         | 1494.82 | 747.91  | S | 1190.58 | 595.79 | 1173.55 | 587.28 | 1172.57 | 586.79 | 11 |
| 16 | 1649.89 | 825.45  |         |         | 1631.88 | 816.44  | H | 1103.55 | 552.28 | 1086.52 | 543.76 | 1085.54 | 543.27 | 10 |
| 17 | 1750.94 | 875.97  |         |         | 1732.93 | 866.97  | T | 966.49  | 483.75 | 949.46  | 475.23 | 948.48  | 474.74 | 9  |
| 18 | 1864.02 | 932.51  |         |         | 1846.01 | 923.51  | L | 865.44  | 433.22 | 848.41  | 424.71 | 847.43  | 424.22 | 8  |
| 19 | 2011.09 | 1006.05 |         |         | 1993.08 | 997.04  | F | 752.36  | 376.68 | 735.33  | 368.17 | 734.35  | 367.68 | 7  |
| 20 | 2082.13 | 1041.57 |         |         | 2064.12 | 1032.56 | A | 605.29  | 303.15 | 588.26  | 294.63 | 587.28  | 294.14 | 6  |
| 21 | 2211.17 | 1106.09 |         |         | 2193.16 | 1097.08 | E | 534.25  | 267.63 | 517.23  | 259.12 | 516.24  | 258.62 | 5  |
| 22 | 2298.2  | 1149.6  |         |         | 2280.19 | 1140.6  | S | 405.21  | 203.11 | 388.18  | 194.59 | 387.2   | 194.1  | 4  |
| 23 | 2355.22 | 1178.12 |         |         | 2337.21 | 1169.11 | G | 318.18  | 159.59 | 301.15  | 151.08 |         |        | 3  |
| 24 | 2469.27 | 1235.14 | 2452.24 | 1226.62 | 2451.26 | 1226.13 | N | 261.16  | 131.08 | 244.13  | 122.57 |         |        | 2  |
| 25 |         |         |         |         |         |         | K | 147.11  | 74.06  | 130.09  | 65.55  |         |        | 1  |

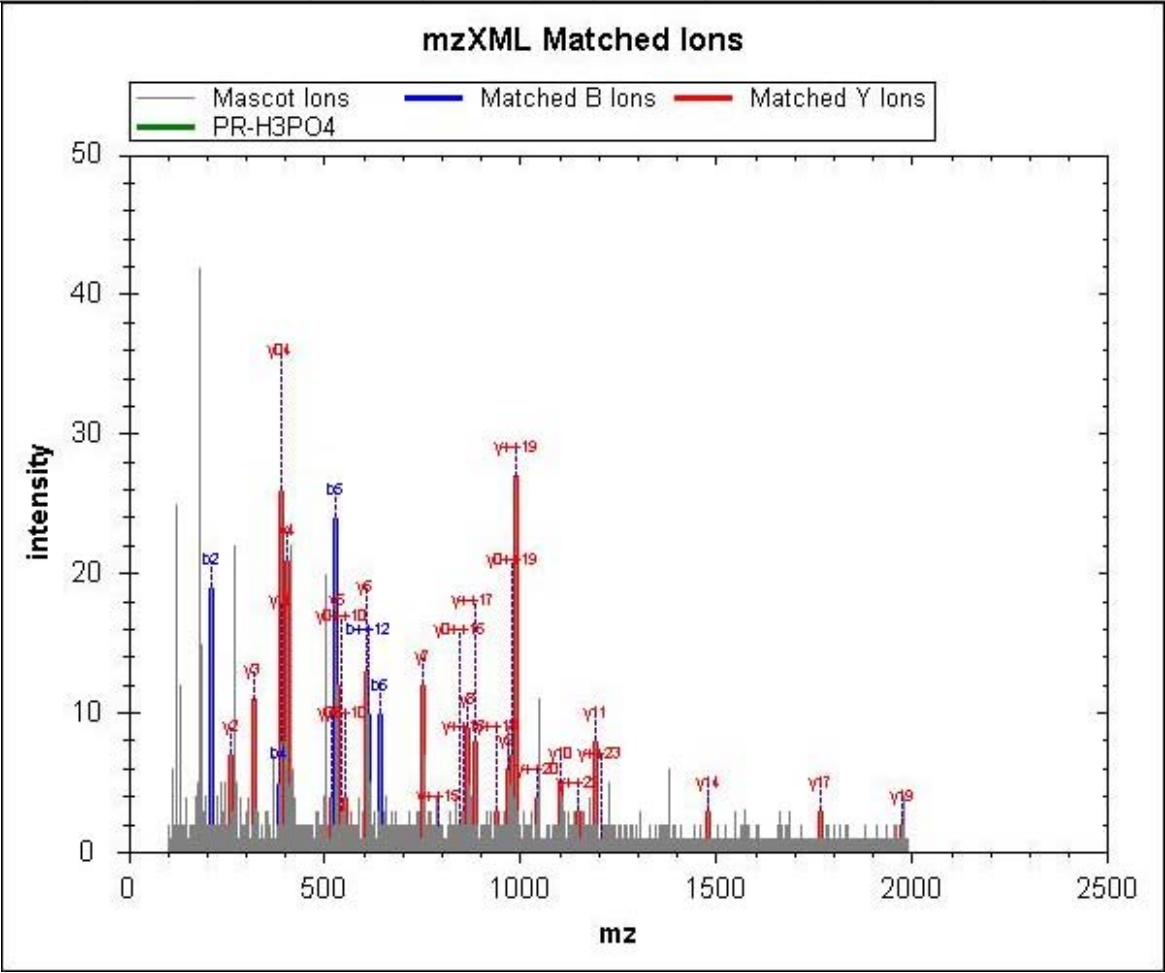

Protein index=677, ACC No:IP100180675

Peptide index=6130 MS/MS spectrum

Sequence: LIGQIVSSITASLR, m/z:729.4376, charge:+ 2, Modification: , Mod Position:

Score: 79.2, Raw data:WET\_A3\_090615\_02.mzxml, MS/MS Elution time: 82.9155, Scan number:4593, Mass delta:-0.0136, Rank:1

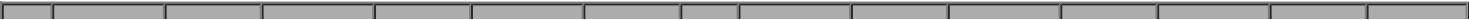

| No | b       | b++    | b*      | b*++   | b0      | b0++   | Seq | y       | y++    | y*      | y*++   | y0      | y0++   | RevNo |
|----|---------|--------|---------|--------|---------|--------|-----|---------|--------|---------|--------|---------|--------|-------|
| 1  | 114.09  | 57.55  |         |        |         |        | L   |         |        |         |        |         |        | 14    |
| 2  | 227.18  | 114.09 |         |        |         |        | I   | 1344.78 | 672.9  | 1327.76 | 664.38 | 1326.77 | 663.89 | 13    |
| 3  | 284.2   | 142.6  |         |        |         |        | G   | 1231.7  | 616.35 | 1214.67 | 607.84 | 1213.69 | 607.35 | 12    |
| 4  | 412.26  | 206.63 | 395.23  | 198.12 |         |        | Q   | 1174.68 | 587.84 | 1157.65 | 579.33 | 1156.67 | 578.84 | 11    |
| 5  | 525.34  | 263.17 | 508.31  | 254.66 |         |        | I   | 1046.62 | 523.81 | 1029.59 | 515.3  | 1028.61 | 514.81 | 10    |
| 6  | 624.41  | 312.71 | 607.38  | 304.19 |         |        | V   | 933.54  | 467.27 | 916.51  | 458.76 | 915.53  | 458.27 | 9     |
| 7  | 711.44  | 356.22 | 694.41  | 347.71 | 693.43  | 347.22 | S   | 834.47  | 417.74 | 817.44  | 409.22 | 816.46  | 408.73 | 8     |
| 8  | 798.47  | 399.74 | 781.45  | 391.23 | 780.46  | 390.73 | S   | 747.44  | 374.22 | 730.41  | 365.71 | 729.43  | 365.22 | 7     |
| 9  | 911.56  | 456.28 | 894.53  | 447.77 | 893.55  | 447.28 | I   | 660.4   | 330.71 | 643.38  | 322.19 | 642.39  | 321.7  | 6     |
| 10 | 1012.6  | 506.81 | 995.58  | 498.29 | 994.59  | 497.8  | T   | 547.32  | 274.16 | 530.29  | 265.65 | 529.31  | 265.16 | 5     |
| 11 | 1083.64 | 542.32 | 1066.61 | 533.81 | 1065.63 | 533.32 | A   | 446.27  | 223.64 | 429.25  | 215.13 | 428.26  | 214.63 | 4     |
| 12 | 1170.67 | 585.84 | 1153.65 | 577.33 | 1152.66 | 576.83 | S   | 375.24  | 188.12 | 358.21  | 179.61 | 357.22  | 179.12 | 3     |
| 13 | 1283.76 | 642.38 | 1266.73 | 633.87 | 1265.75 | 633.38 | L   | 288.2   | 144.61 | 271.18  | 136.09 |         |        | 2     |
| 14 |         |        |         |        |         |        | R   | 175.12  | 88.06  | 158.09  | 79.55  |         |        | 1     |

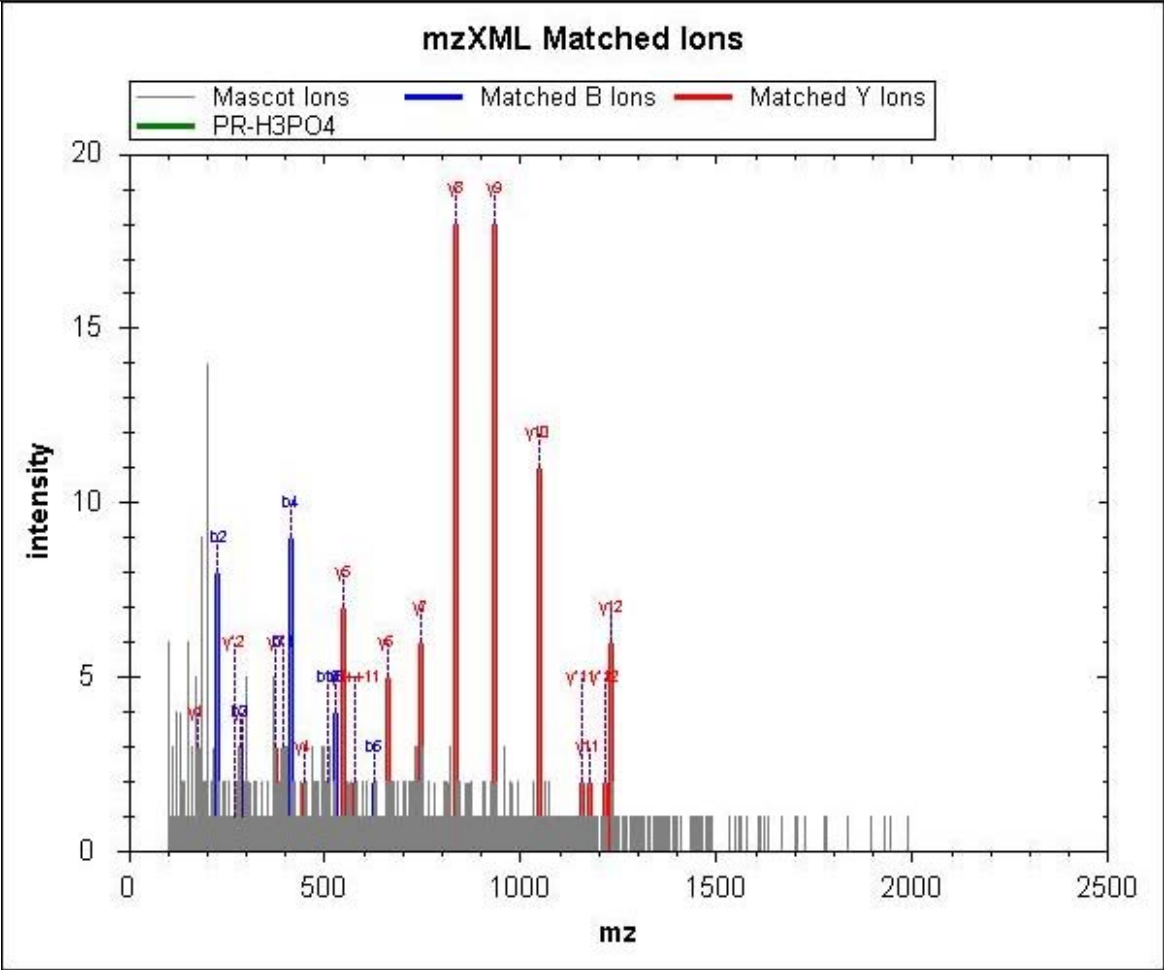

Protein index=678, ACC No:IPI00009923

Peptide index=6230 MS/MS spectrum

Sequence: LNTEWSELENLVLK, m/z:844.4491, charge:+ 2, Modification: , Mod Position:

Score: 60.16, Raw data:WET\_B3\_090616\_03.mzxml, MS/MS Elution time: 84.59617, Scan number:4708,

Mass delta:-0.0056, Rank:1

| No | b       | b++    | b*      | b*++   | b0      | b0++   | Seq | y       | y++    | y*      | y*++   | y0      | y0++   | RevNo |
|----|---------|--------|---------|--------|---------|--------|-----|---------|--------|---------|--------|---------|--------|-------|
| 1  | 114.09  | 57.55  |         |        |         |        | L   |         |        |         |        |         |        | 14    |
| 2  | 228.13  | 114.57 | 211.11  | 106.06 |         |        | N   | 1574.81 | 787.91 | 1557.78 | 779.39 | 1556.8  | 778.9  | 13    |
| 3  | 329.18  | 165.09 | 312.16  | 156.58 | 311.17  | 156.09 | T   | 1460.76 | 730.89 | 1443.74 | 722.37 | 1442.75 | 721.88 | 12    |
| 4  | 458.22  | 229.62 | 441.2   | 221.1  | 440.21  | 220.61 | E   | 1359.72 | 680.36 | 1342.69 | 671.85 | 1341.7  | 671.36 | 11    |
| 5  | 644.3   | 322.66 | 627.28  | 314.14 | 626.29  | 313.65 | W   | 1230.67 | 615.84 | 1213.65 | 607.33 | 1212.66 | 606.83 | 10    |
| 6  | 731.34  | 366.17 | 714.31  | 357.66 | 713.33  | 357.17 | S   | 1044.59 | 522.8  | 1027.57 | 514.29 | 1026.58 | 513.8  | 9     |
| 7  | 860.38  | 430.69 | 843.35  | 422.18 | 842.37  | 421.69 | E   | 957.56  | 479.28 | 940.53  | 470.77 | 939.55  | 470.28 | 8     |
| 8  | 973.46  | 487.23 | 956.44  | 478.72 | 955.45  | 478.23 | L   | 828.52  | 414.76 | 811.49  | 406.25 | 810.51  | 405.76 | 7     |
| 9  | 1102.51 | 551.76 | 1085.48 | 543.24 | 1084.49 | 542.75 | E   | 715.43  | 358.22 | 698.41  | 349.71 | 697.42  | 349.22 | 6     |
| 10 | 1216.55 | 608.78 | 1199.52 | 600.26 | 1198.54 | 599.77 | N   | 586.39  | 293.7  | 569.37  | 285.19 |         |        | 5     |
| 11 | 1329.63 | 665.32 | 1312.61 | 656.81 | 1311.62 | 656.31 | L   | 472.35  | 236.68 | 455.32  | 228.17 |         |        | 4     |
| 12 | 1428.7  | 714.85 | 1411.67 | 706.34 | 1410.69 | 705.85 | V   | 359.27  | 180.14 | 342.24  | 171.62 |         |        | 3     |
| 13 | 1541.78 | 771.4  | 1524.76 | 762.88 | 1523.77 | 762.39 | L   | 260.2   | 130.6  | 243.17  | 122.09 |         |        | 2     |
| 14 |         |        |         |        |         |        | K   | 147.11  | 74.06  | 130.09  | 65.55  |         |        | 1     |

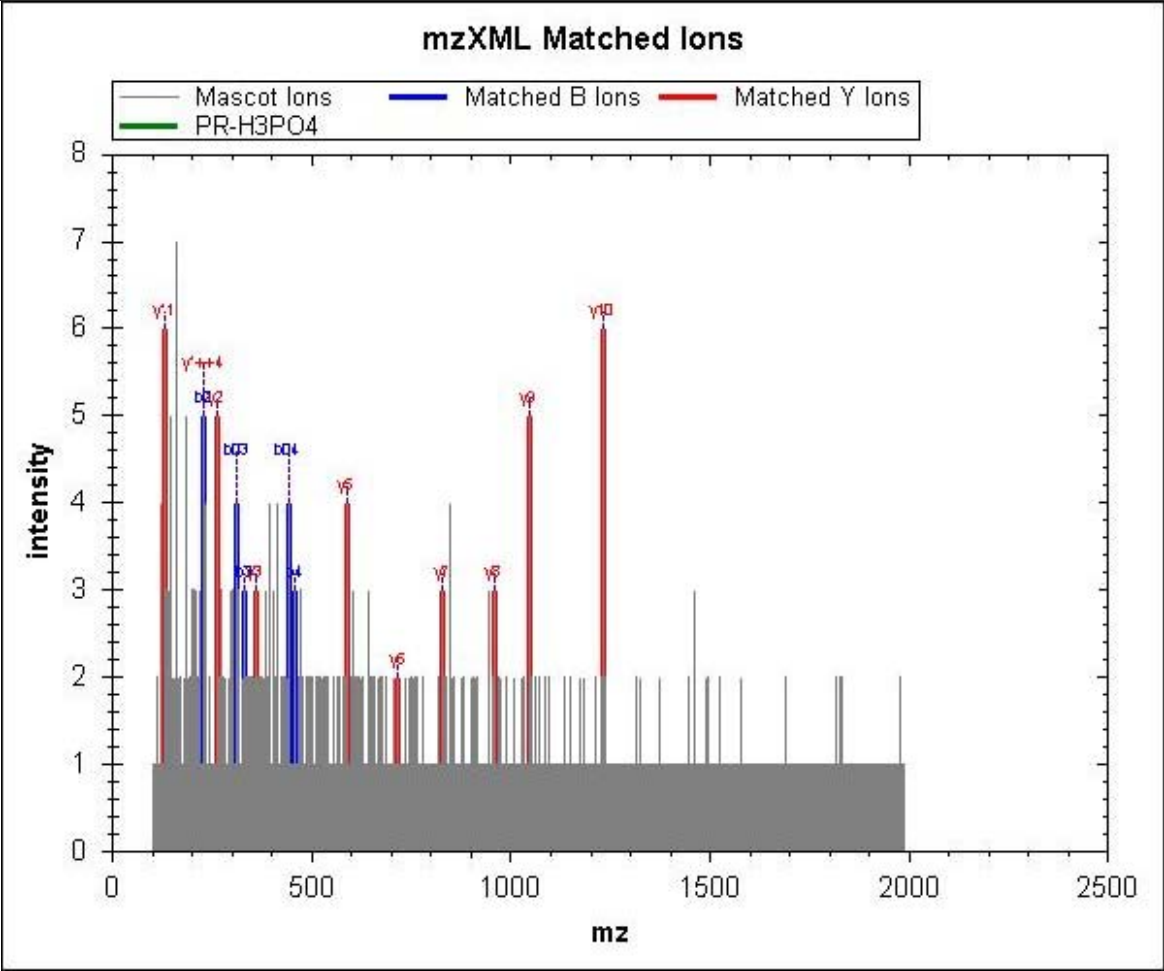

Protein index=680, ACC No:IP100737393

Peptide index=4152 MS/MS spectrum

Sequence: QGKMELLEGLTR, m/z:687.8577, charge:+ 2, Modification: , Mod Position:

Score: 42.89, Raw data:WET\_B3\_090616\_01.mzxml, MS/MS Elution time: 59.65984, Scan number:3231, Mass delta:-0.0315, Rank:1

| No | b       | b++    | b*      | b*++   | b0      | b0++   | Seq | y       | y++    | y*      | y*++   | y0      | y0++   | RevNo |
|----|---------|--------|---------|--------|---------|--------|-----|---------|--------|---------|--------|---------|--------|-------|
| 1  | 129.07  | 65.04  | 112.04  | 56.52  |         |        | Q   |         |        |         |        |         |        | 12    |
| 2  | 186.09  | 93.55  | 169.06  | 85.03  |         |        | G   | 1246.68 | 623.84 | 1229.66 | 615.33 | 1228.67 | 614.84 | 11    |
| 3  | 314.18  | 157.59 | 297.16  | 149.08 |         |        | K   | 1189.66 | 595.33 | 1172.63 | 586.82 | 1171.65 | 586.33 | 10    |
| 4  | 445.22  | 223.11 | 428.2   | 214.6  |         |        | M   | 1061.57 | 531.29 | 1044.54 | 522.77 | 1043.56 | 522.28 | 9     |
| 5  | 574.27  | 287.64 | 557.24  | 279.12 | 556.25  | 278.63 | E   | 930.53  | 465.77 | 913.5   | 457.25 | 912.51  | 456.76 | 8     |
| 6  | 687.35  | 344.18 | 670.32  | 335.67 | 669.34  | 335.17 | L   | 801.48  | 401.25 | 784.46  | 392.73 | 783.47  | 392.24 | 7     |
| 7  | 800.43  | 400.72 | 783.41  | 392.21 | 782.42  | 391.72 | L   | 688.4   | 344.7  | 671.37  | 336.19 | 670.39  | 335.7  | 6     |
| 8  | 929.48  | 465.24 | 912.45  | 456.73 | 911.47  | 456.24 | E   | 575.31  | 288.16 | 558.29  | 279.65 | 557.3   | 279.16 | 5     |
| 9  | 986.5   | 493.75 | 969.47  | 485.24 | 968.49  | 484.75 | G   | 446.27  | 223.64 | 429.25  | 215.13 | 428.26  | 214.63 | 4     |
| 10 | 1099.58 | 550.29 | 1082.56 | 541.78 | 1081.57 | 541.29 | L   | 389.25  | 195.13 | 372.22  | 186.62 | 371.24  | 186.12 | 3     |
| 11 | 1200.63 | 600.82 | 1183.6  | 592.31 | 1182.62 | 591.81 | T   | 276.17  | 138.59 | 259.14  | 130.07 | 258.16  | 129.58 | 2     |
| 12 |         |        |         |        |         |        | R   | 175.12  | 88.06  | 158.09  | 79.55  |         |        | 1     |

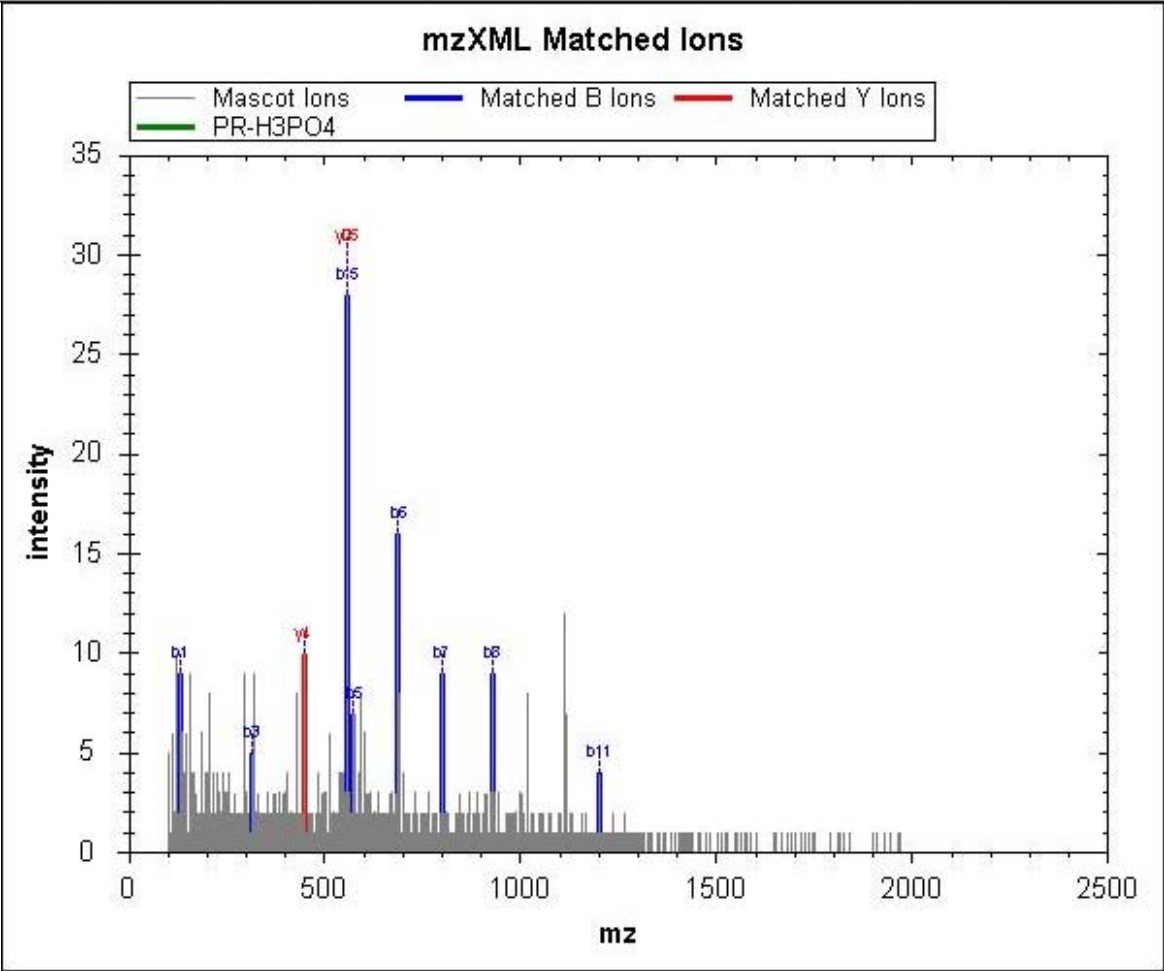

Protein index=682, ACC No:IPI00005792

Peptide index=4363 MS/MS spectrum

Sequence: TSLALDESLFR, m/z:626.3281, charge:+ 2, Modification: , Mod Position:

Score: 96.47, Raw data:WET\_A3\_090615\_02.mzxml, MS/MS Elution time: 61.51067, Scan number:3350, Mass delta:-0.005, Rank:1

| No | b       | b++    | b0      | b0++   | Seq | y       | y++    | y*      | y*++   | y0      | y0++   | RevNo |
|----|---------|--------|---------|--------|-----|---------|--------|---------|--------|---------|--------|-------|
| 1  | 102.05  | 51.53  | 84.04   | 42.53  | T   |         |        |         |        |         |        | 11    |
| 2  | 189.09  | 95.05  | 171.08  | 86.04  | S   | 1150.61 | 575.81 | 1133.58 | 567.3  | 1132.6  | 566.8  | 10    |
| 3  | 302.17  | 151.59 | 284.16  | 142.58 | L   | 1063.58 | 532.29 | 1046.55 | 523.78 | 1045.57 | 523.29 | 9     |
| 4  | 373.21  | 187.11 | 355.2   | 178.1  | A   | 950.49  | 475.75 | 933.47  | 467.24 | 932.48  | 466.75 | 8     |
| 5  | 486.29  | 243.65 | 468.28  | 234.64 | L   | 879.46  | 440.23 | 862.43  | 431.72 | 861.45  | 431.23 | 7     |
| 6  | 601.32  | 301.16 | 583.31  | 292.16 | D   | 766.37  | 383.69 | 749.35  | 375.18 | 748.36  | 374.68 | 6     |
| 7  | 730.36  | 365.68 | 712.35  | 356.68 | E   | 651.35  | 326.18 | 634.32  | 317.66 | 633.34  | 317.17 | 5     |
| 8  | 817.39  | 409.2  | 799.38  | 400.2  | S   | 522.3   | 261.66 | 505.28  | 253.14 | 504.29  | 252.65 | 4     |
| 9  | 930.48  | 465.74 | 912.47  | 456.74 | L   | 435.27  | 218.14 | 418.24  | 209.63 |         |        | 3     |
| 10 | 1077.55 | 539.28 | 1059.54 | 530.27 | F   | 322.19  | 161.6  | 305.16  | 153.08 |         |        | 2     |
| 11 |         |        |         |        | R   | 175.12  | 88.06  | 158.09  | 79.55  |         |        | 1     |

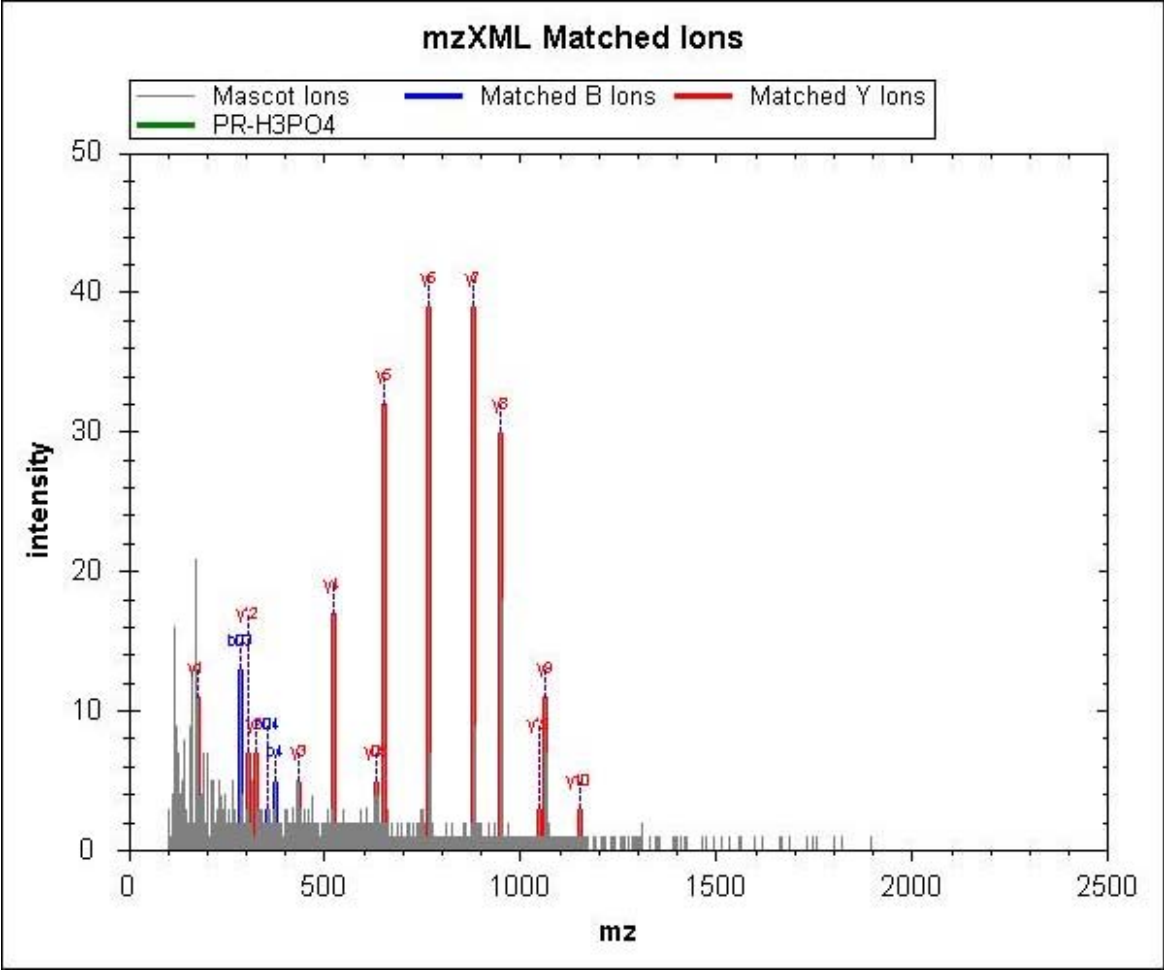

Protein index=683, ACC No:IP100377261

Peptide index=469 MS/MS spectrum

Sequence: SINQQSGAHVELQR, m/z:522.933, charge:+ 3, Modification: , Mod Position:

Score: 47.27, Raw data:WET\_A3\_090615\_01.mzxml, MS/MS Elution time: 19.95467, Scan number:928, Mass delta:-0.0139, Rank:1

| No | b       | b++    | b*      | b*++   | b0      | b0++   | Seq | y       | y++    | y*      | y*++   | y0      | y0++   | RevNo |
|----|---------|--------|---------|--------|---------|--------|-----|---------|--------|---------|--------|---------|--------|-------|
| 1  | 88.04   | 44.52  |         |        | 70.03   | 35.52  | S   |         |        |         |        |         |        | 14    |
| 2  | 201.12  | 101.07 |         |        | 183.11  | 92.06  | I   | 1479.77 | 740.39 | 1462.74 | 731.87 | 1461.76 | 731.38 | 13    |
| 3  | 315.17  | 158.09 | 298.14  | 149.57 | 297.16  | 149.08 | N   | 1366.68 | 683.84 | 1349.66 | 675.33 | 1348.67 | 674.84 | 12    |
| 4  | 443.22  | 222.12 | 426.2   | 213.6  | 425.21  | 213.11 | Q   | 1252.64 | 626.82 | 1235.61 | 618.31 | 1234.63 | 617.82 | 11    |
| 5  | 571.28  | 286.15 | 554.26  | 277.63 | 553.27  | 277.14 | Q   | 1124.58 | 562.79 | 1107.55 | 554.28 | 1106.57 | 553.79 | 10    |
| 6  | 658.32  | 329.66 | 641.29  | 321.15 | 640.3   | 320.66 | S   | 996.52  | 498.76 | 979.5   | 490.25 | 978.51  | 489.76 | 9     |
| 7  | 715.34  | 358.17 | 698.31  | 349.66 | 697.33  | 349.17 | G   | 909.49  | 455.25 | 892.46  | 446.74 | 891.48  | 446.24 | 8     |
| 8  | 786.37  | 393.69 | 769.35  | 385.18 | 768.36  | 384.69 | A   | 852.47  | 426.74 | 835.44  | 418.22 | 834.46  | 417.73 | 7     |
| 9  | 923.43  | 462.22 | 906.41  | 453.71 | 905.42  | 453.21 | H   | 781.43  | 391.22 | 764.4   | 382.71 | 763.42  | 382.21 | 6     |
| 10 | 1022.5  | 511.75 | 1005.47 | 503.24 | 1004.49 | 502.75 | V   | 644.37  | 322.69 | 627.35  | 314.18 | 626.36  | 313.68 | 5     |
| 11 | 1151.54 | 576.28 | 1134.52 | 567.76 | 1133.53 | 567.27 | E   | 545.3   | 273.16 | 528.28  | 264.64 | 527.29  | 264.15 | 4     |
| 12 | 1264.63 | 632.82 | 1247.6  | 624.3  | 1246.62 | 623.81 | L   | 416.26  | 208.63 | 399.24  | 200.12 |         |        | 3     |
| 13 | 1392.69 | 696.85 | 1375.66 | 688.33 | 1374.68 | 687.84 | Q   | 303.18  | 152.09 | 286.15  | 143.58 |         |        | 2     |
| 14 |         |        |         |        |         |        | R   | 175.12  | 88.06  | 158.09  | 79.55  |         |        | 1     |

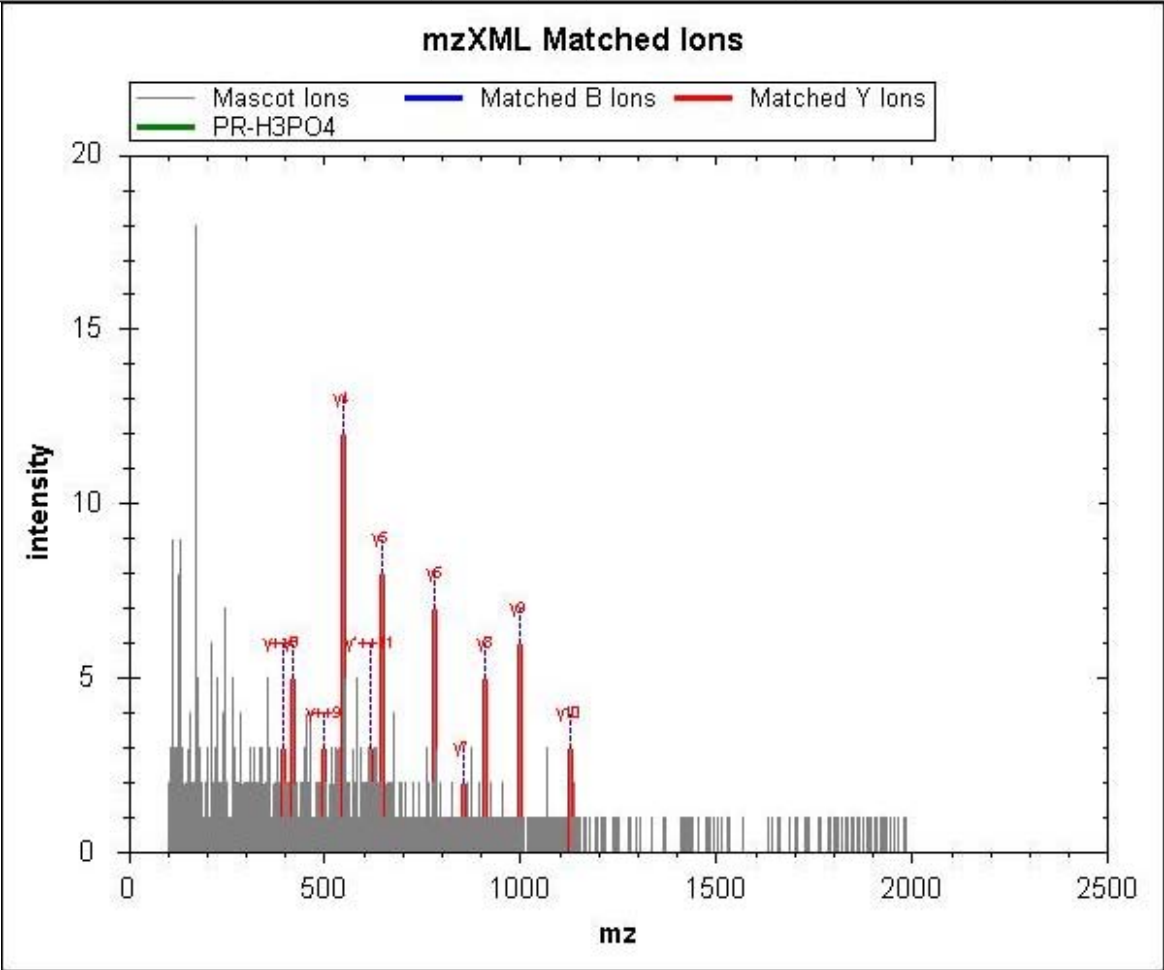

Protein index=686, ACC No:IPI00185374

Peptide index=6200 MS/MS spectrum

Sequence: LQEVITLLSLEK, m/z:757.9367, charge:+ 2, Modification: , Mod Position:

Score: 51.9, Raw data:WET\_A3\_090615\_03.mzxml, MS/MS Elution time: 83.89333, Scan number:4670, Mass delta:0.0046, Rank:1

| No | b       | b++    | b*      | b*++   | b0      | b0++   | Seq | y       | y++    | y*      | y*++   | y0      | y0++   | RevNo |
|----|---------|--------|---------|--------|---------|--------|-----|---------|--------|---------|--------|---------|--------|-------|
| 1  | 114.09  | 57.55  |         |        |         |        | L   |         |        |         |        |         |        | 13    |
| 2  | 242.15  | 121.58 | 225.12  | 113.07 |         |        | Q   | 1401.78 | 701.4  | 1384.76 | 692.88 | 1383.77 | 692.39 | 12    |
| 3  | 371.19  | 186.1  | 354.17  | 177.59 | 353.18  | 177.09 | E   | 1273.72 | 637.37 | 1256.7  | 628.85 | 1255.71 | 628.36 | 11    |
| 4  | 470.26  | 235.63 | 453.23  | 227.12 | 452.25  | 226.63 | V   | 1144.68 | 572.84 | 1127.66 | 564.33 | 1126.67 | 563.84 | 10    |
| 5  | 583.34  | 292.18 | 566.32  | 283.66 | 565.33  | 283.17 | I   | 1045.61 | 523.31 | 1028.59 | 514.8  | 1027.6  | 514.31 | 9     |
| 6  | 712.39  | 356.7  | 695.36  | 348.18 | 694.38  | 347.69 | E   | 932.53  | 466.77 | 915.5   | 458.26 | 914.52  | 457.76 | 8     |
| 7  | 813.44  | 407.22 | 796.41  | 398.71 | 795.42  | 398.22 | T   | 803.49  | 402.25 | 786.46  | 393.73 | 785.48  | 393.24 | 7     |
| 8  | 926.52  | 463.76 | 909.49  | 455.25 | 908.51  | 454.76 | L   | 702.44  | 351.72 | 685.41  | 343.21 | 684.43  | 342.72 | 6     |
| 9  | 1039.6  | 520.31 | 1022.58 | 511.79 | 1021.59 | 511.3  | L   | 589.36  | 295.18 | 572.33  | 286.67 | 571.34  | 286.18 | 5     |
| 10 | 1126.64 | 563.82 | 1109.61 | 555.31 | 1108.62 | 554.82 | S   | 476.27  | 238.64 | 459.24  | 230.13 | 458.26  | 229.63 | 4     |
| 11 | 1239.72 | 620.36 | 1222.69 | 611.85 | 1221.71 | 611.36 | L   | 389.24  | 195.12 | 372.21  | 186.61 | 371.23  | 186.12 | 3     |
| 12 | 1368.76 | 684.88 | 1351.74 | 676.37 | 1350.75 | 675.88 | E   | 276.16  | 138.58 | 259.13  | 130.07 | 258.14  | 129.58 | 2     |
| 13 |         |        |         |        |         |        | K   | 147.11  | 74.06  | 130.09  | 65.55  |         |        | 1     |

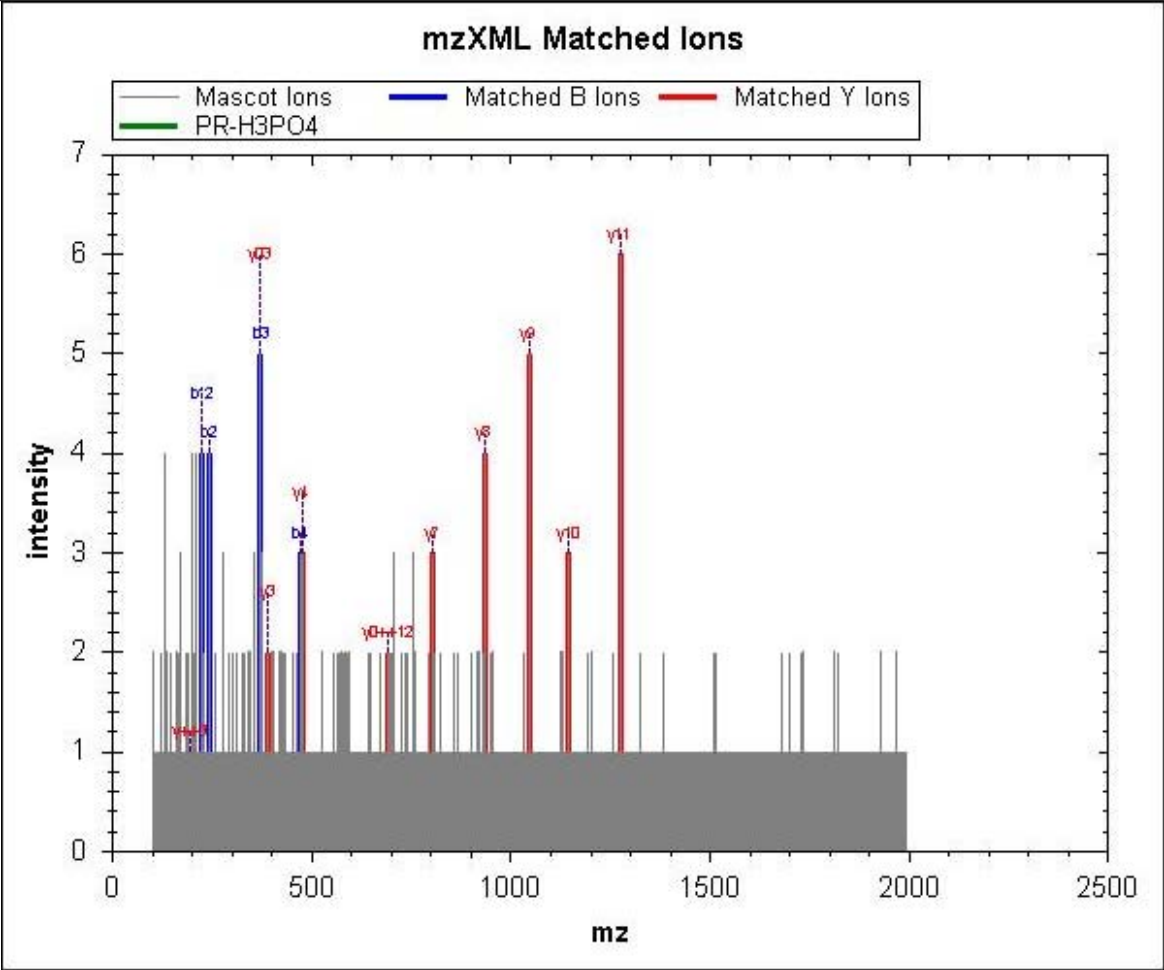

Protein index=687, ACC No:IPI00010278

Peptide index=7106 MS/MS spectrum

Sequence: GFNDDVLLQIVHFLLNRPK, m/z:746.7501, charge:+ 3, Modification: , Mod Position:

Score: 40.22, Raw data:WET\_A3\_090615\_02.mzxml, MS/MS Elution time: 107.3058, Scan number:6032, Mass delta:-0.0035, Rank:1

| No | b       | b++     | b*      | b*++    | b0      | b0++    | Seq | y       | y++     | y*      | y*++    | y0      | y0++    | RevNo |
|----|---------|---------|---------|---------|---------|---------|-----|---------|---------|---------|---------|---------|---------|-------|
| 1  | 58.03   | 29.52   |         |         |         |         | G   |         |         |         |         |         |         | 19    |
| 2  | 205.1   | 103.05  |         |         |         |         | F   | 2181.22 | 1091.11 | 2164.19 | 1082.6  | 2163.21 | 1082.11 | 18    |
| 3  | 319.14  | 160.07  | 302.11  | 151.56  |         |         | N   | 2034.15 | 1017.58 | 2017.12 | 1009.07 | 2016.14 | 1008.57 | 17    |
| 4  | 434.17  | 217.59  | 417.14  | 209.07  | 416.16  | 208.58  | D   | 1920.11 | 960.56  | 1903.08 | 952.04  | 1902.1  | 951.55  | 16    |
| 5  | 549.19  | 275.1   | 532.17  | 266.59  | 531.18  | 266.1   | D   | 1805.08 | 903.04  | 1788.05 | 894.53  | 1787.07 | 894.04  | 15    |
| 6  | 648.26  | 324.63  | 631.24  | 316.12  | 630.25  | 315.63  | V   | 1690.05 | 845.53  | 1673.03 | 837.02  |         |         | 14    |
| 7  | 761.35  | 381.18  | 744.32  | 372.66  | 743.34  | 372.17  | L   | 1590.98 | 796     | 1573.96 | 787.48  |         |         | 13    |
| 8  | 874.43  | 437.72  | 857.4   | 429.21  | 856.42  | 428.71  | L   | 1477.9  | 739.45  | 1460.87 | 730.94  |         |         | 12    |
| 9  | 1002.49 | 501.75  | 985.46  | 493.23  | 984.48  | 492.74  | Q   | 1364.82 | 682.91  | 1347.79 | 674.4   |         |         | 11    |
| 10 | 1115.57 | 558.29  | 1098.55 | 549.78  | 1097.56 | 549.28  | I   | 1236.76 | 618.88  | 1219.73 | 610.37  |         |         | 10    |
| 11 | 1214.64 | 607.82  | 1197.62 | 599.31  | 1196.63 | 598.82  | V   | 1123.67 | 562.34  | 1106.65 | 553.83  |         |         | 9     |
| 12 | 1351.7  | 676.35  | 1334.67 | 667.84  | 1333.69 | 667.35  | H   | 1024.61 | 512.81  | 1007.58 | 504.29  |         |         | 8     |
| 13 | 1498.77 | 749.89  | 1481.74 | 741.37  | 1480.76 | 740.88  | F   | 887.55  | 444.28  | 870.52  | 435.76  |         |         | 7     |
| 14 | 1611.85 | 806.43  | 1594.83 | 797.92  | 1593.84 | 797.42  | L   | 740.48  | 370.74  | 723.45  | 362.23  |         |         | 6     |
| 15 | 1724.94 | 862.97  | 1707.91 | 854.46  | 1706.93 | 853.97  | L   | 627.39  | 314.2   | 610.37  | 305.69  |         |         | 5     |
| 16 | 1838.98 | 919.99  | 1821.95 | 911.48  | 1820.97 | 910.99  | N   | 514.31  | 257.66  | 497.28  | 249.15  |         |         | 4     |
| 17 | 1995.08 | 998.04  | 1978.05 | 989.53  | 1977.07 | 989.04  | R   | 400.27  | 200.64  | 383.24  | 192.12  |         |         | 3     |
| 18 | 2092.13 | 1046.57 | 2075.11 | 1038.06 | 2074.12 | 1037.57 | P   | 244.17  | 122.59  | 227.14  | 114.07  |         |         | 2     |
| 19 |         |         |         |         |         |         | K   | 147.11  | 74.06   | 130.09  | 65.55   |         |         | 1     |

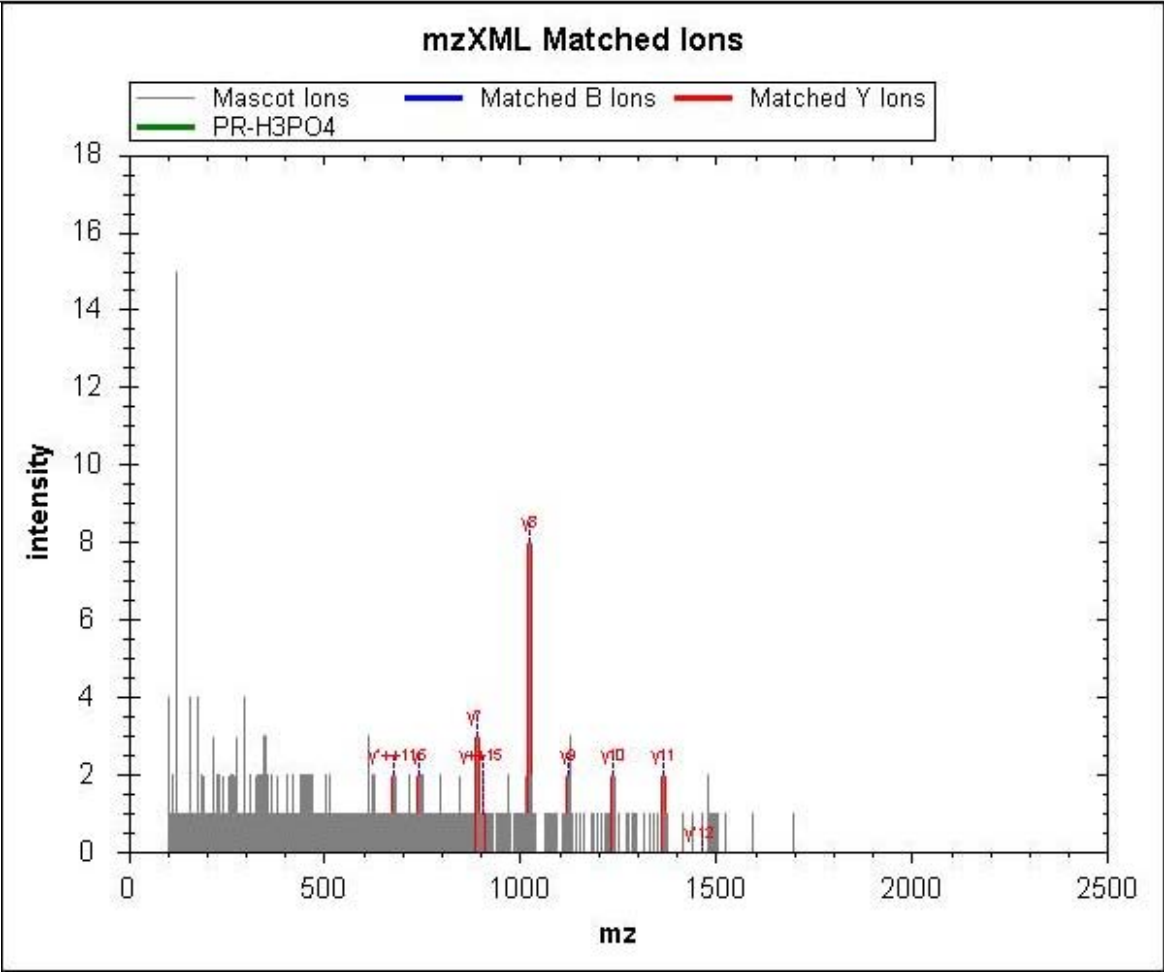

Protein index=688, ACC No:IPI00302927

Peptide index=5994 MS/MS spectrum

Sequence: DALSDLALHFLNK, m/z:728.8945, charge:+ 2, Modification: , Mod Position:

Score: 75.23, Raw data:WET\_A3\_090615\_03.mzxml, MS/MS Elution time: 80.6895, Scan number:4482, Mass delta:0.0012, Rank:1

| No | b       | b++    | b*      | b*++   | b0      | b0++   | Seq | y       | y++    | y*      | y*++   | y0      | y0++   | RevNo |
|----|---------|--------|---------|--------|---------|--------|-----|---------|--------|---------|--------|---------|--------|-------|
| 1  | 116.03  | 58.52  |         |        | 98.02   | 49.52  | D   |         |        |         |        |         |        | 13    |
| 2  | 187.07  | 94.04  |         |        | 169.06  | 85.03  | A   | 1341.75 | 671.38 | 1324.73 | 662.87 | 1323.74 | 662.37 | 12    |
| 3  | 300.16  | 150.58 |         |        | 282.14  | 141.58 | L   | 1270.72 | 635.86 | 1253.69 | 627.35 | 1252.7  | 626.86 | 11    |
| 4  | 387.19  | 194.1  |         |        | 369.18  | 185.09 | S   | 1157.63 | 579.32 | 1140.6  | 570.81 | 1139.62 | 570.31 | 10    |
| 5  | 502.21  | 251.61 |         |        | 484.2   | 242.61 | D   | 1070.6  | 535.8  | 1053.57 | 527.29 | 1052.59 | 526.8  | 9     |
| 6  | 615.3   | 308.15 |         |        | 597.29  | 299.15 | L   | 955.57  | 478.29 | 938.55  | 469.78 |         |        | 8     |
| 7  | 686.34  | 343.67 |         |        | 668.33  | 334.67 | A   | 842.49  | 421.75 | 825.46  | 413.23 |         |        | 7     |
| 8  | 799.42  | 400.21 |         |        | 781.41  | 391.21 | L   | 771.45  | 386.23 | 754.42  | 377.72 |         |        | 6     |
| 9  | 936.48  | 468.74 |         |        | 918.47  | 459.74 | H   | 658.37  | 329.69 | 641.34  | 321.17 |         |        | 5     |
| 10 | 1083.55 | 542.28 |         |        | 1065.54 | 533.27 | F   | 521.31  | 261.16 | 504.28  | 252.64 |         |        | 4     |
| 11 | 1196.63 | 598.82 |         |        | 1178.62 | 589.81 | L   | 374.24  | 187.62 | 357.21  | 179.11 |         |        | 3     |
| 12 | 1310.67 | 655.84 | 1293.65 | 647.33 | 1292.66 | 646.84 | N   | 261.16  | 131.08 | 244.13  | 122.57 |         |        | 2     |

|    |  |  |  |  |   |        |       |        |       |  |  |   |
|----|--|--|--|--|---|--------|-------|--------|-------|--|--|---|
| 13 |  |  |  |  | K | 147.11 | 74.06 | 130.09 | 65.55 |  |  | 1 |
|----|--|--|--|--|---|--------|-------|--------|-------|--|--|---|

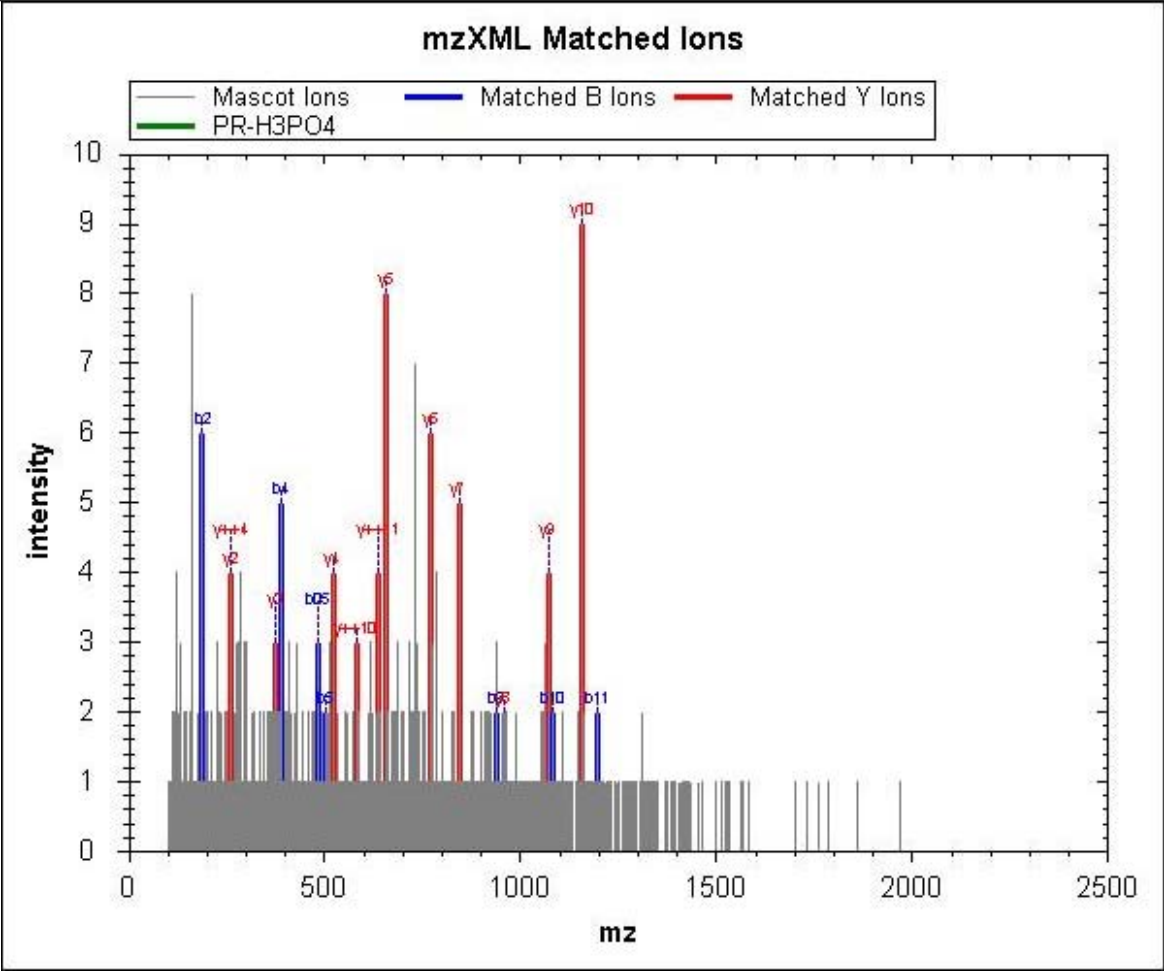

Protein index=689, ACC No: IPI00031801

Peptide index=1452 MS/MS spectrum

Sequence: GAEAANVTGPDGVPVEGSR, m/z:891.9378, charge:+ 2, Modification: , Mod Position:  
Score: 79.58, Raw data:WET\_A3\_090615\_02.mzxml, MS/MS Elution time: 33.4145, Scan number:1718, Mass delta:0.0067, Rank:1

| No | b      | b++    | b*     | b*++   | b0     | b0++   | Seq | y       | y++    | y*      | y*++   | y0      | y0++   | RevNo |
|----|--------|--------|--------|--------|--------|--------|-----|---------|--------|---------|--------|---------|--------|-------|
| 1  | 58.03  | 29.52  |        |        |        |        | G   |         |        |         |        |         |        | 19    |
| 2  | 129.07 | 65.04  |        |        |        |        | A   | 1725.84 | 863.42 | 1708.81 | 854.91 | 1707.83 | 854.42 | 18    |
| 3  | 258.11 | 129.56 |        |        | 240.1  | 120.55 | E   | 1654.8  | 827.91 | 1637.78 | 819.39 | 1636.79 | 818.9  | 17    |
| 4  | 329.15 | 165.08 |        |        | 311.13 | 156.07 | A   | 1525.76 | 763.38 | 1508.73 | 754.87 | 1507.75 | 754.38 | 16    |
| 5  | 400.18 | 200.59 |        |        | 382.17 | 191.59 | A   | 1454.72 | 727.87 | 1437.7  | 719.35 | 1436.71 | 718.86 | 15    |
| 6  | 514.23 | 257.62 | 497.2  | 249.1  | 496.22 | 248.61 | N   | 1383.69 | 692.35 | 1366.66 | 683.83 | 1365.68 | 683.34 | 14    |
| 7  | 613.29 | 307.15 | 596.27 | 298.64 | 595.28 | 298.15 | V   | 1269.64 | 635.33 | 1252.62 | 626.81 | 1251.63 | 626.32 | 13    |
| 8  | 714.34 | 357.67 | 697.32 | 349.16 | 696.33 | 348.67 | T   | 1170.57 | 585.79 | 1153.55 | 577.28 | 1152.56 | 576.79 | 12    |
| 9  | 771.36 | 386.19 | 754.34 | 377.67 | 753.35 | 377.18 | G   | 1069.53 | 535.27 | 1052.5  | 526.75 | 1051.52 | 526.26 | 11    |
| 10 | 868.42 | 434.71 | 851.39 | 426.2  | 850.41 | 425.71 | P   | 1012.51 | 506.76 | 995.48  | 498.24 | 994.5   | 497.75 | 10    |
| 11 | 983.44 | 492.23 | 966.42 | 483.71 | 965.43 | 483.22 | D   | 915.45  | 458.23 | 898.43  | 449.72 | 897.44  | 449.22 | 9     |

|    |         |        |         |        |         |        |   |        |        |        |        |        |        |   |
|----|---------|--------|---------|--------|---------|--------|---|--------|--------|--------|--------|--------|--------|---|
| 12 | 1040.46 | 520.74 | 1023.44 | 512.22 | 1022.45 | 511.73 | G | 800.43 | 400.72 | 783.4  | 392.2  | 782.42 | 391.71 | 8 |
| 13 | 1139.53 | 570.27 | 1122.51 | 561.76 | 1121.52 | 561.26 | V | 743.4  | 372.21 | 726.38 | 363.69 | 725.39 | 363.2  | 7 |
| 14 | 1236.59 | 618.8  | 1219.56 | 610.28 | 1218.57 | 609.79 | P | 644.34 | 322.67 | 627.31 | 314.16 | 626.33 | 313.67 | 6 |
| 15 | 1335.65 | 668.33 | 1318.63 | 659.82 | 1317.64 | 659.33 | V | 547.28 | 274.15 | 530.26 | 265.63 | 529.27 | 265.14 | 5 |
| 16 | 1464.7  | 732.85 | 1447.67 | 724.34 | 1446.69 | 723.85 | E | 448.22 | 224.61 | 431.19 | 216.1  | 430.2  | 215.61 | 4 |
| 17 | 1521.72 | 761.36 | 1504.69 | 752.85 | 1503.71 | 752.36 | G | 319.17 | 160.09 | 302.15 | 151.58 | 301.16 | 151.08 | 3 |
| 18 | 1608.75 | 804.88 | 1591.72 | 796.37 | 1590.74 | 795.87 | S | 262.15 | 131.58 | 245.12 | 123.07 | 244.14 | 122.57 | 2 |
| 19 |         |        |         |        |         |        | R | 175.12 | 88.06  | 158.09 | 79.55  |        |        | 1 |

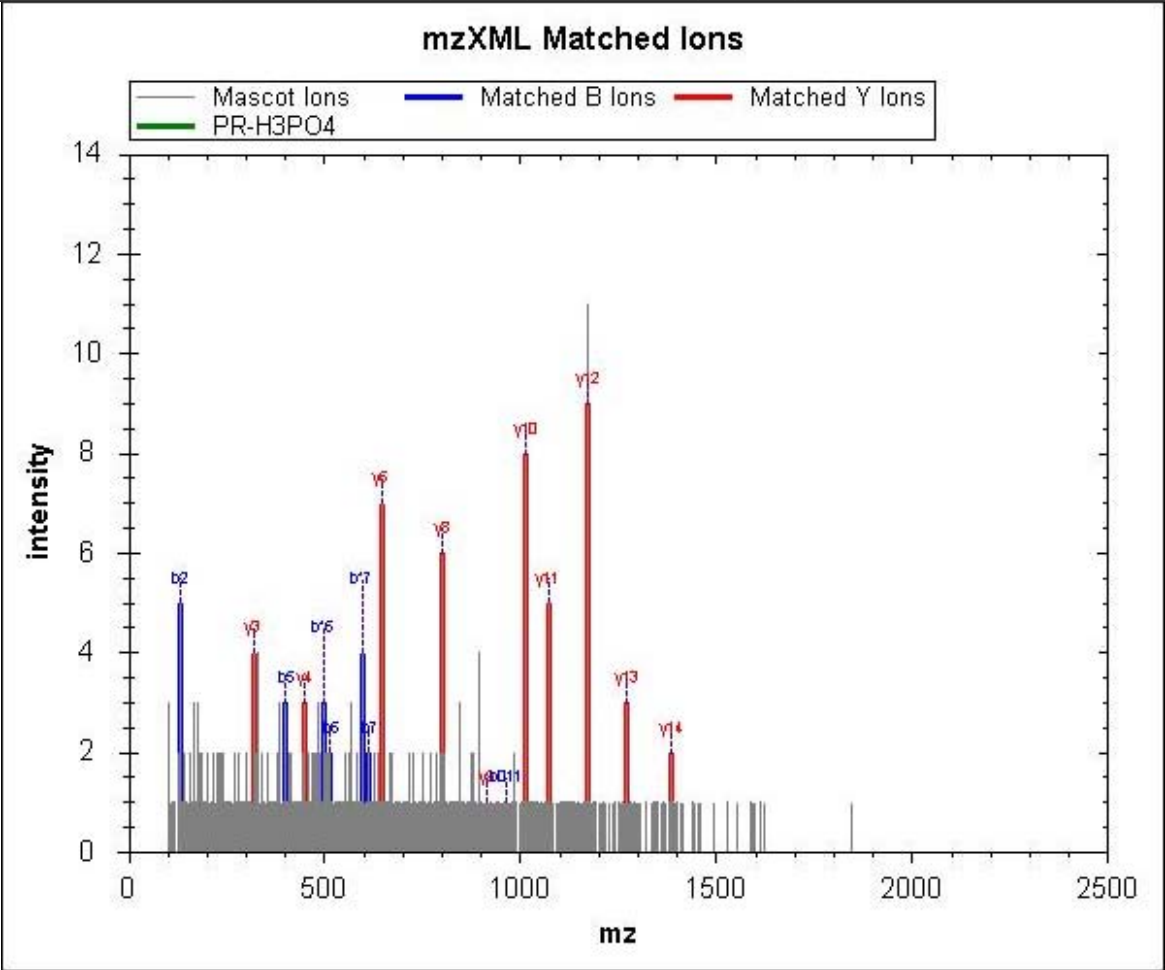

Protein index=690, ACC No:IPI00440688

Peptide index=1704 MS/MS spectrum

Sequence: FAASGGFLHHMAGLSSSK, m/z:607.6282, charge:+ 3, Modification: Oxidation (M), Mod Position: 0.000000000010000000.0

Score: 37.2, Raw data:WET\_A3\_090615\_02.mzxml, MS/MS Elution time: 36.6385, Scan number:1905, Mass delta:-0.0049, Rank:1

| No | b      | b++    | b0 | b0++ | Seq | y       | y++    | y*      | y*++   | y0      | y0++   | RevNo |
|----|--------|--------|----|------|-----|---------|--------|---------|--------|---------|--------|-------|
| 1  | 148.08 | 74.54  |    |      | F   |         |        |         |        |         |        | 18    |
| 2  | 219.11 | 110.06 |    |      | A   | 1609.81 | 805.41 | 1592.78 | 796.89 | 1591.8  | 796.4  | 17    |
| 3  | 290.15 | 145.58 |    |      | A   | 1538.77 | 769.89 | 1521.74 | 761.38 | 1520.76 | 760.88 | 16    |

|    |         |        |         |        |   |         |        |         |        |         |        |    |
|----|---------|--------|---------|--------|---|---------|--------|---------|--------|---------|--------|----|
| 4  | 377.18  | 189.09 | 359.17  | 180.09 | S | 1467.73 | 734.37 | 1450.71 | 725.86 | 1449.72 | 725.37 | 15 |
| 5  | 434.2   | 217.61 | 416.19  | 208.6  | G | 1380.7  | 690.85 | 1363.68 | 682.34 | 1362.69 | 681.85 | 14 |
| 6  | 491.22  | 246.12 | 473.21  | 237.11 | G | 1323.68 | 662.34 | 1306.65 | 653.83 | 1305.67 | 653.34 | 13 |
| 7  | 638.29  | 319.65 | 620.28  | 310.64 | F | 1266.66 | 633.83 | 1249.63 | 625.32 | 1248.65 | 624.83 | 12 |
| 8  | 751.38  | 376.19 | 733.37  | 367.19 | L | 1119.59 | 560.3  | 1102.56 | 551.79 | 1101.58 | 551.29 | 11 |
| 9  | 888.44  | 444.72 | 870.43  | 435.72 | H | 1006.51 | 503.76 | 989.48  | 495.24 | 988.5   | 494.75 | 10 |
| 10 | 1025.5  | 513.25 | 1007.48 | 504.25 | H | 869.45  | 435.23 | 852.42  | 426.71 | 851.44  | 426.22 | 9  |
| 11 | 1108.53 | 554.77 | 1090.52 | 545.76 | M | 732.39  | 366.7  | 715.36  | 358.18 | 714.38  | 357.69 | 8  |
| 12 | 1179.57 | 590.29 | 1161.56 | 581.28 | A | 649.35  | 325.18 | 632.32  | 316.67 | 631.34  | 316.17 | 7  |
| 13 | 1236.59 | 618.8  | 1218.58 | 609.79 | G | 578.31  | 289.66 | 561.29  | 281.15 | 560.3   | 280.66 | 6  |
| 14 | 1349.68 | 675.34 | 1331.66 | 666.34 | L | 521.29  | 261.15 | 504.27  | 252.64 | 503.28  | 252.14 | 5  |
| 15 | 1436.71 | 718.86 | 1418.7  | 709.85 | S | 408.21  | 204.61 | 391.18  | 196.09 | 390.2   | 195.6  | 4  |
| 16 | 1523.74 | 762.37 | 1505.73 | 753.37 | S | 321.18  | 161.09 | 304.15  | 152.58 | 303.17  | 152.09 | 3  |
| 17 | 1610.77 | 805.89 | 1592.76 | 796.88 | S | 234.14  | 117.58 | 217.12  | 109.06 | 216.13  | 108.57 | 2  |
| 18 |         |        |         |        | K | 147.11  | 74.06  | 130.09  | 65.55  |         |        | 1  |

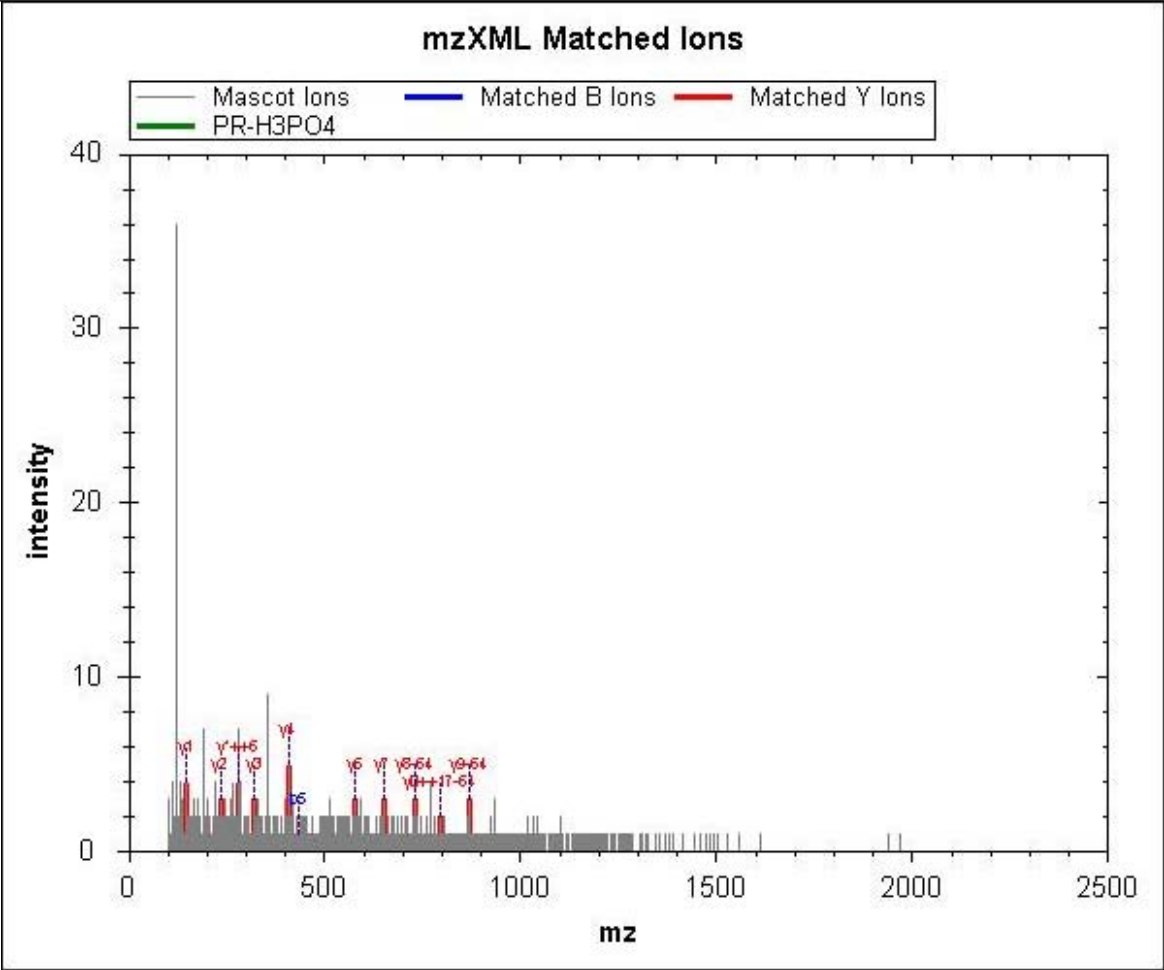

Protein index=692, ACC No:IPI00007074

Peptide index=5346 MS/MS spectrum

Sequence: APWELLELR, m/z:563.8183, charge:+ 2, Modification: , Mod Position:

Score: 47.81, Raw data:WET\_A3\_090615\_02.mzxml, MS/MS Elution time: 72.17184, Scan number:3969,



|    |         |        |         |        |         |        |   |         |        |         |        |         |        |    |
|----|---------|--------|---------|--------|---------|--------|---|---------|--------|---------|--------|---------|--------|----|
| 1  | 100.08  | 50.54  |         |        |         |        | V |         |        |         |        |         |        | 17 |
| 2  | 231.12  | 116.06 |         |        |         |        | M | 1810.02 | 905.51 | 1792.99 | 897    | 1792.01 | 896.51 | 16 |
| 3  | 359.17  | 180.09 | 342.15  | 171.58 |         |        | Q | 1678.98 | 839.99 | 1661.95 | 831.48 | 1660.97 | 830.99 | 15 |
| 4  | 488.22  | 244.61 | 471.19  | 236.1  | 470.21  | 235.61 | E | 1550.92 | 775.96 | 1533.89 | 767.45 | 1532.91 | 766.96 | 14 |
| 5  | 617.26  | 309.13 | 600.23  | 300.62 | 599.25  | 300.13 | E | 1421.88 | 711.44 | 1404.85 | 702.93 | 1403.87 | 702.44 | 13 |
| 6  | 730.34  | 365.68 | 713.32  | 357.16 | 712.33  | 356.67 | I | 1292.83 | 646.92 | 1275.81 | 638.41 |         |        | 12 |
| 7  | 877.41  | 439.21 | 860.39  | 430.7  | 859.4   | 430.2  | F | 1179.75 | 590.38 | 1162.72 | 581.87 |         |        | 11 |
| 8  | 934.43  | 467.72 | 917.41  | 459.21 | 916.42  | 458.72 | G | 1032.68 | 516.84 | 1015.65 | 508.33 |         |        | 10 |
| 9  | 1031.49 | 516.25 | 1014.46 | 507.73 | 1013.48 | 507.24 | P | 975.66  | 488.33 | 958.63  | 479.82 |         |        | 9  |
| 10 | 1144.57 | 572.79 | 1127.54 | 564.28 | 1126.56 | 563.78 | I | 878.61  | 439.81 | 861.58  | 431.29 |         |        | 8  |
| 11 | 1257.65 | 629.33 | 1240.63 | 620.82 | 1239.64 | 620.33 | L | 765.52  | 383.27 | 748.5   | 374.75 |         |        | 7  |
| 12 | 1354.71 | 677.86 | 1337.68 | 669.34 | 1336.7  | 668.85 | P | 652.44  | 326.72 | 635.41  | 318.21 |         |        | 6  |
| 13 | 1467.79 | 734.4  | 1450.77 | 725.89 | 1449.78 | 725.39 | I | 555.39  | 278.2  | 538.36  | 269.68 |         |        | 5  |
| 14 | 1566.86 | 783.93 | 1549.83 | 775.42 | 1548.85 | 774.93 | V | 442.3   | 221.65 | 425.28  | 213.14 |         |        | 4  |
| 15 | 1663.91 | 832.46 | 1646.89 | 823.95 | 1645.9  | 823.45 | P | 343.23  | 172.12 | 326.21  | 163.61 |         |        | 3  |
| 16 | 1762.98 | 881.99 | 1745.95 | 873.48 | 1744.97 | 872.99 | V | 246.18  | 123.59 | 229.15  | 115.08 |         |        | 2  |
| 17 |         |        |         |        |         |        | K | 147.11  | 74.06  | 130.09  | 65.55  |         |        | 1  |

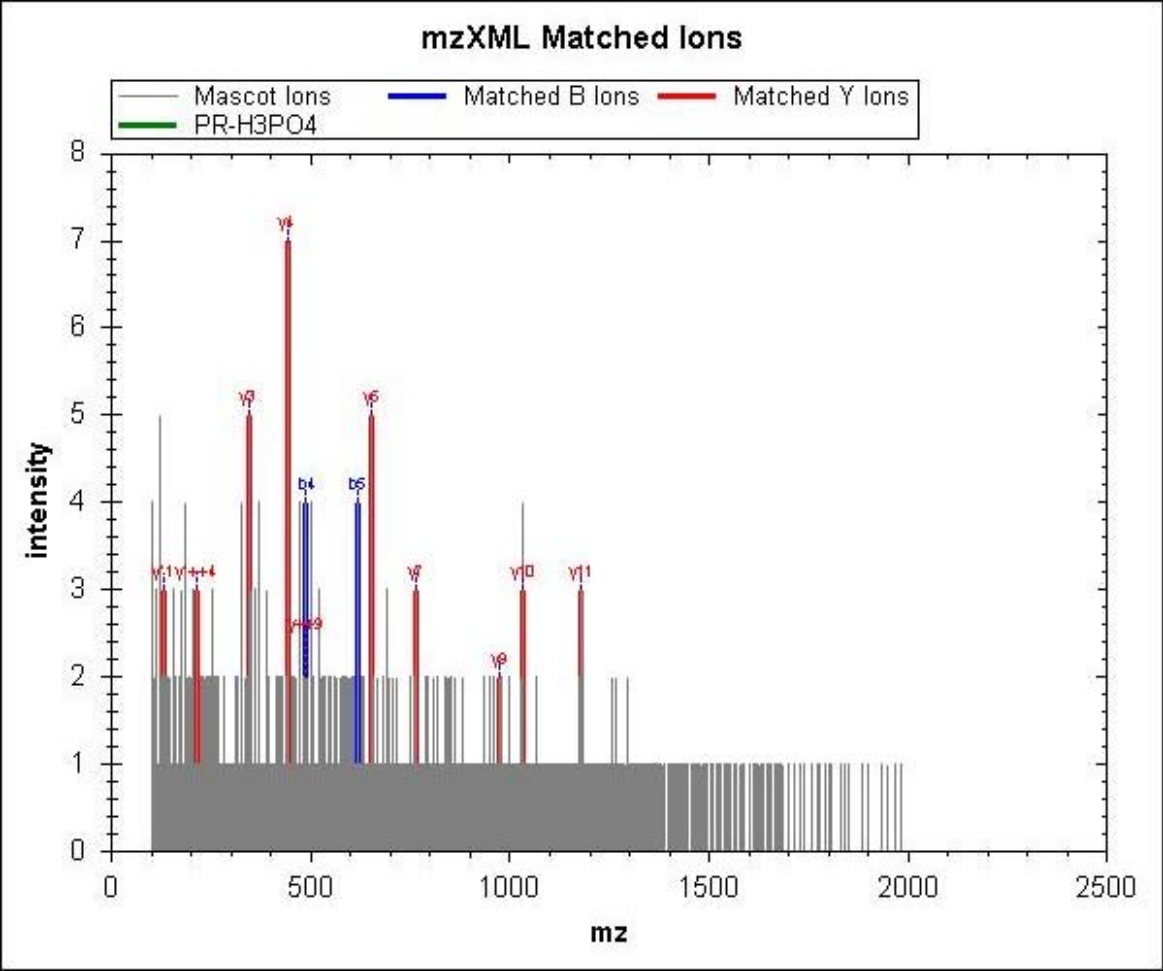

Protein index=698, ACC No:IPI00028006

Peptide index=2171 MS/MS spectrum

Sequence: AVELLRK, m/z:414.7637, charge:+ 2, Modification: , Mod Position:

Score: 32.37, Raw data:WET\_A3\_090615\_02.mzxml, MS/MS Elution time: 41.67883, Scan number:2198, Mass delta:-0.01, Rank:1

| No | b      | b++    | b*    | b*++  | b0     | b0++   | Seq | y      | y++    | y*     | y*++   | y0     | y0++   | RevNo |
|----|--------|--------|-------|-------|--------|--------|-----|--------|--------|--------|--------|--------|--------|-------|
| 1  | 72.04  | 36.53  |       |       |        |        | A   |        |        |        |        |        |        | 7     |
| 2  | 171.11 | 86.06  |       |       |        |        | V   | 757.49 | 379.25 | 740.47 | 370.74 | 739.48 | 370.24 | 6     |
| 3  | 300.16 | 150.58 |       |       | 282.14 | 141.58 | E   | 658.42 | 329.72 | 641.4  | 321.2  | 640.41 | 320.71 | 5     |
| 4  | 413.24 | 207.12 |       |       | 395.23 | 198.12 | L   | 529.38 | 265.19 | 512.36 | 256.68 |        |        | 4     |
| 5  | 526.32 | 263.67 |       |       | 508.31 | 254.66 | L   | 416.3  | 208.65 | 399.27 | 200.14 |        |        | 3     |
| 6  | 682.42 | 341.72 | 665.4 | 333.2 | 664.41 | 332.71 | R   | 303.21 | 152.11 | 286.19 | 143.6  |        |        | 2     |
| 7  |        |        |       |       |        |        | K   | 147.11 | 74.06  | 130.09 | 65.55  |        |        | 1     |

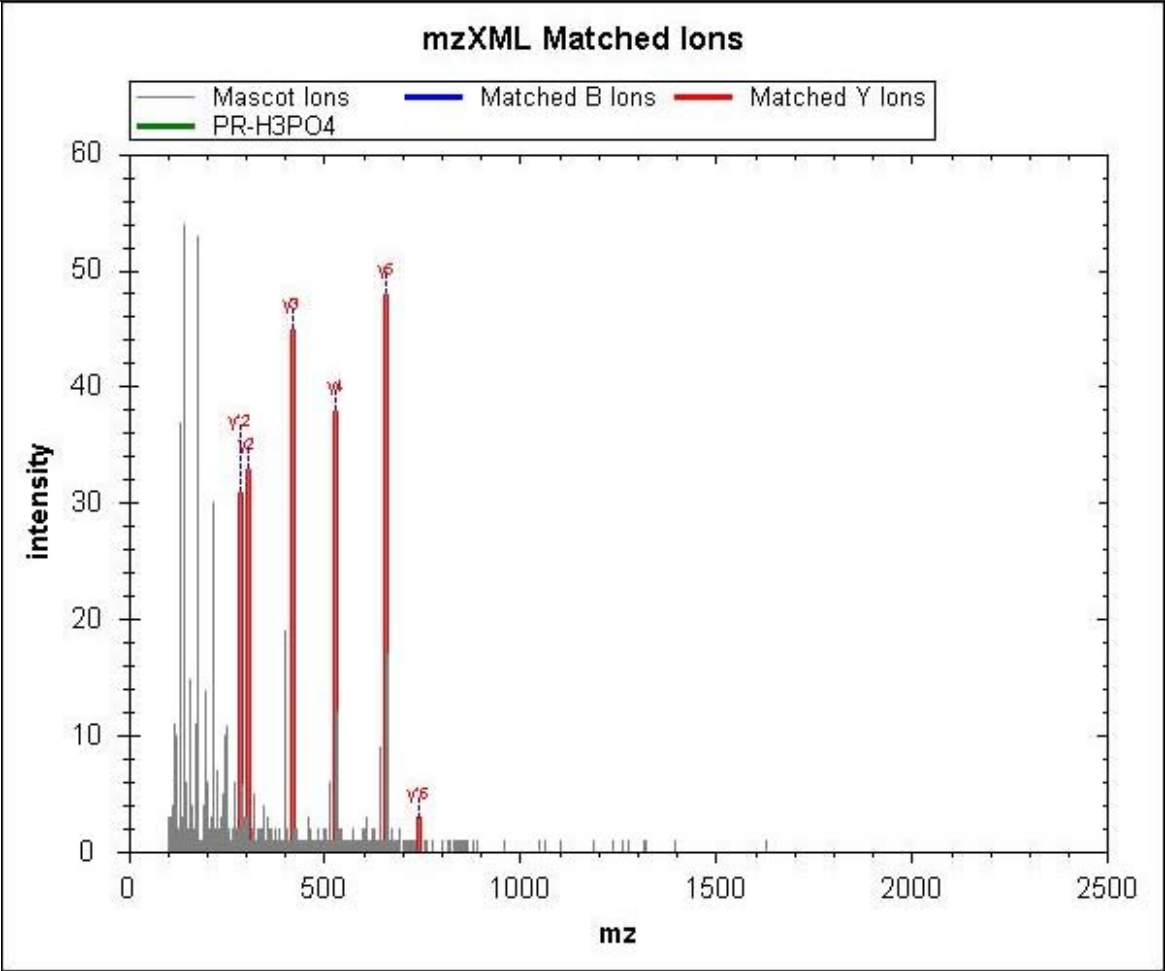

Protein index=699, ACC No:IPI00375685

Peptide index=5926 MS/MS spectrum

Sequence: FNFFALLPHQR, m/z:695.374, charge:+ 2, Modification: , Mod Position:

Score: 40.28, Raw data:WET\_A3\_090615\_02.mzxml, MS/MS Elution time: 80.0185, Scan number:4425, Mass delta:-0.0019, Rank:1

| No | b | b++ | b* | b*++ | Seq | y | y++ | y* | y*++ | RevNo |
|----|---|-----|----|------|-----|---|-----|----|------|-------|
|----|---|-----|----|------|-----|---|-----|----|------|-------|

|    |         |        |         |        |   |         |        |         |        |    |
|----|---------|--------|---------|--------|---|---------|--------|---------|--------|----|
| 1  | 148.08  | 74.54  |         |        | F |         |        |         |        | 11 |
| 2  | 262.12  | 131.56 | 245.09  | 123.05 | N | 1242.67 | 621.84 | 1225.65 | 613.33 | 10 |
| 3  | 409.19  | 205.1  | 392.16  | 196.58 | F | 1128.63 | 564.82 | 1111.6  | 556.31 | 9  |
| 4  | 556.26  | 278.63 | 539.23  | 270.12 | F | 981.56  | 491.29 | 964.54  | 482.77 | 8  |
| 5  | 627.29  | 314.15 | 610.27  | 305.64 | A | 834.49  | 417.75 | 817.47  | 409.24 | 7  |
| 6  | 740.38  | 370.69 | 723.35  | 362.18 | L | 763.46  | 382.23 | 746.43  | 373.72 | 6  |
| 7  | 853.46  | 427.23 | 836.43  | 418.72 | L | 650.37  | 325.69 | 633.35  | 317.18 | 5  |
| 8  | 950.51  | 475.76 | 933.49  | 467.25 | P | 537.29  | 269.15 | 520.26  | 260.63 | 4  |
| 9  | 1087.57 | 544.29 | 1070.55 | 535.78 | H | 440.24  | 220.62 | 423.21  | 212.11 | 3  |
| 10 | 1215.63 | 608.32 | 1198.6  | 599.81 | Q | 303.18  | 152.09 | 286.15  | 143.58 | 2  |
| 11 |         |        |         |        | R | 175.12  | 88.06  | 158.09  | 79.55  | 1  |

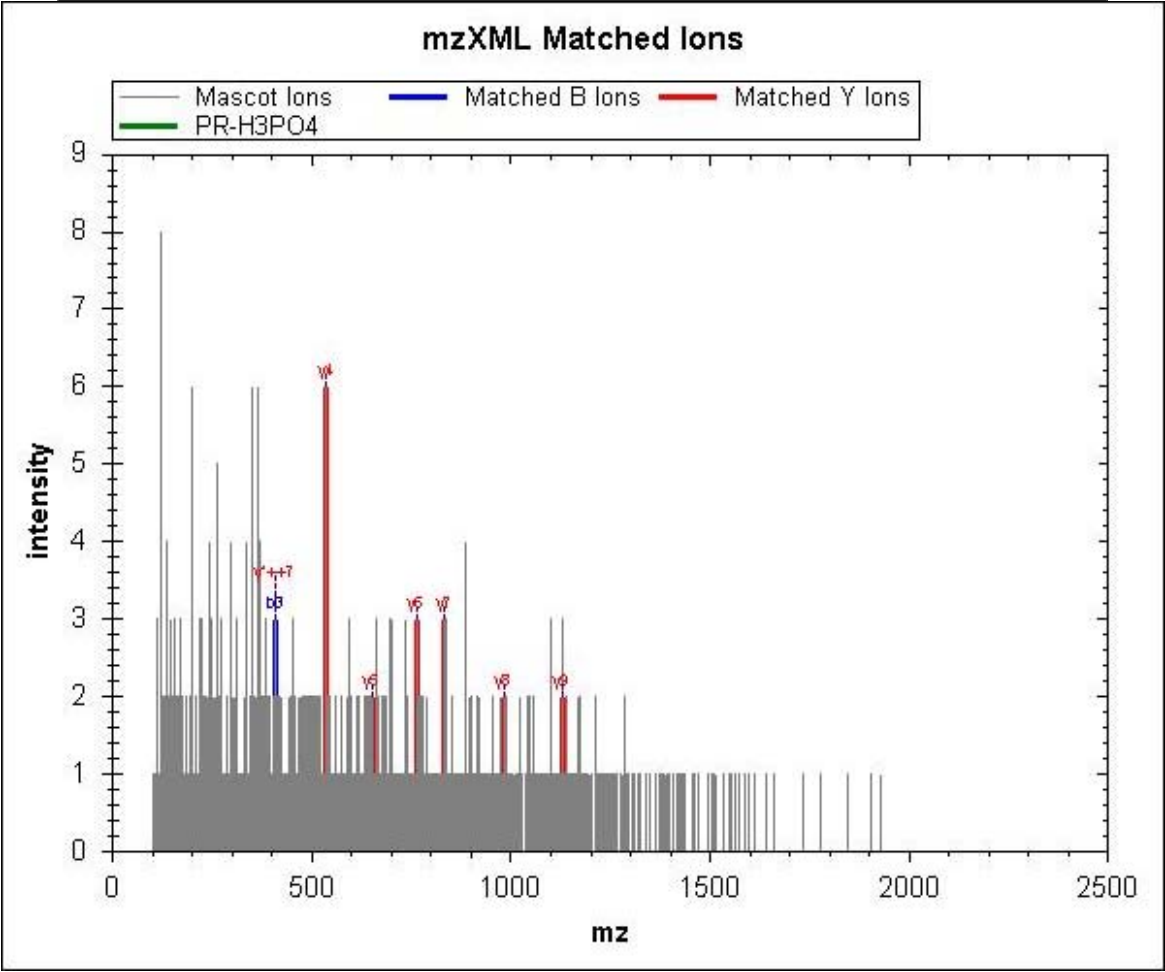

Protein index=700, ACC No:IP100328361

Peptide index=972 MS/MS spectrum

Sequence: LPNQTHPDVPVGDESQAR, m/z:653.9854, charge:+ 3, Modification: , Mod Position:

Score: 55.05, Raw data:WET\_A3\_090615\_02.mzxml, MS/MS Elution time: 27.75183, Scan number:1389, Mass delta:-0.0103, Rank:1

| No | b      | b++   | b* | b*++ | b0 | b0++ | Seq | y | y++ | y* | y*++ | y0 | y0++ | RevNo |
|----|--------|-------|----|------|----|------|-----|---|-----|----|------|----|------|-------|
| 1  | 114.09 | 57.55 |    |      |    |      | L   |   |     |    |      |    |      | 18    |

|    |         |        |         |        |         |        |   |         |        |         |        |         |        |    |
|----|---------|--------|---------|--------|---------|--------|---|---------|--------|---------|--------|---------|--------|----|
| 2  | 211.14  | 106.08 |         |        |         |        | P | 1846.87 | 923.94 | 1829.84 | 915.42 | 1828.86 | 914.93 | 17 |
| 3  | 325.19  | 163.1  | 308.16  | 154.58 |         |        | N | 1749.82 | 875.41 | 1732.79 | 866.9  | 1731.8  | 866.41 | 16 |
| 4  | 453.25  | 227.13 | 436.22  | 218.61 |         |        | Q | 1635.77 | 818.39 | 1618.75 | 809.88 | 1617.76 | 809.38 | 15 |
| 5  | 554.29  | 277.65 | 537.27  | 269.14 | 536.28  | 268.64 | T | 1507.71 | 754.36 | 1490.69 | 745.85 | 1489.7  | 745.36 | 14 |
| 6  | 691.35  | 346.18 | 674.33  | 337.67 | 673.34  | 337.17 | H | 1406.67 | 703.84 | 1389.64 | 695.32 | 1388.66 | 694.83 | 13 |
| 7  | 788.4   | 394.71 | 771.38  | 386.19 | 770.39  | 385.7  | P | 1269.61 | 635.31 | 1252.58 | 626.79 | 1251.6  | 626.3  | 12 |
| 8  | 903.43  | 452.22 | 886.41  | 443.71 | 885.42  | 443.21 | D | 1172.55 | 586.78 | 1155.53 | 578.27 | 1154.54 | 577.78 | 11 |
| 9  | 1002.5  | 501.75 | 985.47  | 493.24 | 984.49  | 492.75 | V | 1057.53 | 529.27 | 1040.5  | 520.75 | 1039.52 | 520.26 | 10 |
| 10 | 1099.55 | 550.28 | 1082.53 | 541.77 | 1081.54 | 541.27 | P | 958.46  | 479.73 | 941.43  | 471.22 | 940.45  | 470.73 | 9  |
| 11 | 1198.62 | 599.81 | 1181.59 | 591.3  | 1180.61 | 590.81 | V | 861.41  | 431.21 | 844.38  | 422.69 | 843.4   | 422.2  | 8  |
| 12 | 1255.64 | 628.33 | 1238.62 | 619.81 | 1237.63 | 619.32 | G | 762.34  | 381.67 | 745.31  | 373.16 | 744.33  | 372.67 | 7  |
| 13 | 1370.67 | 685.84 | 1353.64 | 677.33 | 1352.66 | 676.83 | D | 705.32  | 353.16 | 688.29  | 344.65 | 687.31  | 344.16 | 6  |
| 14 | 1499.71 | 750.36 | 1482.69 | 741.85 | 1481.7  | 741.35 | E | 590.29  | 295.65 | 573.26  | 287.13 | 572.28  | 286.64 | 5  |
| 15 | 1586.74 | 793.88 | 1569.72 | 785.36 | 1568.73 | 784.87 | S | 461.25  | 231.13 | 444.22  | 222.61 | 443.24  | 222.12 | 4  |
| 16 | 1714.8  | 857.91 | 1697.78 | 849.39 | 1696.79 | 848.9  | Q | 374.21  | 187.61 | 357.19  | 179.1  |         |        | 3  |
| 17 | 1785.84 | 893.42 | 1768.81 | 884.91 | 1767.83 | 884.42 | A | 246.16  | 123.58 | 229.13  | 115.07 |         |        | 2  |
| 18 |         |        |         |        |         |        | R | 175.12  | 88.06  | 158.09  | 79.55  |         |        | 1  |

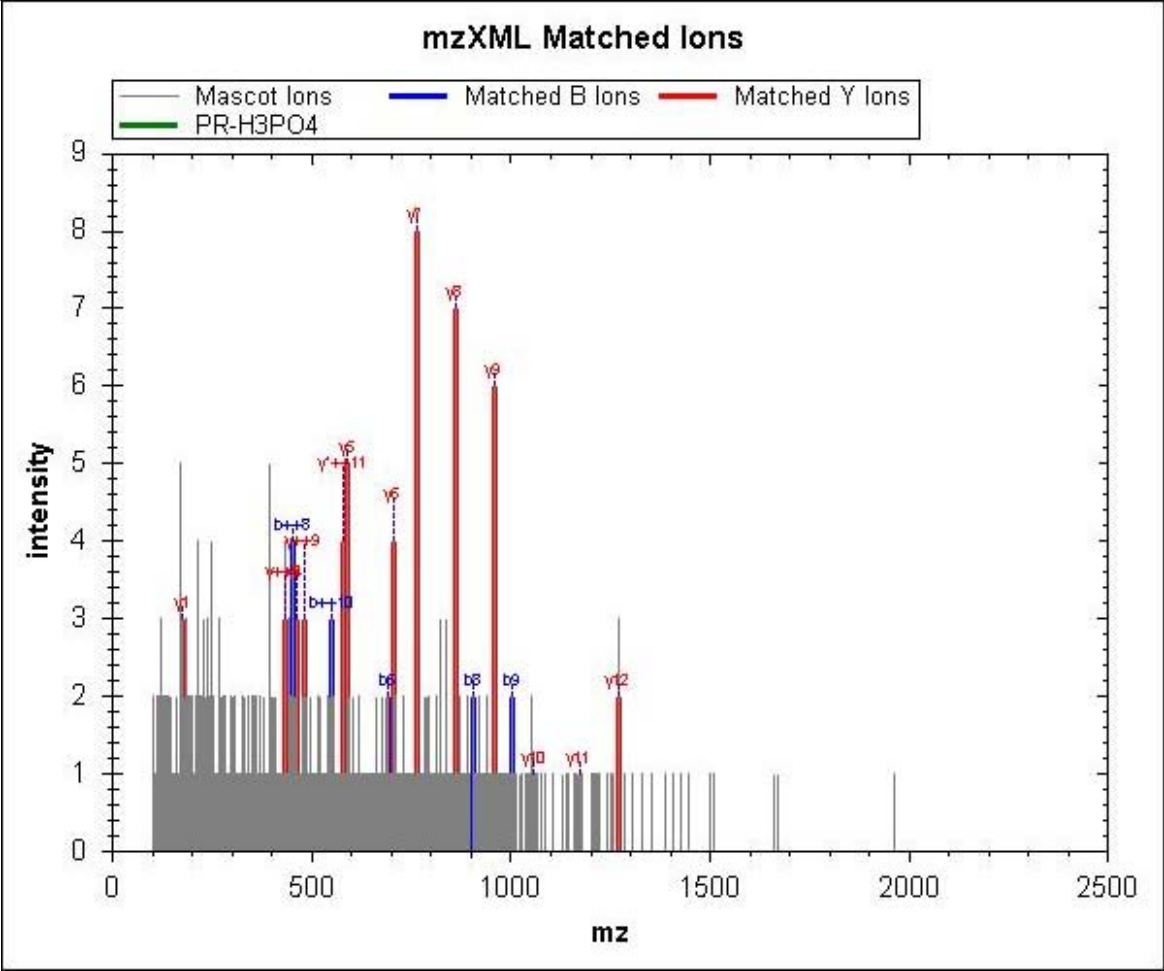

Protein index=701, ACC No:IPI00009505

Peptide index=5577 MS/MS spectrum

Sequence: AGLVELLLR, m/z:492.3184, charge:+ 2, Modification: , Mod Position:

Score: 50.16, Raw data:WET\_A3\_090615\_02.mzxml, MS/MS Elution time: 75.4775, Scan number:4161, Mass delta:0.0048, Rank:1

| No | b      | b++    | b0     | b0++   | Seq | y      | y++    | y*     | y*++   | y0     | y0++   | RevNo |
|----|--------|--------|--------|--------|-----|--------|--------|--------|--------|--------|--------|-------|
| 1  | 72.04  | 36.53  |        |        | A   |        |        |        |        |        |        | 9     |
| 2  | 129.07 | 65.04  |        |        | G   | 912.59 | 456.8  | 895.56 | 448.28 | 894.58 | 447.79 | 8     |
| 3  | 242.15 | 121.58 |        |        | L   | 855.57 | 428.29 | 838.54 | 419.77 | 837.56 | 419.28 | 7     |
| 4  | 341.22 | 171.11 |        |        | V   | 742.48 | 371.74 | 725.46 | 363.23 | 724.47 | 362.74 | 6     |
| 5  | 470.26 | 235.63 | 452.25 | 226.63 | E   | 643.41 | 322.21 | 626.39 | 313.7  | 625.4  | 313.21 | 5     |
| 6  | 583.34 | 292.18 | 565.33 | 283.17 | L   | 514.37 | 257.69 | 497.34 | 249.18 |        |        | 4     |
| 7  | 696.43 | 348.72 | 678.42 | 339.71 | L   | 401.29 | 201.15 | 384.26 | 192.63 |        |        | 3     |
| 8  | 809.51 | 405.26 | 791.5  | 396.25 | L   | 288.2  | 144.61 | 271.18 | 136.09 |        |        | 2     |
| 9  |        |        |        |        | R   | 175.12 | 88.06  | 158.09 | 79.55  |        |        | 1     |

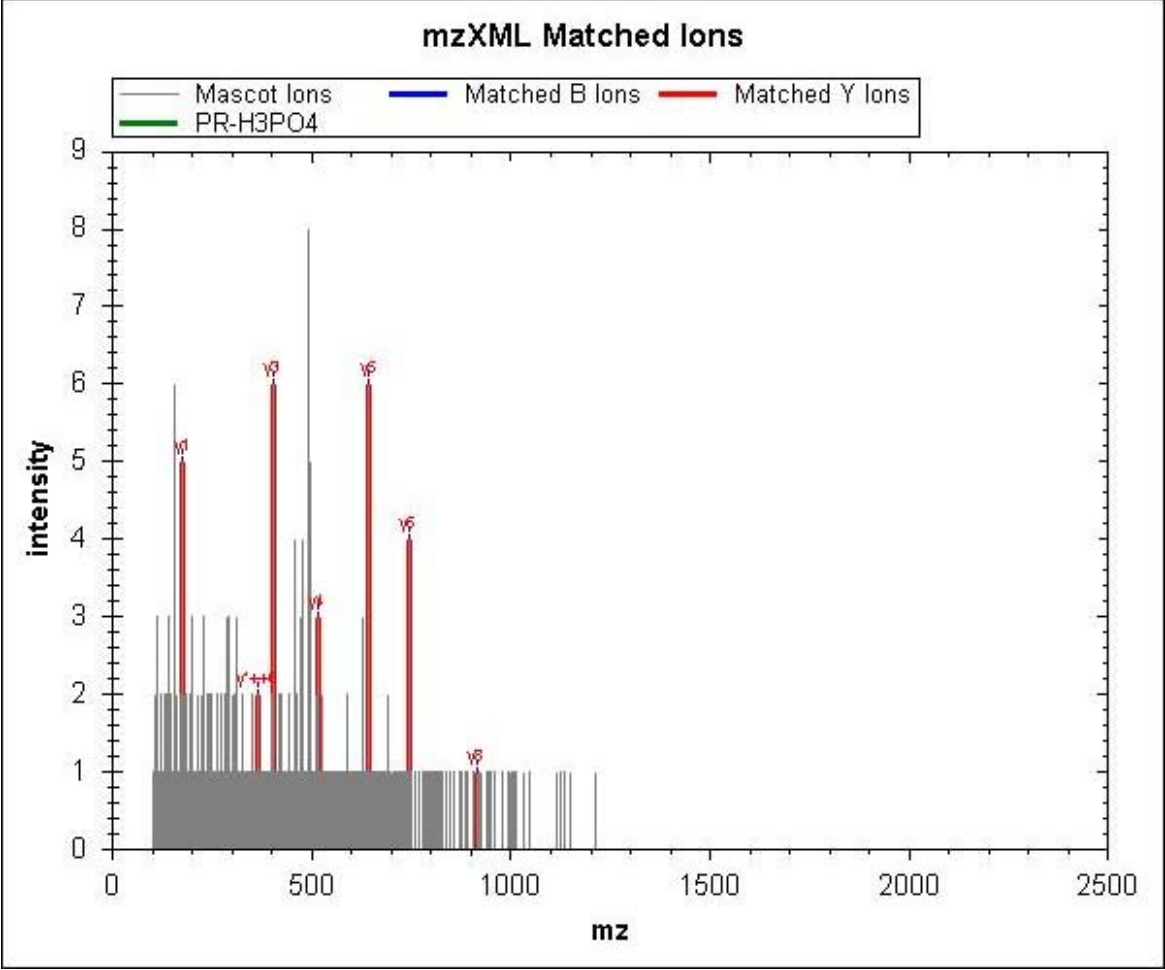

Protein index=702, ACC No:IP100014849

Peptide index=2373 MS/MS spectrum

Sequence: ISDLGGGVPLR, m/z:542.2922, charge:+ 2, Modification: , Mod Position:

Score: 38.27, Raw data:WET\_A3\_090615\_03.mzxml, MS/MS Elution time: 43.5475, Scan number:2307, Mass delta:-0.0348, Rank:1

| No | b      | b++    | b0     | b0++   | Seq | y      | y++    | y*     | y*++   | y0     | y0++   | RevNo |
|----|--------|--------|--------|--------|-----|--------|--------|--------|--------|--------|--------|-------|
| 1  | 114.09 | 57.55  |        |        | I   |        |        |        |        |        |        | 11    |
| 2  | 201.12 | 101.07 | 183.11 | 92.06  | S   | 970.53 | 485.77 | 953.51 | 477.26 | 952.52 | 476.76 | 10    |
| 3  | 316.15 | 158.58 | 298.14 | 149.57 | D   | 883.5  | 442.25 | 866.47 | 433.74 | 865.49 | 433.25 | 9     |
| 4  | 429.23 | 215.12 | 411.22 | 206.12 | L   | 768.47 | 384.74 | 751.45 | 376.23 |        |        | 8     |
| 5  | 486.26 | 243.63 | 468.25 | 234.63 | G   | 655.39 | 328.2  | 638.36 | 319.68 |        |        | 7     |
| 6  | 543.28 | 272.14 | 525.27 | 263.14 | G   | 598.37 | 299.69 | 581.34 | 291.17 |        |        | 6     |
| 7  | 600.3  | 300.65 | 582.29 | 291.65 | G   | 541.35 | 271.18 | 524.32 | 262.66 |        |        | 5     |
| 8  | 699.37 | 350.19 | 681.36 | 341.18 | V   | 484.32 | 242.67 | 467.3  | 234.15 |        |        | 4     |
| 9  | 796.42 | 398.71 | 778.41 | 389.71 | P   | 385.26 | 193.13 | 368.23 | 184.62 |        |        | 3     |
| 10 | 909.5  | 455.26 | 891.49 | 446.25 | L   | 288.2  | 144.61 | 271.18 | 136.09 |        |        | 2     |
| 11 |        |        |        |        | R   | 175.12 | 88.06  | 158.09 | 79.55  |        |        | 1     |

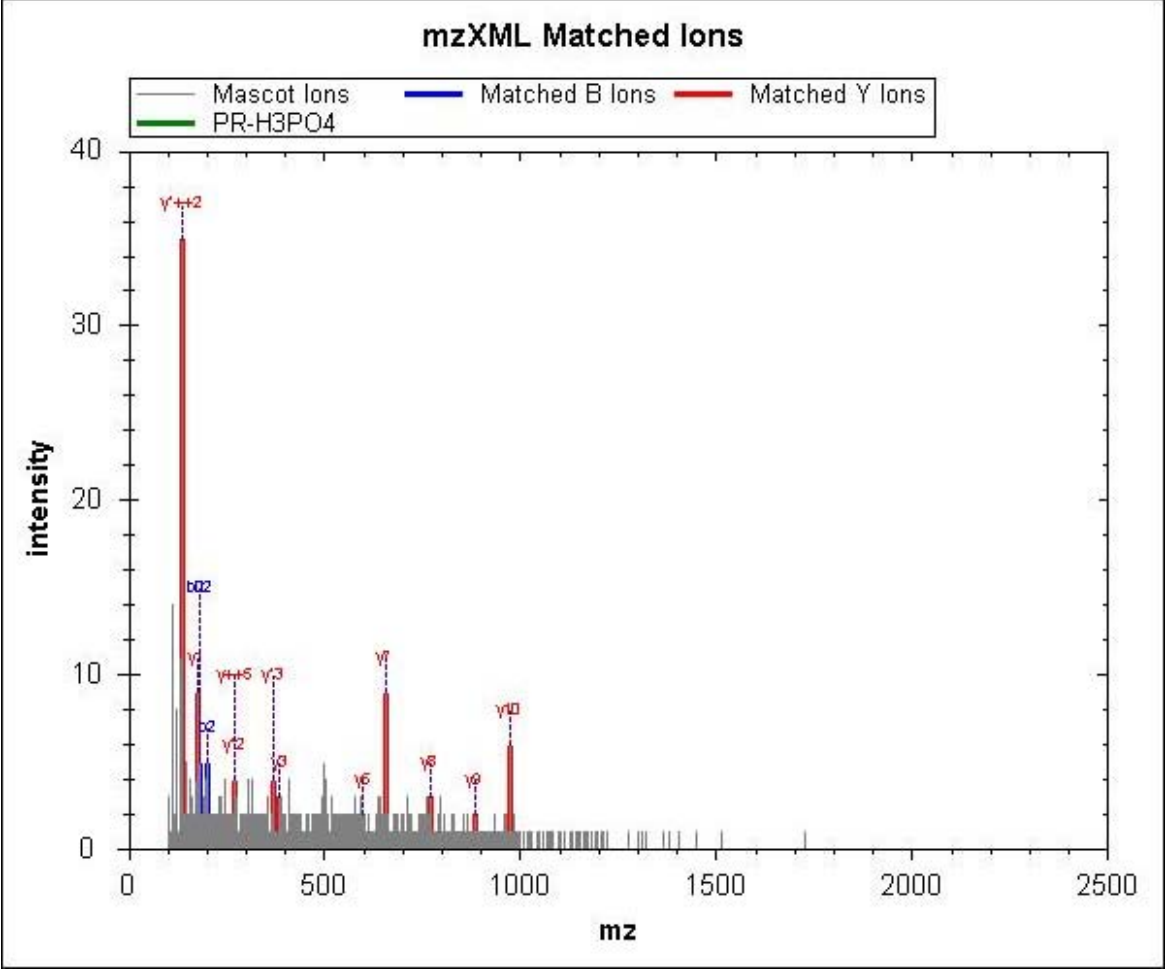

Protein index=703, ACC No: IPI00103525

Peptide index=6526 MS/MS spectrum

Sequence: NLSPVVSNELLEQAFSQFGPVEK, m/z:1266.655, charge:+ 2, Modification: , Mod Position:  
Score: 73.27, Raw data:WET\_B3\_090616\_03.mzxml, MS/MS Elution time: 90.29, Scan number:5041, Mass delta:-0.0011, Rank:1

| No | b       | b++     | b*      | b*++    | b0      | b0++    | Seq | y       | y++     | y*      | y*++    | y0      | y0++    | RevNo |
|----|---------|---------|---------|---------|---------|---------|-----|---------|---------|---------|---------|---------|---------|-------|
| 1  | 115.05  | 58.03   | 98.02   | 49.52   |         |         | N   |         |         |         |         |         |         | 23    |
| 2  | 228.13  | 114.57  | 211.11  | 106.06  |         |         | L   | 2418.26 | 1209.63 | 2401.23 | 1201.12 | 2400.24 | 1200.63 | 22    |
| 3  | 315.17  | 158.09  | 298.14  | 149.57  | 297.16  | 149.08  | S   | 2305.17 | 1153.09 | 2288.14 | 1144.58 | 2287.16 | 1144.08 | 21    |
| 4  | 412.22  | 206.61  | 395.19  | 198.1   | 394.21  | 197.61  | P   | 2218.14 | 1109.57 | 2201.11 | 1101.06 | 2200.13 | 1100.57 | 20    |
| 5  | 511.29  | 256.15  | 494.26  | 247.63  | 493.28  | 247.14  | V   | 2121.09 | 1061.05 | 2104.06 | 1052.53 | 2103.08 | 1052.04 | 19    |
| 6  | 610.36  | 305.68  | 593.33  | 297.17  | 592.35  | 296.68  | V   | 2022.02 | 1011.51 | 2004.99 | 1003    | 2004.01 | 1002.51 | 18    |
| 7  | 697.39  | 349.2   | 680.36  | 340.68  | 679.38  | 340.19  | S   | 1922.95 | 961.98  | 1905.92 | 953.47  | 1904.94 | 952.97  | 17    |
| 8  | 811.43  | 406.22  | 794.4   | 397.71  | 793.42  | 397.21  | N   | 1835.92 | 918.46  | 1818.89 | 909.95  | 1817.91 | 909.46  | 16    |
| 9  | 940.47  | 470.74  | 923.45  | 462.23  | 922.46  | 461.74  | E   | 1721.87 | 861.44  | 1704.85 | 852.93  | 1703.86 | 852.44  | 15    |
| 10 | 1053.56 | 527.28  | 1036.53 | 518.77  | 1035.55 | 518.28  | L   | 1592.83 | 796.92  | 1575.81 | 788.41  | 1574.82 | 787.91  | 14    |
| 11 | 1166.64 | 583.82  | 1149.62 | 575.31  | 1148.63 | 574.82  | L   | 1479.75 | 740.38  | 1462.72 | 731.86  | 1461.74 | 731.37  | 13    |
| 12 | 1295.68 | 648.35  | 1278.66 | 639.83  | 1277.67 | 639.34  | E   | 1366.66 | 683.84  | 1349.64 | 675.32  | 1348.65 | 674.83  | 12    |
| 13 | 1423.74 | 712.38  | 1406.72 | 703.86  | 1405.73 | 703.37  | Q   | 1237.62 | 619.31  | 1220.59 | 610.8   | 1219.61 | 610.31  | 11    |
| 14 | 1494.78 | 747.89  | 1477.75 | 739.38  | 1476.77 | 738.89  | A   | 1109.56 | 555.28  | 1092.54 | 546.77  | 1091.55 | 546.28  | 10    |
| 15 | 1641.85 | 821.43  | 1624.82 | 812.91  | 1623.84 | 812.42  | F   | 1038.53 | 519.77  | 1021.5  | 511.25  | 1020.51 | 510.76  | 9     |
| 16 | 1728.88 | 864.94  | 1711.85 | 856.43  | 1710.87 | 855.94  | S   | 891.46  | 446.23  | 874.43  | 437.72  | 873.45  | 437.23  | 8     |
| 17 | 1856.94 | 928.97  | 1839.91 | 920.46  | 1838.93 | 919.97  | Q   | 804.43  | 402.72  | 787.4   | 394.2   | 786.41  | 393.71  | 7     |
| 18 | 2004.01 | 1002.51 | 1986.98 | 993.99  | 1986    | 993.5   | F   | 676.37  | 338.69  | 659.34  | 330.17  | 658.36  | 329.68  | 6     |
| 19 | 2061.03 | 1031.02 | 2044    | 1022.5  | 2043.02 | 1022.01 | G   | 529.3   | 265.15  | 512.27  | 256.64  | 511.29  | 256.15  | 5     |
| 20 | 2158.08 | 1079.54 | 2141.05 | 1071.03 | 2140.07 | 1070.54 | P   | 472.28  | 236.64  | 455.25  | 228.13  | 454.27  | 227.64  | 4     |
| 21 | 2257.15 | 1129.08 | 2240.12 | 1120.57 | 2239.14 | 1120.07 | V   | 375.22  | 188.12  | 358.2   | 179.6   | 357.21  | 179.11  | 3     |
| 22 | 2386.19 | 1193.6  | 2369.17 | 1185.09 | 2368.18 | 1184.59 | E   | 276.16  | 138.58  | 259.13  | 130.07  | 258.14  | 129.58  | 2     |
| 23 |         |         |         |         |         |         | K   | 147.11  | 74.06   | 130.09  | 65.55   |         |         | 1     |

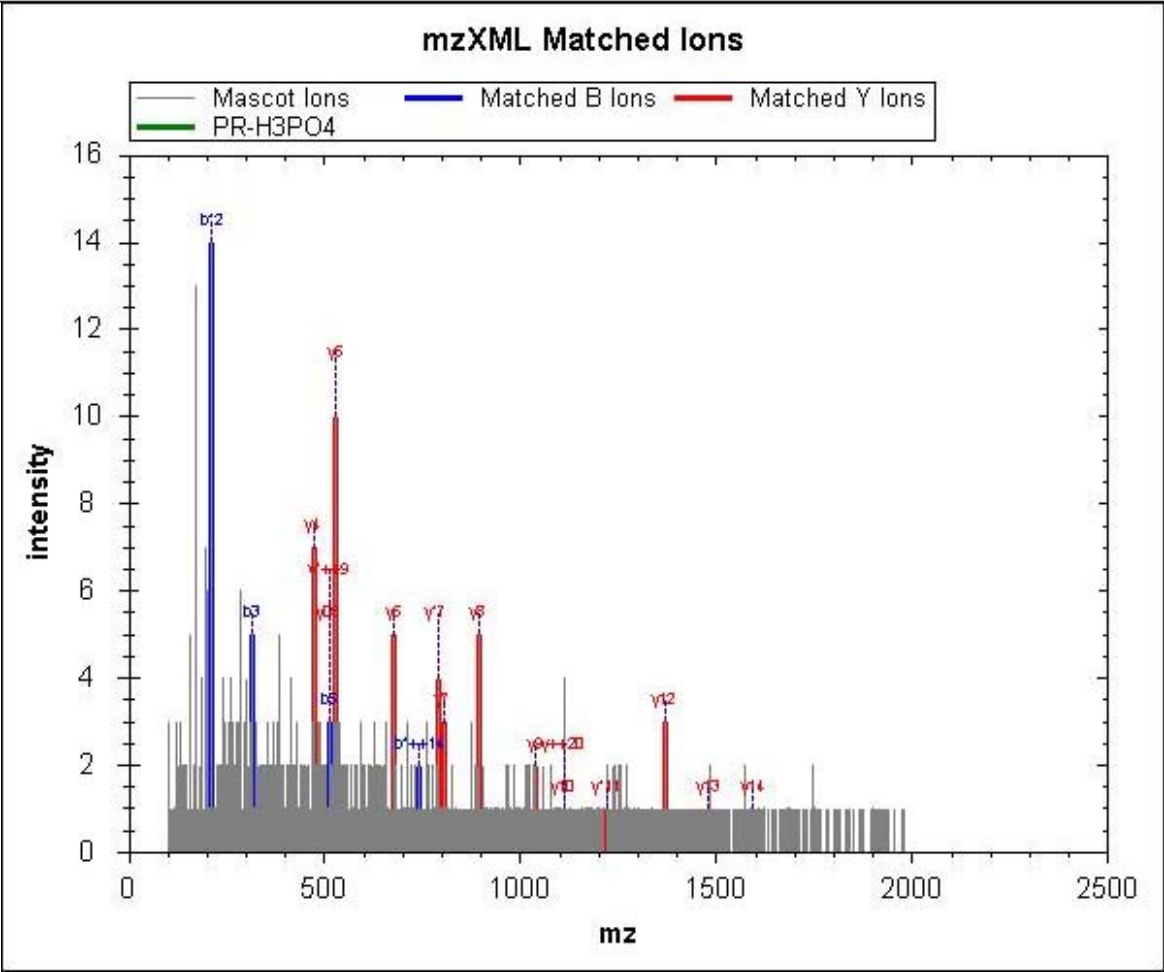

Protein index=704, ACC No:IPI00000948

Peptide index=5564 MS/MS spectrum

Sequence: AFIVWLANGDTLR, m/z:738.4062, charge:+ 2, Modification: , Mod Position:

Score: 58.55, Raw data:WET\_A3\_090615\_03.mzxml, MS/MS Elution time: 75.15817, Scan number:4158, Mass delta:0.003, Rank:1

| No | b       | b++    | b*      | b*++   | b0      | b0++   | Seq | y       | y++    | y*      | y*++   | y0      | y0++   | RevNo |
|----|---------|--------|---------|--------|---------|--------|-----|---------|--------|---------|--------|---------|--------|-------|
| 1  | 72.04   | 36.53  |         |        |         |        | A   |         |        |         |        |         |        | 13    |
| 2  | 219.11  | 110.06 |         |        |         |        | F   | 1404.76 | 702.89 | 1387.74 | 694.37 | 1386.75 | 693.88 | 12    |
| 3  | 332.2   | 166.6  |         |        |         |        | I   | 1257.69 | 629.35 | 1240.67 | 620.84 | 1239.68 | 620.35 | 11    |
| 4  | 431.27  | 216.14 |         |        |         |        | V   | 1144.61 | 572.81 | 1127.58 | 564.3  | 1126.6  | 563.8  | 10    |
| 5  | 617.34  | 309.18 |         |        |         |        | W   | 1045.54 | 523.27 | 1028.52 | 514.76 | 1027.53 | 514.27 | 9     |
| 6  | 730.43  | 365.72 |         |        |         |        | L   | 859.46  | 430.24 | 842.44  | 421.72 | 841.45  | 421.23 | 8     |
| 7  | 801.47  | 401.24 |         |        |         |        | A   | 746.38  | 373.69 | 729.35  | 365.18 | 728.37  | 364.69 | 7     |
| 8  | 915.51  | 458.26 | 898.48  | 449.74 |         |        | N   | 675.34  | 338.17 | 658.32  | 329.66 | 657.33  | 329.17 | 6     |
| 9  | 972.53  | 486.77 | 955.5   | 478.26 |         |        | G   | 561.3   | 281.15 | 544.27  | 272.64 | 543.29  | 272.15 | 5     |
| 10 | 1087.56 | 544.28 | 1070.53 | 535.77 | 1069.55 | 535.28 | D   | 504.28  | 252.64 | 487.25  | 244.13 | 486.27  | 243.64 | 4     |
| 11 | 1188.6  | 594.81 | 1171.58 | 586.29 | 1170.59 | 585.8  | T   | 389.25  | 195.13 | 372.22  | 186.62 | 371.24  | 186.12 | 3     |
| 12 | 1301.69 | 651.35 | 1284.66 | 642.83 | 1283.68 | 642.34 | L   | 288.2   | 144.61 | 271.18  | 136.09 |         |        | 2     |

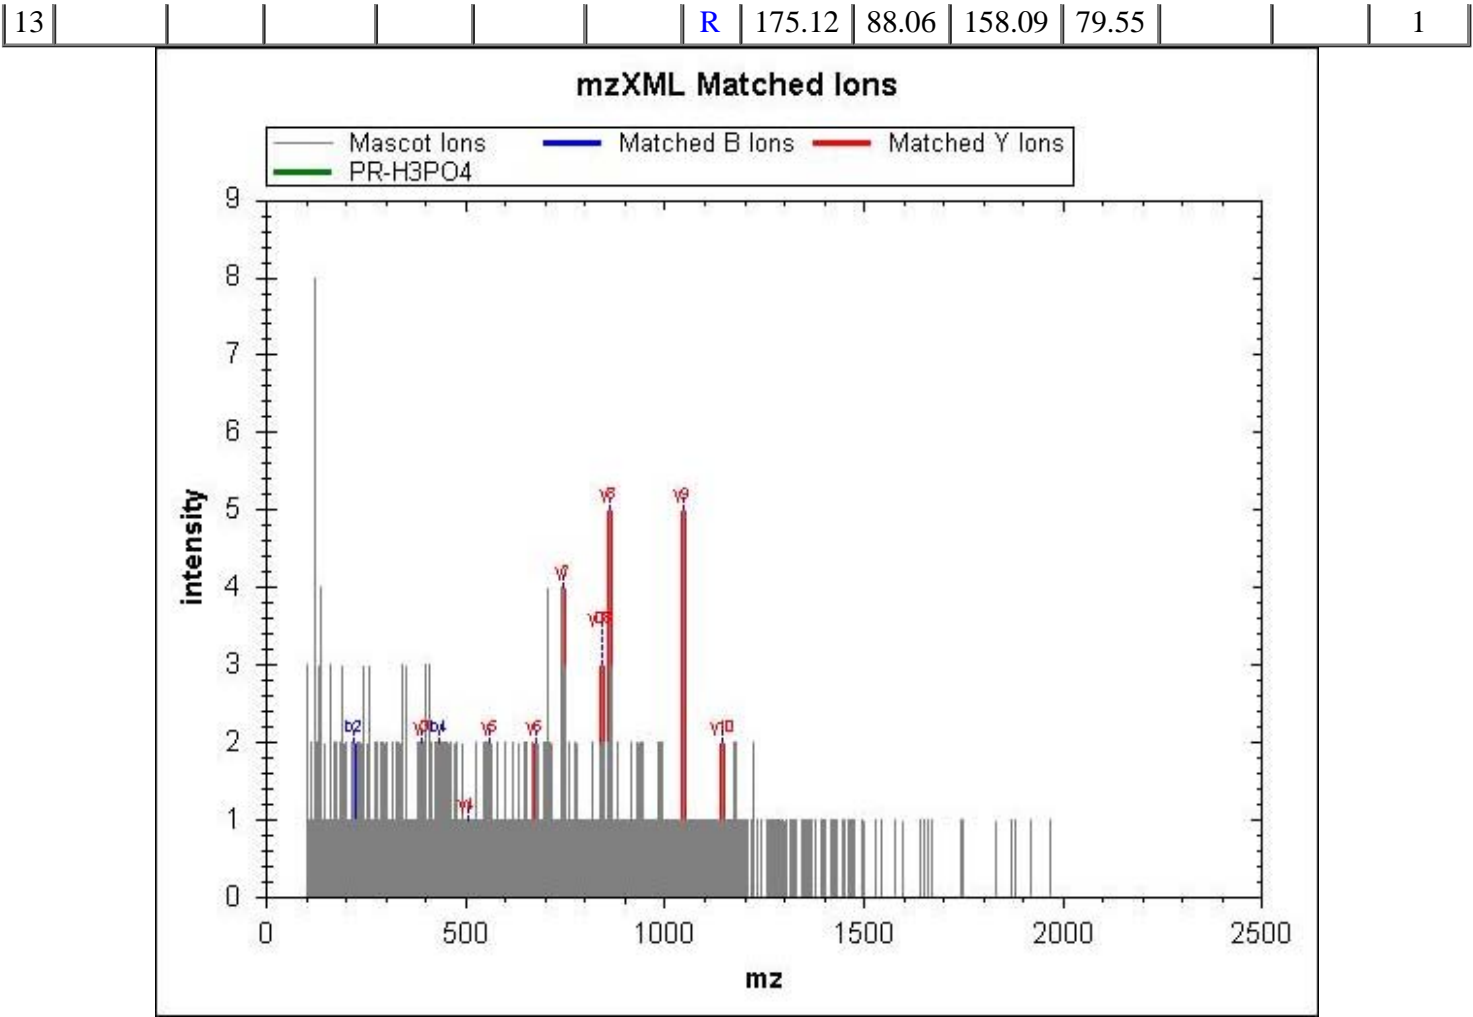

Protein index=712, ACC No:IPI00556080

Peptide index=5472 MS/MS spectrum

Sequence: GPALLVLGPDAIQLR, m/z:766.9566, charge:+ 2, Modification: , Mod Position:

Score: 52.68, Raw data:WET\_B3\_090616\_01.mzxml, MS/MS Elution time: 74.09633, Scan number:4070, Mass delta:-0.0097, Rank:1

| No | b       | b++    | b* | b*++ | b0     | b0++   | Seq | y       | y++    | y*      | y*++   | y0      | y0++   | RevNo |
|----|---------|--------|----|------|--------|--------|-----|---------|--------|---------|--------|---------|--------|-------|
| 1  | 58.03   | 29.52  |    |      |        |        | G   |         |        |         |        |         |        | 15    |
| 2  | 155.08  | 78.04  |    |      |        |        | P   | 1475.89 | 738.45 | 1458.87 | 729.94 | 1457.88 | 729.45 | 14    |
| 3  | 226.12  | 113.56 |    |      |        |        | A   | 1378.84 | 689.92 | 1361.82 | 681.41 | 1360.83 | 680.92 | 13    |
| 4  | 339.2   | 170.1  |    |      |        |        | L   | 1307.8  | 654.41 | 1290.78 | 645.89 | 1289.79 | 645.4  | 12    |
| 5  | 452.29  | 226.65 |    |      |        |        | L   | 1194.72 | 597.86 | 1177.69 | 589.35 | 1176.71 | 588.86 | 11    |
| 6  | 551.36  | 276.18 |    |      |        |        | V   | 1081.64 | 541.32 | 1064.61 | 532.81 | 1063.63 | 532.32 | 10    |
| 7  | 664.44  | 332.72 |    |      |        |        | L   | 982.57  | 491.79 | 965.54  | 483.27 | 964.56  | 482.78 | 9     |
| 8  | 721.46  | 361.23 |    |      |        |        | G   | 869.48  | 435.25 | 852.46  | 426.73 | 851.47  | 426.24 | 8     |
| 9  | 818.51  | 409.76 |    |      |        |        | P   | 812.46  | 406.73 | 795.44  | 398.22 | 794.45  | 397.73 | 7     |
| 10 | 933.54  | 467.27 |    |      | 915.53 | 458.27 | D   | 715.41  | 358.21 | 698.38  | 349.7  | 697.4   | 349.2  | 6     |
| 11 | 1004.58 | 502.79 |    |      | 986.57 | 493.79 | A   | 600.38  | 300.7  | 583.36  | 292.18 |         |        | 5     |

|    |         |        |         |        |         |        |   |        |        |        |        |  |  |   |
|----|---------|--------|---------|--------|---------|--------|---|--------|--------|--------|--------|--|--|---|
| 12 | 1117.66 | 559.33 |         |        | 1099.65 | 550.33 | I | 529.35 | 265.18 | 512.32 | 256.66 |  |  | 4 |
| 13 | 1245.72 | 623.36 | 1228.69 | 614.85 | 1227.71 | 614.36 | Q | 416.26 | 208.63 | 399.24 | 200.12 |  |  | 3 |
| 14 | 1358.8  | 679.91 | 1341.78 | 671.39 | 1340.79 | 670.9  | L | 288.2  | 144.61 | 271.18 | 136.09 |  |  | 2 |
| 15 |         |        |         |        |         |        | R | 175.12 | 88.06  | 158.09 | 79.55  |  |  | 1 |

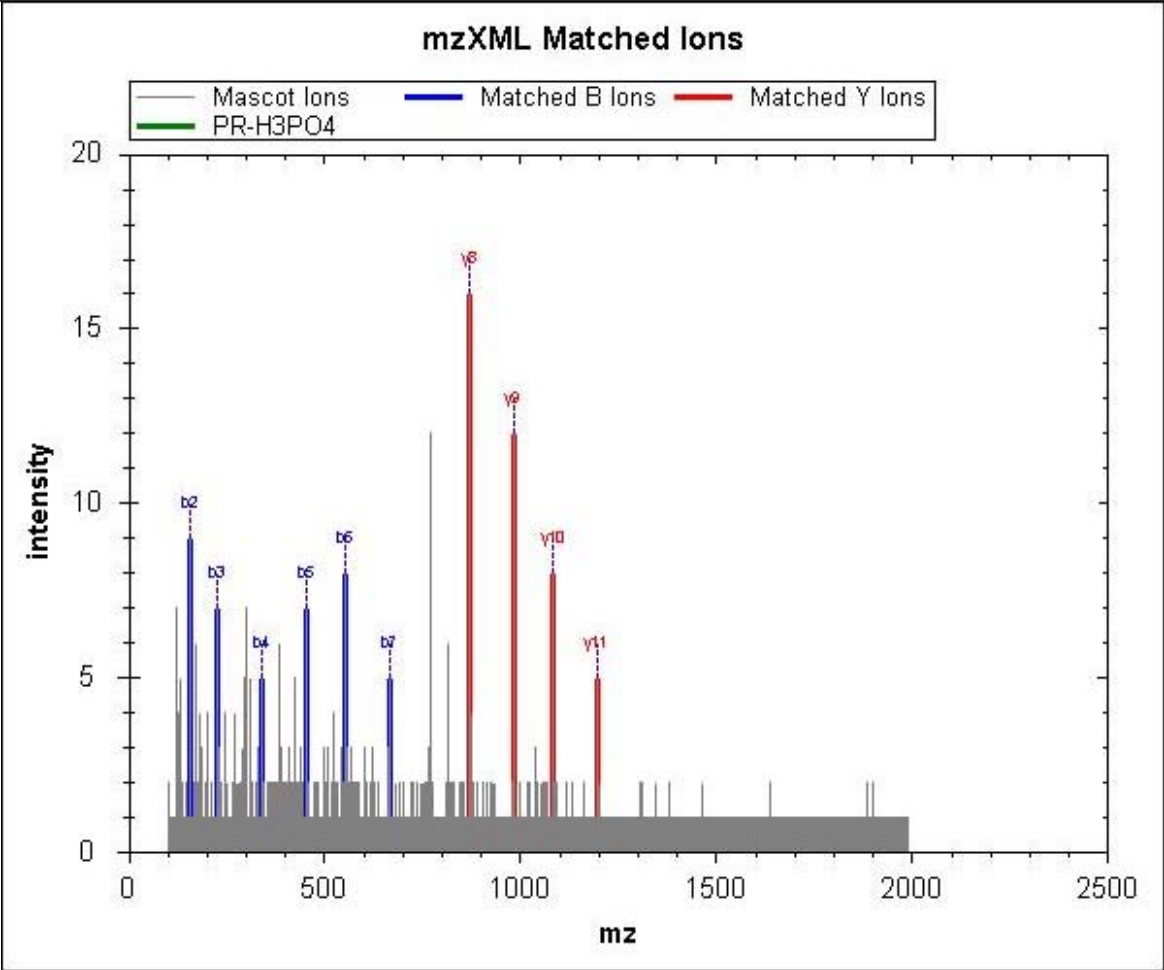

Protein index=715, ACC No:IPI00029468

Peptide index=6301 MS/MS spectrum

Sequence: TLFSNIVLSGGSTLFK, m/z:842.4687, charge:+ 2, Modification: , Mod Position:

Score: 59.79, Raw data:WET\_B3\_090616\_01.mzxml, MS/MS Elution time: 85.707, Scan number:4744, Mass delta:-0.0019, Rank:1

| No | b      | b++    | b*     | b*++   | b0     | b0++   | Seq | y       | y++    | y*      | y*++   | y0      | y0++   | RevNo |
|----|--------|--------|--------|--------|--------|--------|-----|---------|--------|---------|--------|---------|--------|-------|
| 1  | 102.05 | 51.53  |        |        | 84.04  | 42.53  | T   |         |        |         |        |         |        | 16    |
| 2  | 215.14 | 108.07 |        |        | 197.13 | 99.07  | L   | 1582.88 | 791.95 | 1565.86 | 783.43 | 1564.87 | 782.94 | 15    |
| 3  | 362.21 | 181.61 |        |        | 344.2  | 172.6  | F   | 1469.8  | 735.4  | 1452.77 | 726.89 | 1451.79 | 726.4  | 14    |
| 4  | 449.24 | 225.12 |        |        | 431.23 | 216.12 | S   | 1322.73 | 661.87 | 1305.7  | 653.36 | 1304.72 | 652.86 | 13    |
| 5  | 563.28 | 282.14 | 546.26 | 273.63 | 545.27 | 273.14 | N   | 1235.7  | 618.35 | 1218.67 | 609.84 | 1217.69 | 609.35 | 12    |
| 6  | 676.37 | 338.69 | 659.34 | 330.17 | 658.36 | 329.68 | I   | 1121.66 | 561.33 | 1104.63 | 552.82 | 1103.65 | 552.33 | 11    |
| 7  | 775.43 | 388.22 | 758.41 | 379.71 | 757.42 | 379.22 | V   | 1008.57 | 504.79 | 991.55  | 496.28 | 990.56  | 495.78 | 10    |
| 8  | 888.52 | 444.76 | 871.49 | 436.25 | 870.51 | 435.76 | L   | 909.5   | 455.26 | 892.48  | 446.74 | 891.49  | 446.25 | 9     |

|    |         |        |         |        |         |        |   |        |        |        |        |        |        |   |
|----|---------|--------|---------|--------|---------|--------|---|--------|--------|--------|--------|--------|--------|---|
| 9  | 975.55  | 488.28 | 958.52  | 479.77 | 957.54  | 479.27 | S | 796.42 | 398.71 | 779.39 | 390.2  | 778.41 | 389.71 | 8 |
| 10 | 1032.57 | 516.79 | 1015.55 | 508.28 | 1014.56 | 507.78 | G | 709.39 | 355.2  | 692.36 | 346.68 | 691.38 | 346.19 | 7 |
| 11 | 1089.59 | 545.3  | 1072.57 | 536.79 | 1071.58 | 536.3  | G | 652.37 | 326.69 | 635.34 | 318.17 | 634.36 | 317.68 | 6 |
| 12 | 1176.63 | 588.82 | 1159.6  | 580.3  | 1158.62 | 579.81 | S | 595.34 | 298.18 | 578.32 | 289.66 | 577.33 | 289.17 | 5 |
| 13 | 1277.67 | 639.34 | 1260.65 | 630.83 | 1259.66 | 630.34 | T | 508.31 | 254.66 | 491.29 | 246.15 | 490.3  | 245.65 | 4 |
| 14 | 1390.76 | 695.88 | 1373.73 | 687.37 | 1372.75 | 686.88 | L | 407.27 | 204.14 | 390.24 | 195.62 |        |        | 3 |
| 15 | 1537.83 | 769.42 | 1520.8  | 760.9  | 1519.82 | 760.41 | F | 294.18 | 147.59 | 277.15 | 139.08 |        |        | 2 |
| 16 |         |        |         |        |         |        | K | 147.11 | 74.06  | 130.09 | 65.55  |        |        | 1 |

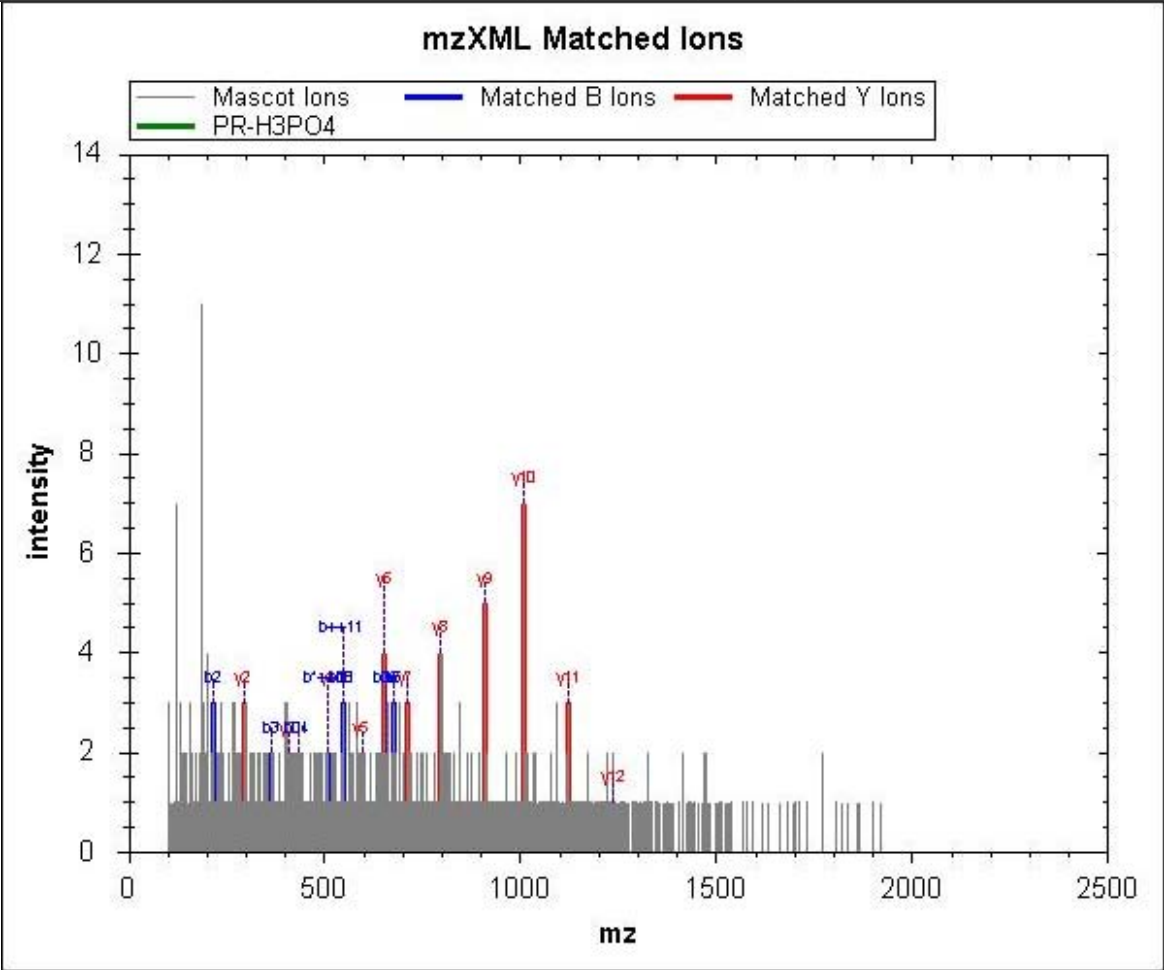

Protein index=716, ACC No:IPI00171626

Peptide index=6712 MS/MS spectrum

Sequence: TALGVAELTVTDLFR, m/z:803.4488, charge:+ 2, Modification: , Mod Position:

Score: 113.56, Raw data:WET\_A3\_090615\_02.mzxml, MS/MS Elution time: 94.588, Scan number:5271, Mass delta:0.0057, Rank:1

| No | b      | b++    | b0     | b0++   | Seq | y       | y++    | y*      | y*++   | y0      | y0++   | RevNo |
|----|--------|--------|--------|--------|-----|---------|--------|---------|--------|---------|--------|-------|
| 1  | 102.05 | 51.53  | 84.04  | 42.53  | T   |         |        |         |        |         |        | 15    |
| 2  | 173.09 | 87.05  | 155.08 | 78.04  | A   | 1504.84 | 752.92 | 1487.81 | 744.41 | 1486.83 | 743.92 | 14    |
| 3  | 286.18 | 143.59 | 268.17 | 134.59 | L   | 1433.8  | 717.4  | 1416.77 | 708.89 | 1415.79 | 708.4  | 13    |
| 4  | 343.2  | 172.1  | 325.19 | 163.1  | G   | 1320.72 | 660.86 | 1303.69 | 652.35 | 1302.71 | 651.86 | 12    |

|    |         |        |         |        |   |         |        |         |        |         |        |    |
|----|---------|--------|---------|--------|---|---------|--------|---------|--------|---------|--------|----|
| 5  | 442.27  | 221.64 | 424.26  | 212.63 | V | 1263.69 | 632.35 | 1246.67 | 623.84 | 1245.68 | 623.35 | 11 |
| 6  | 513.3   | 257.16 | 495.29  | 248.15 | A | 1164.63 | 582.82 | 1147.6  | 574.3  | 1146.62 | 573.81 | 10 |
| 7  | 642.35  | 321.68 | 624.34  | 312.67 | E | 1093.59 | 547.3  | 1076.56 | 538.78 | 1075.58 | 538.29 | 9  |
| 8  | 755.43  | 378.22 | 737.42  | 369.21 | L | 964.55  | 482.78 | 947.52  | 474.26 | 946.54  | 473.77 | 8  |
| 9  | 856.48  | 428.74 | 838.47  | 419.74 | T | 851.46  | 426.23 | 834.44  | 417.72 | 833.45  | 417.23 | 7  |
| 10 | 955.55  | 478.28 | 937.54  | 469.27 | V | 750.41  | 375.71 | 733.39  | 367.2  | 732.4   | 366.71 | 6  |
| 11 | 1056.59 | 528.8  | 1038.58 | 519.8  | T | 651.35  | 326.18 | 634.32  | 317.66 | 633.34  | 317.17 | 5  |
| 12 | 1171.62 | 586.31 | 1153.61 | 577.31 | D | 550.3   | 275.65 | 533.27  | 267.14 | 532.29  | 266.65 | 4  |
| 13 | 1284.7  | 642.86 | 1266.69 | 633.85 | L | 435.27  | 218.14 | 418.24  | 209.63 |         |        | 3  |
| 14 | 1431.77 | 716.39 | 1413.76 | 707.38 | F | 322.19  | 161.6  | 305.16  | 153.08 |         |        | 2  |
| 15 |         |        |         |        | R | 175.12  | 88.06  | 158.09  | 79.55  |         |        | 1  |

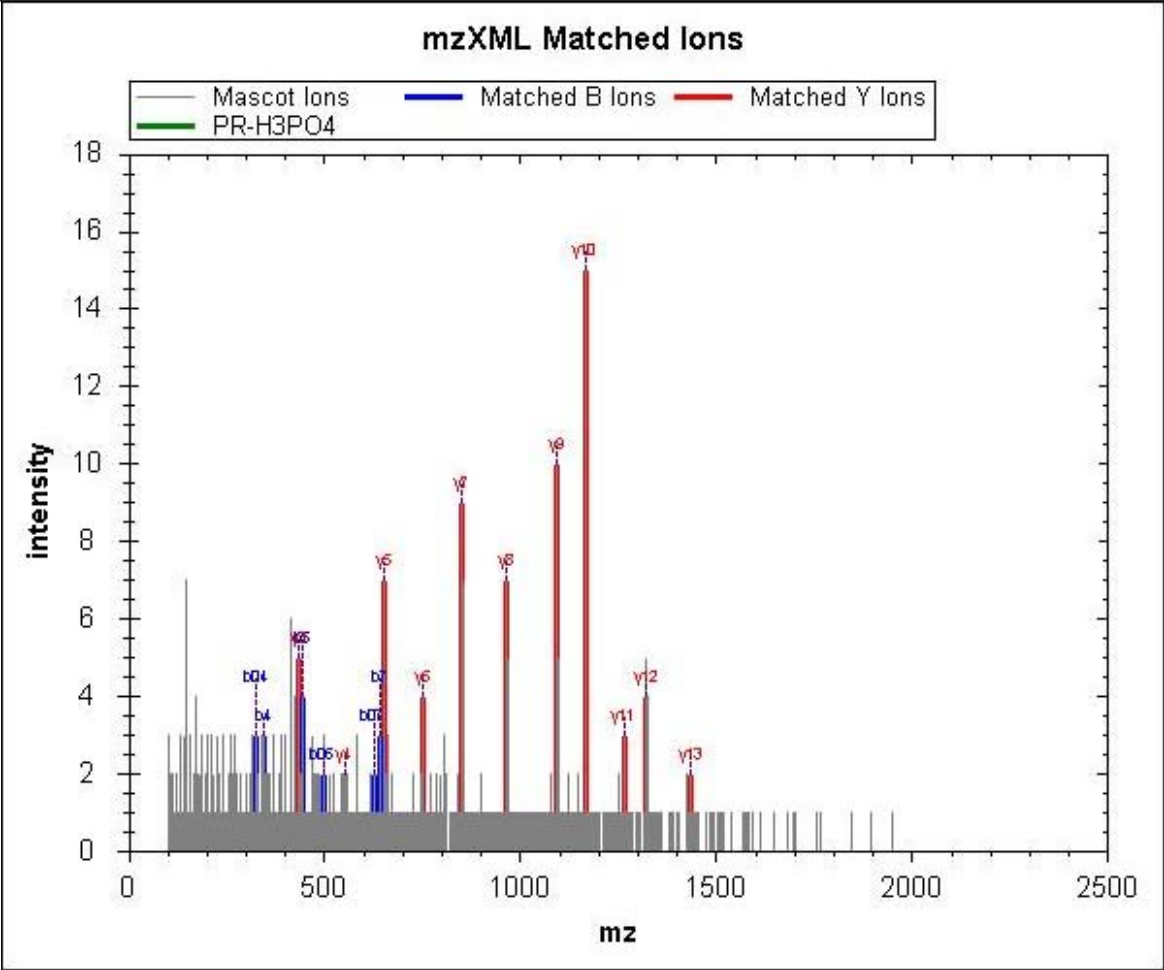

Protein index=717, ACC No:IP100410693

Peptide index=5863 MS/MS spectrum

Sequence: FDQLFDDESDPFEVLK, m/z:972.4539, charge:+ 2, Modification: , Mod Position:

Score: 87.62, Raw data:WET\_B3\_090616\_03.mzxml, MS/MS Elution time: 79.08617, Scan number:4385, Mass delta:0.016, Rank:1

| No | b      | b++   | b* | b*++ | b0 | b0++ | Seq | y | y++ | y* | y*++ | y0 | y0++ | RevNo |
|----|--------|-------|----|------|----|------|-----|---|-----|----|------|----|------|-------|
| 1  | 148.08 | 74.54 |    |      |    |      | F   |   |     |    |      |    |      | 16    |

|    |         |        |         |        |         |        |   |         |        |         |        |         |        |    |
|----|---------|--------|---------|--------|---------|--------|---|---------|--------|---------|--------|---------|--------|----|
| 2  | 263.1   | 132.05 |         |        | 245.09  | 123.05 | D | 1796.82 | 898.92 | 1779.8  | 890.4  | 1778.81 | 889.91 | 15 |
| 3  | 391.16  | 196.08 | 374.13  | 187.57 | 373.15  | 187.08 | Q | 1681.8  | 841.4  | 1664.77 | 832.89 | 1663.79 | 832.4  | 14 |
| 4  | 504.25  | 252.63 | 487.22  | 244.11 | 486.23  | 243.62 | L | 1553.74 | 777.37 | 1536.71 | 768.86 | 1535.73 | 768.37 | 13 |
| 5  | 651.31  | 326.16 | 634.29  | 317.65 | 633.3   | 317.16 | F | 1440.65 | 720.83 | 1423.63 | 712.32 | 1422.64 | 711.82 | 12 |
| 6  | 766.34  | 383.67 | 749.31  | 375.16 | 748.33  | 374.67 | D | 1293.58 | 647.3  | 1276.56 | 638.78 | 1275.57 | 638.29 | 11 |
| 7  | 881.37  | 441.19 | 864.34  | 432.67 | 863.36  | 432.18 | D | 1178.56 | 589.78 | 1161.53 | 581.27 | 1160.55 | 580.78 | 10 |
| 8  | 1010.41 | 505.71 | 993.38  | 497.2  | 992.4   | 496.7  | E | 1063.53 | 532.27 | 1046.5  | 523.76 | 1045.52 | 523.26 | 9  |
| 9  | 1097.44 | 549.22 | 1080.42 | 540.71 | 1079.43 | 540.22 | S | 934.49  | 467.75 | 917.46  | 459.23 | 916.48  | 458.74 | 8  |
| 10 | 1212.47 | 606.74 | 1195.44 | 598.22 | 1194.46 | 597.73 | D | 847.46  | 424.23 | 830.43  | 415.72 | 829.45  | 415.23 | 7  |
| 11 | 1309.52 | 655.26 | 1292.5  | 646.75 | 1291.51 | 646.26 | P | 732.43  | 366.72 | 715.4   | 358.2  | 714.42  | 357.71 | 6  |
| 12 | 1456.59 | 728.8  | 1439.56 | 720.29 | 1438.58 | 719.79 | F | 635.38  | 318.19 | 618.35  | 309.68 | 617.37  | 309.19 | 5  |
| 13 | 1585.63 | 793.32 | 1568.61 | 784.81 | 1567.62 | 784.31 | E | 488.31  | 244.66 | 471.28  | 236.14 | 470.3   | 235.65 | 4  |
| 14 | 1684.7  | 842.85 | 1667.67 | 834.34 | 1666.69 | 833.85 | V | 359.27  | 180.14 | 342.24  | 171.62 |         |        | 3  |
| 15 | 1797.79 | 899.4  | 1780.76 | 890.88 | 1779.77 | 890.39 | L | 260.2   | 130.6  | 243.17  | 122.09 |         |        | 2  |
| 16 |         |        |         |        |         |        | K | 147.11  | 74.06  | 130.09  | 65.55  |         |        | 1  |

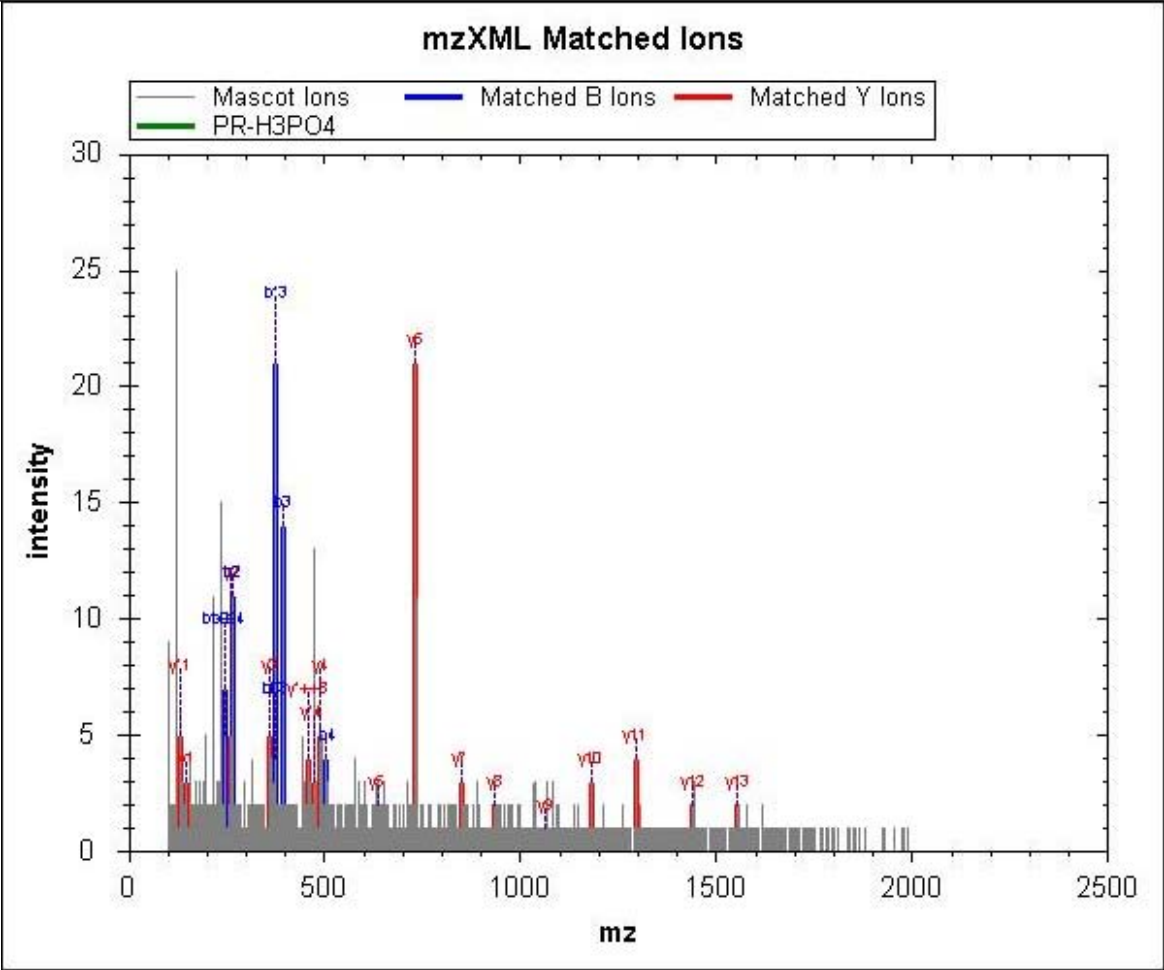

Protein index=718, ACC No:IPI00418830

Peptide index=6856 MS/MS spectrum

Sequence: LGEGALVNDVLQELIR, m/z:869.9872, charge:+ 2, Modification: , Mod Position:

Score: 44.79, Raw data:WET\_A3\_090615\_03.mzxml, MS/MS Elution time: 98.17966, Scan number:5507,

Mass delta:-0.0026, Rank:1

| No | b       | b++    | b*      | b*++   | b0      | b0++   | Seq | y       | y++    | y*      | y*++   | y0      | y0++   | RevNo |
|----|---------|--------|---------|--------|---------|--------|-----|---------|--------|---------|--------|---------|--------|-------|
| 1  | 114.09  | 57.55  |         |        |         |        | L   |         |        |         |        |         |        | 16    |
| 2  | 171.11  | 86.06  |         |        |         |        | G   | 1625.89 | 813.45 | 1608.86 | 804.93 | 1607.88 | 804.44 | 15    |
| 3  | 300.16  | 150.58 |         |        | 282.14  | 141.58 | E   | 1568.86 | 784.94 | 1551.84 | 776.42 | 1550.85 | 775.93 | 14    |
| 4  | 357.18  | 179.09 |         |        | 339.17  | 170.09 | G   | 1439.82 | 720.41 | 1422.8  | 711.9  | 1421.81 | 711.41 | 13    |
| 5  | 428.21  | 214.61 |         |        | 410.2   | 205.61 | A   | 1382.8  | 691.9  | 1365.77 | 683.39 | 1364.79 | 682.9  | 12    |
| 6  | 541.3   | 271.15 |         |        | 523.29  | 262.15 | L   | 1311.76 | 656.39 | 1294.74 | 647.87 | 1293.75 | 647.38 | 11    |
| 7  | 640.37  | 320.69 |         |        | 622.36  | 311.68 | V   | 1198.68 | 599.84 | 1181.65 | 591.33 | 1180.67 | 590.84 | 10    |
| 8  | 754.41  | 377.71 | 737.38  | 369.2  | 736.4   | 368.7  | N   | 1099.61 | 550.31 | 1082.58 | 541.8  | 1081.6  | 541.3  | 9     |
| 9  | 869.44  | 435.22 | 852.41  | 426.71 | 851.43  | 426.22 | D   | 985.57  | 493.29 | 968.54  | 484.77 | 967.56  | 484.28 | 8     |
| 10 | 968.5   | 484.76 | 951.48  | 476.24 | 950.49  | 475.75 | V   | 870.54  | 435.77 | 853.51  | 427.26 | 852.53  | 426.77 | 7     |
| 11 | 1081.59 | 541.3  | 1064.56 | 532.78 | 1063.58 | 532.29 | L   | 771.47  | 386.24 | 754.45  | 377.73 | 753.46  | 377.23 | 6     |
| 12 | 1209.65 | 605.33 | 1192.62 | 596.81 | 1191.64 | 596.32 | Q   | 658.39  | 329.7  | 641.36  | 321.18 | 640.38  | 320.69 | 5     |
| 13 | 1338.69 | 669.85 | 1321.66 | 661.34 | 1320.68 | 660.84 | E   | 530.33  | 265.67 | 513.3   | 257.16 | 512.32  | 256.66 | 4     |
| 14 | 1451.77 | 726.39 | 1434.75 | 717.88 | 1433.76 | 717.39 | L   | 401.29  | 201.15 | 384.26  | 192.63 |         |        | 3     |
| 15 | 1564.86 | 782.93 | 1547.83 | 774.42 | 1546.85 | 773.93 | I   | 288.2   | 144.61 | 271.18  | 136.09 |         |        | 2     |
| 16 |         |        |         |        |         |        | R   | 175.12  | 88.06  | 158.09  | 79.55  |         |        | 1     |

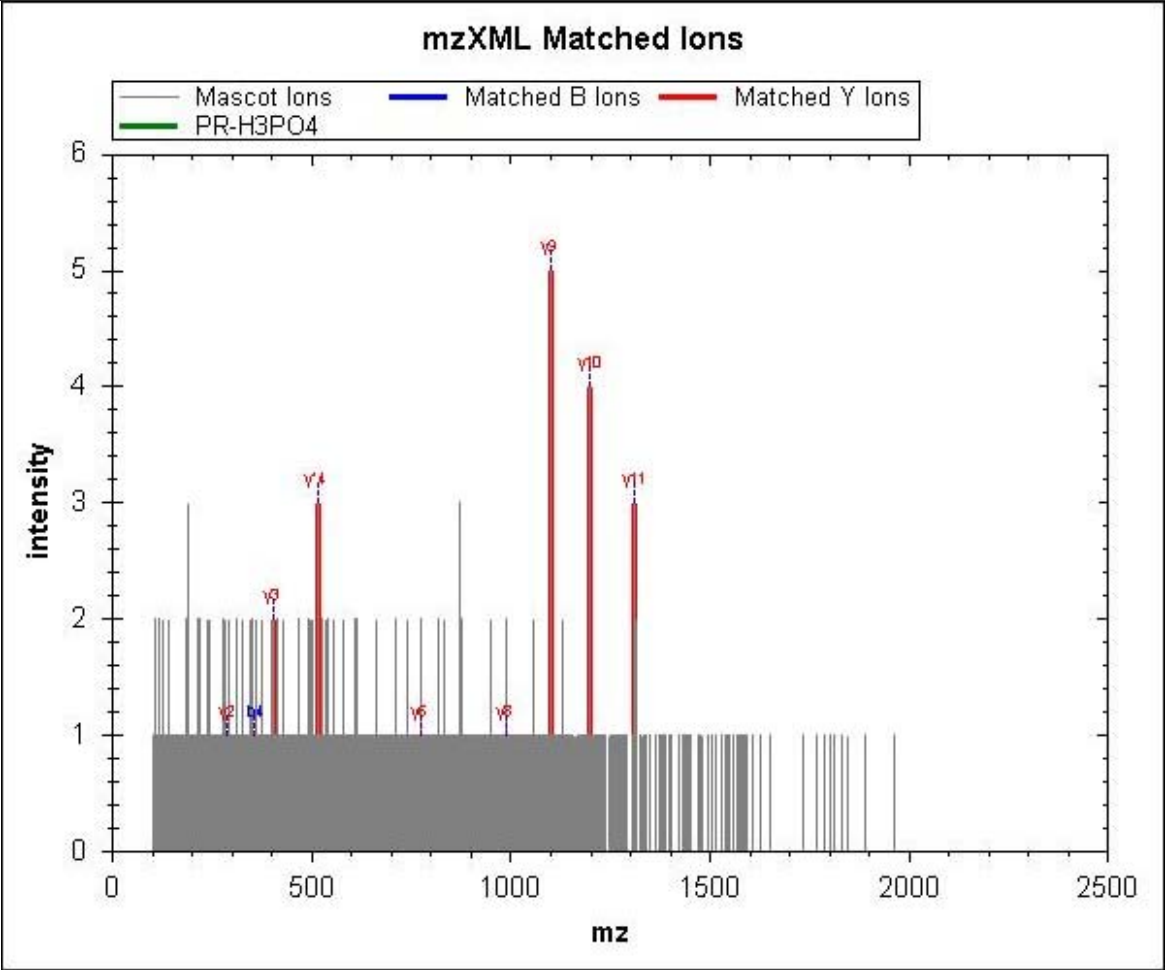

Protein index=722, ACC No:IPI00172656

Peptide index=6758 MS/MS spectrum

Sequence: VTDPVGDIVSFMHSFEELK, m/z:1018.997, charge: + 2, Modification: , Mod Position:

Score: 56, Raw data:WET\_A3\_090615\_03.mzxml, MS/MS Elution time: 95.64883, Scan number:5358, Mass delta:0.0237, Rank:1

| No | b       | b++    | b0      | b0++   | Seq | y       | y++    | y*      | y*++   | y0      | y0++   | RevNo |
|----|---------|--------|---------|--------|-----|---------|--------|---------|--------|---------|--------|-------|
| 1  | 100.08  | 50.54  |         |        | V   |         |        |         |        |         |        | 18    |
| 2  | 201.12  | 101.07 | 183.11  | 92.06  | T   | 1937.89 | 969.45 | 1920.87 | 960.94 | 1919.88 | 960.45 | 17    |
| 3  | 316.15  | 158.58 | 298.14  | 149.57 | D   | 1836.85 | 918.93 | 1819.82 | 910.41 | 1818.84 | 909.92 | 16    |
| 4  | 413.2   | 207.11 | 395.19  | 198.1  | P   | 1721.82 | 861.41 | 1704.79 | 852.9  | 1703.81 | 852.41 | 15    |
| 5  | 512.27  | 256.64 | 494.26  | 247.63 | V   | 1624.77 | 812.89 | 1607.74 | 804.37 | 1606.76 | 803.88 | 14    |
| 6  | 569.29  | 285.15 | 551.28  | 276.14 | G   | 1525.7  | 763.35 | 1508.67 | 754.84 | 1507.69 | 754.35 | 13    |
| 7  | 684.32  | 342.66 | 666.31  | 333.66 | D   | 1468.68 | 734.84 | 1451.65 | 726.33 | 1450.67 | 725.84 | 12    |
| 8  | 797.4   | 399.21 | 779.39  | 390.2  | I   | 1353.65 | 677.33 | 1336.62 | 668.82 | 1335.64 | 668.32 | 11    |
| 9  | 896.47  | 448.74 | 878.46  | 439.73 | V   | 1240.57 | 620.79 | 1223.54 | 612.27 | 1222.56 | 611.78 | 10    |
| 10 | 983.5   | 492.26 | 965.49  | 483.25 | S   | 1141.5  | 571.25 | 1124.47 | 562.74 | 1123.49 | 562.25 | 9     |
| 11 | 1130.57 | 565.79 | 1112.56 | 556.78 | F   | 1054.47 | 527.74 | 1037.44 | 519.22 | 1036.46 | 518.73 | 8     |
| 12 | 1261.61 | 631.31 | 1243.6  | 622.31 | M   | 907.4   | 454.2  | 890.37  | 445.69 | 889.39  | 445.2  | 7     |
| 13 | 1398.67 | 699.84 | 1380.66 | 690.83 | H   | 776.36  | 388.68 | 759.33  | 380.17 | 758.35  | 379.68 | 6     |
| 14 | 1485.7  | 743.36 | 1467.69 | 734.35 | S   | 639.3   | 320.15 | 622.27  | 311.64 | 621.29  | 311.15 | 5     |
| 15 | 1632.77 | 816.89 | 1614.76 | 807.88 | F   | 552.27  | 276.64 | 535.24  | 268.12 | 534.26  | 267.63 | 4     |
| 16 | 1761.82 | 881.41 | 1743.8  | 872.41 | E   | 405.2   | 203.1  | 388.17  | 194.59 | 387.19  | 194.1  | 3     |
| 17 | 1890.86 | 945.93 | 1872.85 | 936.93 | E   | 276.16  | 138.58 | 259.13  | 130.07 | 258.14  | 129.58 | 2     |
| 18 |         |        |         |        | K   | 147.11  | 74.06  | 130.09  | 65.55  |         |        | 1     |

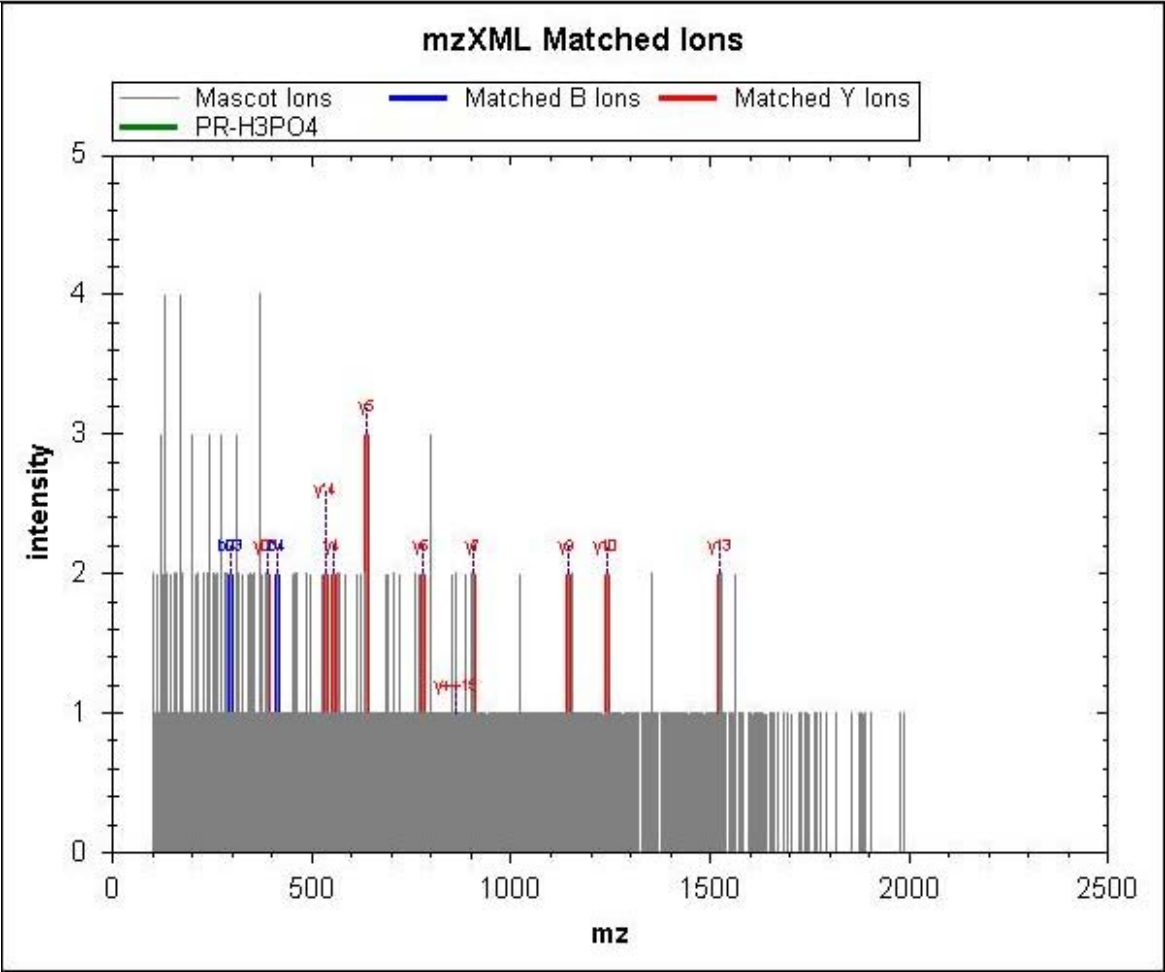

Protein index=723, ACC No:IPI00003944

Peptide index=1362 MS/MS spectrum

Sequence: LSDIGEGIR, m/z:480.2587, charge:+ 2, Modification: , Mod Position:

Score: 40.39, Raw data:WET\_A3\_090615\_03.mzxml, MS/MS Elution time: 32.34283, Scan number:1651, Mass delta:-0.0054, Rank:1

| No | b      | b++    | b0     | b0++   | Seq | y      | y++    | y*     | y*++   | y0     | y0++   | RevNo |
|----|--------|--------|--------|--------|-----|--------|--------|--------|--------|--------|--------|-------|
| 1  | 114.09 | 57.55  |        |        | L   |        |        |        |        |        |        | 9     |
| 2  | 201.12 | 101.07 | 183.11 | 92.06  | S   | 846.43 | 423.72 | 829.4  | 415.21 | 828.42 | 414.71 | 8     |
| 3  | 316.15 | 158.58 | 298.14 | 149.57 | D   | 759.4  | 380.2  | 742.37 | 371.69 | 741.39 | 371.2  | 7     |
| 4  | 429.23 | 215.12 | 411.22 | 206.12 | I   | 644.37 | 322.69 | 627.35 | 314.18 | 626.36 | 313.68 | 6     |
| 5  | 486.26 | 243.63 | 468.25 | 234.63 | G   | 531.29 | 266.15 | 514.26 | 257.63 | 513.28 | 257.14 | 5     |
| 6  | 615.3  | 308.15 | 597.29 | 299.15 | E   | 474.27 | 237.64 | 457.24 | 229.12 | 456.26 | 228.63 | 4     |
| 7  | 672.32 | 336.66 | 654.31 | 327.66 | G   | 345.22 | 173.12 | 328.2  | 164.6  |        |        | 3     |
| 8  | 785.4  | 393.21 | 767.39 | 384.2  | I   | 288.2  | 144.61 | 271.18 | 136.09 |        |        | 2     |
| 9  |        |        |        |        | R   | 175.12 | 88.06  | 158.09 | 79.55  |        |        | 1     |

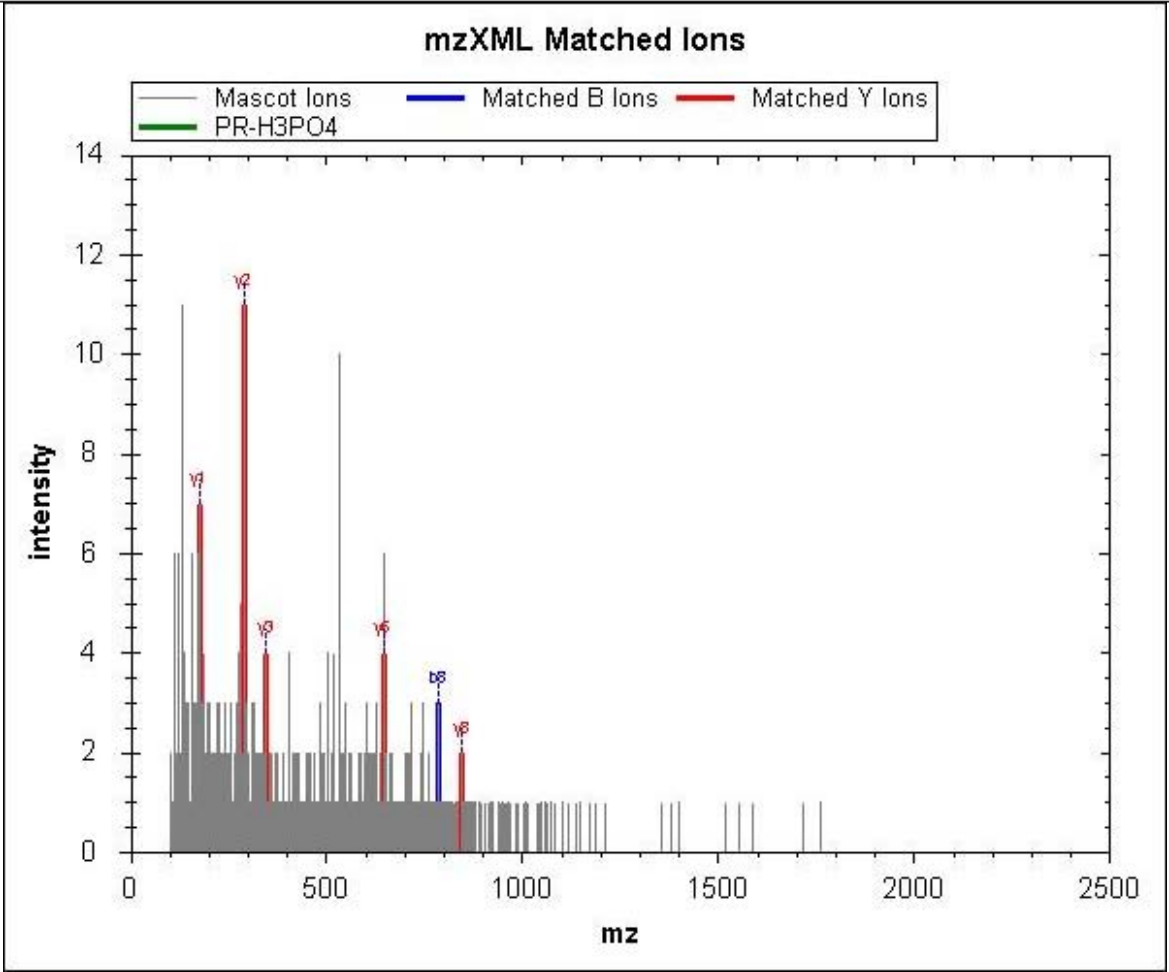

Protein index=724, ACC No:IPI00297982

Peptide index=1770 MS/MS spectrum

Sequence: VGQEIEVRPGIVSK, m/z:504.2867, charge:+ 3, Modification: , Mod Position:

Score: 44.14, Raw data:WET\_B3\_090616\_02.mzxml, MS/MS Elution time: 37.47617, Scan number:1953, Mass delta:-0.0056, Rank:1

| No | b       | b++    | b*      | b*++   | b0      | b0++   | Seq | y       | y++    | y*      | y*++   | y0      | y0++   | RevNo |
|----|---------|--------|---------|--------|---------|--------|-----|---------|--------|---------|--------|---------|--------|-------|
| 1  | 100.08  | 50.54  |         |        |         |        | V   |         |        |         |        |         |        | 14    |
| 2  | 157.1   | 79.05  |         |        |         |        | G   | 1411.79 | 706.4  | 1394.76 | 697.89 | 1393.78 | 697.39 | 13    |
| 3  | 285.16  | 143.08 | 268.13  | 134.57 |         |        | Q   | 1354.77 | 677.89 | 1337.74 | 669.37 | 1336.76 | 668.88 | 12    |
| 4  | 414.2   | 207.6  | 397.17  | 199.09 | 396.19  | 198.6  | E   | 1226.71 | 613.86 | 1209.68 | 605.35 | 1208.7  | 604.85 | 11    |
| 5  | 527.28  | 264.14 | 510.26  | 255.63 | 509.27  | 255.14 | I   | 1097.67 | 549.34 | 1080.64 | 540.82 | 1079.66 | 540.33 | 10    |
| 6  | 656.32  | 328.67 | 639.3   | 320.15 | 638.31  | 319.66 | E   | 984.58  | 492.8  | 967.56  | 484.28 | 966.57  | 483.79 | 9     |
| 7  | 755.39  | 378.2  | 738.37  | 369.69 | 737.38  | 369.2  | V   | 855.54  | 428.27 | 838.51  | 419.76 | 837.53  | 419.27 | 8     |
| 8  | 911.49  | 456.25 | 894.47  | 447.74 | 893.48  | 447.25 | R   | 756.47  | 378.74 | 739.45  | 370.23 | 738.46  | 369.73 | 7     |
| 9  | 1008.55 | 504.78 | 991.52  | 496.26 | 990.54  | 495.77 | P   | 600.37  | 300.69 | 583.34  | 292.18 | 582.36  | 291.68 | 6     |
| 10 | 1065.57 | 533.29 | 1048.54 | 524.77 | 1047.56 | 524.28 | G   | 503.32  | 252.16 | 486.29  | 243.65 | 485.31  | 243.16 | 5     |
| 11 | 1178.65 | 589.83 | 1161.63 | 581.32 | 1160.64 | 580.82 | I   | 446.3   | 223.65 | 429.27  | 215.14 | 428.29  | 214.65 | 4     |
| 12 | 1277.72 | 639.36 | 1260.69 | 630.85 | 1259.71 | 630.36 | V   | 333.21  | 167.11 | 316.19  | 158.6  | 315.2   | 158.1  | 3     |

|    |         |        |         |        |         |        |   |        |        |        |        |        |        |   |
|----|---------|--------|---------|--------|---------|--------|---|--------|--------|--------|--------|--------|--------|---|
| 13 | 1364.75 | 682.88 | 1347.73 | 674.37 | 1346.74 | 673.87 | S | 234.14 | 117.58 | 217.12 | 109.06 | 216.13 | 108.57 | 2 |
| 14 |         |        |         |        |         |        | K | 147.11 | 74.06  | 130.09 | 65.55  |        |        | 1 |

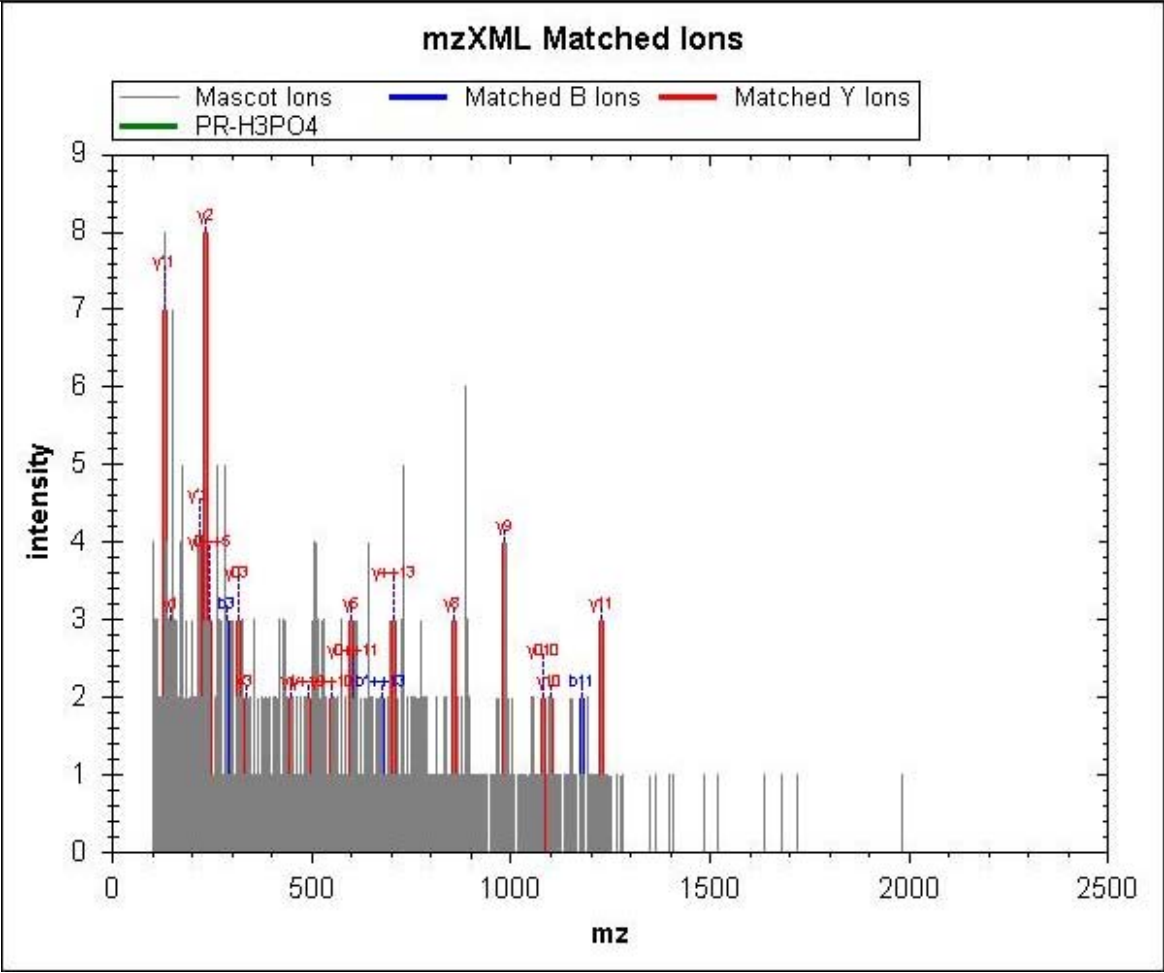

Protein index=725, ACC No:IPI00008274

Peptide index=6990 MS/MS spectrum

Sequence: AGAAPYVQAFDSLLAGPVAEYLK, m/z:1176.12, charge:+ 2, Modification: , Mod Position:

Score: 52.46, Raw data:WET\_B3\_090616\_01.mzxml, MS/MS Elution time: 103.0107, Scan number:5753, Mass delta:0.0252, Rank:1

| No | b      | b++    | b*     | b*++   | b0 | b0++ | Seq | y       | y++     | y*      | y*++    | y0      | y0++    | RevNo |
|----|--------|--------|--------|--------|----|------|-----|---------|---------|---------|---------|---------|---------|-------|
| 1  | 72.04  | 36.53  |        |        |    |      | A   |         |         |         |         |         |         | 23    |
| 2  | 129.07 | 65.04  |        |        |    |      | G   | 2280.19 | 1140.6  | 2263.16 | 1132.09 | 2262.18 | 1131.59 | 22    |
| 3  | 200.1  | 100.56 |        |        |    |      | A   | 2223.17 | 1112.09 | 2206.14 | 1103.58 | 2205.16 | 1103.08 | 21    |
| 4  | 271.14 | 136.07 |        |        |    |      | A   | 2152.13 | 1076.57 | 2135.11 | 1068.06 | 2134.12 | 1067.56 | 20    |
| 5  | 368.19 | 184.6  |        |        |    |      | P   | 2081.1  | 1041.05 | 2064.07 | 1032.54 | 2063.08 | 1032.05 | 19    |
| 6  | 531.26 | 266.13 |        |        |    |      | Y   | 1984.04 | 992.52  | 1967.02 | 984.01  | 1966.03 | 983.52  | 18    |
| 7  | 630.32 | 315.67 |        |        |    |      | V   | 1820.98 | 910.99  | 1803.95 | 902.48  | 1802.97 | 901.99  | 17    |
| 8  | 758.38 | 379.7  | 741.36 | 371.18 |    |      | Q   | 1721.91 | 861.46  | 1704.88 | 852.95  | 1703.9  | 852.45  | 16    |
| 9  | 829.42 | 415.21 | 812.39 | 406.7  |    |      | A   | 1593.85 | 797.43  | 1576.83 | 788.92  | 1575.84 | 788.42  | 15    |
| 10 | 976.49 | 488.75 | 959.46 | 480.23 |    |      | F   | 1522.82 | 761.91  | 1505.79 | 753.4   | 1504.8  | 752.91  | 14    |



| No | b       | b++    | b*      | b*++   | b0      | b0++   | Seq | y       | y++    | y*      | y*++   | y0      | y0++   | RevNo |
|----|---------|--------|---------|--------|---------|--------|-----|---------|--------|---------|--------|---------|--------|-------|
| 1  | 114.09  | 57.55  |         |        |         |        | L   |         |        |         |        |         |        | 12    |
| 2  | 229.12  | 115.06 |         |        | 211.11  | 106.06 | D   | 1255.7  | 628.35 | 1238.67 | 619.84 | 1237.69 | 619.35 | 11    |
| 3  | 343.16  | 172.08 | 326.13  | 163.57 | 325.15  | 163.08 | N   | 1140.67 | 570.84 | 1123.65 | 562.33 | 1122.66 | 561.84 | 10    |
| 4  | 456.25  | 228.63 | 439.22  | 220.11 | 438.23  | 219.62 | L   | 1026.63 | 513.82 | 1009.6  | 505.31 | 1008.62 | 504.81 | 9     |
| 5  | 555.31  | 278.16 | 538.29  | 269.65 | 537.3   | 269.16 | V   | 913.55  | 457.28 | 896.52  | 448.76 | 895.54  | 448.27 | 8     |
| 6  | 626.35  | 313.68 | 609.32  | 305.17 | 608.34  | 304.67 | A   | 814.48  | 407.74 | 797.45  | 399.23 | 796.47  | 398.74 | 7     |
| 7  | 739.43  | 370.22 | 722.41  | 361.71 | 721.42  | 361.22 | I   | 743.44  | 372.22 | 726.41  | 363.71 | 725.43  | 363.22 | 6     |
| 8  | 852.52  | 426.76 | 835.49  | 418.25 | 834.51  | 417.76 | L   | 630.36  | 315.68 | 613.33  | 307.17 | 612.35  | 306.68 | 5     |
| 9  | 967.55  | 484.28 | 950.52  | 475.76 | 949.54  | 475.27 | D   | 517.27  | 259.14 | 500.25  | 250.63 | 499.26  | 250.13 | 4     |
| 10 | 1080.63 | 540.82 | 1063.6  | 532.31 | 1062.62 | 531.81 | I   | 402.25  | 201.63 | 385.22  | 193.11 |         |        | 3     |
| 11 | 1194.67 | 597.84 | 1177.65 | 589.33 | 1176.66 | 588.83 | N   | 289.16  | 145.08 | 272.14  | 136.57 |         |        | 2     |
| 12 |         |        |         |        |         |        | R   | 175.12  | 88.06  | 158.09  | 79.55  |         |        | 1     |

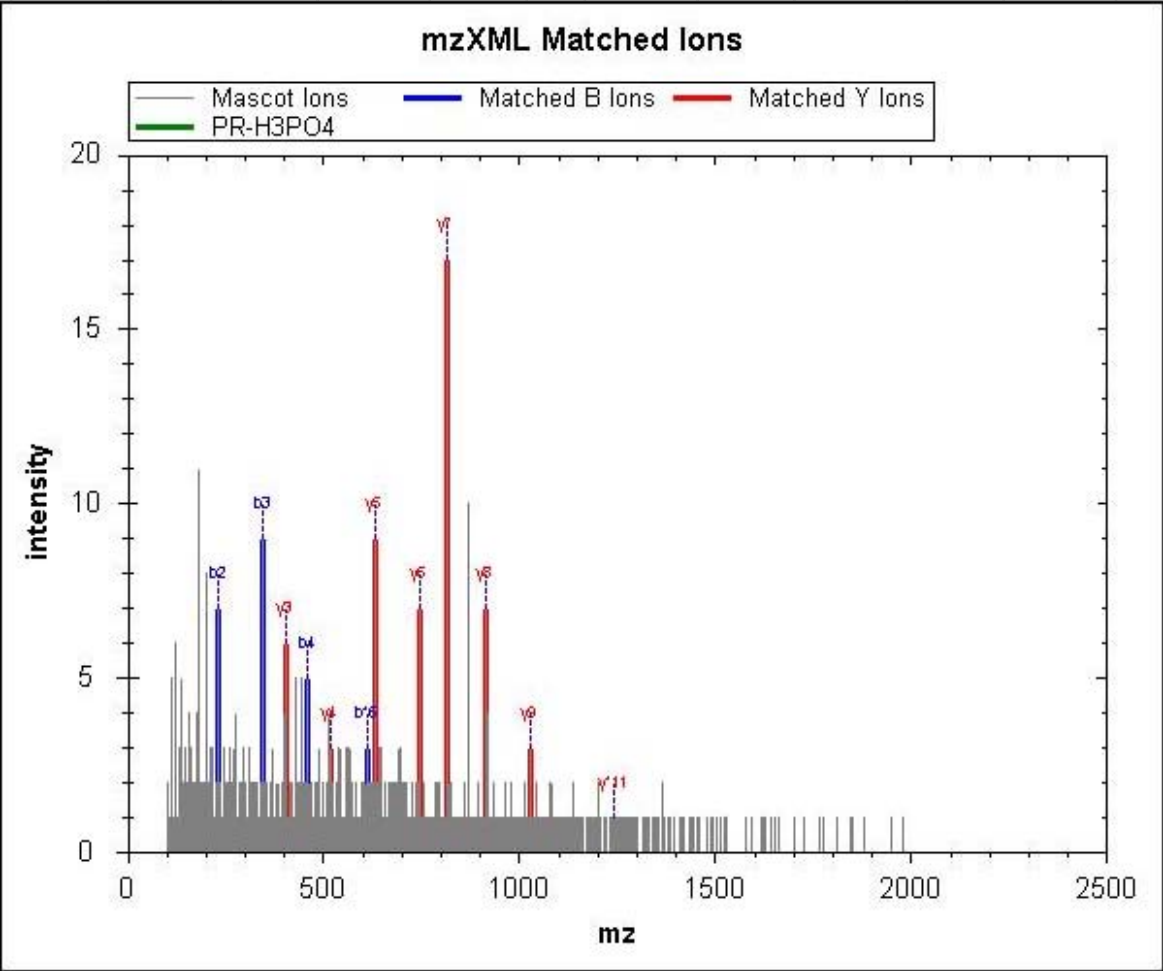

Protein index=727, ACC No:IP100181617

Peptide index=6164 MS/MS spectrum

Sequence: LASLFSSLEPQIQPVYVPVK, m/z:1156.649, charge:+ 2, Modification: , Mod Position:

Score: 43.82, Raw data:WET\_A3\_090615\_03.mzxml, MS/MS Elution time: 83.3015, Scan number:4635, Mass delta:0.0005, Rank:1

| No | b       | b++     | b*      | b*++    | b0      | b0++    | Seq | y       | y++     | y*      | y*++    | y0      | y0++    | RevNo |
|----|---------|---------|---------|---------|---------|---------|-----|---------|---------|---------|---------|---------|---------|-------|
| 1  | 114.09  | 57.55   |         |         |         |         | L   |         |         |         |         |         |         | 21    |
| 2  | 185.13  | 93.07   |         |         |         |         | A   | 2199.21 | 1100.11 | 2182.18 | 1091.59 | 2181.2  | 1091.1  | 20    |
| 3  | 272.16  | 136.58  |         |         | 254.15  | 127.58  | S   | 2128.17 | 1064.59 | 2111.14 | 1056.07 | 2110.16 | 1055.58 | 19    |
| 4  | 385.24  | 193.13  |         |         | 367.23  | 184.12  | L   | 2041.14 | 1021.07 | 2024.11 | 1012.56 | 2023.13 | 1012.07 | 18    |
| 5  | 532.31  | 266.66  |         |         | 514.3   | 257.65  | F   | 1928.05 | 964.53  | 1911.03 | 956.02  | 1910.04 | 955.52  | 17    |
| 6  | 619.34  | 310.18  |         |         | 601.33  | 301.17  | S   | 1780.98 | 891     | 1763.96 | 882.48  | 1762.97 | 881.99  | 16    |
| 7  | 706.38  | 353.69  |         |         | 688.37  | 344.69  | S   | 1693.95 | 847.48  | 1676.93 | 838.97  | 1675.94 | 838.47  | 15    |
| 8  | 819.46  | 410.23  |         |         | 801.45  | 401.23  | L   | 1606.92 | 803.96  | 1589.89 | 795.45  | 1588.91 | 794.96  | 14    |
| 9  | 948.5   | 474.76  |         |         | 930.49  | 465.75  | E   | 1493.84 | 747.42  | 1476.81 | 738.91  | 1475.83 | 738.42  | 13    |
| 10 | 1045.56 | 523.28  |         |         | 1027.55 | 514.28  | P   | 1364.79 | 682.9   | 1347.77 | 674.39  |         |         | 12    |
| 11 | 1173.62 | 587.31  | 1156.59 | 578.8   | 1155.6  | 578.31  | Q   | 1267.74 | 634.37  | 1250.71 | 625.86  |         |         | 11    |
| 12 | 1286.7  | 643.85  | 1269.67 | 635.34  | 1268.69 | 634.85  | I   | 1139.68 | 570.34  | 1122.66 | 561.83  |         |         | 10    |
| 13 | 1414.76 | 707.88  | 1397.73 | 699.37  | 1396.75 | 698.88  | Q   | 1026.6  | 513.8   | 1009.57 | 505.29  |         |         | 9     |
| 14 | 1511.81 | 756.41  | 1494.78 | 747.9   | 1493.8  | 747.4   | P   | 898.54  | 449.77  | 881.51  | 441.26  |         |         | 8     |
| 15 | 1610.88 | 805.94  | 1593.85 | 797.43  | 1592.87 | 796.94  | V   | 801.49  | 401.25  | 784.46  | 392.73  |         |         | 7     |
| 16 | 1773.94 | 887.47  | 1756.92 | 878.96  | 1755.93 | 878.47  | Y   | 702.42  | 351.71  | 685.39  | 343.2   |         |         | 6     |
| 17 | 1873.01 | 937.01  | 1855.98 | 928.5   | 1855    | 928     | V   | 539.36  | 270.18  | 522.33  | 261.67  |         |         | 5     |
| 18 | 1970.06 | 985.54  | 1953.04 | 977.02  | 1952.05 | 976.53  | P   | 440.29  | 220.65  | 423.26  | 212.13  |         |         | 4     |
| 19 | 2069.13 | 1035.07 | 2052.11 | 1026.56 | 2051.12 | 1026.06 | V   | 343.23  | 172.12  | 326.21  | 163.61  |         |         | 3     |
| 20 | 2166.18 | 1083.6  | 2149.16 | 1075.08 | 2148.17 | 1074.59 | P   | 244.17  | 122.59  | 227.14  | 114.07  |         |         | 2     |
| 21 |         |         |         |         |         |         | K   | 147.11  | 74.06   | 130.09  | 65.55   |         |         | 1     |

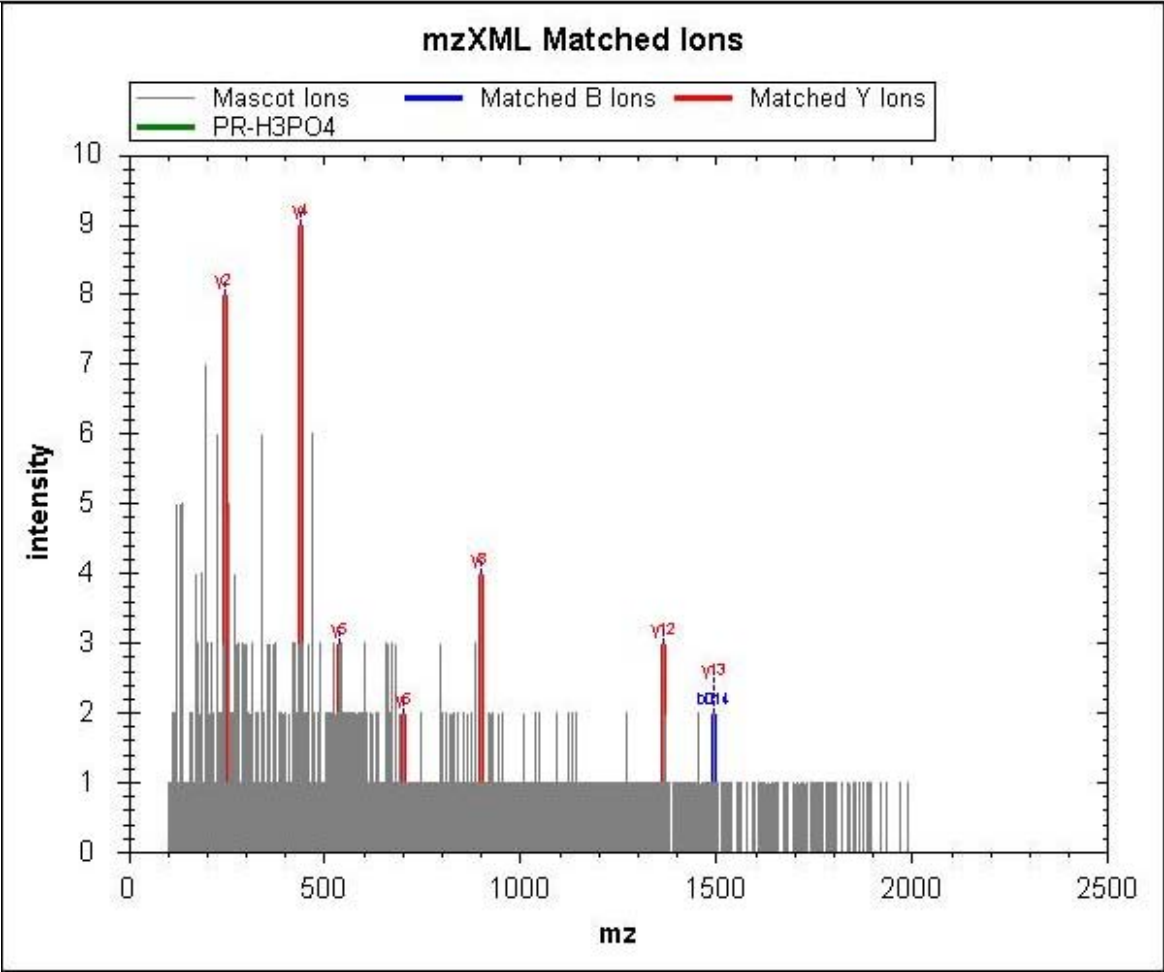

Protein index=729, ACC No:IPI00166036

Peptide index=4414 MS/MS spectrum

Sequence: QINLNNEWTVEKLN, m/z:864.9372, charge:+ 2, Modification: , Mod Position:

Score: 41.47, Raw data:WET\_B4\_090616\_01.mzxml, MS/MS Elution time: 62.10984, Scan number:3399, Mass delta:-0.0647, Rank:1

| No | b       | b++    | b*      | b*++   | b0      | b0++   | Seq | y       | y++    | y*      | y*++   | y0      | y0++   | RevNo |
|----|---------|--------|---------|--------|---------|--------|-----|---------|--------|---------|--------|---------|--------|-------|
| 1  | 129.07  | 65.04  | 112.04  | 56.52  |         |        | Q   |         |        |         |        |         |        | 14    |
| 2  | 242.15  | 121.58 | 225.12  | 113.07 |         |        | I   | 1600.87 | 800.94 | 1583.84 | 792.43 | 1582.86 | 791.93 | 13    |
| 3  | 356.19  | 178.6  | 339.17  | 170.09 |         |        | N   | 1487.79 | 744.4  | 1470.76 | 735.88 | 1469.77 | 735.39 | 12    |
| 4  | 469.28  | 235.14 | 452.25  | 226.63 |         |        | L   | 1373.74 | 687.37 | 1356.72 | 678.86 | 1355.73 | 678.37 | 11    |
| 5  | 583.32  | 292.16 | 566.29  | 283.65 |         |        | N   | 1260.66 | 630.83 | 1243.63 | 622.32 | 1242.65 | 621.83 | 10    |
| 6  | 697.36  | 349.18 | 680.34  | 340.67 |         |        | N   | 1146.62 | 573.81 | 1129.59 | 565.3  | 1128.6  | 564.81 | 9     |
| 7  | 826.41  | 413.71 | 809.38  | 405.19 | 808.39  | 404.7  | E   | 1032.57 | 516.79 | 1015.55 | 508.28 | 1014.56 | 507.78 | 8     |
| 8  | 1012.48 | 506.75 | 995.46  | 498.23 | 994.47  | 497.74 | W   | 903.53  | 452.27 | 886.5   | 443.76 | 885.52  | 443.26 | 7     |
| 9  | 1113.53 | 557.27 | 1096.51 | 548.76 | 1095.52 | 548.26 | T   | 717.45  | 359.23 | 700.42  | 350.72 | 699.44  | 350.22 | 6     |
| 10 | 1212.6  | 606.8  | 1195.57 | 598.29 | 1194.59 | 597.8  | V   | 616.4   | 308.71 | 599.38  | 300.19 | 598.39  | 299.7  | 5     |
| 11 | 1341.64 | 671.33 | 1324.62 | 662.81 | 1323.63 | 662.32 | E   | 517.33  | 259.17 | 500.31  | 250.66 | 499.32  | 250.17 | 4     |
| 12 | 1469.74 | 735.37 | 1452.71 | 726.86 | 1451.73 | 726.37 | K   | 388.29  | 194.65 | 371.27  | 186.14 |         |        | 3     |

|    |         |        |        |       |         |        |   |        |       |        |        |  |  |   |
|----|---------|--------|--------|-------|---------|--------|---|--------|-------|--------|--------|--|--|---|
| 13 | 1582.82 | 791.91 | 1565.8 | 783.4 | 1564.81 | 782.91 | L | 260.2  | 130.6 | 243.17 | 122.09 |  |  | 2 |
| 14 |         |        |        |       |         |        | K | 147.11 | 74.06 | 130.09 | 65.55  |  |  | 1 |

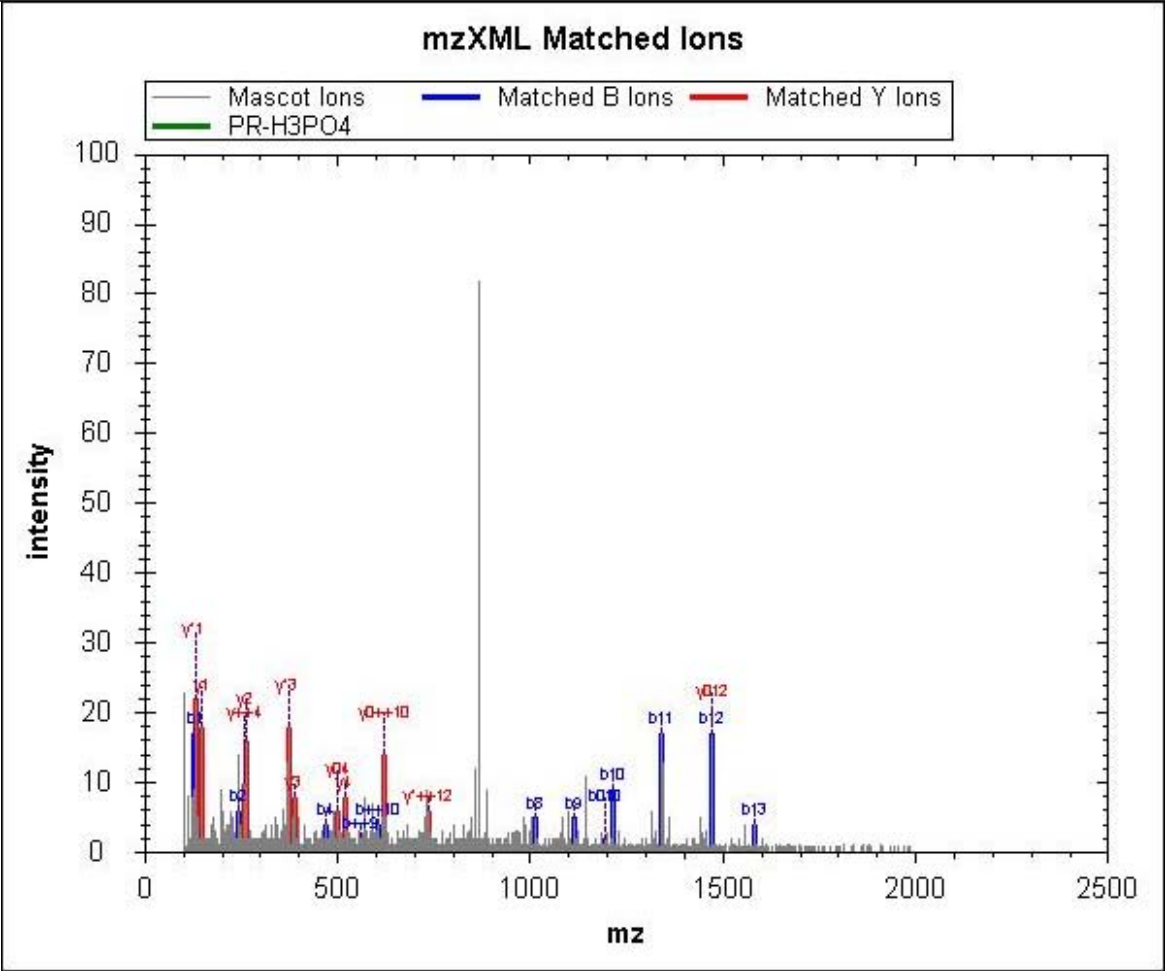

Protein index=760, ACC No:IPI00302176

Peptide index=3539 MS/MS spectrum

Sequence: VDEIFGQLR, m/z:538.7891, charge:+ 2, Modification: , Mod Position:

Score: 48.12, Raw data:WET\_A4\_090615\_03.mzxml, MS/MS Elution time: 53.60433, Scan number:2884, Mass delta:-0.0021, Rank:1

| No | b      | b++    | b*     | b*++   | b0     | b0++   | Seq | y      | y++    | y*     | y*++   | y0     | y0++   | RevNo |
|----|--------|--------|--------|--------|--------|--------|-----|--------|--------|--------|--------|--------|--------|-------|
| 1  | 100.08 | 50.54  |        |        |        |        | V   |        |        |        |        |        |        | 9     |
| 2  | 215.1  | 108.05 |        |        | 197.09 | 99.05  | D   | 977.51 | 489.26 | 960.48 | 480.74 | 959.49 | 480.25 | 8     |
| 3  | 344.15 | 172.58 |        |        | 326.13 | 163.57 | E   | 862.48 | 431.74 | 845.45 | 423.23 | 844.47 | 422.74 | 7     |
| 4  | 457.23 | 229.12 |        |        | 439.22 | 220.11 | I   | 733.44 | 367.22 | 716.41 | 358.71 |        |        | 6     |
| 5  | 604.3  | 302.65 |        |        | 586.29 | 293.65 | F   | 620.35 | 310.68 | 603.32 | 302.17 |        |        | 5     |
| 6  | 661.32 | 331.16 |        |        | 643.31 | 322.16 | G   | 473.28 | 237.15 | 456.26 | 228.63 |        |        | 4     |
| 7  | 789.38 | 395.19 | 772.35 | 386.68 | 771.37 | 386.19 | Q   | 416.26 | 208.63 | 399.24 | 200.12 |        |        | 3     |
| 8  | 902.46 | 451.73 | 885.44 | 443.22 | 884.45 | 442.73 | L   | 288.2  | 144.61 | 271.18 | 136.09 |        |        | 2     |
| 9  |        |        |        |        |        |        | R   | 175.12 | 88.06  | 158.09 | 79.55  |        |        | 1     |

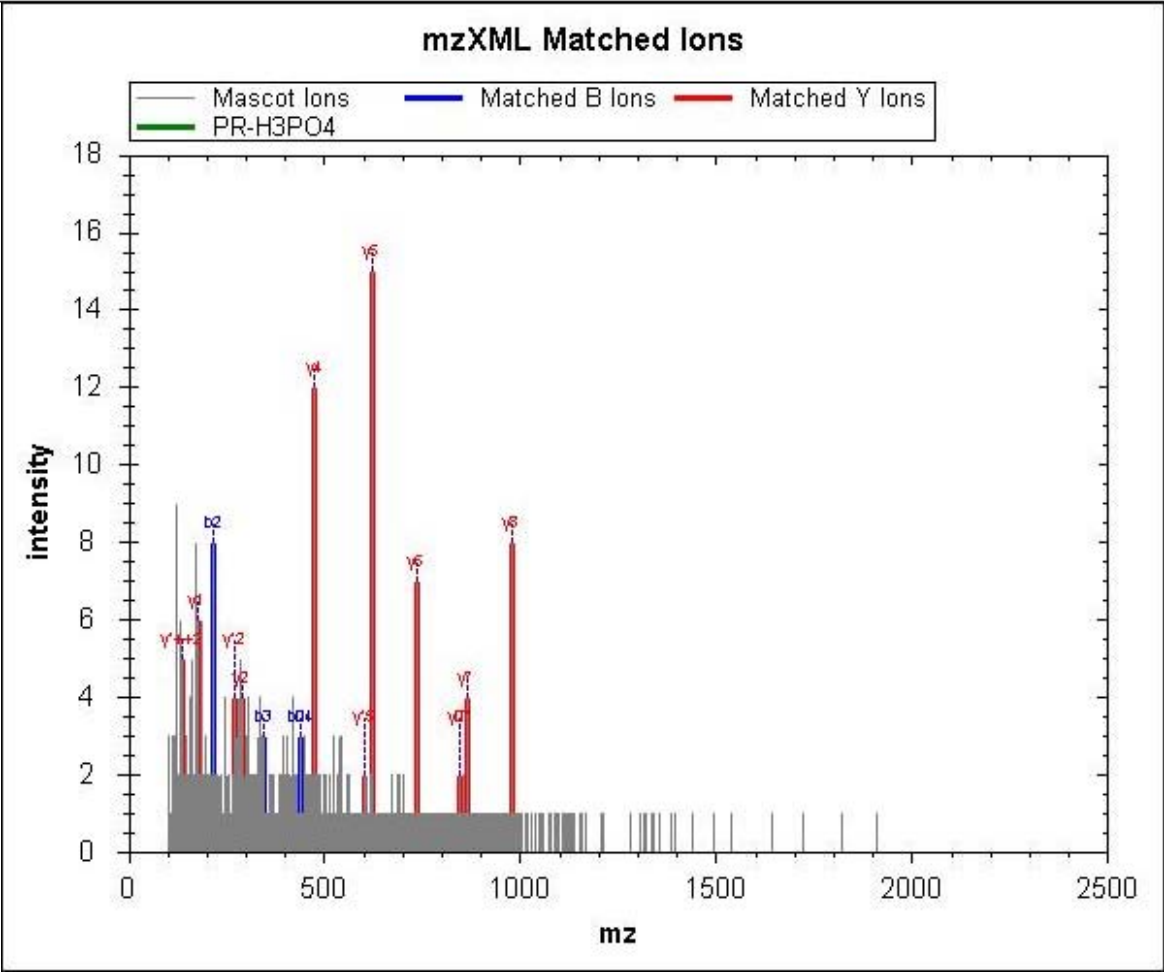

Protein index=780, ACC No:IPI00015952

Peptide index=3412 MS/MS spectrum

Sequence: MLPEIDQNKDR, m/z:679.8405, charge:+ 2, Modification: , Mod Position:

Score: 45.68, Raw data:WET\_B4\_090616\_02.mzxml, MS/MS Elution time: 52.3585, Scan number:2811, Mass delta:0.0058, Rank:1

| No | b       | b++    | b*      | b*++   | b0      | b0++   | Seq | y       | y++    | y*      | y*++   | y0      | y0++   | RevNo |
|----|---------|--------|---------|--------|---------|--------|-----|---------|--------|---------|--------|---------|--------|-------|
| 1  | 132.05  | 66.53  |         |        |         |        | M   |         |        |         |        |         |        | 11    |
| 2  | 245.13  | 123.07 |         |        |         |        | L   | 1227.63 | 614.32 | 1210.61 | 605.81 | 1209.62 | 605.31 | 10    |
| 3  | 342.18  | 171.6  |         |        |         |        | P   | 1114.55 | 557.78 | 1097.52 | 549.26 | 1096.54 | 548.77 | 9     |
| 4  | 471.23  | 236.12 |         |        | 453.22  | 227.11 | E   | 1017.5  | 509.25 | 1000.47 | 500.74 | 999.49  | 500.25 | 8     |
| 5  | 584.31  | 292.66 |         |        | 566.3   | 283.65 | I   | 888.45  | 444.73 | 871.43  | 436.22 | 870.44  | 435.73 | 7     |
| 6  | 699.34  | 350.17 |         |        | 681.33  | 341.17 | D   | 775.37  | 388.19 | 758.34  | 379.67 | 757.36  | 379.18 | 6     |
| 7  | 827.4   | 414.2  | 810.37  | 405.69 | 809.39  | 405.2  | Q   | 660.34  | 330.67 | 643.32  | 322.16 | 642.33  | 321.67 | 5     |
| 8  | 941.44  | 471.22 | 924.41  | 462.71 | 923.43  | 462.22 | N   | 532.28  | 266.65 | 515.26  | 258.13 | 514.27  | 257.64 | 4     |
| 9  | 1069.53 | 535.27 | 1052.51 | 526.76 | 1051.52 | 526.27 | K   | 418.24  | 209.62 | 401.21  | 201.11 | 400.23  | 200.62 | 3     |
| 10 | 1184.56 | 592.78 | 1167.54 | 584.27 | 1166.55 | 583.78 | D   | 290.15  | 145.58 | 273.12  | 137.06 | 272.14  | 136.57 | 2     |
| 11 |         |        |         |        |         |        | R   | 175.12  | 88.06  | 158.09  | 79.55  |         |        | 1     |

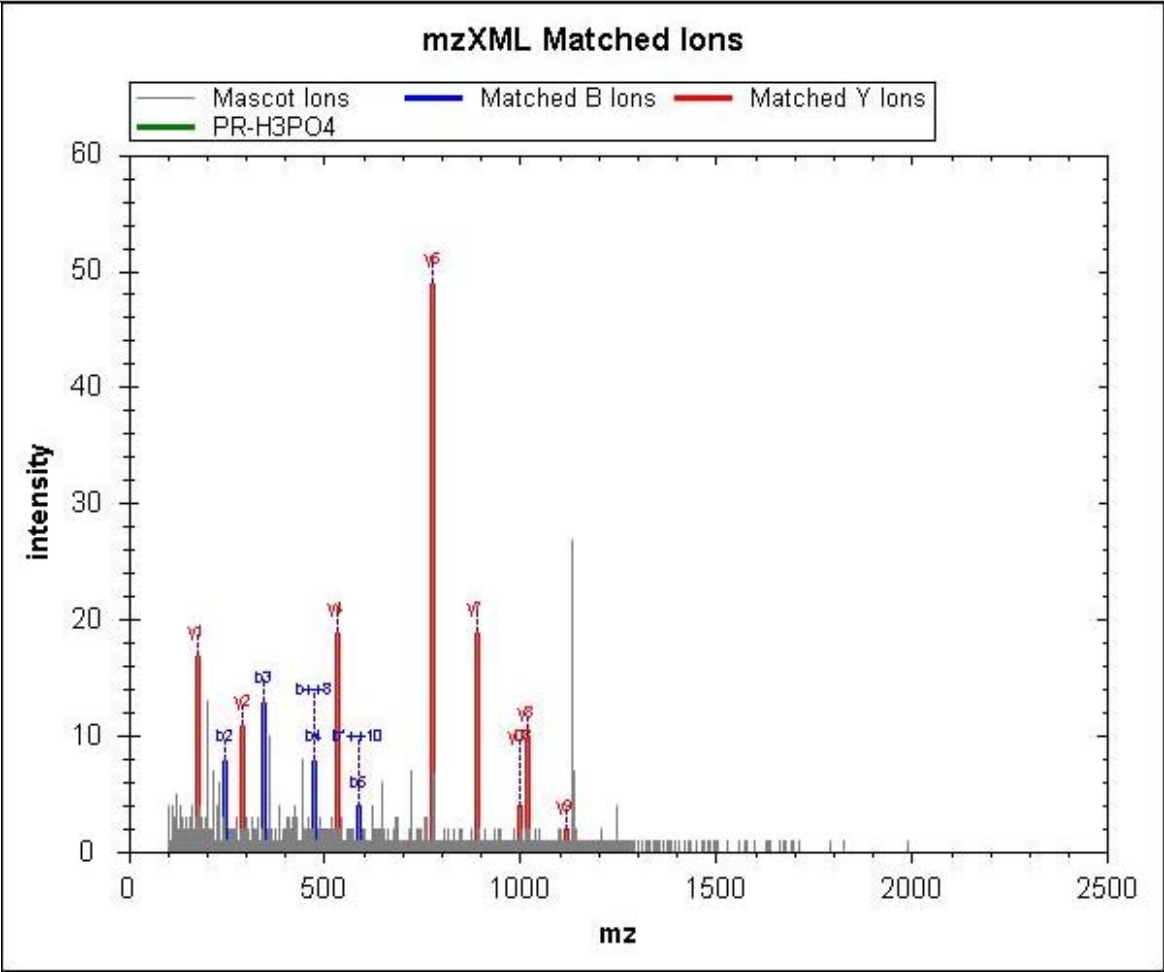

Protein index=784, ACC No:IPI00293564

Peptide index=4913 MS/MS spectrum

Sequence: FPGINYPVLTPNLK, m/z:786.9281, charge:+ 2, Modification: , Mod Position:

Score: 36.57, Raw data:WET\_B4\_090616\_01.mzxml, MS/MS Elution time: 67.02766, Scan number:3687, Mass delta:-0.0107, Rank:1

| No | b       | b++    | b*      | b*++   | b0      | b0++   | Seq | y       | y++    | y*      | y*++   | y0      | y0++   | RevNo |
|----|---------|--------|---------|--------|---------|--------|-----|---------|--------|---------|--------|---------|--------|-------|
| 1  | 148.08  | 74.54  |         |        |         |        | F   |         |        |         |        |         |        | 14    |
| 2  | 245.13  | 123.07 |         |        |         |        | P   | 1425.81 | 713.41 | 1408.78 | 704.9  | 1407.8  | 704.4  | 13    |
| 3  | 302.15  | 151.58 |         |        |         |        | G   | 1328.76 | 664.88 | 1311.73 | 656.37 | 1310.75 | 655.88 | 12    |
| 4  | 415.23  | 208.12 |         |        |         |        | I   | 1271.74 | 636.37 | 1254.71 | 627.86 | 1253.73 | 627.37 | 11    |
| 5  | 529.28  | 265.14 | 512.25  | 256.63 |         |        | N   | 1158.65 | 579.83 | 1141.63 | 571.32 | 1140.64 | 570.82 | 10    |
| 6  | 692.34  | 346.67 | 675.31  | 338.16 |         |        | Y   | 1044.61 | 522.81 | 1027.58 | 514.29 | 1026.6  | 513.8  | 9     |
| 7  | 789.39  | 395.2  | 772.37  | 386.69 |         |        | P   | 881.55  | 441.28 | 864.52  | 432.76 | 863.53  | 432.27 | 8     |
| 8  | 888.46  | 444.73 | 871.43  | 436.22 |         |        | V   | 784.49  | 392.75 | 767.47  | 384.24 | 766.48  | 383.74 | 7     |
| 9  | 1001.55 | 501.28 | 984.52  | 492.76 |         |        | L   | 685.42  | 343.22 | 668.4   | 334.7  | 667.41  | 334.21 | 6     |
| 10 | 1102.59 | 551.8  | 1085.57 | 543.29 | 1084.58 | 542.79 | T   | 572.34  | 286.67 | 555.31  | 278.16 | 554.33  | 277.67 | 5     |
| 11 | 1199.65 | 600.33 | 1182.62 | 591.81 | 1181.64 | 591.32 | P   | 471.29  | 236.15 | 454.27  | 227.64 |         |        | 4     |
| 12 | 1313.69 | 657.35 | 1296.66 | 648.83 | 1295.68 | 648.34 | N   | 374.24  | 187.62 | 357.21  | 179.11 |         |        | 3     |

|    |         |        |         |        |         |        |   |        |       |        |        |  |  |   |
|----|---------|--------|---------|--------|---------|--------|---|--------|-------|--------|--------|--|--|---|
| 13 | 1426.77 | 713.89 | 1409.75 | 705.38 | 1408.76 | 704.88 | L | 260.2  | 130.6 | 243.17 | 122.09 |  |  | 2 |
| 14 |         |        |         |        |         |        | K | 147.11 | 74.06 | 130.09 | 65.55  |  |  | 1 |

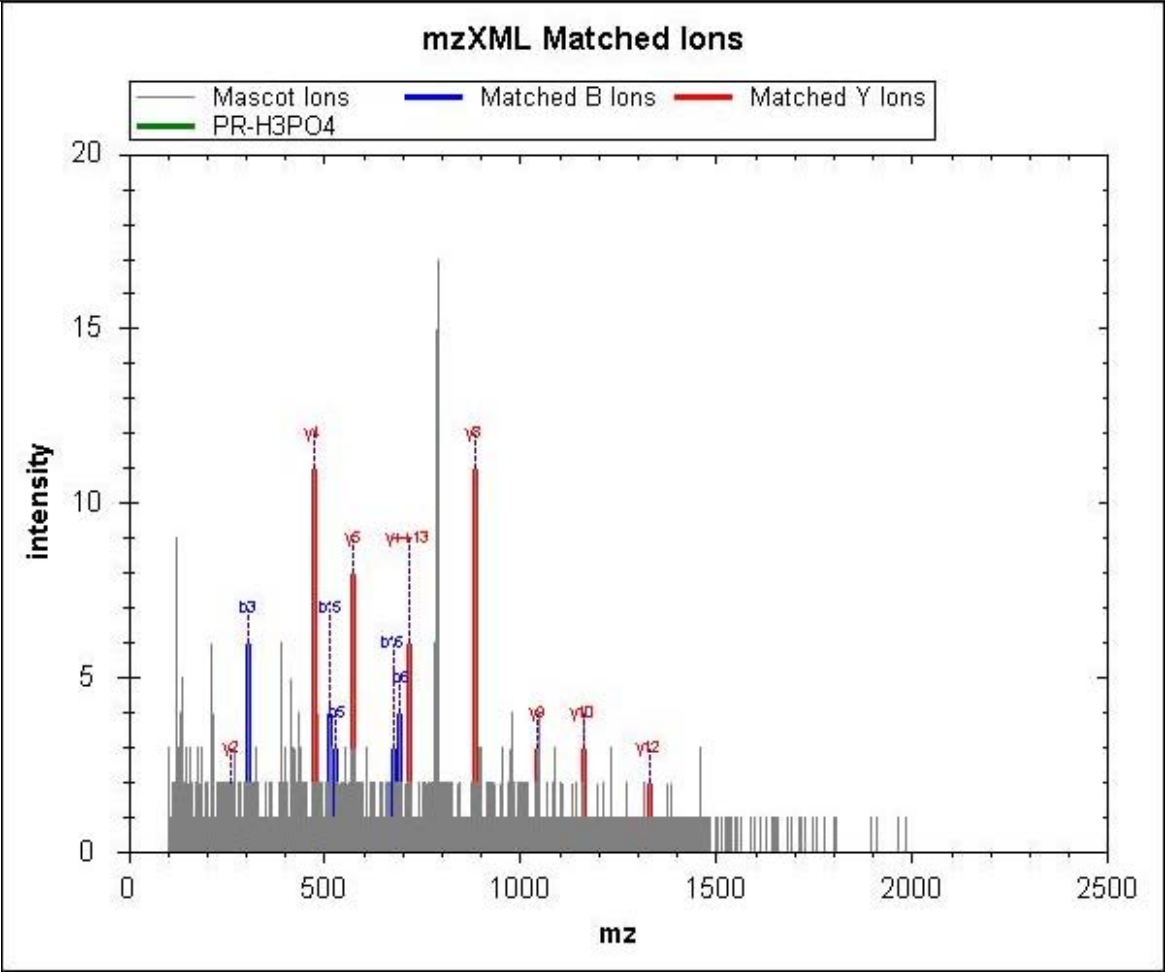

Protein index=800, ACC No:IP100005179

Peptide index=6402 MS/MS spectrum

Sequence: LLPDITLLEPVEGEAAEELSR, m/z:1147.604, charge:+ 2, Modification: , Mod Position:

Score: 64.03, Raw data:WET\_B4\_090616\_03.mzxml, MS/MS Elution time: 87.53899, Scan number:4887, Mass delta:0.0038, Rank:1

| No | b       | b++    | b0      | b0++   | Seq | y       | y++     | y*      | y*++    | y0      | y0++    | RevNo |
|----|---------|--------|---------|--------|-----|---------|---------|---------|---------|---------|---------|-------|
| 1  | 114.09  | 57.55  |         |        | L   |         |         |         |         |         |         | 21    |
| 2  | 227.18  | 114.09 |         |        | L   | 2181.13 | 1091.07 | 2164.1  | 1082.55 | 2163.12 | 1082.06 | 20    |
| 3  | 324.23  | 162.62 |         |        | P   | 2068.04 | 1034.53 | 2051.02 | 1026.01 | 2050.03 | 1025.52 | 19    |
| 4  | 439.26  | 220.13 | 421.24  | 211.13 | D   | 1970.99 | 986     | 1953.97 | 977.49  | 1952.98 | 976.99  | 18    |
| 5  | 552.34  | 276.67 | 534.33  | 267.67 | I   | 1855.96 | 928.49  | 1838.94 | 919.97  | 1837.95 | 919.48  | 17    |
| 6  | 653.39  | 327.2  | 635.38  | 318.19 | T   | 1742.88 | 871.94  | 1725.85 | 863.43  | 1724.87 | 862.94  | 16    |
| 7  | 766.47  | 383.74 | 748.46  | 374.73 | L   | 1641.83 | 821.42  | 1624.81 | 812.91  | 1623.82 | 812.41  | 15    |
| 8  | 879.55  | 440.28 | 861.54  | 431.28 | L   | 1528.75 | 764.88  | 1511.72 | 756.36  | 1510.74 | 755.87  | 14    |
| 9  | 1008.6  | 504.8  | 990.59  | 495.8  | E   | 1415.66 | 708.34  | 1398.64 | 699.82  | 1397.65 | 699.33  | 13    |
| 10 | 1105.65 | 553.33 | 1087.64 | 544.32 | P   | 1286.62 | 643.81  | 1269.6  | 635.3   | 1268.61 | 634.81  | 12    |

|    |         |         |         |         |   |         |        |         |        |         |        |    |
|----|---------|---------|---------|---------|---|---------|--------|---------|--------|---------|--------|----|
| 11 | 1204.72 | 602.86  | 1186.71 | 593.86  | V | 1189.57 | 595.29 | 1172.54 | 586.78 | 1171.56 | 586.28 | 11 |
| 12 | 1333.76 | 667.38  | 1315.75 | 658.38  | E | 1090.5  | 545.75 | 1073.47 | 537.24 | 1072.49 | 536.75 | 10 |
| 13 | 1390.78 | 695.9   | 1372.77 | 686.89  | G | 961.46  | 481.23 | 944.43  | 472.72 | 943.45  | 472.23 | 9  |
| 14 | 1519.83 | 760.42  | 1501.81 | 751.41  | E | 904.44  | 452.72 | 887.41  | 444.21 | 886.43  | 443.72 | 8  |
| 15 | 1590.86 | 795.93  | 1572.85 | 786.93  | A | 775.39  | 388.2  | 758.37  | 379.69 | 757.38  | 379.2  | 7  |
| 16 | 1661.9  | 831.45  | 1643.89 | 822.45  | A | 704.36  | 352.68 | 687.33  | 344.17 | 686.35  | 343.68 | 6  |
| 17 | 1790.94 | 895.97  | 1772.93 | 886.97  | E | 633.32  | 317.16 | 616.29  | 308.65 | 615.31  | 308.16 | 5  |
| 18 | 1919.98 | 960.5   | 1901.97 | 951.49  | E | 504.28  | 252.64 | 487.25  | 244.13 | 486.27  | 243.64 | 4  |
| 19 | 2033.07 | 1017.04 | 2015.06 | 1008.03 | L | 375.24  | 188.12 | 358.21  | 179.61 | 357.22  | 179.12 | 3  |
| 20 | 2120.1  | 1060.55 | 2102.09 | 1051.55 | S | 262.15  | 131.58 | 245.12  | 123.07 | 244.14  | 122.57 | 2  |
| 21 |         |         |         |         | R | 175.12  | 88.06  | 158.09  | 79.55  |         |        | 1  |

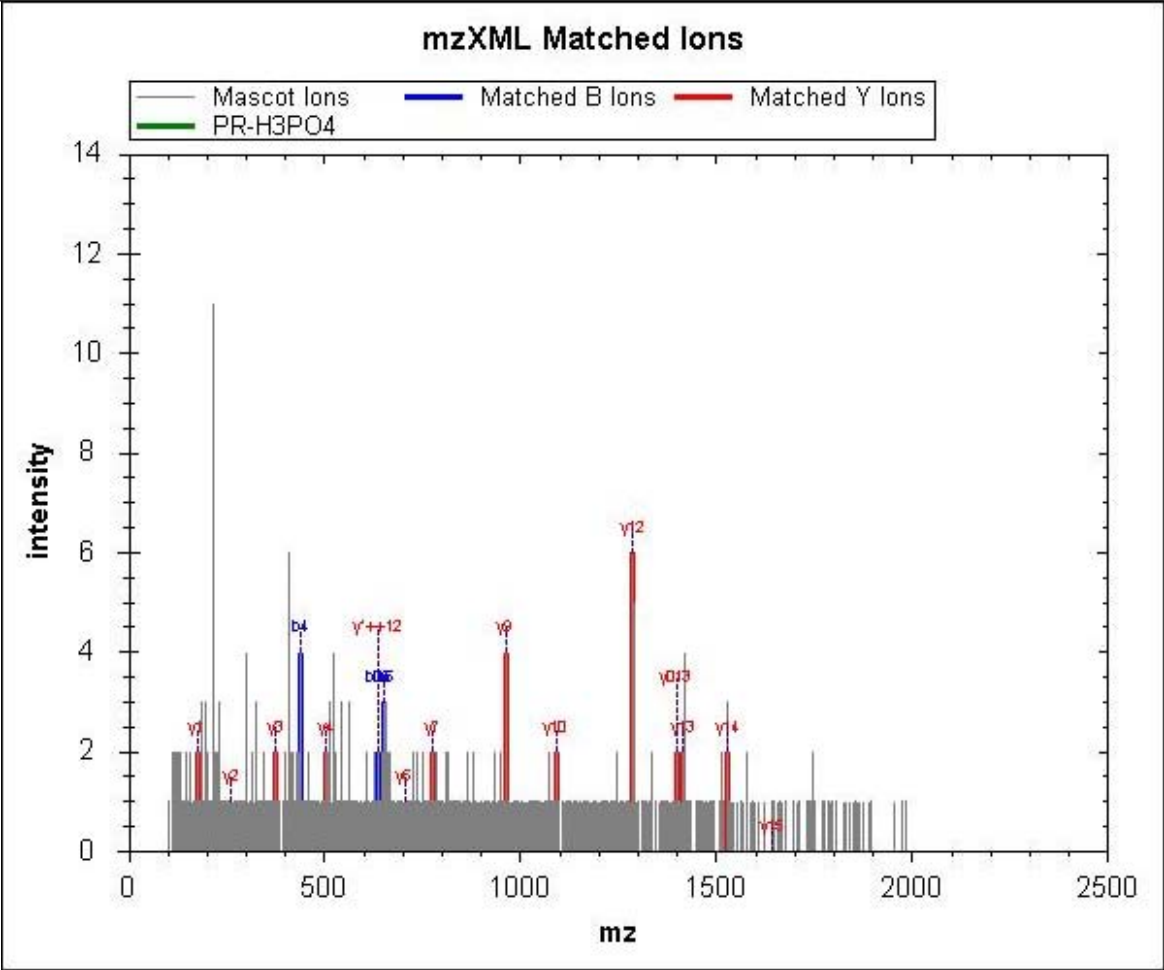

Protein index=803, ACC No:IPI00019269

Peptide index=7123 MS/MS spectrum

Sequence: YLASGAIDGIINIFDIATGK, m/z:1026.558, charge:+ 2, Modification: , Mod Position:

Score: 85.63, Raw data:WET\_A4\_090615\_03.mzxml, MS/MS Elution time: 108.1053, Scan number:6091, Mass delta:-0.003, Rank:1

| No | b      | b++   | b* | b*++ | b0 | b0++ | Seq | y | y++ | y* | y*++ | y0 | y0++ | RevNo |
|----|--------|-------|----|------|----|------|-----|---|-----|----|------|----|------|-------|
| 1  | 164.07 | 82.54 |    |      |    |      | Y   |   |     |    |      |    |      | 20    |



Peptide index=6429 MS/MS spectrum

Sequence: LVLLELNFLPTTGTK, m/z:829.99, charge:+ 2, Modification: , Mod Position:

Score: 52.43, Raw data:WET\_A4\_090615\_01.mzxml, MS/MS Elution time: 88.05933, Scan number:4893, Mass delta:-0.0001, Rank:1

| No | b       | b++    | b*      | b*++   | b0      | b0++   | Seq | y       | y++    | y*      | y*++   | y0      | y0++   | RevNo |
|----|---------|--------|---------|--------|---------|--------|-----|---------|--------|---------|--------|---------|--------|-------|
| 1  | 114.09  | 57.55  |         |        |         |        | L   |         |        |         |        |         |        | 15    |
| 2  | 213.16  | 107.08 |         |        |         |        | V   | 1545.89 | 773.45 | 1528.86 | 764.93 | 1527.88 | 764.44 | 14    |
| 3  | 326.24  | 163.63 |         |        |         |        | L   | 1446.82 | 723.91 | 1429.79 | 715.4  | 1428.81 | 714.91 | 13    |
| 4  | 439.33  | 220.17 |         |        |         |        | L   | 1333.74 | 667.37 | 1316.71 | 658.86 | 1315.73 | 658.37 | 12    |
| 5  | 568.37  | 284.69 |         |        | 550.36  | 275.68 | E   | 1220.65 | 610.83 | 1203.63 | 602.32 | 1202.64 | 601.82 | 11    |
| 6  | 681.45  | 341.23 |         |        | 663.44  | 332.23 | L   | 1091.61 | 546.31 | 1074.58 | 537.8  | 1073.6  | 537.3  | 10    |
| 7  | 795.5   | 398.25 | 778.47  | 389.74 | 777.49  | 389.25 | N   | 978.53  | 489.77 | 961.5   | 481.25 | 960.51  | 480.76 | 9     |
| 8  | 942.57  | 471.79 | 925.54  | 463.27 | 924.56  | 462.78 | F   | 864.48  | 432.74 | 847.46  | 424.23 | 846.47  | 423.74 | 8     |
| 9  | 1055.65 | 528.33 | 1038.62 | 519.82 | 1037.64 | 519.32 | L   | 717.41  | 359.21 | 700.39  | 350.7  | 699.4   | 350.21 | 7     |
| 10 | 1152.7  | 576.85 | 1135.68 | 568.34 | 1134.69 | 567.85 | P   | 604.33  | 302.67 | 587.3   | 294.16 | 586.32  | 293.66 | 6     |
| 11 | 1253.75 | 627.38 | 1236.72 | 618.87 | 1235.74 | 618.37 | T   | 507.28  | 254.14 | 490.25  | 245.63 | 489.27  | 245.14 | 5     |
| 12 | 1354.8  | 677.9  | 1337.77 | 669.39 | 1336.79 | 668.9  | T   | 406.23  | 203.62 | 389.2   | 195.11 | 388.22  | 194.61 | 4     |
| 13 | 1411.82 | 706.41 | 1394.79 | 697.9  | 1393.81 | 697.41 | G   | 305.18  | 153.09 | 288.16  | 144.58 | 287.17  | 144.09 | 3     |
| 14 | 1512.87 | 756.94 | 1495.84 | 748.42 | 1494.86 | 747.93 | T   | 248.16  | 124.58 | 231.13  | 116.07 | 230.15  | 115.58 | 2     |
| 15 |         |        |         |        |         |        | K   | 147.11  | 74.06  | 130.09  | 65.55  |         |        | 1     |

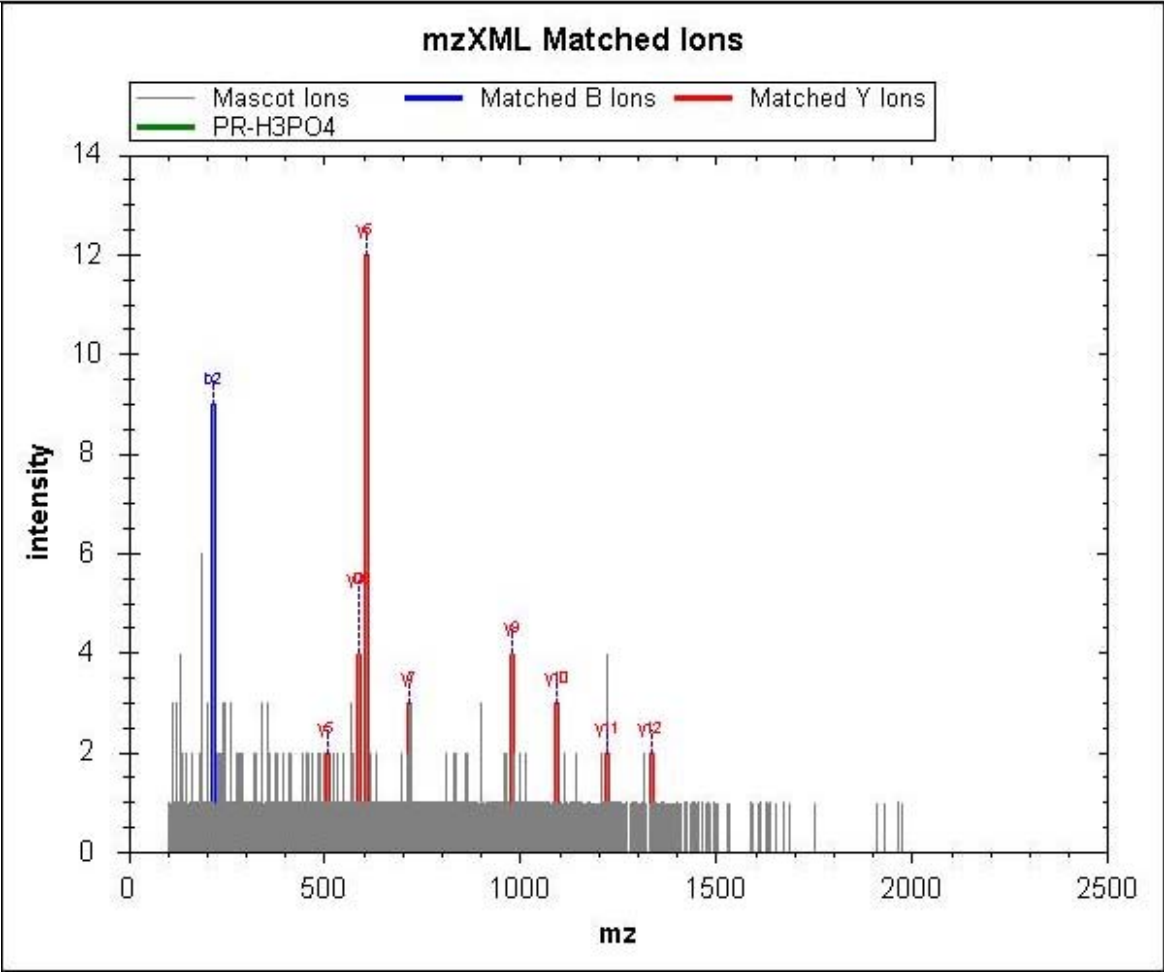

Protein index=826, ACC No:IPI00018262

Peptide index=2663 MS/MS spectrum

Sequence: VSGGLEVLAEK, m/z:551.3064, charge:+ 2, Modification: , Mod Position:

Score: 58.72, Raw data:WET\_A4\_090615\_02.mzxml, MS/MS Elution time: 46.21817, Scan number:2456, Mass delta:-0.0089, Rank:1

| No | b      | b++    | b0     | b0++   | Seq | y       | y++    | y*     | y*++   | y0     | y0++   | RevNo |
|----|--------|--------|--------|--------|-----|---------|--------|--------|--------|--------|--------|-------|
| 1  | 100.08 | 50.54  |        |        | V   |         |        |        |        |        |        | 11    |
| 2  | 187.11 | 94.06  | 169.1  | 85.05  | S   | 1002.55 | 501.78 | 985.52 | 493.26 | 984.54 | 492.77 | 10    |
| 3  | 244.13 | 122.57 | 226.12 | 113.56 | G   | 915.51  | 458.26 | 898.49 | 449.75 | 897.5  | 449.26 | 9     |
| 4  | 301.15 | 151.08 | 283.14 | 142.07 | G   | 858.49  | 429.75 | 841.47 | 421.24 | 840.48 | 420.74 | 8     |
| 5  | 414.23 | 207.62 | 396.22 | 198.62 | L   | 801.47  | 401.24 | 784.45 | 392.73 | 783.46 | 392.23 | 7     |
| 6  | 543.28 | 272.14 | 525.27 | 263.14 | E   | 688.39  | 344.7  | 671.36 | 336.18 | 670.38 | 335.69 | 6     |
| 7  | 642.35 | 321.68 | 624.34 | 312.67 | V   | 559.34  | 280.18 | 542.32 | 271.66 | 541.33 | 271.17 | 5     |
| 8  | 755.43 | 378.22 | 737.42 | 369.21 | L   | 460.28  | 230.64 | 443.25 | 222.13 | 442.27 | 221.64 | 4     |
| 9  | 826.47 | 413.74 | 808.46 | 404.73 | A   | 347.19  | 174.1  | 330.17 | 165.59 | 329.18 | 165.09 | 3     |
| 10 | 955.51 | 478.26 | 937.5  | 469.25 | E   | 276.16  | 138.58 | 259.13 | 130.07 | 258.14 | 129.58 | 2     |
| 11 |        |        |        |        | K   | 147.11  | 74.06  | 130.09 | 65.55  |        |        | 1     |

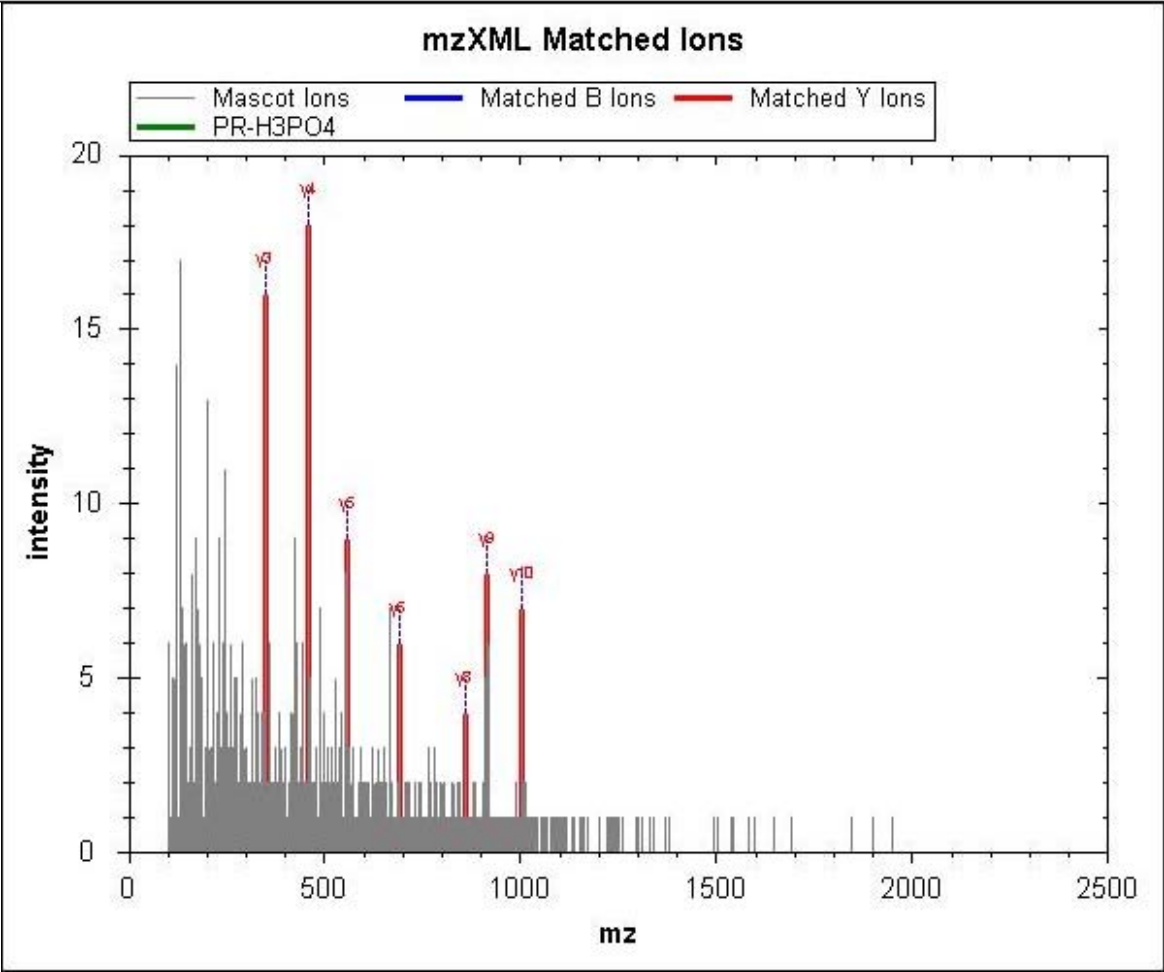

Protein index=834, ACC No:IPI00021926

Peptide index=5642 MS/MS spectrum

Sequence: ALQSVGQIVGEVLK, m/z:720.9227, charge:+ 2, Modification: , Mod Position:

Score: 77.3, Raw data:WET\_B4\_090616\_01.mzxml, MS/MS Elution time: 76.25267, Scan number:4227, Mass delta:0.01, Rank:1

| No | b       | b++    | b*      | b*++   | b0      | b0++   | Seq | y       | y++    | y*      | y*++   | y0      | y0++   | RevNo |
|----|---------|--------|---------|--------|---------|--------|-----|---------|--------|---------|--------|---------|--------|-------|
| 1  | 72.04   | 36.53  |         |        |         |        | A   |         |        |         |        |         |        | 14    |
| 2  | 185.13  | 93.07  |         |        |         |        | L   | 1369.81 | 685.41 | 1352.78 | 676.89 | 1351.79 | 676.4  | 13    |
| 3  | 313.19  | 157.1  | 296.16  | 148.58 |         |        | Q   | 1256.72 | 628.86 | 1239.69 | 620.35 | 1238.71 | 619.86 | 12    |
| 4  | 400.22  | 200.61 | 383.19  | 192.1  | 382.21  | 191.61 | S   | 1128.66 | 564.83 | 1111.64 | 556.32 | 1110.65 | 555.83 | 11    |
| 5  | 499.29  | 250.15 | 482.26  | 241.63 | 481.28  | 241.14 | V   | 1041.63 | 521.32 | 1024.6  | 512.81 | 1023.62 | 512.31 | 10    |
| 6  | 556.31  | 278.66 | 539.28  | 270.14 | 538.3   | 269.65 | G   | 942.56  | 471.78 | 925.54  | 463.27 | 924.55  | 462.78 | 9     |
| 7  | 684.37  | 342.69 | 667.34  | 334.17 | 666.36  | 333.68 | Q   | 885.54  | 443.27 | 868.51  | 434.76 | 867.53  | 434.27 | 8     |
| 8  | 797.45  | 399.23 | 780.43  | 390.72 | 779.44  | 390.22 | I   | 757.48  | 379.24 | 740.46  | 370.73 | 739.47  | 370.24 | 7     |
| 9  | 896.52  | 448.76 | 879.49  | 440.25 | 878.51  | 439.76 | V   | 644.4   | 322.7  | 627.37  | 314.19 | 626.39  | 313.7  | 6     |
| 10 | 953.54  | 477.27 | 936.51  | 468.76 | 935.53  | 468.27 | G   | 545.33  | 273.17 | 528.3   | 264.66 | 527.32  | 264.16 | 5     |
| 11 | 1082.58 | 541.8  | 1065.56 | 533.28 | 1064.57 | 532.79 | E   | 488.31  | 244.66 | 471.28  | 236.14 | 470.3   | 235.65 | 4     |
| 12 | 1181.65 | 591.33 | 1164.63 | 582.82 | 1163.64 | 582.32 | V   | 359.27  | 180.14 | 342.24  | 171.62 |         |        | 3     |

|    |         |        |         |        |         |        |   |        |       |        |        |  |   |
|----|---------|--------|---------|--------|---------|--------|---|--------|-------|--------|--------|--|---|
| 13 | 1294.74 | 647.87 | 1277.71 | 639.36 | 1276.73 | 638.87 | L | 260.2  | 130.6 | 243.17 | 122.09 |  | 2 |
| 14 |         |        |         |        |         |        | K | 147.11 | 74.06 | 130.09 | 65.55  |  | 1 |

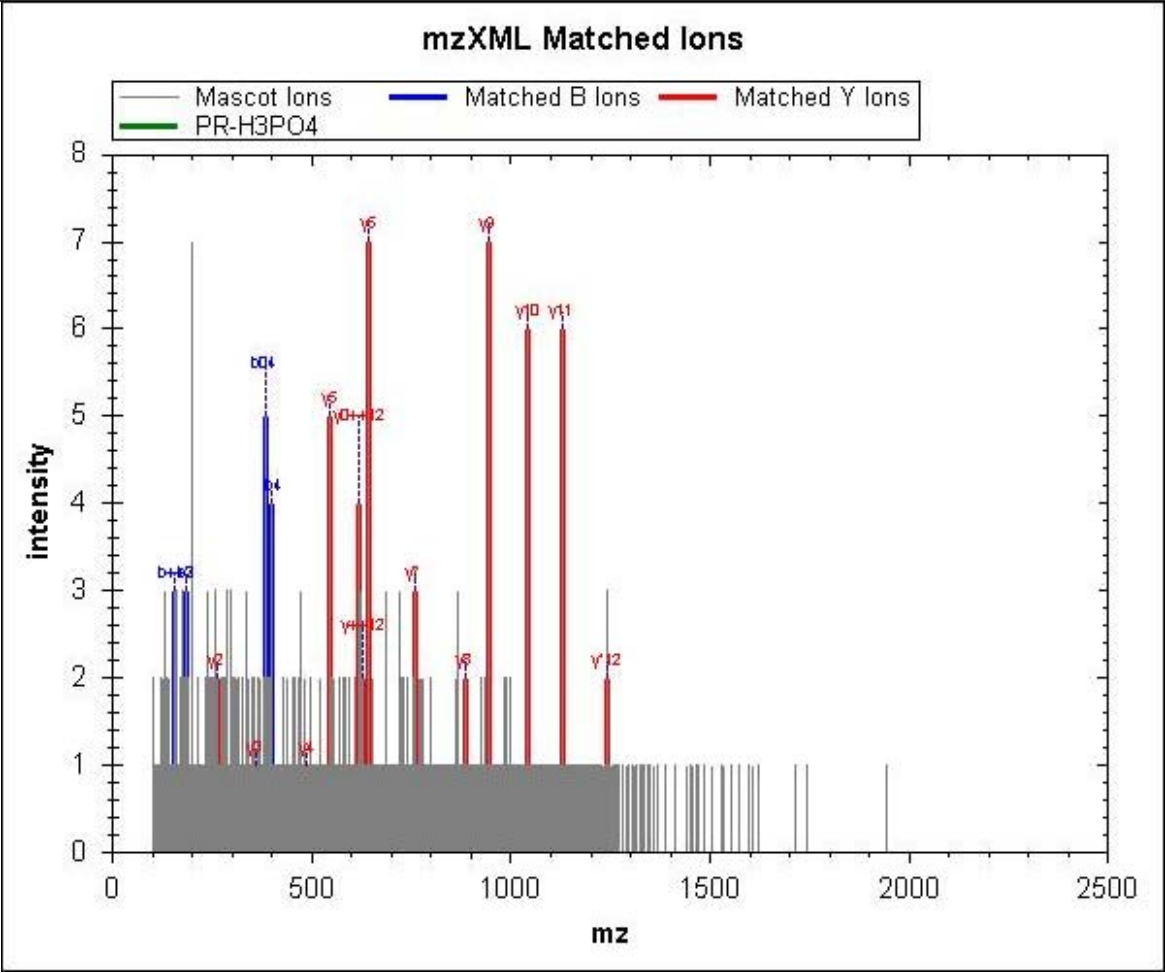

Protein index=841, ACC No:IP100034069

Peptide index=5798 MS/MS spectrum

Sequence: NLGIEAVPWTADIPLK, m/z:868.9732, charge:+ 2, Modification: , Mod Position:

Score: 47.45, Raw data:WET\_B4\_090616\_02.mzxml, MS/MS Elution time: 78.20116, Scan number:4312, Mass delta:-0.0112, Rank:1

| No | b       | b++    | b*      | b*++   | b0      | b0++   | Seq | y       | y++    | y*      | y*++   | y0      | y0++   | RevNo |
|----|---------|--------|---------|--------|---------|--------|-----|---------|--------|---------|--------|---------|--------|-------|
| 1  | 115.05  | 58.03  | 98.02   | 49.52  |         |        | N   |         |        |         |        |         |        | 16    |
| 2  | 228.13  | 114.57 | 211.11  | 106.06 |         |        | L   | 1622.92 | 811.96 | 1605.89 | 803.45 | 1604.9  | 802.96 | 15    |
| 3  | 285.16  | 143.08 | 268.13  | 134.57 |         |        | G   | 1509.83 | 755.42 | 1492.8  | 746.91 | 1491.82 | 746.41 | 14    |
| 4  | 398.24  | 199.62 | 381.21  | 191.11 |         |        | I   | 1452.81 | 726.91 | 1435.78 | 718.4  | 1434.8  | 717.9  | 13    |
| 5  | 527.28  | 264.14 | 510.26  | 255.63 | 509.27  | 255.14 | E   | 1339.73 | 670.37 | 1322.7  | 661.85 | 1321.71 | 661.36 | 12    |
| 6  | 598.32  | 299.66 | 581.29  | 291.15 | 580.31  | 290.66 | A   | 1210.68 | 605.85 | 1193.66 | 597.33 | 1192.67 | 596.84 | 11    |
| 7  | 697.39  | 349.2  | 680.36  | 340.68 | 679.38  | 340.19 | V   | 1139.65 | 570.33 | 1122.62 | 561.81 | 1121.64 | 561.32 | 10    |
| 8  | 794.44  | 397.72 | 777.41  | 389.21 | 776.43  | 388.72 | P   | 1040.58 | 520.79 | 1023.55 | 512.28 | 1022.57 | 511.79 | 9     |
| 9  | 980.52  | 490.76 | 963.49  | 482.25 | 962.51  | 481.76 | W   | 943.52  | 472.27 | 926.5   | 463.75 | 925.51  | 463.26 | 8     |
| 10 | 1081.57 | 541.29 | 1064.54 | 532.77 | 1063.56 | 532.28 | T   | 757.45  | 379.23 | 740.42  | 370.71 | 739.43  | 370.22 | 7     |



|    |         |         |         |         |         |         |   |         |        |         |        |         |        |    |
|----|---------|---------|---------|---------|---------|---------|---|---------|--------|---------|--------|---------|--------|----|
| 7  | 819.42  | 410.22  | 802.4   | 401.7   | 801.41  | 401.21  | L | 1739.91 | 870.46 | 1722.88 | 861.94 | 1721.9  | 861.45 | 16 |
| 8  | 918.49  | 459.75  | 901.47  | 451.24  | 900.48  | 450.74  | V | 1626.82 | 813.92 | 1609.8  | 805.4  | 1608.81 | 804.91 | 15 |
| 9  | 1046.55 | 523.78  | 1029.53 | 515.27  | 1028.54 | 514.77  | Q | 1527.76 | 764.38 | 1510.73 | 755.87 | 1509.74 | 755.38 | 14 |
| 10 | 1117.59 | 559.3   | 1100.56 | 550.78  | 1099.58 | 550.29  | A | 1399.7  | 700.35 | 1382.67 | 691.84 | 1381.69 | 691.35 | 13 |
| 11 | 1264.66 | 632.83  | 1247.63 | 624.32  | 1246.65 | 623.83  | F | 1328.66 | 664.83 | 1311.63 | 656.32 | 1310.65 | 655.83 | 12 |
| 12 | 1365.7  | 683.36  | 1348.68 | 674.84  | 1347.69 | 674.35  | T | 1181.59 | 591.3  | 1164.56 | 582.79 | 1163.58 | 582.29 | 11 |
| 13 | 1502.76 | 751.89  | 1485.74 | 743.37  | 1484.75 | 742.88  | H | 1080.54 | 540.78 | 1063.52 | 532.26 | 1062.53 | 531.77 | 10 |
| 14 | 1573.8  | 787.4   | 1556.77 | 778.89  | 1555.79 | 778.4   | A | 943.48  | 472.25 | 926.46  | 463.73 | 925.47  | 463.24 | 9  |
| 15 | 1670.85 | 835.93  | 1653.83 | 827.42  | 1652.84 | 826.93  | P | 872.45  | 436.73 | 855.42  | 428.21 | 854.44  | 427.72 | 8  |
| 16 | 1741.89 | 871.45  | 1724.86 | 862.94  | 1723.88 | 862.44  | A | 775.39  | 388.2  | 758.37  | 379.69 | 757.38  | 379.2  | 7  |
| 17 | 1842.94 | 921.97  | 1825.91 | 913.46  | 1824.93 | 912.97  | T | 704.36  | 352.68 | 687.33  | 344.17 | 686.35  | 343.68 | 6  |
| 18 | 1956.02 | 978.52  | 1939    | 970     | 1938.01 | 969.51  | L | 603.31  | 302.16 | 586.28  | 293.65 | 585.3   | 293.15 | 5  |
| 19 | 2085.07 | 1043.04 | 2068.04 | 1034.52 | 2067.05 | 1034.03 | E | 490.23  | 245.62 | 473.2   | 237.1  | 472.22  | 236.61 | 4  |
| 20 | 2156.1  | 1078.55 | 2139.08 | 1070.04 | 2138.09 | 1069.55 | A | 361.18  | 181.1  | 344.16  | 172.58 | 343.17  | 172.09 | 3  |
| 21 | 2271.13 | 1136.07 | 2254.1  | 1127.55 | 2253.12 | 1127.06 | D | 290.15  | 145.58 | 273.12  | 137.06 | 272.14  | 136.57 | 2  |
| 22 |         |         |         |         |         |         | R | 175.12  | 88.06  | 158.09  | 79.55  |         |        | 1  |

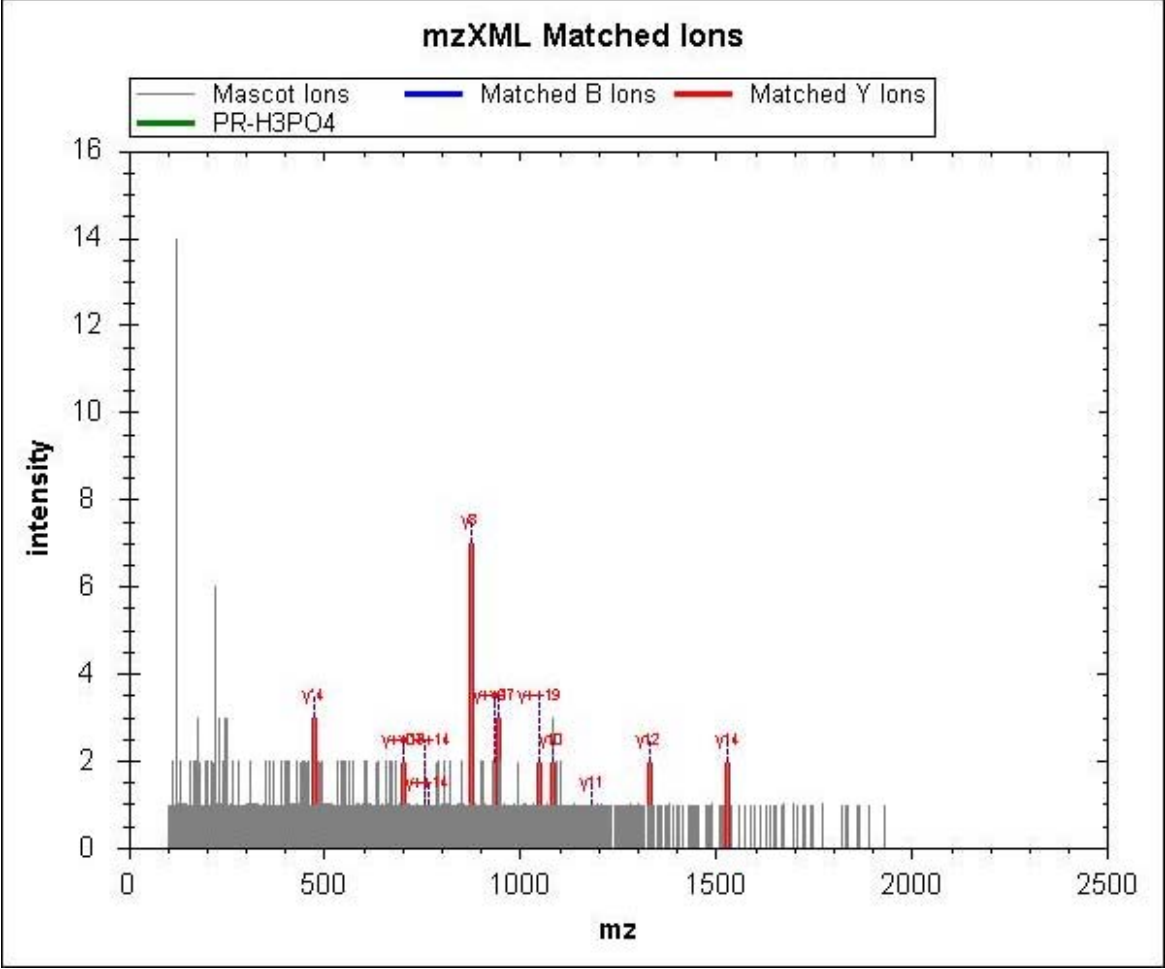

Protein index=856, ACC No:IPI00062344

Peptide index=7194 MS/MS spectrum

Sequence: FPFIPMPLDYILPELLK, m/z:1031.583, charge:+ 2, Modification: Oxidation (M), Mod Position:

0.000001000000000000.0

Score: 44.1, Raw data:WET\_A4\_090615\_03.mzxml, MS/MS Elution time: 111.6825, Scan number:6324, Mass delta:0.0238, Rank:1

| No | b       | b++    | b0      | b0++   | Seq | y       | y++    | y*      | y*++   | y0      | y0++   | RevNo |
|----|---------|--------|---------|--------|-----|---------|--------|---------|--------|---------|--------|-------|
| 1  | 148.08  | 74.54  |         |        | F   |         |        |         |        |         |        | 17    |
| 2  | 245.13  | 123.07 |         |        | P   | 1851.07 | 926.04 | 1834.04 | 917.52 | 1833.06 | 917.03 | 16    |
| 3  | 392.2   | 196.6  |         |        | F   | 1754.01 | 877.51 | 1736.99 | 869    | 1736    | 868.51 | 15    |
| 4  | 505.28  | 253.14 |         |        | I   | 1606.95 | 803.98 | 1589.92 | 795.46 | 1588.93 | 794.97 | 14    |
| 5  | 602.33  | 301.67 |         |        | P   | 1493.86 | 747.43 | 1476.83 | 738.92 | 1475.85 | 738.43 | 13    |
| 6  | 685.37  | 343.19 |         |        | M   | 1396.81 | 698.91 | 1379.78 | 690.39 | 1378.8  | 689.9  | 12    |
| 7  | 782.42  | 391.72 |         |        | P   | 1313.77 | 657.39 | 1296.74 | 648.88 | 1295.76 | 648.38 | 11    |
| 8  | 895.51  | 448.26 |         |        | L   | 1216.72 | 608.86 | 1199.69 | 600.35 | 1198.71 | 599.86 | 10    |
| 9  | 1010.53 | 505.77 | 992.52  | 496.77 | D   | 1103.63 | 552.32 | 1086.61 | 543.81 | 1085.62 | 543.32 | 9     |
| 10 | 1173.6  | 587.3  | 1155.59 | 578.3  | Y   | 988.61  | 494.81 | 971.58  | 486.29 | 970.6   | 485.8  | 8     |
| 11 | 1286.68 | 643.84 | 1268.67 | 634.84 | I   | 825.54  | 413.28 | 808.52  | 404.76 | 807.53  | 404.27 | 7     |
| 12 | 1399.77 | 700.39 | 1381.76 | 691.38 | L   | 712.46  | 356.73 | 695.43  | 348.22 | 694.45  | 347.73 | 6     |
| 13 | 1496.82 | 748.91 | 1478.81 | 739.91 | P   | 599.38  | 300.19 | 582.35  | 291.68 | 581.37  | 291.19 | 5     |
| 14 | 1625.86 | 813.43 | 1607.85 | 804.43 | E   | 502.32  | 251.67 | 485.3   | 243.15 | 484.31  | 242.66 | 4     |
| 15 | 1738.95 | 869.98 | 1720.93 | 860.97 | L   | 373.28  | 187.14 | 356.25  | 178.63 |         |        | 3     |
| 16 | 1852.03 | 926.52 | 1834.02 | 917.51 | L   | 260.2   | 130.6  | 243.17  | 122.09 |         |        | 2     |
| 17 |         |        |         |        | K   | 147.11  | 74.06  | 130.09  | 65.55  |         |        | 1     |

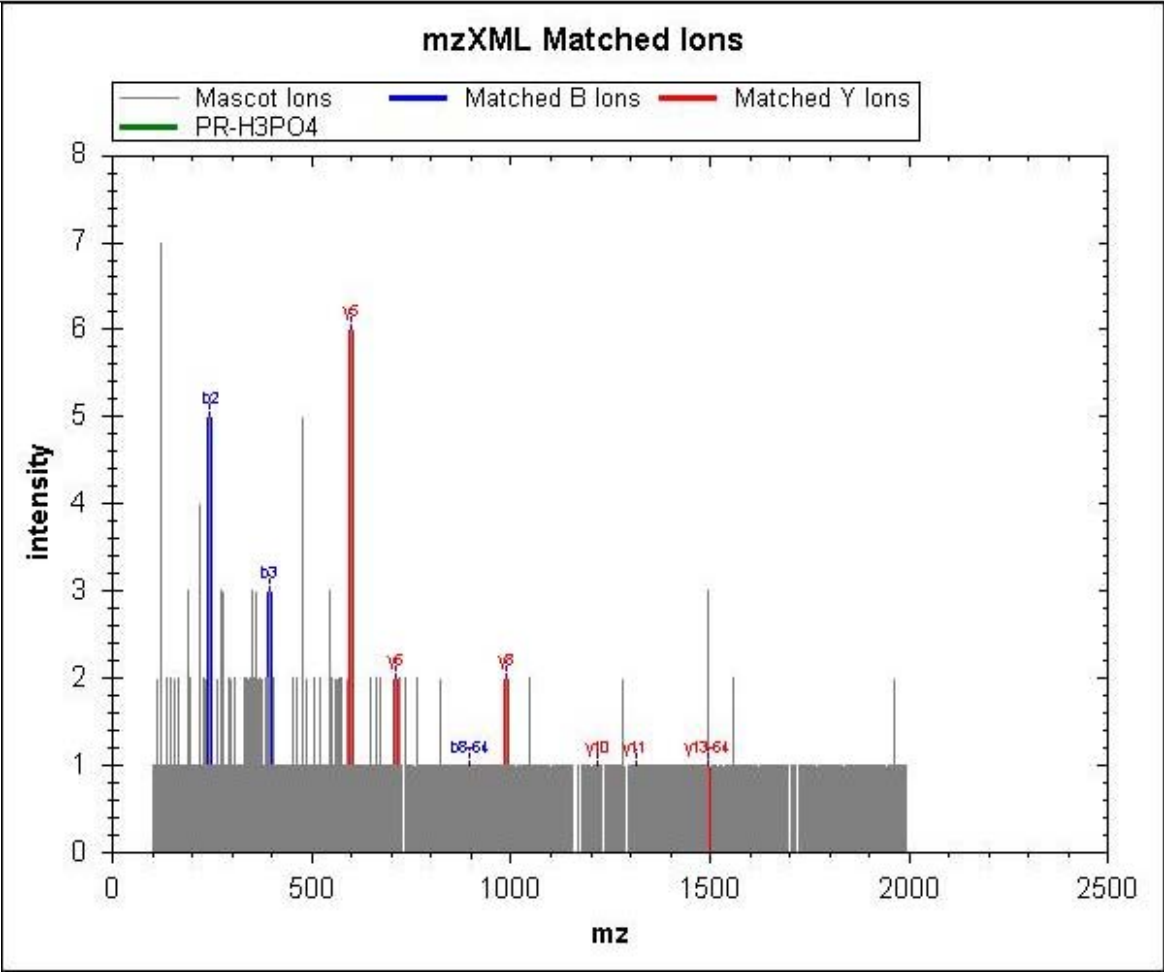

Protein index=861, ACC No:IPI00301994

Peptide index=1785 MS/MS spectrum

Sequence: ATDAMAHVAGFTVAHDVSAR, m/z:681.6564, charge:+ 3, Modification: Oxidation (M), Mod Position: 0.00001000000000000000.0

Score: 71.73, Raw data:WET\_A4\_090615\_03.mzxml, MS/MS Elution time: 37.59617, Scan number:1954, Mass delta:-0.0085, Rank:1

| No | b       | b++    | b0      | b0++   | Seq | y       | y++    | y*      | y*++   | y0      | y0++   | RevNo |
|----|---------|--------|---------|--------|-----|---------|--------|---------|--------|---------|--------|-------|
| 1  | 72.04   | 36.53  |         |        | A   |         |        |         |        |         |        | 20    |
| 2  | 173.09  | 87.05  | 155.08  | 78.04  | T   | 1907.94 | 954.47 | 1890.91 | 945.96 | 1889.93 | 945.47 | 19    |
| 3  | 288.12  | 144.56 | 270.11  | 135.56 | D   | 1806.89 | 903.95 | 1789.86 | 895.43 | 1788.88 | 894.94 | 18    |
| 4  | 359.16  | 180.08 | 341.15  | 171.08 | A   | 1691.86 | 846.43 | 1674.83 | 837.92 | 1673.85 | 837.43 | 17    |
| 5  | 442.19  | 221.6  | 424.18  | 212.59 | M   | 1620.82 | 810.92 | 1603.8  | 802.4  | 1602.81 | 801.91 | 16    |
| 6  | 513.23  | 257.12 | 495.22  | 248.11 | A   | 1537.79 | 769.4  | 1520.76 | 760.88 | 1519.78 | 760.39 | 15    |
| 7  | 650.29  | 325.65 | 632.28  | 316.64 | H   | 1466.75 | 733.88 | 1449.72 | 725.37 | 1448.74 | 724.87 | 14    |
| 8  | 749.36  | 375.18 | 731.35  | 366.18 | V   | 1329.69 | 665.35 | 1312.66 | 656.84 | 1311.68 | 656.34 | 13    |
| 9  | 820.39  | 410.7  | 802.38  | 401.7  | A   | 1230.62 | 615.81 | 1213.6  | 607.3  | 1212.61 | 606.81 | 12    |
| 10 | 877.42  | 439.21 | 859.41  | 430.21 | G   | 1159.59 | 580.3  | 1142.56 | 571.78 | 1141.57 | 571.29 | 11    |
| 11 | 1024.48 | 512.75 | 1006.47 | 503.74 | F   | 1102.56 | 551.79 | 1085.54 | 543.27 | 1084.55 | 542.78 | 10    |

|    |         |        |         |        |   |        |        |        |        |        |        |   |
|----|---------|--------|---------|--------|---|--------|--------|--------|--------|--------|--------|---|
| 12 | 1125.53 | 563.27 | 1107.52 | 554.26 | T | 955.5  | 478.25 | 938.47 | 469.74 | 937.48 | 469.25 | 9 |
| 13 | 1224.6  | 612.8  | 1206.59 | 603.8  | V | 854.45 | 427.73 | 837.42 | 419.21 | 836.44 | 418.72 | 8 |
| 14 | 1295.64 | 648.32 | 1277.63 | 639.32 | A | 755.38 | 378.19 | 738.35 | 369.68 | 737.37 | 369.19 | 7 |
| 15 | 1432.7  | 716.85 | 1414.69 | 707.85 | H | 684.34 | 342.67 | 667.32 | 334.16 | 666.33 | 333.67 | 6 |
| 16 | 1547.72 | 774.37 | 1529.71 | 765.36 | D | 547.28 | 274.15 | 530.26 | 265.63 | 529.27 | 265.14 | 5 |
| 17 | 1646.79 | 823.9  | 1628.78 | 814.89 | V | 432.26 | 216.63 | 415.23 | 208.12 | 414.25 | 207.63 | 4 |
| 18 | 1733.82 | 867.42 | 1715.81 | 858.41 | S | 333.19 | 167.1  | 316.16 | 158.58 | 315.18 | 158.09 | 3 |
| 19 | 1804.86 | 902.93 | 1786.85 | 893.93 | A | 246.16 | 123.58 | 229.13 | 115.07 |        |        | 2 |
| 20 |         |        |         |        | R | 175.12 | 88.06  | 158.09 | 79.55  |        |        | 1 |

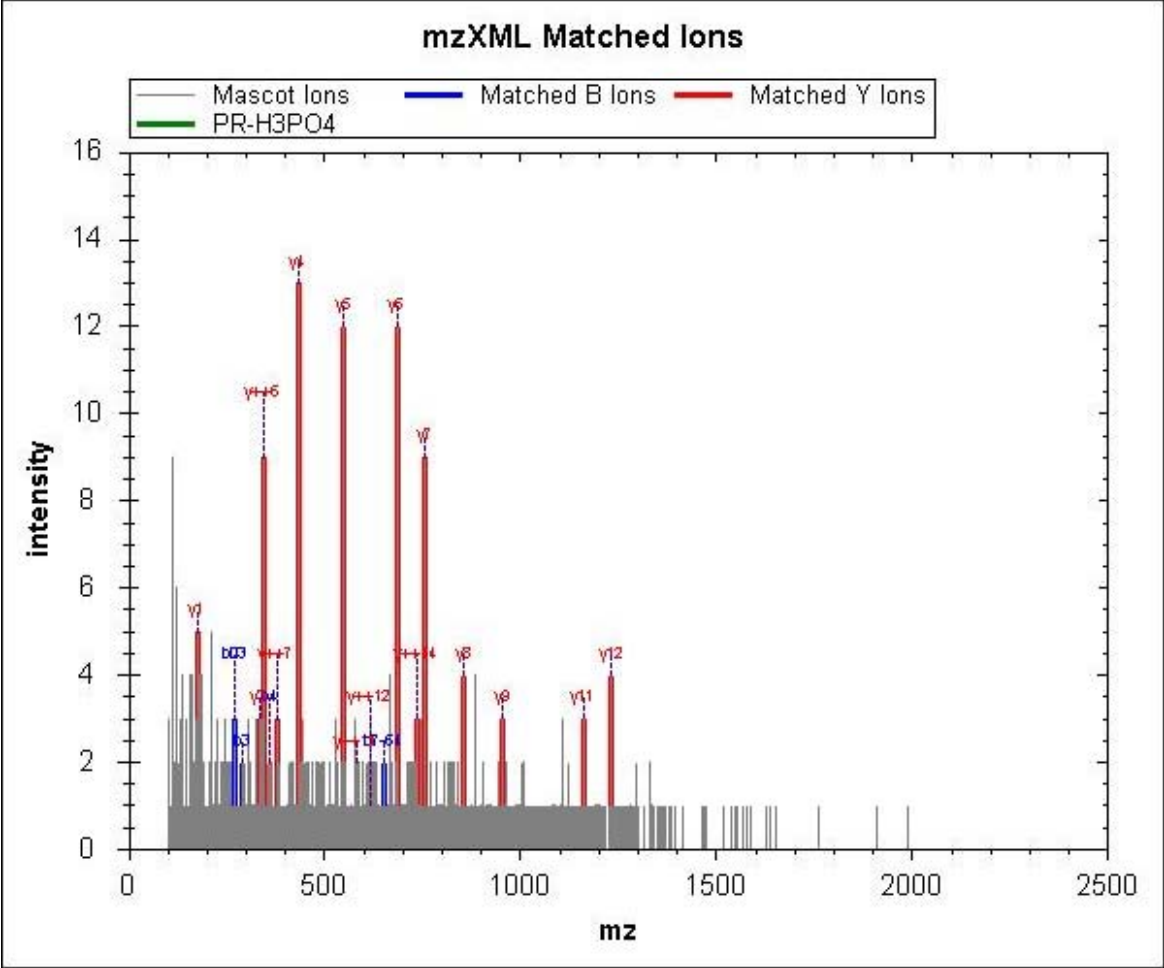

Protein index=862, ACC No:IPI00101405

Peptide index=2123 MS/MS spectrum

Sequence: VLTEDEMGHPEIGDAIAR, m/z:656.9796, charge:+ 3, Modification: Oxidation (M), Mod Position: 0.000000100000000000.0

Score: 73.4, Raw data:WET\_A4\_090615\_02.mzxml, MS/MS Elution time: 41.239, Scan number:2167, Mass delta:-0.0128, Rank:1

| No | b      | b++    | b0 | b0++ | Seq | y       | y++    | y*      | y*++   | y0      | y0++   | RevNo |
|----|--------|--------|----|------|-----|---------|--------|---------|--------|---------|--------|-------|
| 1  | 100.08 | 50.54  |    |      | V   |         |        |         |        |         |        | 18    |
| 2  | 213.16 | 107.08 |    |      | L   | 1805.87 | 903.44 | 1788.84 | 894.92 | 1787.86 | 894.43 | 17    |

|    |         |        |         |        |   |         |        |         |        |         |        |    |
|----|---------|--------|---------|--------|---|---------|--------|---------|--------|---------|--------|----|
| 3  | 314.21  | 157.61 | 296.2   | 148.6  | T | 1692.78 | 846.89 | 1675.76 | 838.38 | 1674.77 | 837.89 | 16 |
| 4  | 443.25  | 222.13 | 425.24  | 213.12 | E | 1591.73 | 796.37 | 1574.71 | 787.86 | 1573.72 | 787.37 | 15 |
| 5  | 558.28  | 279.64 | 540.27  | 270.64 | D | 1462.69 | 731.85 | 1445.67 | 723.34 | 1444.68 | 722.84 | 14 |
| 6  | 687.32  | 344.16 | 669.31  | 335.16 | E | 1347.67 | 674.34 | 1330.64 | 665.82 | 1329.65 | 665.33 | 13 |
| 7  | 770.36  | 385.68 | 752.35  | 376.68 | M | 1218.62 | 609.81 | 1201.6  | 601.3  | 1200.61 | 600.81 | 12 |
| 8  | 827.38  | 414.19 | 809.37  | 405.19 | G | 1135.59 | 568.3  | 1118.56 | 559.78 | 1117.57 | 559.29 | 11 |
| 9  | 964.44  | 482.72 | 946.43  | 473.72 | H | 1078.56 | 539.79 | 1061.54 | 531.27 | 1060.55 | 530.78 | 10 |
| 10 | 1061.49 | 531.25 | 1043.48 | 522.24 | P | 941.51  | 471.26 | 924.48  | 462.74 | 923.49  | 462.25 | 9  |
| 11 | 1190.53 | 595.77 | 1172.52 | 586.76 | E | 844.45  | 422.73 | 827.43  | 414.22 | 826.44  | 413.72 | 8  |
| 12 | 1303.62 | 652.31 | 1285.61 | 643.31 | I | 715.41  | 358.21 | 698.38  | 349.7  | 697.4   | 349.2  | 7  |
| 13 | 1360.64 | 680.82 | 1342.63 | 671.82 | G | 602.33  | 301.67 | 585.3   | 293.15 | 584.32  | 292.66 | 6  |
| 14 | 1475.67 | 738.34 | 1457.65 | 729.33 | D | 545.3   | 273.16 | 528.28  | 264.64 | 527.29  | 264.15 | 5  |
| 15 | 1546.7  | 773.85 | 1528.69 | 764.85 | A | 430.28  | 215.64 | 413.25  | 207.13 |         |        | 4  |
| 16 | 1659.79 | 830.4  | 1641.78 | 821.39 | I | 359.24  | 180.12 | 342.21  | 171.61 |         |        | 3  |
| 17 | 1730.82 | 865.92 | 1712.81 | 856.91 | A | 246.16  | 123.58 | 229.13  | 115.07 |         |        | 2  |
| 18 |         |        |         |        | R | 175.12  | 88.06  | 158.09  | 79.55  |         |        | 1  |

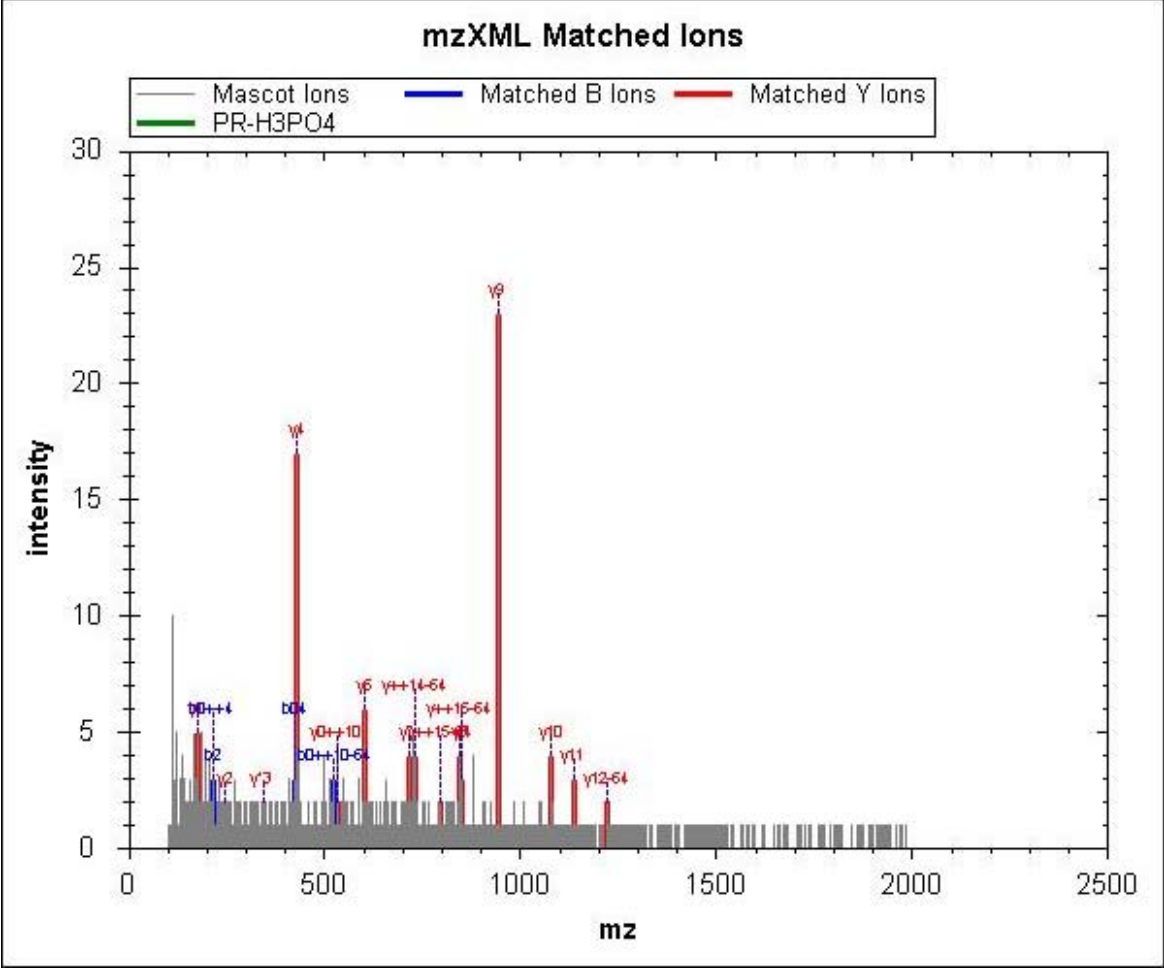

Protein index=877, ACC No:IPI00032799

Peptide index=1331 MS/MS spectrum

Sequence: GPLLVSTESHPVK, m/z:682.3795, charge:+ 2, Modification: , Mod Position:

Score: 57.65, Raw data:WET\_B4\_090616\_03.mzxml, MS/MS Elution time: 32.00767, Scan number:1635, Mass delta:-0.0067, Rank:1

| No | b       | b++    | b0      | b0++   | Seq | y       | y++    | y*      | y*++   | y0      | y0++   | RevNo |
|----|---------|--------|---------|--------|-----|---------|--------|---------|--------|---------|--------|-------|
| 1  | 58.03   | 29.52  |         |        | G   |         |        |         |        |         |        | 13    |
| 2  | 155.08  | 78.04  |         |        | P   | 1306.74 | 653.87 | 1289.71 | 645.36 | 1288.73 | 644.87 | 12    |
| 3  | 268.17  | 134.59 |         |        | L   | 1209.68 | 605.35 | 1192.66 | 596.83 | 1191.67 | 596.34 | 11    |
| 4  | 381.25  | 191.13 |         |        | L   | 1096.6  | 548.8  | 1079.57 | 540.29 | 1078.59 | 539.8  | 10    |
| 5  | 480.32  | 240.66 |         |        | V   | 983.52  | 492.26 | 966.49  | 483.75 | 965.51  | 483.26 | 9     |
| 6  | 567.35  | 284.18 | 549.34  | 275.17 | S   | 884.45  | 442.73 | 867.42  | 434.21 | 866.44  | 433.72 | 8     |
| 7  | 668.4   | 334.7  | 650.39  | 325.7  | T   | 797.42  | 399.21 | 780.39  | 390.7  | 779.4   | 390.21 | 7     |
| 8  | 797.44  | 399.22 | 779.43  | 390.22 | E   | 696.37  | 348.69 | 679.34  | 340.17 | 678.36  | 339.68 | 6     |
| 9  | 884.47  | 442.74 | 866.46  | 433.73 | S   | 567.32  | 284.17 | 550.3   | 275.65 | 549.31  | 275.16 | 5     |
| 10 | 1021.53 | 511.27 | 1003.52 | 502.26 | H   | 480.29  | 240.65 | 463.27  | 232.14 |         |        | 4     |
| 11 | 1118.58 | 559.8  | 1100.57 | 550.79 | P   | 343.23  | 172.12 | 326.21  | 163.61 |         |        | 3     |
| 12 | 1217.65 | 609.33 | 1199.64 | 600.32 | V   | 246.18  | 123.59 | 229.15  | 115.08 |         |        | 2     |
| 13 |         |        |         |        | K   | 147.11  | 74.06  | 130.09  | 65.55  |         |        | 1     |

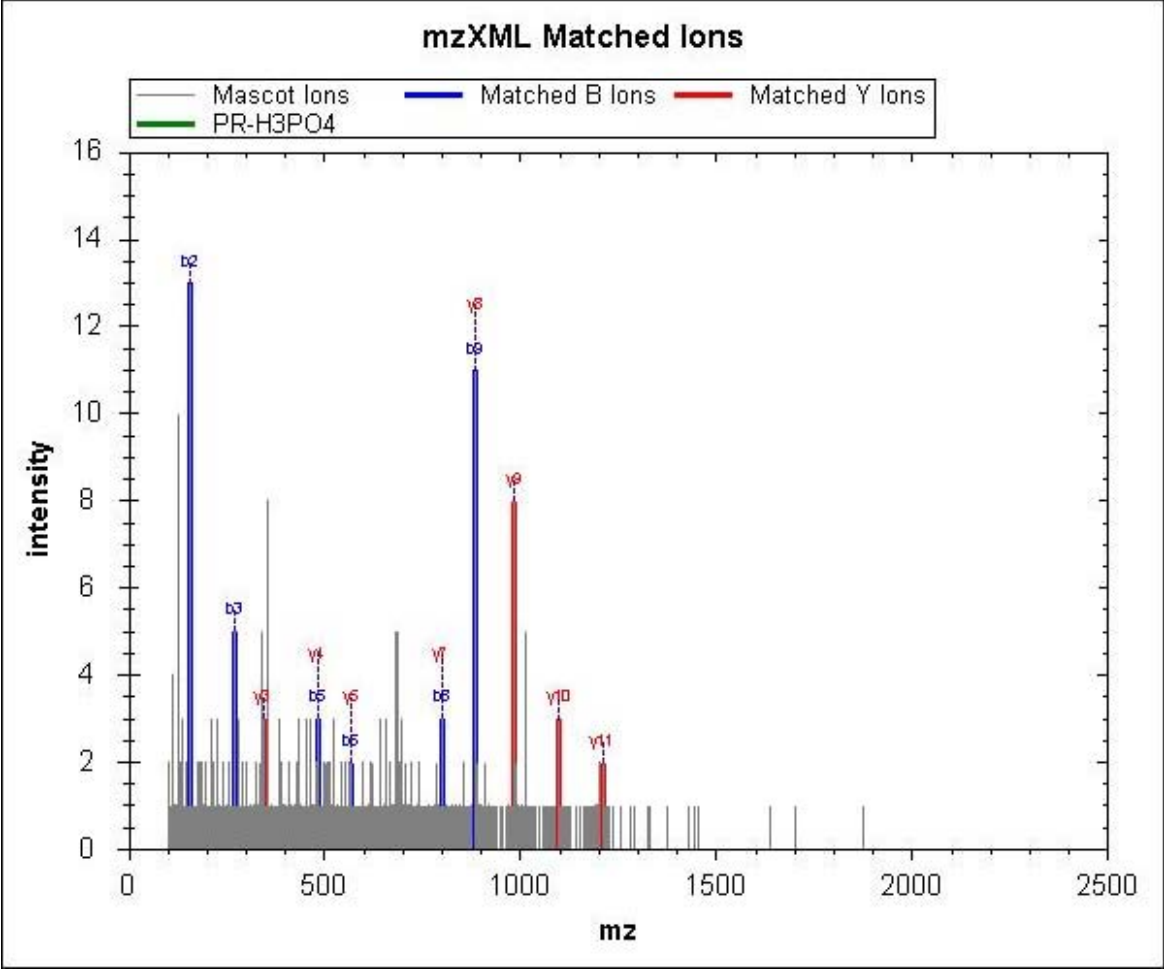

Protein index=879, ACC No:IP100073713

Peptide index=5002 MS/MS spectrum

Sequence: GFGEVTFADPASVDK, m/z:779.383, charge:+ 2, Modification: , Mod Position:

Score: 67.36, Raw data:WET\_A4\_090615\_02.mzxml, MS/MS Elution time: 68.039, Scan number:3723, Mass delta:-0.0061, Rank:1

| No | b       | b++    | b0      | b0++   | Seq | y       | y++    | y*      | y*++   | y0      | y0++   | RevNo |
|----|---------|--------|---------|--------|-----|---------|--------|---------|--------|---------|--------|-------|
| 1  | 58.03   | 29.52  |         |        | G   |         |        |         |        |         |        | 15    |
| 2  | 205.1   | 103.05 |         |        | F   | 1500.74 | 750.87 | 1483.71 | 742.36 | 1482.73 | 741.87 | 14    |
| 3  | 262.12  | 131.56 |         |        | G   | 1353.67 | 677.34 | 1336.64 | 668.82 | 1335.66 | 668.33 | 13    |
| 4  | 409.19  | 205.1  |         |        | F   | 1296.65 | 648.83 | 1279.62 | 640.31 | 1278.64 | 639.82 | 12    |
| 5  | 508.26  | 254.63 |         |        | V   | 1149.58 | 575.29 | 1132.55 | 566.78 | 1131.57 | 566.29 | 11    |
| 6  | 609.3   | 305.16 | 591.29  | 296.15 | T   | 1050.51 | 525.76 | 1033.48 | 517.25 | 1032.5  | 516.75 | 10    |
| 7  | 756.37  | 378.69 | 738.36  | 369.68 | F   | 949.46  | 475.23 | 932.44  | 466.72 | 931.45  | 466.23 | 9     |
| 8  | 827.41  | 414.21 | 809.4   | 405.2  | A   | 802.39  | 401.7  | 785.37  | 393.19 | 784.38  | 392.7  | 8     |
| 9  | 942.44  | 471.72 | 924.43  | 462.72 | D   | 731.36  | 366.18 | 714.33  | 357.67 | 713.35  | 357.18 | 7     |
| 10 | 1039.49 | 520.25 | 1021.48 | 511.24 | P   | 616.33  | 308.67 | 599.3   | 300.16 | 598.32  | 299.66 | 6     |
| 11 | 1110.53 | 555.77 | 1092.51 | 546.76 | A   | 519.28  | 260.14 | 502.25  | 251.63 | 501.27  | 251.14 | 5     |
| 12 | 1197.56 | 599.28 | 1179.55 | 590.28 | S   | 448.24  | 224.62 | 431.21  | 216.11 | 430.23  | 215.62 | 4     |
| 13 | 1296.63 | 648.82 | 1278.62 | 639.81 | V   | 361.21  | 181.11 | 344.18  | 172.59 | 343.2   | 172.1  | 3     |
| 14 | 1411.65 | 706.33 | 1393.64 | 697.32 | D   | 262.14  | 131.57 | 245.11  | 123.06 | 244.13  | 122.57 | 2     |
| 15 |         |        |         |        | K   | 147.11  | 74.06  | 130.09  | 65.55  |         |        | 1     |

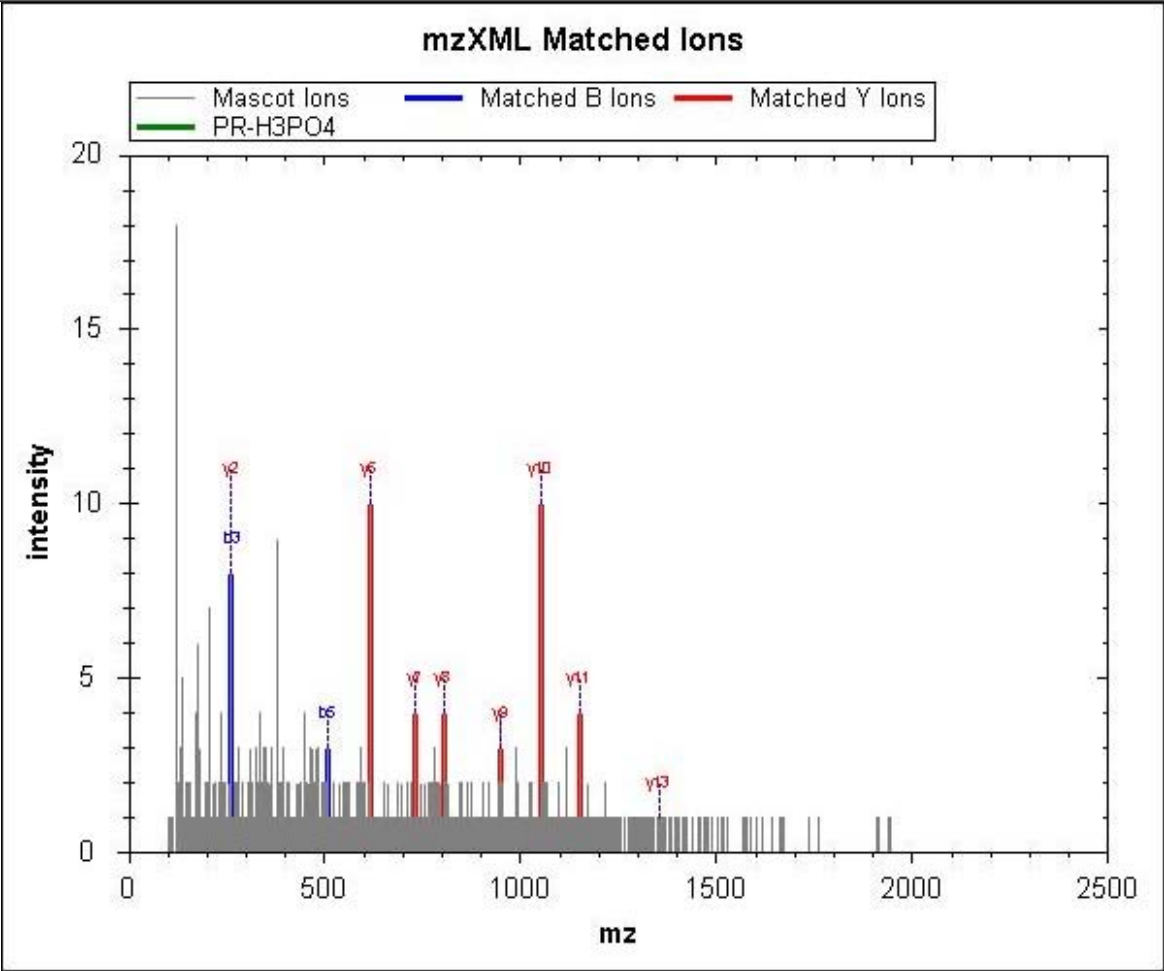

Protein index=882, ACC No: IPI00018260

Peptide index=5745 MS/MS spectrum

Sequence: VGSHPEGGASWLSTAANFLSR, m/z: 715.3552, charge: + 3, Modification: , Mod Position:

Score: 60.73, Raw data: WET\_B4\_090616\_01.mzxml, MS/MS Elution time: 77.579, Scan number: 4305, Mass delta: 0.0133, Rank: 1

| No | b       | b++    | b*      | b*++   | b0      | b0++   | Seq | y       | y++    | y*      | y*++    | y0      | y0++    | RevNo |
|----|---------|--------|---------|--------|---------|--------|-----|---------|--------|---------|---------|---------|---------|-------|
| 1  | 100.08  | 50.54  |         |        |         |        | V   |         |        |         |         |         |         | 21    |
| 2  | 157.1   | 79.05  |         |        |         |        | G   | 2044.98 | 1023   | 2027.96 | 1014.48 | 2026.97 | 1013.99 | 20    |
| 3  | 244.13  | 122.57 |         |        | 226.12  | 113.56 | S   | 1987.96 | 994.48 | 1970.94 | 985.97  | 1969.95 | 985.48  | 19    |
| 4  | 381.19  | 191.1  |         |        | 363.18  | 182.09 | H   | 1900.93 | 950.97 | 1883.9  | 942.46  | 1882.92 | 941.96  | 18    |
| 5  | 478.24  | 239.62 |         |        | 460.23  | 230.62 | P   | 1763.87 | 882.44 | 1746.84 | 873.93  | 1745.86 | 873.43  | 17    |
| 6  | 607.28  | 304.15 |         |        | 589.27  | 295.14 | E   | 1666.82 | 833.91 | 1649.79 | 825.4   | 1648.81 | 824.91  | 16    |
| 7  | 664.3   | 332.66 |         |        | 646.29  | 323.65 | G   | 1537.78 | 769.39 | 1520.75 | 760.88  | 1519.77 | 760.39  | 15    |
| 8  | 721.33  | 361.17 |         |        | 703.32  | 352.16 | G   | 1480.75 | 740.88 | 1463.73 | 732.37  | 1462.74 | 731.88  | 14    |
| 9  | 792.36  | 396.69 |         |        | 774.35  | 387.68 | A   | 1423.73 | 712.37 | 1406.71 | 703.86  | 1405.72 | 703.36  | 13    |
| 10 | 879.4   | 440.2  |         |        | 861.39  | 431.2  | S   | 1352.7  | 676.85 | 1335.67 | 668.34  | 1334.69 | 667.85  | 12    |
| 11 | 1065.47 | 533.24 |         |        | 1047.46 | 524.24 | W   | 1265.66 | 633.34 | 1248.64 | 624.82  | 1247.65 | 624.33  | 11    |
| 12 | 1178.56 | 589.78 |         |        | 1160.55 | 580.78 | L   | 1079.58 | 540.3  | 1062.56 | 531.78  | 1061.57 | 531.29  | 10    |
| 13 | 1265.59 | 633.3  |         |        | 1247.58 | 624.29 | S   | 966.5   | 483.75 | 949.47  | 475.24  | 948.49  | 474.75  | 9     |
| 14 | 1366.64 | 683.82 |         |        | 1348.63 | 674.82 | T   | 879.47  | 440.24 | 862.44  | 431.72  | 861.46  | 431.23  | 8     |
| 15 | 1437.68 | 719.34 |         |        | 1419.67 | 710.34 | A   | 778.42  | 389.71 | 761.39  | 381.2   | 760.41  | 380.71  | 7     |
| 16 | 1508.71 | 754.86 |         |        | 1490.7  | 745.85 | A   | 707.38  | 354.2  | 690.36  | 345.68  | 689.37  | 345.19  | 6     |
| 17 | 1622.76 | 811.88 | 1605.73 | 803.37 | 1604.75 | 802.88 | N   | 636.35  | 318.68 | 619.32  | 310.16  | 618.34  | 309.67  | 5     |
| 18 | 1769.82 | 885.42 | 1752.8  | 876.9  | 1751.81 | 876.41 | F   | 522.3   | 261.66 | 505.28  | 253.14  | 504.29  | 252.65  | 4     |
| 19 | 1882.91 | 941.96 | 1865.88 | 933.44 | 1864.9  | 932.95 | L   | 375.24  | 188.12 | 358.21  | 179.61  | 357.22  | 179.12  | 3     |
| 20 | 1969.94 | 985.47 | 1952.91 | 976.96 | 1951.93 | 976.47 | S   | 262.15  | 131.58 | 245.12  | 123.07  | 244.14  | 122.57  | 2     |
| 21 |         |        |         |        |         |        | R   | 175.12  | 88.06  | 158.09  | 79.55   |         |         | 1     |

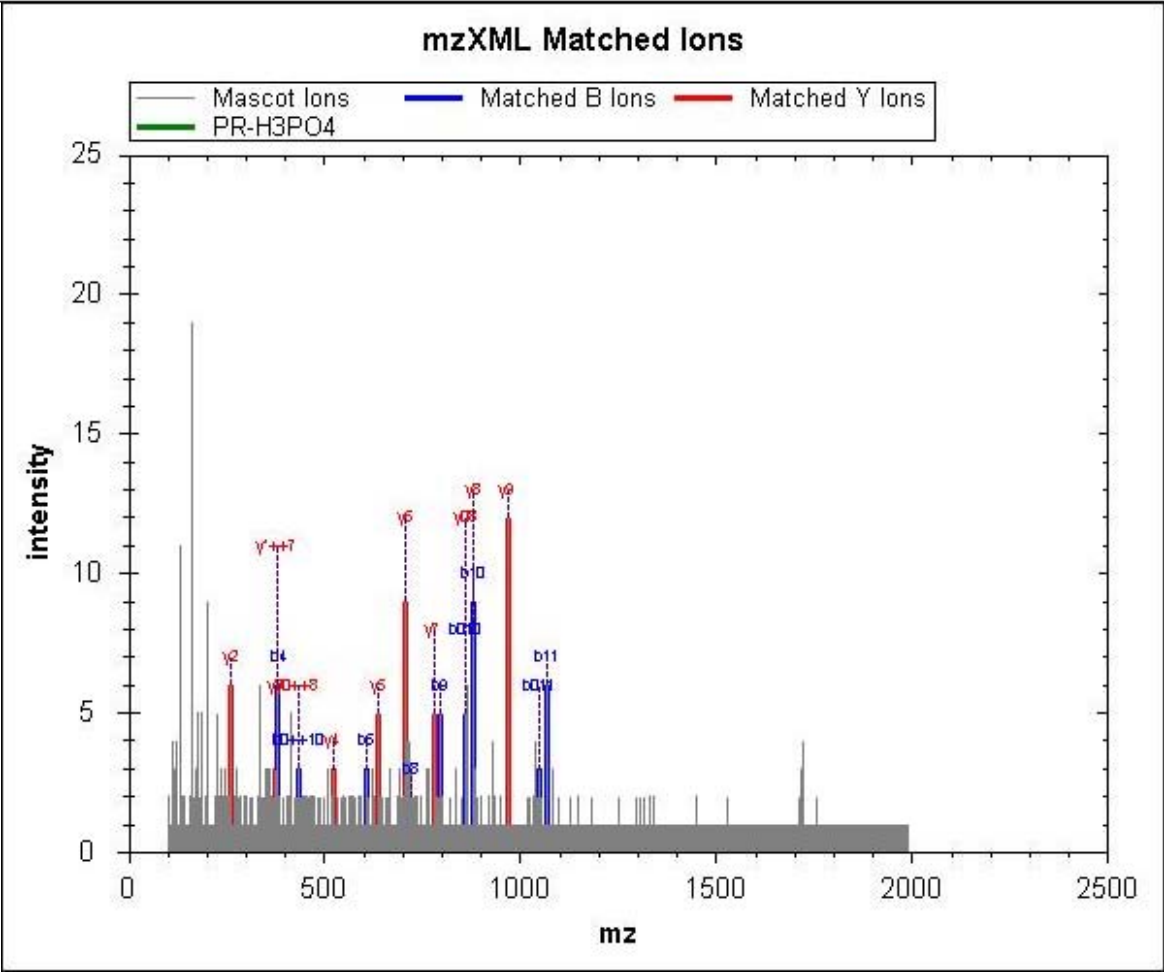

Protein index=883, ACC No:IPI00010896

Peptide index=4711 MS/MS spectrum

Sequence: LAALNPESNTAGLDIFAK, m/z:922.9893, charge:+ 2, Modification: , Mod Position:

Score: 79.5, Raw data:WET\_A4\_090615\_01.mzxml, MS/MS Elution time: 64.9395, Scan number:3550, Mass delta:-0.0038, Rank:1

| No | b       | b++    | b*      | b*++   | b0      | b0++   | Seq | y       | y++    | y*      | y*++   | y0      | y0++   | RevNo |
|----|---------|--------|---------|--------|---------|--------|-----|---------|--------|---------|--------|---------|--------|-------|
| 1  | 114.09  | 57.55  |         |        |         |        | L   |         |        |         |        |         |        | 18    |
| 2  | 185.13  | 93.07  |         |        |         |        | A   | 1731.89 | 866.45 | 1714.86 | 857.94 | 1713.88 | 857.44 | 17    |
| 3  | 256.17  | 128.59 |         |        |         |        | A   | 1660.85 | 830.93 | 1643.83 | 822.42 | 1642.84 | 821.93 | 16    |
| 4  | 369.25  | 185.13 |         |        |         |        | L   | 1589.82 | 795.41 | 1572.79 | 786.9  | 1571.81 | 786.41 | 15    |
| 5  | 483.29  | 242.15 | 466.27  | 233.64 |         |        | N   | 1476.73 | 738.87 | 1459.71 | 730.36 | 1458.72 | 729.86 | 14    |
| 6  | 580.35  | 290.68 | 563.32  | 282.16 |         |        | P   | 1362.69 | 681.85 | 1345.66 | 673.34 | 1344.68 | 672.84 | 13    |
| 7  | 709.39  | 355.2  | 692.36  | 346.68 | 691.38  | 346.19 | E   | 1265.64 | 633.32 | 1248.61 | 624.81 | 1247.63 | 624.32 | 12    |
| 8  | 796.42  | 398.71 | 779.39  | 390.2  | 778.41  | 389.71 | S   | 1136.59 | 568.8  | 1119.57 | 560.29 | 1118.58 | 559.8  | 11    |
| 9  | 910.46  | 455.74 | 893.44  | 447.22 | 892.45  | 446.73 | N   | 1049.56 | 525.28 | 1032.54 | 516.77 | 1031.55 | 516.28 | 10    |
| 10 | 1011.51 | 506.26 | 994.48  | 497.75 | 993.5   | 497.25 | T   | 935.52  | 468.26 | 918.49  | 459.75 | 917.51  | 459.26 | 9     |
| 11 | 1082.55 | 541.78 | 1065.52 | 533.26 | 1064.54 | 532.77 | A   | 834.47  | 417.74 | 817.45  | 409.23 | 816.46  | 408.73 | 8     |
| 12 | 1139.57 | 570.29 | 1122.54 | 561.78 | 1121.56 | 561.28 | G   | 763.43  | 382.22 | 746.41  | 373.71 | 745.42  | 373.22 | 7     |

|    |         |        |         |        |         |        |   |        |        |        |        |        |        |   |
|----|---------|--------|---------|--------|---------|--------|---|--------|--------|--------|--------|--------|--------|---|
| 13 | 1252.65 | 626.83 | 1235.63 | 618.32 | 1234.64 | 617.83 | L | 706.41 | 353.71 | 689.39 | 345.2  | 688.4  | 344.71 | 6 |
| 14 | 1367.68 | 684.34 | 1350.65 | 675.83 | 1349.67 | 675.34 | D | 593.33 | 297.17 | 576.3  | 288.65 | 575.32 | 288.16 | 5 |
| 15 | 1480.76 | 740.89 | 1463.74 | 732.37 | 1462.75 | 731.88 | I | 478.3  | 239.65 | 461.28 | 231.14 |        |        | 4 |
| 16 | 1627.83 | 814.42 | 1610.81 | 805.91 | 1609.82 | 805.41 | F | 365.22 | 183.11 | 348.19 | 174.6  |        |        | 3 |
| 17 | 1698.87 | 849.94 | 1681.84 | 841.43 | 1680.86 | 840.93 | A | 218.15 | 109.58 | 201.12 | 101.07 |        |        | 2 |
| 18 |         |        |         |        |         |        | K | 147.11 | 74.06  | 130.09 | 65.55  |        |        | 1 |

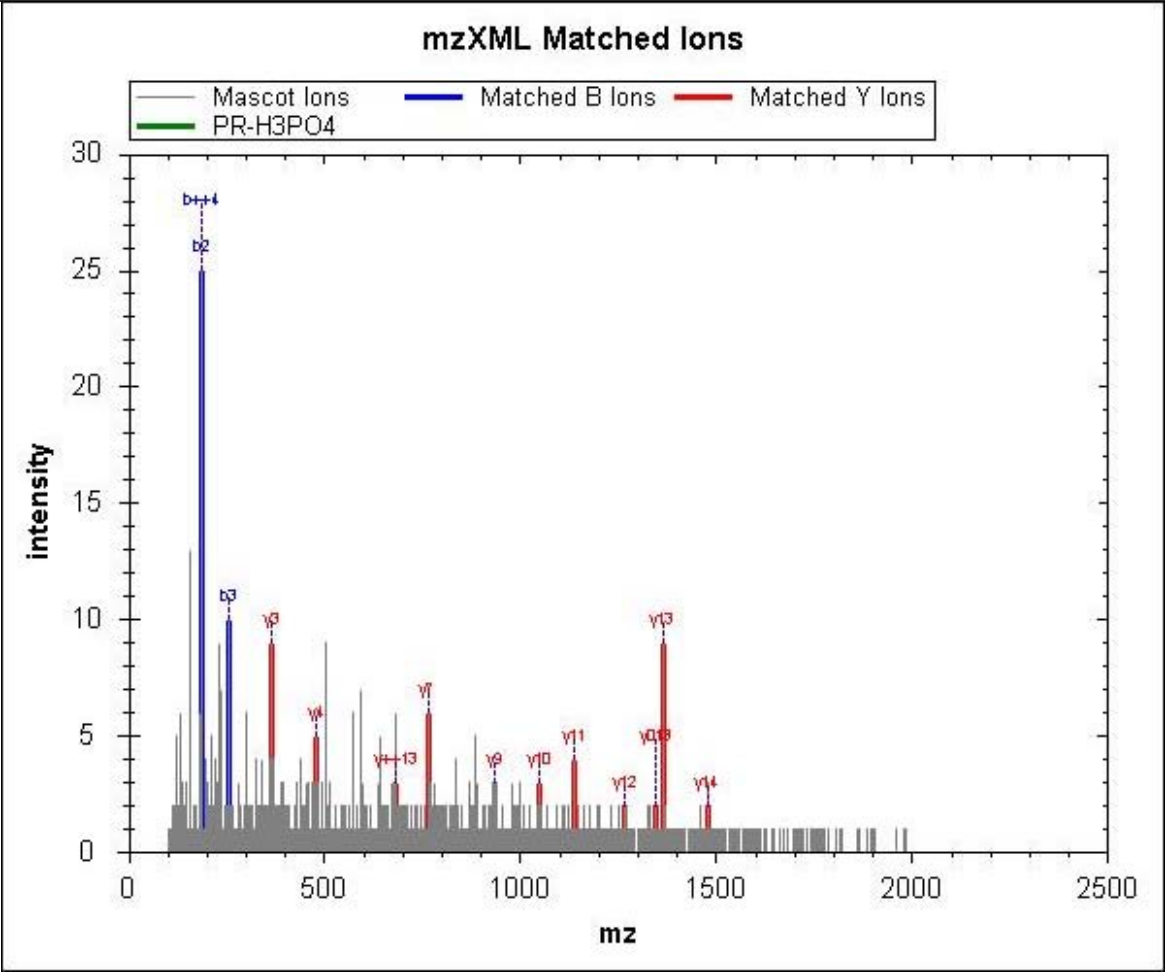

Protein index=889, ACC No:IPI00472510

Peptide index=5768 MS/MS spectrum

Sequence: FDPQFALTNI AVLK, m/z:788.9328, charge:+ 2, Modification: , Mod Position:

Score: 78.76, Raw data:WET\_A4\_090615\_03.mzxml, MS/MS Elution time: 77.9865, Scan number:4300, Mass delta:0.0004, Rank:1

| No | b      | b++    | b*     | b*++   | b0     | b0++   | Seq | y       | y++    | y*      | y*++   | y0      | y0++   | RevNo |
|----|--------|--------|--------|--------|--------|--------|-----|---------|--------|---------|--------|---------|--------|-------|
| 1  | 148.08 | 74.54  |        |        |        |        | F   |         |        |         |        |         |        | 14    |
| 2  | 263.1  | 132.05 |        |        | 245.09 | 123.05 | D   | 1429.8  | 715.41 | 1412.78 | 706.89 | 1411.79 | 706.4  | 13    |
| 3  | 360.16 | 180.58 |        |        | 342.14 | 171.58 | P   | 1314.78 | 657.89 | 1297.75 | 649.38 | 1296.77 | 648.89 | 12    |
| 4  | 488.21 | 244.61 | 471.19 | 236.1  | 470.2  | 235.61 | Q   | 1217.73 | 609.37 | 1200.7  | 600.85 | 1199.71 | 600.36 | 11    |
| 5  | 635.28 | 318.14 | 618.26 | 309.63 | 617.27 | 309.14 | F   | 1089.67 | 545.34 | 1072.64 | 536.82 | 1071.66 | 536.33 | 10    |
| 6  | 706.32 | 353.66 | 689.29 | 345.15 | 688.31 | 344.66 | A   | 942.6   | 471.8  | 925.57  | 463.29 | 924.59  | 462.8  | 9     |



|    |         |        |         |        |         |        |   |        |        |        |        |        |        |   |
|----|---------|--------|---------|--------|---------|--------|---|--------|--------|--------|--------|--------|--------|---|
| 5  | 583.32  | 292.16 | 566.29  | 283.65 |         |        | Q | 788.39 | 394.7  | 771.36 | 386.19 | 770.38 | 385.69 | 6 |
| 6  | 712.36  | 356.68 | 695.34  | 348.17 | 694.35  | 347.68 | E | 660.33 | 330.67 | 643.3  | 322.16 | 642.32 | 321.66 | 5 |
| 7  | 826.41  | 413.71 | 809.38  | 405.19 | 808.39  | 404.7  | N | 531.29 | 266.15 | 514.26 | 257.63 | 513.28 | 257.14 | 4 |
| 8  | 955.45  | 478.23 | 938.42  | 469.71 | 937.44  | 469.22 | E | 417.25 | 209.13 | 400.22 | 200.61 | 399.24 | 200.12 | 3 |
| 9  | 1068.53 | 534.77 | 1051.51 | 526.26 | 1050.52 | 525.76 | I | 288.2  | 144.61 | 271.18 | 136.09 |        |        | 2 |
| 10 |         |        |         |        |         |        | R | 175.12 | 88.06  | 158.09 | 79.55  |        |        | 1 |

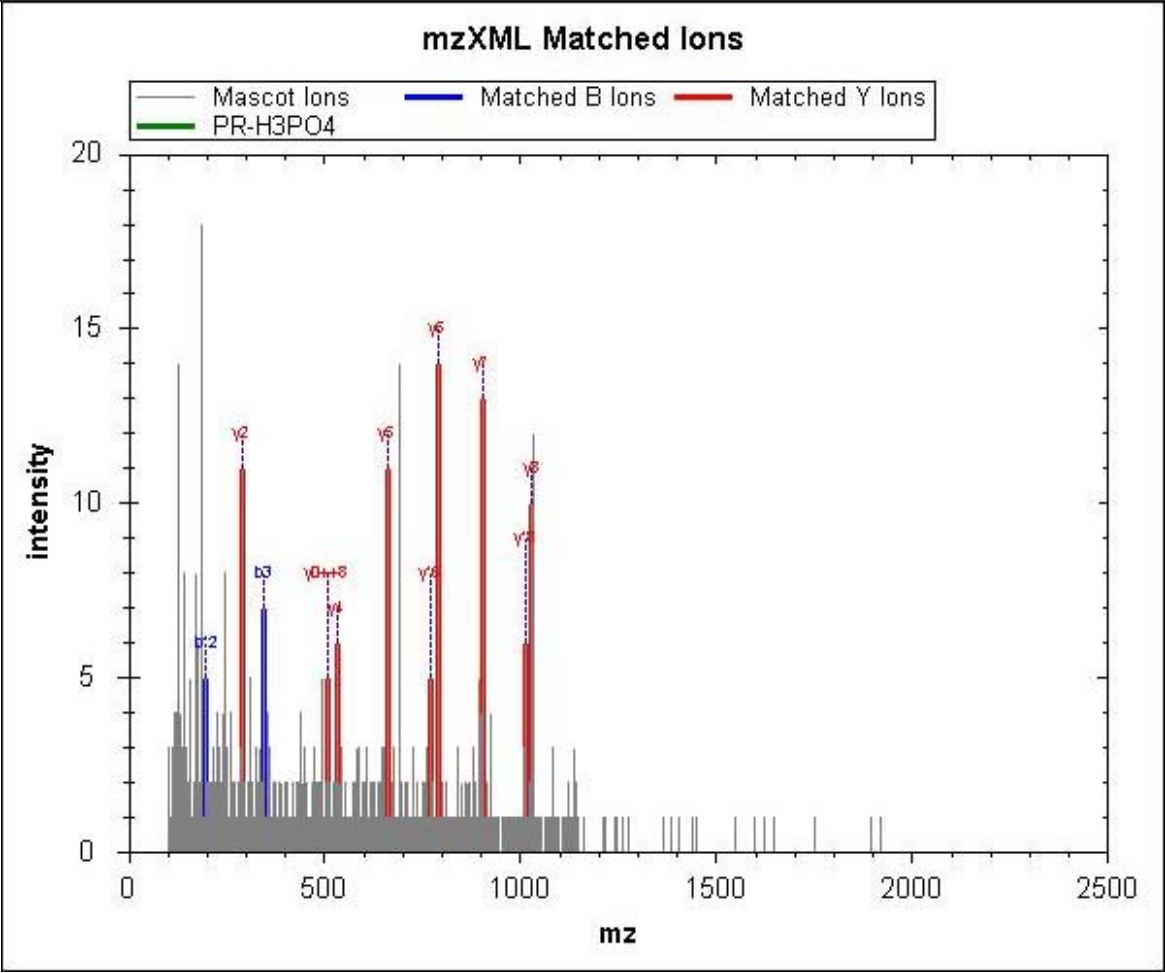

Protein index=898, ACC No:IPI00008732

Peptide index=1345 MS/MS spectrum

Sequence: TVTQLVAEDGSR, m/z:638.3261, charge:+ 2, Modification: , Mod Position:

Score: 91.25, Raw data:WET\_A4\_090615\_03.mzxml, MS/MS Elution time: 32.17883, Scan number:1640, Mass delta:-0.0022, Rank:1

| No | b      | b++    | b*     | b*++   | b0     | b0++   | Seq | y       | y++    | y*      | y*++   | y0      | y0++   | RevNo |
|----|--------|--------|--------|--------|--------|--------|-----|---------|--------|---------|--------|---------|--------|-------|
| 1  | 102.05 | 51.53  |        |        | 84.04  | 42.53  | T   |         |        |         |        |         |        | 12    |
| 2  | 201.12 | 101.07 |        |        | 183.11 | 92.06  | V   | 1174.61 | 587.81 | 1157.58 | 579.29 | 1156.6  | 578.8  | 11    |
| 3  | 302.17 | 151.59 |        |        | 284.16 | 142.58 | T   | 1075.54 | 538.27 | 1058.51 | 529.76 | 1057.53 | 529.27 | 10    |
| 4  | 430.23 | 215.62 | 413.2  | 207.11 | 412.22 | 206.61 | Q   | 974.49  | 487.75 | 957.46  | 479.24 | 956.48  | 478.74 | 9     |
| 5  | 543.31 | 272.16 | 526.29 | 263.65 | 525.3  | 263.16 | L   | 846.43  | 423.72 | 829.4   | 415.21 | 828.42  | 414.71 | 8     |
| 6  | 642.38 | 321.69 | 625.36 | 313.18 | 624.37 | 312.69 | V   | 733.35  | 367.18 | 716.32  | 358.66 | 715.34  | 358.17 | 7     |

|    |         |        |         |        |         |        |   |        |        |        |        |        |        |   |
|----|---------|--------|---------|--------|---------|--------|---|--------|--------|--------|--------|--------|--------|---|
| 7  | 713.42  | 357.21 | 696.39  | 348.7  | 695.41  | 348.21 | A | 634.28 | 317.64 | 617.25 | 309.13 | 616.27 | 308.64 | 6 |
| 8  | 842.46  | 421.73 | 825.44  | 413.22 | 824.45  | 412.73 | E | 563.24 | 282.12 | 546.22 | 273.61 | 545.23 | 273.12 | 5 |
| 9  | 957.49  | 479.25 | 940.46  | 470.73 | 939.48  | 470.24 | D | 434.2  | 217.6  | 417.17 | 209.09 | 416.19 | 208.6  | 4 |
| 10 | 1014.51 | 507.76 | 997.48  | 499.25 | 996.5   | 498.75 | G | 319.17 | 160.09 | 302.15 | 151.58 | 301.16 | 151.08 | 3 |
| 11 | 1101.54 | 551.27 | 1084.52 | 542.76 | 1083.53 | 542.27 | S | 262.15 | 131.58 | 245.12 | 123.07 | 244.14 | 122.57 | 2 |
| 12 |         |        |         |        |         |        | R | 175.12 | 88.06  | 158.09 | 79.55  |        |        | 1 |

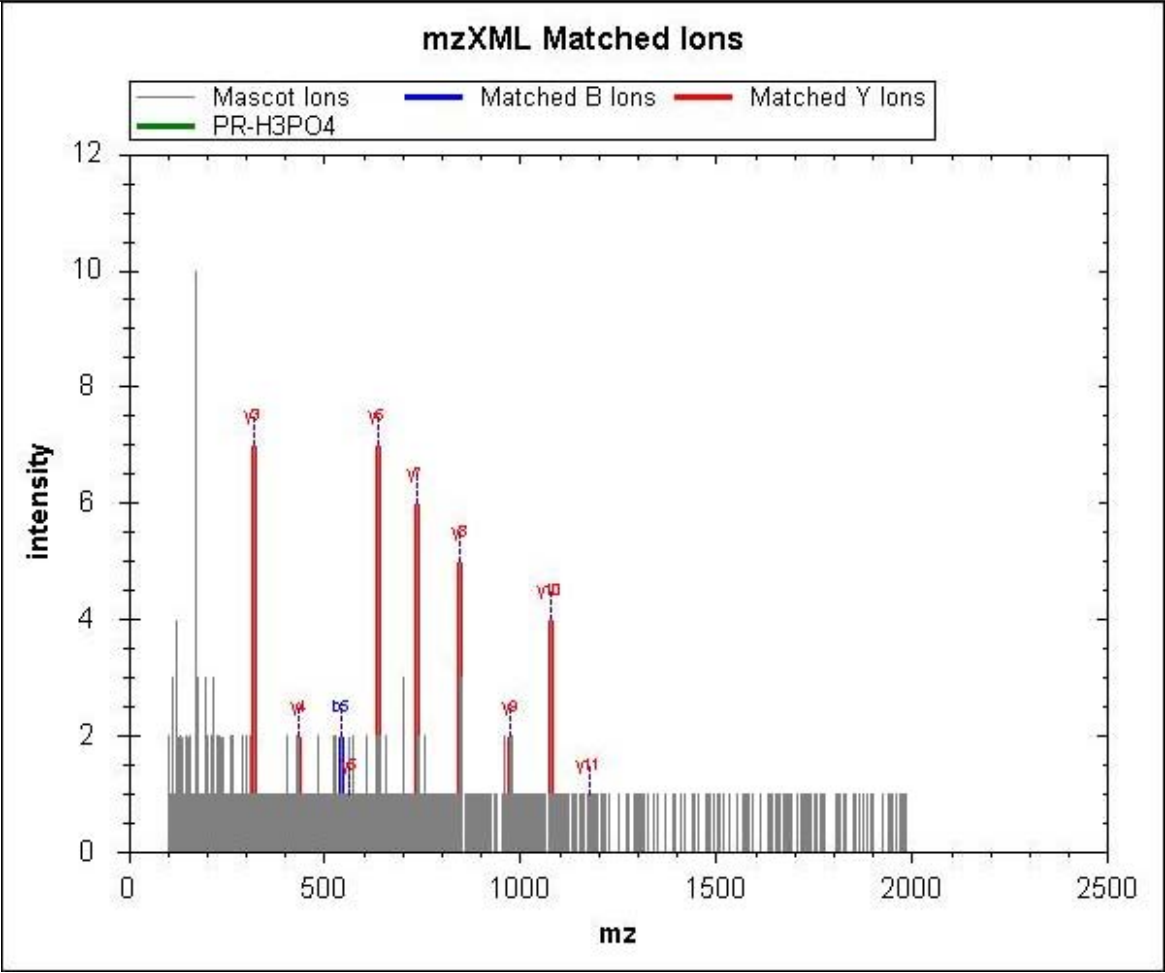

Protein index=905, ACC No:IPI00300990

Peptide index=1888 MS/MS spectrum

Sequence: EQLDNQLDAYMSK, m/z:785.8579, charge:+ 2, Modification: Oxidation (M), Mod Position: 0.0000000000100.0

Score: 77.39, Raw data:WET\_A4\_090615\_01.mzxml, MS/MS Elution time: 38.7, Scan number:2026, Mass delta:0.0033, Rank:1

| No | b      | b++    | b*     | b*++   | b0     | b0++   | Seq | y       | y++    | y*      | y*++   | y0      | y0++   | RevNo |
|----|--------|--------|--------|--------|--------|--------|-----|---------|--------|---------|--------|---------|--------|-------|
| 1  | 130.05 | 65.53  |        |        | 112.04 | 56.52  | E   |         |        |         |        |         |        | 13    |
| 2  | 258.11 | 129.56 | 241.08 | 121.04 | 240.1  | 120.55 | Q   | 1441.66 | 721.34 | 1424.64 | 712.82 | 1423.65 | 712.33 | 12    |
| 3  | 371.19 | 186.1  | 354.17 | 177.59 | 353.18 | 177.09 | L   | 1313.6  | 657.31 | 1296.58 | 648.79 | 1295.59 | 648.3  | 11    |
| 4  | 486.22 | 243.61 | 469.19 | 235.1  | 468.21 | 234.61 | D   | 1200.52 | 600.76 | 1183.49 | 592.25 | 1182.51 | 591.76 | 10    |
| 5  | 600.26 | 300.63 | 583.24 | 292.12 | 582.25 | 291.63 | N   | 1085.49 | 543.25 | 1068.47 | 534.74 | 1067.48 | 534.24 | 9     |



|    |         |         |         |         |         |         |   |         |         |         |         |         |         |    |
|----|---------|---------|---------|---------|---------|---------|---|---------|---------|---------|---------|---------|---------|----|
| 5  | 486.18  | 243.6   |         |         | 468.17  | 234.59  | S | 2200.18 | 1100.59 | 2183.15 | 1092.08 | 2182.17 | 1091.59 | 20 |
| 6  | 583.24  | 292.12  |         |         | 565.23  | 283.12  | P | 2113.14 | 1057.08 | 2096.12 | 1048.56 | 2095.13 | 1048.07 | 19 |
| 7  | 739.34  | 370.17  | 722.31  | 361.66  | 721.33  | 361.17  | R | 2016.09 | 1008.55 | 1999.06 | 1000.04 | 1998.08 | 999.54  | 18 |
| 8  | 836.39  | 418.7   | 819.36  | 410.19  | 818.38  | 409.69  | P | 1859.99 | 930.5   | 1842.96 | 921.99  | 1841.98 | 921.49  | 17 |
| 9  | 933.44  | 467.22  | 916.42  | 458.71  | 915.43  | 458.22  | P | 1762.94 | 881.97  | 1745.91 | 873.46  | 1744.93 | 872.97  | 16 |
| 10 | 1004.48 | 502.74  | 987.45  | 494.23  | 986.47  | 493.74  | A | 1665.88 | 833.45  | 1648.86 | 824.93  | 1647.87 | 824.44  | 15 |
| 11 | 1117.56 | 559.29  | 1100.54 | 550.77  | 1099.55 | 550.28  | L | 1594.85 | 797.93  | 1577.82 | 789.41  | 1576.84 | 788.92  | 14 |
| 12 | 1232.59 | 616.8   | 1215.56 | 608.29  | 1214.58 | 607.79  | D | 1481.76 | 741.39  | 1464.74 | 732.87  | 1463.75 | 732.38  | 13 |
| 13 | 1347.62 | 674.31  | 1330.59 | 665.8   | 1329.61 | 665.31  | D | 1366.74 | 683.87  | 1349.71 | 675.36  | 1348.73 | 674.87  | 12 |
| 14 | 1418.65 | 709.83  | 1401.63 | 701.32  | 1400.64 | 700.83  | A | 1251.71 | 626.36  | 1234.68 | 617.85  | 1233.7  | 617.35  | 11 |
| 15 | 1565.72 | 783.37  | 1548.7  | 774.85  | 1547.71 | 774.36  | F | 1180.67 | 590.84  | 1163.65 | 582.33  | 1162.66 | 581.83  | 10 |
| 16 | 1652.76 | 826.88  | 1635.73 | 818.37  | 1634.74 | 817.88  | S | 1033.6  | 517.31  | 1016.58 | 508.79  | 1015.59 | 508.3   | 9  |
| 17 | 1765.84 | 883.42  | 1748.81 | 874.91  | 1747.83 | 874.42  | I | 946.57  | 473.79  | 929.55  | 465.28  | 928.56  | 464.78  | 8  |
| 18 | 1878.92 | 939.97  | 1861.9  | 931.45  | 1860.91 | 930.96  | L | 833.49  | 417.25  | 816.46  | 408.73  | 815.48  | 408.24  | 7  |
| 19 | 1993.95 | 997.48  | 1976.92 | 988.97  | 1975.94 | 988.47  | D | 720.4   | 360.71  | 703.38  | 352.19  | 702.39  | 351.7   | 6  |
| 20 | 2107.03 | 1054.02 | 2090.01 | 1045.51 | 2089.02 | 1045.02 | L | 605.38  | 303.19  | 588.35  | 294.68  |         |         | 5  |
| 21 | 2254.1  | 1127.56 | 2237.08 | 1119.04 | 2236.09 | 1118.55 | F | 492.29  | 246.65  | 475.27  | 238.14  |         |         | 4  |
| 22 | 2367.19 | 1184.1  | 2350.16 | 1175.58 | 2349.18 | 1175.09 | L | 345.22  | 173.12  | 328.2   | 164.6   |         |         | 3  |
| 23 | 2424.21 | 1212.61 | 2407.18 | 1204.09 | 2406.2  | 1203.6  | G | 232.14  | 116.57  | 215.11  | 108.06  |         |         | 2  |
| 24 |         |         |         |         |         |         | R | 175.12  | 88.06   | 158.09  | 79.55   |         |         | 1  |

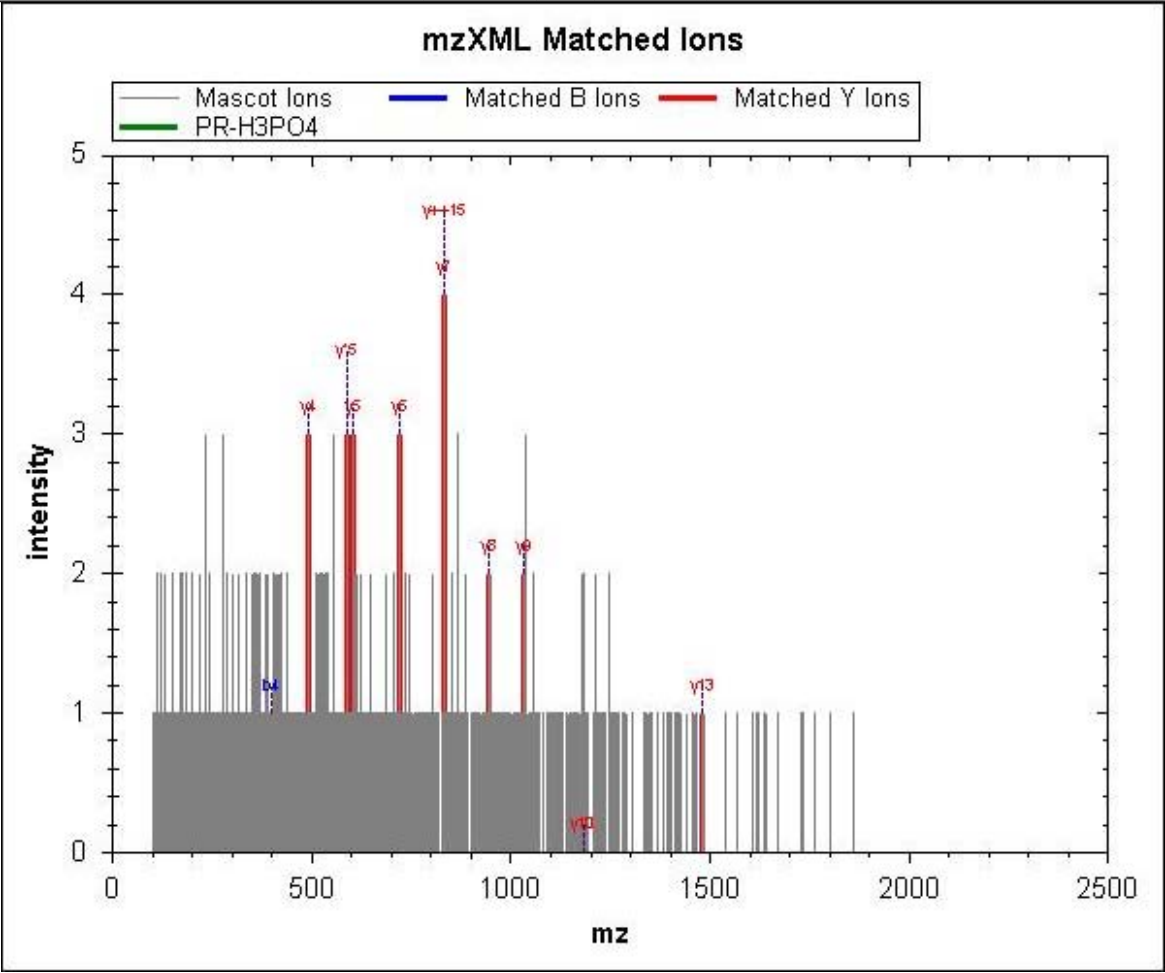

Protein index=914, ACC No: IPI00030154

Peptide index=6434 MS/MS spectrum

Sequence: NAYAVLYDIILK, m/z:698.3966, charge:+ 2, Modification: , Mod Position:

Score: 58.91, Raw data:WET\_B5\_090616\_01.mzxml, MS/MS Elution time: 88.1295, Scan number:4892, Mass delta:0.0031, Rank:1

| No | b       | b++    | b*      | b*++   | b0      | b0++   | Seq | y       | y++    | y*      | y*++   | y0      | y0++   | RevNo |
|----|---------|--------|---------|--------|---------|--------|-----|---------|--------|---------|--------|---------|--------|-------|
| 1  | 115.05  | 58.03  | 98.02   | 49.52  |         |        | N   |         |        |         |        |         |        | 12    |
| 2  | 186.09  | 93.55  | 169.06  | 85.03  |         |        | A   | 1281.75 | 641.38 | 1264.72 | 632.86 | 1263.73 | 632.37 | 11    |
| 3  | 349.15  | 175.08 | 332.12  | 166.57 |         |        | Y   | 1210.71 | 605.86 | 1193.68 | 597.34 | 1192.7  | 596.85 | 10    |
| 4  | 420.19  | 210.6  | 403.16  | 202.08 |         |        | A   | 1047.64 | 524.33 | 1030.62 | 515.81 | 1029.63 | 515.32 | 9     |
| 5  | 519.26  | 260.13 | 502.23  | 251.62 |         |        | V   | 976.61  | 488.81 | 959.58  | 480.29 | 958.6   | 479.8  | 8     |
| 6  | 632.34  | 316.67 | 615.31  | 308.16 |         |        | L   | 877.54  | 439.27 | 860.51  | 430.76 | 859.53  | 430.27 | 7     |
| 7  | 795.4   | 398.21 | 778.38  | 389.69 |         |        | Y   | 764.46  | 382.73 | 747.43  | 374.22 | 746.44  | 373.73 | 6     |
| 8  | 910.43  | 455.72 | 893.4   | 447.21 | 892.42  | 446.71 | D   | 601.39  | 301.2  | 584.37  | 292.69 | 583.38  | 292.19 | 5     |
| 9  | 1023.51 | 512.26 | 1006.49 | 503.75 | 1005.5  | 503.26 | I   | 486.36  | 243.69 | 469.34  | 235.17 |         |        | 4     |
| 10 | 1136.6  | 568.8  | 1119.57 | 560.29 | 1118.59 | 559.8  | I   | 373.28  | 187.14 | 356.25  | 178.63 |         |        | 3     |
| 11 | 1249.68 | 625.35 | 1232.66 | 616.83 | 1231.67 | 616.34 | L   | 260.2   | 130.6  | 243.17  | 122.09 |         |        | 2     |
| 12 |         |        |         |        |         |        | K   | 147.11  | 74.06  | 130.09  | 65.55  |         |        | 1     |

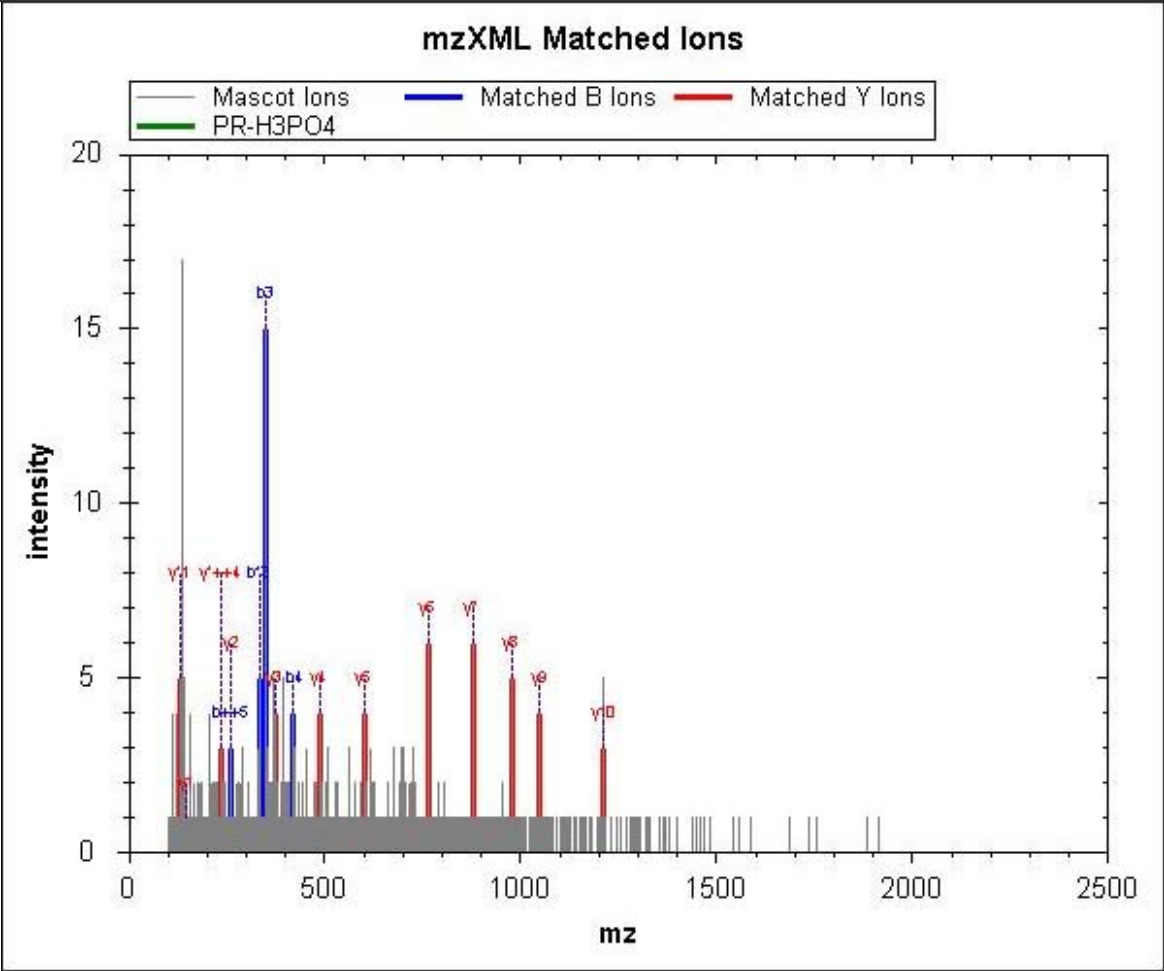

Protein index=916, ACC No:IP100026185

Peptide index=883 MS/MS spectrum

Sequence: SGSGTMNLGGSLTR, m/z:677.3267, charge:+ 2, Modification: Oxidation (M), Mod Position: 0.00000100000000.0

Score: 84.52, Raw data:WET\_A4\_090615\_01.mzxml, MS/MS Elution time: 26.517, Scan number:1318, Mass delta:0.0034, Rank:1

| No | b       | b++    | b*      | b*++   | b0      | b0++   | Seq | y       | y++    | y*      | y*++   | y0      | y0++   | RevNo |
|----|---------|--------|---------|--------|---------|--------|-----|---------|--------|---------|--------|---------|--------|-------|
| 1  | 88.04   | 44.52  |         |        | 70.03   | 35.52  | S   |         |        |         |        |         |        | 14    |
| 2  | 145.06  | 73.03  |         |        | 127.05  | 64.03  | G   | 1202.61 | 601.81 | 1185.59 | 593.3  | 1184.6  | 592.8  | 13    |
| 3  | 232.09  | 116.55 |         |        | 214.08  | 107.54 | S   | 1145.59 | 573.3  | 1128.56 | 564.79 | 1127.58 | 564.29 | 12    |
| 4  | 289.11  | 145.06 |         |        | 271.1   | 136.06 | G   | 1058.56 | 529.78 | 1041.53 | 521.27 | 1040.55 | 520.78 | 11    |
| 5  | 390.16  | 195.58 |         |        | 372.15  | 186.58 | T   | 1001.54 | 501.27 | 984.51  | 492.76 | 983.53  | 492.27 | 10    |
| 6  | 473.2   | 237.1  |         |        | 455.19  | 228.1  | M   | 900.49  | 450.75 | 883.46  | 442.24 | 882.48  | 441.74 | 9     |
| 7  | 587.24  | 294.12 | 570.22  | 285.61 | 569.23  | 285.12 | N   | 817.45  | 409.23 | 800.43  | 400.72 | 799.44  | 400.22 | 8     |
| 8  | 700.33  | 350.67 | 683.3   | 342.15 | 682.32  | 341.66 | L   | 703.41  | 352.21 | 686.38  | 343.7  | 685.4   | 343.2  | 7     |
| 9  | 757.35  | 379.18 | 740.32  | 370.66 | 739.34  | 370.17 | G   | 590.33  | 295.67 | 573.3   | 287.15 | 572.32  | 286.66 | 6     |
| 10 | 814.37  | 407.69 | 797.34  | 399.17 | 796.36  | 398.68 | G   | 533.3   | 267.16 | 516.28  | 258.64 | 515.29  | 258.15 | 5     |
| 11 | 901.4   | 451.2  | 884.37  | 442.69 | 883.39  | 442.2  | S   | 476.28  | 238.65 | 459.26  | 230.13 | 458.27  | 229.64 | 4     |
| 12 | 1014.49 | 507.75 | 997.46  | 499.23 | 996.47  | 498.74 | L   | 389.25  | 195.13 | 372.22  | 186.62 | 371.24  | 186.12 | 3     |
| 13 | 1115.53 | 558.27 | 1098.51 | 549.76 | 1097.52 | 549.26 | T   | 276.17  | 138.59 | 259.14  | 130.07 | 258.16  | 129.58 | 2     |
| 14 |         |        |         |        |         |        | R   | 175.12  | 88.06  | 158.09  | 79.55  |         |        | 1     |

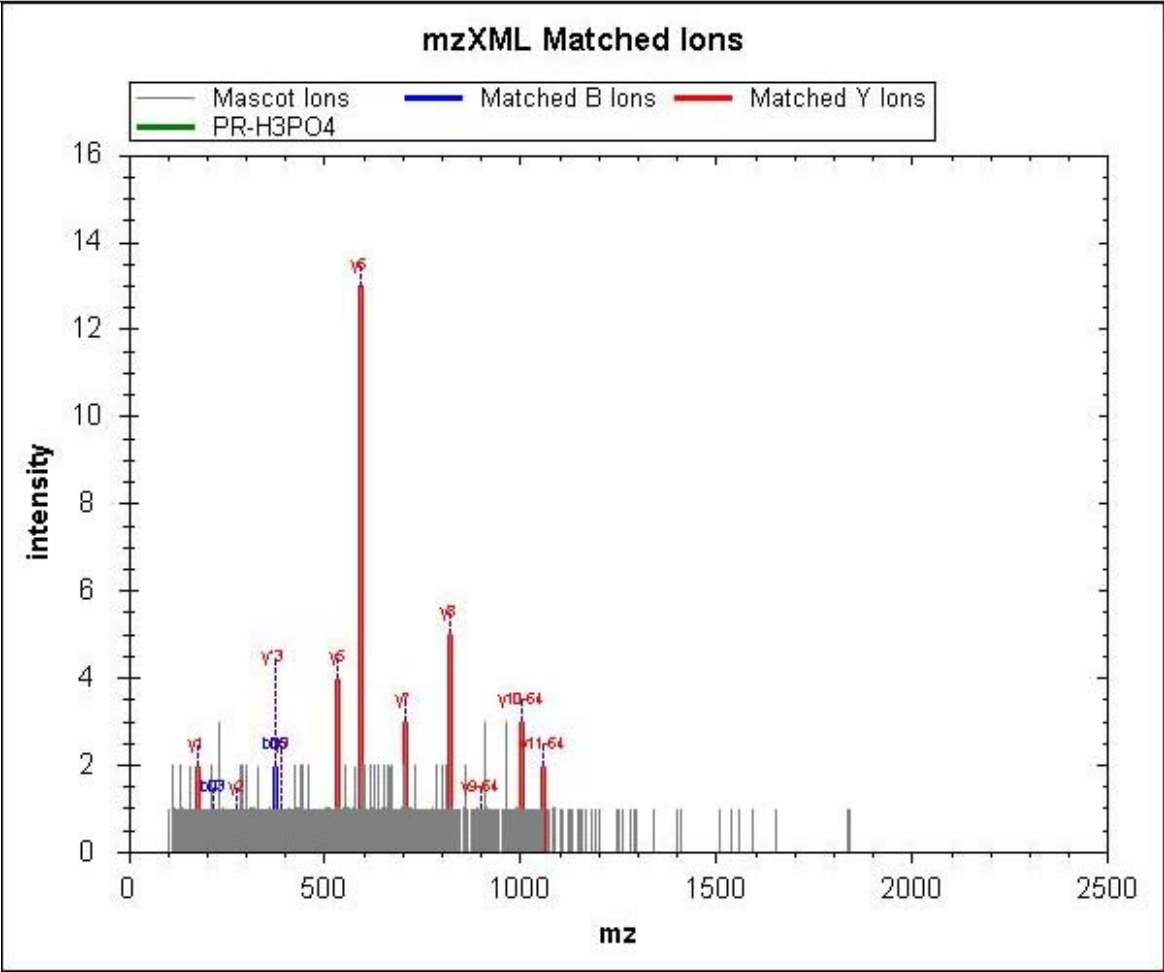

Protein index=919, ACC No:IPI00788813

Peptide index=3656 MS/MS spectrum

Sequence: RDSPEDFVYQFK, m/z:765.8637, charge:+ 2, Modification: , Mod Position:

Score: 74.59, Raw data:WET\_B5\_090616\_01.mzxml, MS/MS Elution time: 54.55333, Scan number:2942, Mass delta:-0.0119, Rank:1

| No | b       | b++    | b*      | b*++   | b0      | b0++   | Seq | y       | y++    | y*      | y*++   | y0      | y0++   | RevNo |
|----|---------|--------|---------|--------|---------|--------|-----|---------|--------|---------|--------|---------|--------|-------|
| 1  | 157.11  | 79.06  | 140.08  | 70.54  |         |        | R   |         |        |         |        |         |        | 12    |
| 2  | 272.14  | 136.57 | 255.11  | 128.06 | 254.12  | 127.57 | D   | 1374.62 | 687.81 | 1357.59 | 679.3  | 1356.61 | 678.81 | 11    |
| 3  | 359.17  | 180.09 | 342.14  | 171.57 | 341.16  | 171.08 | S   | 1259.59 | 630.3  | 1242.57 | 621.79 | 1241.58 | 621.3  | 10    |
| 4  | 456.22  | 228.61 | 439.19  | 220.1  | 438.21  | 219.61 | P   | 1172.56 | 586.78 | 1155.54 | 578.27 | 1154.55 | 577.78 | 9     |
| 5  | 585.26  | 293.13 | 568.24  | 284.62 | 567.25  | 284.13 | E   | 1075.51 | 538.26 | 1058.48 | 529.75 | 1057.5  | 529.25 | 8     |
| 6  | 700.29  | 350.65 | 683.26  | 342.14 | 682.28  | 341.64 | D   | 946.47  | 473.74 | 929.44  | 465.22 | 928.46  | 464.73 | 7     |
| 7  | 847.36  | 424.18 | 830.33  | 415.67 | 829.35  | 415.18 | F   | 831.44  | 416.22 | 814.41  | 407.71 |         |        | 6     |
| 8  | 946.43  | 473.72 | 929.4   | 465.2  | 928.42  | 464.71 | V   | 684.37  | 342.69 | 667.34  | 334.18 |         |        | 5     |
| 9  | 1109.49 | 555.25 | 1092.46 | 546.74 | 1091.48 | 546.24 | Y   | 585.3   | 293.16 | 568.28  | 284.64 |         |        | 4     |
| 10 | 1237.55 | 619.28 | 1220.52 | 610.76 | 1219.54 | 610.27 | Q   | 422.24  | 211.62 | 405.21  | 203.11 |         |        | 3     |
| 11 | 1384.62 | 692.81 | 1367.59 | 684.3  | 1366.61 | 683.81 | F   | 294.18  | 147.59 | 277.15  | 139.08 |         |        | 2     |
| 12 |         |        |         |        |         |        | K   | 147.11  | 74.06  | 130.09  | 65.55  |         |        | 1     |

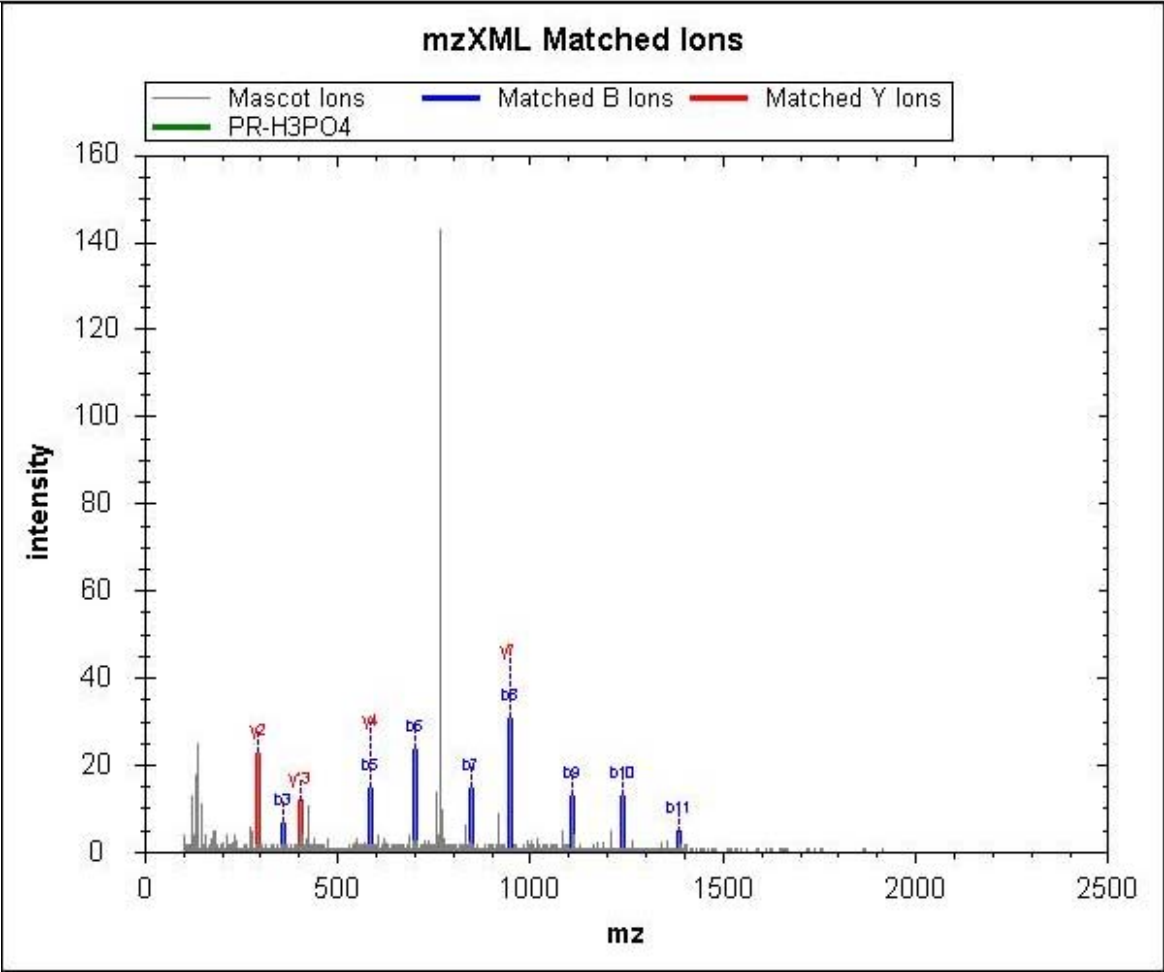

Protein index=920, ACC No:IPI00011916

Peptide index=5936 MS/MS spectrum

Sequence: FLFSLFGQK, m/z:543.8035, charge:+ 2, Modification: , Mod Position:

Score: 44.43, Raw data:WET\_A4\_090615\_01.mzxml, MS/MS Elution time: 80.11067, Scan number:4431, Mass delta:0.0014, Rank:1

| No | b      | b++    | b*     | b*++   | b0     | b0++   | Seq | y      | y++    | y*     | y*++   | y0     | y0++   | RevNo |
|----|--------|--------|--------|--------|--------|--------|-----|--------|--------|--------|--------|--------|--------|-------|
| 1  | 148.08 | 74.54  |        |        |        |        | F   |        |        |        |        |        |        | 9     |
| 2  | 261.16 | 131.08 |        |        |        |        | L   | 939.53 | 470.27 | 922.5  | 461.76 | 921.52 | 461.26 | 8     |
| 3  | 408.23 | 204.62 |        |        |        |        | F   | 826.45 | 413.73 | 809.42 | 405.21 | 808.44 | 404.72 | 7     |
| 4  | 495.26 | 248.13 |        |        | 477.25 | 239.13 | S   | 679.38 | 340.19 | 662.35 | 331.68 | 661.37 | 331.19 | 6     |
| 5  | 608.34 | 304.68 |        |        | 590.33 | 295.67 | L   | 592.35 | 296.68 | 575.32 | 288.16 |        |        | 5     |
| 6  | 755.41 | 378.21 |        |        | 737.4  | 369.2  | F   | 479.26 | 240.13 | 462.23 | 231.62 |        |        | 4     |
| 7  | 812.43 | 406.72 |        |        | 794.42 | 397.72 | G   | 332.19 | 166.6  | 315.17 | 158.09 |        |        | 3     |
| 8  | 940.49 | 470.75 | 923.47 | 462.24 | 922.48 | 461.74 | Q   | 275.17 | 138.09 | 258.14 | 129.58 |        |        | 2     |
| 9  |        |        |        |        |        |        | K   | 147.11 | 74.06  | 130.09 | 65.55  |        |        | 1     |

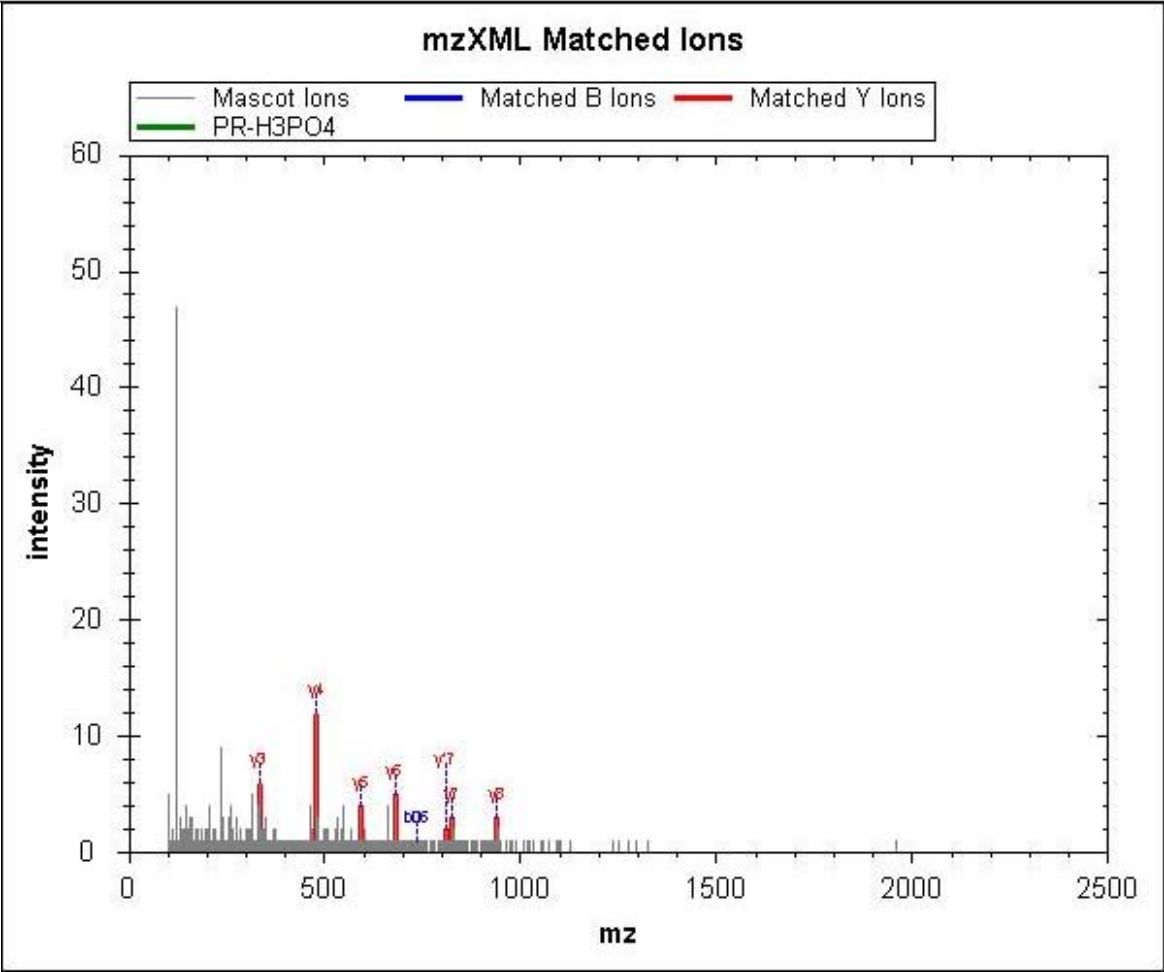

Protein index=921, ACC No:IPI00011229

Peptide index=5935 MS/MS spectrum

Sequence: LVDQNIFSFYLSR, m/z:801.4199, charge:+ 2, Modification: , Mod Position:

Score: 102.6, Raw data:WET\_A4\_090615\_02.mzxml, MS/MS Elution time: 80.11934, Scan number:4425, Mass delta:0.0109, Rank:1

| No | b       | b++    | b*      | b*++   | b0      | b0++   | Seq | y       | y++    | y*      | y*++   | y0      | y0++   | RevNo |
|----|---------|--------|---------|--------|---------|--------|-----|---------|--------|---------|--------|---------|--------|-------|
| 1  | 114.09  | 57.55  |         |        |         |        | L   |         |        |         |        |         |        | 13    |
| 2  | 213.16  | 107.08 |         |        |         |        | V   | 1488.75 | 744.88 | 1471.72 | 736.36 | 1470.74 | 735.87 | 12    |
| 3  | 328.19  | 164.6  |         |        | 310.18  | 155.59 | D   | 1389.68 | 695.34 | 1372.65 | 686.83 | 1371.67 | 686.34 | 11    |
| 4  | 456.25  | 228.63 | 439.22  | 220.11 | 438.23  | 219.62 | Q   | 1274.65 | 637.83 | 1257.63 | 629.32 | 1256.64 | 628.82 | 10    |
| 5  | 570.29  | 285.65 | 553.26  | 277.13 | 552.28  | 276.64 | N   | 1146.59 | 573.8  | 1129.57 | 565.29 | 1128.58 | 564.8  | 9     |
| 6  | 683.37  | 342.19 | 666.35  | 333.68 | 665.36  | 333.18 | I   | 1032.55 | 516.78 | 1015.52 | 508.27 | 1014.54 | 507.77 | 8     |
| 7  | 830.44  | 415.72 | 813.41  | 407.21 | 812.43  | 406.72 | F   | 919.47  | 460.24 | 902.44  | 451.72 | 901.46  | 451.23 | 7     |
| 8  | 917.47  | 459.24 | 900.45  | 450.73 | 899.46  | 450.23 | S   | 772.4   | 386.7  | 755.37  | 378.19 | 754.39  | 377.7  | 6     |
| 9  | 1064.54 | 532.77 | 1047.51 | 524.26 | 1046.53 | 523.77 | F   | 685.37  | 343.19 | 668.34  | 334.67 | 667.36  | 334.18 | 5     |
| 10 | 1227.6  | 614.31 | 1210.58 | 605.79 | 1209.59 | 605.3  | Y   | 538.3   | 269.65 | 521.27  | 261.14 | 520.29  | 260.65 | 4     |
| 11 | 1340.69 | 670.85 | 1323.66 | 662.33 | 1322.68 | 661.84 | L   | 375.24  | 188.12 | 358.21  | 179.61 | 357.22  | 179.12 | 3     |
| 12 | 1427.72 | 714.36 | 1410.69 | 705.85 | 1409.71 | 705.36 | S   | 262.15  | 131.58 | 245.12  | 123.07 | 244.14  | 122.57 | 2     |

|    |  |  |  |  |   |        |       |        |       |  |  |   |
|----|--|--|--|--|---|--------|-------|--------|-------|--|--|---|
| 13 |  |  |  |  | R | 175.12 | 88.06 | 158.09 | 79.55 |  |  | 1 |
|----|--|--|--|--|---|--------|-------|--------|-------|--|--|---|

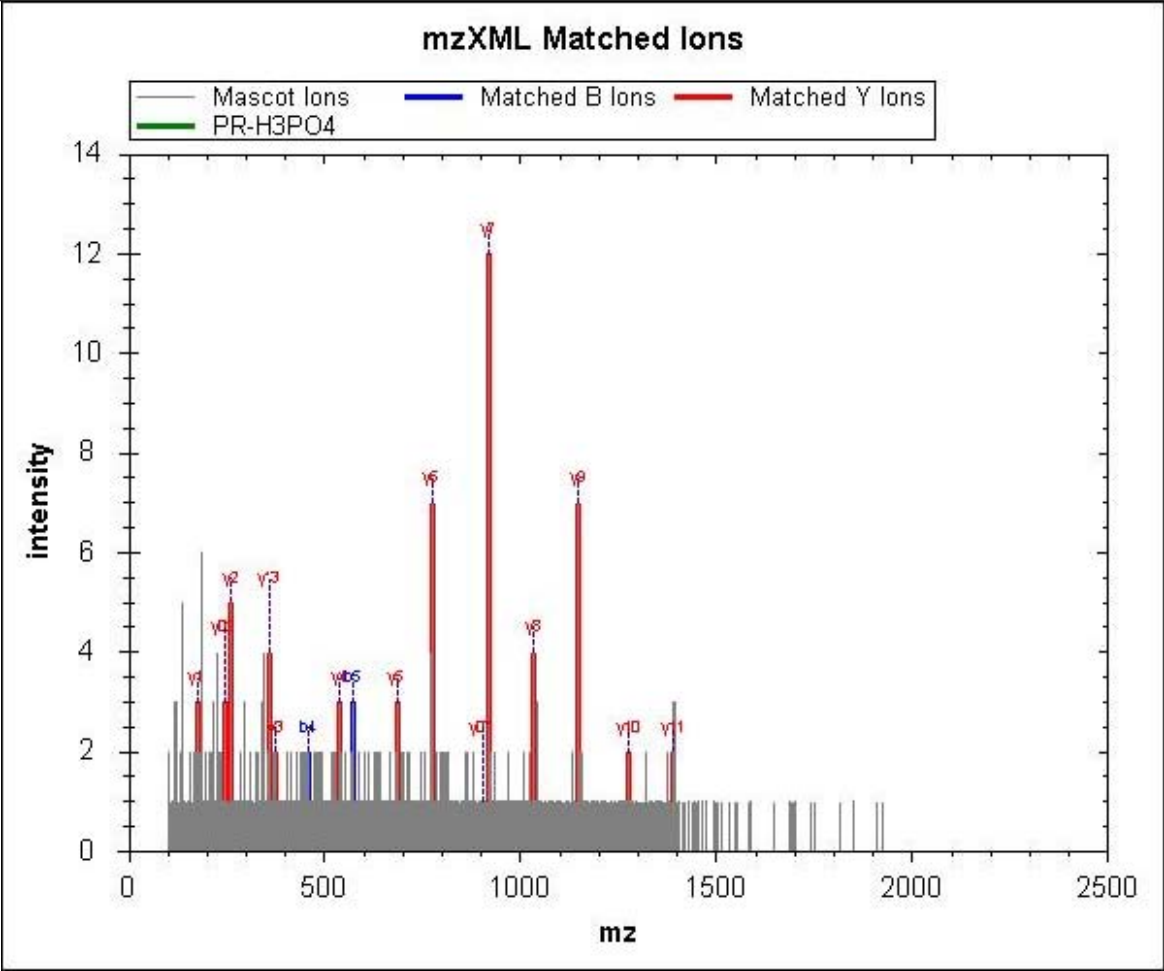

Protein index=922, ACC No:IPI00030243

Peptide index=5880 MS/MS spectrum

Sequence: MWVQLLIPR, m/z:578.3387, charge:+ 2, Modification: , Mod Position:

Score: 59.66, Raw data:WET\_A4\_090615\_03.mzxml, MS/MS Elution time: 79.43501, Scan number:4384, Mass delta:-0.0002, Rank:1

| No | b      | b++    | b*     | b*++   | Seq | y       | y++    | y*     | y*++   | RevNo |
|----|--------|--------|--------|--------|-----|---------|--------|--------|--------|-------|
| 1  | 132.05 | 66.53  |        |        | M   |         |        |        |        | 9     |
| 2  | 318.13 | 159.57 |        |        | W   | 1024.63 | 512.82 | 1007.6 | 504.31 | 8     |
| 3  | 417.2  | 209.1  |        |        | V   | 838.55  | 419.78 | 821.52 | 411.27 | 7     |
| 4  | 545.25 | 273.13 | 528.23 | 264.62 | Q   | 739.48  | 370.24 | 722.46 | 361.73 | 6     |
| 5  | 658.34 | 329.67 | 641.31 | 321.16 | L   | 611.42  | 306.22 | 594.4  | 297.7  | 5     |
| 6  | 771.42 | 386.21 | 754.4  | 377.7  | L   | 498.34  | 249.67 | 481.31 | 241.16 | 4     |
| 7  | 884.51 | 442.76 | 867.48 | 434.24 | I   | 385.26  | 193.13 | 368.23 | 184.62 | 3     |
| 8  | 981.56 | 491.28 | 964.53 | 482.77 | P   | 272.17  | 136.59 | 255.15 | 128.08 | 2     |
| 9  |        |        |        |        | R   | 175.12  | 88.06  | 158.09 | 79.55  | 1     |

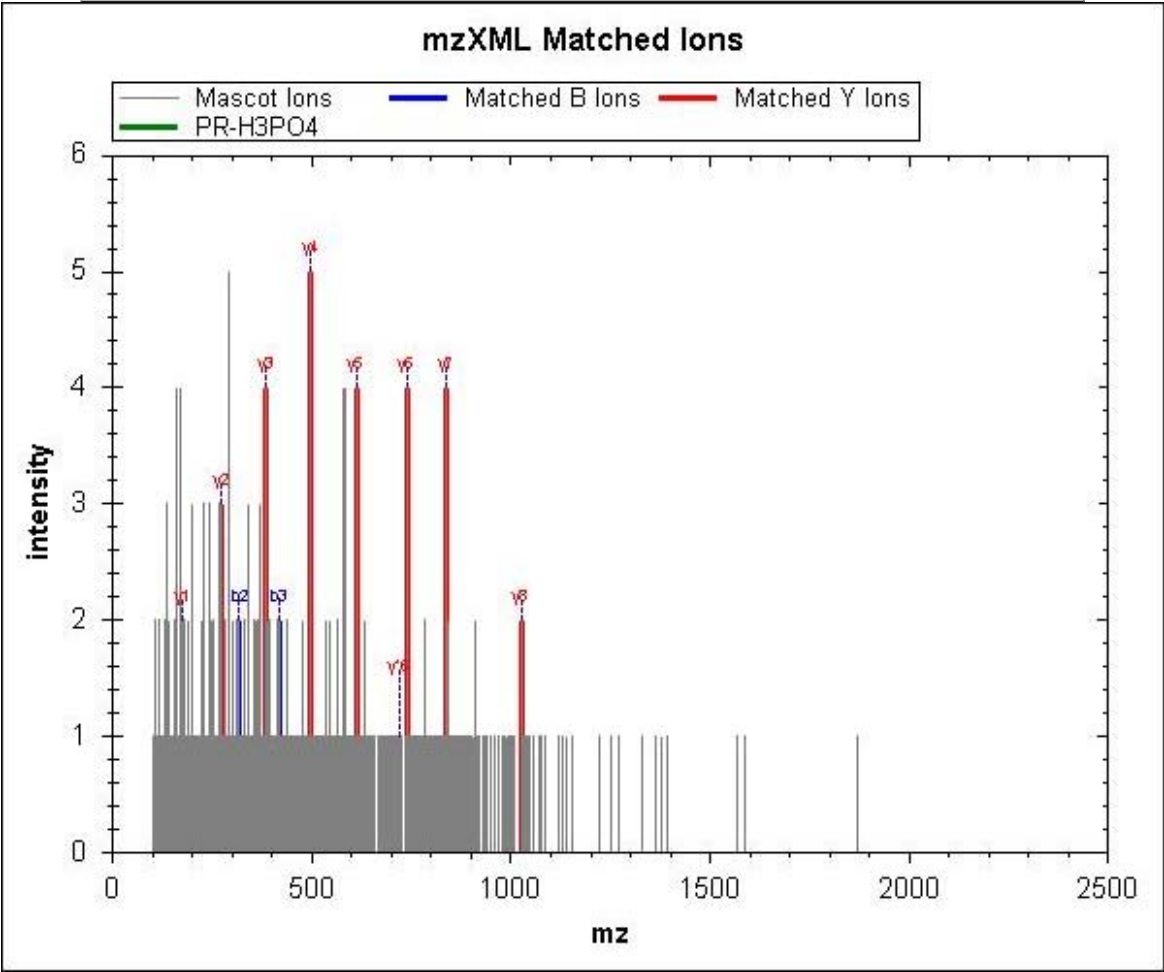

Protein index=923, ACC No:IPI00178440

Peptide index=4706 MS/MS spectrum

Sequence: SPAGLQVLNDYLADK, m/z:802.4216, charge:+ 2, Modification: , Mod Position:

Score: 129.48, Raw data:WET\_A4\_090615\_01.mzxml, MS/MS Elution time: 65.00083, Scan number:3554, Mass delta:0.0033, Rank:1

| No | b       | b++    | b*      | b*++   | b0      | b0++   | Seq | y       | y++    | y*      | y*++   | y0      | y0++   | RevNo |
|----|---------|--------|---------|--------|---------|--------|-----|---------|--------|---------|--------|---------|--------|-------|
| 1  | 88.04   | 44.52  |         |        | 70.03   | 35.52  | S   |         |        |         |        |         |        | 15    |
| 2  | 185.09  | 93.05  |         |        | 167.08  | 84.04  | P   | 1516.8  | 758.9  | 1499.77 | 750.39 | 1498.79 | 749.9  | 14    |
| 3  | 256.13  | 128.57 |         |        | 238.12  | 119.56 | A   | 1419.75 | 710.38 | 1402.72 | 701.86 | 1401.74 | 701.37 | 13    |
| 4  | 313.15  | 157.08 |         |        | 295.14  | 148.07 | G   | 1348.71 | 674.86 | 1331.68 | 666.35 | 1330.7  | 665.85 | 12    |
| 5  | 426.23  | 213.62 |         |        | 408.22  | 204.62 | L   | 1291.69 | 646.35 | 1274.66 | 637.84 | 1273.68 | 637.34 | 11    |
| 6  | 554.29  | 277.65 | 537.27  | 269.14 | 536.28  | 268.64 | Q   | 1178.61 | 589.81 | 1161.58 | 581.29 | 1160.59 | 580.8  | 10    |
| 7  | 653.36  | 327.18 | 636.34  | 318.67 | 635.35  | 318.18 | V   | 1050.55 | 525.78 | 1033.52 | 517.26 | 1032.54 | 516.77 | 9     |
| 8  | 766.45  | 383.73 | 749.42  | 375.21 | 748.44  | 374.72 | L   | 951.48  | 476.24 | 934.45  | 467.73 | 933.47  | 467.24 | 8     |
| 9  | 880.49  | 440.75 | 863.46  | 432.23 | 862.48  | 431.74 | N   | 838.39  | 419.7  | 821.37  | 411.19 | 820.38  | 410.7  | 7     |
| 10 | 995.52  | 498.26 | 978.49  | 489.75 | 977.51  | 489.26 | D   | 724.35  | 362.68 | 707.32  | 354.17 | 706.34  | 353.67 | 6     |
| 11 | 1158.58 | 579.79 | 1141.55 | 571.28 | 1140.57 | 570.79 | Y   | 609.32  | 305.17 | 592.3   | 296.65 | 591.31  | 296.16 | 5     |
| 12 | 1271.66 | 636.34 | 1254.64 | 627.82 | 1253.65 | 627.33 | L   | 446.26  | 223.63 | 429.23  | 215.12 | 428.25  | 214.63 | 4     |



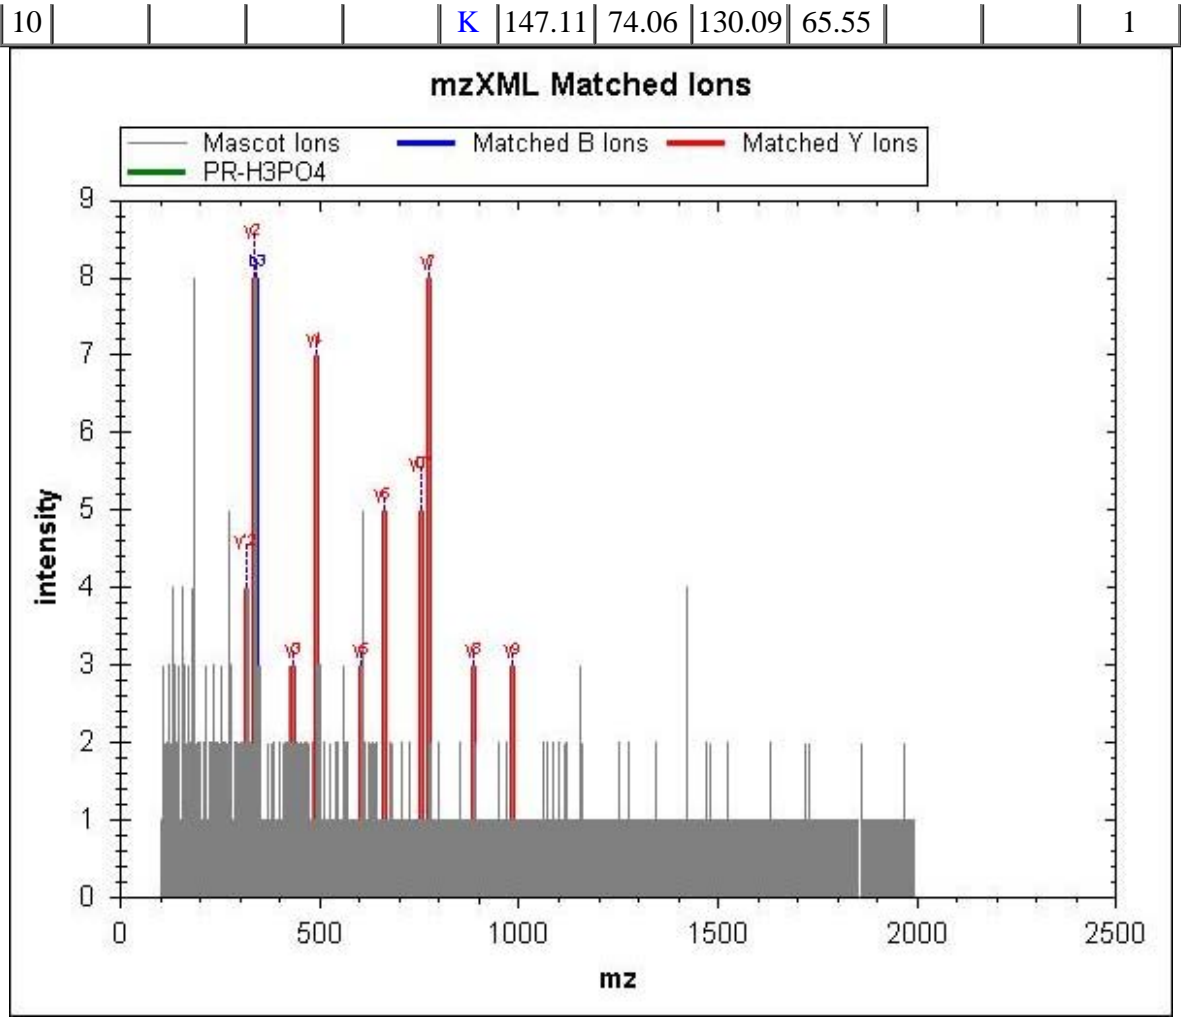

Protein index=926, ACC No:IP100290544

Peptide index=5974 MS/MS spectrum

Sequence: VLGHVNNILISAVLPTAFR, m/z:678.7295, charge:+ 3, Modification: , Mod Position:

Score: 70, Raw data:WET\_A4\_090615\_01.mzxml, MS/MS Elution time: 80.53967, Scan number:4456, Mass delta:-0.0118, Rank:1

| No | b       | b++    | b*      | b*++   | b0      | b0++   | Seq | y       | y++    | y*      | y*++   | y0      | y0++   | RevNo |
|----|---------|--------|---------|--------|---------|--------|-----|---------|--------|---------|--------|---------|--------|-------|
| 1  | 100.08  | 50.54  |         |        |         |        | V   |         |        |         |        |         |        | 19    |
| 2  | 213.16  | 107.08 |         |        |         |        | L   | 1935.12 | 968.06 | 1918.09 | 959.55 | 1917.11 | 959.06 | 18    |
| 3  | 270.18  | 135.59 |         |        |         |        | G   | 1822.03 | 911.52 | 1805.01 | 903.01 | 1804.02 | 902.52 | 17    |
| 4  | 407.24  | 204.12 |         |        |         |        | H   | 1765.01 | 883.01 | 1747.99 | 874.5  | 1747    | 874    | 16    |
| 5  | 506.31  | 253.66 |         |        |         |        | V   | 1627.95 | 814.48 | 1610.93 | 805.97 | 1609.94 | 805.47 | 15    |
| 6  | 620.35  | 310.68 | 603.32  | 302.17 |         |        | N   | 1528.88 | 764.95 | 1511.86 | 756.43 | 1510.87 | 755.94 | 14    |
| 7  | 734.39  | 367.7  | 717.37  | 359.19 |         |        | N   | 1414.84 | 707.92 | 1397.82 | 699.41 | 1396.83 | 698.92 | 13    |
| 8  | 847.48  | 424.24 | 830.45  | 415.73 |         |        | I   | 1300.8  | 650.9  | 1283.77 | 642.39 | 1282.79 | 641.9  | 12    |
| 9  | 960.56  | 480.78 | 943.54  | 472.27 |         |        | L   | 1187.71 | 594.36 | 1170.69 | 585.85 | 1169.7  | 585.36 | 11    |
| 10 | 1073.65 | 537.33 | 1056.62 | 528.81 |         |        | I   | 1074.63 | 537.82 | 1057.6  | 529.31 | 1056.62 | 528.81 | 10    |
| 11 | 1160.68 | 580.84 | 1143.65 | 572.33 | 1142.67 | 571.84 | S   | 961.55  | 481.28 | 944.52  | 472.76 | 943.54  | 472.27 | 9     |

|    |         |        |         |        |         |        |   |        |        |        |        |        |        |   |
|----|---------|--------|---------|--------|---------|--------|---|--------|--------|--------|--------|--------|--------|---|
| 12 | 1231.72 | 616.36 | 1214.69 | 607.85 | 1213.71 | 607.36 | A | 874.51 | 437.76 | 857.49 | 429.25 | 856.5  | 428.76 | 8 |
| 13 | 1330.78 | 665.9  | 1313.76 | 657.38 | 1312.77 | 656.89 | V | 803.48 | 402.24 | 786.45 | 393.73 | 785.47 | 393.24 | 7 |
| 14 | 1443.87 | 722.44 | 1426.84 | 713.92 | 1425.86 | 713.43 | L | 704.41 | 352.71 | 687.38 | 344.19 | 686.4  | 343.7  | 6 |
| 15 | 1540.92 | 770.96 | 1523.89 | 762.45 | 1522.91 | 761.96 | P | 591.32 | 296.17 | 574.3  | 287.65 | 573.31 | 287.16 | 5 |
| 16 | 1641.97 | 821.49 | 1624.94 | 812.97 | 1623.96 | 812.48 | T | 494.27 | 247.64 | 477.25 | 239.13 | 476.26 | 238.63 | 4 |
| 17 | 1713.01 | 857.01 | 1695.98 | 848.49 | 1695    | 848    | A | 393.22 | 197.12 | 376.2  | 188.6  |        |        | 3 |
| 18 | 1860.07 | 930.54 | 1843.05 | 922.03 | 1842.06 | 921.54 | F | 322.19 | 161.6  | 305.16 | 153.08 |        |        | 2 |
| 19 |         |        |         |        |         |        | R | 175.12 | 88.06  | 158.09 | 79.55  |        |        | 1 |

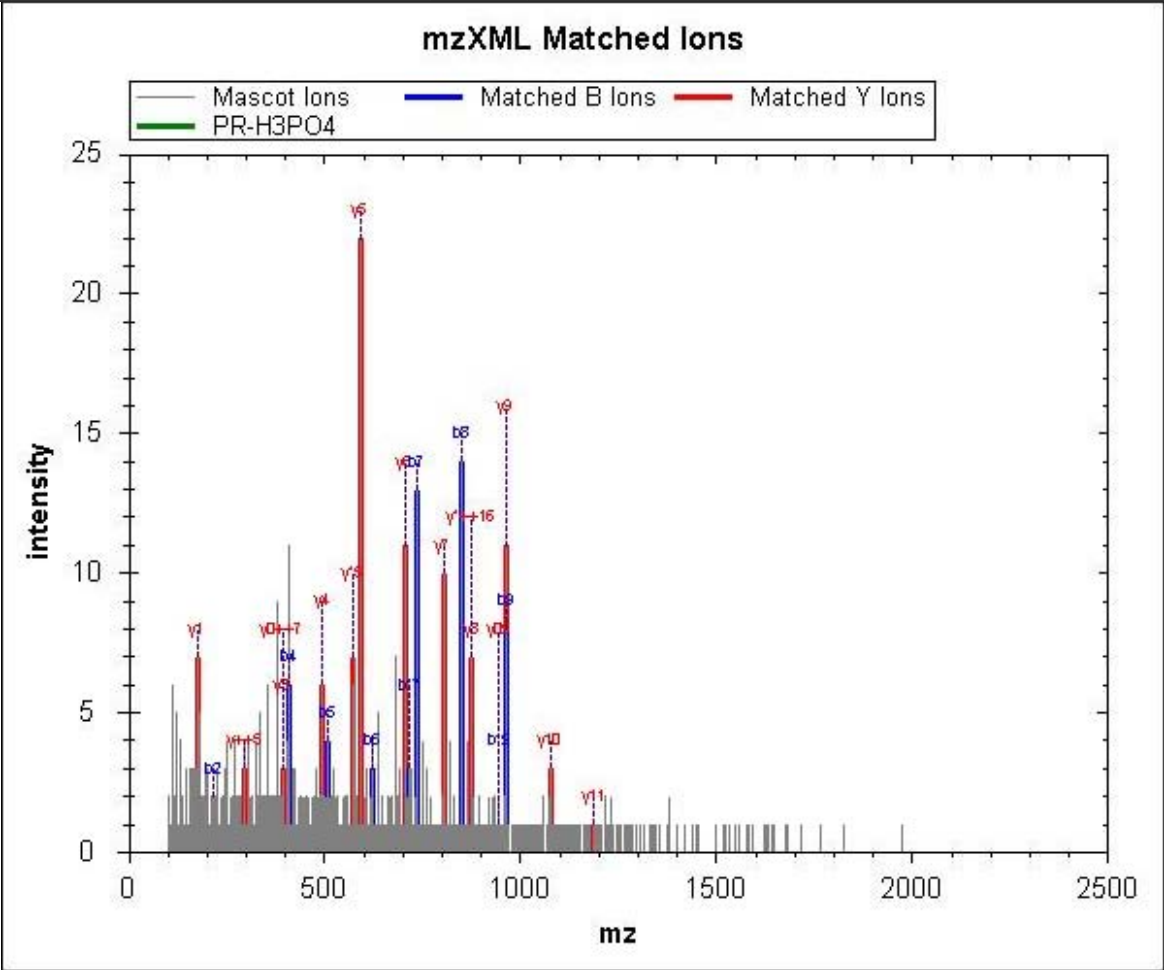

Protein index=928, ACC No:IPI00290827

Peptide index=6355 MS/MS spectrum

Sequence: FGAVTVISPLELIR, m/z:757.9528, charge:+ 2, Modification: , Mod Position:

Score: 45.46, Raw data:WET\_A4\_090615\_01.mzxml, MS/MS Elution time: 86.82417, Scan number:4821, Mass delta:0.0041, Rank:1

| No | b      | b++    | b0 | b0++ | Seq | y       | y++    | y*      | y*++   | y0      | y0++   | RevNo |
|----|--------|--------|----|------|-----|---------|--------|---------|--------|---------|--------|-------|
| 1  | 148.08 | 74.54  |    |      | F   |         |        |         |        |         |        | 14    |
| 2  | 205.1  | 103.05 |    |      | G   | 1367.83 | 684.42 | 1350.8  | 675.9  | 1349.81 | 675.41 | 13    |
| 3  | 276.13 | 138.57 |    |      | A   | 1310.8  | 655.91 | 1293.78 | 647.39 | 1292.79 | 646.9  | 12    |
| 4  | 375.2  | 188.1  |    |      | V   | 1239.77 | 620.39 | 1222.74 | 611.87 | 1221.76 | 611.38 | 11    |



|    |        |        |        |        |        |        |   |        |        |        |        |        |        |   |
|----|--------|--------|--------|--------|--------|--------|---|--------|--------|--------|--------|--------|--------|---|
| 3  | 340.19 | 170.6  |        |        | 322.18 | 161.59 | E | 944.48 | 472.74 | 927.45 | 464.23 | 926.47 | 463.74 | 8 |
| 4  | 455.21 | 228.11 |        |        | 437.2  | 219.11 | D | 815.44 | 408.22 | 798.41 | 399.71 | 797.43 | 399.22 | 7 |
| 5  | 583.27 | 292.14 | 566.25 | 283.63 | 565.26 | 283.13 | Q | 700.41 | 350.71 | 683.38 | 342.2  |        |        | 6 |
| 6  | 654.31 | 327.66 | 637.28 | 319.15 | 636.3  | 318.65 | A | 572.35 | 286.68 | 555.32 | 278.17 |        |        | 5 |
| 7  | 753.38 | 377.19 | 736.35 | 368.68 | 735.37 | 368.19 | V | 501.31 | 251.16 | 484.29 | 242.65 |        |        | 4 |
| 8  | 866.46 | 433.73 | 849.44 | 425.22 | 848.45 | 424.73 | I | 402.25 | 201.63 | 385.22 | 193.11 |        |        | 3 |
| 9  | 980.5  | 490.76 | 963.48 | 482.24 | 962.49 | 481.75 | N | 289.16 | 145.08 | 272.14 | 136.57 |        |        | 2 |
| 10 |        |        |        |        |        |        | R | 175.12 | 88.06  | 158.09 | 79.55  |        |        | 1 |

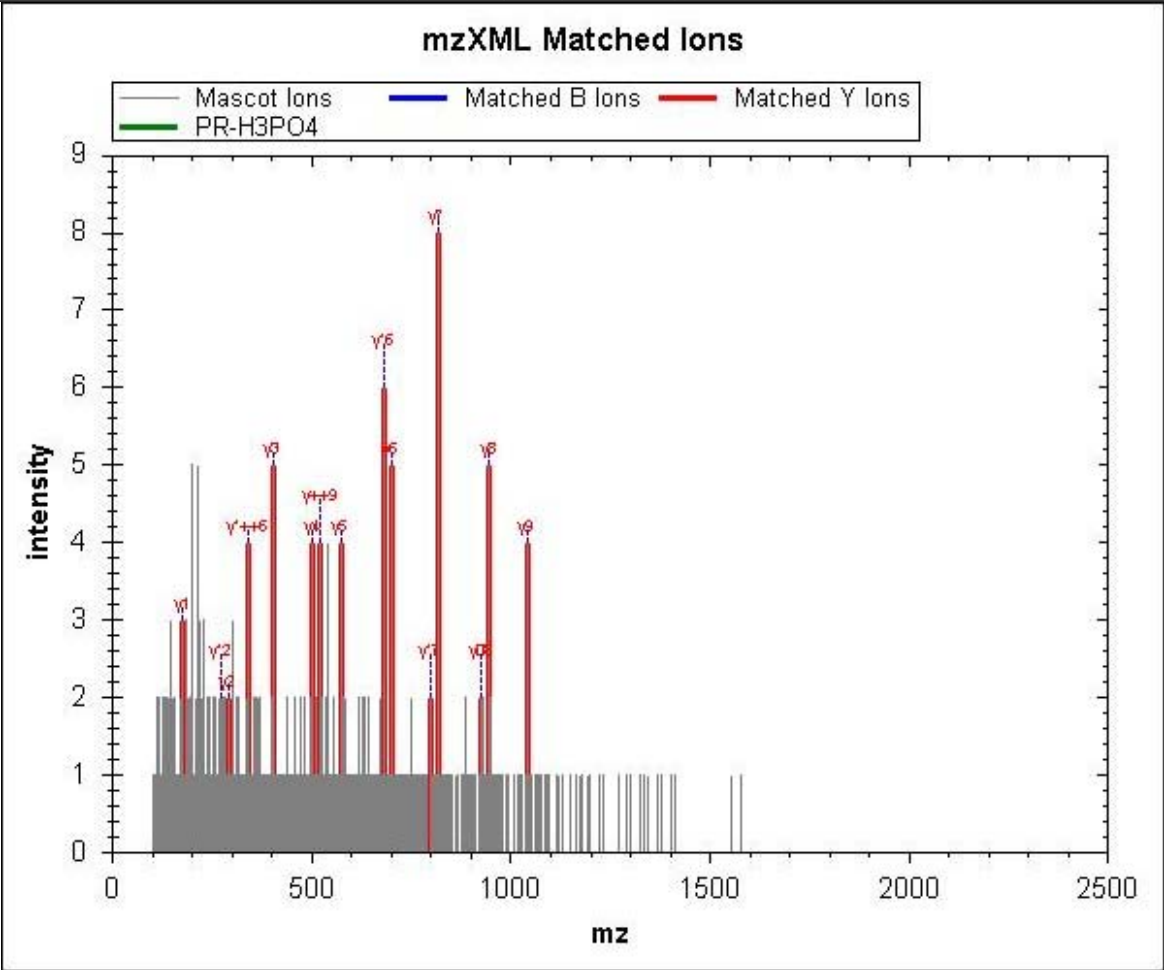

Protein index=931, ACC No:IPI00045536

Peptide index=6726 MS/MS spectrum

Sequence: NQHFDGFVVEVWNQLLSQK, m/z:763.3883, charge:+ 3, Modification: , Mod Position:

Score: 57.74, Raw data:WET\_A4\_090615\_02.mzxml, MS/MS Elution time: 94.995, Scan number:5289, Mass delta:0.0046, Rank:1

| No | b      | b++    | b*     | b*++   | b0 | b0++ | Seq | y       | y++     | y*      | y*++    | y0      | y0++    | RevNo |
|----|--------|--------|--------|--------|----|------|-----|---------|---------|---------|---------|---------|---------|-------|
| 1  | 115.05 | 58.03  | 98.02  | 49.52  |    |      | N   |         |         |         |         |         |         | 19    |
| 2  | 243.11 | 122.06 | 226.08 | 113.54 |    |      | Q   | 2174.1  | 1087.56 | 2157.08 | 1079.04 | 2156.09 | 1078.55 | 18    |
| 3  | 380.17 | 190.59 | 363.14 | 182.07 |    |      | H   | 2046.04 | 1023.53 | 2029.02 | 1015.01 | 2028.03 | 1014.52 | 17    |
| 4  | 527.24 | 264.12 | 510.21 | 255.61 |    |      | F   | 1908.99 | 955     | 1891.96 | 946.48  | 1890.97 | 945.99  | 16    |

|    |         |         |         |         |         |         |   |         |        |         |        |         |        |    |
|----|---------|---------|---------|---------|---------|---------|---|---------|--------|---------|--------|---------|--------|----|
| 5  | 642.26  | 321.64  | 625.24  | 313.12  | 624.25  | 312.63  | D | 1761.92 | 881.46 | 1744.89 | 872.95 | 1743.91 | 872.46 | 15 |
| 6  | 699.28  | 350.15  | 682.26  | 341.63  | 681.27  | 341.14  | G | 1646.89 | 823.95 | 1629.86 | 815.44 | 1628.88 | 814.94 | 14 |
| 7  | 846.35  | 423.68  | 829.33  | 415.17  | 828.34  | 414.67  | F | 1589.87 | 795.44 | 1572.84 | 786.92 | 1571.86 | 786.43 | 13 |
| 8  | 945.42  | 473.21  | 928.39  | 464.7   | 927.41  | 464.21  | V | 1442.8  | 721.9  | 1425.77 | 713.39 | 1424.79 | 712.9  | 12 |
| 9  | 1044.49 | 522.75  | 1027.46 | 514.24  | 1026.48 | 513.74  | V | 1343.73 | 672.37 | 1326.71 | 663.86 | 1325.72 | 663.36 | 11 |
| 10 | 1173.53 | 587.27  | 1156.51 | 578.76  | 1155.52 | 578.26  | E | 1244.66 | 622.84 | 1227.64 | 614.32 | 1226.65 | 613.83 | 10 |
| 11 | 1272.6  | 636.8   | 1255.57 | 628.29  | 1254.59 | 627.8   | V | 1115.62 | 558.31 | 1098.59 | 549.8  | 1097.61 | 549.31 | 9  |
| 12 | 1458.68 | 729.84  | 1441.65 | 721.33  | 1440.67 | 720.84  | W | 1016.55 | 508.78 | 999.53  | 500.27 | 998.54  | 499.77 | 8  |
| 13 | 1572.72 | 786.87  | 1555.7  | 778.35  | 1554.71 | 777.86  | N | 830.47  | 415.74 | 813.45  | 407.23 | 812.46  | 406.73 | 7  |
| 14 | 1700.78 | 850.89  | 1683.76 | 842.38  | 1682.77 | 841.89  | Q | 716.43  | 358.72 | 699.4   | 350.21 | 698.42  | 349.71 | 6  |
| 15 | 1813.87 | 907.44  | 1796.84 | 898.92  | 1795.86 | 898.43  | L | 588.37  | 294.69 | 571.34  | 286.18 | 570.36  | 285.68 | 5  |
| 16 | 1926.95 | 963.98  | 1909.92 | 955.47  | 1908.94 | 954.97  | L | 475.29  | 238.15 | 458.26  | 229.63 | 457.28  | 229.14 | 4  |
| 17 | 2013.98 | 1007.49 | 1996.96 | 998.98  | 1995.97 | 998.49  | S | 362.2   | 181.61 | 345.18  | 173.09 | 344.19  | 172.6  | 3  |
| 18 | 2142.04 | 1071.52 | 2125.01 | 1063.01 | 2124.03 | 1062.52 | Q | 275.17  | 138.09 | 258.14  | 129.58 |         |        | 2  |
| 19 |         |         |         |         |         |         | K | 147.11  | 74.06  | 130.09  | 65.55  |         |        | 1  |

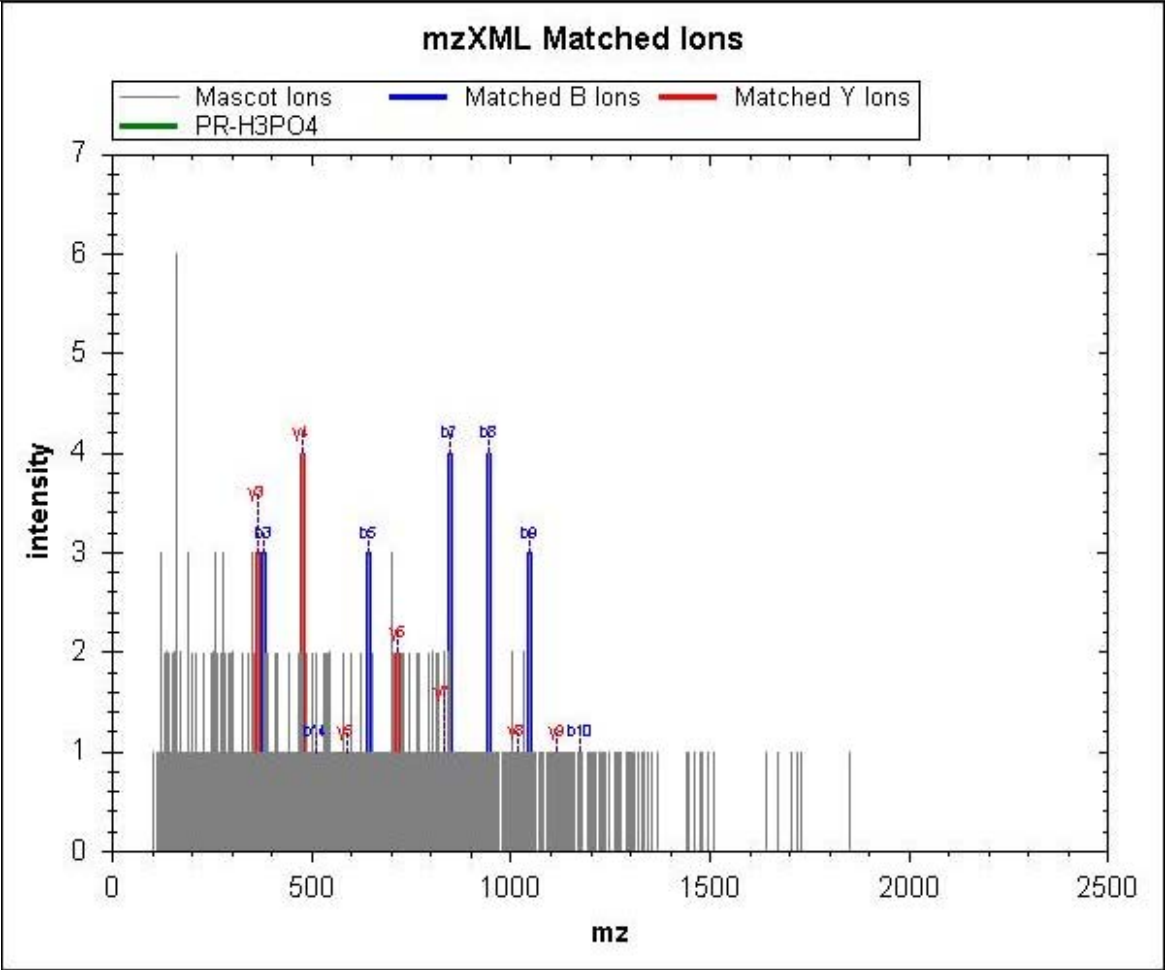

Protein index=933, ACC No:IP100013468

Peptide index=1748 MS/MS spectrum

Sequence: MHDLNTDQENLVGTHDAPIR, m/z:764.6953, charge:+ 3, Modification: Oxidation (M), Mod Position: 0.10000000000000000000.0

Score: 37.51, Raw data:WET\_A4\_090615\_02.mzxml, MS/MS Elution time: 37.23917, Scan number:1934, Mass delta:0.004, Rank:1

| No | b       | b++     | b*      | b*++    | b0      | b0++    | Seq | y       | y++     | y*      | y*++    | y0      | y0++    | RevNo |
|----|---------|---------|---------|---------|---------|---------|-----|---------|---------|---------|---------|---------|---------|-------|
| 1  | 84.04   | 42.53   |         |         |         |         | M   |         |         |         |         |         |         | 20    |
| 2  | 221.1   | 111.06  |         |         |         |         | H   | 2145.03 | 1073.02 | 2128.01 | 1064.51 | 2127.02 | 1064.01 | 19    |
| 3  | 336.13  | 168.57  |         |         | 318.12  | 159.56  | D   | 2007.97 | 1004.49 | 1990.95 | 995.98  | 1989.96 | 995.48  | 18    |
| 4  | 449.21  | 225.11  |         |         | 431.2   | 216.11  | L   | 1892.95 | 946.98  | 1875.92 | 938.46  | 1874.94 | 937.97  | 17    |
| 5  | 563.26  | 282.13  | 546.23  | 273.62  | 545.25  | 273.13  | N   | 1779.86 | 890.43  | 1762.84 | 881.92  | 1761.85 | 881.43  | 16    |
| 6  | 664.3   | 332.66  | 647.28  | 324.14  | 646.29  | 323.65  | T   | 1665.82 | 833.41  | 1648.79 | 824.9   | 1647.81 | 824.41  | 15    |
| 7  | 779.33  | 390.17  | 762.31  | 381.66  | 761.32  | 381.16  | D   | 1564.77 | 782.89  | 1547.74 | 774.38  | 1546.76 | 773.88  | 14    |
| 8  | 907.39  | 454.2   | 890.36  | 445.69  | 889.38  | 445.19  | Q   | 1449.74 | 725.38  | 1432.72 | 716.86  | 1431.73 | 716.37  | 13    |
| 9  | 1036.43 | 518.72  | 1019.41 | 510.21  | 1018.42 | 509.71  | E   | 1321.69 | 661.35  | 1304.66 | 652.83  | 1303.68 | 652.34  | 12    |
| 10 | 1150.48 | 575.74  | 1133.45 | 567.23  | 1132.47 | 566.74  | N   | 1192.64 | 596.83  | 1175.62 | 588.31  | 1174.63 | 587.82  | 11    |
| 11 | 1263.56 | 632.28  | 1246.53 | 623.77  | 1245.55 | 623.28  | L   | 1078.6  | 539.8   | 1061.57 | 531.29  | 1060.59 | 530.8   | 10    |
| 12 | 1362.63 | 681.82  | 1345.6  | 673.3   | 1344.62 | 672.81  | V   | 965.52  | 483.26  | 948.49  | 474.75  | 947.51  | 474.26  | 9     |
| 13 | 1419.65 | 710.33  | 1402.62 | 701.82  | 1401.64 | 701.32  | G   | 866.45  | 433.73  | 849.42  | 425.21  | 848.44  | 424.72  | 8     |
| 14 | 1520.7  | 760.85  | 1503.67 | 752.34  | 1502.69 | 751.85  | T   | 809.43  | 405.22  | 792.4   | 396.7   | 791.42  | 396.21  | 7     |
| 15 | 1657.76 | 829.38  | 1640.73 | 820.87  | 1639.75 | 820.38  | H   | 708.38  | 354.69  | 691.35  | 346.18  | 690.37  | 345.69  | 6     |
| 16 | 1772.78 | 886.9   | 1755.76 | 878.38  | 1754.77 | 877.89  | D   | 571.32  | 286.16  | 554.29  | 277.65  | 553.31  | 277.16  | 5     |
| 17 | 1843.82 | 922.41  | 1826.79 | 913.9   | 1825.81 | 913.41  | A   | 456.29  | 228.65  | 439.27  | 220.14  |         |         | 4     |
| 18 | 1940.87 | 970.94  | 1923.85 | 962.43  | 1922.86 | 961.94  | P   | 385.26  | 193.13  | 368.23  | 184.62  |         |         | 3     |
| 19 | 2053.96 | 1027.48 | 2036.93 | 1018.97 | 2035.95 | 1018.48 | I   | 288.2   | 144.61  | 271.18  | 136.09  |         |         | 2     |
| 20 |         |         |         |         |         |         | R   | 175.12  | 88.06   | 158.09  | 79.55   |         |         | 1     |

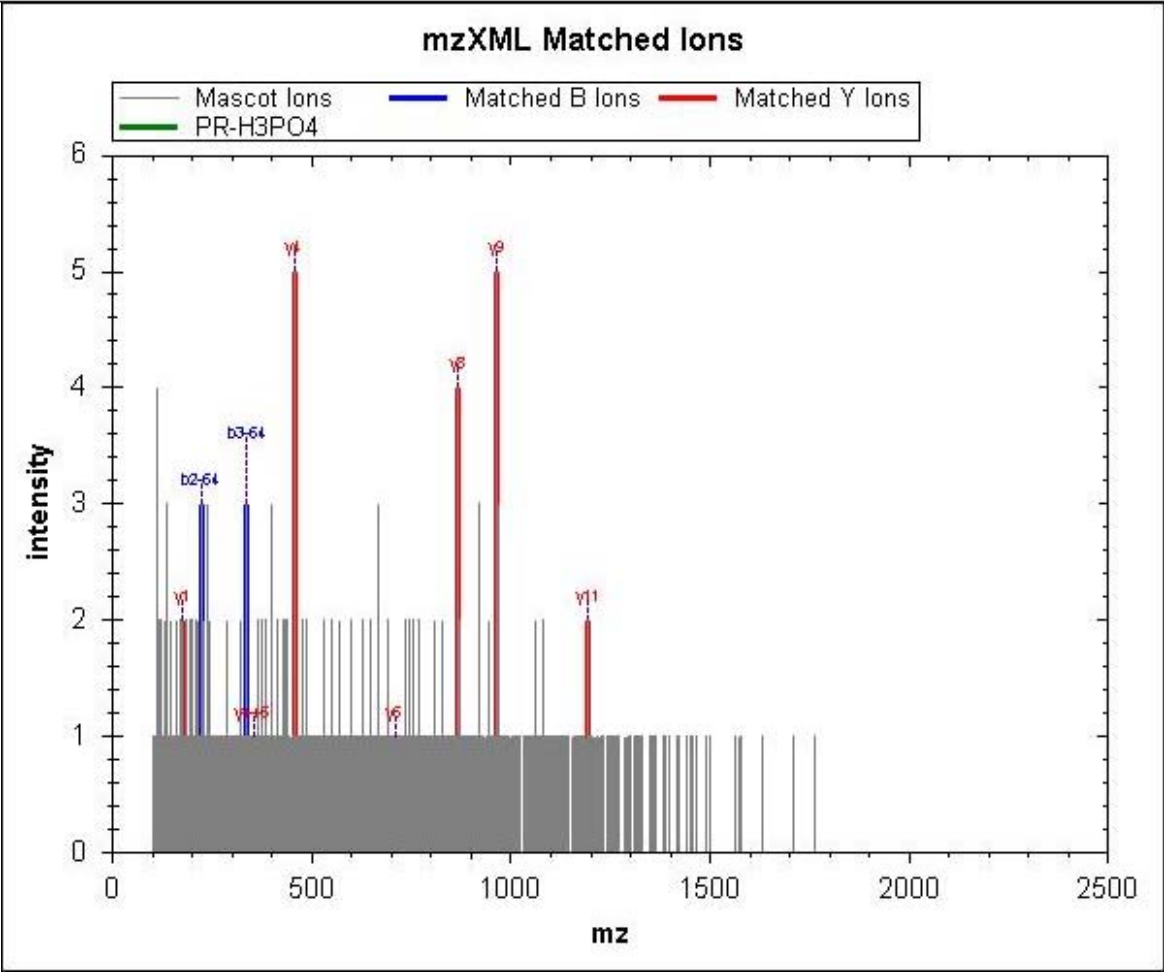

Protein index=935, ACC No:IPI00103853

Peptide index=6983 MS/MS spectrum

Sequence: GNAALAE~~LD~~QLLAVADFGPR, m/z:1021.042, charge:+ 2, Modification: , Mod Position:

Score: 69.91, Raw data:WET\_B4\_090616\_02.mzxml, MS/MS Elution time: 102.8747, Scan number:5760, Mass delta:0.0065, Rank:1

| No | b       | b++    | b*      | b*++   | b0      | b0++   | Seq | y       | y++    | y*      | y*++   | y0      | y0++   | RevNo |
|----|---------|--------|---------|--------|---------|--------|-----|---------|--------|---------|--------|---------|--------|-------|
| 1  | 58.03   | 29.52  |         |        |         |        | G   |         |        |         |        |         |        | 20    |
| 2  | 172.07  | 86.54  | 155.05  | 78.03  |         |        | N   | 1984.05 | 992.53 | 1967.02 | 984.02 | 1966.04 | 983.52 | 19    |
| 3  | 243.11  | 122.06 | 226.08  | 113.54 |         |        | A   | 1870.01 | 935.51 | 1852.98 | 926.99 | 1852    | 926.5  | 18    |
| 4  | 314.15  | 157.58 | 297.12  | 149.06 |         |        | A   | 1798.97 | 899.99 | 1781.94 | 891.48 | 1780.96 | 890.98 | 17    |
| 5  | 427.23  | 214.12 | 410.2   | 205.61 |         |        | L   | 1727.93 | 864.47 | 1710.91 | 855.96 | 1709.92 | 855.46 | 16    |
| 6  | 498.27  | 249.64 | 481.24  | 241.12 |         |        | A   | 1614.85 | 807.93 | 1597.82 | 799.41 | 1596.84 | 798.92 | 15    |
| 7  | 627.31  | 314.16 | 610.28  | 305.65 | 609.3   | 305.15 | E   | 1543.81 | 772.41 | 1526.79 | 763.9  | 1525.8  | 763.4  | 14    |
| 8  | 740.39  | 370.7  | 723.37  | 362.19 | 722.38  | 361.7  | L   | 1414.77 | 707.89 | 1397.74 | 699.37 | 1396.76 | 698.88 | 13    |
| 9  | 855.42  | 428.21 | 838.39  | 419.7  | 837.41  | 419.21 | D   | 1301.68 | 651.35 | 1284.66 | 642.83 | 1283.67 | 642.34 | 12    |
| 10 | 983.48  | 492.24 | 966.45  | 483.73 | 965.47  | 483.24 | Q   | 1186.66 | 593.83 | 1169.63 | 585.32 | 1168.65 | 584.83 | 11    |
| 11 | 1096.56 | 548.79 | 1079.54 | 540.27 | 1078.55 | 539.78 | L   | 1058.6  | 529.8  | 1041.57 | 521.29 | 1040.59 | 520.8  | 10    |
| 12 | 1209.65 | 605.33 | 1192.62 | 596.81 | 1191.64 | 596.32 | L   | 945.52  | 473.26 | 928.49  | 464.75 | 927.5   | 464.26 | 9     |

|    |         |        |         |        |         |        |   |        |        |        |        |        |        |   |
|----|---------|--------|---------|--------|---------|--------|---|--------|--------|--------|--------|--------|--------|---|
| 13 | 1280.68 | 640.85 | 1263.66 | 632.33 | 1262.67 | 631.84 | A | 832.43 | 416.72 | 815.4  | 408.21 | 814.42 | 407.71 | 8 |
| 14 | 1379.75 | 690.38 | 1362.73 | 681.87 | 1361.74 | 681.37 | V | 761.39 | 381.2  | 744.37 | 372.69 | 743.38 | 372.2  | 7 |
| 15 | 1450.79 | 725.9  | 1433.76 | 717.39 | 1432.78 | 716.89 | A | 662.33 | 331.67 | 645.3  | 323.15 | 644.32 | 322.66 | 6 |
| 16 | 1565.82 | 783.41 | 1548.79 | 774.9  | 1547.81 | 774.41 | D | 591.29 | 296.15 | 574.26 | 287.63 | 573.28 | 287.14 | 5 |
| 17 | 1712.89 | 856.95 | 1695.86 | 848.43 | 1694.87 | 847.94 | F | 476.26 | 238.63 | 459.24 | 230.12 |        |        | 4 |
| 18 | 1769.91 | 885.46 | 1752.88 | 876.94 | 1751.9  | 876.45 | G | 329.19 | 165.1  | 312.17 | 156.59 |        |        | 3 |
| 19 | 1866.96 | 933.98 | 1849.93 | 925.47 | 1848.95 | 924.98 | P | 272.17 | 136.59 | 255.15 | 128.08 |        |        | 2 |
| 20 |         |        |         |        |         |        | R | 175.12 | 88.06  | 158.09 | 79.55  |        |        | 1 |

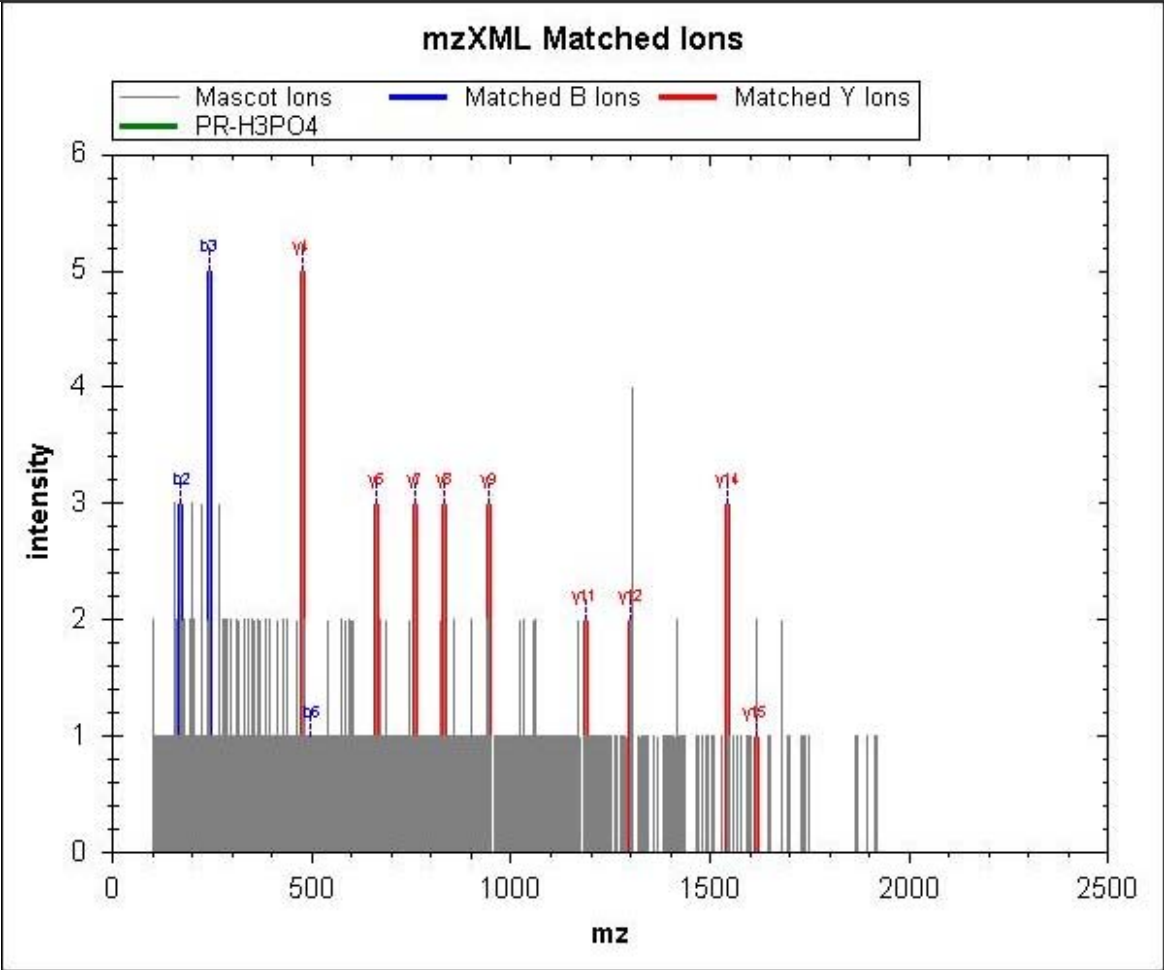

Protein index=939, ACC No:IPI00107714

Peptide index=6705 MS/MS spectrum

Sequence: AGVVSTGLIQNGDWTFQTLVMLETVPR, m/z:983.5146, charge:+ 3, Modification: Oxidation (M), Mod Position: 0.000000000000000000001000000.0

Score: 50.2, Raw data:WET\_A4\_090615\_03.mzxml, MS/MS Elution time: 94.474, Scan number:5258, Mass delta:0.0046, Rank:1

| No | b      | b++    | b* | b*++ | b0 | b0++ | Seq | y       | y++     | y*      | y*++    | y0      | y0++    | RevNo |
|----|--------|--------|----|------|----|------|-----|---------|---------|---------|---------|---------|---------|-------|
| 1  | 72.04  | 36.53  |    |      |    |      | A   |         |         |         |         |         |         | 27    |
| 2  | 129.07 | 65.04  |    |      |    |      | G   | 2877.48 | 1439.24 | 2860.45 | 1430.73 | 2859.47 | 1430.24 | 26    |
| 3  | 228.13 | 114.57 |    |      |    |      | V   | 2820.46 | 1410.73 | 2803.43 | 1402.22 | 2802.45 | 1401.73 | 25    |

|    |         |         |         |         |         |         |   |         |         |         |         |         |         |    |
|----|---------|---------|---------|---------|---------|---------|---|---------|---------|---------|---------|---------|---------|----|
| 4  | 327.2   | 164.1   |         |         |         |         | V | 2721.39 | 1361.2  | 2704.36 | 1352.69 | 2703.38 | 1352.19 | 24 |
| 5  | 414.23  | 207.62  |         |         | 396.22  | 198.62  | S | 2622.32 | 1311.67 | 2605.3  | 1303.15 | 2604.31 | 1302.66 | 23 |
| 6  | 515.28  | 258.14  |         |         | 497.27  | 249.14  | T | 2535.29 | 1268.15 | 2518.26 | 1259.64 | 2517.28 | 1259.14 | 22 |
| 7  | 572.3   | 286.66  |         |         | 554.29  | 277.65  | G | 2434.24 | 1217.63 | 2417.22 | 1209.11 | 2416.23 | 1208.62 | 21 |
| 8  | 685.39  | 343.2   |         |         | 667.38  | 334.19  | L | 2377.22 | 1189.11 | 2360.2  | 1180.6  | 2359.21 | 1180.11 | 20 |
| 9  | 798.47  | 399.74  |         |         | 780.46  | 390.73  | I | 2264.14 | 1132.57 | 2247.11 | 1124.06 | 2246.13 | 1123.57 | 19 |
| 10 | 926.53  | 463.77  | 909.5   | 455.26  | 908.52  | 454.76  | Q | 2151.05 | 1076.03 | 2134.03 | 1067.52 | 2133.04 | 1067.03 | 18 |
| 11 | 1040.57 | 520.79  | 1023.55 | 512.28  | 1022.56 | 511.79  | N | 2023    | 1012    | 2005.97 | 1003.49 | 2004.98 | 1003    | 17 |
| 12 | 1097.59 | 549.3   | 1080.57 | 540.79  | 1079.58 | 540.3   | G | 1908.95 | 954.98  | 1891.93 | 946.47  | 1890.94 | 945.97  | 16 |
| 13 | 1212.62 | 606.81  | 1195.6  | 598.3   | 1194.61 | 597.81  | D | 1851.93 | 926.47  | 1834.9  | 917.96  | 1833.92 | 917.46  | 15 |
| 14 | 1398.7  | 699.85  | 1381.67 | 691.34  | 1380.69 | 690.85  | W | 1736.9  | 868.96  | 1719.88 | 860.44  | 1718.89 | 859.95  | 14 |
| 15 | 1499.75 | 750.38  | 1482.72 | 741.86  | 1481.74 | 741.37  | T | 1550.82 | 775.92  | 1533.8  | 767.4   | 1532.81 | 766.91  | 13 |
| 16 | 1646.82 | 823.91  | 1629.79 | 815.4   | 1628.81 | 814.91  | F | 1449.78 | 725.39  | 1432.75 | 716.88  | 1431.77 | 716.39  | 12 |
| 17 | 1774.88 | 887.94  | 1757.85 | 879.43  | 1756.87 | 878.94  | Q | 1302.71 | 651.86  | 1285.68 | 643.34  | 1284.7  | 642.85  | 11 |
| 18 | 1875.92 | 938.47  | 1858.9  | 929.95  | 1857.91 | 929.46  | T | 1174.65 | 587.83  | 1157.62 | 579.32  | 1156.64 | 578.82  | 10 |
| 19 | 1989.01 | 995.01  | 1971.98 | 986.49  | 1971    | 986     | L | 1073.6  | 537.3   | 1056.58 | 528.79  | 1055.59 | 528.3   | 9  |
| 20 | 2088.08 | 1044.54 | 2071.05 | 1036.03 | 2070.07 | 1035.54 | V | 960.52  | 480.76  | 943.49  | 472.25  | 942.51  | 471.76  | 8  |
| 21 | 2235.11 | 1118.06 | 2218.08 | 1109.55 | 2217.1  | 1109.05 | M | 861.45  | 431.23  | 844.42  | 422.72  | 843.44  | 422.22  | 7  |
| 22 | 2348.2  | 1174.6  | 2331.17 | 1166.09 | 2330.19 | 1165.6  | L | 714.41  | 357.71  | 697.39  | 349.2   | 696.4   | 348.71  | 6  |
| 23 | 2477.24 | 1239.12 | 2460.21 | 1230.61 | 2459.23 | 1230.12 | E | 601.33  | 301.17  | 584.3   | 292.66  | 583.32  | 292.16  | 5  |
| 24 | 2578.29 | 1289.65 | 2561.26 | 1281.13 | 2560.28 | 1280.64 | T | 472.29  | 236.65  | 455.26  | 228.13  | 454.28  | 227.64  | 4  |
| 25 | 2677.35 | 1339.18 | 2660.33 | 1330.67 | 2659.34 | 1330.18 | V | 371.24  | 186.12  | 354.21  | 177.61  |         |         | 3  |
| 26 | 2774.41 | 1387.71 | 2757.38 | 1379.19 | 2756.4  | 1378.7  | P | 272.17  | 136.59  | 255.15  | 128.08  |         |         | 2  |
| 27 |         |         |         |         |         |         | R | 175.12  | 88.06   | 158.09  | 79.55   |         |         | 1  |

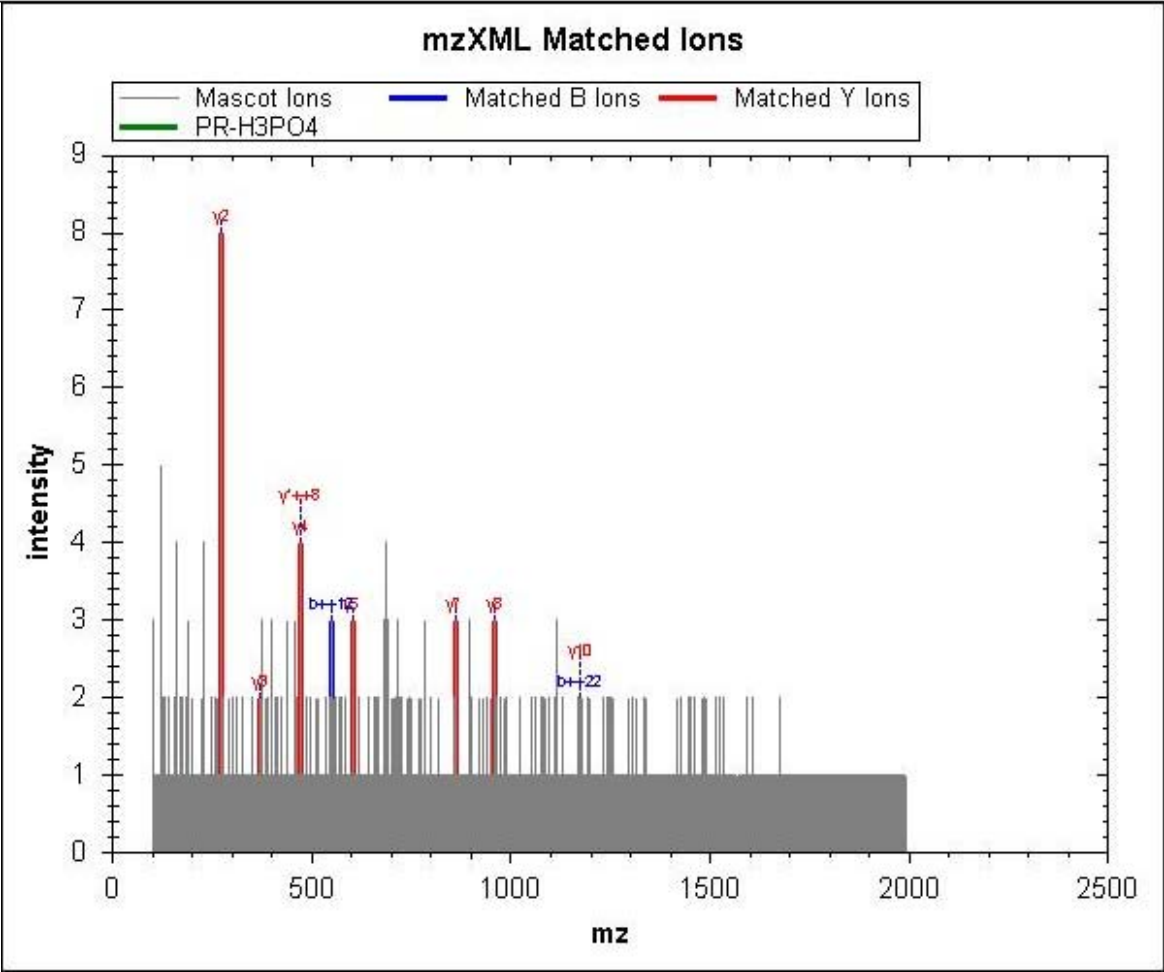

Protein index=942, ACC No:IPI00306159

Peptide index=2385 MS/MS spectrum

Sequence: SLGAEHVITEEELR, m/z:528.2699, charge:+ 3, Modification: , Mod Position:

Score: 53.6, Raw data:WET\_A4\_090615\_02.mzxml, MS/MS Elution time: 43.73883, Scan number:2312, Mass delta:-0.0121, Rank:1

| No | b       | b++    | b0      | b0++   | Seq | y       | y++    | y*      | y*++   | y0      | y0++   | RevNo |
|----|---------|--------|---------|--------|-----|---------|--------|---------|--------|---------|--------|-------|
| 1  | 88.04   | 44.52  | 70.03   | 35.52  | S   |         |        |         |        |         |        | 14    |
| 2  | 201.12  | 101.07 | 183.11  | 92.06  | L   | 1495.78 | 748.39 | 1478.75 | 739.88 | 1477.76 | 739.39 | 13    |
| 3  | 258.14  | 129.58 | 240.13  | 120.57 | G   | 1382.69 | 691.85 | 1365.66 | 683.34 | 1364.68 | 682.84 | 12    |
| 4  | 329.18  | 165.09 | 311.17  | 156.09 | A   | 1325.67 | 663.34 | 1308.64 | 654.83 | 1307.66 | 654.33 | 11    |
| 5  | 458.22  | 229.62 | 440.21  | 220.61 | E   | 1254.63 | 627.82 | 1237.61 | 619.31 | 1236.62 | 618.81 | 10    |
| 6  | 595.28  | 298.15 | 577.27  | 289.14 | H   | 1125.59 | 563.3  | 1108.56 | 554.79 | 1107.58 | 554.29 | 9     |
| 7  | 694.35  | 347.68 | 676.34  | 338.67 | V   | 988.53  | 494.77 | 971.5   | 486.26 | 970.52  | 485.76 | 8     |
| 8  | 807.44  | 404.22 | 789.43  | 395.22 | I   | 889.46  | 445.23 | 872.44  | 436.72 | 871.45  | 436.23 | 7     |
| 9  | 908.48  | 454.75 | 890.47  | 445.74 | T   | 776.38  | 388.69 | 759.35  | 380.18 | 758.37  | 379.69 | 6     |
| 10 | 1037.53 | 519.27 | 1019.52 | 510.26 | E   | 675.33  | 338.17 | 658.3   | 329.66 | 657.32  | 329.16 | 5     |
| 11 | 1166.57 | 583.79 | 1148.56 | 574.78 | E   | 546.29  | 273.65 | 529.26  | 265.13 | 528.28  | 264.64 | 4     |
| 12 | 1295.61 | 648.31 | 1277.6  | 639.3  | E   | 417.25  | 209.13 | 400.22  | 200.61 | 399.24  | 200.12 | 3     |

|    |        |        |         |        |   |        |        |        |        |  |  |   |
|----|--------|--------|---------|--------|---|--------|--------|--------|--------|--|--|---|
| 13 | 1408.7 | 704.85 | 1390.68 | 695.85 | L | 288.2  | 144.61 | 271.18 | 136.09 |  |  | 2 |
| 14 |        |        |         |        | R | 175.12 | 88.06  | 158.09 | 79.55  |  |  | 1 |

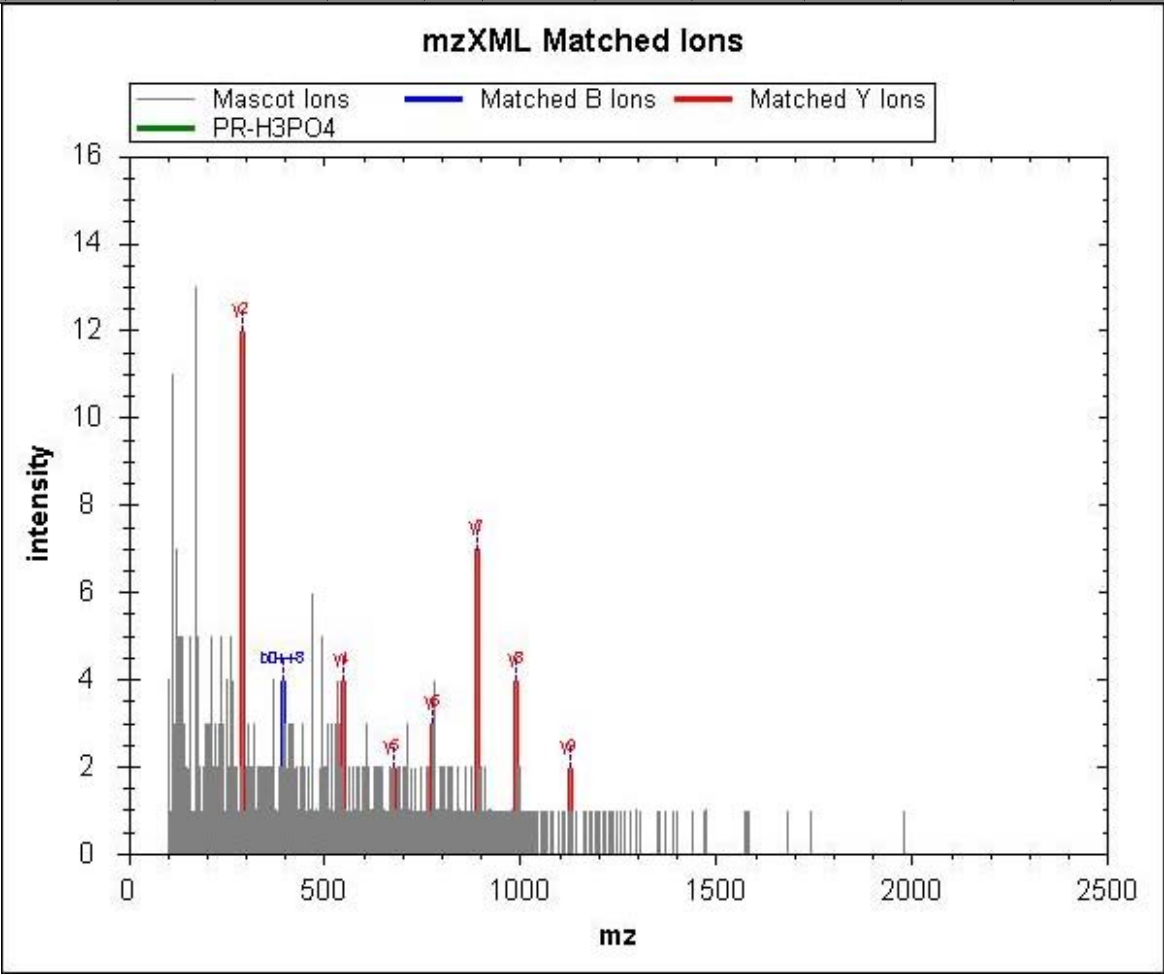

Protein index=943, ACC No: IPI00009794

Peptide index=2654 MS/MS spectrum

Sequence: ATLTCAPLARR, m/z: 586.8303, charge: + 2, Modification: , Mod Position:

Score: 35.13, Raw data: WET\_A4\_090615\_02.mzxml, MS/MS Elution time: 46.1365, Scan number: 2451, Mass delta: -0.0034, Rank: 1

| No | b      | b++    | b*     | b*++   | b0     | b0++   | Seq | y       | y++    | y*      | y*++   | y0      | y0++   | RevNo |
|----|--------|--------|--------|--------|--------|--------|-----|---------|--------|---------|--------|---------|--------|-------|
| 1  | 72.04  | 36.53  |        |        |        |        | A   |         |        |         |        |         |        | 11    |
| 2  | 173.09 | 87.05  |        |        | 155.08 | 78.04  | T   | 1101.62 | 551.31 | 1084.59 | 542.8  | 1083.61 | 542.31 | 10    |
| 3  | 286.18 | 143.59 |        |        | 268.17 | 134.59 | L   | 1000.57 | 500.79 | 983.55  | 492.28 | 982.56  | 491.78 | 9     |
| 4  | 387.22 | 194.12 |        |        | 369.21 | 185.11 | T   | 887.49  | 444.25 | 870.46  | 435.73 | 869.48  | 435.24 | 8     |
| 5  | 490.23 | 245.62 |        |        | 472.22 | 236.61 | C   | 786.44  | 393.72 | 769.41  | 385.21 |         |        | 7     |
| 6  | 561.27 | 281.14 |        |        | 543.26 | 272.13 | A   | 683.43  | 342.22 | 666.4   | 333.71 |         |        | 6     |
| 7  | 658.32 | 329.67 |        |        | 640.31 | 320.66 | P   | 612.39  | 306.7  | 595.37  | 298.19 |         |        | 5     |
| 8  | 771.41 | 386.21 |        |        | 753.4  | 377.2  | L   | 515.34  | 258.17 | 498.31  | 249.66 |         |        | 4     |
| 9  | 842.44 | 421.73 |        |        | 824.43 | 412.72 | A   | 402.26  | 201.63 | 385.23  | 193.12 |         |        | 3     |
| 10 | 998.55 | 499.78 | 981.52 | 491.26 | 980.53 | 490.77 | R   | 331.22  | 166.11 | 314.19  | 157.6  |         |        | 2     |

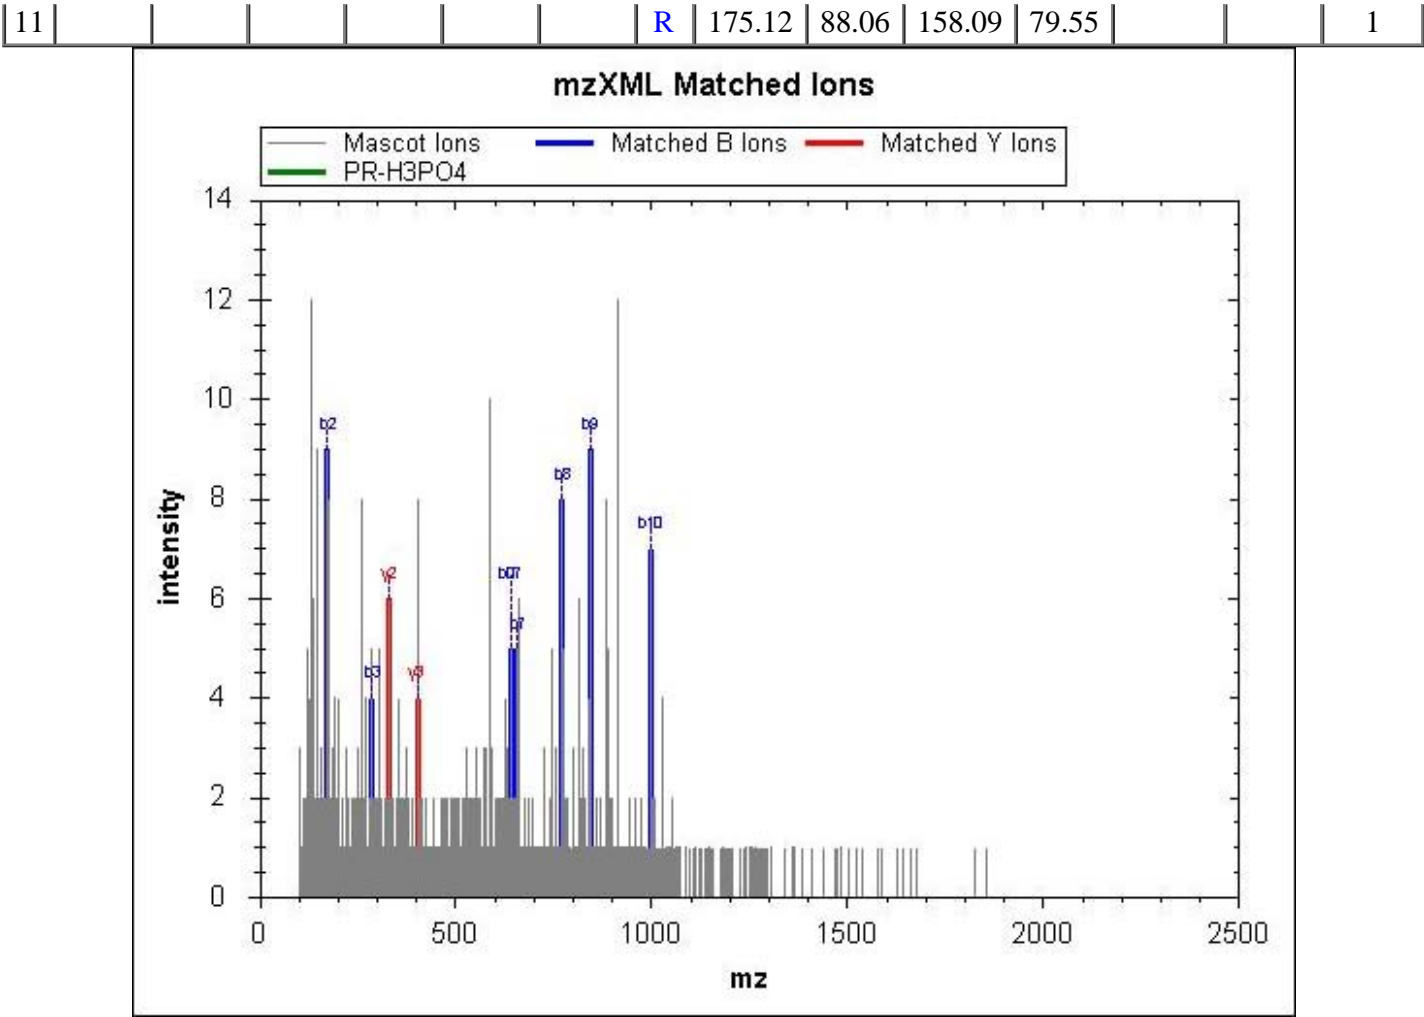

Protein index=945, ACC No:IPI00180454

Peptide index=3959 MS/MS spectrum

Sequence: EVEQFDVATHLQTAPELVDR, m/z:766.3833, charge:+ 3, Modification: , Mod Position:

Score: 69.7, Raw data:WET\_A4\_090615\_02.mzxml, MS/MS Elution time: 57.68534, Scan number:3122, Mass delta:-0.0056, Rank:1

| No | b       | b++    | b*      | b*++   | b0      | b0++   | Seq | y       | y++     | y*      | y*++    | y0      | y0++    | RevNo |
|----|---------|--------|---------|--------|---------|--------|-----|---------|---------|---------|---------|---------|---------|-------|
| 1  | 130.05  | 65.53  |         |        | 112.04  | 56.52  | E   |         |         |         |         |         |         | 20    |
| 2  | 229.12  | 115.06 |         |        | 211.11  | 106.06 | V   | 2168.1  | 1084.55 | 2151.07 | 1076.04 | 2150.09 | 1075.55 | 19    |
| 3  | 358.16  | 179.58 |         |        | 340.15  | 170.58 | E   | 2069.03 | 1035.02 | 2052    | 1026.51 | 2051.02 | 1026.01 | 18    |
| 4  | 486.22  | 243.61 | 469.19  | 235.1  | 468.21  | 234.61 | Q   | 1939.99 | 970.5   | 1922.96 | 961.98  | 1921.98 | 961.49  | 17    |
| 5  | 633.29  | 317.15 | 616.26  | 308.63 | 615.28  | 308.14 | F   | 1811.93 | 906.47  | 1794.9  | 897.95  | 1793.92 | 897.46  | 16    |
| 6  | 748.31  | 374.66 | 731.29  | 366.15 | 730.3   | 365.66 | D   | 1664.86 | 832.93  | 1647.83 | 824.42  | 1646.85 | 823.93  | 15    |
| 7  | 847.38  | 424.2  | 830.36  | 415.68 | 829.37  | 415.19 | V   | 1549.83 | 775.42  | 1532.81 | 766.91  | 1531.82 | 766.41  | 14    |
| 8  | 918.42  | 459.71 | 901.39  | 451.2  | 900.41  | 450.71 | A   | 1450.76 | 725.89  | 1433.74 | 717.37  | 1432.75 | 716.88  | 13    |
| 9  | 1019.47 | 510.24 | 1002.44 | 501.72 | 1001.46 | 501.23 | T   | 1379.73 | 690.37  | 1362.7  | 681.85  | 1361.72 | 681.36  | 12    |
| 10 | 1156.53 | 578.77 | 1139.5  | 570.25 | 1138.52 | 569.76 | H   | 1278.68 | 639.84  | 1261.65 | 631.33  | 1260.67 | 630.84  | 11    |
| 11 | 1269.61 | 635.31 | 1252.58 | 626.8  | 1251.6  | 626.3  | L   | 1141.62 | 571.31  | 1124.59 | 562.8   | 1123.61 | 562.31  | 10    |

|    |         |         |         |         |         |         |   |         |        |         |        |         |        |   |
|----|---------|---------|---------|---------|---------|---------|---|---------|--------|---------|--------|---------|--------|---|
| 12 | 1397.67 | 699.34  | 1380.64 | 690.83  | 1379.66 | 690.33  | Q | 1028.54 | 514.77 | 1011.51 | 506.26 | 1010.53 | 505.77 | 9 |
| 13 | 1498.72 | 749.86  | 1481.69 | 741.35  | 1480.71 | 740.86  | T | 900.48  | 450.74 | 883.45  | 442.23 | 882.47  | 441.74 | 8 |
| 14 | 1569.75 | 785.38  | 1552.73 | 776.87  | 1551.74 | 776.38  | A | 799.43  | 400.22 | 782.4   | 391.71 | 781.42  | 391.21 | 7 |
| 15 | 1666.81 | 833.91  | 1649.78 | 825.39  | 1648.8  | 824.9   | P | 728.39  | 364.7  | 711.37  | 356.19 | 710.38  | 355.7  | 6 |
| 16 | 1795.85 | 898.43  | 1778.82 | 889.92  | 1777.84 | 889.42  | E | 631.34  | 316.17 | 614.31  | 307.66 | 613.33  | 307.17 | 5 |
| 17 | 1908.93 | 954.97  | 1891.91 | 946.46  | 1890.92 | 945.97  | L | 502.3   | 251.65 | 485.27  | 243.14 | 484.29  | 242.65 | 4 |
| 18 | 2008    | 1004.5  | 1990.98 | 995.99  | 1989.99 | 995.5   | V | 389.21  | 195.11 | 372.19  | 186.6  | 371.2   | 186.11 | 3 |
| 19 | 2123.03 | 1062.02 | 2106    | 1053.51 | 2105.02 | 1053.01 | D | 290.15  | 145.58 | 273.12  | 137.06 | 272.14  | 136.57 | 2 |
| 20 |         |         |         |         |         |         | R | 175.12  | 88.06  | 158.09  | 79.55  |         |        | 1 |

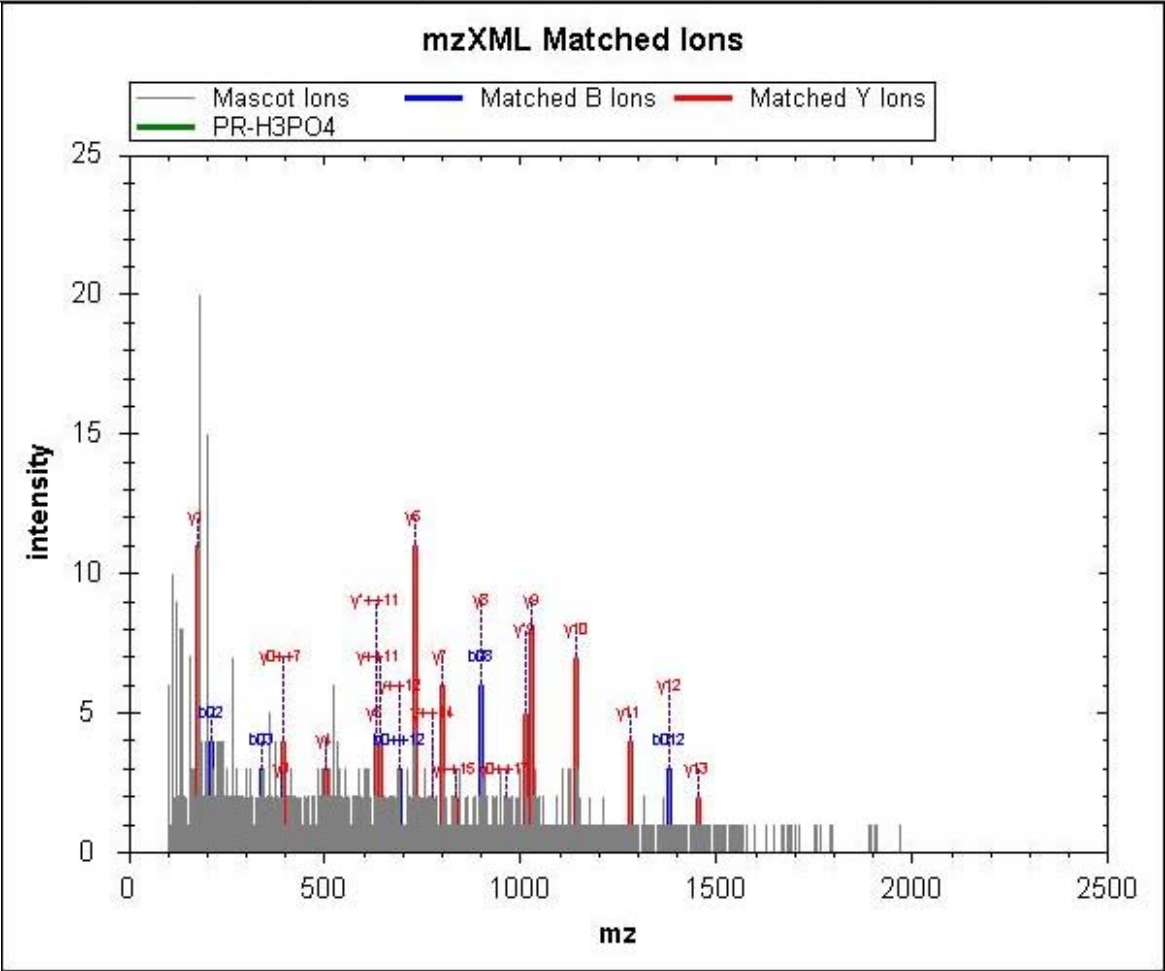

Protein index=946, ACC No:IPI00031679

Peptide index=6494 MS/MS spectrum

Sequence: FLVFDWNWR, m/z:641.8275, charge:+ 2, Modification: , Mod Position:

Score: 32.82, Raw data:WET\_A4\_090615\_02.mzxml, MS/MS Elution time: 89.10751, Scan number:4947, Mass delta:0.011, Rank:1

| No | b      | b++    | b* | b*++ | b0 | b0++ | Seq | y       | y++    | y*      | y*++   | y0      | y0++   | RevNo |
|----|--------|--------|----|------|----|------|-----|---------|--------|---------|--------|---------|--------|-------|
| 1  | 148.08 | 74.54  |    |      |    |      | F   |         |        |         |        |         |        | 9     |
| 2  | 261.16 | 131.08 |    |      |    |      | L   | 1135.57 | 568.29 | 1118.54 | 559.77 | 1117.56 | 559.28 | 8     |
| 3  | 360.23 | 180.62 |    |      |    |      | V   | 1022.48 | 511.75 | 1005.46 | 503.23 | 1004.47 | 502.74 | 7     |

|   |         |        |        |        |         |        |   |        |        |        |        |        |        |   |
|---|---------|--------|--------|--------|---------|--------|---|--------|--------|--------|--------|--------|--------|---|
| 4 | 507.3   | 254.15 |        |        |         |        | F | 923.42 | 462.21 | 906.39 | 453.7  | 905.41 | 453.21 | 6 |
| 5 | 622.32  | 311.67 |        |        | 604.31  | 302.66 | D | 776.35 | 388.68 | 759.32 | 380.16 | 758.34 | 379.67 | 5 |
| 6 | 808.4   | 404.71 |        |        | 790.39  | 395.7  | W | 661.32 | 331.16 | 644.29 | 322.65 |        |        | 4 |
| 7 | 922.45  | 461.73 | 905.42 | 453.21 | 904.44  | 452.72 | N | 475.24 | 238.12 | 458.21 | 229.61 |        |        | 3 |
| 8 | 1108.53 | 554.77 | 1091.5 | 546.25 | 1090.51 | 545.76 | W | 361.2  | 181.1  | 344.17 | 172.59 |        |        | 2 |
| 9 |         |        |        |        |         |        | R | 175.12 | 88.06  | 158.09 | 79.55  |        |        | 1 |

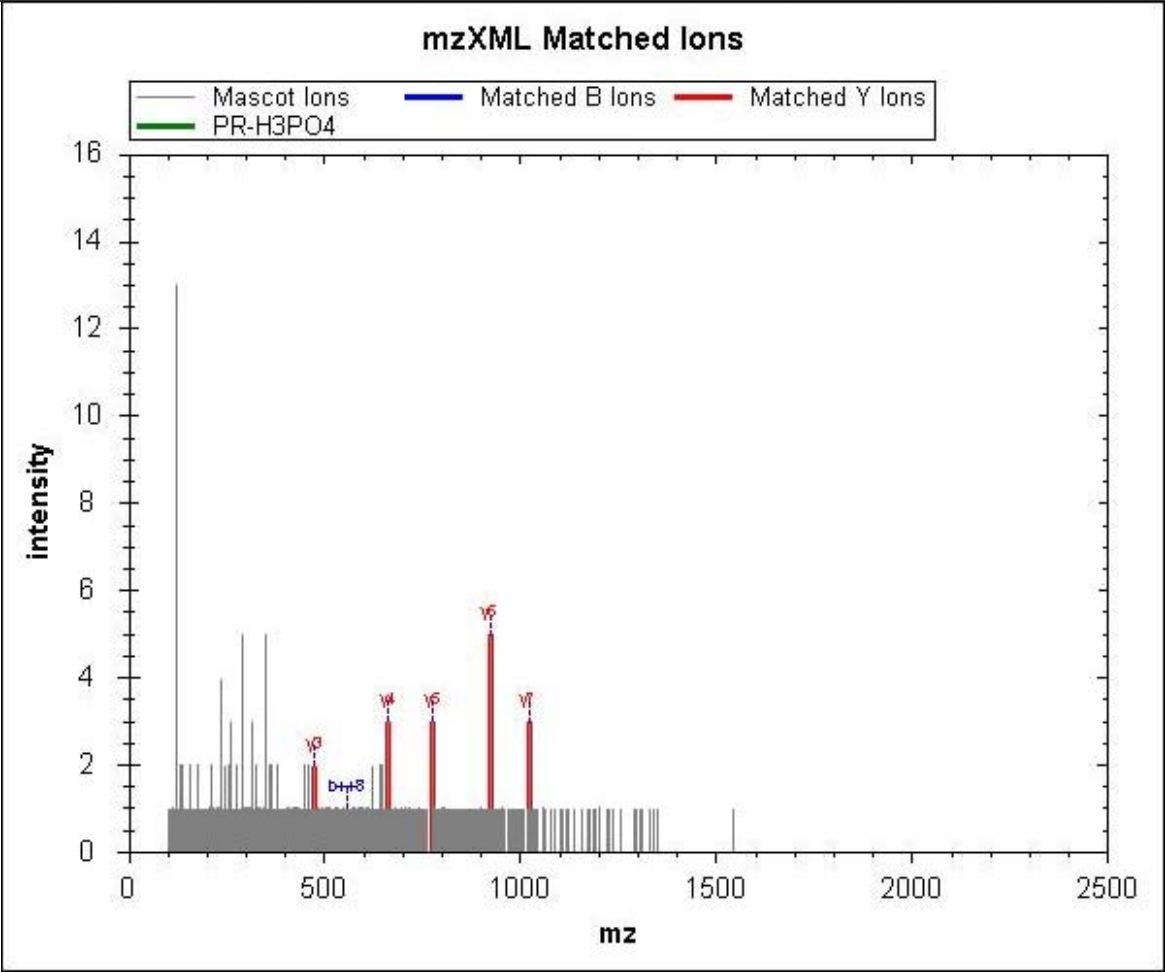

Protein index=947, ACC No:IPI00009630

Peptide index=327 MS/MS spectrum

Sequence: LTPALDSLRCRR, m/z:467.577, charge:+ 3, Modification: , Mod Position:

Score: 43.83, Raw data:WET\_A4\_090615\_02.mzxml, MS/MS Elution time: 18.2705, Scan number:827, Mass delta:-0.0627, Rank:1

| No | b      | b++    | b* | b*++ | b0     | b0++   | Seq | y       | y++    | y*      | y*++   | y0      | y0++   | RevNo |
|----|--------|--------|----|------|--------|--------|-----|---------|--------|---------|--------|---------|--------|-------|
| 1  | 114.09 | 57.55  |    |      |        |        | L   |         |        |         |        |         |        | 12    |
| 2  | 215.14 | 108.07 |    |      | 197.13 | 99.07  | T   | 1287.69 | 644.35 | 1270.67 | 635.84 | 1269.68 | 635.35 | 11    |
| 3  | 312.19 | 156.6  |    |      | 294.18 | 147.59 | P   | 1186.65 | 593.83 | 1169.62 | 585.31 | 1168.64 | 584.82 | 10    |
| 4  | 383.23 | 192.12 |    |      | 365.22 | 183.11 | A   | 1089.59 | 545.3  | 1072.57 | 536.79 | 1071.58 | 536.3  | 9     |
| 5  | 496.31 | 248.66 |    |      | 478.3  | 239.65 | L   | 1018.56 | 509.78 | 1001.53 | 501.27 | 1000.55 | 500.78 | 8     |
| 6  | 611.34 | 306.17 |    |      | 593.33 | 297.17 | D   | 905.47  | 453.24 | 888.45  | 444.73 | 887.46  | 444.24 | 7     |

|    |         |        |         |        |         |        |   |        |        |        |        |        |        |   |
|----|---------|--------|---------|--------|---------|--------|---|--------|--------|--------|--------|--------|--------|---|
| 7  | 698.37  | 349.69 |         |        | 680.36  | 340.68 | S | 790.45 | 395.73 | 773.42 | 387.21 | 772.44 | 386.72 | 6 |
| 8  | 811.46  | 406.23 |         |        | 793.45  | 397.23 | L | 703.41 | 352.21 | 686.39 | 343.7  |        |        | 5 |
| 9  | 967.56  | 484.28 | 950.53  | 475.77 | 949.55  | 475.28 | R | 590.33 | 295.67 | 573.3  | 287.16 |        |        | 4 |
| 10 | 1070.57 | 535.79 | 1053.54 | 527.27 | 1052.56 | 526.78 | C | 434.23 | 217.62 | 417.2  | 209.1  |        |        | 3 |
| 11 | 1226.67 | 613.84 | 1209.64 | 605.32 | 1208.66 | 604.83 | R | 331.22 | 166.11 | 314.19 | 157.6  |        |        | 2 |
| 12 |         |        |         |        |         |        | R | 175.12 | 88.06  | 158.09 | 79.55  |        |        | 1 |

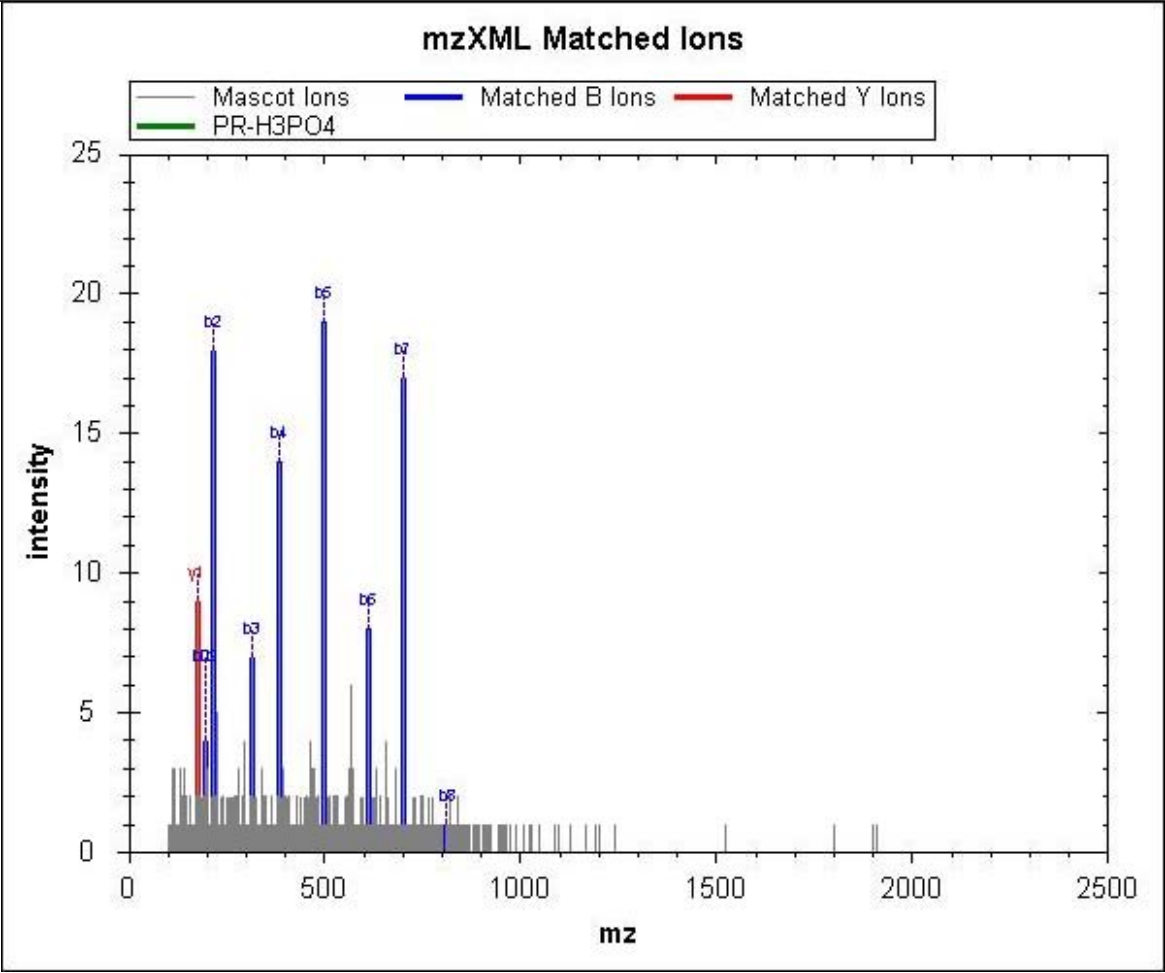

Protein index=949, ACC No:IPI00016832

Peptide index=1765 MS/MS spectrum

Sequence: ETLPAEQDLTTK, m/z:673.34, charge:+ 2, Modification: , Mod Position:

Score: 36.45, Raw data:WET\_A4\_090615\_02.mzxml, MS/MS Elution time: 37.36167, Scan number:1941, Mass delta:-0.0117, Rank:1

| No | b      | b++    | b* | b*++ | b0     | b0++   | Seq | y       | y++    | y*      | y*++   | y0      | y0++   | RevNo |
|----|--------|--------|----|------|--------|--------|-----|---------|--------|---------|--------|---------|--------|-------|
| 1  | 130.05 | 65.53  |    |      | 112.04 | 56.52  | E   |         |        |         |        |         |        | 12    |
| 2  | 231.1  | 116.05 |    |      | 213.09 | 107.05 | T   | 1216.64 | 608.82 | 1199.62 | 600.31 | 1198.63 | 599.82 | 11    |
| 3  | 344.18 | 172.59 |    |      | 326.17 | 163.59 | L   | 1115.59 | 558.3  | 1098.57 | 549.79 | 1097.58 | 549.3  | 10    |
| 4  | 441.23 | 221.12 |    |      | 423.22 | 212.12 | P   | 1002.51 | 501.76 | 985.48  | 493.25 | 984.5   | 492.75 | 9     |
| 5  | 512.27 | 256.64 |    |      | 494.26 | 247.63 | A   | 905.46  | 453.23 | 888.43  | 444.72 | 887.45  | 444.23 | 8     |
| 6  | 641.31 | 321.16 |    |      | 623.3  | 312.16 | E   | 834.42  | 417.71 | 817.39  | 409.2  | 816.41  | 408.71 | 7     |

|    |         |        |         |        |         |        |   |        |        |        |        |        |        |   |
|----|---------|--------|---------|--------|---------|--------|---|--------|--------|--------|--------|--------|--------|---|
| 7  | 769.37  | 385.19 | 752.35  | 376.68 | 751.36  | 376.18 | Q | 705.38 | 353.19 | 688.35 | 344.68 | 687.37 | 344.19 | 6 |
| 8  | 884.4   | 442.7  | 867.37  | 434.19 | 866.39  | 433.7  | D | 577.32 | 289.16 | 560.29 | 280.65 | 559.31 | 280.16 | 5 |
| 9  | 997.48  | 499.25 | 980.46  | 490.73 | 979.47  | 490.24 | L | 462.29 | 231.65 | 445.27 | 223.14 | 444.28 | 222.64 | 4 |
| 10 | 1098.53 | 549.77 | 1081.5  | 541.26 | 1080.52 | 540.76 | T | 349.21 | 175.11 | 332.18 | 166.59 | 331.2  | 166.1  | 3 |
| 11 | 1199.58 | 600.29 | 1182.55 | 591.78 | 1181.57 | 591.29 | T | 248.16 | 124.58 | 231.13 | 116.07 | 230.15 | 115.58 | 2 |
| 12 |         |        |         |        |         |        | K | 147.11 | 74.06  | 130.09 | 65.55  |        |        | 1 |

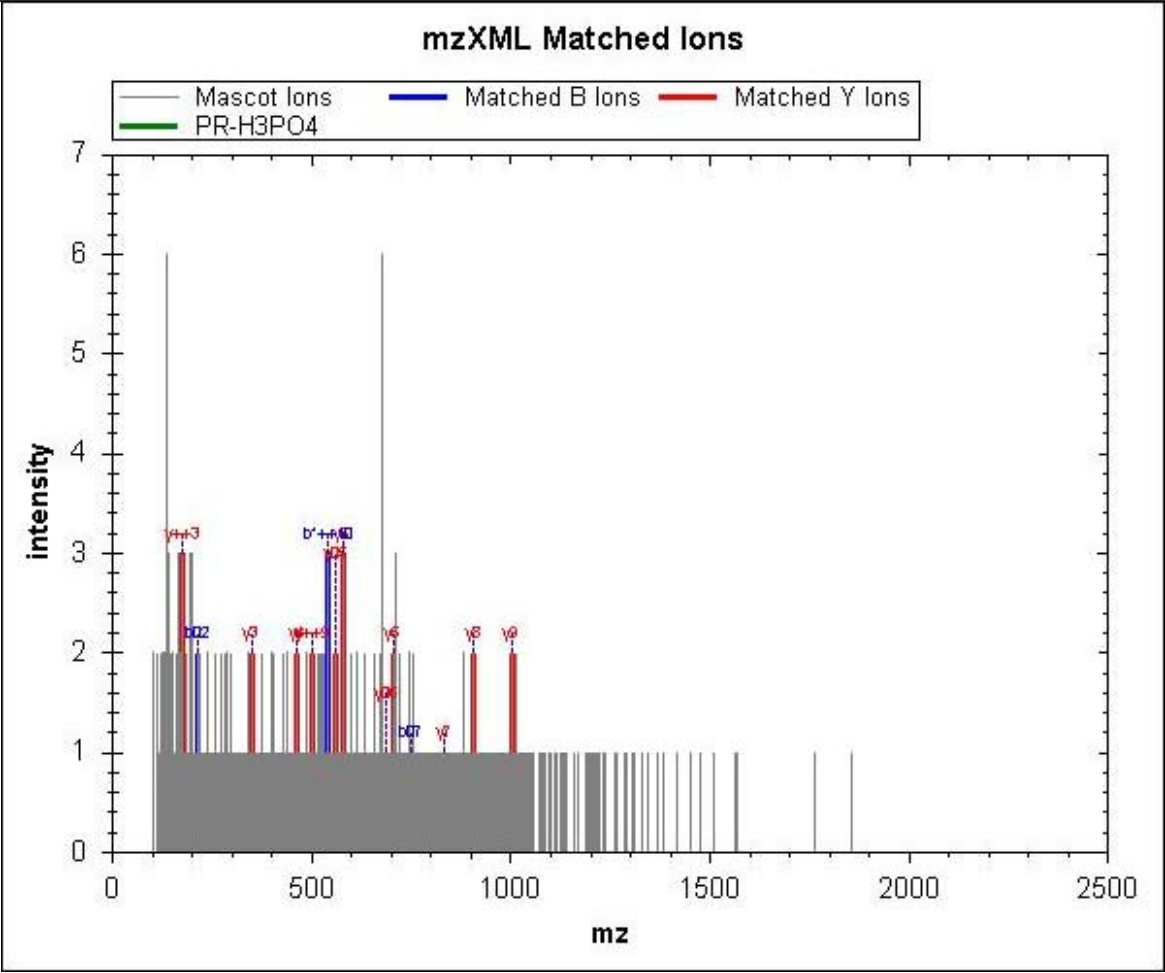

Protein index=951, ACC No:IPI00014938

Peptide index=3192 MS/MS spectrum

Sequence: FGLNVSSISR, m/z:540.291, charge:+ 2, Modification: , Mod Position:

Score: 99.79, Raw data:WET\_B4\_090616\_01.mzxml, MS/MS Elution time: 50.51883, Scan number:2720, Mass delta:0.0035, Rank:1

| No | b      | b++    | b*     | b*++   | b0     | b0++   | Seq | y      | y++    | y*     | y*++   | y0     | y0++   | RevNo |
|----|--------|--------|--------|--------|--------|--------|-----|--------|--------|--------|--------|--------|--------|-------|
| 1  | 148.08 | 74.54  |        |        |        |        | F   |        |        |        |        |        |        | 10    |
| 2  | 205.1  | 103.05 |        |        |        |        | G   | 932.52 | 466.76 | 915.49 | 458.25 | 914.51 | 457.76 | 9     |
| 3  | 318.18 | 159.59 |        |        |        |        | L   | 875.49 | 438.25 | 858.47 | 429.74 | 857.48 | 429.25 | 8     |
| 4  | 432.22 | 216.62 | 415.2  | 208.1  |        |        | N   | 762.41 | 381.71 | 745.38 | 373.2  | 744.4  | 372.7  | 7     |
| 5  | 531.29 | 266.15 | 514.27 | 257.64 |        |        | V   | 648.37 | 324.69 | 631.34 | 316.17 | 630.36 | 315.68 | 6     |
| 6  | 618.32 | 309.67 | 601.3  | 301.15 | 600.31 | 300.66 | S   | 549.3  | 275.15 | 532.27 | 266.64 | 531.29 | 266.15 | 5     |

|    |        |        |        |        |        |        |   |        |        |        |        |        |        |   |
|----|--------|--------|--------|--------|--------|--------|---|--------|--------|--------|--------|--------|--------|---|
| 7  | 705.36 | 353.18 | 688.33 | 344.67 | 687.35 | 344.18 | S | 462.27 | 231.64 | 445.24 | 223.12 | 444.26 | 222.63 | 4 |
| 8  | 818.44 | 409.72 | 801.41 | 401.21 | 800.43 | 400.72 | I | 375.24 | 188.12 | 358.21 | 179.61 | 357.22 | 179.12 | 3 |
| 9  | 905.47 | 453.24 | 888.45 | 444.73 | 887.46 | 444.23 | S | 262.15 | 131.58 | 245.12 | 123.07 | 244.14 | 122.57 | 2 |
| 10 |        |        |        |        |        |        | R | 175.12 | 88.06  | 158.09 | 79.55  |        |        | 1 |

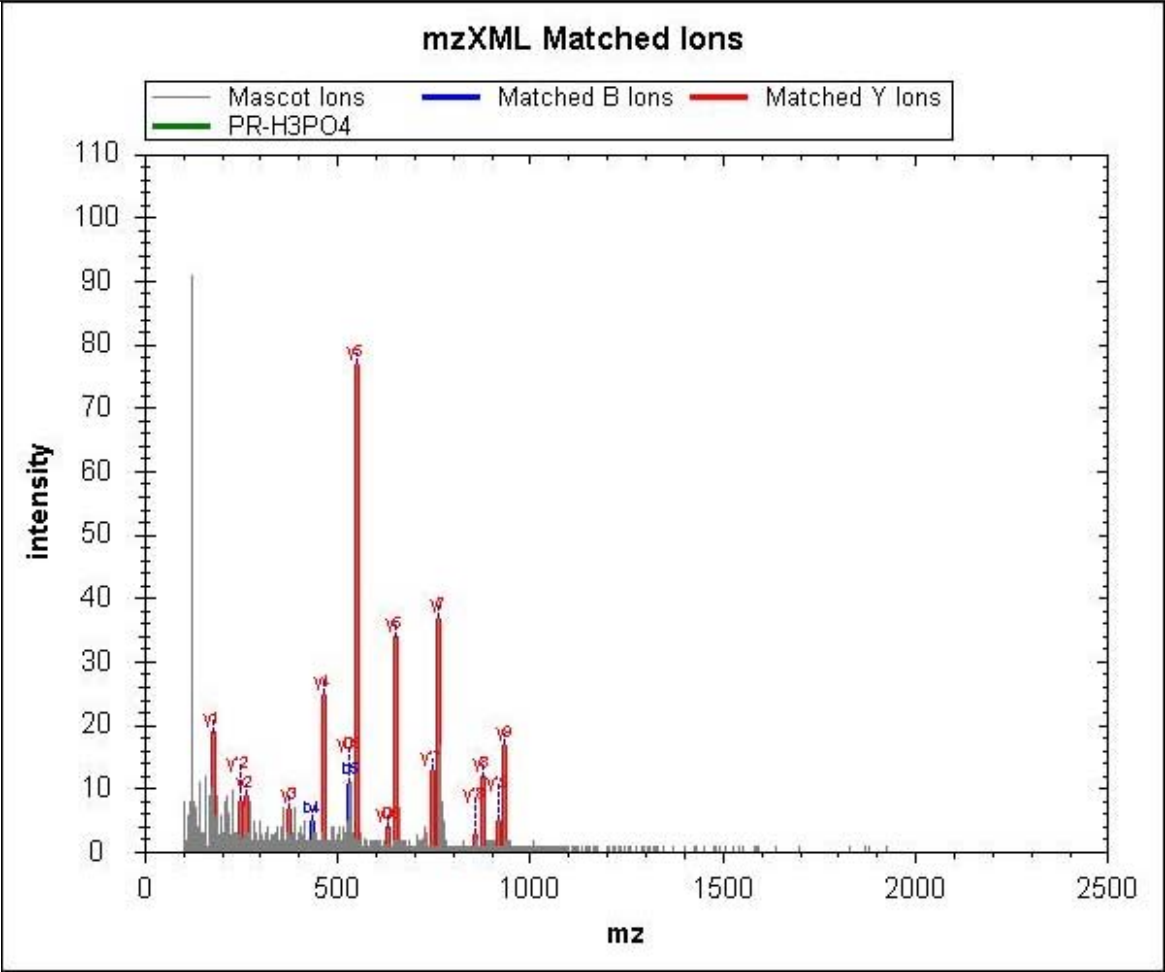

Protein index=953, ACC No:IP100291972

Peptide index=6762 MS/MS spectrum

Sequence: SLKPFDFILDNVGGSTETWAPDFLK, m/z:933.1498, charge:+ 3, Modification: , Mod Position:

Score: 32.01, Raw data:WET\_A4\_090615\_02.mzxml, MS/MS Elution time: 95.69884, Scan number:5330, Mass delta:0.0264, Rank:1

| No | b      | b++    | b*     | b*++   | b0     | b0++   | Seq | y       | y++     | y*      | y*++    | y0      | y0++    | RevNo |
|----|--------|--------|--------|--------|--------|--------|-----|---------|---------|---------|---------|---------|---------|-------|
| 1  | 88.04  | 44.52  |        |        | 70.03  | 35.52  | S   |         |         |         |         |         |         | 25    |
| 2  | 201.12 | 101.07 |        |        | 183.11 | 92.06  | L   | 2710.38 | 1355.69 | 2693.35 | 1347.18 | 2692.37 | 1346.69 | 24    |
| 3  | 329.22 | 165.11 | 312.19 | 156.6  | 311.21 | 156.11 | K   | 2597.29 | 1299.15 | 2580.27 | 1290.64 | 2579.28 | 1290.14 | 23    |
| 4  | 426.27 | 213.64 | 409.24 | 205.13 | 408.26 | 204.63 | P   | 2469.2  | 1235.1  | 2452.17 | 1226.59 | 2451.19 | 1226.1  | 22    |
| 5  | 573.34 | 287.17 | 556.31 | 278.66 | 555.33 | 278.17 | F   | 2372.14 | 1186.58 | 2355.12 | 1178.06 | 2354.13 | 1177.57 | 21    |
| 6  | 688.37 | 344.69 | 671.34 | 336.17 | 670.36 | 335.68 | D   | 2225.08 | 1113.04 | 2208.05 | 1104.53 | 2207.07 | 1104.04 | 20    |
| 7  | 835.43 | 418.22 | 818.41 | 409.71 | 817.42 | 409.22 | F   | 2110.05 | 1055.53 | 2093.02 | 1047.02 | 2092.04 | 1046.52 | 19    |
| 8  | 948.52 | 474.76 | 931.49 | 466.25 | 930.51 | 465.76 | I   | 1962.98 | 981.99  | 1945.95 | 973.48  | 1944.97 | 972.99  | 18    |

|    |         |         |         |         |         |         |   |         |        |         |        |         |        |    |
|----|---------|---------|---------|---------|---------|---------|---|---------|--------|---------|--------|---------|--------|----|
| 9  | 1061.6  | 531.31  | 1044.58 | 522.79  | 1043.59 | 522.3   | L | 1849.9  | 925.45 | 1832.87 | 916.94 | 1831.89 | 916.45 | 17 |
| 10 | 1176.63 | 588.82  | 1159.6  | 580.31  | 1158.62 | 579.81  | D | 1736.81 | 868.91 | 1719.79 | 860.4  | 1718.8  | 859.9  | 16 |
| 11 | 1290.67 | 645.84  | 1273.65 | 637.33  | 1272.66 | 636.83  | N | 1621.79 | 811.4  | 1604.76 | 802.88 | 1603.78 | 802.39 | 15 |
| 12 | 1389.74 | 695.37  | 1372.71 | 686.86  | 1371.73 | 686.37  | V | 1507.74 | 754.38 | 1490.72 | 745.86 | 1489.73 | 745.37 | 14 |
| 13 | 1446.76 | 723.89  | 1429.74 | 715.37  | 1428.75 | 714.88  | G | 1408.67 | 704.84 | 1391.65 | 696.33 | 1390.66 | 695.84 | 13 |
| 14 | 1503.78 | 752.4   | 1486.76 | 743.88  | 1485.77 | 743.39  | G | 1351.65 | 676.33 | 1334.63 | 667.82 | 1333.64 | 667.32 | 12 |
| 15 | 1590.82 | 795.91  | 1573.79 | 787.4   | 1572.81 | 786.91  | S | 1294.63 | 647.82 | 1277.6  | 639.31 | 1276.62 | 638.81 | 11 |
| 16 | 1691.86 | 846.44  | 1674.84 | 837.92  | 1673.85 | 837.43  | T | 1207.6  | 604.3  | 1190.57 | 595.79 | 1189.59 | 595.3  | 10 |
| 17 | 1820.91 | 910.96  | 1803.88 | 902.44  | 1802.9  | 901.95  | E | 1106.55 | 553.78 | 1089.53 | 545.27 | 1088.54 | 544.77 | 9  |
| 18 | 1921.95 | 961.48  | 1904.93 | 952.97  | 1903.94 | 952.48  | T | 977.51  | 489.26 | 960.48  | 480.74 | 959.5   | 480.25 | 8  |
| 19 | 2108.03 | 1054.52 | 2091.01 | 1046.01 | 2090.02 | 1045.52 | W | 876.46  | 438.73 | 859.43  | 430.22 | 858.45  | 429.73 | 7  |
| 20 | 2179.07 | 1090.04 | 2162.04 | 1081.53 | 2161.06 | 1081.03 | A | 690.38  | 345.69 | 673.36  | 337.18 | 672.37  | 336.69 | 6  |
| 21 | 2276.12 | 1138.57 | 2259.1  | 1130.05 | 2258.11 | 1129.56 | P | 619.34  | 310.18 | 602.32  | 301.66 | 601.33  | 301.17 | 5  |
| 22 | 2391.15 | 1196.08 | 2374.12 | 1187.57 | 2373.14 | 1187.07 | D | 522.29  | 261.65 | 505.27  | 253.14 | 504.28  | 252.64 | 4  |
| 23 | 2538.22 | 1269.61 | 2521.19 | 1261.1  | 2520.21 | 1260.61 | F | 407.27  | 204.14 | 390.24  | 195.62 |         |        | 3  |
| 24 | 2651.3  | 1326.16 | 2634.28 | 1317.64 | 2633.29 | 1317.15 | L | 260.2   | 130.6  | 243.17  | 122.09 |         |        | 2  |
| 25 |         |         |         |         |         |         | K | 147.11  | 74.06  | 130.09  | 65.55  |         |        | 1  |

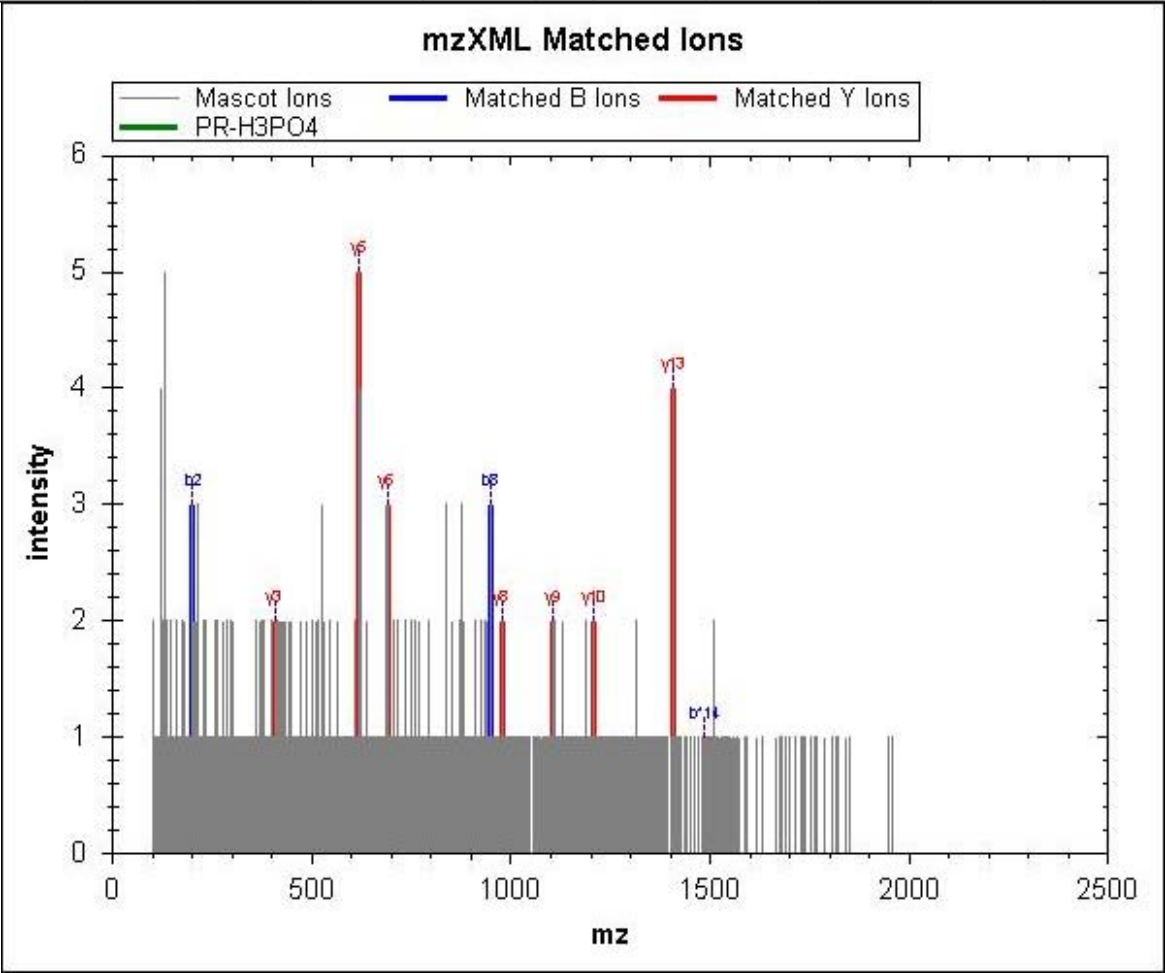

Protein index=959, ACC No:IPI00060287

Peptide index=2880 MS/MS spectrum

Sequence: IISVNEDVTLR, m/z:629.8475, charge:+ 2, Modification: , Mod Position:

Score: 61.61, Raw data:WET\_A4\_090615\_02.mzxml, MS/MS Elution time: 47.98217, Scan number:2558, Mass delta:-0.0123, Rank:1

| No | b       | b++    | b*      | b*++   | b0      | b0++   | Seq | y       | y++    | y*      | y*++   | y0      | y0++   | RevNo |
|----|---------|--------|---------|--------|---------|--------|-----|---------|--------|---------|--------|---------|--------|-------|
| 1  | 114.09  | 57.55  |         |        |         |        | I   |         |        |         |        |         |        | 11    |
| 2  | 227.18  | 114.09 |         |        |         |        | I   | 1145.62 | 573.31 | 1128.59 | 564.8  | 1127.61 | 564.31 | 10    |
| 3  | 314.21  | 157.61 |         |        | 296.2   | 148.6  | S   | 1032.53 | 516.77 | 1015.51 | 508.26 | 1014.52 | 507.76 | 9     |
| 4  | 413.28  | 207.14 |         |        | 395.27  | 198.14 | V   | 945.5   | 473.25 | 928.47  | 464.74 | 927.49  | 464.25 | 8     |
| 5  | 527.32  | 264.16 | 510.29  | 255.65 | 509.31  | 255.16 | N   | 846.43  | 423.72 | 829.4   | 415.21 | 828.42  | 414.71 | 7     |
| 6  | 656.36  | 328.68 | 639.33  | 320.17 | 638.35  | 319.68 | E   | 732.39  | 366.7  | 715.36  | 358.18 | 714.38  | 357.69 | 6     |
| 7  | 771.39  | 386.2  | 754.36  | 377.68 | 753.38  | 377.19 | D   | 603.35  | 302.18 | 586.32  | 293.66 | 585.34  | 293.17 | 5     |
| 8  | 870.46  | 435.73 | 853.43  | 427.22 | 852.45  | 426.73 | V   | 488.32  | 244.66 | 471.29  | 236.15 | 470.31  | 235.66 | 4     |
| 9  | 971.5   | 486.26 | 954.48  | 477.74 | 953.49  | 477.25 | T   | 389.25  | 195.13 | 372.22  | 186.62 | 371.24  | 186.12 | 3     |
| 10 | 1084.59 | 542.8  | 1067.56 | 534.28 | 1066.58 | 533.79 | L   | 288.2   | 144.61 | 271.18  | 136.09 |         |        | 2     |
| 11 |         |        |         |        |         |        | R   | 175.12  | 88.06  | 158.09  | 79.55  |         |        | 1     |

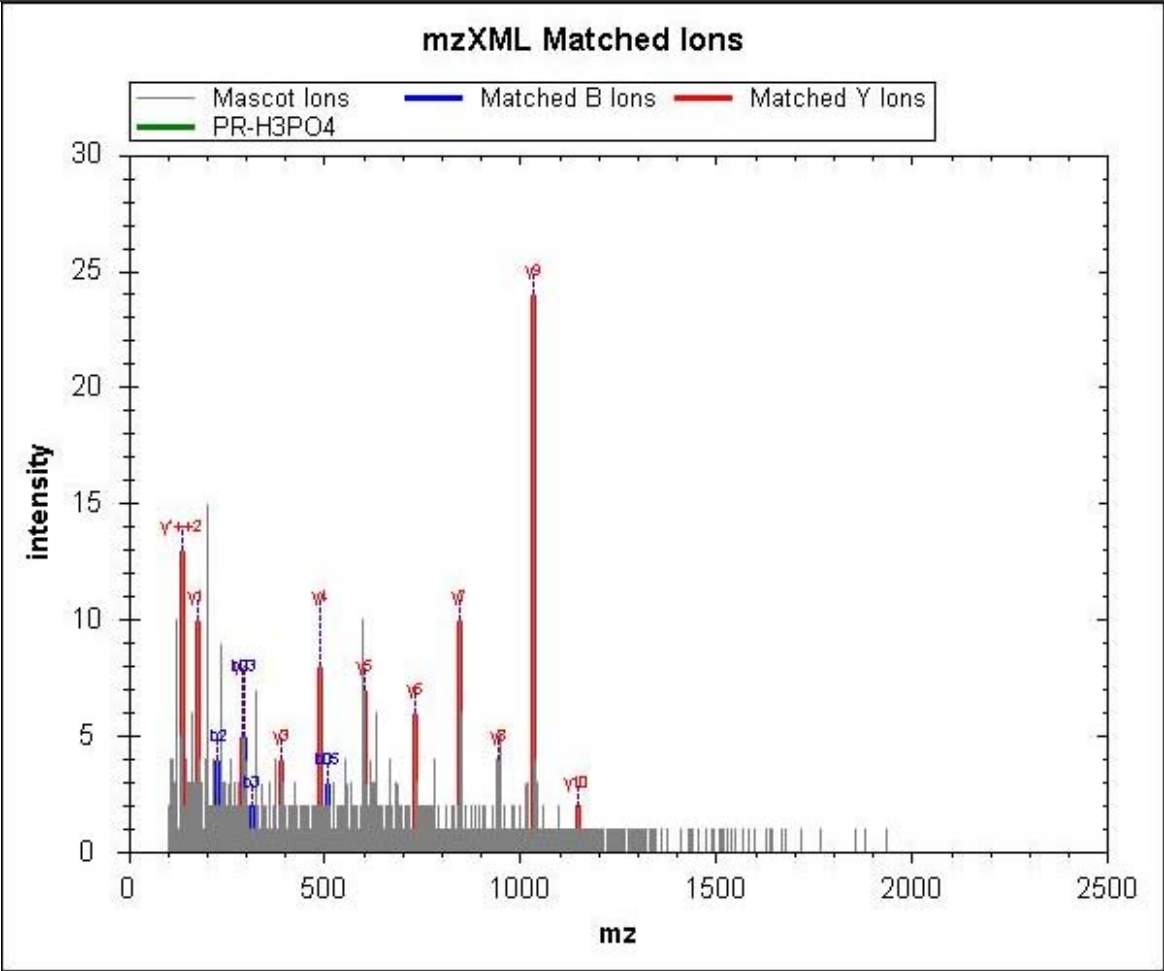

Protein index=962, ACC No:IPI00786982

Peptide index=1887 MS/MS spectrum

Sequence: TLGDTGFMPPDK, m/z:647.8029, charge:+ 2, Modification: Oxidation (M), Mod Position:

0.000000010000.0

Score: 56.85, Raw data:WET\_A4\_090615\_03.mzxml, MS/MS Elution time: 38.70867, Scan number:2019, Mass delta:0, Rank:1

| No | b       | b++    | b0      | b0++   | Seq | y       | y++    | y*      | y*++   | y0      | y0++   | RevNo |
|----|---------|--------|---------|--------|-----|---------|--------|---------|--------|---------|--------|-------|
| 1  | 102.05  | 51.53  | 84.04   | 42.53  | T   |         |        |         |        |         |        | 12    |
| 2  | 215.14  | 108.07 | 197.13  | 99.07  | L   | 1129.55 | 565.28 | 1112.53 | 556.77 | 1111.54 | 556.27 | 11    |
| 3  | 272.16  | 136.58 | 254.15  | 127.58 | G   | 1016.47 | 508.74 | 999.44  | 500.22 | 998.46  | 499.73 | 10    |
| 4  | 387.19  | 194.1  | 369.18  | 185.09 | D   | 959.45  | 480.23 | 942.42  | 471.71 | 941.44  | 471.22 | 9     |
| 5  | 488.24  | 244.62 | 470.22  | 235.62 | T   | 844.42  | 422.71 | 827.39  | 414.2  | 826.41  | 413.71 | 8     |
| 6  | 545.26  | 273.13 | 527.25  | 264.13 | G   | 743.37  | 372.19 | 726.35  | 363.68 | 725.36  | 363.18 | 7     |
| 7  | 692.32  | 346.67 | 674.31  | 337.66 | F   | 686.35  | 343.68 | 669.32  | 335.17 | 668.34  | 334.67 | 6     |
| 8  | 775.36  | 388.18 | 757.35  | 379.18 | M   | 539.28  | 270.14 | 522.26  | 261.63 | 521.27  | 261.14 | 5     |
| 9  | 872.41  | 436.71 | 854.4   | 427.71 | P   | 456.25  | 228.63 | 439.22  | 220.11 | 438.23  | 219.62 | 4     |
| 10 | 969.47  | 485.24 | 951.46  | 476.23 | P   | 359.19  | 180.1  | 342.17  | 171.59 | 341.18  | 171.09 | 3     |
| 11 | 1084.49 | 542.75 | 1066.48 | 533.75 | D   | 262.14  | 131.57 | 245.11  | 123.06 | 244.13  | 122.57 | 2     |
| 12 |         |        |         |        | K   | 147.11  | 74.06  | 130.09  | 65.55  |         |        | 1     |

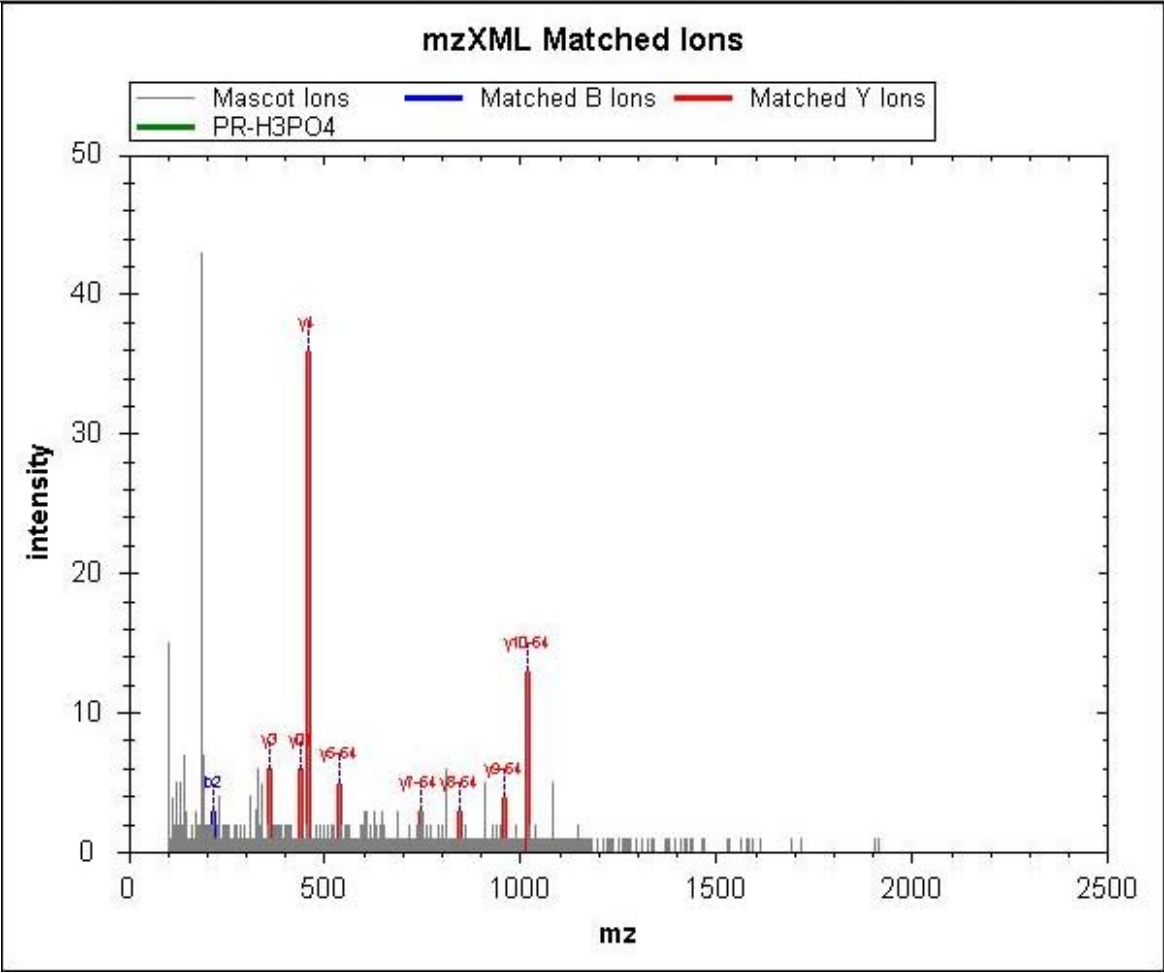

Protein index=963, ACC No:IP100030257

Peptide index=5852 MS/MS spectrum

Sequence: AFLLFPTIER, m/z:603.8513, charge:+ 2, Modification: , Mod Position:

Score: 57.26, Raw data:WET\_B4\_090616\_02.mzxml, MS/MS Elution time: 78.905, Scan number:4353, Mass delta:0.003, Rank:1

| No | b       | b++    | b0      | b0++   | Seq | y       | y++    | y*      | y*++   | y0      | y0++   | RevNo |
|----|---------|--------|---------|--------|-----|---------|--------|---------|--------|---------|--------|-------|
| 1  | 72.04   | 36.53  |         |        | A   |         |        |         |        |         |        | 10    |
| 2  | 219.11  | 110.06 |         |        | F   | 1135.65 | 568.33 | 1118.62 | 559.82 | 1117.64 | 559.32 | 9     |
| 3  | 332.2   | 166.6  |         |        | L   | 988.58  | 494.79 | 971.56  | 486.28 | 970.57  | 485.79 | 8     |
| 4  | 445.28  | 223.14 |         |        | L   | 875.5   | 438.25 | 858.47  | 429.74 | 857.49  | 429.25 | 7     |
| 5  | 592.35  | 296.68 |         |        | F   | 762.41  | 381.71 | 745.39  | 373.2  | 744.4   | 372.71 | 6     |
| 6  | 689.4   | 345.2  |         |        | P   | 615.35  | 308.18 | 598.32  | 299.66 | 597.34  | 299.17 | 5     |
| 7  | 790.45  | 395.73 | 772.44  | 386.72 | T   | 518.29  | 259.65 | 501.27  | 251.14 | 500.28  | 250.64 | 4     |
| 8  | 903.53  | 452.27 | 885.52  | 443.27 | I   | 417.25  | 209.13 | 400.22  | 200.61 | 399.24  | 200.12 | 3     |
| 9  | 1032.58 | 516.79 | 1014.57 | 507.79 | E   | 304.16  | 152.58 | 287.13  | 144.07 | 286.15  | 143.58 | 2     |
| 10 |         |        |         |        | R   | 175.12  | 88.06  | 158.09  | 79.55  |         |        | 1     |

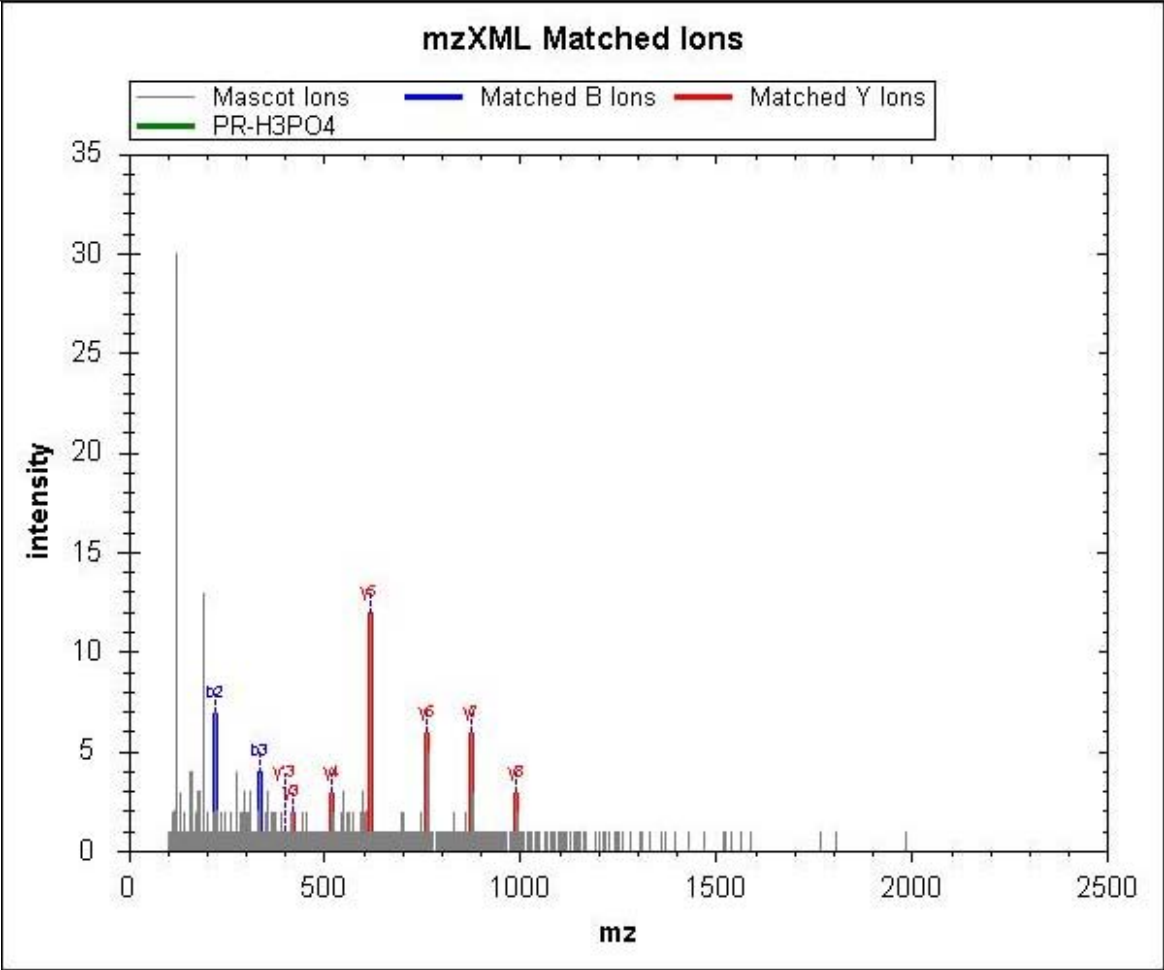

Protein index=965, ACC No:IPI00025050

Peptide index=6943 MS/MS spectrum

Sequence: VFSGIQPTGILHLGNYLGAIESWVR, m/z:909.827, charge:+ 3, Modification: , Mod Position:

Score: 63.47, Raw data:WET\_B4\_090616\_02.mzxml, MS/MS Elution time: 101.1692, Scan number:5655, Mass delta:0.0089, Rank:1

| No | b       | b++     | b*      | b*++    | b0      | b0++    | Seq | y       | y++     | y*      | y*++    | y0      | y0++    | RevNo |
|----|---------|---------|---------|---------|---------|---------|-----|---------|---------|---------|---------|---------|---------|-------|
| 1  | 100.08  | 50.54   |         |         |         |         | V   |         |         |         |         |         |         | 25    |
| 2  | 247.14  | 124.08  |         |         |         |         | F   | 2628.39 | 1314.7  | 2611.37 | 1306.19 | 2610.38 | 1305.7  | 24    |
| 3  | 334.18  | 167.59  |         |         | 316.17  | 158.59  | S   | 2481.33 | 1241.17 | 2464.3  | 1232.65 | 2463.31 | 1232.16 | 23    |
| 4  | 391.2   | 196.1   |         |         | 373.19  | 187.1   | G   | 2394.29 | 1197.65 | 2377.27 | 1189.14 | 2376.28 | 1188.65 | 22    |
| 5  | 504.28  | 252.64  |         |         | 486.27  | 243.64  | I   | 2337.27 | 1169.14 | 2320.25 | 1160.63 | 2319.26 | 1160.13 | 21    |
| 6  | 632.34  | 316.67  | 615.31  | 308.16  | 614.33  | 307.67  | Q   | 2224.19 | 1112.6  | 2207.16 | 1104.08 | 2206.18 | 1103.59 | 20    |
| 7  | 729.39  | 365.2   | 712.37  | 356.69  | 711.38  | 356.19  | P   | 2096.13 | 1048.57 | 2079.1  | 1040.05 | 2078.12 | 1039.56 | 19    |
| 8  | 830.44  | 415.72  | 813.41  | 407.21  | 812.43  | 406.72  | T   | 1999.08 | 1000.04 | 1982.05 | 991.53  | 1981.07 | 991.04  | 18    |
| 9  | 887.46  | 444.23  | 870.44  | 435.72  | 869.45  | 435.23  | G   | 1898.03 | 949.52  | 1881    | 941     | 1880.02 | 940.51  | 17    |
| 10 | 1000.55 | 500.78  | 983.52  | 492.26  | 982.54  | 491.77  | I   | 1841.01 | 921.01  | 1823.98 | 912.49  | 1823    | 912     | 16    |
| 11 | 1113.63 | 557.32  | 1096.6  | 548.81  | 1095.62 | 548.31  | L   | 1727.92 | 864.47  | 1710.9  | 855.95  | 1709.91 | 855.46  | 15    |
| 12 | 1250.69 | 625.85  | 1233.66 | 617.34  | 1232.68 | 616.84  | H   | 1614.84 | 807.92  | 1597.81 | 799.41  | 1596.83 | 798.92  | 14    |
| 13 | 1363.77 | 682.39  | 1346.75 | 673.88  | 1345.76 | 673.39  | L   | 1477.78 | 739.39  | 1460.75 | 730.88  | 1459.77 | 730.39  | 13    |
| 14 | 1420.79 | 710.9   | 1403.77 | 702.39  | 1402.78 | 701.9   | G   | 1364.7  | 682.85  | 1347.67 | 674.34  | 1346.69 | 673.85  | 12    |
| 15 | 1534.84 | 767.92  | 1517.81 | 759.41  | 1516.83 | 758.92  | N   | 1307.67 | 654.34  | 1290.65 | 645.83  | 1289.66 | 645.34  | 11    |
| 16 | 1697.9  | 849.45  | 1680.87 | 840.94  | 1679.89 | 840.45  | Y   | 1193.63 | 597.32  | 1176.6  | 588.81  | 1175.62 | 588.31  | 10    |
| 17 | 1810.99 | 906     | 1793.96 | 897.48  | 1792.97 | 896.99  | L   | 1030.57 | 515.79  | 1013.54 | 507.27  | 1012.56 | 506.78  | 9     |
| 18 | 1868.01 | 934.51  | 1850.98 | 925.99  | 1850    | 925.5   | G   | 917.48  | 459.25  | 900.46  | 450.73  | 899.47  | 450.24  | 8     |
| 19 | 1939.04 | 970.03  | 1922.02 | 961.51  | 1921.03 | 961.02  | A   | 860.46  | 430.73  | 843.44  | 422.22  | 842.45  | 421.73  | 7     |
| 20 | 2052.13 | 1026.57 | 2035.1  | 1018.05 | 2034.12 | 1017.56 | I   | 789.43  | 395.22  | 772.4   | 386.7   | 771.41  | 386.21  | 6     |
| 21 | 2181.17 | 1091.09 | 2164.14 | 1082.58 | 2163.16 | 1082.08 | E   | 676.34  | 338.67  | 659.31  | 330.16  | 658.33  | 329.67  | 5     |
| 22 | 2268.2  | 1134.6  | 2251.18 | 1126.09 | 2250.19 | 1125.6  | S   | 547.3   | 274.15  | 530.27  | 265.64  | 529.29  | 265.15  | 4     |
| 23 | 2454.28 | 1227.64 | 2437.26 | 1219.13 | 2436.27 | 1218.64 | W   | 460.27  | 230.64  | 443.24  | 222.12  |         |         | 3     |
| 24 | 2553.35 | 1277.18 | 2536.32 | 1268.67 | 2535.34 | 1268.17 | V   | 274.19  | 137.6   | 257.16  | 129.08  |         |         | 2     |
| 25 |         |         |         |         |         |         | R   | 175.12  | 88.06   | 158.09  | 79.55   |         |         | 1     |

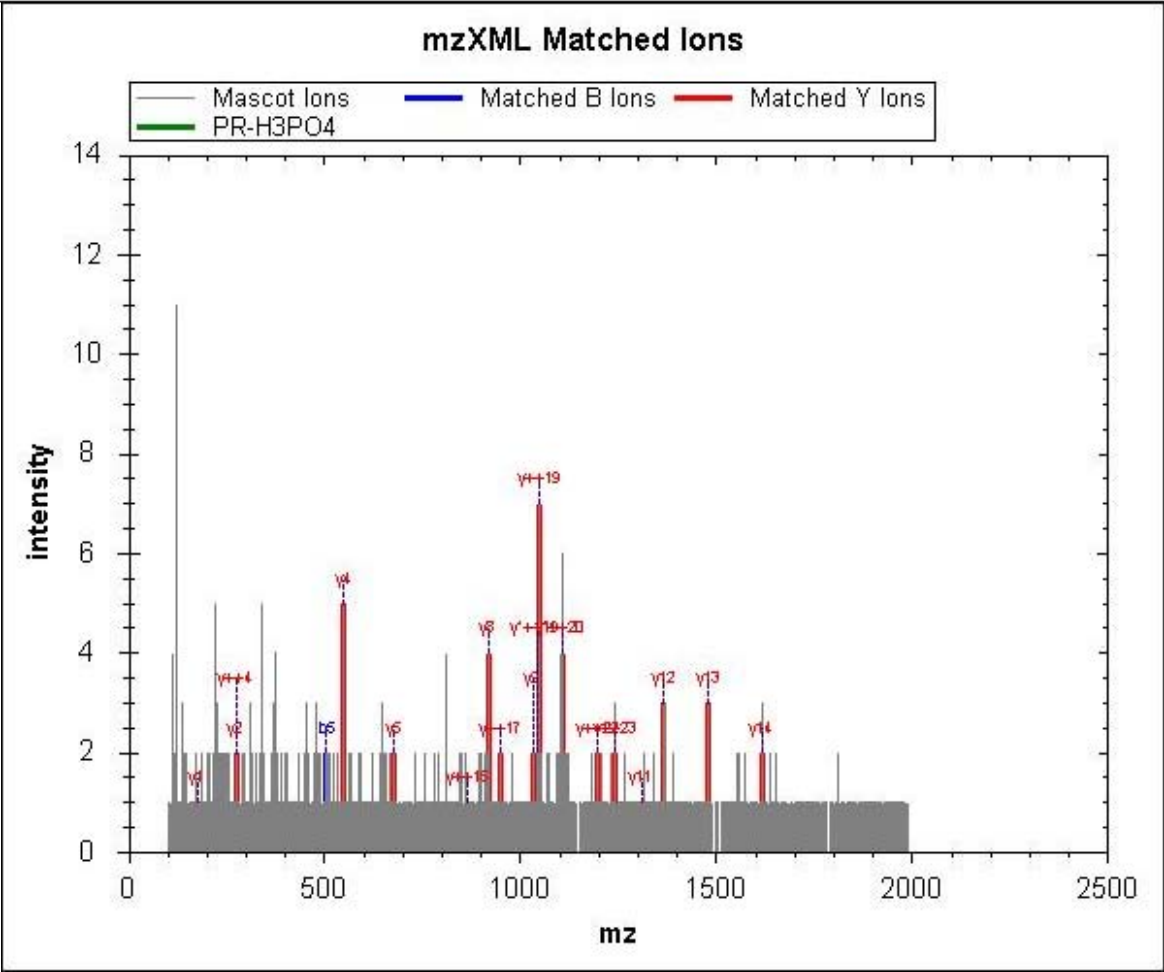

Protein index=967, ACC No:IPI00012795

Peptide index=2587 MS/MS spectrum

Sequence: GHFGPINSVAFHPDGK, m/z:560.6103, charge:+ 3, Modification: , Mod Position:

Score: 64.49, Raw data:WET\_A4\_090615\_03.mzxml, MS/MS Elution time: 45.4425, Scan number:2410, Mass delta:-0.0126, Rank:1

| No | b       | b++    | b*      | b*++   | b0      | b0++   | Seq | y       | y++    | y*      | y*++   | y0      | y0++   | RevNo |
|----|---------|--------|---------|--------|---------|--------|-----|---------|--------|---------|--------|---------|--------|-------|
| 1  | 58.03   | 29.52  |         |        |         |        | G   |         |        |         |        |         |        | 16    |
| 2  | 195.09  | 98.05  |         |        |         |        | H   | 1622.81 | 811.91 | 1605.78 | 803.39 | 1604.8  | 802.9  | 15    |
| 3  | 342.16  | 171.58 |         |        |         |        | F   | 1485.75 | 743.38 | 1468.72 | 734.86 | 1467.74 | 734.37 | 14    |
| 4  | 399.18  | 200.09 |         |        |         |        | G   | 1338.68 | 669.84 | 1321.65 | 661.33 | 1320.67 | 660.84 | 13    |
| 5  | 496.23  | 248.62 |         |        |         |        | P   | 1281.66 | 641.33 | 1264.63 | 632.82 | 1263.65 | 632.33 | 12    |
| 6  | 609.31  | 305.16 |         |        |         |        | I   | 1184.61 | 592.81 | 1167.58 | 584.29 | 1166.6  | 583.8  | 11    |
| 7  | 723.36  | 362.18 | 706.33  | 353.67 |         |        | N   | 1071.52 | 536.26 | 1054.5  | 527.75 | 1053.51 | 527.26 | 10    |
| 8  | 810.39  | 405.7  | 793.36  | 397.18 | 792.38  | 396.69 | S   | 957.48  | 479.24 | 940.45  | 470.73 | 939.47  | 470.24 | 9     |
| 9  | 909.46  | 455.23 | 892.43  | 446.72 | 891.45  | 446.23 | V   | 870.45  | 435.73 | 853.42  | 427.21 | 852.44  | 426.72 | 8     |
| 10 | 980.49  | 490.75 | 963.47  | 482.24 | 962.48  | 481.75 | A   | 771.38  | 386.19 | 754.35  | 377.68 | 753.37  | 377.19 | 7     |
| 11 | 1127.56 | 564.29 | 1110.54 | 555.77 | 1109.55 | 555.28 | F   | 700.34  | 350.67 | 683.31  | 342.16 | 682.33  | 341.67 | 6     |
| 12 | 1264.62 | 632.81 | 1247.6  | 624.3  | 1246.61 | 623.81 | H   | 553.27  | 277.14 | 536.25  | 268.63 | 535.26  | 268.13 | 5     |

|    |         |        |         |        |         |        |   |        |        |        |        |        |        |   |
|----|---------|--------|---------|--------|---------|--------|---|--------|--------|--------|--------|--------|--------|---|
| 13 | 1361.67 | 681.34 | 1344.65 | 672.83 | 1343.66 | 672.34 | P | 416.21 | 208.61 | 399.19 | 200.1  | 398.2  | 199.61 | 4 |
| 14 | 1476.7  | 738.85 | 1459.68 | 730.34 | 1458.69 | 729.85 | D | 319.16 | 160.08 | 302.13 | 151.57 | 301.15 | 151.08 | 3 |
| 15 | 1533.72 | 767.37 | 1516.7  | 758.85 | 1515.71 | 758.36 | G | 204.13 | 102.57 | 187.11 | 94.06  |        |        | 2 |
| 16 |         |        |         |        |         |        | K | 147.11 | 74.06  | 130.09 | 65.55  |        |        | 1 |

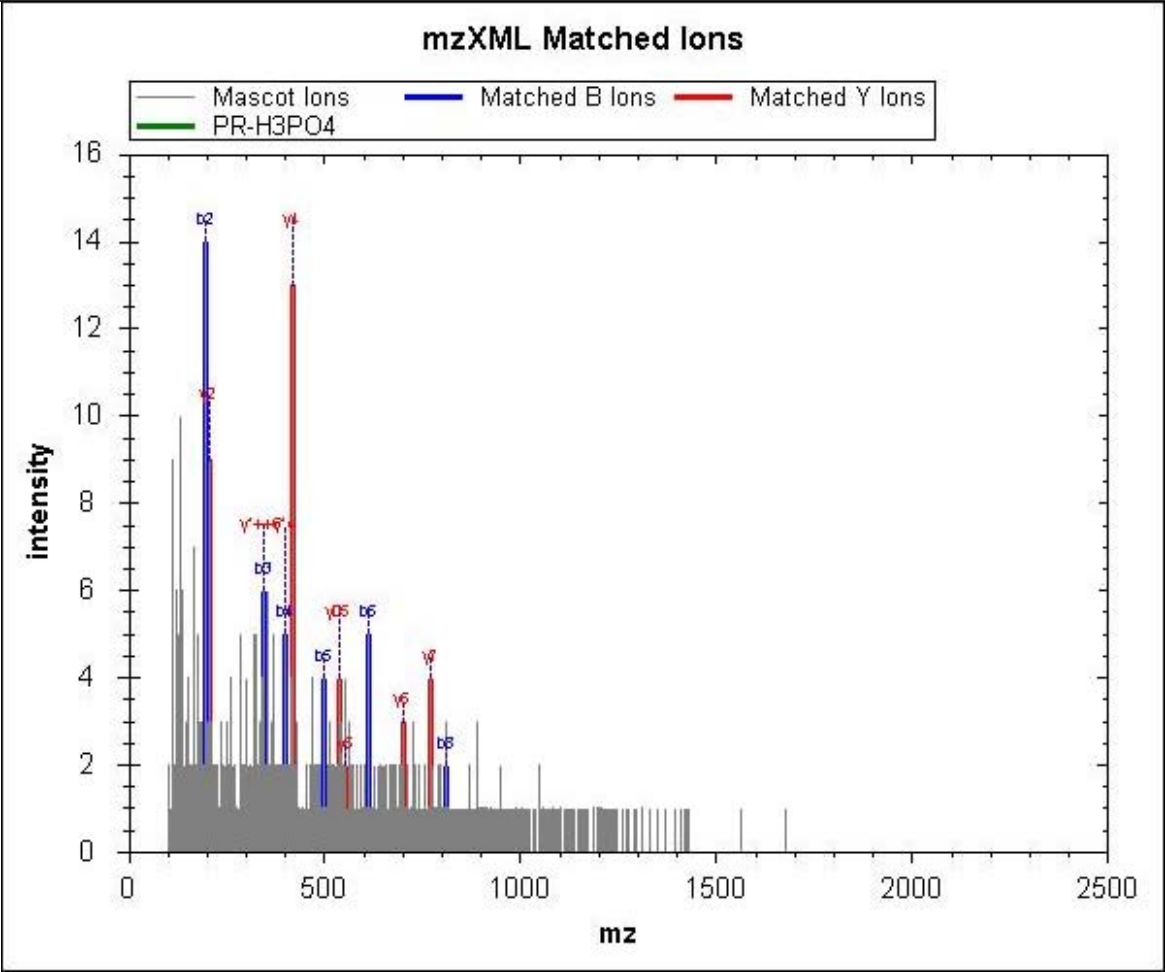

Protein index=970, ACC No:IPI00007814

Peptide index=6394 MS/MS spectrum

Sequence: VGTLDVLVGLSDELA~~K~~, m/z:814.9609, charge:+ 2, Modification: , Mod Position:

Score: 51.99, Raw data:WET\_B4\_090616\_02.mzxml, MS/MS Elution time: 87.35334, Scan number:4844, Mass delta:-0.004, Rank:1

| No | b      | b++    | b0     | b0++   | Seq | y       | y++    | y*      | y*++   | y0      | y0++   | RevNo |
|----|--------|--------|--------|--------|-----|---------|--------|---------|--------|---------|--------|-------|
| 1  | 100.08 | 50.54  |        |        | V   |         |        |         |        |         |        | 16    |
| 2  | 157.1  | 79.05  |        |        | G   | 1529.84 | 765.42 | 1512.82 | 756.91 | 1511.83 | 756.42 | 15    |
| 3  | 258.14 | 129.58 | 240.13 | 120.57 | T   | 1472.82 | 736.91 | 1455.79 | 728.4  | 1454.81 | 727.91 | 14    |
| 4  | 371.23 | 186.12 | 353.22 | 177.11 | L   | 1371.77 | 686.39 | 1354.75 | 677.88 | 1353.76 | 677.38 | 13    |
| 5  | 486.26 | 243.63 | 468.25 | 234.63 | D   | 1258.69 | 629.85 | 1241.66 | 621.33 | 1240.68 | 620.84 | 12    |
| 6  | 585.32 | 293.17 | 567.31 | 284.16 | V   | 1143.66 | 572.33 | 1126.64 | 563.82 | 1125.65 | 563.33 | 11    |
| 7  | 698.41 | 349.71 | 680.4  | 340.7  | L   | 1044.59 | 522.8  | 1027.57 | 514.29 | 1026.58 | 513.8  | 10    |
| 8  | 797.48 | 399.24 | 779.47 | 390.24 | V   | 931.51  | 466.26 | 914.48  | 457.75 | 913.5   | 457.25 | 9     |

|    |         |        |         |        |   |        |        |        |        |        |        |   |
|----|---------|--------|---------|--------|---|--------|--------|--------|--------|--------|--------|---|
| 9  | 854.5   | 427.75 | 836.49  | 418.75 | G | 832.44 | 416.72 | 815.41 | 408.21 | 814.43 | 407.72 | 8 |
| 10 | 967.58  | 484.29 | 949.57  | 475.29 | L | 775.42 | 388.21 | 758.39 | 379.7  | 757.41 | 379.21 | 7 |
| 11 | 1054.61 | 527.81 | 1036.6  | 518.81 | S | 662.34 | 331.67 | 645.31 | 323.16 | 644.32 | 322.67 | 6 |
| 12 | 1169.64 | 585.32 | 1151.63 | 576.32 | D | 575.3  | 288.16 | 558.28 | 279.64 | 557.29 | 279.15 | 5 |
| 13 | 1298.68 | 649.85 | 1280.67 | 640.84 | E | 460.28 | 230.64 | 443.25 | 222.13 | 442.27 | 221.64 | 4 |
| 14 | 1411.77 | 706.39 | 1393.76 | 697.38 | L | 331.23 | 166.12 | 314.21 | 157.61 |        |        | 3 |
| 15 | 1482.81 | 741.91 | 1464.79 | 732.9  | A | 218.15 | 109.58 | 201.12 | 101.07 |        |        | 2 |
| 16 |         |        |         |        | K | 147.11 | 74.06  | 130.09 | 65.55  |        |        | 1 |

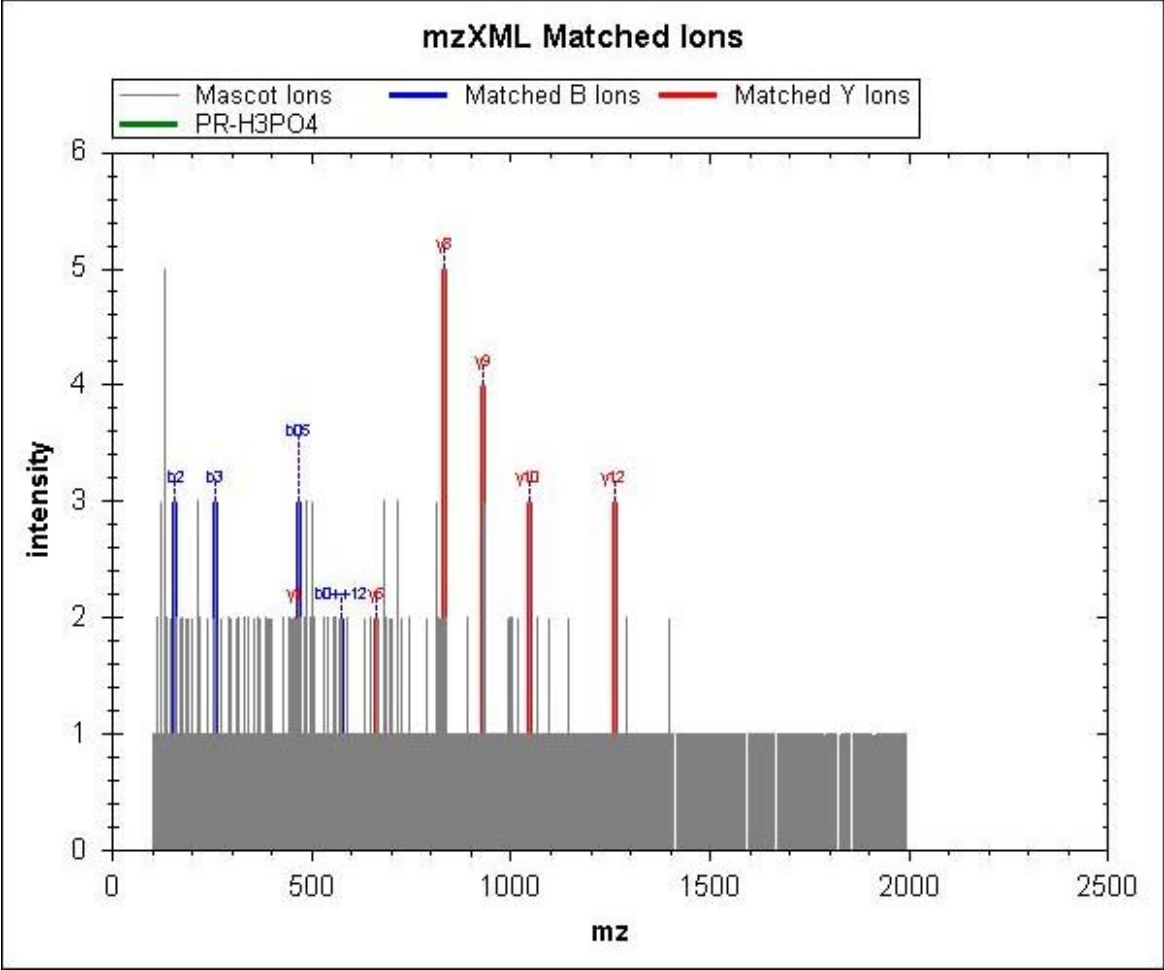

Protein index=971, ACC No:IP100219616

Peptide index=6915 MS/MS spectrum

Sequence: IQVIDISMILAEAIR, m/z:850.9831, charge:+ 2, Modification: Oxidation (M), Mod Position: 0.000000010000000.0

Score: 53.53, Raw data:WET\_A4\_090615\_03.mzxml, MS/MS Elution time: 100.0565, Scan number:5590, Mass delta:-0.0026, Rank:1

| No | b      | b++    | b*     | b*++   | b0 | b0++ | Seq | y       | y++    | y*      | y*++   | y0      | y0++   | RevNo |
|----|--------|--------|--------|--------|----|------|-----|---------|--------|---------|--------|---------|--------|-------|
| 1  | 114.09 | 57.55  |        |        |    |      | I   |         |        |         |        |         |        | 15    |
| 2  | 242.15 | 121.58 | 225.12 | 113.07 |    |      | Q   | 1523.88 | 762.44 | 1506.85 | 753.93 | 1505.87 | 753.44 | 14    |
| 3  | 341.22 | 171.11 | 324.19 | 162.6  |    |      | V   | 1395.82 | 698.41 | 1378.79 | 689.9  | 1377.81 | 689.41 | 13    |

|    |         |        |         |        |         |        |   |         |        |         |        |         |        |    |
|----|---------|--------|---------|--------|---------|--------|---|---------|--------|---------|--------|---------|--------|----|
| 4  | 454.3   | 227.65 | 437.28  | 219.14 |         |        | I | 1296.75 | 648.88 | 1279.73 | 640.37 | 1278.74 | 639.87 | 12 |
| 5  | 569.33  | 285.17 | 552.3   | 276.65 | 551.32  | 276.16 | D | 1183.67 | 592.34 | 1166.64 | 583.82 | 1165.66 | 583.33 | 11 |
| 6  | 682.41  | 341.71 | 665.39  | 333.2  | 664.4   | 332.71 | I | 1068.64 | 534.82 | 1051.61 | 526.31 | 1050.63 | 525.82 | 10 |
| 7  | 769.45  | 385.23 | 752.42  | 376.71 | 751.43  | 376.22 | S | 955.56  | 478.28 | 938.53  | 469.77 | 937.55  | 469.28 | 9  |
| 8  | 852.48  | 426.74 | 835.46  | 418.23 | 834.47  | 417.74 | M | 868.53  | 434.77 | 851.5   | 426.25 | 850.51  | 425.76 | 8  |
| 9  | 965.57  | 483.29 | 948.54  | 474.77 | 947.56  | 474.28 | I | 785.49  | 393.25 | 768.46  | 384.73 | 767.48  | 384.24 | 7  |
| 10 | 1078.65 | 539.83 | 1061.62 | 531.32 | 1060.64 | 530.82 | L | 672.4   | 336.71 | 655.38  | 328.19 | 654.39  | 327.7  | 6  |
| 11 | 1149.69 | 575.35 | 1132.66 | 566.83 | 1131.68 | 566.34 | A | 559.32  | 280.16 | 542.29  | 271.65 | 541.31  | 271.16 | 5  |
| 12 | 1278.73 | 639.87 | 1261.7  | 631.36 | 1260.72 | 630.86 | E | 488.28  | 244.65 | 471.26  | 236.13 | 470.27  | 235.64 | 4  |
| 13 | 1349.77 | 675.39 | 1332.74 | 666.87 | 1331.76 | 666.38 | A | 359.24  | 180.12 | 342.21  | 171.61 |         |        | 3  |
| 14 | 1462.85 | 731.93 | 1445.83 | 723.42 | 1444.84 | 722.92 | I | 288.2   | 144.61 | 271.18  | 136.09 |         |        | 2  |
| 15 |         |        |         |        |         |        | R | 175.12  | 88.06  | 158.09  | 79.55  |         |        | 1  |

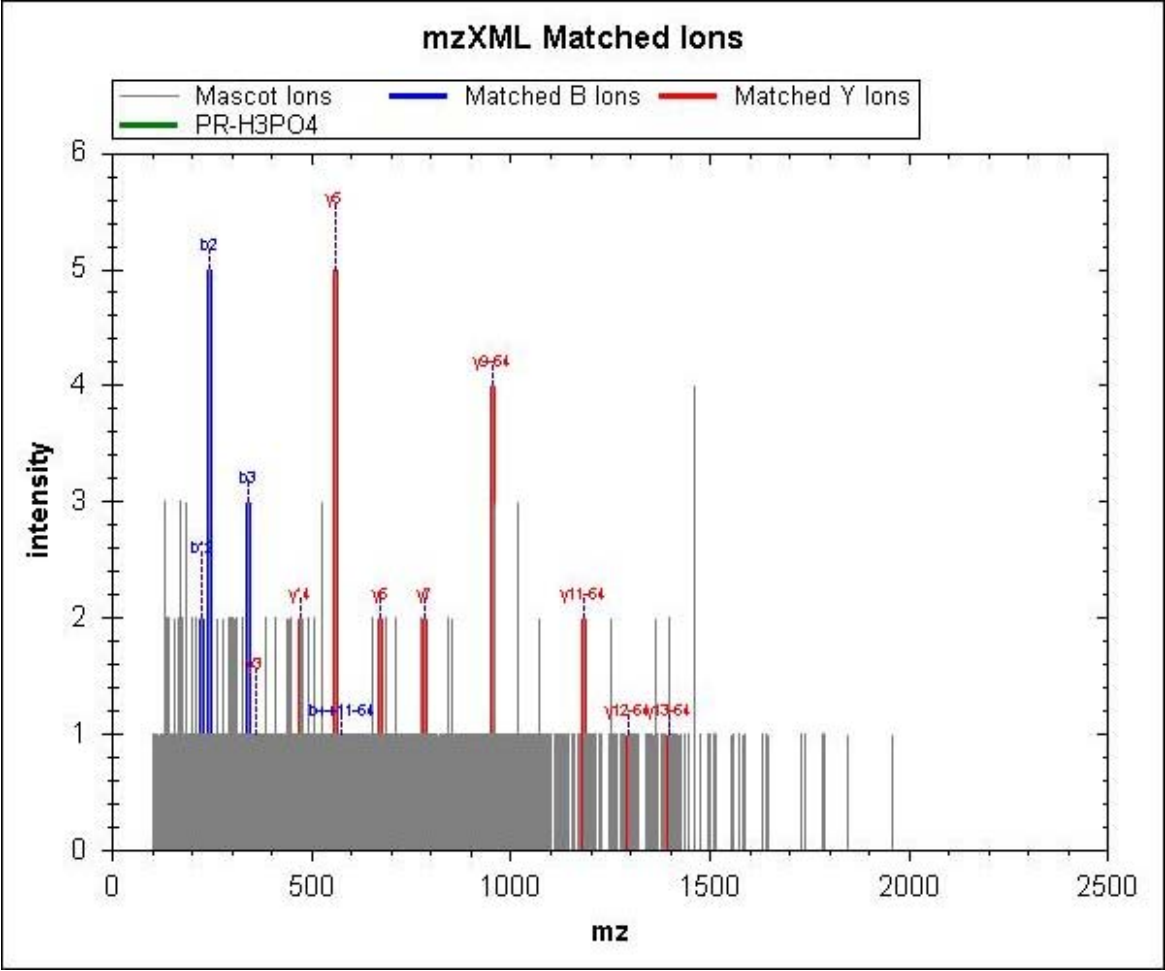

Protein index=973, ACC No: IPI00008552

Peptide index=6478 MS/MS spectrum

Sequence: YEISSVPTFLFFK, m/z:789.4231, charge:+ 2, Modification: , Mod Position:

Score: 42.78, Raw data:WET\_A4\_090615\_03.mzxml, MS/MS Elution time: 88.93383, Scan number:4936, Mass delta:0.014, Rank:1

| No | b | b++ | b0 | b0++ | Seq | y | y++ | y* | y*++ | y0 | y0++ | RevNo |
|----|---|-----|----|------|-----|---|-----|----|------|----|------|-------|
|----|---|-----|----|------|-----|---|-----|----|------|----|------|-------|

|    |         |        |         |        |   |         |        |         |        |         |        |    |
|----|---------|--------|---------|--------|---|---------|--------|---------|--------|---------|--------|----|
| 1  | 164.07  | 82.54  |         |        | Y |         |        |         |        |         |        | 13 |
| 2  | 293.11  | 147.06 | 275.1   | 138.05 | E | 1414.76 | 707.88 | 1397.74 | 699.37 | 1396.75 | 698.88 | 12 |
| 3  | 406.2   | 203.6  | 388.19  | 194.6  | I | 1285.72 | 643.36 | 1268.69 | 634.85 | 1267.71 | 634.36 | 11 |
| 4  | 493.23  | 247.12 | 475.22  | 238.11 | S | 1172.64 | 586.82 | 1155.61 | 578.31 | 1154.62 | 577.82 | 10 |
| 5  | 580.26  | 290.63 | 562.25  | 281.63 | S | 1085.6  | 543.31 | 1068.58 | 534.79 | 1067.59 | 534.3  | 9  |
| 6  | 679.33  | 340.17 | 661.32  | 331.16 | V | 998.57  | 499.79 | 981.54  | 491.28 | 980.56  | 490.78 | 8  |
| 7  | 776.38  | 388.69 | 758.37  | 379.69 | P | 899.5   | 450.25 | 882.48  | 441.74 | 881.49  | 441.25 | 7  |
| 8  | 877.43  | 439.22 | 859.42  | 430.21 | T | 802.45  | 401.73 | 785.42  | 393.22 | 784.44  | 392.72 | 6  |
| 9  | 1024.5  | 512.75 | 1006.49 | 503.75 | F | 701.4   | 351.2  | 684.38  | 342.69 |         |        | 5  |
| 10 | 1137.58 | 569.3  | 1119.57 | 560.29 | L | 554.33  | 277.67 | 537.31  | 269.16 |         |        | 4  |
| 11 | 1284.65 | 642.83 | 1266.64 | 633.82 | F | 441.25  | 221.13 | 424.22  | 212.62 |         |        | 3  |
| 12 | 1431.72 | 716.36 | 1413.71 | 707.36 | F | 294.18  | 147.59 | 277.15  | 139.08 |         |        | 2  |
| 13 |         |        |         |        | K | 147.11  | 74.06  | 130.09  | 65.55  |         |        | 1  |

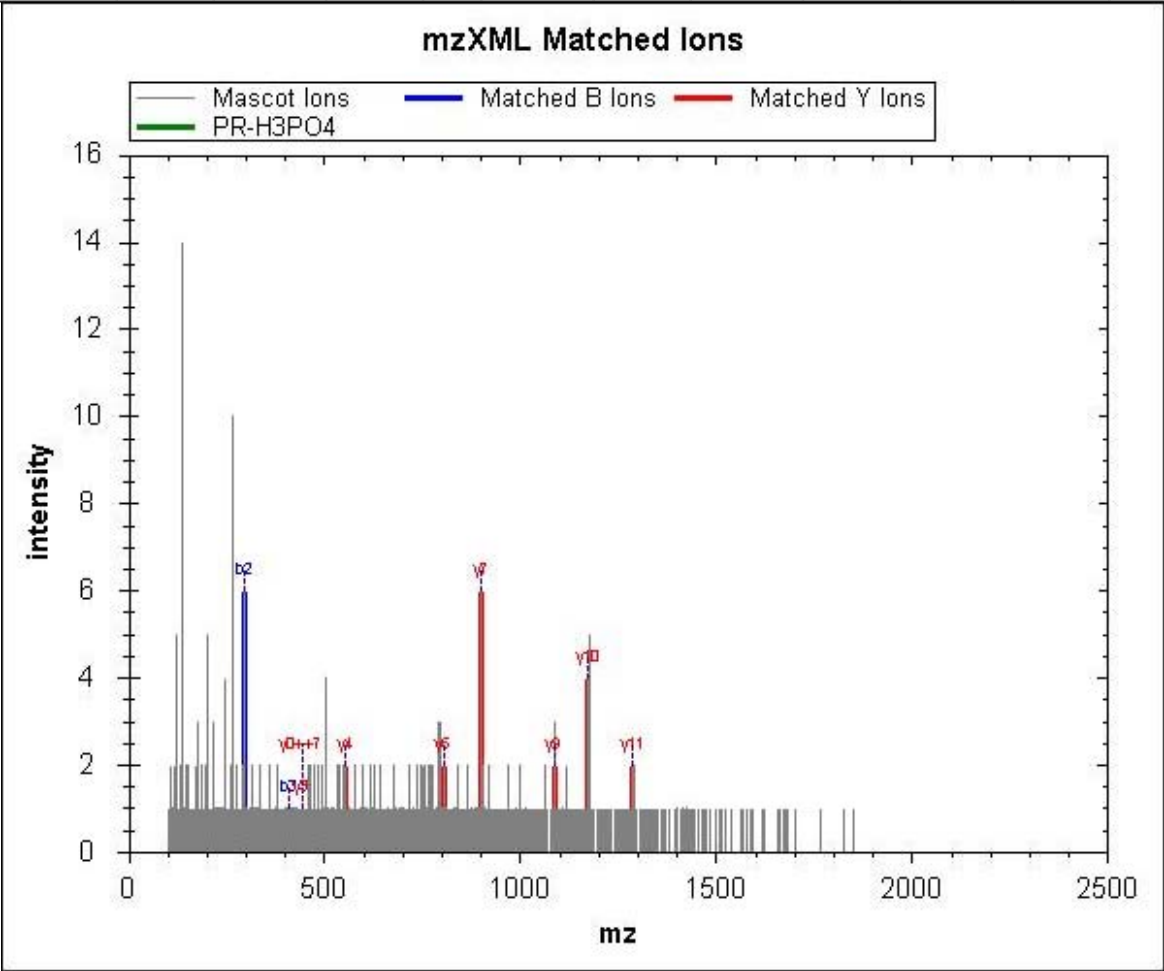

Protein index=975, ACC No:IP100011107

Peptide index=5855 MS/MS spectrum

Sequence: FKDIFQEIFDK, m/z:715.3744, charge:+ 2, Modification: , Mod Position:

Score: 66.28, Raw data:WET\_A4\_090615\_03.mzxml, MS/MS Elution time: 78.99683, Scan number:4359, Mass delta:0.0053, Rank:1

| No | b       | b++    | b*      | b*++   | b0      | b0++   | Seq | y       | y++    | y*      | y*++   | y0      | y0++   | RevNo |
|----|---------|--------|---------|--------|---------|--------|-----|---------|--------|---------|--------|---------|--------|-------|
| 1  | 148.08  | 74.54  |         |        |         |        | F   |         |        |         |        |         |        | 11    |
| 2  | 276.17  | 138.59 | 259.14  | 130.08 |         |        | K   | 1282.67 | 641.84 | 1265.64 | 633.32 | 1264.66 | 632.83 | 10    |
| 3  | 391.2   | 196.1  | 374.17  | 187.59 | 373.19  | 187.1  | D   | 1154.57 | 577.79 | 1137.55 | 569.28 | 1136.56 | 568.78 | 9     |
| 4  | 504.28  | 252.64 | 487.26  | 244.13 | 486.27  | 243.64 | I   | 1039.55 | 520.28 | 1022.52 | 511.76 | 1021.54 | 511.27 | 8     |
| 5  | 651.35  | 326.18 | 634.32  | 317.67 | 633.34  | 317.17 | F   | 926.46  | 463.73 | 909.44  | 455.22 | 908.45  | 454.73 | 7     |
| 6  | 779.41  | 390.21 | 762.38  | 381.69 | 761.4   | 381.2  | Q   | 779.39  | 390.2  | 762.37  | 381.69 | 761.38  | 381.2  | 6     |
| 7  | 908.45  | 454.73 | 891.42  | 446.22 | 890.44  | 445.72 | E   | 651.33  | 326.17 | 634.31  | 317.66 | 633.32  | 317.17 | 5     |
| 8  | 1021.54 | 511.27 | 1004.51 | 502.76 | 1003.52 | 502.27 | I   | 522.29  | 261.65 | 505.27  | 253.14 | 504.28  | 252.64 | 4     |
| 9  | 1168.6  | 584.81 | 1151.58 | 576.29 | 1150.59 | 575.8  | F   | 409.21  | 205.11 | 392.18  | 196.59 | 391.2   | 196.1  | 3     |
| 10 | 1283.63 | 642.32 | 1266.6  | 633.81 | 1265.62 | 633.31 | D   | 262.14  | 131.57 | 245.11  | 123.06 | 244.13  | 122.57 | 2     |
| 11 |         |        |         |        |         |        | K   | 147.11  | 74.06  | 130.09  | 65.55  |         |        | 1     |

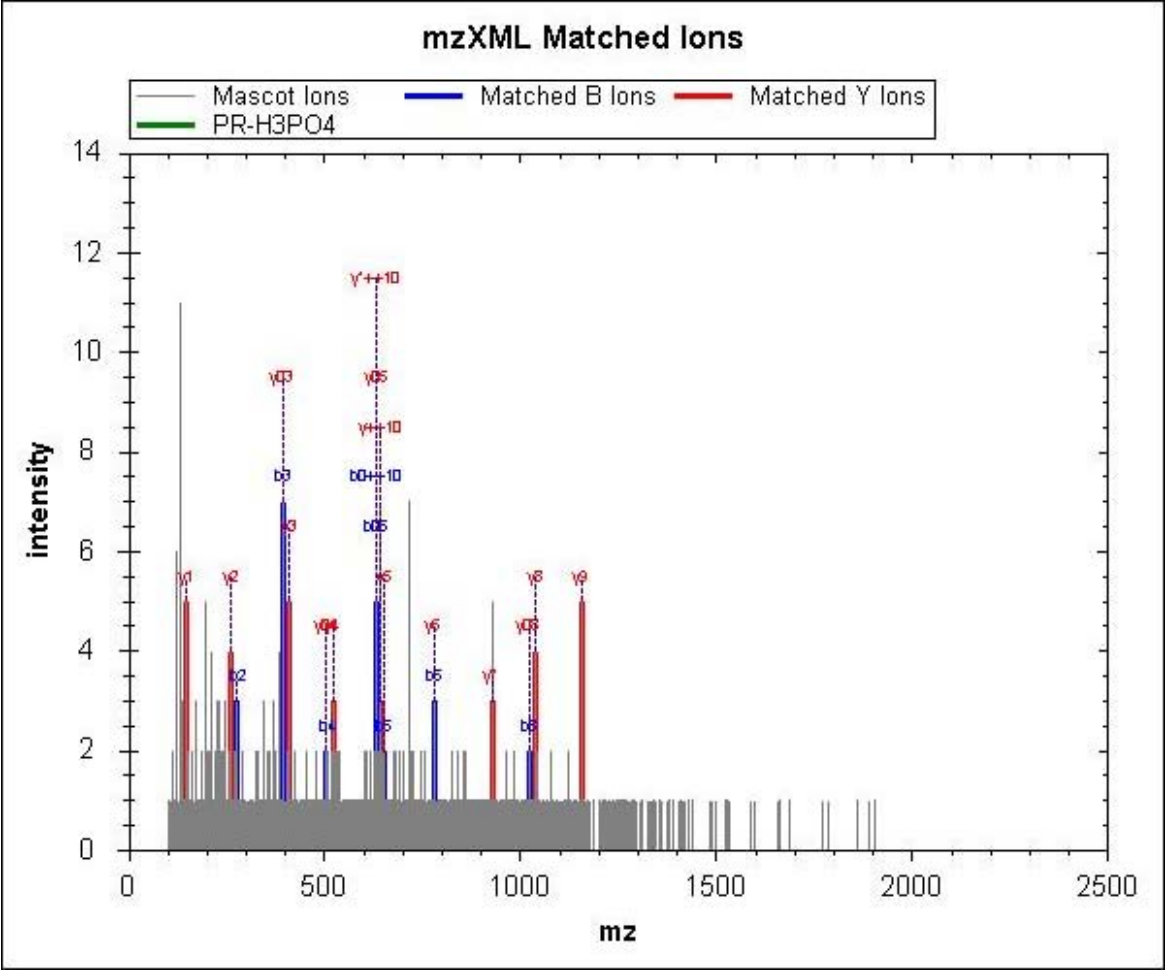

Protein index=980, ACC No:IPI00006362

Peptide index=1670 MS/MS spectrum

Sequence: INEKPQVIADYESGR, m/z:573.6214, charge:+ 3, Modification: , Mod Position:

Score: 66.88, Raw data:WET\_A5\_090615\_02.mzxml, MS/MS Elution time: 36.19983, Scan number:1876, Mass delta:-0.022, Rank:1

| No | b | b++ | b* | b*++ | b0 | b0++ | Seq | y | y++ | y* | y*++ | y0 | y0++ | RevNo |
|----|---|-----|----|------|----|------|-----|---|-----|----|------|----|------|-------|
|----|---|-----|----|------|----|------|-----|---|-----|----|------|----|------|-------|

|    |         |        |         |        |         |        |   |         |        |         |        |         |        |    |
|----|---------|--------|---------|--------|---------|--------|---|---------|--------|---------|--------|---------|--------|----|
| 1  | 114.09  | 57.55  |         |        |         |        | I |         |        |         |        |         |        | 15 |
| 2  | 228.13  | 114.57 | 211.11  | 106.06 |         |        | N | 1605.79 | 803.4  | 1588.76 | 794.88 | 1587.78 | 794.39 | 14 |
| 3  | 357.18  | 179.09 | 340.15  | 170.58 | 339.17  | 170.09 | E | 1491.74 | 746.38 | 1474.72 | 737.86 | 1473.73 | 737.37 | 13 |
| 4  | 485.27  | 243.14 | 468.25  | 234.63 | 467.26  | 234.13 | K | 1362.7  | 681.85 | 1345.67 | 673.34 | 1344.69 | 672.85 | 12 |
| 5  | 582.32  | 291.67 | 565.3   | 283.15 | 564.31  | 282.66 | P | 1234.61 | 617.81 | 1217.58 | 609.29 | 1216.6  | 608.8  | 11 |
| 6  | 710.38  | 355.7  | 693.36  | 347.18 | 692.37  | 346.69 | Q | 1137.55 | 569.28 | 1120.53 | 560.77 | 1119.54 | 560.28 | 10 |
| 7  | 809.45  | 405.23 | 792.42  | 396.72 | 791.44  | 396.22 | V | 1009.49 | 505.25 | 992.47  | 496.74 | 991.48  | 496.25 | 9  |
| 8  | 922.54  | 461.77 | 905.51  | 453.26 | 904.53  | 452.77 | I | 910.43  | 455.72 | 893.4   | 447.2  | 892.42  | 446.71 | 8  |
| 9  | 993.57  | 497.29 | 976.55  | 488.78 | 975.56  | 488.28 | A | 797.34  | 399.17 | 780.32  | 390.66 | 779.33  | 390.17 | 7  |
| 10 | 1108.6  | 554.8  | 1091.57 | 546.29 | 1090.59 | 545.8  | D | 726.31  | 363.66 | 709.28  | 355.14 | 708.29  | 354.65 | 6  |
| 11 | 1271.66 | 636.34 | 1254.64 | 627.82 | 1253.65 | 627.33 | Y | 611.28  | 306.14 | 594.25  | 297.63 | 593.27  | 297.14 | 5  |
| 12 | 1400.71 | 700.86 | 1383.68 | 692.34 | 1382.7  | 691.85 | E | 448.22  | 224.61 | 431.19  | 216.1  | 430.2   | 215.61 | 4  |
| 13 | 1487.74 | 744.37 | 1470.71 | 735.86 | 1469.73 | 735.37 | S | 319.17  | 160.09 | 302.15  | 151.58 | 301.16  | 151.08 | 3  |
| 14 | 1544.76 | 772.88 | 1527.73 | 764.37 | 1526.75 | 763.88 | G | 232.14  | 116.57 | 215.11  | 108.06 |         |        | 2  |
| 15 |         |        |         |        |         |        | R | 175.12  | 88.06  | 158.09  | 79.55  |         |        | 1  |

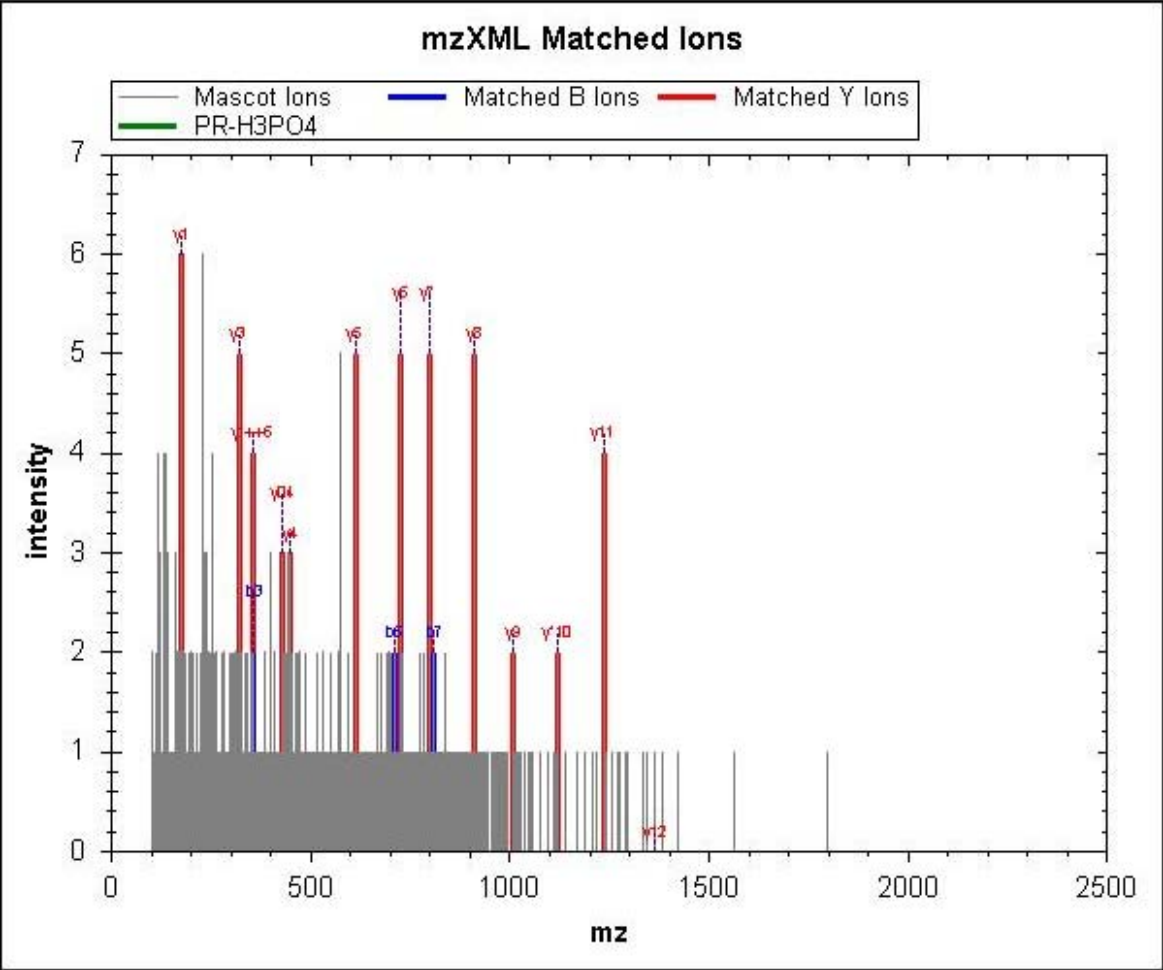

Protein index=990, ACC No:IPI00007755

Peptide index=666 MS/MS spectrum

Sequence: MIETAQVDER, m/z:596.2845, charge:+ 2, Modification: , Mod Position:

Score: 51.42, Raw data:WET\_B5\_090616\_01.mzxml, MS/MS Elution time: 22.343, Scan number:1066,

Mass delta:0.0057, Rank:1

| No | b       | b++    | b*      | b*++   | b0     | b0++   | Seq | y       | y++    | y*     | y*++   | y0      | y0++   | RevNo |
|----|---------|--------|---------|--------|--------|--------|-----|---------|--------|--------|--------|---------|--------|-------|
| 1  | 132.05  | 66.53  |         |        |        |        | M   |         |        |        |        |         |        | 10    |
| 2  | 245.13  | 123.07 |         |        |        |        | I   | 1060.53 | 530.77 | 1043.5 | 522.25 | 1042.52 | 521.76 | 9     |
| 3  | 374.17  | 187.59 |         |        | 356.16 | 178.59 | E   | 947.44  | 474.23 | 930.42 | 465.71 | 929.43  | 465.22 | 8     |
| 4  | 475.22  | 238.11 |         |        | 457.21 | 229.11 | T   | 818.4   | 409.7  | 801.37 | 401.19 | 800.39  | 400.7  | 7     |
| 5  | 546.26  | 273.63 |         |        | 528.25 | 264.63 | A   | 717.35  | 359.18 | 700.33 | 350.67 | 699.34  | 350.17 | 6     |
| 6  | 674.32  | 337.66 | 657.29  | 329.15 | 656.31 | 328.66 | Q   | 646.32  | 323.66 | 629.29 | 315.15 | 628.3   | 314.66 | 5     |
| 7  | 773.39  | 387.2  | 756.36  | 378.68 | 755.38 | 378.19 | V   | 518.26  | 259.63 | 501.23 | 251.12 | 500.25  | 250.63 | 4     |
| 8  | 888.41  | 444.71 | 871.39  | 436.2  | 870.4  | 435.7  | D   | 419.19  | 210.1  | 402.16 | 201.58 | 401.18  | 201.09 | 3     |
| 9  | 1017.46 | 509.23 | 1000.43 | 500.72 | 999.45 | 500.23 | E   | 304.16  | 152.58 | 287.13 | 144.07 | 286.15  | 143.58 | 2     |
| 10 |         |        |         |        |        |        | R   | 175.12  | 88.06  | 158.09 | 79.55  |         |        | 1     |

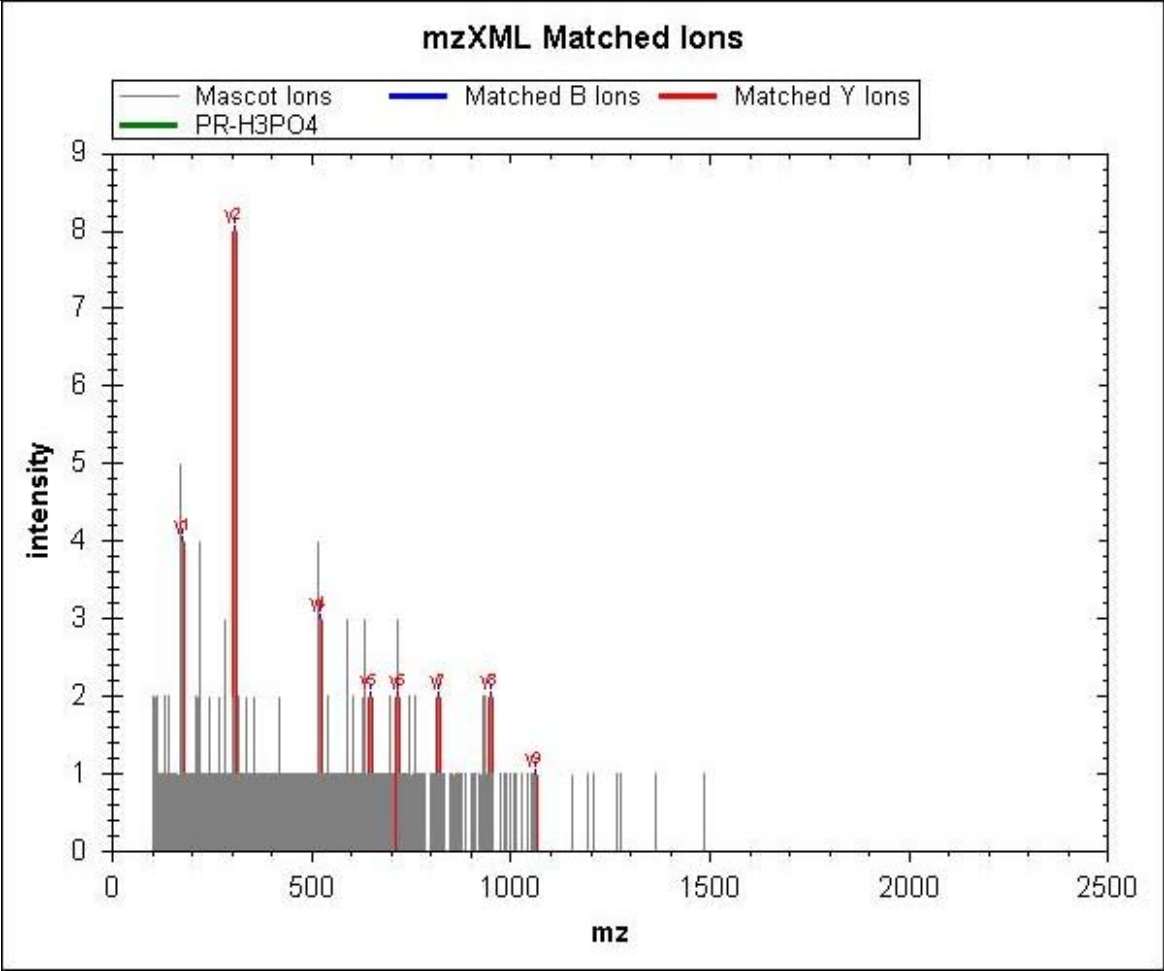

Protein index=1000, ACC No:IPI00329036

Peptide index=5922 MS/MS spectrum

Sequence: FNLLAHLADDLGHVVPNSR, m/z:696.7021, charge:+ 3, Modification: , Mod Position:

Score: 93.38, Raw data:WET\_A5\_090615\_02.mzxml, MS/MS Elution time: 79.91666, Scan number:4436, Mass delta:-0.0057, Rank:1

|  |  |  |  |  |  |  |  |  |  |  |  |  |  |  |
|--|--|--|--|--|--|--|--|--|--|--|--|--|--|--|
|  |  |  |  |  |  |  |  |  |  |  |  |  |  |  |
|--|--|--|--|--|--|--|--|--|--|--|--|--|--|--|



Protein index=1002, ACC No: IPI00045660

Peptide index=1979 MS/MS spectrum

Sequence: FEAGQFEPSETTAK, m/z:771.3591, charge:+ 2, Modification: , Mod Position:

Score: 58.13, Raw data:WET\_A5\_090615\_03.mzxml, MS/MS Elution time: 39.58833, Scan number:2077, Mass delta:0.0064, Rank:1

| No | b       | b++    | b*      | b*++   | b0      | b0++   | Seq | y       | y++    | y*      | y*++   | y0      | y0++   | RevNo |
|----|---------|--------|---------|--------|---------|--------|-----|---------|--------|---------|--------|---------|--------|-------|
| 1  | 148.08  | 74.54  |         |        |         |        | F   |         |        |         |        |         |        | 14    |
| 2  | 277.12  | 139.06 |         |        | 259.11  | 130.06 | E   | 1394.64 | 697.83 | 1377.62 | 689.31 | 1376.63 | 688.82 | 13    |
| 3  | 348.16  | 174.58 |         |        | 330.14  | 165.58 | A   | 1265.6  | 633.3  | 1248.57 | 624.79 | 1247.59 | 624.3  | 12    |
| 4  | 405.18  | 203.09 |         |        | 387.17  | 194.09 | G   | 1194.56 | 597.79 | 1177.54 | 589.27 | 1176.55 | 588.78 | 11    |
| 5  | 533.24  | 267.12 | 516.21  | 258.61 | 515.22  | 258.12 | Q   | 1137.54 | 569.27 | 1120.52 | 560.76 | 1119.53 | 560.27 | 10    |
| 6  | 680.3   | 340.66 | 663.28  | 332.14 | 662.29  | 331.65 | F   | 1009.48 | 505.25 | 992.46  | 496.73 | 991.47  | 496.24 | 9     |
| 7  | 809.35  | 405.18 | 792.32  | 396.66 | 791.34  | 396.17 | E   | 862.42  | 431.71 | 845.39  | 423.2  | 844.4   | 422.71 | 8     |
| 8  | 906.4   | 453.7  | 889.37  | 445.19 | 888.39  | 444.7  | P   | 733.37  | 367.19 | 716.35  | 358.68 | 715.36  | 358.18 | 7     |
| 9  | 993.43  | 497.22 | 976.4   | 488.71 | 975.42  | 488.21 | S   | 636.32  | 318.66 | 619.29  | 310.15 | 618.31  | 309.66 | 6     |
| 10 | 1122.47 | 561.74 | 1105.45 | 553.23 | 1104.46 | 552.74 | E   | 549.29  | 275.15 | 532.26  | 266.63 | 531.28  | 266.14 | 5     |
| 11 | 1223.52 | 612.26 | 1206.5  | 603.75 | 1205.51 | 603.26 | T   | 420.25  | 210.63 | 403.22  | 202.11 | 402.23  | 201.62 | 4     |
| 12 | 1324.57 | 662.79 | 1307.54 | 654.28 | 1306.56 | 653.78 | T   | 319.2   | 160.1  | 302.17  | 151.59 | 301.19  | 151.1  | 3     |
| 13 | 1395.61 | 698.31 | 1378.58 | 689.79 | 1377.6  | 689.3  | A   | 218.15  | 109.58 | 201.12  | 101.07 |         |        | 2     |
| 14 |         |        |         |        |         |        | K   | 147.11  | 74.06  | 130.09  | 65.55  |         |        | 1     |

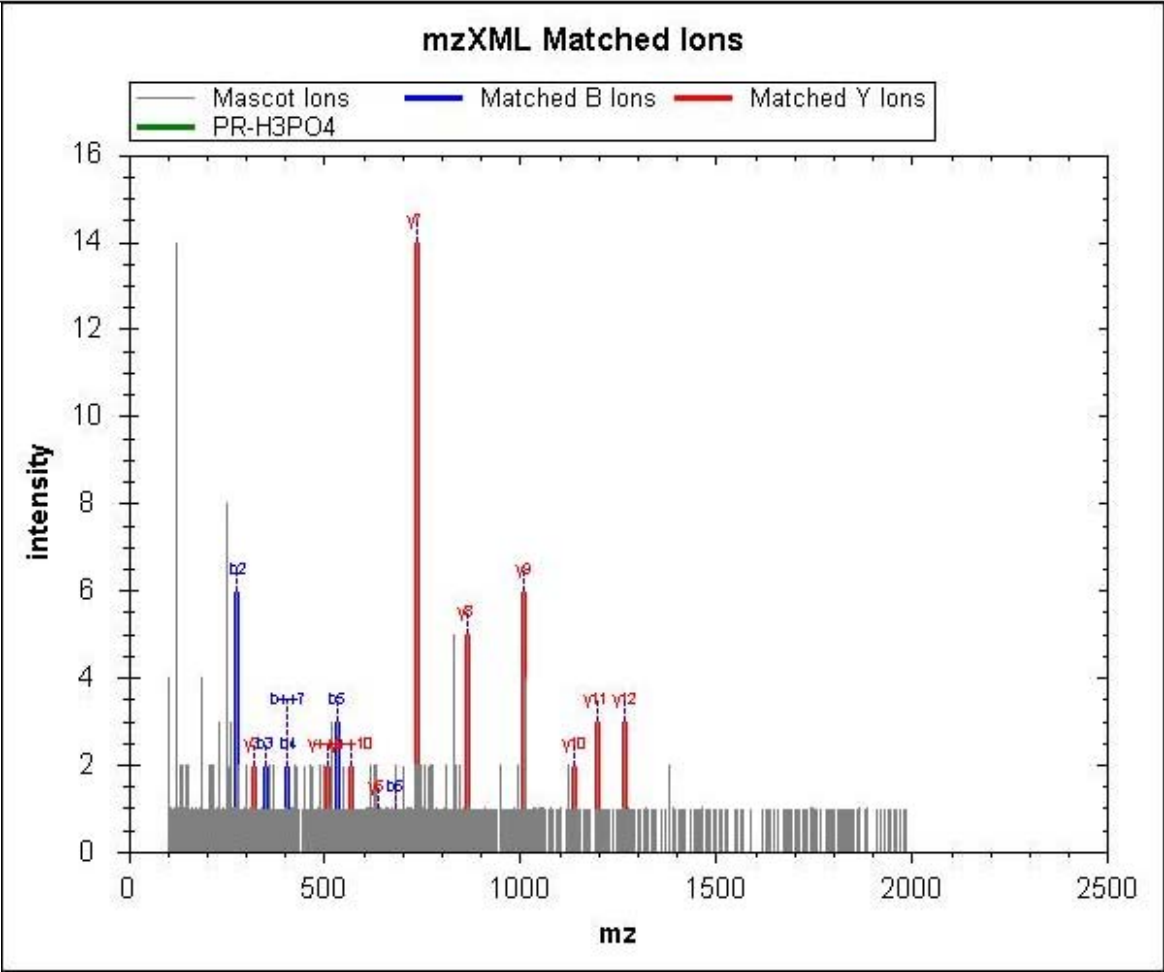

Protein index=1003, ACC No:IPI00013917

Peptide index=1157 MS/MS spectrum

Sequence: TALIHDGLAR, m/z:533.8042, charge:+ 2, Modification: , Mod Position:

Score: 53.72, Raw data:WET\_B5\_090616\_01.mzxml, MS/MS Elution time: 30.15883, Scan number:1525, Mass delta:-0.0018, Rank:1

| No | b      | b++    | b0     | b0++   | Seq | y      | y++    | y*     | y*++   | y0     | y0++   | RevNo |
|----|--------|--------|--------|--------|-----|--------|--------|--------|--------|--------|--------|-------|
| 1  | 102.05 | 51.53  | 84.04  | 42.53  | T   |        |        |        |        |        |        | 10    |
| 2  | 173.09 | 87.05  | 155.08 | 78.04  | A   | 965.55 | 483.28 | 948.53 | 474.77 | 947.54 | 474.27 | 9     |
| 3  | 286.18 | 143.59 | 268.17 | 134.59 | L   | 894.52 | 447.76 | 877.49 | 439.25 | 876.5  | 438.76 | 8     |
| 4  | 399.26 | 200.13 | 381.25 | 191.13 | I   | 781.43 | 391.22 | 764.4  | 382.71 | 763.42 | 382.21 | 7     |
| 5  | 536.32 | 268.66 | 518.31 | 259.66 | H   | 668.35 | 334.68 | 651.32 | 326.16 | 650.34 | 325.67 | 6     |
| 6  | 651.35 | 326.18 | 633.34 | 317.17 | D   | 531.29 | 266.15 | 514.26 | 257.63 | 513.28 | 257.14 | 5     |
| 7  | 708.37 | 354.69 | 690.36 | 345.68 | G   | 416.26 | 208.63 | 399.24 | 200.12 |        |        | 4     |
| 8  | 821.45 | 411.23 | 803.44 | 402.22 | L   | 359.24 | 180.12 | 342.21 | 171.61 |        |        | 3     |
| 9  | 892.49 | 446.75 | 874.48 | 437.74 | A   | 246.16 | 123.58 | 229.13 | 115.07 |        |        | 2     |
| 10 |        |        |        |        | R   | 175.12 | 88.06  | 158.09 | 79.55  |        |        | 1     |

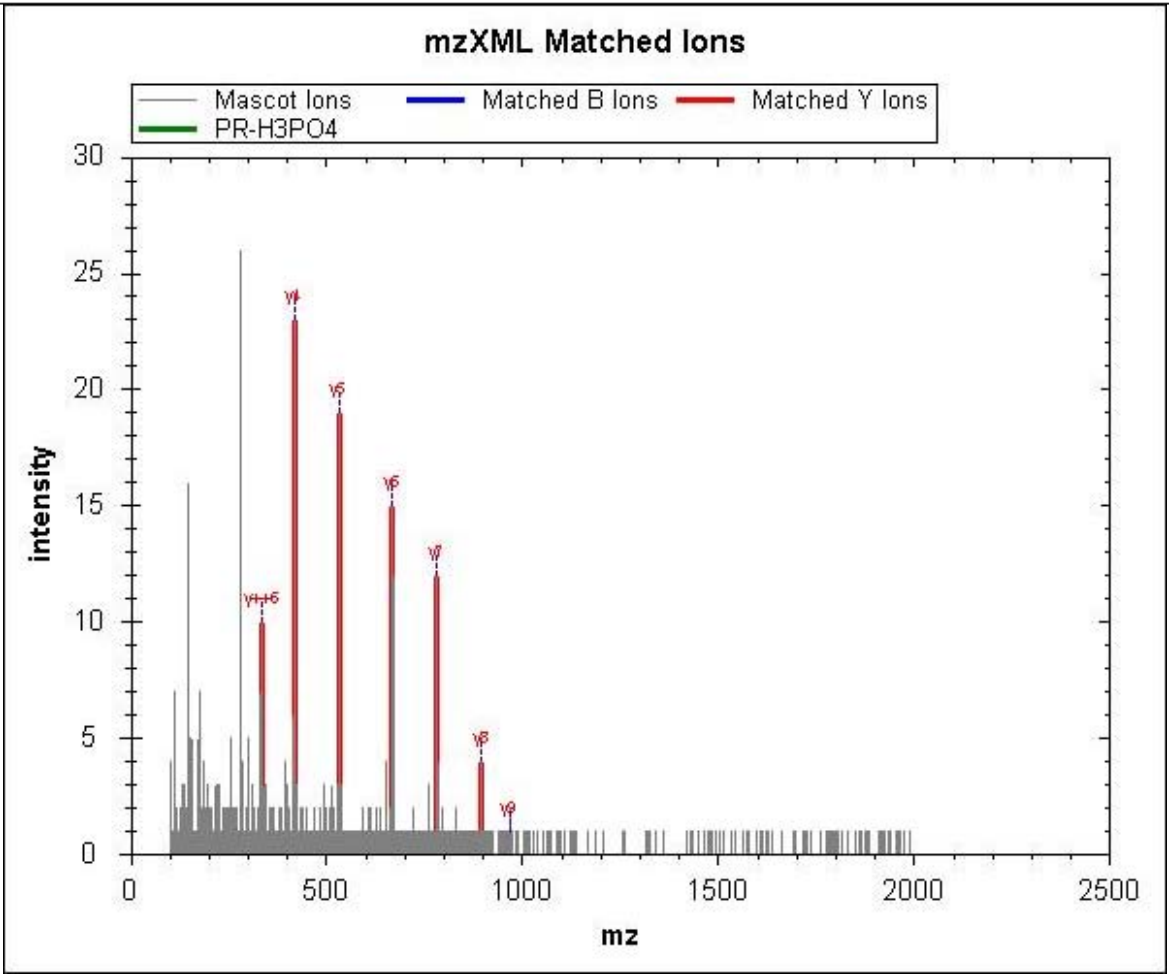

Protein index=1018, ACC No:IPI00301364

Peptide index=1428 MS/MS spectrum

Sequence: NDFTEEEEAQVR, m/z:733.825, charge:+ 2, Modification: , Mod Position:

Score: 78.16, Raw data:WET\_A5\_090615\_01.mzxml, MS/MS Elution time: 33.08883, Scan number:1701, Mass delta:0.0034, Rank:1

| No | b       | b++    | b*      | b*++   | b0      | b0++   | Seq | y       | y++    | y*      | y*++   | y0      | y0++   | RevNo |
|----|---------|--------|---------|--------|---------|--------|-----|---------|--------|---------|--------|---------|--------|-------|
| 1  | 115.05  | 58.03  | 98.02   | 49.52  |         |        | N   |         |        |         |        |         |        | 12    |
| 2  | 230.08  | 115.54 | 213.05  | 107.03 | 212.07  | 106.54 | D   | 1352.6  | 676.8  | 1335.57 | 668.29 | 1334.59 | 667.8  | 11    |
| 3  | 377.15  | 189.08 | 360.12  | 180.56 | 359.14  | 180.07 | F   | 1237.57 | 619.29 | 1220.54 | 610.78 | 1219.56 | 610.28 | 10    |
| 4  | 478.19  | 239.6  | 461.17  | 231.09 | 460.18  | 230.59 | T   | 1090.5  | 545.75 | 1073.47 | 537.24 | 1072.49 | 536.75 | 9     |
| 5  | 607.24  | 304.12 | 590.21  | 295.61 | 589.23  | 295.12 | E   | 989.45  | 495.23 | 972.43  | 486.72 | 971.44  | 486.23 | 8     |
| 6  | 736.28  | 368.64 | 719.25  | 360.13 | 718.27  | 359.64 | E   | 860.41  | 430.71 | 843.38  | 422.2  | 842.4   | 421.7  | 7     |
| 7  | 865.32  | 433.16 | 848.29  | 424.65 | 847.31  | 424.16 | E   | 731.37  | 366.19 | 714.34  | 357.67 | 713.36  | 357.18 | 6     |
| 8  | 994.36  | 497.69 | 977.34  | 489.17 | 976.35  | 488.68 | E   | 602.33  | 301.67 | 585.3   | 293.15 | 584.32  | 292.66 | 5     |
| 9  | 1065.4  | 533.2  | 1048.37 | 524.69 | 1047.39 | 524.2  | A   | 473.28  | 237.15 | 456.26  | 228.63 |         |        | 4     |
| 10 | 1193.46 | 597.23 | 1176.43 | 588.72 | 1175.45 | 588.23 | Q   | 402.25  | 201.63 | 385.22  | 193.11 |         |        | 3     |
| 11 | 1292.53 | 646.77 | 1275.5  | 638.25 | 1274.52 | 637.76 | V   | 274.19  | 137.6  | 257.16  | 129.08 |         |        | 2     |
| 12 |         |        |         |        |         |        | R   | 175.12  | 88.06  | 158.09  | 79.55  |         |        | 1     |

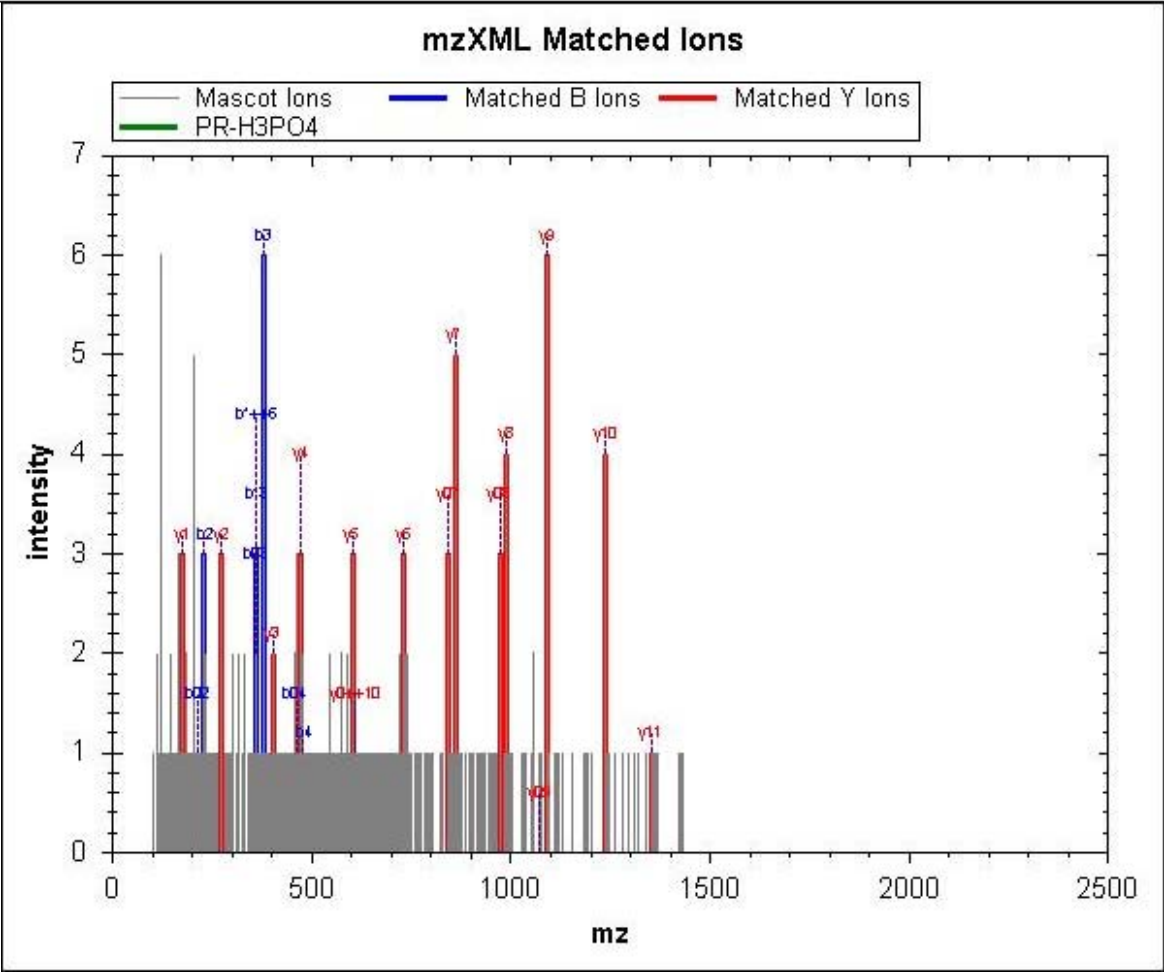

Protein index=1023, ACC No: IPI00031617

Peptide index=4668 MS/MS spectrum

Sequence: LILSTDTLEELKEIDK, m/z:620.6753, charge:+ 3, Modification: , Mod Position:

Score: 58.65, Raw data:WET\_A5\_090615\_01.mzxml, MS/MS Elution time: 64.37566, Scan number:3533, Mass delta:-0.0098, Rank:1

| No | b       | b++    | b*      | b*++   | b0      | b0++   | Seq | y       | y++    | y*      | y*++   | y0      | y0++   | RevNo |
|----|---------|--------|---------|--------|---------|--------|-----|---------|--------|---------|--------|---------|--------|-------|
| 1  | 114.09  | 57.55  |         |        |         |        | L   |         |        |         |        |         |        | 16    |
| 2  | 227.18  | 114.09 |         |        |         |        | I   | 1746.94 | 873.97 | 1729.91 | 865.46 | 1728.93 | 864.97 | 15    |
| 3  | 340.26  | 170.63 |         |        |         |        | L   | 1633.85 | 817.43 | 1616.83 | 808.92 | 1615.84 | 808.42 | 14    |
| 4  | 427.29  | 214.15 |         |        | 409.28  | 205.14 | S   | 1520.77 | 760.89 | 1503.74 | 752.37 | 1502.76 | 751.88 | 13    |
| 5  | 528.34  | 264.67 |         |        | 510.33  | 255.67 | T   | 1433.74 | 717.37 | 1416.71 | 708.86 | 1415.73 | 708.37 | 12    |
| 6  | 643.37  | 322.19 |         |        | 625.36  | 313.18 | D   | 1332.69 | 666.85 | 1315.66 | 658.34 | 1314.68 | 657.84 | 11    |
| 7  | 744.41  | 372.71 |         |        | 726.4   | 363.71 | T   | 1217.66 | 609.33 | 1200.64 | 600.82 | 1199.65 | 600.33 | 10    |
| 8  | 857.5   | 429.25 |         |        | 839.49  | 420.25 | L   | 1116.61 | 558.81 | 1099.59 | 550.3  | 1098.6  | 549.81 | 9     |
| 9  | 986.54  | 493.77 |         |        | 968.53  | 484.77 | E   | 1003.53 | 502.27 | 986.5   | 493.76 | 985.52  | 493.26 | 8     |
| 10 | 1115.58 | 558.3  |         |        | 1097.57 | 549.29 | E   | 874.49  | 437.75 | 857.46  | 429.23 | 856.48  | 428.74 | 7     |
| 11 | 1228.67 | 614.84 |         |        | 1210.66 | 605.83 | L   | 745.45  | 373.23 | 728.42  | 364.71 | 727.43  | 364.22 | 6     |
| 12 | 1356.76 | 678.88 | 1339.74 | 670.37 | 1338.75 | 669.88 | K   | 632.36  | 316.68 | 615.33  | 308.17 | 614.35  | 307.68 | 5     |



|    |         |        |         |        |         |        |   |        |        |        |        |        |        |   |
|----|---------|--------|---------|--------|---------|--------|---|--------|--------|--------|--------|--------|--------|---|
| 9  | 1059.46 | 530.23 | 1042.43 | 521.72 | 1041.45 | 521.23 | A | 686.35 | 343.68 | 669.32 | 335.16 | 668.34 | 334.67 | 6 |
| 10 | 1174.49 | 587.75 | 1157.46 | 579.23 | 1156.48 | 578.74 | D | 615.31 | 308.16 | 598.28 | 299.65 | 597.3  | 299.15 | 5 |
| 11 | 1287.57 | 644.29 | 1270.54 | 635.78 | 1269.56 | 635.28 | I | 500.28 | 250.65 | 483.26 | 242.13 | 482.27 | 241.64 | 4 |
| 12 | 1384.62 | 692.82 | 1367.6  | 684.3  | 1366.61 | 683.81 | P | 387.2  | 194.1  | 370.17 | 185.59 | 369.19 | 185.1  | 3 |
| 13 | 1499.65 | 750.33 | 1482.62 | 741.82 | 1481.64 | 741.32 | D | 290.15 | 145.58 | 273.12 | 137.06 | 272.14 | 136.57 | 2 |
| 14 |         |        |         |        |         |        | R | 175.12 | 88.06  | 158.09 | 79.55  |        |        | 1 |

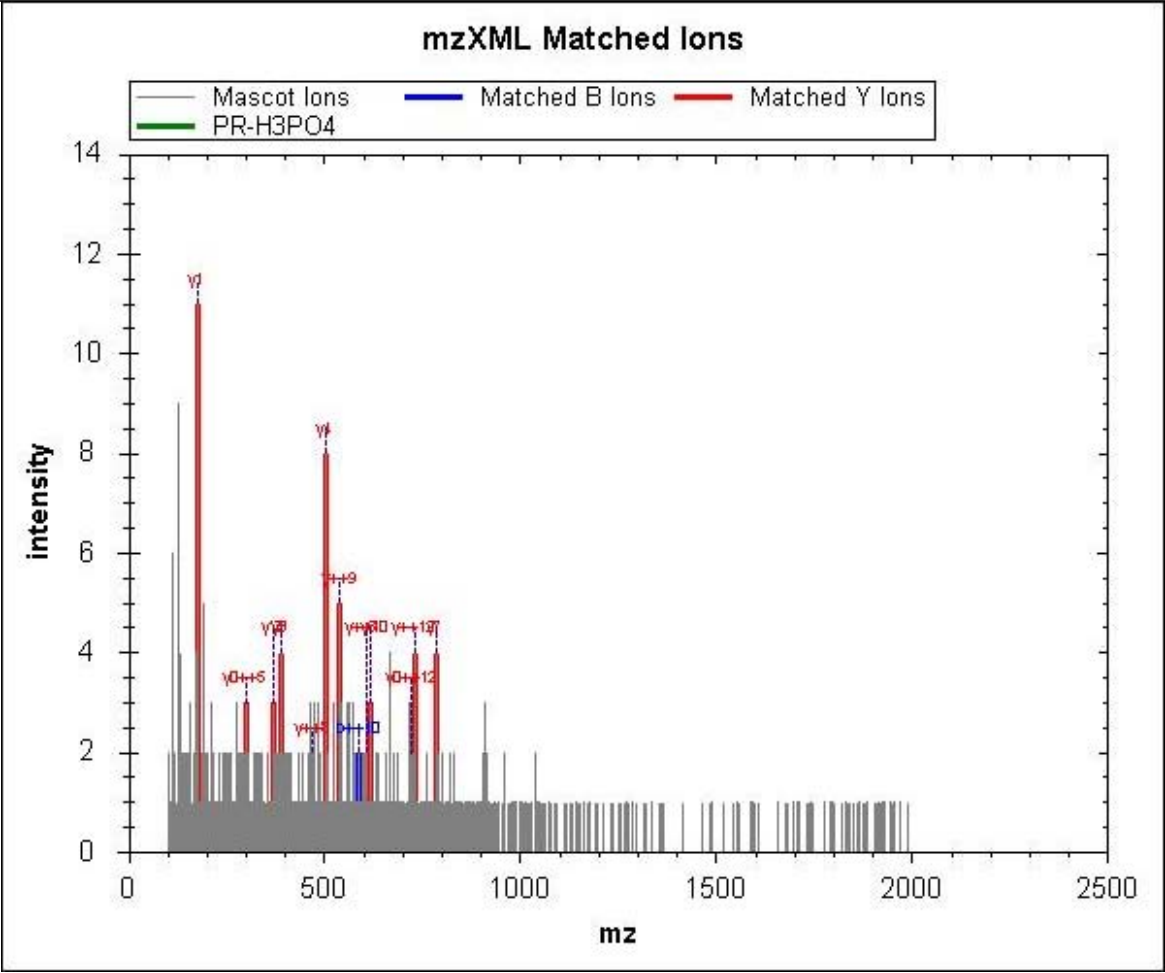

Protein index=1034, ACC No:IPI00008433

Peptide index=5455 MS/MS spectrum

Sequence: WSTDDVQINDISLQDYIAVK, m/z:1162.076, charge:+ 2, Modification: , Mod Position:

Score: 108.11, Raw data:WET\_A5\_090615\_01.mzxml, MS/MS Elution time: 73.682, Scan number:4078, Mass delta:-0.0013, Rank:1

| No | b      | b++    | b* | b*++ | b0     | b0++   | Seq | y       | y++     | y*      | y*++    | y0      | y0++    | RevNo |
|----|--------|--------|----|------|--------|--------|-----|---------|---------|---------|---------|---------|---------|-------|
| 1  | 187.09 | 94.05  |    |      |        |        | W   |         |         |         |         |         |         | 20    |
| 2  | 274.12 | 137.56 |    |      | 256.11 | 128.56 | S   | 2137.07 | 1069.04 | 2120.04 | 1060.52 | 2119.06 | 1060.03 | 19    |
| 3  | 375.17 | 188.09 |    |      | 357.16 | 179.08 | T   | 2050.03 | 1025.52 | 2033.01 | 1017.01 | 2032.02 | 1016.52 | 18    |
| 4  | 490.19 | 245.6  |    |      | 472.18 | 236.59 | D   | 1948.99 | 975     | 1931.96 | 966.48  | 1930.98 | 965.99  | 17    |
| 5  | 605.22 | 303.11 |    |      | 587.21 | 294.11 | D   | 1833.96 | 917.48  | 1816.93 | 908.97  | 1815.95 | 908.48  | 16    |
| 6  | 704.29 | 352.65 |    |      | 686.28 | 343.64 | V   | 1718.93 | 859.97  | 1701.91 | 851.46  | 1700.92 | 850.96  | 15    |

|    |         |         |         |         |         |         |   |         |        |         |        |         |        |    |
|----|---------|---------|---------|---------|---------|---------|---|---------|--------|---------|--------|---------|--------|----|
| 7  | 832.35  | 416.68  | 815.32  | 408.16  | 814.34  | 407.67  | Q | 1619.86 | 810.44 | 1602.84 | 801.92 | 1601.85 | 801.43 | 14 |
| 8  | 945.43  | 473.22  | 928.4   | 464.71  | 927.42  | 464.21  | I | 1491.81 | 746.41 | 1474.78 | 737.89 | 1473.79 | 737.4  | 13 |
| 9  | 1059.47 | 530.24  | 1042.45 | 521.73  | 1041.46 | 521.24  | N | 1378.72 | 689.86 | 1361.69 | 681.35 | 1360.71 | 680.86 | 12 |
| 10 | 1174.5  | 587.75  | 1157.47 | 579.24  | 1156.49 | 578.75  | D | 1264.68 | 632.84 | 1247.65 | 624.33 | 1246.67 | 623.84 | 11 |
| 11 | 1287.59 | 644.3   | 1270.56 | 635.78  | 1269.57 | 635.29  | I | 1149.65 | 575.33 | 1132.62 | 566.82 | 1131.64 | 566.32 | 10 |
| 12 | 1374.62 | 687.81  | 1357.59 | 679.3   | 1356.61 | 678.81  | S | 1036.57 | 518.79 | 1019.54 | 510.27 | 1018.56 | 509.78 | 9  |
| 13 | 1487.7  | 744.35  | 1470.67 | 735.84  | 1469.69 | 735.35  | L | 949.54  | 475.27 | 932.51  | 466.76 | 931.52  | 466.27 | 8  |
| 14 | 1615.76 | 808.38  | 1598.73 | 799.87  | 1597.75 | 799.38  | Q | 836.45  | 418.73 | 819.42  | 410.22 | 818.44  | 409.72 | 7  |
| 15 | 1730.79 | 865.9   | 1713.76 | 857.38  | 1712.78 | 856.89  | D | 708.39  | 354.7  | 691.37  | 346.19 | 690.38  | 345.69 | 6  |
| 16 | 1893.85 | 947.43  | 1876.82 | 938.92  | 1875.84 | 938.42  | Y | 593.37  | 297.19 | 576.34  | 288.67 |         |        | 5  |
| 17 | 2006.93 | 1003.97 | 1989.91 | 995.46  | 1988.92 | 994.97  | I | 430.3   | 215.65 | 413.28  | 207.14 |         |        | 4  |
| 18 | 2077.97 | 1039.49 | 2060.95 | 1030.98 | 2059.96 | 1030.48 | A | 317.22  | 159.11 | 300.19  | 150.6  |         |        | 3  |
| 19 | 2177.04 | 1089.02 | 2160.01 | 1080.51 | 2159.03 | 1080.02 | V | 246.18  | 123.59 | 229.15  | 115.08 |         |        | 2  |
| 20 |         |         |         |         |         |         | K | 147.11  | 74.06  | 130.09  | 65.55  |         |        | 1  |

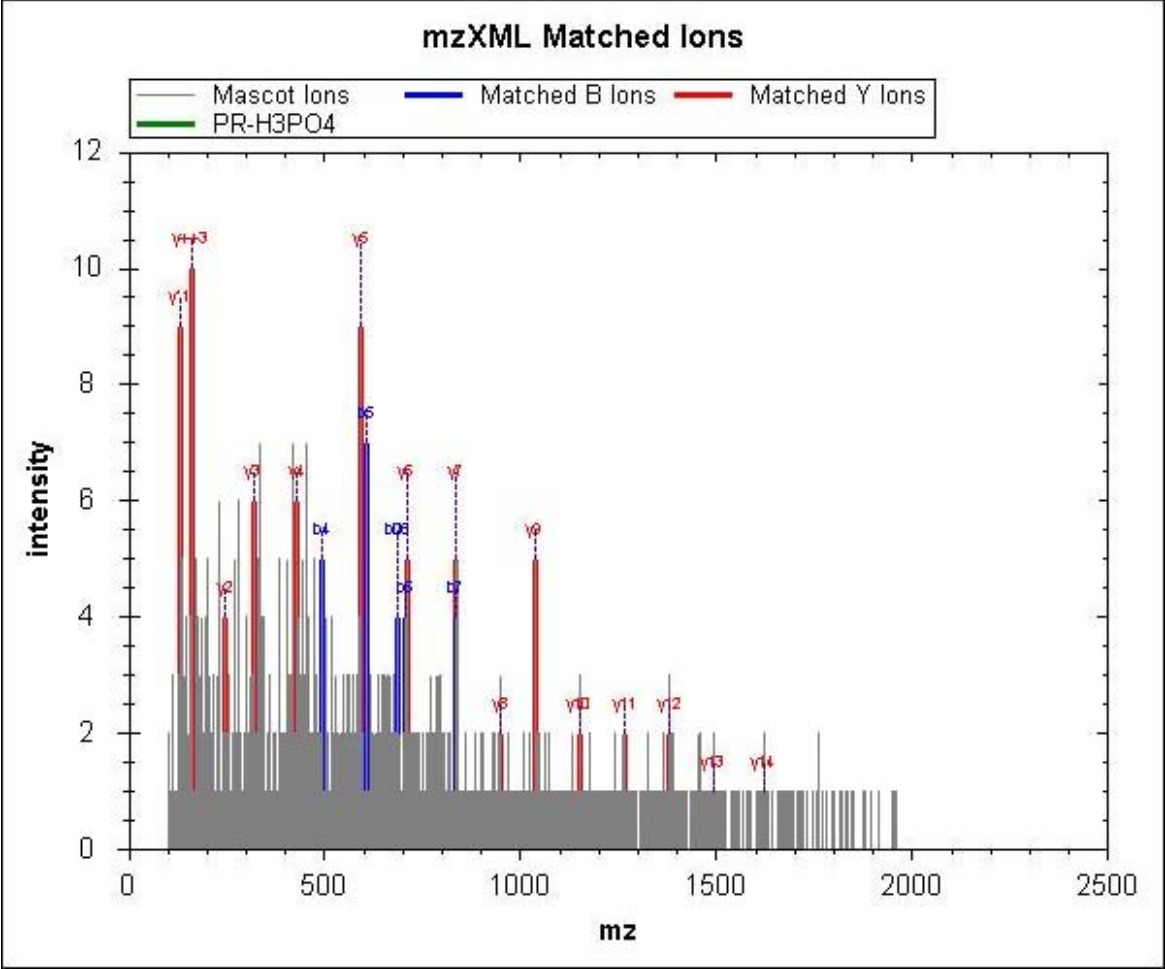

Protein index=1036, ACC No:IP100021793

Peptide index=1721 MS/MS spectrum

Sequence: SHHGEHERPEFIAYPHLR, m/z:553.7683, charge:+ 4, Modification: , Mod Position:

Score: 39.87, Raw data:WET\_A5\_090615\_03.mzxml, MS/MS Elution time: 36.81267, Scan number:1914, Mass delta:-0.0264, Rank:1

| No | b       | b++     | b*      | b*++    | b0      | b0++    | Seq | y       | y++     | y*      | y*++    | y0      | y0++    | RevNo |
|----|---------|---------|---------|---------|---------|---------|-----|---------|---------|---------|---------|---------|---------|-------|
| 1  | 88.04   | 44.52   |         |         | 70.03   | 35.52   | S   |         |         |         |         |         |         | 18    |
| 2  | 225.1   | 113.05  |         |         | 207.09  | 104.05  | H   | 2125.05 | 1063.03 | 2108.02 | 1054.51 | 2107.04 | 1054.02 | 17    |
| 3  | 362.16  | 181.58  |         |         | 344.15  | 172.58  | H   | 1987.99 | 994.5   | 1970.96 | 985.98  | 1969.98 | 985.49  | 16    |
| 4  | 419.18  | 210.09  |         |         | 401.17  | 201.09  | G   | 1850.93 | 925.97  | 1833.9  | 917.46  | 1832.92 | 916.96  | 15    |
| 5  | 548.22  | 274.61  |         |         | 530.21  | 265.61  | E   | 1793.91 | 897.46  | 1776.88 | 888.94  | 1775.9  | 888.45  | 14    |
| 6  | 685.28  | 343.14  |         |         | 667.27  | 334.14  | H   | 1664.87 | 832.94  | 1647.84 | 824.42  | 1646.85 | 823.93  | 13    |
| 7  | 814.32  | 407.66  |         |         | 796.31  | 398.66  | E   | 1527.81 | 764.41  | 1510.78 | 755.89  | 1509.8  | 755.4   | 12    |
| 8  | 970.42  | 485.72  | 953.4   | 477.2   | 952.41  | 476.71  | R   | 1398.76 | 699.89  | 1381.74 | 691.37  | 1380.75 | 690.88  | 11    |
| 9  | 1067.48 | 534.24  | 1050.45 | 525.73  | 1049.47 | 525.24  | P   | 1242.66 | 621.84  | 1225.64 | 613.32  | 1224.65 | 612.83  | 10    |
| 10 | 1196.52 | 598.76  | 1179.49 | 590.25  | 1178.51 | 589.76  | E   | 1145.61 | 573.31  | 1128.58 | 564.8   | 1127.6  | 564.3   | 9     |
| 11 | 1343.59 | 672.3   | 1326.56 | 663.78  | 1325.58 | 663.29  | F   | 1016.57 | 508.79  | 999.54  | 500.27  |         |         | 8     |
| 12 | 1456.67 | 728.84  | 1439.65 | 720.33  | 1438.66 | 719.83  | I   | 869.5   | 435.25  | 852.47  | 426.74  |         |         | 7     |
| 13 | 1527.71 | 764.36  | 1510.68 | 755.84  | 1509.7  | 755.35  | A   | 756.42  | 378.71  | 739.39  | 370.2   |         |         | 6     |
| 14 | 1690.77 | 845.89  | 1673.75 | 837.38  | 1672.76 | 836.88  | Y   | 685.38  | 343.19  | 668.35  | 334.68  |         |         | 5     |
| 15 | 1787.82 | 894.42  | 1770.8  | 885.9   | 1769.81 | 885.41  | P   | 522.31  | 261.66  | 505.29  | 253.15  |         |         | 4     |
| 16 | 1924.88 | 962.95  | 1907.86 | 954.43  | 1906.87 | 953.94  | H   | 425.26  | 213.13  | 408.24  | 204.62  |         |         | 3     |
| 17 | 2037.97 | 1019.49 | 2020.94 | 1010.97 | 2019.96 | 1010.48 | L   | 288.2   | 144.61  | 271.18  | 136.09  |         |         | 2     |
| 18 |         |         |         |         |         |         | R   | 175.12  | 88.06   | 158.09  | 79.55   |         |         | 1     |

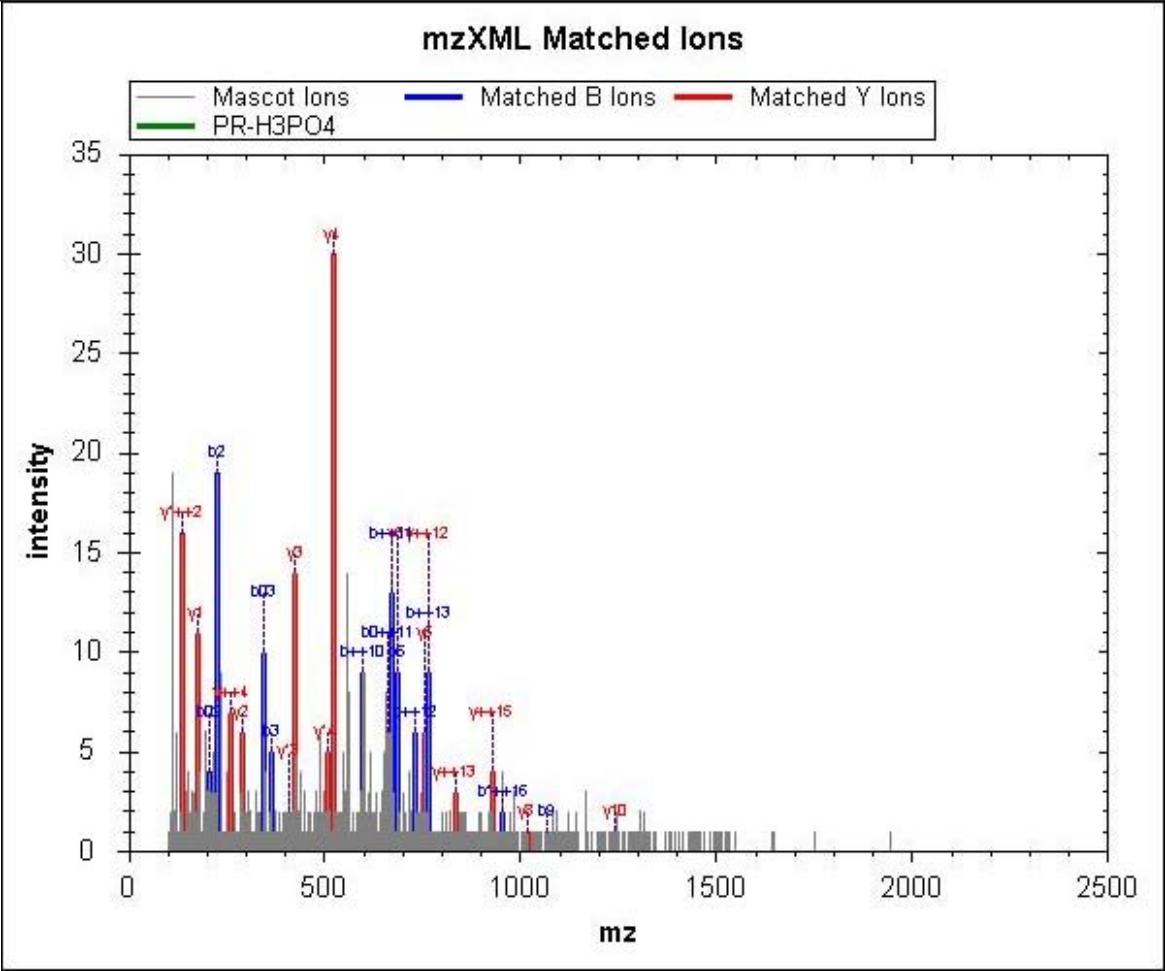

Protein index=1040, ACC No:IPI00010807

Peptide index=1897 MS/MS spectrum

Sequence: LEKLMIR, m/z:459.7629, charge:+ 2, Modification: Oxidation (M), Mod Position: 0.0000100.0

Score: 41.71, Raw data:WET\_A5\_090615\_01.mzxml, MS/MS Elution time: 38.8445, Scan number:2038, Mass delta:-0.0255, Rank:1

| No | b      | b++    | b*     | b*++   | b0     | b0++   | Seq | y      | y++    | y*     | y*++   | y0     | y0++   | RevNo |
|----|--------|--------|--------|--------|--------|--------|-----|--------|--------|--------|--------|--------|--------|-------|
| 1  | 114.09 | 57.55  |        |        |        |        | L   |        |        |        |        |        |        | 7     |
| 2  | 243.13 | 122.07 |        |        | 225.12 | 113.07 | E   | 805.46 | 403.23 | 788.43 | 394.72 | 787.45 | 394.23 | 6     |
| 3  | 371.23 | 186.12 | 354.2  | 177.6  | 353.22 | 177.11 | K   | 676.42 | 338.71 | 659.39 | 330.2  |        |        | 5     |
| 4  | 484.31 | 242.66 | 467.29 | 234.15 | 466.3  | 233.65 | L   | 548.32 | 274.66 | 531.3  | 266.15 |        |        | 4     |
| 5  | 631.35 | 316.18 | 614.32 | 307.66 | 613.34 | 307.17 | M   | 435.24 | 218.12 | 418.21 | 209.61 |        |        | 3     |
| 6  | 744.43 | 372.72 | 727.41 | 364.21 | 726.42 | 363.71 | I   | 288.2  | 144.61 | 271.18 | 136.09 |        |        | 2     |
| 7  |        |        |        |        |        |        | R   | 175.12 | 88.06  | 158.09 | 79.55  |        |        | 1     |

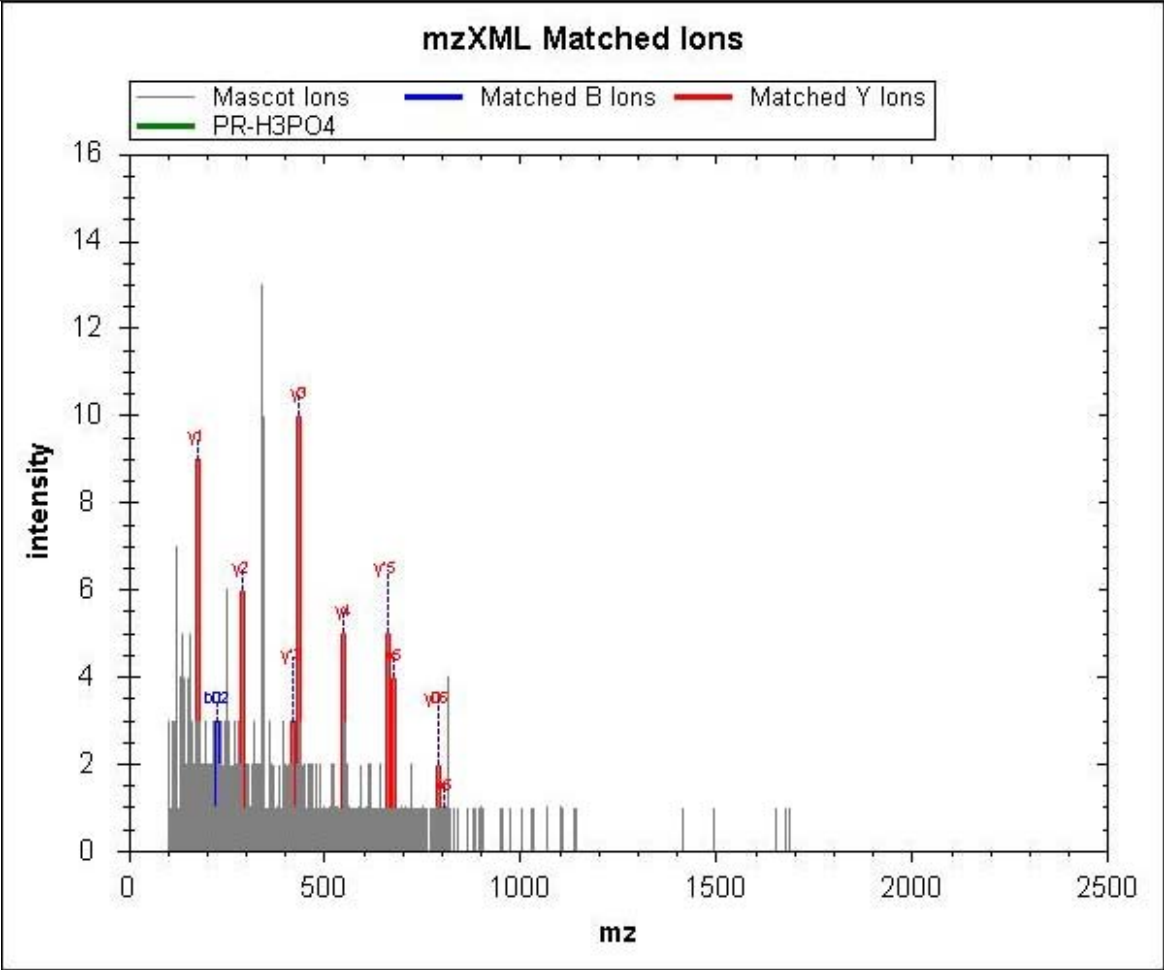

Protein index=1051, ACC No:IPI00026167

Peptide index=1974 MS/MS spectrum

Sequence: QQIQSIQQSIER, m/z:729.379, charge:+ 2, Modification: , Mod Position:

Score: 95.39, Raw data:WET\_B5\_090616\_01.mzxml, MS/MS Elution time: 39.47367, Scan number:2066, Mass delta:-0.0096, Rank:1

| No | b       | b++    | b*      | b*++   | b0      | b0++   | Seq | y       | y++    | y*      | y*++   | y0      | y0++   | RevNo |
|----|---------|--------|---------|--------|---------|--------|-----|---------|--------|---------|--------|---------|--------|-------|
| 1  | 129.07  | 65.04  | 112.04  | 56.52  |         |        | Q   |         |        |         |        |         |        | 12    |
| 2  | 257.12  | 129.07 | 240.1   | 120.55 |         |        | Q   | 1329.71 | 665.36 | 1312.69 | 656.85 | 1311.7  | 656.35 | 11    |
| 3  | 370.21  | 185.61 | 353.18  | 177.09 |         |        | I   | 1201.65 | 601.33 | 1184.63 | 592.82 | 1183.64 | 592.33 | 10    |
| 4  | 498.27  | 249.64 | 481.24  | 241.12 |         |        | Q   | 1088.57 | 544.79 | 1071.54 | 536.28 | 1070.56 | 535.78 | 9     |
| 5  | 585.3   | 293.15 | 568.27  | 284.64 | 567.29  | 284.15 | S   | 960.51  | 480.76 | 943.48  | 472.25 | 942.5   | 471.75 | 8     |
| 6  | 698.38  | 349.7  | 681.36  | 341.18 | 680.37  | 340.69 | I   | 873.48  | 437.24 | 856.45  | 428.73 | 855.47  | 428.24 | 7     |
| 7  | 826.44  | 413.72 | 809.42  | 405.21 | 808.43  | 404.72 | Q   | 760.39  | 380.7  | 743.37  | 372.19 | 742.38  | 371.7  | 6     |
| 8  | 954.5   | 477.75 | 937.47  | 469.24 | 936.49  | 468.75 | Q   | 632.34  | 316.67 | 615.31  | 308.16 | 614.33  | 307.67 | 5     |
| 9  | 1041.53 | 521.27 | 1024.51 | 512.76 | 1023.52 | 512.26 | S   | 504.28  | 252.64 | 487.25  | 244.13 | 486.27  | 243.64 | 4     |
| 10 | 1154.62 | 577.81 | 1137.59 | 569.3  | 1136.61 | 568.81 | I   | 417.25  | 209.13 | 400.22  | 200.61 | 399.24  | 200.12 | 3     |
| 11 | 1283.66 | 642.33 | 1266.63 | 633.82 | 1265.65 | 633.33 | E   | 304.16  | 152.58 | 287.13  | 144.07 | 286.15  | 143.58 | 2     |
| 12 |         |        |         |        |         |        | R   | 175.12  | 88.06  | 158.09  | 79.55  |         |        | 1     |

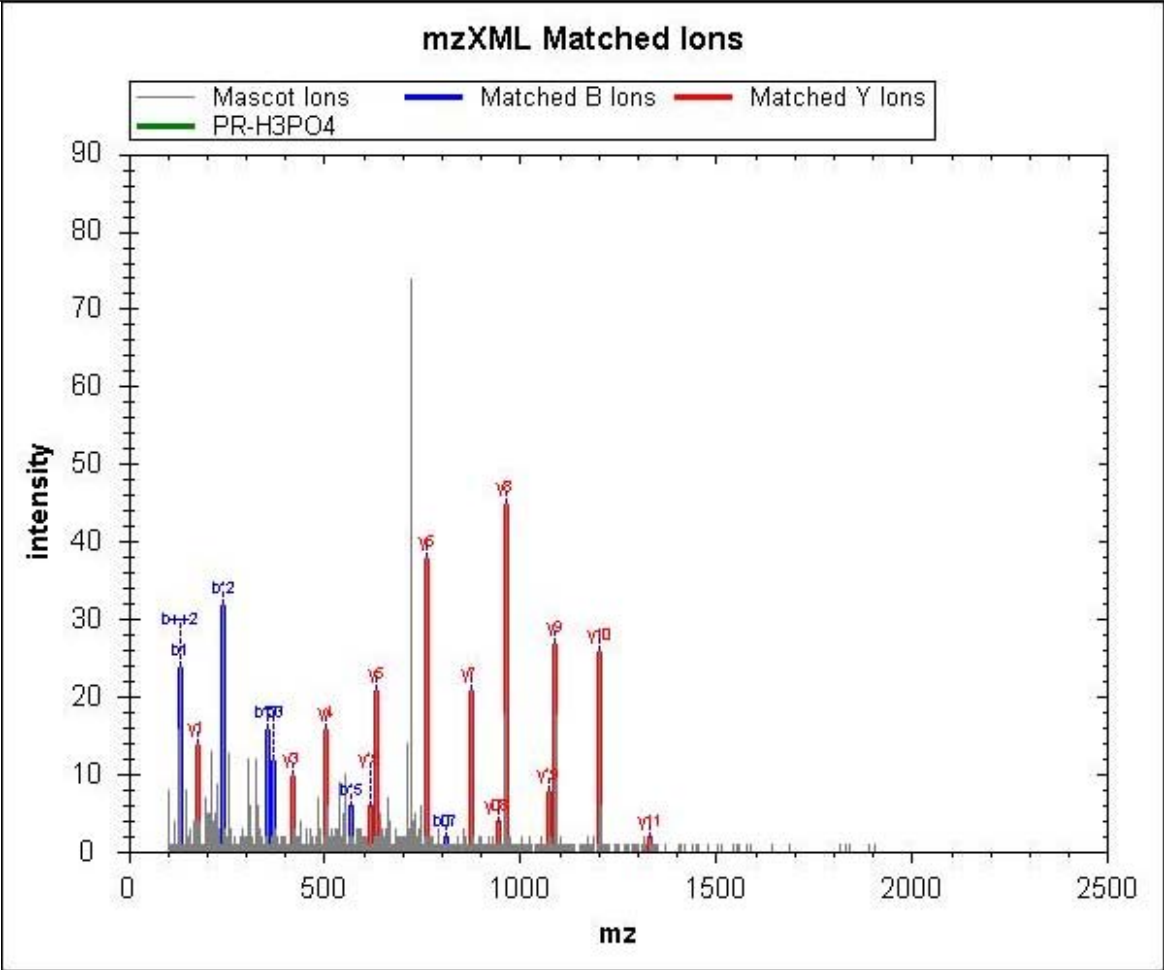

Protein index=1052, ACC No:IPI00140827

Peptide index=1612 MS/MS spectrum

Sequence: VAGQDGSVVQFK, m/z:617.8225, charge:+ 2, Modification: , Mod Position:

Score: 77.3, Raw data:WET\_A5\_090615\_01.mzxml, MS/MS Elution time: 35.35433, Scan number:1834, Mass delta:-0.005, Rank:1

| No | b       | b++    | b*      | b*++   | b0      | b0++   | Seq | y       | y++    | y*      | y*++   | y0      | y0++   | RevNo |
|----|---------|--------|---------|--------|---------|--------|-----|---------|--------|---------|--------|---------|--------|-------|
| 1  | 100.08  | 50.54  |         |        |         |        | V   |         |        |         |        |         |        | 12    |
| 2  | 171.11  | 86.06  |         |        |         |        | A   | 1135.57 | 568.29 | 1118.55 | 559.78 | 1117.56 | 559.29 | 11    |
| 3  | 228.13  | 114.57 |         |        |         |        | G   | 1064.54 | 532.77 | 1047.51 | 524.26 | 1046.53 | 523.77 | 10    |
| 4  | 356.19  | 178.6  | 339.17  | 170.09 |         |        | Q   | 1007.52 | 504.26 | 990.49  | 495.75 | 989.51  | 495.26 | 9     |
| 5  | 471.22  | 236.11 | 454.19  | 227.6  | 453.21  | 227.11 | D   | 879.46  | 440.23 | 862.43  | 431.72 | 861.45  | 431.23 | 8     |
| 6  | 528.24  | 264.62 | 511.21  | 256.11 | 510.23  | 255.62 | G   | 764.43  | 382.72 | 747.4   | 374.21 | 746.42  | 373.71 | 7     |
| 7  | 615.27  | 308.14 | 598.25  | 299.63 | 597.26  | 299.14 | S   | 707.41  | 354.21 | 690.38  | 345.69 | 689.4   | 345.2  | 6     |
| 8  | 714.34  | 357.67 | 697.32  | 349.16 | 696.33  | 348.67 | V   | 620.38  | 310.69 | 603.35  | 302.18 |         |        | 5     |
| 9  | 813.41  | 407.21 | 796.38  | 398.7  | 795.4   | 398.2  | V   | 521.31  | 261.16 | 504.28  | 252.64 |         |        | 4     |
| 10 | 941.47  | 471.24 | 924.44  | 462.72 | 923.46  | 462.23 | Q   | 422.24  | 211.62 | 405.21  | 203.11 |         |        | 3     |
| 11 | 1088.54 | 544.77 | 1071.51 | 536.26 | 1070.53 | 535.77 | F   | 294.18  | 147.59 | 277.15  | 139.08 |         |        | 2     |
| 12 |         |        |         |        |         |        | K   | 147.11  | 74.06  | 130.09  | 65.55  |         |        | 1     |

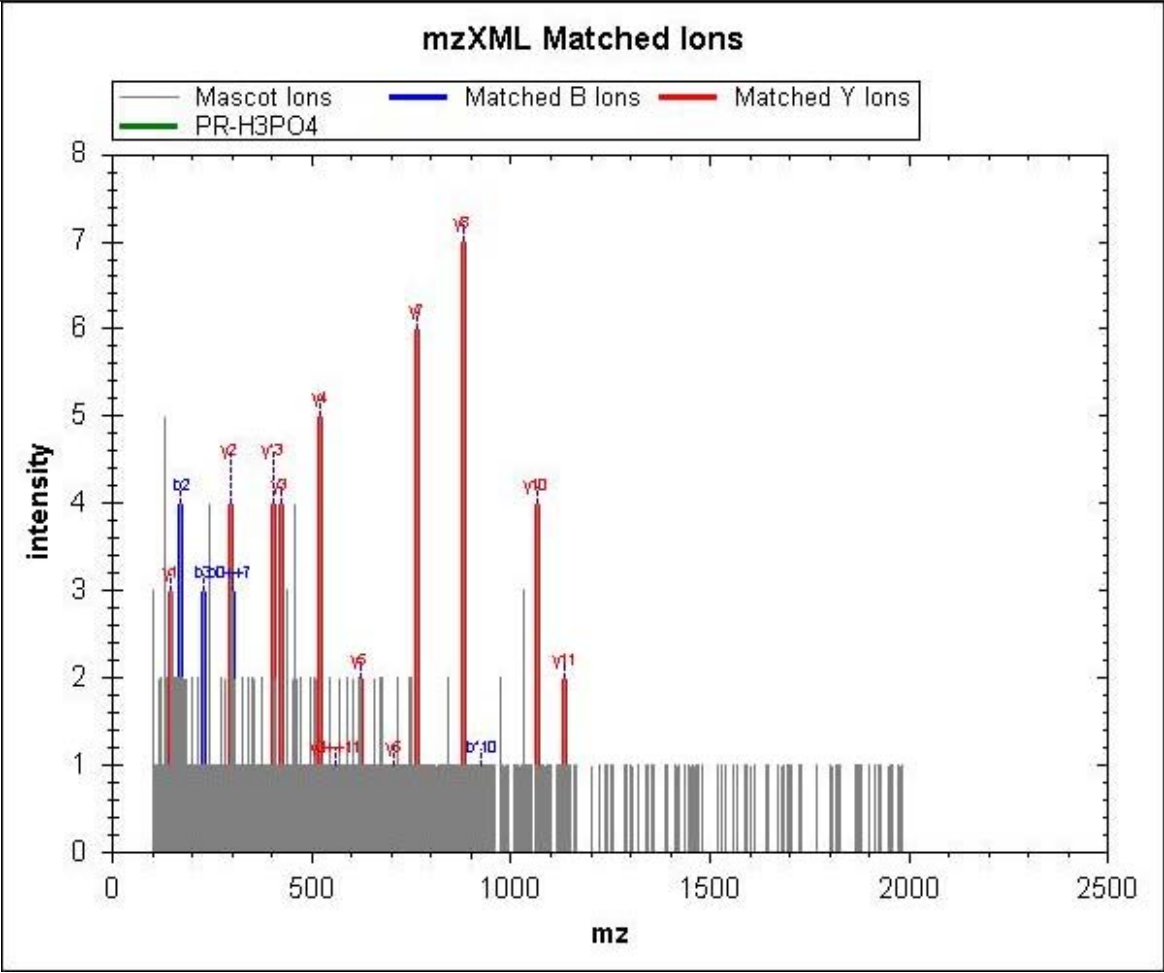

Protein index=1054, ACC No:IP100000335

Peptide index=5707 MS/MS spectrum

Sequence: ISQAEEDQQLLGHLLLVAK, m/z:745.4025, charge:+ 3, Modification: , Mod Position:

Score: 33.62, Raw data:WET\_A5\_090615\_02.mzxml, MS/MS Elution time: 77.07933, Scan number:4270, Mass delta:0.0096, Rank:1

| No | b       | b++     | b*      | b*++    | b0      | b0++    | Seq | y       | y++     | y*      | y*++    | y0      | y0++    | RevNo |
|----|---------|---------|---------|---------|---------|---------|-----|---------|---------|---------|---------|---------|---------|-------|
| 1  | 114.09  | 57.55   |         |         |         |         | I   |         |         |         |         |         |         | 20    |
| 2  | 201.12  | 101.07  |         |         | 183.11  | 92.06   | S   | 2121.12 | 1061.06 | 2104.09 | 1052.55 | 2103.11 | 1052.06 | 19    |
| 3  | 329.18  | 165.09  | 312.16  | 156.58  | 311.17  | 156.09  | Q   | 2034.09 | 1017.55 | 2017.06 | 1009.03 | 2016.08 | 1008.54 | 18    |
| 4  | 400.22  | 200.61  | 383.19  | 192.1   | 382.21  | 191.61  | A   | 1906.03 | 953.52  | 1889    | 945     | 1888.02 | 944.51  | 17    |
| 5  | 529.26  | 265.13  | 512.24  | 256.62  | 511.25  | 256.13  | E   | 1834.99 | 918     | 1817.96 | 909.49  | 1816.98 | 908.99  | 16    |
| 6  | 658.3   | 329.66  | 641.28  | 321.14  | 640.29  | 320.65  | E   | 1705.95 | 853.48  | 1688.92 | 844.96  | 1687.94 | 844.47  | 15    |
| 7  | 787.35  | 394.18  | 770.32  | 385.66  | 769.34  | 385.17  | E   | 1576.91 | 788.96  | 1559.88 | 780.44  | 1558.9  | 779.95  | 14    |
| 8  | 902.37  | 451.69  | 885.35  | 443.18  | 884.36  | 442.69  | D   | 1447.86 | 724.44  | 1430.84 | 715.92  | 1429.85 | 715.43  | 13    |
| 9  | 1030.43 | 515.72  | 1013.41 | 507.21  | 1012.42 | 506.71  | Q   | 1332.84 | 666.92  | 1315.81 | 658.41  |         |         | 12    |
| 10 | 1158.49 | 579.75  | 1141.46 | 571.24  | 1140.48 | 570.74  | Q   | 1204.78 | 602.89  | 1187.75 | 594.38  |         |         | 11    |
| 11 | 1271.58 | 636.29  | 1254.55 | 627.78  | 1253.56 | 627.29  | L   | 1076.72 | 538.86  | 1059.69 | 530.35  |         |         | 10    |
| 12 | 1384.66 | 692.83  | 1367.63 | 684.32  | 1366.65 | 683.83  | L   | 963.63  | 482.32  | 946.61  | 473.81  |         |         | 9     |
| 13 | 1441.68 | 721.34  | 1424.65 | 712.83  | 1423.67 | 712.34  | G   | 850.55  | 425.78  | 833.52  | 417.27  |         |         | 8     |
| 14 | 1578.74 | 789.87  | 1561.71 | 781.36  | 1560.73 | 780.87  | H   | 793.53  | 397.27  | 776.5   | 388.76  |         |         | 7     |
| 15 | 1691.82 | 846.42  | 1674.8  | 837.9   | 1673.81 | 837.41  | L   | 656.47  | 328.74  | 639.44  | 320.23  |         |         | 6     |
| 16 | 1804.91 | 902.96  | 1787.88 | 894.44  | 1786.9  | 893.95  | L   | 543.39  | 272.2   | 526.36  | 263.68  |         |         | 5     |
| 17 | 1917.99 | 959.5   | 1900.97 | 950.99  | 1899.98 | 950.49  | L   | 430.3   | 215.65  | 413.28  | 207.14  |         |         | 4     |
| 18 | 2017.06 | 1009.03 | 2000.03 | 1000.52 | 1999.05 | 1000.03 | V   | 317.22  | 159.11  | 300.19  | 150.6   |         |         | 3     |
| 19 | 2088.1  | 1044.55 | 2071.07 | 1036.04 | 2070.09 | 1035.55 | A   | 218.15  | 109.58  | 201.12  | 101.07  |         |         | 2     |
| 20 |         |         |         |         |         |         | K   | 147.11  | 74.06   | 130.09  | 65.55   |         |         | 1     |

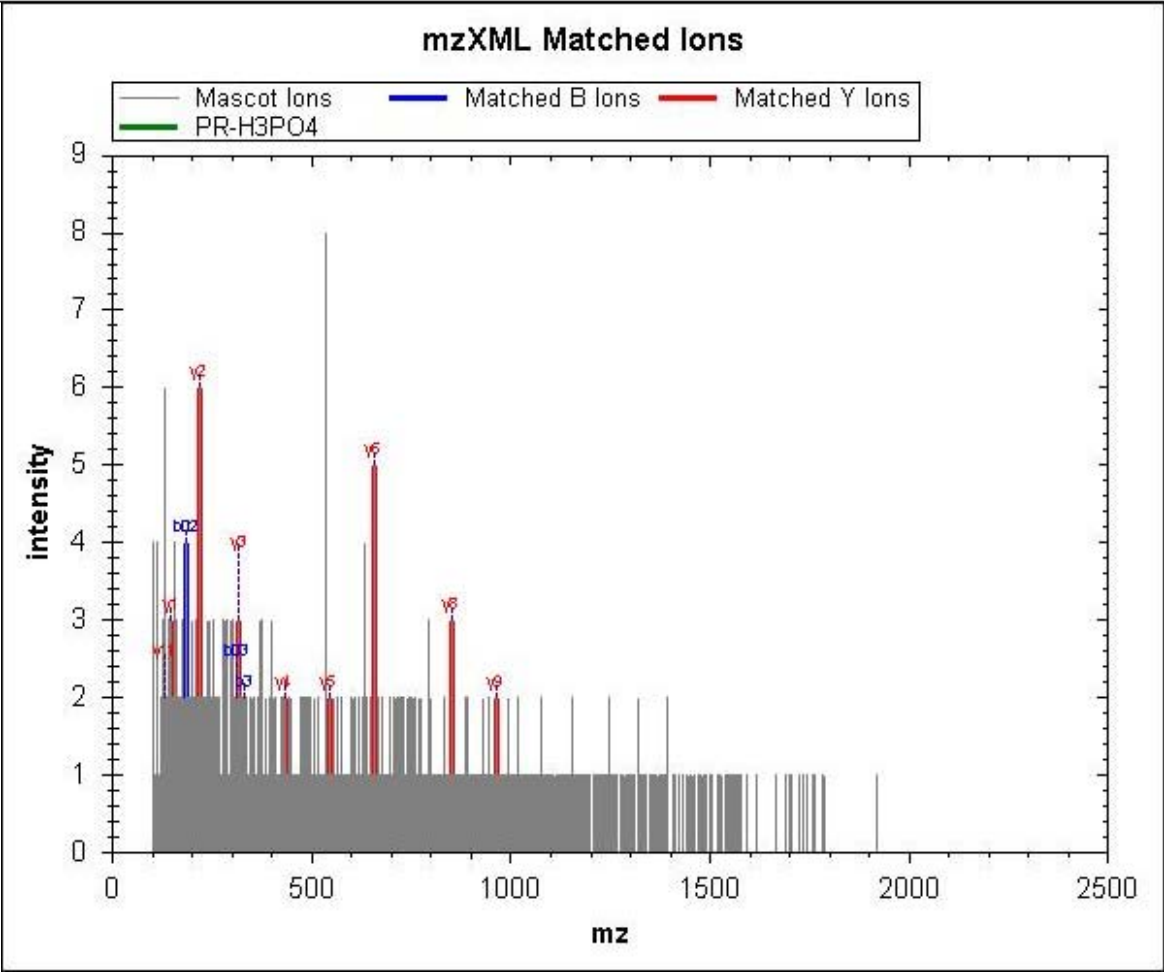

Protein index=1061, ACC No: IPI00008527

Peptide index=6046 MS/MS spectrum

Sequence: AAGVNVEPFWPGLFAK, m/z:851.9531, charge: + 2, Modification: , Mod Position:

Score: 54.4, Raw data: WET\_B5\_090616\_01.mzxml, MS/MS Elution time: 81.64066, Scan number: 4515, Mass delta: 0.0028, Rank: 1

| No | b       | b++    | b*      | b*++   | b0      | b0++   | Seq | y       | y++    | y*      | y*++   | y0      | y0++   | RevNo |
|----|---------|--------|---------|--------|---------|--------|-----|---------|--------|---------|--------|---------|--------|-------|
| 1  | 72.04   | 36.53  |         |        |         |        | A   |         |        |         |        |         |        | 16    |
| 2  | 143.08  | 72.04  |         |        |         |        | A   | 1631.86 | 816.43 | 1614.83 | 807.92 | 1613.85 | 807.43 | 15    |
| 3  | 200.1   | 100.56 |         |        |         |        | G   | 1560.82 | 780.91 | 1543.79 | 772.4  | 1542.81 | 771.91 | 14    |
| 4  | 299.17  | 150.09 |         |        |         |        | V   | 1503.8  | 752.4  | 1486.77 | 743.89 | 1485.79 | 743.4  | 13    |
| 5  | 413.21  | 207.11 | 396.19  | 198.6  |         |        | N   | 1404.73 | 702.87 | 1387.7  | 694.36 | 1386.72 | 693.86 | 12    |
| 6  | 512.28  | 256.65 | 495.26  | 248.13 |         |        | V   | 1290.69 | 645.85 | 1273.66 | 637.33 | 1272.68 | 636.84 | 11    |
| 7  | 641.33  | 321.17 | 624.3   | 312.65 | 623.31  | 312.16 | E   | 1191.62 | 596.31 | 1174.59 | 587.8  | 1173.61 | 587.31 | 10    |
| 8  | 738.38  | 369.69 | 721.35  | 361.18 | 720.37  | 360.69 | P   | 1062.58 | 531.79 | 1045.55 | 523.28 |         |        | 9     |
| 9  | 885.45  | 443.23 | 868.42  | 434.71 | 867.44  | 434.22 | F   | 965.52  | 483.27 | 948.5   | 474.75 |         |        | 8     |
| 10 | 1071.53 | 536.27 | 1054.5  | 527.75 | 1053.52 | 527.26 | W   | 818.46  | 409.73 | 801.43  | 401.22 |         |        | 7     |
| 11 | 1168.58 | 584.79 | 1151.55 | 576.28 | 1150.57 | 575.79 | P   | 632.38  | 316.69 | 615.35  | 308.18 |         |        | 6     |
| 12 | 1225.6  | 613.3  | 1208.57 | 604.79 | 1207.59 | 604.3  | G   | 535.32  | 268.17 | 518.3   | 259.65 |         |        | 5     |

|    |         |        |         |        |         |        |   |        |        |        |        |  |  |   |
|----|---------|--------|---------|--------|---------|--------|---|--------|--------|--------|--------|--|--|---|
| 13 | 1338.68 | 669.85 | 1321.66 | 661.33 | 1320.67 | 660.84 | L | 478.3  | 239.65 | 461.28 | 231.14 |  |  | 4 |
| 14 | 1485.75 | 743.38 | 1468.73 | 734.87 | 1467.74 | 734.37 | F | 365.22 | 183.11 | 348.19 | 174.6  |  |  | 3 |
| 15 | 1556.79 | 778.9  | 1539.76 | 770.39 | 1538.78 | 769.89 | A | 218.15 | 109.58 | 201.12 | 101.07 |  |  | 2 |
| 16 |         |        |         |        |         |        | K | 147.11 | 74.06  | 130.09 | 65.55  |  |  | 1 |

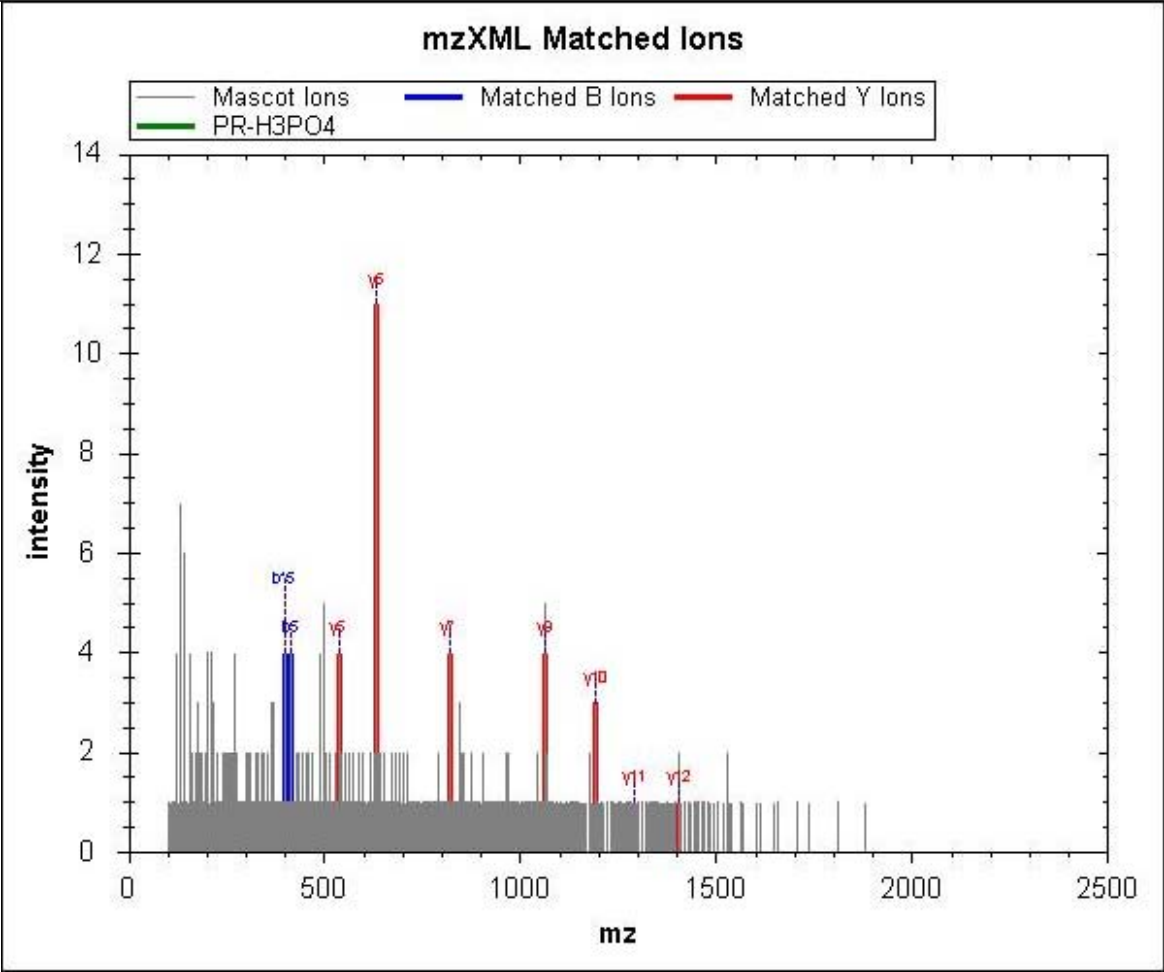

Protein index=1064, ACC No: IPI00017704

Peptide index=6592 MS/MS spectrum

Sequence: FALITWIGENVSGQLQR, m/z:902.4942, charge:+ 2, Modification: , Mod Position:

Score: 75.11, Raw data:WET\_A5\_090615\_03.mzxml, MS/MS Elution time: 91.7335, Scan number:5130, Mass delta:0.0032, Rank:1

| No | b      | b++    | b* | b*++ | b0     | b0++   | Seq | y       | y++    | y*      | y*++   | y0      | y0++   | RevNo |
|----|--------|--------|----|------|--------|--------|-----|---------|--------|---------|--------|---------|--------|-------|
| 1  | 148.08 | 74.54  |    |      |        |        | F   |         |        |         |        |         |        | 16    |
| 2  | 219.11 | 110.06 |    |      |        |        | A   | 1656.91 | 828.96 | 1639.88 | 820.44 | 1638.9  | 819.95 | 15    |
| 3  | 332.2  | 166.6  |    |      |        |        | L   | 1585.87 | 793.44 | 1568.84 | 784.93 | 1567.86 | 784.43 | 14    |
| 4  | 445.28 | 223.14 |    |      |        |        | I   | 1472.79 | 736.9  | 1455.76 | 728.38 | 1454.78 | 727.89 | 13    |
| 5  | 546.33 | 273.67 |    |      | 528.32 | 264.66 | T   | 1359.7  | 680.35 | 1342.68 | 671.84 | 1341.69 | 671.35 | 12    |
| 6  | 732.41 | 366.71 |    |      | 714.4  | 357.7  | W   | 1258.65 | 629.83 | 1241.63 | 621.32 | 1240.64 | 620.83 | 11    |
| 7  | 845.49 | 423.25 |    |      | 827.48 | 414.24 | I   | 1072.57 | 536.79 | 1055.55 | 528.28 | 1054.56 | 527.79 | 10    |
| 8  | 902.51 | 451.76 |    |      | 884.5  | 442.76 | G   | 959.49  | 480.25 | 942.46  | 471.74 | 941.48  | 471.24 | 9     |

|    |         |        |         |        |         |        |   |        |        |        |        |        |        |   |
|----|---------|--------|---------|--------|---------|--------|---|--------|--------|--------|--------|--------|--------|---|
| 9  | 1031.56 | 516.28 |         |        | 1013.55 | 507.28 | E | 902.47 | 451.74 | 885.44 | 443.22 | 884.46 | 442.73 | 8 |
| 10 | 1145.6  | 573.3  | 1128.57 | 564.79 | 1127.59 | 564.3  | N | 773.43 | 387.22 | 756.4  | 378.7  | 755.42 | 378.21 | 7 |
| 11 | 1244.67 | 622.84 | 1227.64 | 614.32 | 1226.66 | 613.83 | V | 659.38 | 330.2  | 642.36 | 321.68 | 641.37 | 321.19 | 6 |
| 12 | 1331.7  | 666.35 | 1314.67 | 657.84 | 1313.69 | 657.35 | S | 560.32 | 280.66 | 543.29 | 272.15 | 542.3  | 271.66 | 5 |
| 13 | 1388.72 | 694.86 | 1371.69 | 686.35 | 1370.71 | 685.86 | G | 473.28 | 237.15 | 456.26 | 228.63 |        |        | 4 |
| 14 | 1501.8  | 751.41 | 1484.78 | 742.89 | 1483.79 | 742.4  | L | 416.26 | 208.63 | 399.24 | 200.12 |        |        | 3 |
| 15 | 1629.86 | 815.44 | 1612.84 | 806.92 | 1611.85 | 806.43 | Q | 303.18 | 152.09 | 286.15 | 143.58 |        |        | 2 |
| 16 |         |        |         |        |         |        | R | 175.12 | 88.06  | 158.09 | 79.55  |        |        | 1 |

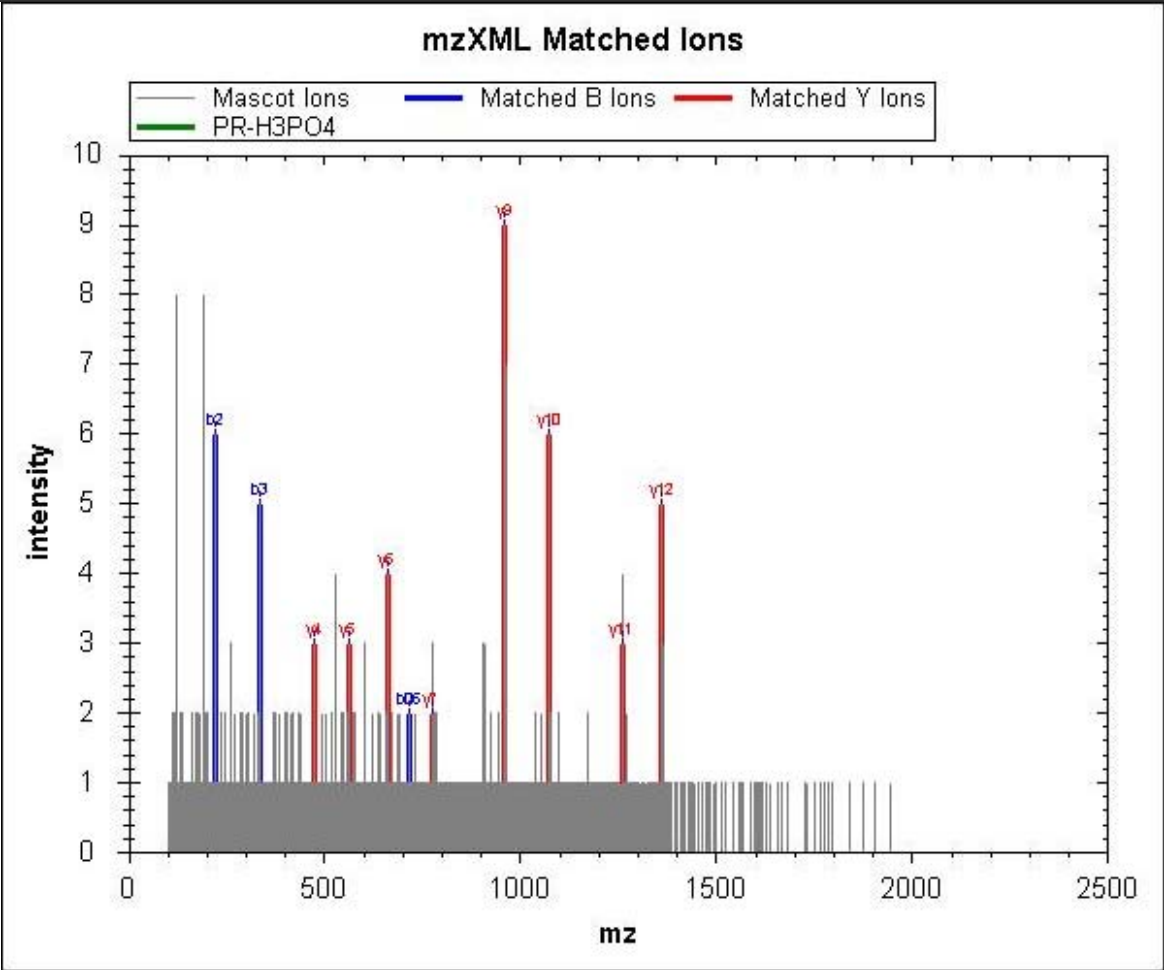

Protein index=1068, ACC No:IPI00219446

Peptide index=2689 MS/MS spectrum

Sequence: NRPTISWDGLDSGK, m/z:816.9043, charge:+ 2, Modification: , Mod Position:

Score: 69.69, Raw data:WET\_A5\_090615\_01.mzxml, MS/MS Elution time: 46.376, Scan number:2479, Mass delta:0.0037, Rank:1

| No | b      | b++    | b*     | b*++   | b0     | b0++   | Seq | y       | y++    | y*      | y*++   | y0      | y0++   | RevNo |
|----|--------|--------|--------|--------|--------|--------|-----|---------|--------|---------|--------|---------|--------|-------|
| 1  | 115.05 | 58.03  | 98.02  | 49.52  |        |        | N   |         |        |         |        |         |        | 15    |
| 2  | 271.15 | 136.08 | 254.12 | 127.57 |        |        | R   | 1518.75 | 759.88 | 1501.73 | 751.37 | 1500.74 | 750.88 | 14    |
| 3  | 368.2  | 184.61 | 351.18 | 176.09 |        |        | P   | 1362.65 | 681.83 | 1345.63 | 673.32 | 1344.64 | 672.83 | 13    |
| 4  | 469.25 | 235.13 | 452.23 | 226.62 | 451.24 | 226.12 | T   | 1265.6  | 633.3  | 1248.57 | 624.79 | 1247.59 | 624.3  | 12    |

|    |         |        |         |        |         |        |   |         |        |         |        |         |        |    |
|----|---------|--------|---------|--------|---------|--------|---|---------|--------|---------|--------|---------|--------|----|
| 5  | 556.28  | 278.65 | 539.26  | 270.13 | 538.27  | 269.64 | S | 1164.55 | 582.78 | 1147.53 | 574.27 | 1146.54 | 573.77 | 11 |
| 6  | 669.37  | 335.19 | 652.34  | 326.67 | 651.36  | 326.18 | I | 1077.52 | 539.26 | 1060.49 | 530.75 | 1059.51 | 530.26 | 10 |
| 7  | 756.4   | 378.7  | 739.37  | 370.19 | 738.39  | 369.7  | S | 964.44  | 482.72 | 947.41  | 474.21 | 946.43  | 473.72 | 9  |
| 8  | 942.48  | 471.74 | 925.45  | 463.23 | 924.47  | 462.74 | W | 877.41  | 439.21 | 860.38  | 430.69 | 859.39  | 430.2  | 8  |
| 9  | 1057.51 | 529.26 | 1040.48 | 520.74 | 1039.5  | 520.25 | D | 691.33  | 346.17 | 674.3   | 337.65 | 673.32  | 337.16 | 7  |
| 10 | 1114.53 | 557.77 | 1097.5  | 549.25 | 1096.52 | 548.76 | G | 576.3   | 288.65 | 559.27  | 280.14 | 558.29  | 279.65 | 6  |
| 11 | 1227.61 | 614.31 | 1210.59 | 605.8  | 1209.6  | 605.3  | L | 519.28  | 260.14 | 502.25  | 251.63 | 501.27  | 251.14 | 5  |
| 12 | 1342.64 | 671.82 | 1325.61 | 663.31 | 1324.63 | 662.82 | D | 406.19  | 203.6  | 389.17  | 195.09 | 388.18  | 194.59 | 4  |
| 13 | 1429.67 | 715.34 | 1412.64 | 706.83 | 1411.66 | 706.33 | S | 291.17  | 146.09 | 274.14  | 137.57 | 273.16  | 137.08 | 3  |
| 14 | 1486.69 | 743.85 | 1469.67 | 735.34 | 1468.68 | 734.84 | G | 204.13  | 102.57 | 187.11  | 94.06  |         |        | 2  |
| 15 |         |        |         |        |         |        | K | 147.11  | 74.06  | 130.09  | 65.55  |         |        | 1  |

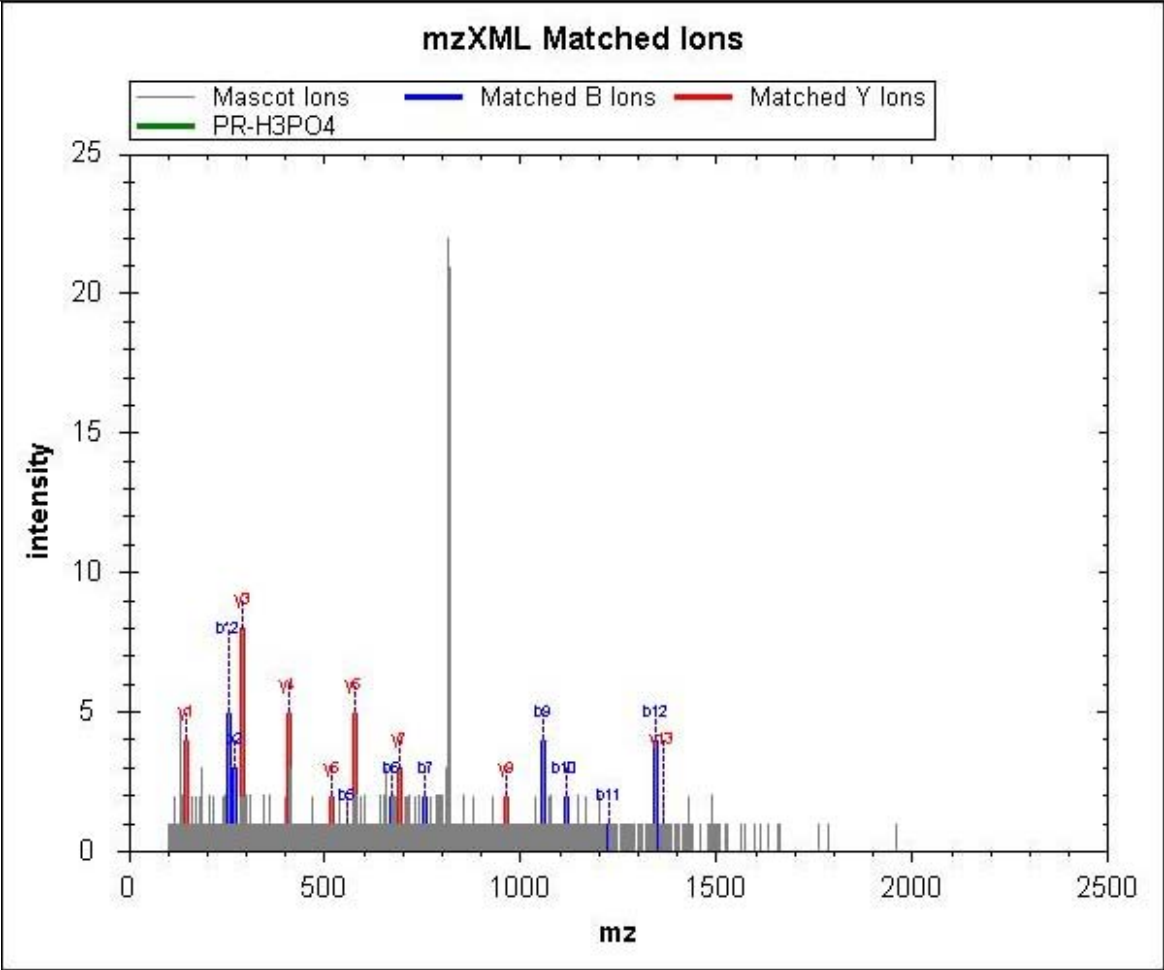

Protein index=1069, ACC No: IPI00005740

Peptide index=2098 MS/MS spectrum

Sequence: ISASLLDSR, m/z:481.2681, charge:+ 2, Modification: , Mod Position:

Score: 59.08, Raw data:WET\_A5\_090615\_01.mzxml, MS/MS Elution time: 40.84417, Scan number:2155, Mass delta:-0.0023, Rank:1

| No | b      | b++   | b0 | b0++ | Seq | y | y++ | y* | y*++ | y0 | y0++ | RevNo |
|----|--------|-------|----|------|-----|---|-----|----|------|----|------|-------|
| 1  | 114.09 | 57.55 |    |      | I   |   |     |    |      |    |      | 9     |

|   |        |        |        |        |   |        |        |        |        |        |        |   |
|---|--------|--------|--------|--------|---|--------|--------|--------|--------|--------|--------|---|
| 2 | 201.12 | 101.07 | 183.11 | 92.06  | S | 848.45 | 424.73 | 831.42 | 416.21 | 830.44 | 415.72 | 8 |
| 3 | 272.16 | 136.58 | 254.15 | 127.58 | A | 761.42 | 381.21 | 744.39 | 372.7  | 743.4  | 372.21 | 7 |
| 4 | 359.19 | 180.1  | 341.18 | 171.09 | S | 690.38 | 345.69 | 673.35 | 337.18 | 672.37 | 336.69 | 6 |
| 5 | 472.28 | 236.64 | 454.27 | 227.64 | L | 603.35 | 302.18 | 586.32 | 293.66 | 585.34 | 293.17 | 5 |
| 6 | 585.36 | 293.18 | 567.35 | 284.18 | L | 490.26 | 245.63 | 473.24 | 237.12 | 472.25 | 236.63 | 4 |
| 7 | 700.39 | 350.7  | 682.38 | 341.69 | D | 377.18 | 189.09 | 360.15 | 180.58 | 359.17 | 180.09 | 3 |
| 8 | 787.42 | 394.21 | 769.41 | 385.21 | S | 262.15 | 131.58 | 245.12 | 123.07 | 244.14 | 122.57 | 2 |
| 9 |        |        |        |        | R | 175.12 | 88.06  | 158.09 | 79.55  |        |        | 1 |

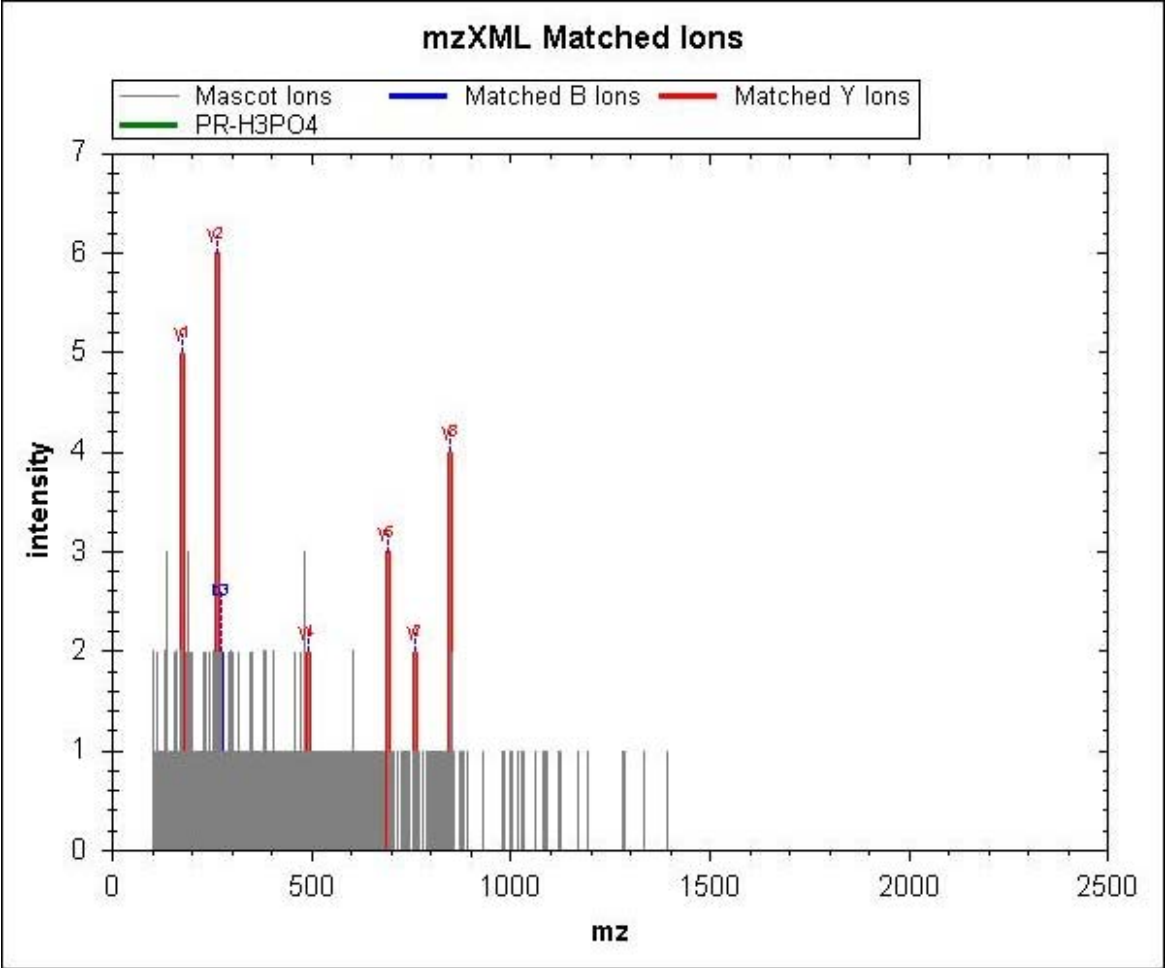

Protein index=1070, ACC No: IPI00413587

Peptide index=7030 MS/MS spectrum

Sequence: DLATALEQLLQAYPR, m/z:851.4706, charge:+ 2, Modification: , Mod Position:

Score: 92.37, Raw data:WET\_B5\_090616\_02.mzxml, MS/MS Elution time: 104.199, Scan number:5883, Mass delta:0.0116, Rank:1

| No | b      | b++    | b* | b*++ | b0     | b0++   | Seq | y       | y++    | y*      | y*++   | y0      | y0++   | RevNo |
|----|--------|--------|----|------|--------|--------|-----|---------|--------|---------|--------|---------|--------|-------|
| 1  | 116.03 | 58.52  |    |      | 98.02  | 49.52  | D   |         |        |         |        |         |        | 15    |
| 2  | 229.12 | 115.06 |    |      | 211.11 | 106.06 | L   | 1586.89 | 793.95 | 1569.86 | 785.44 | 1568.88 | 784.94 | 14    |
| 3  | 300.16 | 150.58 |    |      | 282.14 | 141.58 | A   | 1473.81 | 737.41 | 1456.78 | 728.89 | 1455.8  | 728.4  | 13    |
| 4  | 401.2  | 201.11 |    |      | 383.19 | 192.1  | T   | 1402.77 | 701.89 | 1385.74 | 693.37 | 1384.76 | 692.88 | 12    |

|    |         |        |         |        |         |        |   |         |        |         |        |         |        |    |
|----|---------|--------|---------|--------|---------|--------|---|---------|--------|---------|--------|---------|--------|----|
| 5  | 472.24  | 236.62 |         |        | 454.23  | 227.62 | A | 1301.72 | 651.36 | 1284.69 | 642.85 | 1283.71 | 642.36 | 11 |
| 6  | 585.32  | 293.17 |         |        | 567.31  | 284.16 | L | 1230.68 | 615.85 | 1213.66 | 607.33 | 1212.67 | 606.84 | 10 |
| 7  | 714.37  | 357.69 |         |        | 696.36  | 348.68 | E | 1117.6  | 559.3  | 1100.57 | 550.79 | 1099.59 | 550.3  | 9  |
| 8  | 842.43  | 421.72 | 825.4   | 413.2  | 824.41  | 412.71 | Q | 988.56  | 494.78 | 971.53  | 486.27 |         |        | 8  |
| 9  | 955.51  | 478.26 | 938.48  | 469.75 | 937.5   | 469.25 | L | 860.5   | 430.75 | 843.47  | 422.24 |         |        | 7  |
| 10 | 1068.59 | 534.8  | 1051.57 | 526.29 | 1050.58 | 525.8  | L | 747.41  | 374.21 | 730.39  | 365.7  |         |        | 6  |
| 11 | 1196.65 | 598.83 | 1179.63 | 590.32 | 1178.64 | 589.82 | Q | 634.33  | 317.67 | 617.3   | 309.16 |         |        | 5  |
| 12 | 1267.69 | 634.35 | 1250.66 | 625.84 | 1249.68 | 625.34 | A | 506.27  | 253.64 | 489.25  | 245.13 |         |        | 4  |
| 13 | 1430.75 | 715.88 | 1413.73 | 707.37 | 1412.74 | 706.87 | Y | 435.24  | 218.12 | 418.21  | 209.61 |         |        | 3  |
| 14 | 1527.81 | 764.41 | 1510.78 | 755.89 | 1509.79 | 755.4  | P | 272.17  | 136.59 | 255.15  | 128.08 |         |        | 2  |
| 15 |         |        |         |        |         |        | R | 175.12  | 88.06  | 158.09  | 79.55  |         |        | 1  |

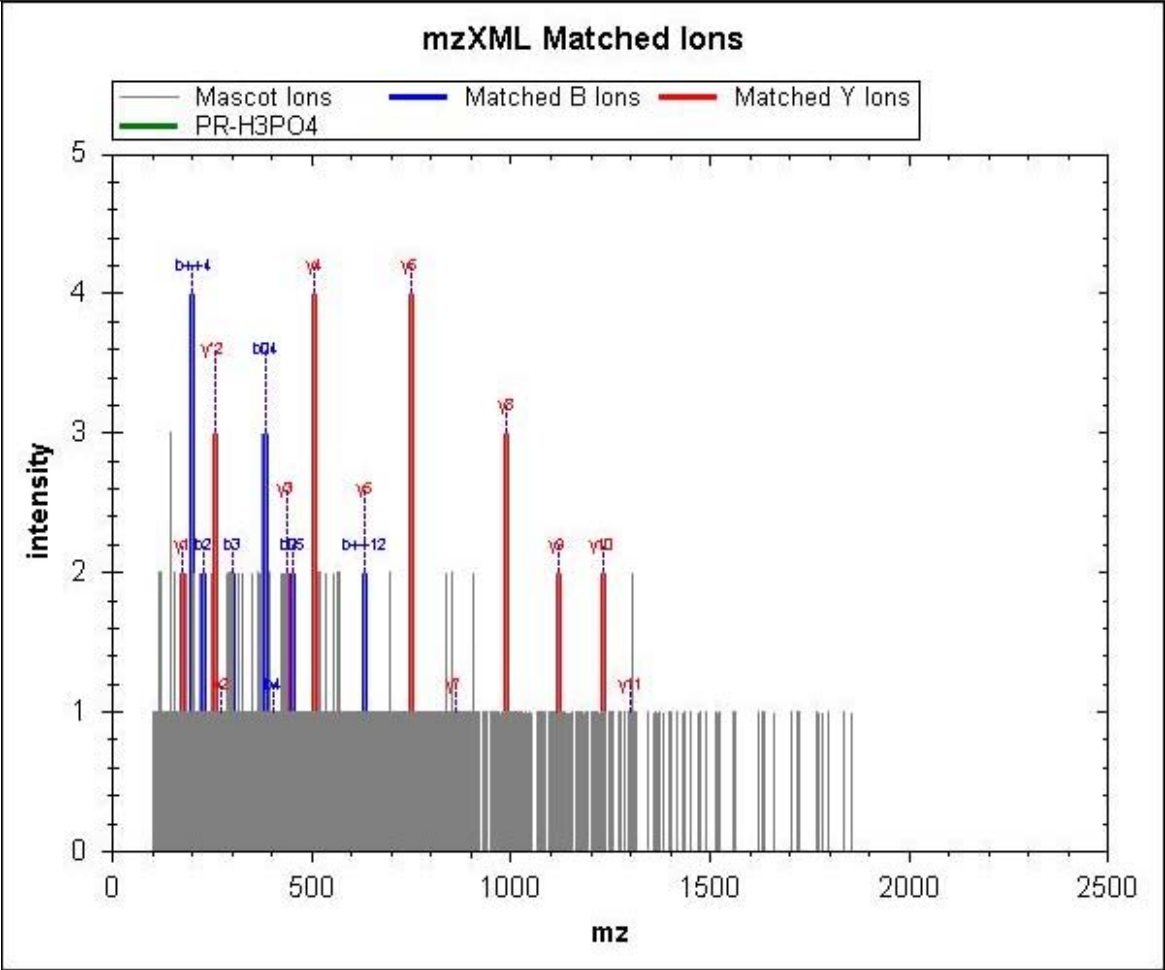

Protein index=1072, ACC No: IPI00221002

Peptide index=6029 MS/MS spectrum

Sequence: ALAQYLLFLR, m/z:604.3665, charge:+ 2, Modification: , Mod Position:

Score: 53.72, Raw data:WET\_B5\_090616\_02.mzxml, MS/MS Elution time: 81.43999, Scan number:4537, Mass delta:0.0047, Rank:1

| No | b     | b++   | b* | b*++ | Seq | y | y++ | y* | y*++ | RevNo |
|----|-------|-------|----|------|-----|---|-----|----|------|-------|
| 1  | 72.04 | 36.53 |    |      | A   |   |     |    |      | 10    |

|    |         |        |         |        |   |         |        |         |        |   |
|----|---------|--------|---------|--------|---|---------|--------|---------|--------|---|
| 2  | 185.13  | 93.07  |         |        | L | 1136.68 | 568.84 | 1119.66 | 560.33 | 9 |
| 3  | 256.17  | 128.59 |         |        | A | 1023.6  | 512.3  | 1006.57 | 503.79 | 8 |
| 4  | 384.22  | 192.62 | 367.2   | 184.1  | Q | 952.56  | 476.78 | 935.53  | 468.27 | 7 |
| 5  | 547.29  | 274.15 | 530.26  | 265.63 | Y | 824.5   | 412.76 | 807.48  | 404.24 | 6 |
| 6  | 660.37  | 330.69 | 643.34  | 322.18 | L | 661.44  | 331.22 | 644.41  | 322.71 | 5 |
| 7  | 773.46  | 387.23 | 756.43  | 378.72 | L | 548.36  | 274.68 | 531.33  | 266.17 | 4 |
| 8  | 920.52  | 460.77 | 903.5   | 452.25 | F | 435.27  | 218.14 | 418.24  | 209.63 | 3 |
| 9  | 1033.61 | 517.31 | 1016.58 | 508.79 | L | 288.2   | 144.61 | 271.18  | 136.09 | 2 |
| 10 |         |        |         |        | R | 175.12  | 88.06  | 158.09  | 79.55  | 1 |

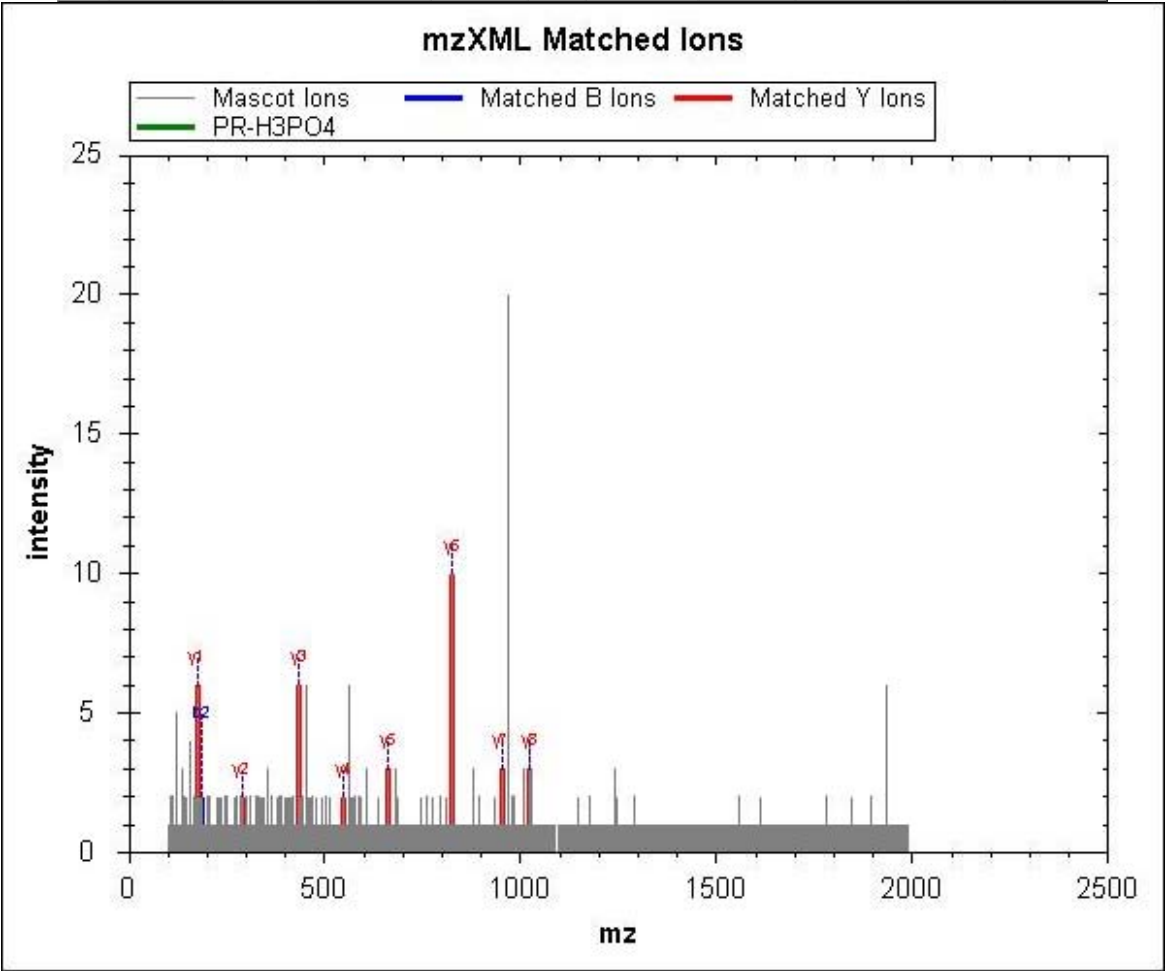

Protein index=1082, ACC No:IPI00015955

Peptide index=4594 MS/MS spectrum

Sequence: AVLTFALDSVER, m/z:660.8603, charge:+ 2, Modification: , Mod Position:

Score: 78.43, Raw data:WET\_B5\_090616\_01.mzxml, MS/MS Elution time: 63.837, Scan number:3481, Mass delta:-0.0002, Rank:1

| No | b      | b++   | b0 | b0++ | Seq | y       | y++    | y*      | y*++   | y0      | y0++   | RevNo |
|----|--------|-------|----|------|-----|---------|--------|---------|--------|---------|--------|-------|
| 1  | 72.04  | 36.53 |    |      | A   |         |        |         |        |         |        | 12    |
| 2  | 171.11 | 86.06 |    |      | V   | 1249.68 | 625.34 | 1232.65 | 616.83 | 1231.67 | 616.34 | 11    |
| 3  | 284.2  | 142.6 |    |      | L   | 1150.61 | 575.81 | 1133.58 | 567.3  | 1132.6  | 566.8  | 10    |

|    |         |        |         |        |   |         |        |        |        |         |        |   |
|----|---------|--------|---------|--------|---|---------|--------|--------|--------|---------|--------|---|
| 4  | 385.24  | 193.13 | 367.23  | 184.12 | T | 1037.53 | 519.27 | 1020.5 | 510.75 | 1019.52 | 510.26 | 9 |
| 5  | 532.31  | 266.66 | 514.3   | 257.65 | F | 936.48  | 468.74 | 919.45 | 460.23 | 918.47  | 459.74 | 8 |
| 6  | 603.35  | 302.18 | 585.34  | 293.17 | A | 789.41  | 395.21 | 772.38 | 386.7  | 771.4   | 386.2  | 7 |
| 7  | 716.43  | 358.72 | 698.42  | 349.72 | L | 718.37  | 359.69 | 701.35 | 351.18 | 700.36  | 350.68 | 6 |
| 8  | 831.46  | 416.23 | 813.45  | 407.23 | D | 605.29  | 303.15 | 588.26 | 294.63 | 587.28  | 294.14 | 5 |
| 9  | 918.49  | 459.75 | 900.48  | 450.74 | S | 490.26  | 245.63 | 473.24 | 237.12 | 472.25  | 236.63 | 4 |
| 10 | 1017.56 | 509.28 | 999.55  | 500.28 | V | 403.23  | 202.12 | 386.2  | 193.61 | 385.22  | 193.11 | 3 |
| 11 | 1146.6  | 573.81 | 1128.59 | 564.8  | E | 304.16  | 152.58 | 287.13 | 144.07 | 286.15  | 143.58 | 2 |
| 12 |         |        |         |        | R | 175.12  | 88.06  | 158.09 | 79.55  |         |        | 1 |

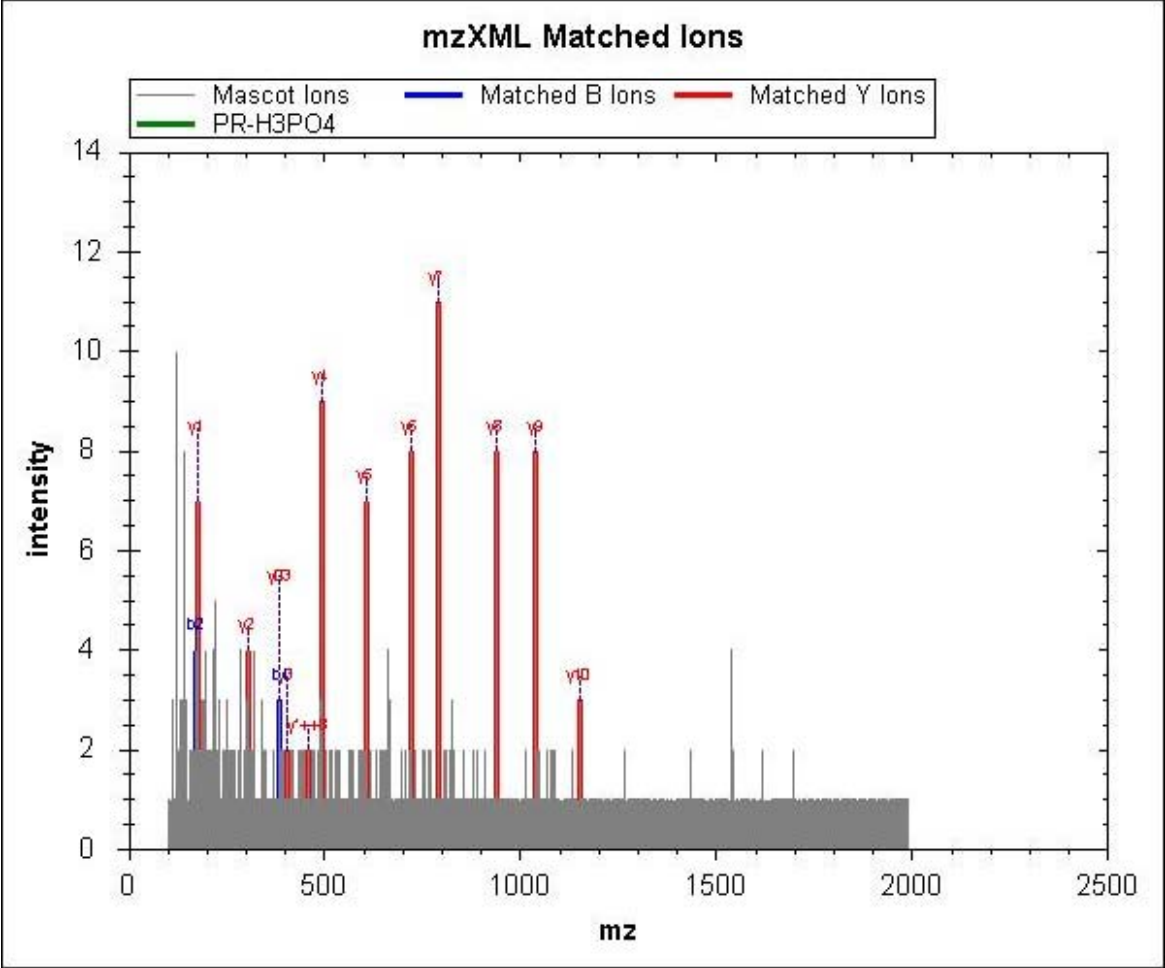

Protein index=1084, ACC No: IPI00017448

Peptide index=1600 MS/MS spectrum

Sequence: MGESDDSilR, m/z:561.7598, charge: + 2, Modification: , Mod Position:

Score: 69.26, Raw data: WET\_A5\_090615\_01.mzxml, MS/MS Elution time: 35.293, Scan number: 1830, Mass delta: 0.0027, Rank: 1

| No | b      | b++    | b0    | b0++   | Seq | y      | y++    | y*     | y*++   | y0     | y0++   | RevNo |
|----|--------|--------|-------|--------|-----|--------|--------|--------|--------|--------|--------|-------|
| 1  | 132.05 | 66.53  |       |        | M   |        |        |        |        |        |        | 10    |
| 2  | 189.07 | 95.04  |       |        | G   | 991.47 | 496.24 | 974.44 | 487.72 | 973.46 | 487.23 | 9     |
| 3  | 318.11 | 159.56 | 300.1 | 150.55 | E   | 934.45 | 467.73 | 917.42 | 459.21 | 916.44 | 458.72 | 8     |



|    |         |        |         |        |         |        |   |         |        |         |        |         |        |    |
|----|---------|--------|---------|--------|---------|--------|---|---------|--------|---------|--------|---------|--------|----|
| 5  | 636.27  | 318.64 |         |        | 618.26  | 309.63 | M | 1257.57 | 629.29 | 1240.54 | 620.78 | 1239.56 | 620.28 | 10 |
| 6  | 723.3   | 362.15 |         |        | 705.29  | 353.15 | S | 1126.53 | 563.77 | 1109.5  | 555.26 | 1108.52 | 554.76 | 9  |
| 7  | 870.34  | 435.67 |         |        | 852.33  | 426.67 | M | 1039.5  | 520.25 | 1022.47 | 511.74 | 1021.49 | 511.25 | 8  |
| 8  | 1026.44 | 513.72 | 1009.41 | 505.21 | 1008.43 | 504.72 | R | 892.46  | 446.74 | 875.44  | 438.22 | 874.45  | 437.73 | 7  |
| 9  | 1083.46 | 542.23 | 1066.43 | 533.72 | 1065.45 | 533.23 | G | 736.36  | 368.68 | 719.34  | 360.17 | 718.35  | 359.68 | 6  |
| 10 | 1198.49 | 599.75 | 1181.46 | 591.23 | 1180.48 | 590.74 | D | 679.34  | 340.17 | 662.31  | 331.66 | 661.33  | 331.17 | 5  |
| 11 | 1311.57 | 656.29 | 1294.54 | 647.78 | 1293.56 | 647.28 | I | 564.31  | 282.66 | 547.29  | 274.15 | 546.3   | 273.66 | 4  |
| 12 | 1458.64 | 729.82 | 1441.61 | 721.31 | 1440.63 | 720.82 | F | 451.23  | 226.12 | 434.2   | 217.61 | 433.22  | 217.11 | 3  |
| 13 | 1587.68 | 794.34 | 1570.66 | 785.83 | 1569.67 | 785.34 | E | 304.16  | 152.58 | 287.13  | 144.07 | 286.15  | 143.58 | 2  |
| 14 |         |        |         |        |         |        | R | 175.12  | 88.06  | 158.09  | 79.55  |         |        | 1  |

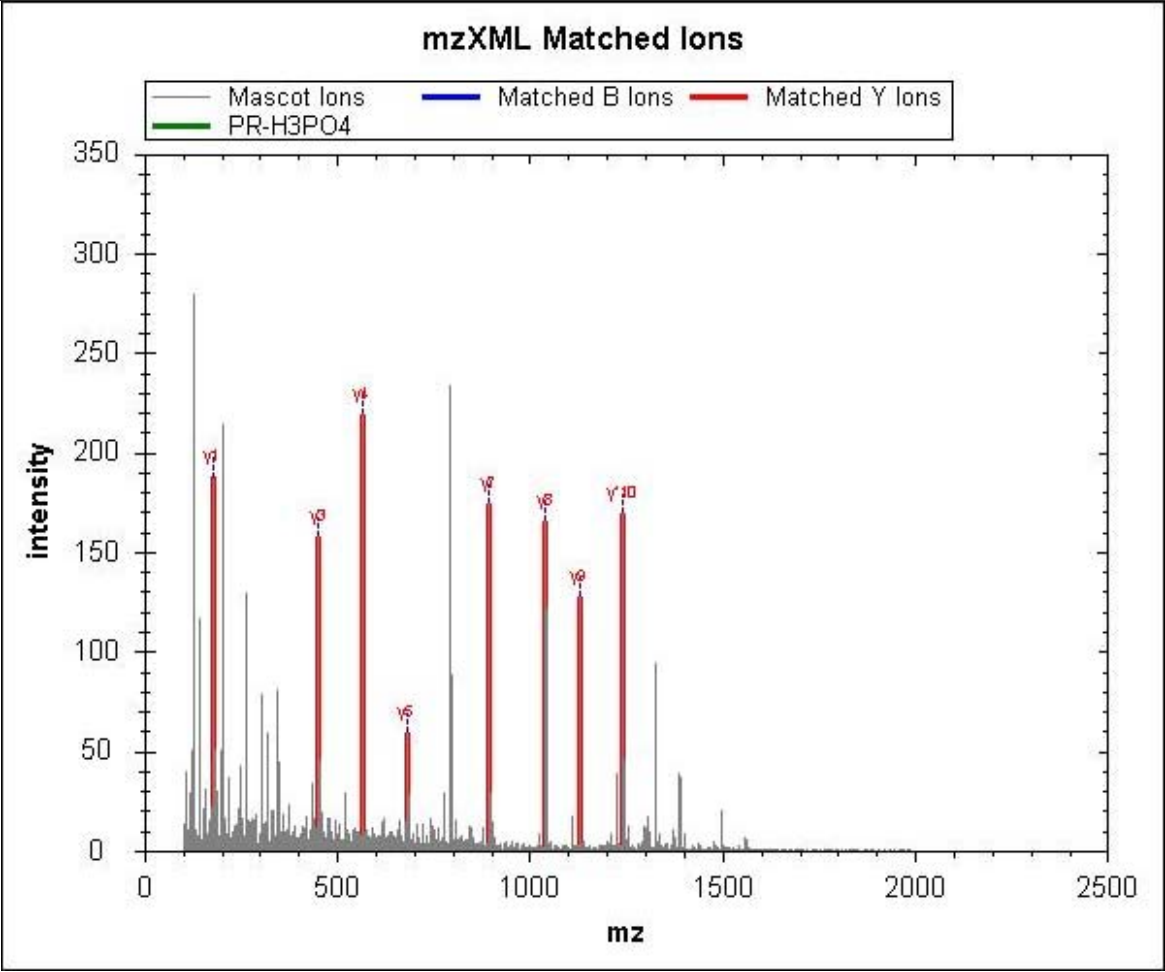

Protein index=1087, ACC No: IPI00000181

Peptide index=507 MS/MS spectrum

Sequence: GDKPVTYEEAHAPHYIAHR, m/z:548.5164, charge: + 4, Modification: , Mod Position:

Score: 56.5, Raw data: WET\_A5\_090615\_02.mzxml, MS/MS Elution time: 20.24833, Scan number: 937, Mass delta: -0.024, Rank: 1

| No | b      | b++   | b* | b*++ | b0     | b0++  | Seq | y       | y++     | y*      | y*++    | y0      | y0++    | RevNo |
|----|--------|-------|----|------|--------|-------|-----|---------|---------|---------|---------|---------|---------|-------|
| 1  | 58.03  | 29.52 |    |      |        |       | G   |         |         |         |         |         |         | 19    |
| 2  | 173.06 | 87.03 |    |      | 155.05 | 78.03 | D   | 2134.05 | 1067.53 | 2117.02 | 1059.01 | 2116.04 | 1058.52 | 18    |

|    |         |         |         |         |         |        |   |         |         |         |        |         |         |    |
|----|---------|---------|---------|---------|---------|--------|---|---------|---------|---------|--------|---------|---------|----|
| 3  | 301.15  | 151.08  | 284.12  | 142.57  | 283.14  | 142.07 | K | 2019.02 | 1010.01 | 2001.99 | 1001.5 | 2001.01 | 1001.01 | 17 |
| 4  | 398.2   | 199.61  | 381.18  | 191.09  | 380.19  | 190.6  | P | 1890.92 | 945.97  | 1873.9  | 937.45 | 1872.91 | 936.96  | 16 |
| 5  | 497.27  | 249.14  | 480.25  | 240.63  | 479.26  | 240.13 | V | 1793.87 | 897.44  | 1776.85 | 888.93 | 1775.86 | 888.43  | 15 |
| 6  | 598.32  | 299.66  | 581.29  | 291.15  | 580.31  | 290.66 | T | 1694.8  | 847.91  | 1677.78 | 839.39 | 1676.79 | 838.9   | 14 |
| 7  | 761.38  | 381.2   | 744.36  | 372.68  | 743.37  | 372.19 | Y | 1593.76 | 797.38  | 1576.73 | 788.87 | 1575.75 | 788.38  | 13 |
| 8  | 890.43  | 445.72  | 873.4   | 437.2   | 872.41  | 436.71 | E | 1430.69 | 715.85  | 1413.67 | 707.34 | 1412.68 | 706.84  | 12 |
| 9  | 1019.47 | 510.24  | 1002.44 | 501.72  | 1001.46 | 501.23 | E | 1301.65 | 651.33  | 1284.62 | 642.82 | 1283.64 | 642.32  | 11 |
| 10 | 1090.51 | 545.76  | 1073.48 | 537.24  | 1072.49 | 536.75 | A | 1172.61 | 586.81  | 1155.58 | 578.29 |         |         | 10 |
| 11 | 1227.56 | 614.29  | 1210.54 | 605.77  | 1209.55 | 605.28 | H | 1101.57 | 551.29  | 1084.54 | 542.78 |         |         | 9  |
| 12 | 1298.6  | 649.8   | 1281.57 | 641.29  | 1280.59 | 640.8  | A | 964.51  | 482.76  | 947.48  | 474.25 |         |         | 8  |
| 13 | 1395.65 | 698.33  | 1378.63 | 689.82  | 1377.64 | 689.33 | P | 893.47  | 447.24  | 876.45  | 438.73 |         |         | 7  |
| 14 | 1532.71 | 766.86  | 1515.69 | 758.35  | 1514.7  | 757.85 | H | 796.42  | 398.71  | 779.39  | 390.2  |         |         | 6  |
| 15 | 1695.78 | 848.39  | 1678.75 | 839.88  | 1677.77 | 839.39 | Y | 659.36  | 330.18  | 642.34  | 321.67 |         |         | 5  |
| 16 | 1808.86 | 904.93  | 1791.83 | 896.42  | 1790.85 | 895.93 | I | 496.3   | 248.65  | 479.27  | 240.14 |         |         | 4  |
| 17 | 1879.9  | 940.45  | 1862.87 | 931.94  | 1861.89 | 931.45 | A | 383.21  | 192.11  | 366.19  | 183.6  |         |         | 3  |
| 18 | 2016.96 | 1008.98 | 1999.93 | 1000.47 | 1998.95 | 999.98 | H | 312.18  | 156.59  | 295.15  | 148.08 |         |         | 2  |
| 19 |         |         |         |         |         |        | R | 175.12  | 88.06   | 158.09  | 79.55  |         |         | 1  |

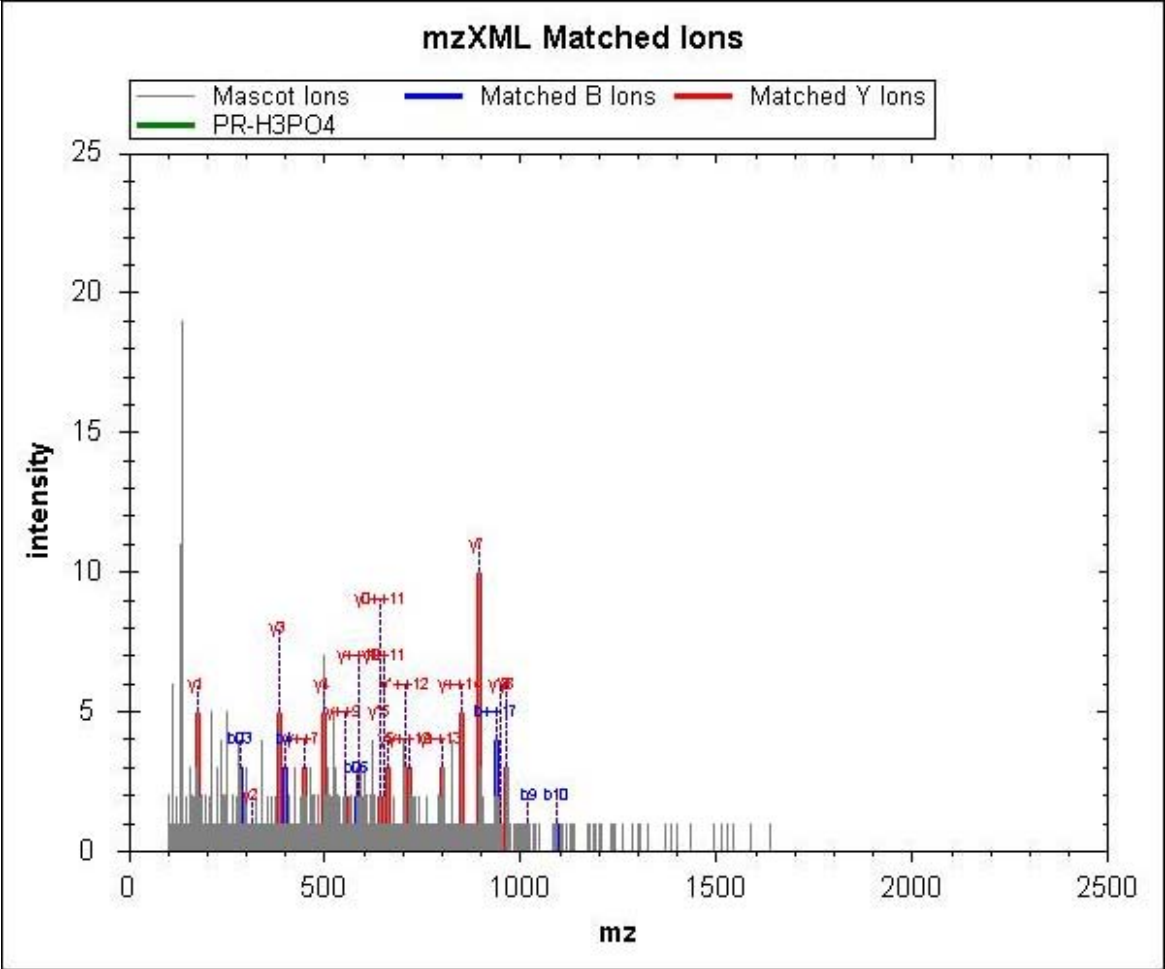

Protein index=1093, ACC No:IP100020883

Peptide index=7150 MS/MS spectrum

Sequence: IAAQGFTVAAILLGLAVTAMK, m/z:1038.1, charge:+ 2, Modification: Oxidation (M), Mod Position: 0.0000000000000000000010.0

Score: 51.98, Raw data:WET\_A5\_090615\_03.mzxml, MS/MS Elution time: 109.2842, Scan number:6194, Mass delta:0.0046, Rank:1

| No | b       | b++    | b*      | b*++   | b0      | b0++   | Seq | y       | y++    | y*      | y*++   | y0      | y0++   | RevNo |
|----|---------|--------|---------|--------|---------|--------|-----|---------|--------|---------|--------|---------|--------|-------|
| 1  | 114.09  | 57.55  |         |        |         |        | I   |         |        |         |        |         |        | 21    |
| 2  | 185.13  | 93.07  |         |        |         |        | A   | 1898.11 | 949.56 | 1881.08 | 941.05 | 1880.1  | 940.55 | 20    |
| 3  | 256.17  | 128.59 |         |        |         |        | A   | 1827.07 | 914.04 | 1810.05 | 905.53 | 1809.06 | 905.04 | 19    |
| 4  | 384.22  | 192.62 | 367.2   | 184.1  |         |        | Q   | 1756.04 | 878.52 | 1739.01 | 870.01 | 1738.03 | 869.52 | 18    |
| 5  | 441.25  | 221.13 | 424.22  | 212.61 |         |        | G   | 1627.98 | 814.49 | 1610.95 | 805.98 | 1609.97 | 805.49 | 17    |
| 6  | 588.31  | 294.66 | 571.29  | 286.15 |         |        | F   | 1570.96 | 785.98 | 1553.93 | 777.47 | 1552.95 | 776.98 | 16    |
| 7  | 689.36  | 345.18 | 672.34  | 336.67 | 671.35  | 336.18 | T   | 1423.89 | 712.45 | 1406.86 | 703.93 | 1405.88 | 703.44 | 15    |
| 8  | 788.43  | 394.72 | 771.4   | 386.21 | 770.42  | 385.71 | V   | 1322.84 | 661.92 | 1305.81 | 653.41 | 1304.83 | 652.92 | 14    |
| 9  | 859.47  | 430.24 | 842.44  | 421.72 | 841.46  | 421.23 | A   | 1223.77 | 612.39 | 1206.75 | 603.88 | 1205.76 | 603.38 | 13    |
| 10 | 930.5   | 465.76 | 913.48  | 457.24 | 912.49  | 456.75 | A   | 1152.73 | 576.87 | 1135.71 | 568.36 | 1134.72 | 567.87 | 12    |
| 11 | 1043.59 | 522.3  | 1026.56 | 513.78 | 1025.58 | 513.29 | I   | 1081.7  | 541.35 | 1064.67 | 532.84 | 1063.69 | 532.35 | 11    |
| 12 | 1156.67 | 578.84 | 1139.65 | 570.33 | 1138.66 | 569.83 | L   | 968.61  | 484.81 | 951.59  | 476.3  | 950.6   | 475.81 | 10    |
| 13 | 1269.76 | 635.38 | 1252.73 | 626.87 | 1251.75 | 626.38 | L   | 855.53  | 428.27 | 838.5   | 419.76 | 837.52  | 419.26 | 9     |
| 14 | 1326.78 | 663.89 | 1309.75 | 655.38 | 1308.77 | 654.89 | G   | 742.45  | 371.73 | 725.42  | 363.21 | 724.44  | 362.72 | 8     |
| 15 | 1439.86 | 720.43 | 1422.84 | 711.92 | 1421.85 | 711.43 | L   | 685.42  | 343.22 | 668.4   | 334.7  | 667.41  | 334.21 | 7     |
| 16 | 1510.9  | 755.95 | 1493.87 | 747.44 | 1492.89 | 746.95 | A   | 572.34  | 286.67 | 555.31  | 278.16 | 554.33  | 277.67 | 6     |
| 17 | 1609.97 | 805.49 | 1592.94 | 796.97 | 1591.96 | 796.48 | V   | 501.3   | 251.16 | 484.28  | 242.64 | 483.29  | 242.15 | 5     |
| 18 | 1711.02 | 856.01 | 1693.99 | 847.5  | 1693    | 847.01 | T   | 402.23  | 201.62 | 385.21  | 193.11 | 384.22  | 192.62 | 4     |
| 19 | 1782.05 | 891.53 | 1765.03 | 883.02 | 1764.04 | 882.52 | A   | 301.19  | 151.1  | 284.16  | 142.58 |         |        | 3     |
| 20 | 1865.09 | 933.05 | 1848.06 | 924.54 | 1847.08 | 924.04 | M   | 230.15  | 115.58 | 213.12  | 107.07 |         |        | 2     |
| 21 |         |        |         |        |         |        | K   | 147.11  | 74.06  | 130.09  | 65.55  |         |        | 1     |

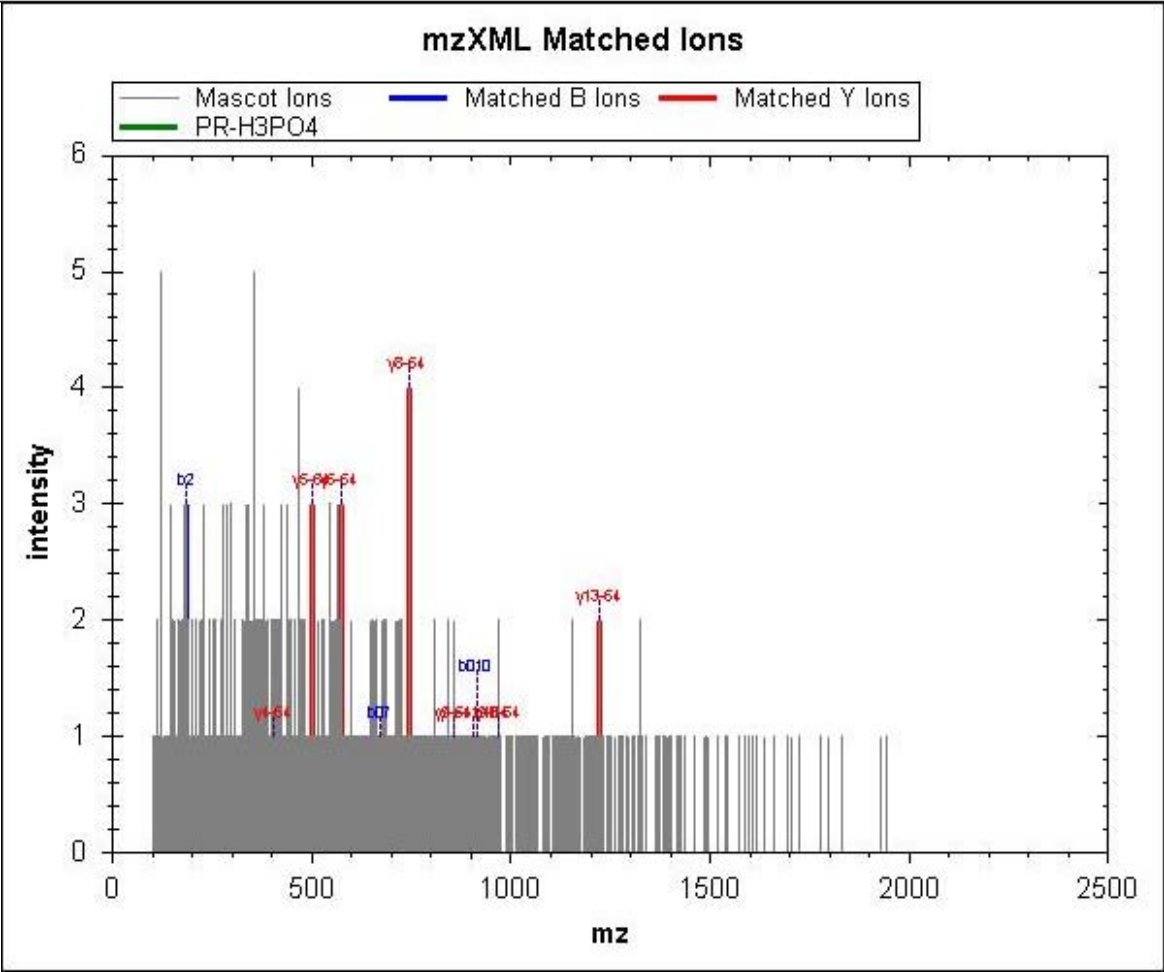

Protein index=1102, ACC No: IPI00007001

Peptide index=5012 MS/MS spectrum

Sequence: AQDEAFALQDVPLSSVVR, m/z:973.0043, charge:+ 2, Modification: , Mod Position:

Score: 94.88, Raw data:WET\_A5\_090615\_02.mzxml, MS/MS Elution time: 67.99734, Scan number:3738, Mass delta:0.0078, Rank:1

| No | b       | b++    | b*      | b*++   | b0      | b0++   | Seq | y       | y++    | y*      | y*++   | y0      | y0++   | RevNo |
|----|---------|--------|---------|--------|---------|--------|-----|---------|--------|---------|--------|---------|--------|-------|
| 1  | 72.04   | 36.53  |         |        |         |        | A   |         |        |         |        |         |        | 18    |
| 2  | 200.1   | 100.56 | 183.08  | 92.04  |         |        | Q   | 1873.97 | 937.49 | 1856.94 | 928.97 | 1855.95 | 928.48 | 17    |
| 3  | 315.13  | 158.07 | 298.1   | 149.56 | 297.12  | 149.06 | D   | 1745.91 | 873.46 | 1728.88 | 864.94 | 1727.9  | 864.45 | 16    |
| 4  | 444.17  | 222.59 | 427.15  | 214.08 | 426.16  | 213.58 | E   | 1630.88 | 815.94 | 1613.85 | 807.43 | 1612.87 | 806.94 | 15    |
| 5  | 515.21  | 258.11 | 498.18  | 249.6  | 497.2   | 249.1  | A   | 1501.84 | 751.42 | 1484.81 | 742.91 | 1483.83 | 742.42 | 14    |
| 6  | 662.28  | 331.64 | 645.25  | 323.13 | 644.27  | 322.64 | F   | 1430.8  | 715.9  | 1413.77 | 707.39 | 1412.79 | 706.9  | 13    |
| 7  | 733.32  | 367.16 | 716.29  | 358.65 | 715.3   | 358.16 | A   | 1283.73 | 642.37 | 1266.71 | 633.86 | 1265.72 | 633.36 | 12    |
| 8  | 846.4   | 423.7  | 829.37  | 415.19 | 828.39  | 414.7  | L   | 1212.69 | 606.85 | 1195.67 | 598.34 | 1194.68 | 597.85 | 11    |
| 9  | 974.46  | 487.73 | 957.43  | 479.22 | 956.45  | 478.73 | Q   | 1099.61 | 550.31 | 1082.58 | 541.8  | 1081.6  | 541.3  | 10    |
| 10 | 1089.48 | 545.25 | 1072.46 | 536.73 | 1071.47 | 536.24 | D   | 971.55  | 486.28 | 954.53  | 477.77 | 953.54  | 477.27 | 9     |
| 11 | 1188.55 | 594.78 | 1171.53 | 586.27 | 1170.54 | 585.77 | V   | 856.53  | 428.77 | 839.5   | 420.25 | 838.51  | 419.76 | 8     |
| 12 | 1285.61 | 643.31 | 1268.58 | 634.79 | 1267.6  | 634.3  | P   | 757.46  | 379.23 | 740.43  | 370.72 | 739.45  | 370.23 | 7     |

|    |         |        |         |        |         |        |   |        |        |        |        |        |        |   |
|----|---------|--------|---------|--------|---------|--------|---|--------|--------|--------|--------|--------|--------|---|
| 13 | 1398.69 | 699.85 | 1381.66 | 691.34 | 1380.68 | 690.84 | L | 660.4  | 330.71 | 643.38 | 322.19 | 642.39 | 321.7  | 6 |
| 14 | 1485.72 | 743.36 | 1468.7  | 734.85 | 1467.71 | 734.36 | S | 547.32 | 274.16 | 530.29 | 265.65 | 529.31 | 265.16 | 5 |
| 15 | 1572.75 | 786.88 | 1555.73 | 778.37 | 1554.74 | 777.88 | S | 460.29 | 230.65 | 443.26 | 222.13 | 442.28 | 221.64 | 4 |
| 16 | 1671.82 | 836.41 | 1654.8  | 827.9  | 1653.81 | 827.41 | V | 373.26 | 187.13 | 356.23 | 178.62 |        |        | 3 |
| 17 | 1770.89 | 885.95 | 1753.86 | 877.44 | 1752.88 | 876.94 | V | 274.19 | 137.6  | 257.16 | 129.08 |        |        | 2 |
| 18 |         |        |         |        |         |        | R | 175.12 | 88.06  | 158.09 | 79.55  |        |        | 1 |

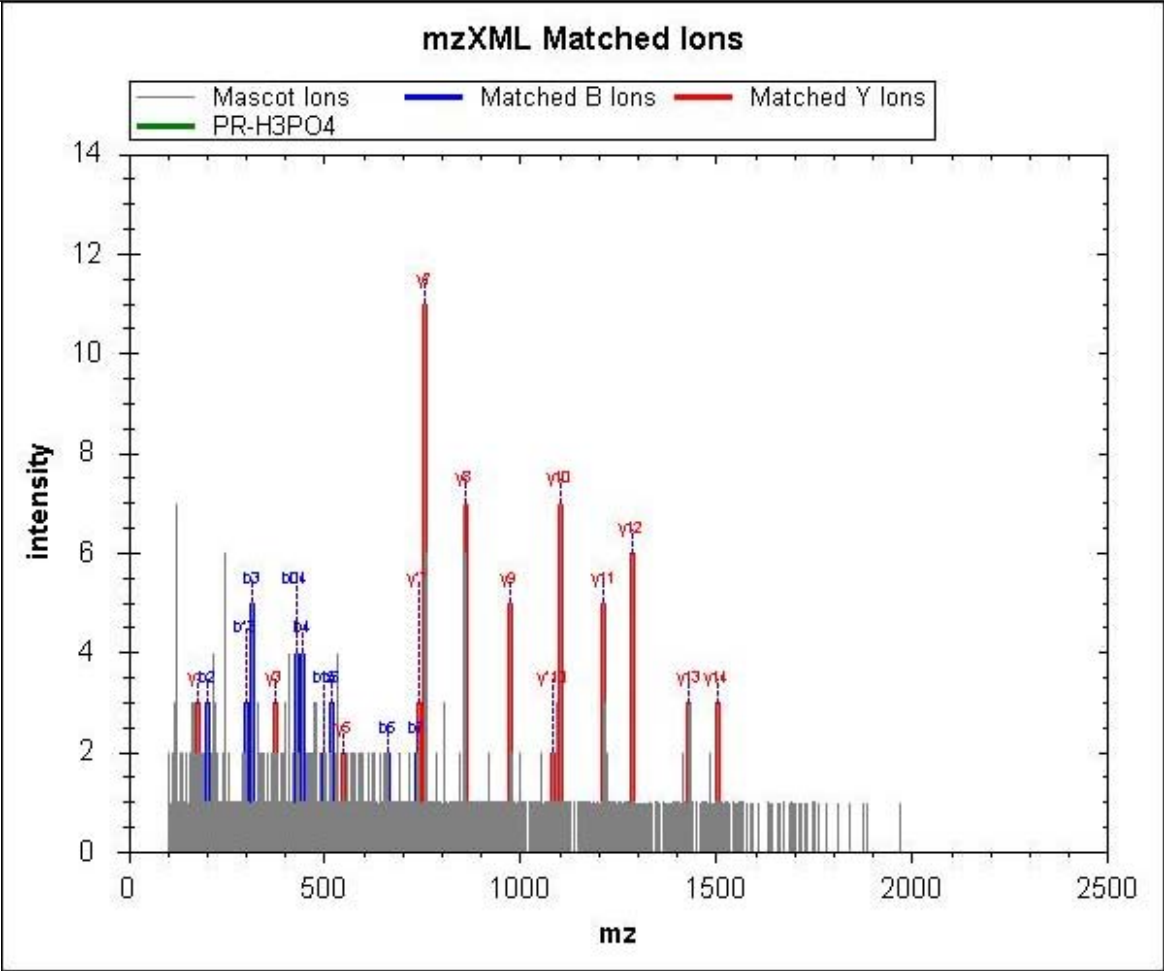

Protein index=1104, ACC No: IPI00012750

Peptide index=3358 MS/MS spectrum

Sequence: AALQELLSK, m/z:486.7828, charge:+ 2, Modification: , Mod Position:

Score: 68.07, Raw data:WET\_A5\_090615\_03.mzxml, MS/MS Elution time: 51.83434, Scan number:2794, Mass delta:-0.0169, Rank:1

| No | b      | b++    | b*     | b*++   | b0     | b0++   | Seq | y      | y++    | y*     | y*++   | y0     | y0++   | RevNo |
|----|--------|--------|--------|--------|--------|--------|-----|--------|--------|--------|--------|--------|--------|-------|
| 1  | 72.04  | 36.53  |        |        |        |        | A   |        |        |        |        |        |        | 9     |
| 2  | 143.08 | 72.04  |        |        |        |        | A   | 901.54 | 451.27 | 884.51 | 442.76 | 883.52 | 442.27 | 8     |
| 3  | 256.17 | 128.59 |        |        |        |        | L   | 830.5  | 415.75 | 813.47 | 407.24 | 812.49 | 406.75 | 7     |
| 4  | 384.22 | 192.62 | 367.2  | 184.1  |        |        | Q   | 717.41 | 359.21 | 700.39 | 350.7  | 699.4  | 350.21 | 6     |
| 5  | 513.27 | 257.14 | 496.24 | 248.62 | 495.26 | 248.13 | E   | 589.36 | 295.18 | 572.33 | 286.67 | 571.34 | 286.18 | 5     |
| 6  | 626.35 | 313.68 | 609.32 | 305.17 | 608.34 | 304.67 | L   | 460.31 | 230.66 | 443.29 | 222.15 | 442.3  | 221.65 | 4     |

|   |        |        |        |        |        |        |   |        |        |        |        |        |        |   |
|---|--------|--------|--------|--------|--------|--------|---|--------|--------|--------|--------|--------|--------|---|
| 7 | 739.43 | 370.22 | 722.41 | 361.71 | 721.42 | 361.22 | L | 347.23 | 174.12 | 330.2  | 165.6  | 329.22 | 165.11 | 3 |
| 8 | 826.47 | 413.74 | 809.44 | 405.22 | 808.46 | 404.73 | S | 234.14 | 117.58 | 217.12 | 109.06 | 216.13 | 108.57 | 2 |
| 9 |        |        |        |        |        |        | K | 147.11 | 74.06  | 130.09 | 65.55  |        |        | 1 |

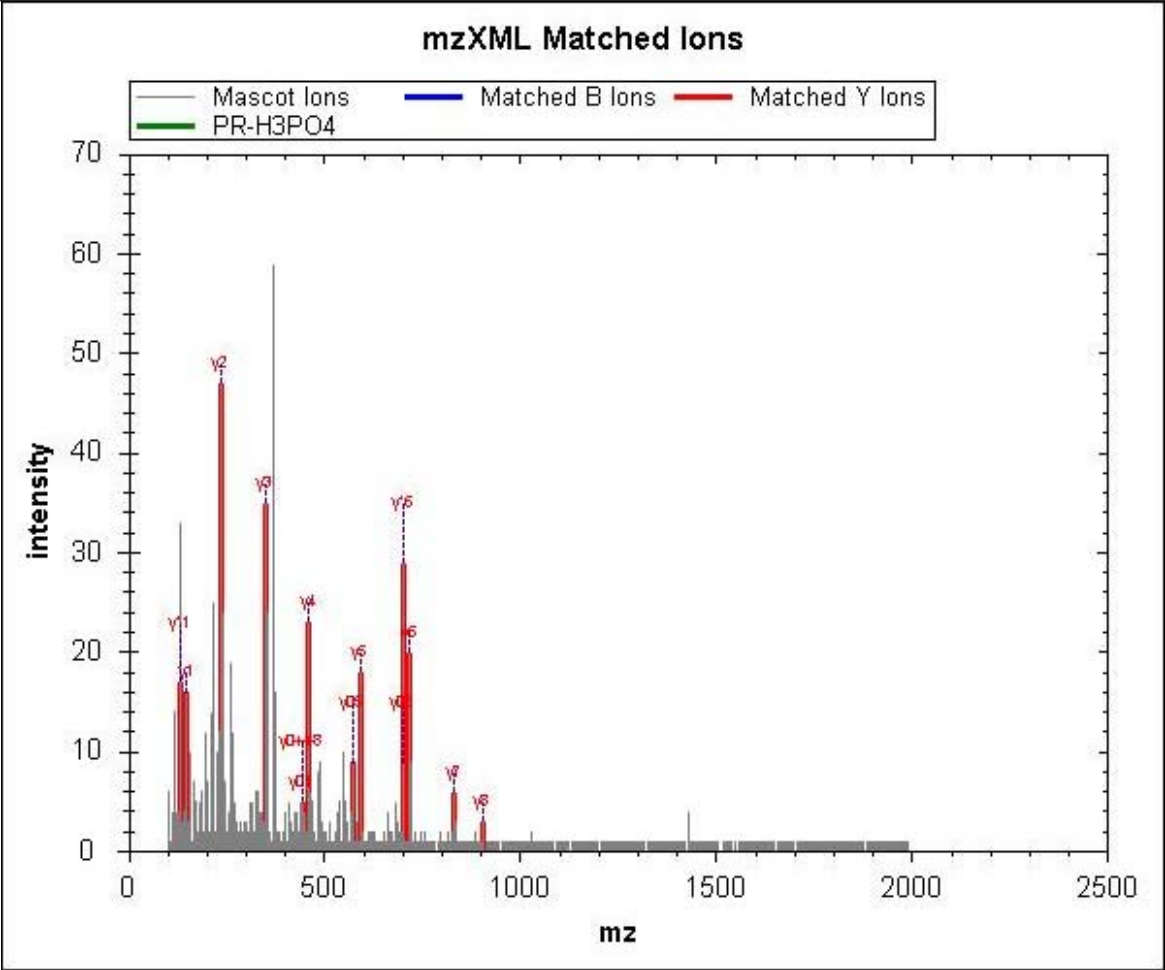

Protein index=1105, ACC No:IP100383314

Peptide index=5900 MS/MS spectrum

Sequence: TVRALKIALR, m/z:570.8844, charge:+ 2, Modification: , Mod Position:

Score: 37.66, Raw data:WET\_A5\_090615\_01.mzxml, MS/MS Elution time: 79.53967, Scan number:4421, Mass delta:0.004, Rank:1

| No | b      | b++    | b*     | b*++   | b0     | b0++   | Seq | y       | y++    | y*      | y*++   | RevNo |
|----|--------|--------|--------|--------|--------|--------|-----|---------|--------|---------|--------|-------|
| 1  | 102.05 | 51.53  |        |        | 84.04  | 42.53  | T   |         |        |         |        | 10    |
| 2  | 201.12 | 101.07 |        |        | 183.11 | 92.06  | V   | 1039.71 | 520.36 | 1022.68 | 511.85 | 9     |
| 3  | 357.22 | 179.12 | 340.2  | 170.6  | 339.21 | 170.11 | R   | 940.64  | 470.82 | 923.61  | 462.31 | 8     |
| 4  | 428.26 | 214.63 | 411.24 | 206.12 | 410.25 | 205.63 | A   | 784.54  | 392.77 | 767.51  | 384.26 | 7     |
| 5  | 541.35 | 271.18 | 524.32 | 262.66 | 523.34 | 262.17 | L   | 713.5   | 357.26 | 696.48  | 348.74 | 6     |
| 6  | 669.44 | 335.22 | 652.41 | 326.71 | 651.43 | 326.22 | K   | 600.42  | 300.71 | 583.39  | 292.2  | 5     |
| 7  | 782.52 | 391.77 | 765.5  | 383.25 | 764.51 | 382.76 | I   | 472.32  | 236.67 | 455.3   | 228.15 | 4     |
| 8  | 853.56 | 427.28 | 836.54 | 418.77 | 835.55 | 418.28 | A   | 359.24  | 180.12 | 342.21  | 171.61 | 3     |
| 9  | 966.65 | 483.83 | 949.62 | 475.31 | 948.64 | 474.82 | L   | 288.2   | 144.61 | 271.18  | 136.09 | 2     |

Peptide index=7107 MS/MS spectrum

Score: 95.58, Raw data:WET\_B5\_090616\_01.mzxml, MS/MS Elution time: 107.1837, Scan number:6016, Mass delta:0.0152, Rank:1

[illegible]

|    |         |         |         |         |         |         |   |         |        |         |        |         |        |    |
|----|---------|---------|---------|---------|---------|---------|---|---------|--------|---------|--------|---------|--------|----|
| 11 | 1065.48 | 533.25  | 1048.46 | 524.73  | 1047.47 | 524.24  | G | 1734.99 | 868    | 1717.96 | 859.49 | 1716.98 | 858.99 | 16 |
| 12 | 1178.57 | 589.79  | 1161.54 | 581.27  | 1160.56 | 580.78  | L | 1677.97 | 839.49 | 1660.94 | 830.97 | 1659.96 | 830.48 | 15 |
| 13 | 1291.65 | 646.33  | 1274.63 | 637.82  | 1273.64 | 637.32  | I | 1564.88 | 782.95 | 1547.86 | 774.43 | 1546.87 | 773.94 | 14 |
| 14 | 1404.74 | 702.87  | 1387.71 | 694.36  | 1386.73 | 693.87  | L | 1451.8  | 726.4  | 1434.77 | 717.89 | 1433.79 | 717.4  | 13 |
| 15 | 1532.8  | 766.9   | 1515.77 | 758.39  | 1514.79 | 757.9   | Q | 1338.72 | 669.86 | 1321.69 | 661.35 | 1320.71 | 660.86 | 12 |
| 16 | 1645.88 | 823.44  | 1628.85 | 814.93  | 1627.87 | 814.44  | L | 1210.66 | 605.83 | 1193.63 | 597.32 | 1192.65 | 596.83 | 11 |
| 17 | 1744.95 | 872.98  | 1727.92 | 864.46  | 1726.94 | 863.97  | V | 1097.57 | 549.29 | 1080.55 | 540.78 | 1079.56 | 540.29 | 10 |
| 18 | 1801.97 | 901.49  | 1784.94 | 892.98  | 1783.96 | 892.48  | G | 998.51  | 499.76 | 981.48  | 491.24 | 980.49  | 490.75 | 9  |
| 19 | 1917    | 959     | 1899.97 | 950.49  | 1898.99 | 950     | D | 941.48  | 471.25 | 924.46  | 462.73 | 923.47  | 462.24 | 8  |
| 20 | 1988.03 | 994.52  | 1971.01 | 986.01  | 1970.02 | 985.52  | A | 826.46  | 413.73 | 809.43  | 405.22 |         |        | 7  |
| 21 | 2087.1  | 1044.05 | 2070.08 | 1035.54 | 2069.09 | 1035.05 | V | 755.42  | 378.21 | 738.39  | 369.7  |         |        | 6  |
| 22 | 2224.16 | 1112.58 | 2207.13 | 1104.07 | 2206.15 | 1103.58 | H | 656.35  | 328.68 | 639.32  | 320.17 |         |        | 5  |
| 23 | 2321.21 | 1161.11 | 2304.19 | 1152.6  | 2303.2  | 1152.11 | P | 519.29  | 260.15 | 502.27  | 251.64 |         |        | 4  |
| 24 | 2449.27 | 1225.14 | 2432.25 | 1216.63 | 2431.26 | 1216.13 | Q | 422.24  | 211.62 | 405.21  | 203.11 |         |        | 3  |
| 25 | 2596.34 | 1298.67 | 2579.31 | 1290.16 | 2578.33 | 1289.67 | F | 294.18  | 147.59 | 277.15  | 139.08 |         |        | 2  |
| 26 |         |         |         |         |         |         | K | 147.11  | 74.06  | 130.09  | 65.55  |         |        | 1  |

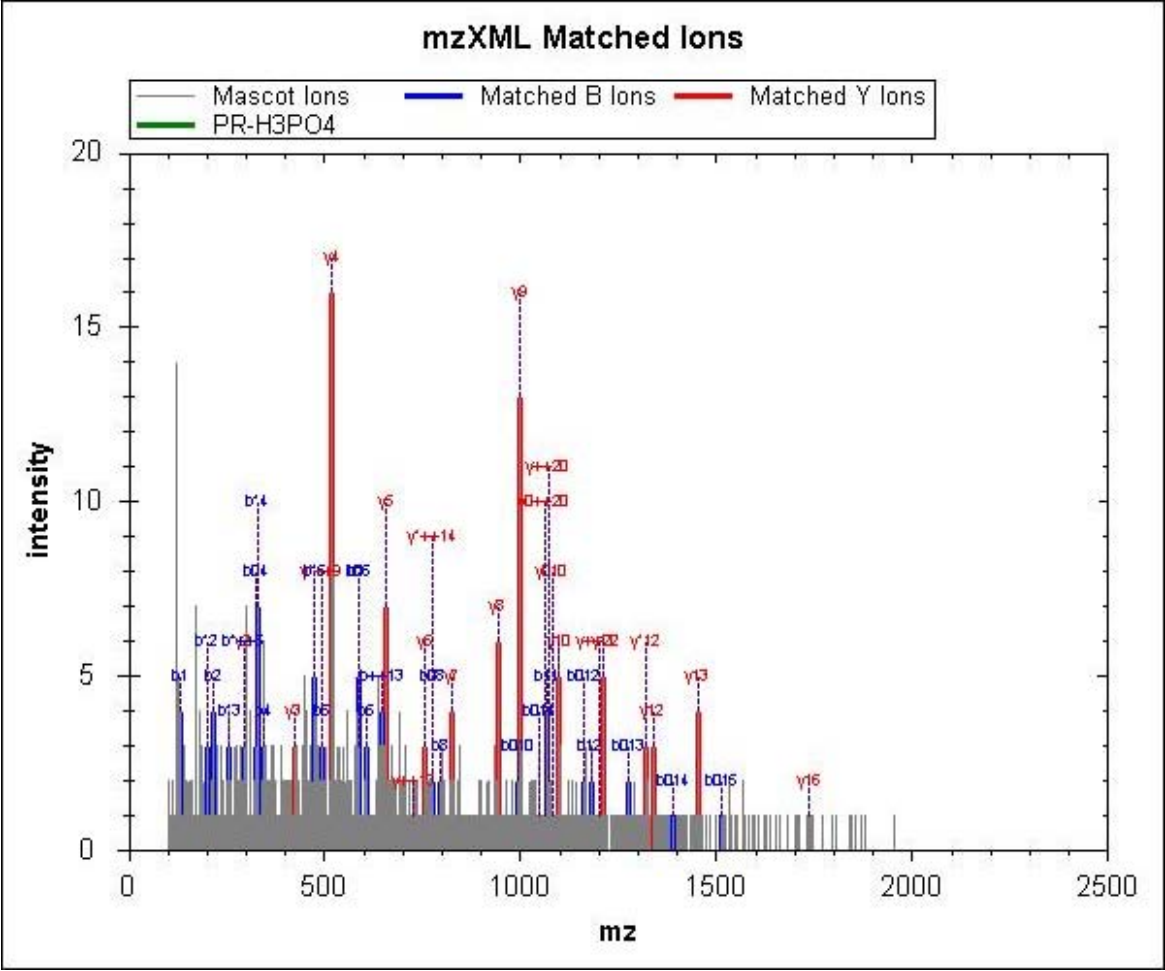

Protein index=1113, ACC No: IPI00017373

Peptide index=5439 MS/MS spectrum

Sequence: IIHDFPQFYPLGIVQHD, m/z:680.3492, charge:+ 3, Modification: , Mod Position:

Score: 51.16, Raw data:WET\_A5\_090615\_01.mzxml, MS/MS Elution time: 73.37566, Scan number:4060, Mass delta:-0.0054, Rank:1

| No | b       | b++    | b*      | b*++   | b0      | b0++   | Seq | y       | y++    | y*      | y*++   | y0      | y0++   | RevNo |
|----|---------|--------|---------|--------|---------|--------|-----|---------|--------|---------|--------|---------|--------|-------|
| 1  | 114.09  | 57.55  |         |        |         |        | I   |         |        |         |        |         |        | 17    |
| 2  | 227.18  | 114.09 |         |        |         |        | I   | 1925.95 | 963.48 | 1908.93 | 954.97 | 1907.94 | 954.48 | 16    |
| 3  | 364.23  | 182.62 |         |        |         |        | H   | 1812.87 | 906.94 | 1795.84 | 898.43 | 1794.86 | 897.93 | 15    |
| 4  | 479.26  | 240.13 |         |        | 461.25  | 231.13 | D   | 1675.81 | 838.41 | 1658.78 | 829.9  | 1657.8  | 829.4  | 14    |
| 5  | 626.33  | 313.67 |         |        | 608.32  | 304.66 | F   | 1560.78 | 780.9  | 1543.76 | 772.38 | 1542.77 | 771.89 | 13    |
| 6  | 723.38  | 362.19 |         |        | 705.37  | 353.19 | P   | 1413.72 | 707.36 | 1396.69 | 698.85 | 1395.71 | 698.36 | 12    |
| 7  | 851.44  | 426.22 | 834.41  | 417.71 | 833.43  | 417.22 | Q   | 1316.66 | 658.84 | 1299.64 | 650.32 | 1298.65 | 649.83 | 11    |
| 8  | 998.51  | 499.76 | 981.48  | 491.25 | 980.5   | 490.75 | F   | 1188.6  | 594.81 | 1171.58 | 586.29 | 1170.59 | 585.8  | 10    |
| 9  | 1161.57 | 581.29 | 1144.55 | 572.78 | 1143.56 | 572.28 | Y   | 1041.54 | 521.27 | 1024.51 | 512.76 | 1023.53 | 512.27 | 9     |
| 10 | 1258.63 | 629.82 | 1241.6  | 621.3  | 1240.61 | 620.81 | P   | 878.47  | 439.74 | 861.45  | 431.23 | 860.46  | 430.73 | 8     |
| 11 | 1371.71 | 686.36 | 1354.68 | 677.85 | 1353.7  | 677.35 | L   | 781.42  | 391.21 | 764.39  | 382.7  | 763.41  | 382.21 | 7     |
| 12 | 1428.73 | 714.87 | 1411.7  | 706.36 | 1410.72 | 705.86 | G   | 668.34  | 334.67 | 651.31  | 326.16 | 650.33  | 325.67 | 6     |
| 13 | 1541.82 | 771.41 | 1524.79 | 762.9  | 1523.8  | 762.41 | I   | 611.31  | 306.16 | 594.29  | 297.65 | 593.3   | 297.16 | 5     |
| 14 | 1640.88 | 820.95 | 1623.86 | 812.43 | 1622.87 | 811.94 | V   | 498.23  | 249.62 | 481.2   | 241.11 | 480.22  | 240.61 | 4     |
| 15 | 1768.94 | 884.97 | 1751.92 | 876.46 | 1750.93 | 875.97 | Q   | 399.16  | 200.08 | 382.14  | 191.57 | 381.15  | 191.08 | 3     |
| 16 | 1906    | 953.5  | 1888.97 | 944.99 | 1887.99 | 944.5  | H   | 271.1   | 136.06 |         |        | 253.09  | 127.05 | 2     |
| 17 |         |        |         |        |         |        | D   | 134.04  | 67.53  |         |        | 116.03  | 58.52  | 1     |

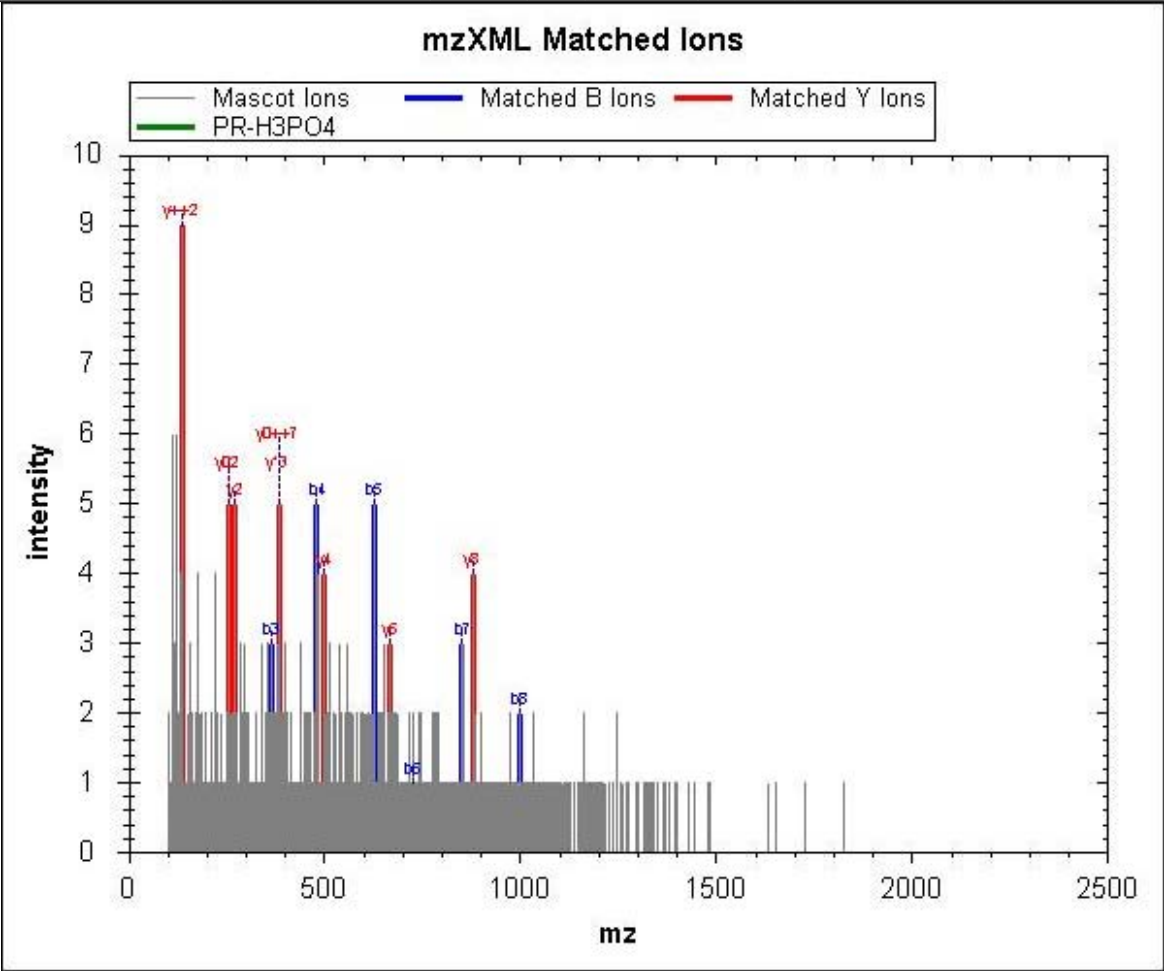

Protein index=1116, ACC No: IPI00166684

Peptide index=3569 MS/MS spectrum

Sequence: GLIENPALLR, m/z:548.3293, charge:+ 2, Modification: , Mod Position:

Score: 94.05, Raw data:WET\_A5\_090615\_01.mzxml, MS/MS Elution time: 53.68217, Scan number:2907, Mass delta:-0.0007, Rank:1

| No | b      | b++    | b*     | b*++   | b0     | b0++   | Seq | y       | y++    | y*     | y*++   | y0      | y0++   | RevNo |
|----|--------|--------|--------|--------|--------|--------|-----|---------|--------|--------|--------|---------|--------|-------|
| 1  | 58.03  | 29.52  |        |        |        |        | G   |         |        |        |        |         |        | 10    |
| 2  | 171.11 | 86.06  |        |        |        |        | L   | 1038.63 | 519.82 | 1021.6 | 511.31 | 1020.62 | 510.81 | 9     |
| 3  | 284.2  | 142.6  |        |        |        |        | I   | 925.55  | 463.28 | 908.52 | 454.76 | 907.54  | 454.27 | 8     |
| 4  | 413.24 | 207.12 |        |        | 395.23 | 198.12 | E   | 812.46  | 406.73 | 795.44 | 398.22 | 794.45  | 397.73 | 7     |
| 5  | 527.28 | 264.14 | 510.26 | 255.63 | 509.27 | 255.14 | N   | 683.42  | 342.21 | 666.39 | 333.7  |         |        | 6     |
| 6  | 624.34 | 312.67 | 607.31 | 304.16 | 606.32 | 303.67 | P   | 569.38  | 285.19 | 552.35 | 276.68 |         |        | 5     |
| 7  | 695.37 | 348.19 | 678.35 | 339.68 | 677.36 | 339.18 | A   | 472.32  | 236.67 | 455.3  | 228.15 |         |        | 4     |
| 8  | 808.46 | 404.73 | 791.43 | 396.22 | 790.45 | 395.73 | L   | 401.29  | 201.15 | 384.26 | 192.63 |         |        | 3     |
| 9  | 921.54 | 461.27 | 904.51 | 452.76 | 903.53 | 452.27 | L   | 288.2   | 144.61 | 271.18 | 136.09 |         |        | 2     |
| 10 |        |        |        |        |        |        | R   | 175.12  | 88.06  | 158.09 | 79.55  |         |        | 1     |

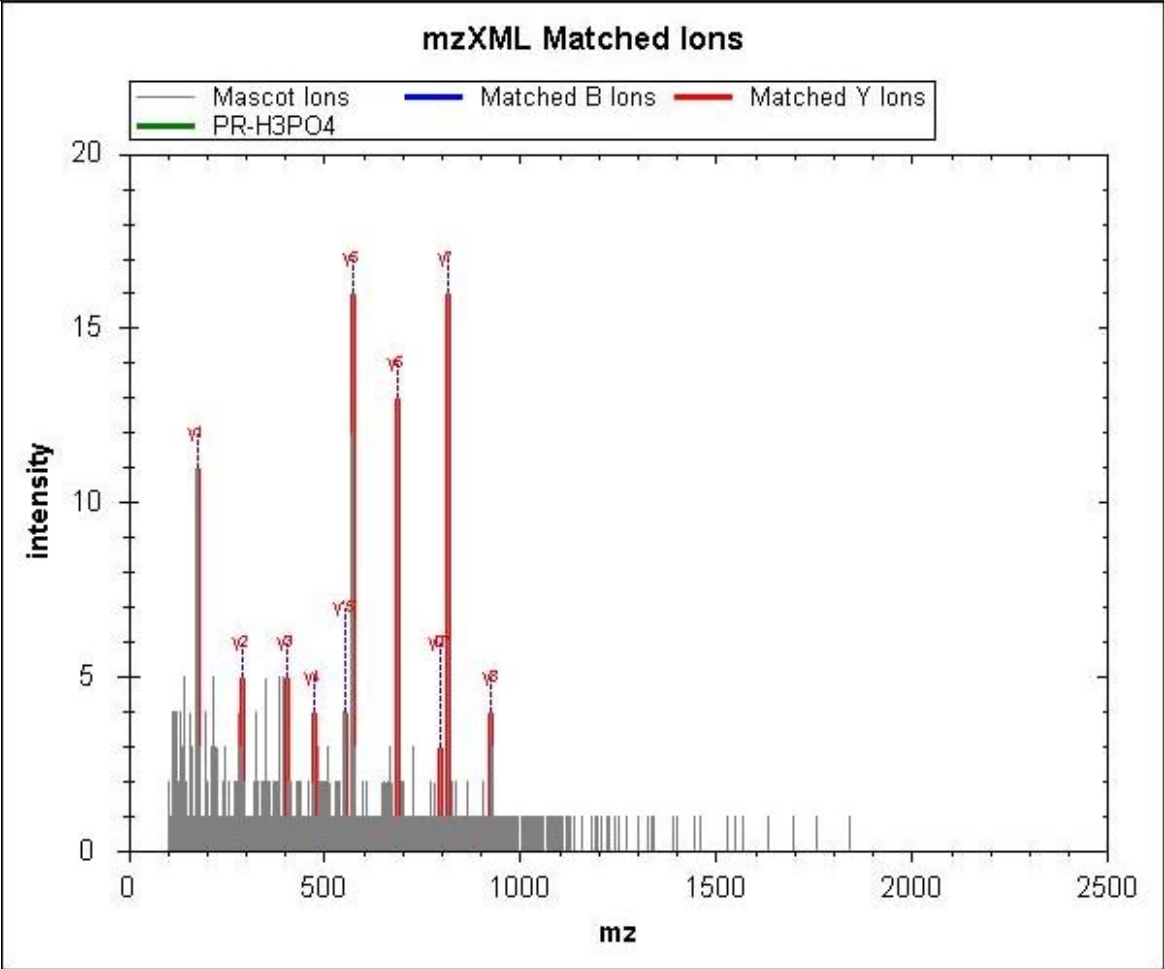

Protein index=1119, ACC No: IPI00171611

Peptide index=747 MS/MS spectrum

Sequence: EIAQDFK, m/z:425.7167, charge:+ 2, Modification: , Mod Position:

Score: 35.77, Raw data:WET\_B1\_090616\_02.mzxml, MS/MS Elution time: 24.179, Scan number:1175, Mass delta:-0.0045, Rank:1

| No | b      | b++    | b*     | b*++   | b0     | b0++   | Seq | y      | y++    | y*     | y*++   | y0     | y0++   | RevNo |
|----|--------|--------|--------|--------|--------|--------|-----|--------|--------|--------|--------|--------|--------|-------|
| 1  | 130.05 | 65.53  |        |        | 112.04 | 56.52  | E   |        |        |        |        |        |        | 7     |
| 2  | 243.13 | 122.07 |        |        | 225.12 | 113.07 | I   | 721.39 | 361.2  | 704.36 | 352.68 | 703.38 | 352.19 | 6     |
| 3  | 314.17 | 157.59 |        |        | 296.16 | 148.58 | A   | 608.3  | 304.66 | 591.28 | 296.14 | 590.29 | 295.65 | 5     |
| 4  | 442.23 | 221.62 | 425.2  | 213.11 | 424.22 | 212.61 | Q   | 537.27 | 269.14 | 520.24 | 260.62 | 519.26 | 260.13 | 4     |
| 5  | 557.26 | 279.13 | 540.23 | 270.62 | 539.25 | 270.13 | D   | 409.21 | 205.11 | 392.18 | 196.59 | 391.2  | 196.1  | 3     |
| 6  | 704.32 | 352.67 | 687.3  | 344.15 | 686.31 | 343.66 | F   | 294.18 | 147.59 | 277.15 | 139.08 |        |        | 2     |
| 7  |        |        |        |        |        |        | K   | 147.11 | 74.06  | 130.09 | 65.55  |        |        | 1     |

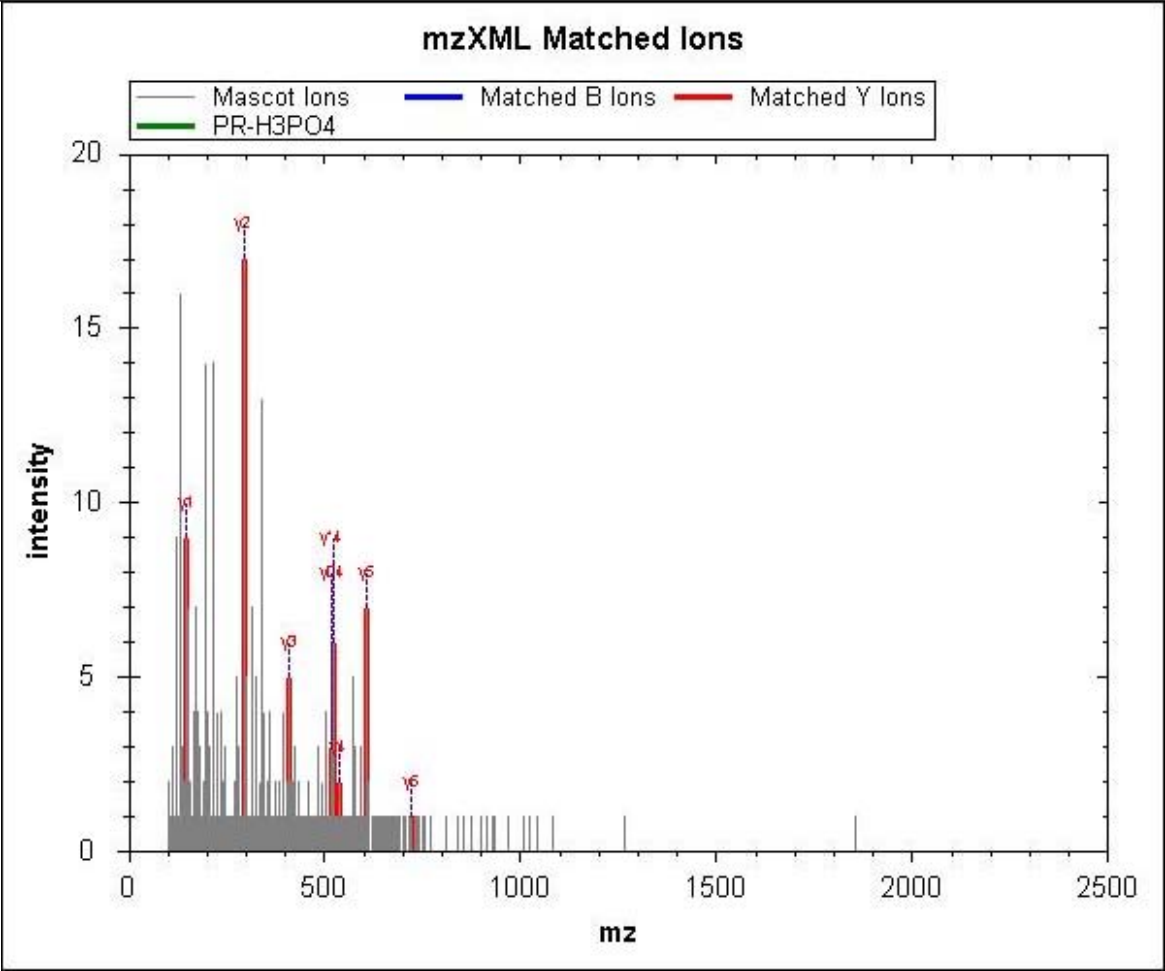

Protein index=1120, ACC No: IPI00016891

Peptide index=3365 MS/MS spectrum

Sequence: LVFLGEQSVGK, m/z:588.8342, charge:+ 2, Modification: , Mod Position:

Score: 65.4, Raw data:WET\_A5\_090615\_03.mzxml, MS/MS Elution time: 51.85467, Scan number:2795, Mass delta:-0.0008, Rank:1

| No | b       | b++    | b*      | b*++   | b0      | b0++   | Seq | y       | y++    | y*      | y*++   | y0      | y0++   | RevNo |
|----|---------|--------|---------|--------|---------|--------|-----|---------|--------|---------|--------|---------|--------|-------|
| 1  | 114.09  | 57.55  |         |        |         |        | L   |         |        |         |        |         |        | 11    |
| 2  | 213.16  | 107.08 |         |        |         |        | V   | 1063.58 | 532.29 | 1046.55 | 523.78 | 1045.57 | 523.29 | 10    |
| 3  | 360.23  | 180.62 |         |        |         |        | F   | 964.51  | 482.76 | 947.48  | 474.25 | 946.5   | 473.75 | 9     |
| 4  | 473.31  | 237.16 |         |        |         |        | L   | 817.44  | 409.22 | 800.41  | 400.71 | 799.43  | 400.22 | 8     |
| 5  | 530.33  | 265.67 |         |        |         |        | G   | 704.36  | 352.68 | 687.33  | 344.17 | 686.35  | 343.68 | 7     |
| 6  | 659.38  | 330.19 |         |        | 641.37  | 321.19 | E   | 647.34  | 324.17 | 630.31  | 315.66 | 629.33  | 315.17 | 6     |
| 7  | 787.43  | 394.22 | 770.41  | 385.71 | 769.42  | 385.22 | Q   | 518.29  | 259.65 | 501.27  | 251.14 | 500.28  | 250.64 | 5     |
| 8  | 874.47  | 437.74 | 857.44  | 429.22 | 856.46  | 428.73 | S   | 390.23  | 195.62 | 373.21  | 187.11 | 372.22  | 186.62 | 4     |
| 9  | 973.54  | 487.27 | 956.51  | 478.76 | 955.52  | 478.27 | V   | 303.2   | 152.1  | 286.18  | 143.59 |         |        | 3     |
| 10 | 1030.56 | 515.78 | 1013.53 | 507.27 | 1012.55 | 506.78 | G   | 204.13  | 102.57 | 187.11  | 94.06  |         |        | 2     |
| 11 |         |        |         |        |         |        | K   | 147.11  | 74.06  | 130.09  | 65.55  |         |        | 1     |

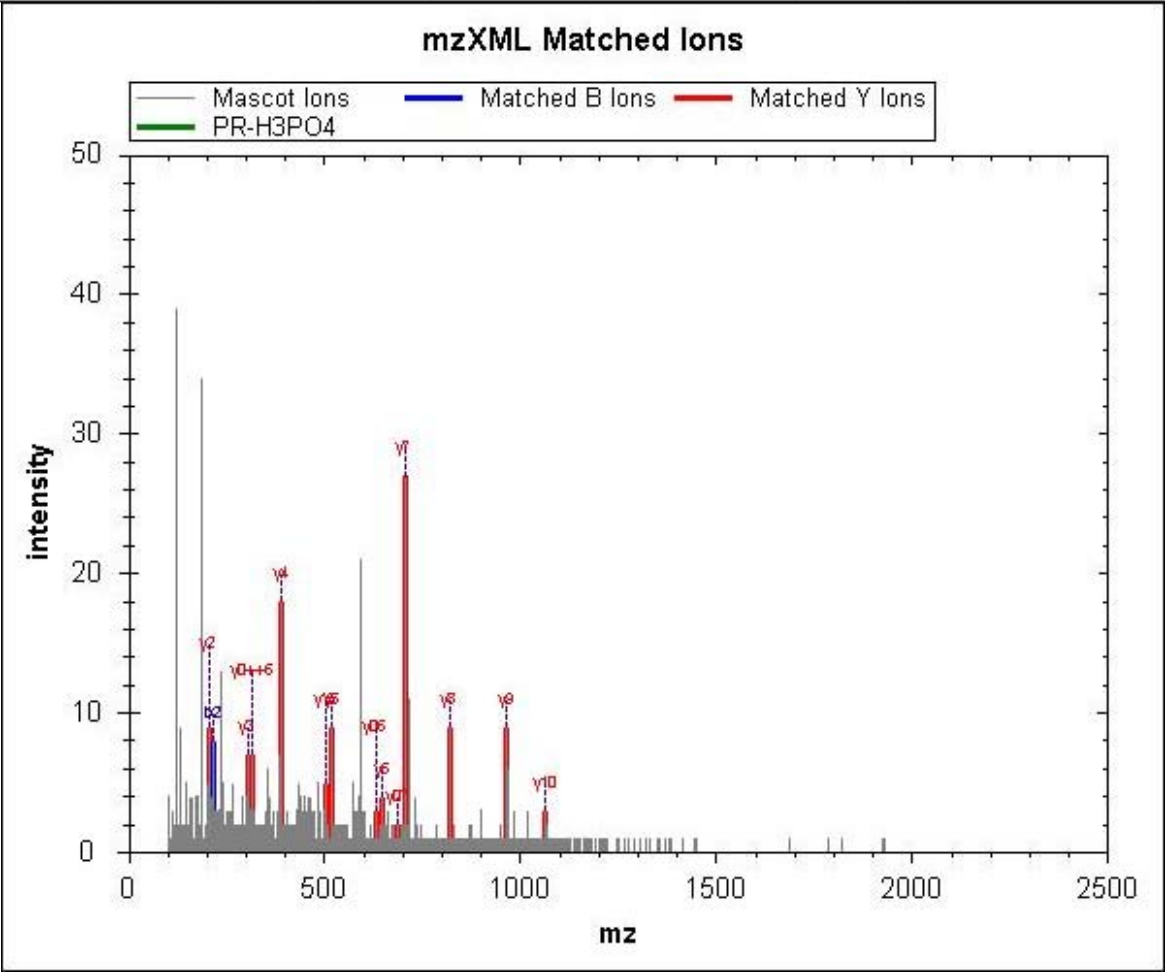

Protein index=1122, ACC No:IPI00295066

Peptide index=3374 MS/MS spectrum

Sequence: ARPELEELLAK, m/z:634.8633, charge:+ 2, Modification: , Mod Position:

Score: 69.39, Raw data:WET\_B5\_090616\_01.mzxml, MS/MS Elution time: 52.0535, Scan number:2797, Mass delta:-0.0026, Rank:1

| No | b | b++ | b* | b*++ | b0 | b0++ | Seq | y | y++ | y* | y*++ | y0 | y0++ | RevNo |
|----|---|-----|----|------|----|------|-----|---|-----|----|------|----|------|-------|
|----|---|-----|----|------|----|------|-----|---|-----|----|------|----|------|-------|

|    |         |        |         |        |         |        |   |         |        |         |        |         |        |    |
|----|---------|--------|---------|--------|---------|--------|---|---------|--------|---------|--------|---------|--------|----|
| 1  | 72.04   | 36.53  |         |        |         |        | A |         |        |         |        |         |        | 11 |
| 2  | 228.15  | 114.58 | 211.12  | 106.06 |         |        | R | 1197.68 | 599.35 | 1180.66 | 590.83 | 1179.67 | 590.34 | 10 |
| 3  | 325.2   | 163.1  | 308.17  | 154.59 |         |        | P | 1041.58 | 521.29 | 1024.56 | 512.78 | 1023.57 | 512.29 | 9  |
| 4  | 454.24  | 227.62 | 437.21  | 219.11 | 436.23  | 218.62 | E | 944.53  | 472.77 | 927.5   | 464.26 | 926.52  | 463.76 | 8  |
| 5  | 567.32  | 284.17 | 550.3   | 275.65 | 549.31  | 275.16 | L | 815.49  | 408.25 | 798.46  | 399.73 | 797.48  | 399.24 | 7  |
| 6  | 696.37  | 348.69 | 679.34  | 340.17 | 678.36  | 339.68 | E | 702.4   | 351.71 | 685.38  | 343.19 | 684.39  | 342.7  | 6  |
| 7  | 825.41  | 413.21 | 808.38  | 404.7  | 807.4   | 404.2  | E | 573.36  | 287.18 | 556.33  | 278.67 | 555.35  | 278.18 | 5  |
| 8  | 938.49  | 469.75 | 921.47  | 461.24 | 920.48  | 460.75 | L | 444.32  | 222.66 | 427.29  | 214.15 |         |        | 4  |
| 9  | 1051.58 | 526.29 | 1034.55 | 517.78 | 1033.57 | 517.29 | L | 331.23  | 166.12 | 314.21  | 157.61 |         |        | 3  |
| 10 | 1122.62 | 561.81 | 1105.59 | 553.3  | 1104.6  | 552.81 | A | 218.15  | 109.58 | 201.12  | 101.07 |         |        | 2  |
| 11 |         |        |         |        |         |        | K | 147.11  | 74.06  | 130.09  | 65.55  |         |        | 1  |

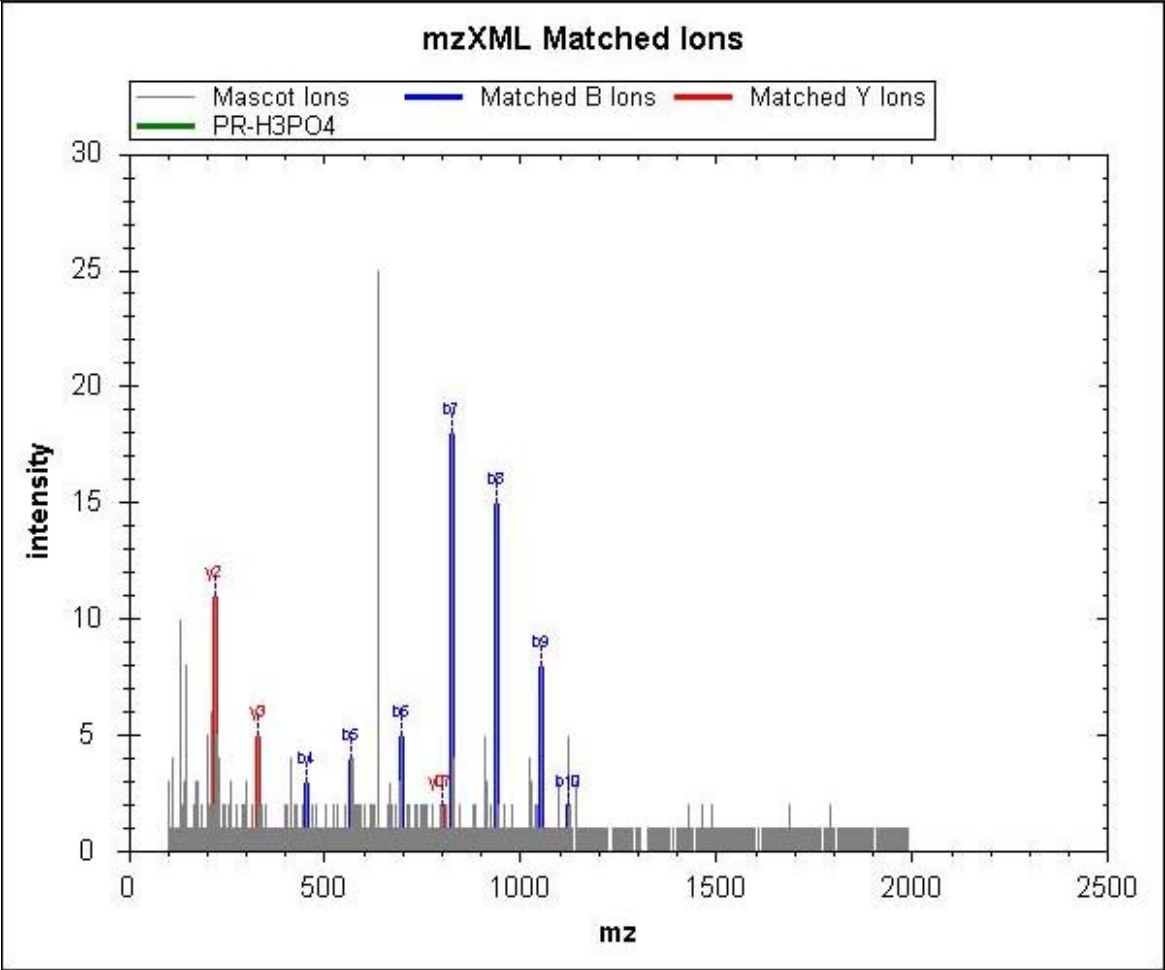

Protein index=1125, ACC No: IPI00008437

Peptide index=3574 MS/MS spectrum

Sequence: ELTVDNSFEFEK, m/z:729.3374, charge:+ 2, Modification: , Mod Position:

Score: 41.55, Raw data:WET\_B5\_090616\_01.mzxml, MS/MS Elution time: 53.83833, Scan number:2900, Mass delta:-0.0123, Rank:1

| No | b      | b++   | b* | b*++ | b0     | b0++  | Seq | y | y++ | y* | y*++ | y0 | y0++ | RevNo |
|----|--------|-------|----|------|--------|-------|-----|---|-----|----|------|----|------|-------|
| 1  | 130.05 | 65.53 |    |      | 112.04 | 56.52 | E   |   |     |    |      |    |      | 12    |



|    |         |        |         |        |         |        |   |         |        |         |        |         |        |    |
|----|---------|--------|---------|--------|---------|--------|---|---------|--------|---------|--------|---------|--------|----|
| 2  | 215.14  | 108.07 |         |        | 197.13  | 99.07  | T | 1390.74 | 695.87 | 1373.71 | 687.36 | 1372.73 | 686.87 | 13 |
| 3  | 312.19  | 156.6  |         |        | 294.18  | 147.59 | P | 1289.69 | 645.35 | 1272.67 | 636.84 | 1271.68 | 636.34 | 12 |
| 4  | 425.28  | 213.14 |         |        | 407.27  | 204.14 | I | 1192.64 | 596.82 | 1175.61 | 588.31 | 1174.63 | 587.82 | 11 |
| 5  | 526.32  | 263.67 |         |        | 508.31  | 254.66 | T | 1079.56 | 540.28 | 1062.53 | 531.77 | 1061.54 | 531.28 | 10 |
| 6  | 689.39  | 345.2  |         |        | 671.38  | 336.19 | Y | 978.51  | 489.76 | 961.48  | 481.24 |         |        | 9  |
| 7  | 786.44  | 393.72 |         |        | 768.43  | 384.72 | P | 815.44  | 408.23 | 798.42  | 399.71 |         |        | 8  |
| 8  | 914.5   | 457.75 | 897.47  | 449.24 | 896.49  | 448.75 | Q | 718.39  | 359.7  | 701.37  | 351.19 |         |        | 7  |
| 9  | 971.52  | 486.26 | 954.49  | 477.75 | 953.51  | 477.26 | G | 590.33  | 295.67 | 573.31  | 287.16 |         |        | 6  |
| 10 | 1084.6  | 542.81 | 1067.58 | 534.29 | 1066.59 | 533.8  | L | 533.31  | 267.16 | 516.28  | 258.65 |         |        | 5  |
| 11 | 1155.64 | 578.32 | 1138.61 | 569.81 | 1137.63 | 569.32 | A | 420.23  | 210.62 | 403.2   | 202.1  |         |        | 4  |
| 12 | 1286.68 | 643.84 | 1269.65 | 635.33 | 1268.67 | 634.84 | M | 349.19  | 175.1  | 332.16  | 166.59 |         |        | 3  |
| 13 | 1357.72 | 679.36 | 1340.69 | 670.85 | 1339.71 | 670.36 | A | 218.15  | 109.58 | 201.12  | 101.07 |         |        | 2  |
| 14 |         |        |         |        |         |        | K | 147.11  | 74.06  | 130.09  | 65.55  |         |        | 1  |

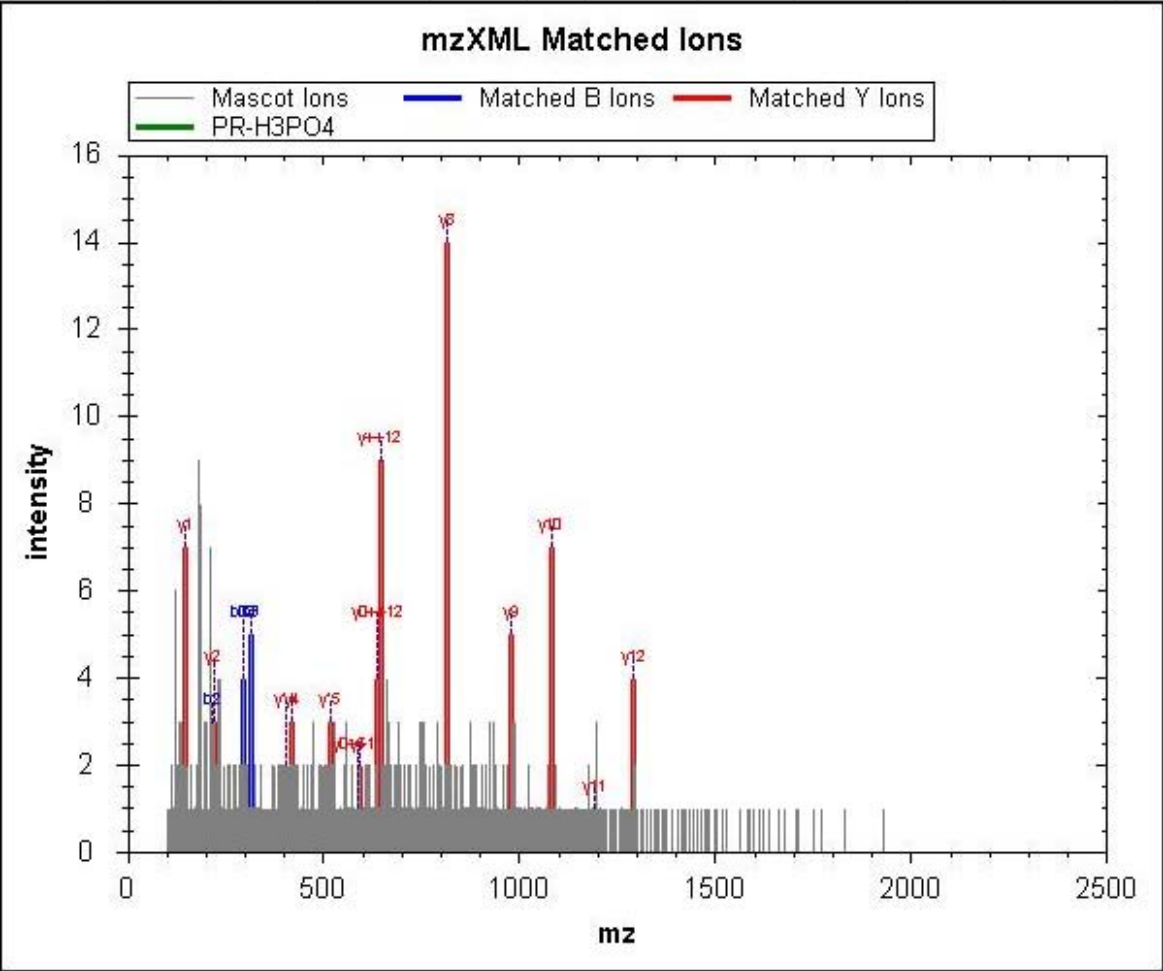

Protein index=1127, ACC No: IPI00041325

Peptide index=4194 MS/MS spectrum

Sequence: TYQELLVNQNPIAQPLASR, m/z:1078.069, charge:+ 2, Modification: , Mod Position:

Score: 134.41, Raw data:WET\_A5\_090615\_01.mzxml, MS/MS Elution time: 59.96767, Scan number:3275, Mass delta:-0.0196, Rank:1



Protein index=1137, ACC No: IPI00305551

Peptide index=76 MS/MS spectrum

Sequence: KDLLEDK, m/z:430.7298, charge:+ 2, Modification: , Mod Position:

Score: 32.61, Raw data:WET\_A5\_090615\_01.mzxml, MS/MS Elution time: 15.40322, Scan number:659, Mass delta:-0.0201, Rank:1

| No | b      | b++    | b*     | b*++   | b0     | b0++   | Seq | y      | y++    | y*     | y*++   | y0     | y0++   | RevNo |
|----|--------|--------|--------|--------|--------|--------|-----|--------|--------|--------|--------|--------|--------|-------|
| 1  | 129.1  | 65.05  | 112.08 | 56.54  |        |        | K   |        |        |        |        |        |        | 7     |
| 2  | 244.13 | 122.57 | 227.1  | 114.05 | 226.12 | 113.56 | D   | 732.38 | 366.69 | 715.35 | 358.18 | 714.37 | 357.69 | 6     |
| 3  | 357.21 | 179.11 | 340.19 | 170.6  | 339.2  | 170.1  | L   | 617.35 | 309.18 | 600.32 | 300.67 | 599.34 | 300.17 | 5     |
| 4  | 470.3  | 235.65 | 453.27 | 227.14 | 452.29 | 226.65 | L   | 504.27 | 252.64 | 487.24 | 244.12 | 486.26 | 243.63 | 4     |
| 5  | 599.34 | 300.17 | 582.31 | 291.66 | 581.33 | 291.17 | E   | 391.18 | 196.09 | 374.16 | 187.58 | 373.17 | 187.09 | 3     |
| 6  | 714.37 | 357.69 | 697.34 | 349.17 | 696.36 | 348.68 | D   | 262.14 | 131.57 | 245.11 | 123.06 | 244.13 | 122.57 | 2     |
| 7  |        |        |        |        |        |        | K   | 147.11 | 74.06  | 130.09 | 65.55  |        |        | 1     |

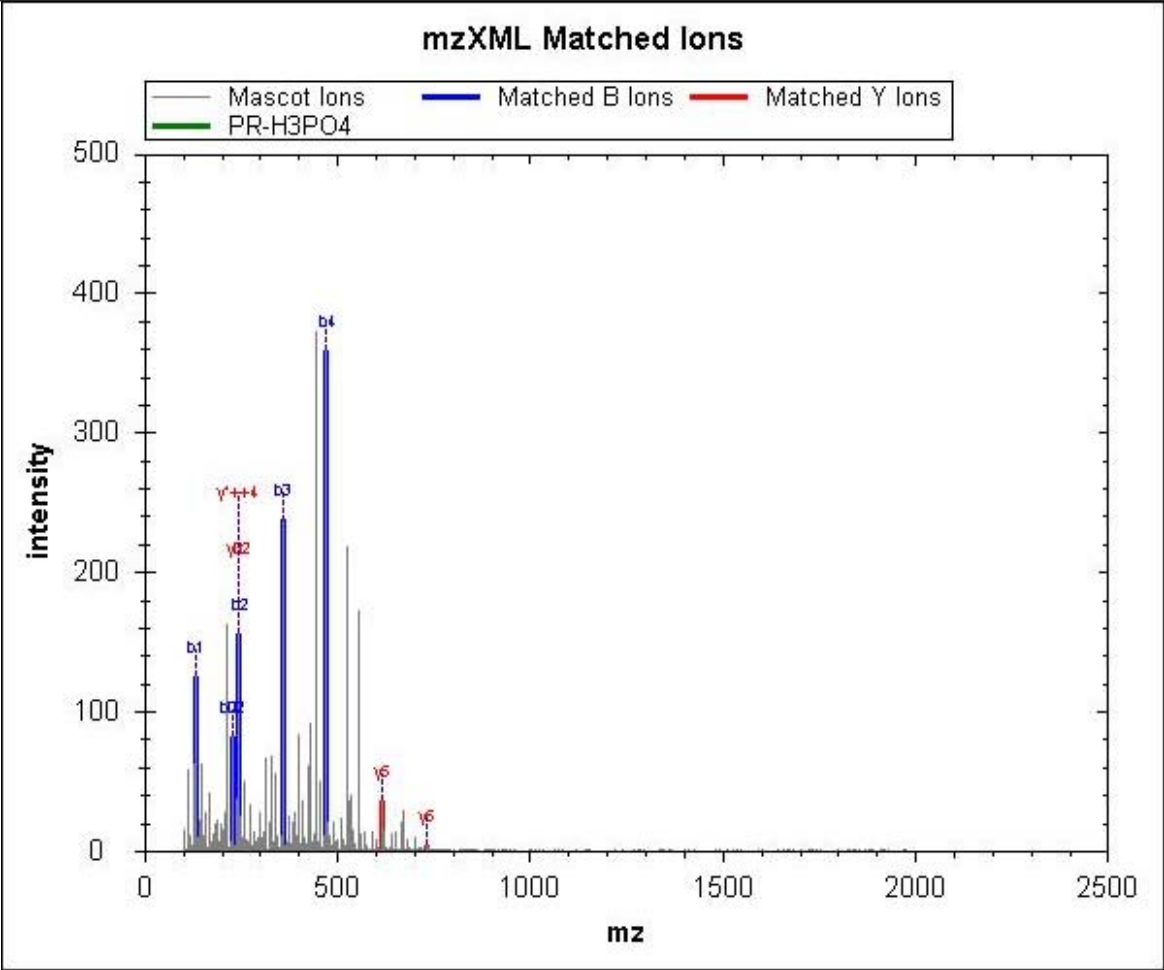

Protein index=1138, ACC No: IPI00332157

Peptide index=1820 MS/MS spectrum

Sequence: TLEELDPESR, m/z:594.7935, charge:+ 2, Modification: , Mod Position:

Score: 47.88, Raw data:WET\_A5\_090615\_01.mzxml, MS/MS Elution time: 38.00767, Scan number:1989, Mass delta:0.0055, Rank:1

| No | b       | b++    | b0     | b0++   | Seq | y       | y++    | y*     | y*++   | y0      | y0++   | RevNo |
|----|---------|--------|--------|--------|-----|---------|--------|--------|--------|---------|--------|-------|
| 1  | 102.05  | 51.53  | 84.04  | 42.53  | T   |         |        |        |        |         |        | 10    |
| 2  | 215.14  | 108.07 | 197.13 | 99.07  | L   | 1087.53 | 544.27 | 1070.5 | 535.75 | 1069.52 | 535.26 | 9     |
| 3  | 344.18  | 172.59 | 326.17 | 163.59 | E   | 974.44  | 487.72 | 957.42 | 479.21 | 956.43  | 478.72 | 8     |
| 4  | 473.22  | 237.12 | 455.21 | 228.11 | E   | 845.4   | 423.2  | 828.37 | 414.69 | 827.39  | 414.2  | 7     |
| 5  | 586.31  | 293.66 | 568.3  | 284.65 | L   | 716.36  | 358.68 | 699.33 | 350.17 | 698.35  | 349.68 | 6     |
| 6  | 701.34  | 351.17 | 683.32 | 342.17 | D   | 603.27  | 302.14 | 586.25 | 293.63 | 585.26  | 293.13 | 5     |
| 7  | 798.39  | 399.7  | 780.38 | 390.69 | P   | 488.25  | 244.63 | 471.22 | 236.11 | 470.24  | 235.62 | 4     |
| 8  | 927.43  | 464.22 | 909.42 | 455.21 | E   | 391.19  | 196.1  | 374.17 | 187.59 | 373.18  | 187.1  | 3     |
| 9  | 1014.46 | 507.73 | 996.45 | 498.73 | S   | 262.15  | 131.58 | 245.12 | 123.07 | 244.14  | 122.57 | 2     |
| 10 |         |        |        |        | R   | 175.12  | 88.06  | 158.09 | 79.55  |         |        | 1     |

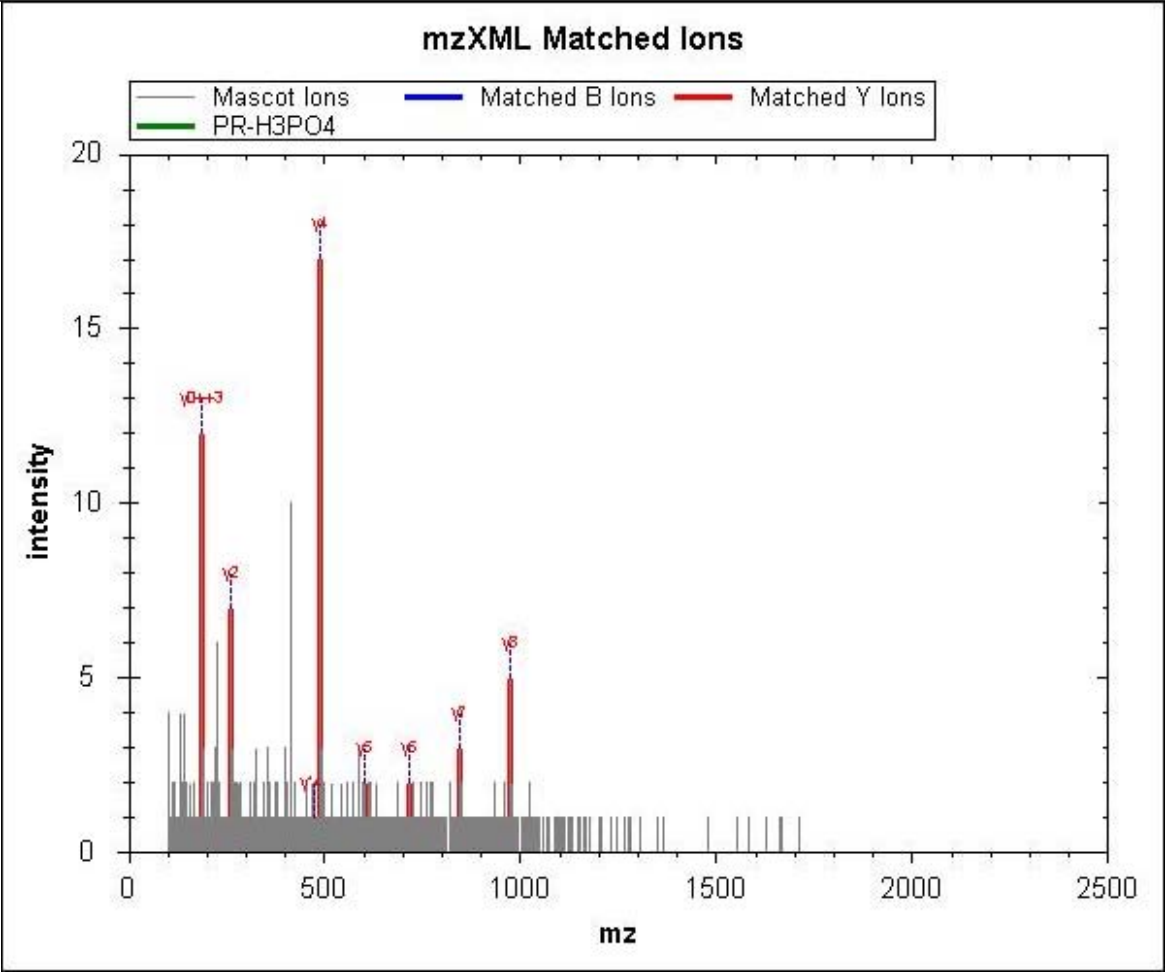

Protein index=1143, ACC No:IPI00177428

Peptide index=1220 MS/MS spectrum

Sequence: KPAEQAEETAPIEATATKEEEGSS, m/z:835.0562, charge:+ 3, Modification: , Mod Position:  
Score: 43.84, Raw data:WET\_A5\_090615\_01.mzxml, MS/MS Elution time: 30.80217, Scan number:1567, Mass delta:-0.0141, Rank:1

| No | b       | b++     | b*      | b*++    | b0      | b0++    | Seq | y       | y++     | y*      | y*++    | y0      | y0++    | RevNo |
|----|---------|---------|---------|---------|---------|---------|-----|---------|---------|---------|---------|---------|---------|-------|
| 1  | 129.1   | 65.05   | 112.08  | 56.54   |         |         | K   |         |         |         |         |         |         | 24    |
| 2  | 226.15  | 113.58  | 209.13  | 105.07  |         |         | P   | 2375.07 | 1188.04 | 2358.05 | 1179.53 | 2357.06 | 1179.04 | 23    |
| 3  | 297.19  | 149.1   | 280.17  | 140.59  |         |         | A   | 2278.02 | 1139.51 | 2260.99 | 1131    | 2260.01 | 1130.51 | 22    |
| 4  | 426.23  | 213.62  | 409.21  | 205.11  | 408.22  | 204.62  | E   | 2206.98 | 1104    | 2189.96 | 1095.48 | 2188.97 | 1094.99 | 21    |
| 5  | 554.29  | 277.65  | 537.27  | 269.14  | 536.28  | 268.64  | Q   | 2077.94 | 1039.47 | 2060.91 | 1030.96 | 2059.93 | 1030.47 | 20    |
| 6  | 625.33  | 313.17  | 608.3   | 304.66  | 607.32  | 304.16  | A   | 1949.88 | 975.44  | 1932.86 | 966.93  | 1931.87 | 966.44  | 19    |
| 7  | 754.37  | 377.69  | 737.35  | 369.18  | 736.36  | 368.68  | E   | 1878.85 | 939.93  | 1861.82 | 931.41  | 1860.83 | 930.92  | 18    |
| 8  | 883.42  | 442.21  | 866.39  | 433.7   | 865.41  | 433.21  | E   | 1749.8  | 875.4   | 1732.78 | 866.89  | 1731.79 | 866.4   | 17    |
| 9  | 984.46  | 492.74  | 967.44  | 484.22  | 966.45  | 483.73  | T   | 1620.76 | 810.88  | 1603.73 | 802.37  | 1602.75 | 801.88  | 16    |
| 10 | 1055.5  | 528.25  | 1038.47 | 519.74  | 1037.49 | 519.25  | A   | 1519.71 | 760.36  | 1502.69 | 751.85  | 1501.7  | 751.35  | 15    |
| 11 | 1152.55 | 576.78  | 1135.53 | 568.27  | 1134.54 | 567.77  | P   | 1448.68 | 724.84  | 1431.65 | 716.33  | 1430.66 | 715.84  | 14    |
| 12 | 1265.64 | 633.32  | 1248.61 | 624.81  | 1247.63 | 624.32  | I   | 1351.62 | 676.31  | 1334.6  | 667.8   | 1333.61 | 667.31  | 13    |
| 13 | 1394.68 | 697.84  | 1377.65 | 689.33  | 1376.67 | 688.84  | E   | 1238.54 | 619.77  | 1221.51 | 611.26  | 1220.53 | 610.77  | 12    |
| 14 | 1465.72 | 733.36  | 1448.69 | 724.85  | 1447.71 | 724.36  | A   | 1109.5  | 555.25  | 1092.47 | 546.74  | 1091.49 | 546.25  | 11    |
| 15 | 1566.76 | 783.89  | 1549.74 | 775.37  | 1548.75 | 774.88  | T   | 1038.46 | 519.73  | 1021.43 | 511.22  | 1020.45 | 510.73  | 10    |
| 16 | 1637.8  | 819.4   | 1620.78 | 810.89  | 1619.79 | 810.4   | A   | 937.41  | 469.21  | 920.38  | 460.7   | 919.4   | 460.2   | 9     |
| 17 | 1738.85 | 869.93  | 1721.82 | 861.42  | 1720.84 | 860.92  | T   | 866.37  | 433.69  | 849.35  | 425.18  | 848.36  | 424.69  | 8     |
| 18 | 1866.94 | 933.98  | 1849.92 | 925.46  | 1848.93 | 924.97  | K   | 765.33  | 383.17  | 748.3   | 374.65  | 747.32  | 374.16  | 7     |
| 19 | 1995.99 | 998.5   | 1978.96 | 989.98  | 1977.98 | 989.49  | E   | 637.23  | 319.12  |         |         | 619.22  | 310.11  | 6     |
| 20 | 2125.03 | 1063.02 | 2108    | 1054.51 | 2107.02 | 1054.01 | E   | 508.19  | 254.6   |         |         | 490.18  | 245.59  | 5     |
| 21 | 2254.07 | 1127.54 | 2237.05 | 1119.03 | 2236.06 | 1118.53 | E   | 379.15  | 190.08  |         |         | 361.14  | 181.07  | 4     |
| 22 | 2311.09 | 1156.05 | 2294.07 | 1147.54 | 2293.08 | 1147.05 | G   | 250.1   | 125.56  |         |         | 232.09  | 116.55  | 3     |
| 23 | 2398.13 | 1199.57 | 2381.1  | 1191.05 | 2380.12 | 1190.56 | S   | 193.08  | 97.04   |         |         | 175.07  | 88.04   | 2     |
| 24 |         |         |         |         |         |         | S   | 106.05  | 53.53   |         |         | 88.04   | 44.52   | 1     |

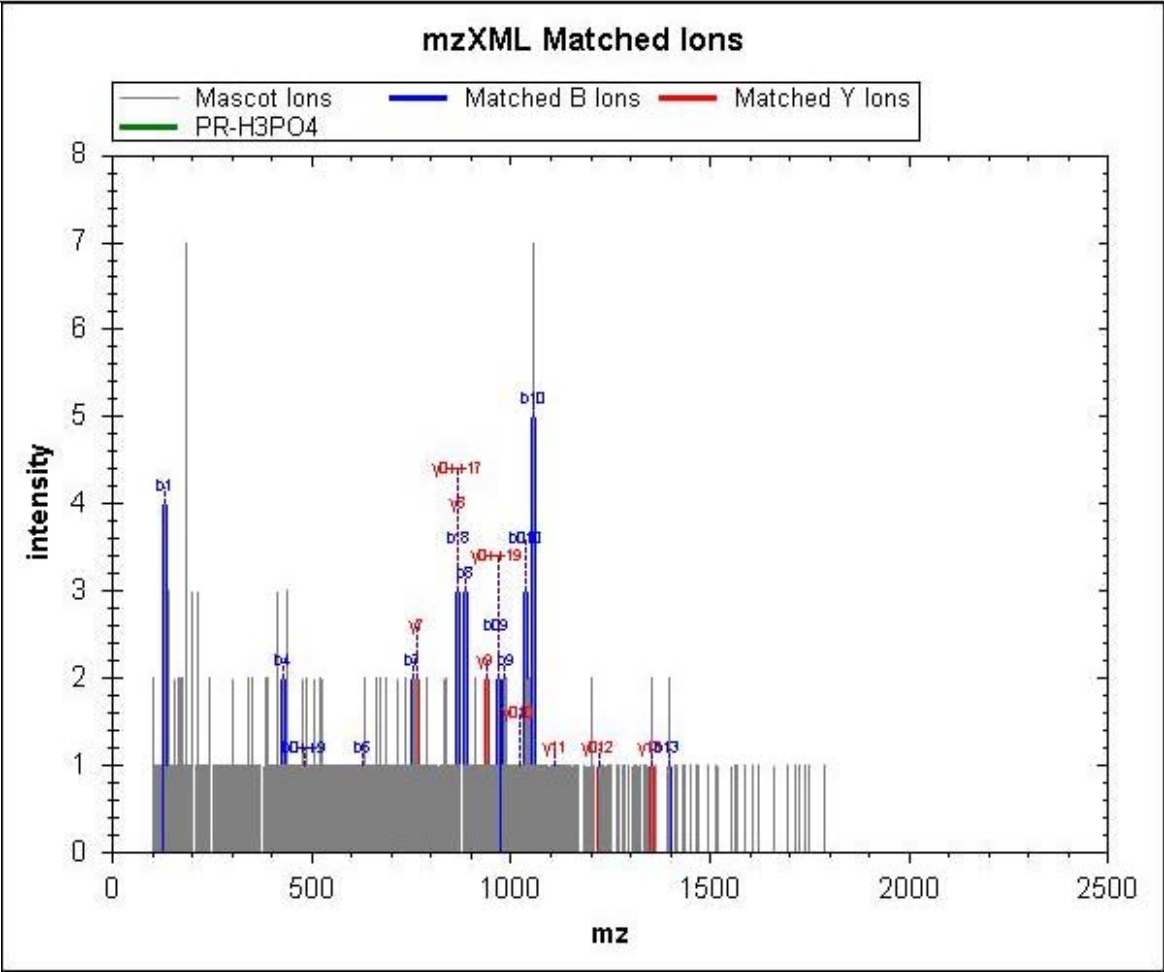

Protein index=1144, ACC No: IPI00549343

Peptide index=2484 MS/MS spectrum

Sequence: ADALQAGASQFETSAAK, m/z:833.4056, charge:+ 2, Modification: , Mod Position:

Score: 64.39, Raw data:WET\_A5\_090615\_01.mzxml, MS/MS Elution time: 44.396, Scan number:2363, Mass delta:-0.0039, Rank:1

| No | b       | b++    | b*      | b*++   | b0      | b0++   | Seq | y       | y++    | y*      | y*++   | y0      | y0++   | RevNo |
|----|---------|--------|---------|--------|---------|--------|-----|---------|--------|---------|--------|---------|--------|-------|
| 1  | 72.04   | 36.53  |         |        |         |        | A   |         |        |         |        |         |        | 17    |
| 2  | 187.07  | 94.04  |         |        | 169.06  | 85.03  | D   | 1594.77 | 797.89 | 1577.74 | 789.38 | 1576.76 | 788.88 | 16    |
| 3  | 258.11  | 129.56 |         |        | 240.1   | 120.55 | A   | 1479.74 | 740.38 | 1462.72 | 731.86 | 1461.73 | 731.37 | 15    |
| 4  | 371.19  | 186.1  |         |        | 353.18  | 177.09 | L   | 1408.71 | 704.86 | 1391.68 | 696.34 | 1390.7  | 695.85 | 14    |
| 5  | 499.25  | 250.13 | 482.22  | 241.62 | 481.24  | 241.12 | Q   | 1295.62 | 648.32 | 1278.6  | 639.8  | 1277.61 | 639.31 | 13    |
| 6  | 570.29  | 285.65 | 553.26  | 277.13 | 552.28  | 276.64 | A   | 1167.56 | 584.29 | 1150.54 | 575.77 | 1149.55 | 575.28 | 12    |
| 7  | 627.31  | 314.16 | 610.28  | 305.65 | 609.3   | 305.15 | G   | 1096.53 | 548.77 | 1079.5  | 540.25 | 1078.52 | 539.76 | 11    |
| 8  | 698.35  | 349.68 | 681.32  | 341.16 | 680.34  | 340.67 | A   | 1039.51 | 520.26 | 1022.48 | 511.74 | 1021.49 | 511.25 | 10    |
| 9  | 785.38  | 393.19 | 768.35  | 384.68 | 767.37  | 384.19 | S   | 968.47  | 484.74 | 951.44  | 476.22 | 950.46  | 475.73 | 9     |
| 10 | 913.44  | 457.22 | 896.41  | 448.71 | 895.43  | 448.22 | Q   | 881.44  | 441.22 | 864.41  | 432.71 | 863.43  | 432.22 | 8     |
| 11 | 1060.51 | 530.76 | 1043.48 | 522.24 | 1042.5  | 521.75 | F   | 753.38  | 377.19 | 736.35  | 368.68 | 735.37  | 368.19 | 7     |
| 12 | 1189.55 | 595.28 | 1172.52 | 586.76 | 1171.54 | 586.27 | E   | 606.31  | 303.66 | 589.28  | 295.15 | 588.3   | 294.65 | 6     |

|    |         |        |         |        |         |        |   |        |        |        |        |        |        |   |
|----|---------|--------|---------|--------|---------|--------|---|--------|--------|--------|--------|--------|--------|---|
| 13 | 1290.6  | 645.8  | 1273.57 | 637.29 | 1272.59 | 636.8  | T | 477.27 | 239.14 | 460.24 | 230.62 | 459.26 | 230.13 | 5 |
| 14 | 1377.63 | 689.32 | 1360.6  | 680.8  | 1359.62 | 680.31 | S | 376.22 | 188.61 | 359.19 | 180.1  | 358.21 | 179.61 | 4 |
| 15 | 1448.67 | 724.84 | 1431.64 | 716.32 | 1430.65 | 715.83 | A | 289.19 | 145.1  | 272.16 | 136.58 |        |        | 3 |
| 16 | 1519.7  | 760.35 | 1502.68 | 751.84 | 1501.69 | 751.35 | A | 218.15 | 109.58 | 201.12 | 101.07 |        |        | 2 |
| 17 |         |        |         |        |         |        | K | 147.11 | 74.06  | 130.09 | 65.55  |        |        | 1 |

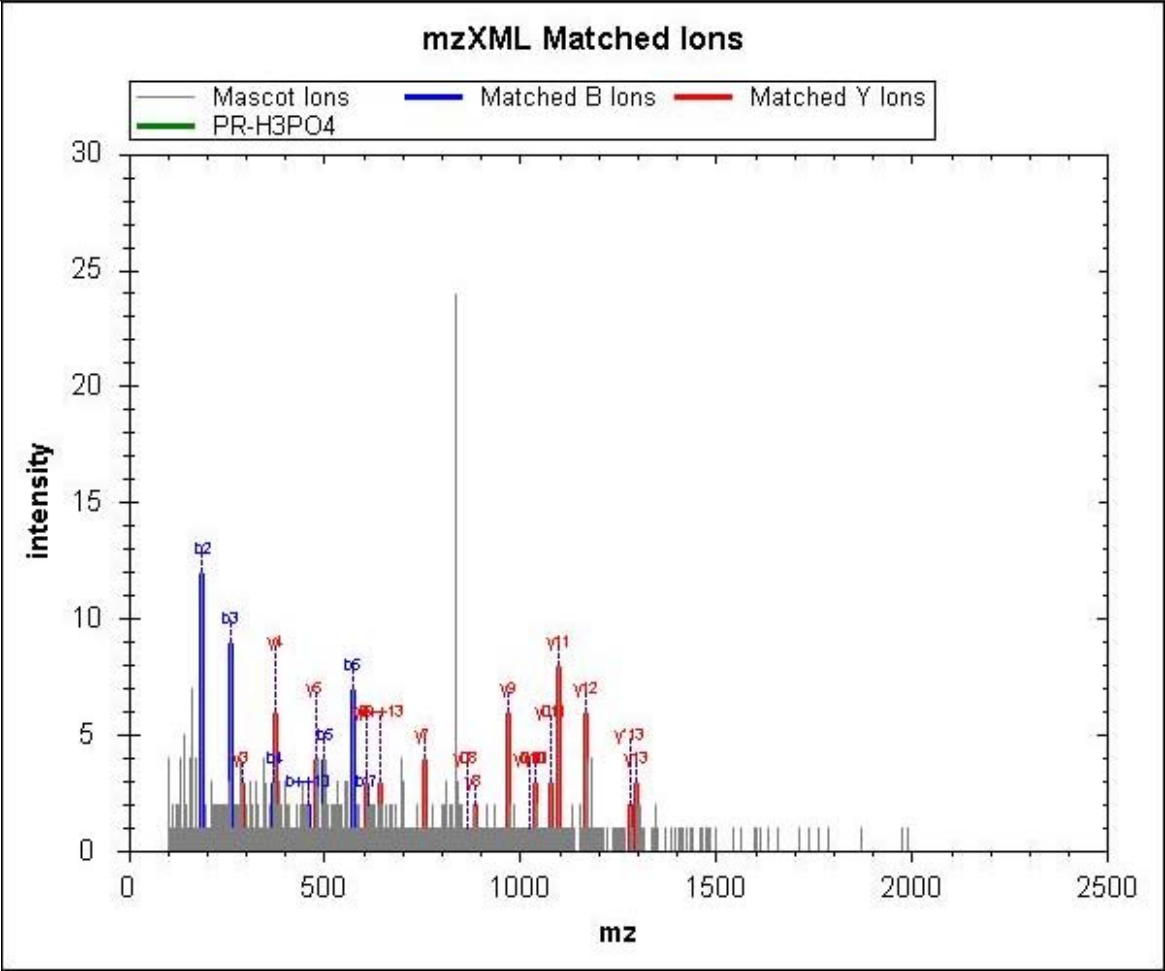

Protein index=1145, ACC No:IPI00005050

Peptide index=396 MS/MS spectrum

Sequence: HLADHGQLSGIQR, m/z:477.9142, charge:+ 3, Modification: , Mod Position:

Score: 42.97, Raw data:WET\_A5\_090615\_01.mzxml, MS/MS Elution time: 18.95433, Scan number:867, Mass delta:-0.017, Rank:1

| No | b      | b++    | b*     | b*++   | b0     | b0++   | Seq | y       | y++    | y*      | y*++   | y0      | y0++   | RevNo |
|----|--------|--------|--------|--------|--------|--------|-----|---------|--------|---------|--------|---------|--------|-------|
| 1  | 138.07 | 69.54  |        |        |        |        | H   |         |        |         |        |         |        | 13    |
| 2  | 251.15 | 126.08 |        |        |        |        | L   | 1294.69 | 647.85 | 1277.66 | 639.33 | 1276.68 | 638.84 | 12    |
| 3  | 322.19 | 161.6  |        |        |        |        | A   | 1181.6  | 591.3  | 1164.58 | 582.79 | 1163.59 | 582.3  | 11    |
| 4  | 437.21 | 219.11 |        |        | 419.2  | 210.11 | D   | 1110.56 | 555.79 | 1093.54 | 547.27 | 1092.55 | 546.78 | 10    |
| 5  | 574.27 | 287.64 |        |        | 556.26 | 278.63 | H   | 995.54  | 498.27 | 978.51  | 489.76 | 977.53  | 489.27 | 9     |
| 6  | 631.29 | 316.15 |        |        | 613.28 | 307.15 | G   | 858.48  | 429.74 | 841.45  | 421.23 | 840.47  | 420.74 | 8     |
| 7  | 759.35 | 380.18 | 742.33 | 371.67 | 741.34 | 371.17 | Q   | 801.46  | 401.23 | 784.43  | 392.72 | 783.45  | 392.23 | 7     |

|    |         |        |         |        |         |        |   |        |        |        |        |        |        |   |
|----|---------|--------|---------|--------|---------|--------|---|--------|--------|--------|--------|--------|--------|---|
| 8  | 872.44  | 436.72 | 855.41  | 428.21 | 854.43  | 427.72 | L | 673.4  | 337.2  | 656.37 | 328.69 | 655.39 | 328.2  | 6 |
| 9  | 959.47  | 480.24 | 942.44  | 471.73 | 941.46  | 471.23 | S | 560.32 | 280.66 | 543.29 | 272.15 | 542.3  | 271.66 | 5 |
| 10 | 1016.49 | 508.75 | 999.46  | 500.24 | 998.48  | 499.74 | G | 473.28 | 237.15 | 456.26 | 228.63 |        |        | 4 |
| 11 | 1129.57 | 565.29 | 1112.55 | 556.78 | 1111.56 | 556.29 | I | 416.26 | 208.63 | 399.24 | 200.12 |        |        | 3 |
| 12 | 1257.63 | 629.32 | 1240.61 | 620.81 | 1239.62 | 620.32 | Q | 303.18 | 152.09 | 286.15 | 143.58 |        |        | 2 |
| 13 |         |        |         |        |         |        | R | 175.12 | 88.06  | 158.09 | 79.55  |        |        | 1 |

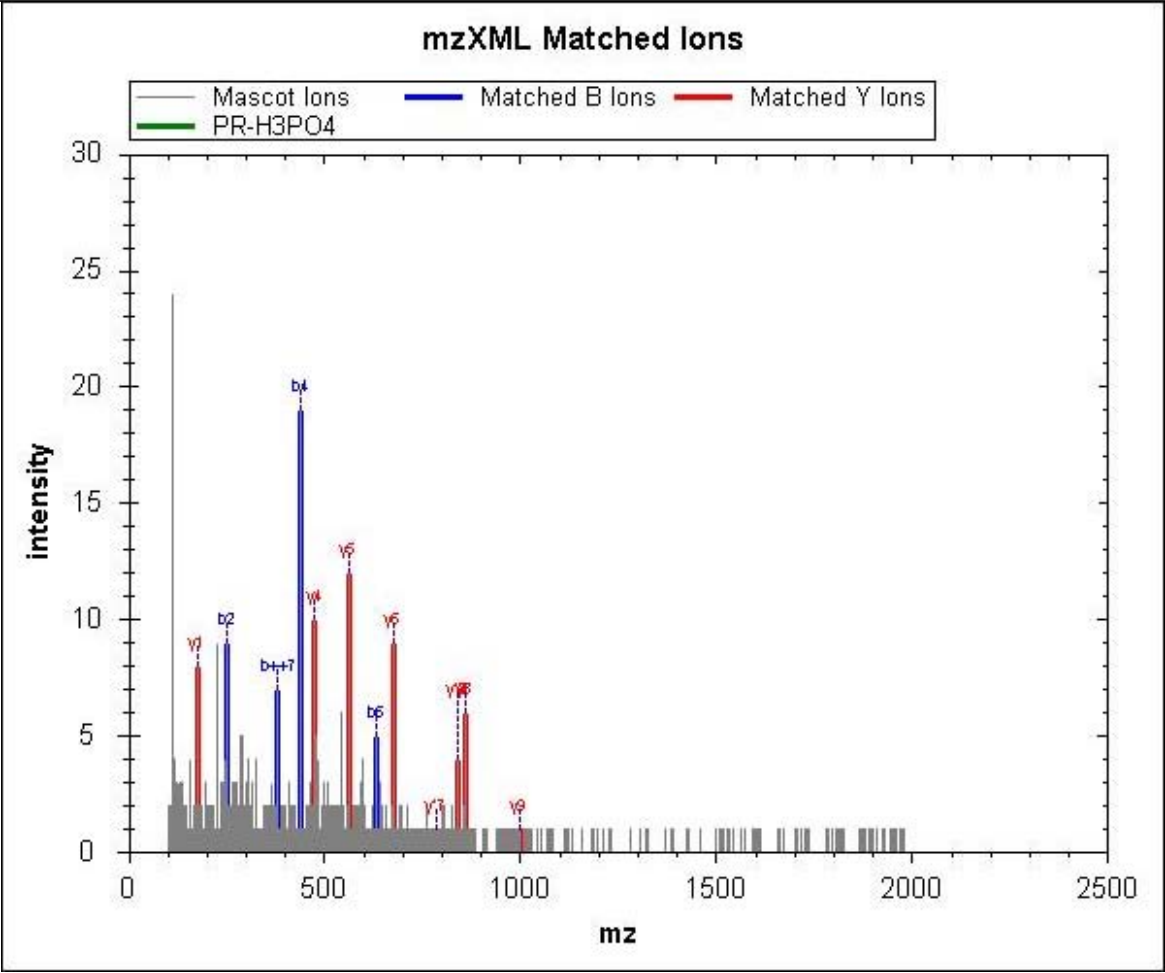

Protein index=1147, ACC No: IPI00555902

Peptide index=6012 MS/MS spectrum

Sequence: VALAGLLGFGGLGK, m/z:608.3765, charge:+ 2, Modification: , Mod Position:

Score: 69.8, Raw data:WET\_B5\_090616\_02.mzxml, MS/MS Elution time: 81.15401, Scan number:4520, Mass delta:0.0015, Rank:1

| No | b      | b++    | Seq | y       | y++    | y*      | y*++   | RevNo |
|----|--------|--------|-----|---------|--------|---------|--------|-------|
| 1  | 100.08 | 50.54  | V   |         |        |         |        | 13    |
| 2  | 171.11 | 86.06  | A   | 1116.68 | 558.84 | 1099.65 | 550.33 | 12    |
| 3  | 284.2  | 142.6  | L   | 1045.64 | 523.32 | 1028.61 | 514.81 | 11    |
| 4  | 355.23 | 178.12 | A   | 932.56  | 466.78 | 915.53  | 458.27 | 10    |
| 5  | 412.26 | 206.63 | G   | 861.52  | 431.26 | 844.49  | 422.75 | 9     |
| 6  | 525.34 | 263.17 | L   | 804.5   | 402.75 | 787.47  | 394.24 | 8     |

|    |         |        |   |        |        |        |        |   |
|----|---------|--------|---|--------|--------|--------|--------|---|
| 7  | 638.42  | 319.72 | L | 691.41 | 346.21 | 674.39 | 337.7  | 7 |
| 8  | 695.45  | 348.23 | G | 578.33 | 289.67 | 561.3  | 281.16 | 6 |
| 9  | 842.51  | 421.76 | F | 521.31 | 261.16 | 504.28 | 252.64 | 5 |
| 10 | 899.53  | 450.27 | G | 374.24 | 187.62 | 357.21 | 179.11 | 4 |
| 11 | 1012.62 | 506.81 | L | 317.22 | 159.11 | 300.19 | 150.6  | 3 |
| 12 | 1069.64 | 535.32 | G | 204.13 | 102.57 | 187.11 | 94.06  | 2 |
| 13 |         |        | K | 147.11 | 74.06  | 130.09 | 65.55  | 1 |

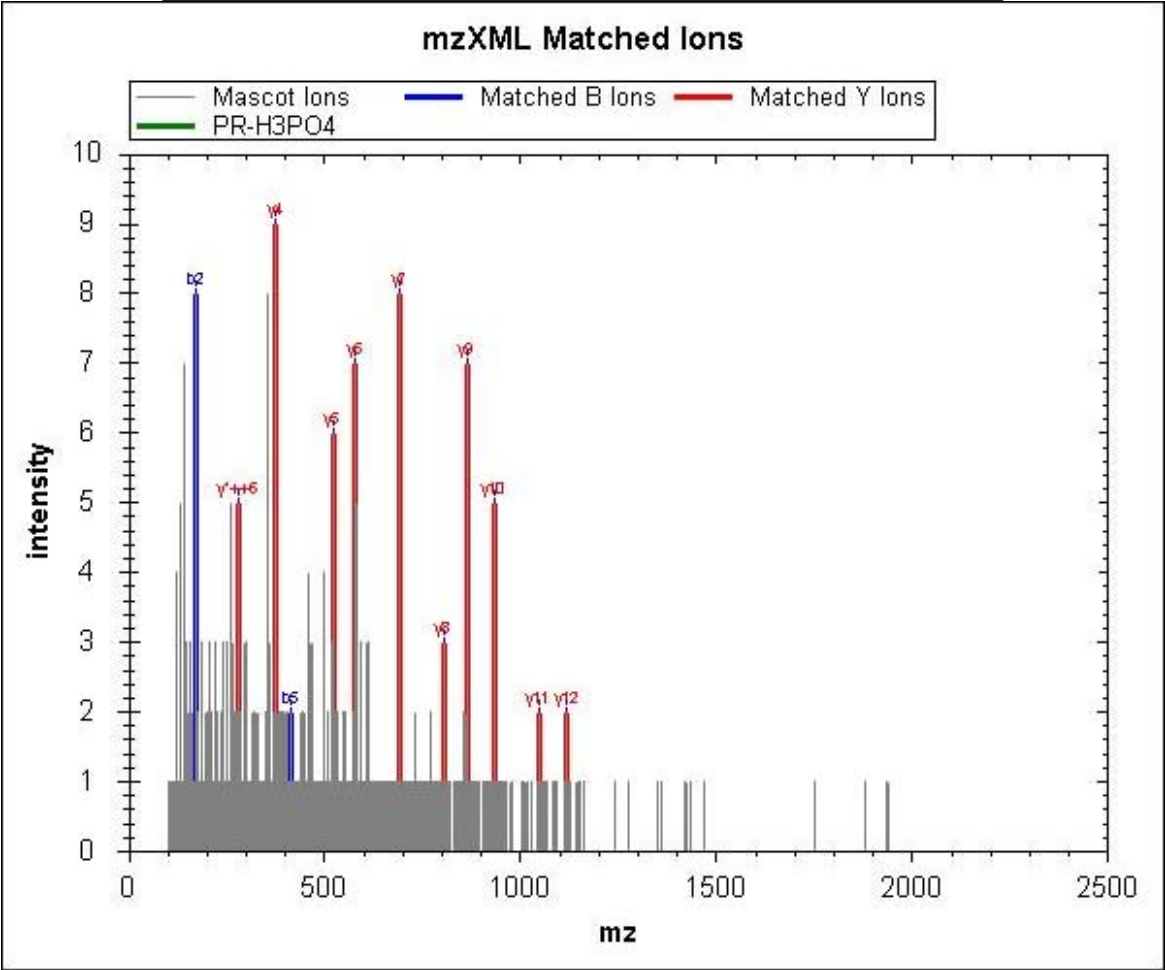

Protein index=1148, ACC No: IPI00009607

Peptide index=1340 MS/MS spectrum

Sequence: VVVLGSGGVGK, m/z:486.2948, charge:+ 2, Modification: , Mod Position:

Score: 42.17, Raw data:WET\_B5\_090616\_03.mzxml, MS/MS Elution time: 32.41417, Scan number:1660, Mass delta:0.0035, Rank:1

| No | b      | b++    | b0 | b0++ | Seq | y      | y++    | y*     | y*++   | y0     | y0++   | RevNo |
|----|--------|--------|----|------|-----|--------|--------|--------|--------|--------|--------|-------|
| 1  | 100.08 | 50.54  |    |      | V   |        |        |        |        |        |        | 11    |
| 2  | 199.14 | 100.08 |    |      | V   | 872.52 | 436.76 | 855.49 | 428.25 | 854.51 | 427.76 | 10    |
| 3  | 298.21 | 149.61 |    |      | V   | 773.45 | 387.23 | 756.42 | 378.72 | 755.44 | 378.22 | 9     |
| 4  | 411.3  | 206.15 |    |      | L   | 674.38 | 337.7  | 657.36 | 329.18 | 656.37 | 328.69 | 8     |
| 5  | 468.32 | 234.66 |    |      | G   | 561.3  | 281.15 | 544.27 | 272.64 | 543.29 | 272.15 | 7     |

|    |        |        |        |        |   |        |        |        |        |        |        |   |
|----|--------|--------|--------|--------|---|--------|--------|--------|--------|--------|--------|---|
| 6  | 555.35 | 278.18 | 537.34 | 269.17 | S | 504.28 | 252.64 | 487.25 | 244.13 | 486.27 | 243.64 | 6 |
| 7  | 612.37 | 306.69 | 594.36 | 297.68 | G | 417.25 | 209.13 | 400.22 | 200.61 |        |        | 5 |
| 8  | 669.39 | 335.2  | 651.38 | 326.19 | G | 360.22 | 180.62 | 343.2  | 172.1  |        |        | 4 |
| 9  | 768.46 | 384.73 | 750.45 | 375.73 | V | 303.2  | 152.1  | 286.18 | 143.59 |        |        | 3 |
| 10 | 825.48 | 413.25 | 807.47 | 404.24 | G | 204.13 | 102.57 | 187.11 | 94.06  |        |        | 2 |
| 11 |        |        |        |        | K | 147.11 | 74.06  | 130.09 | 65.55  |        |        | 1 |

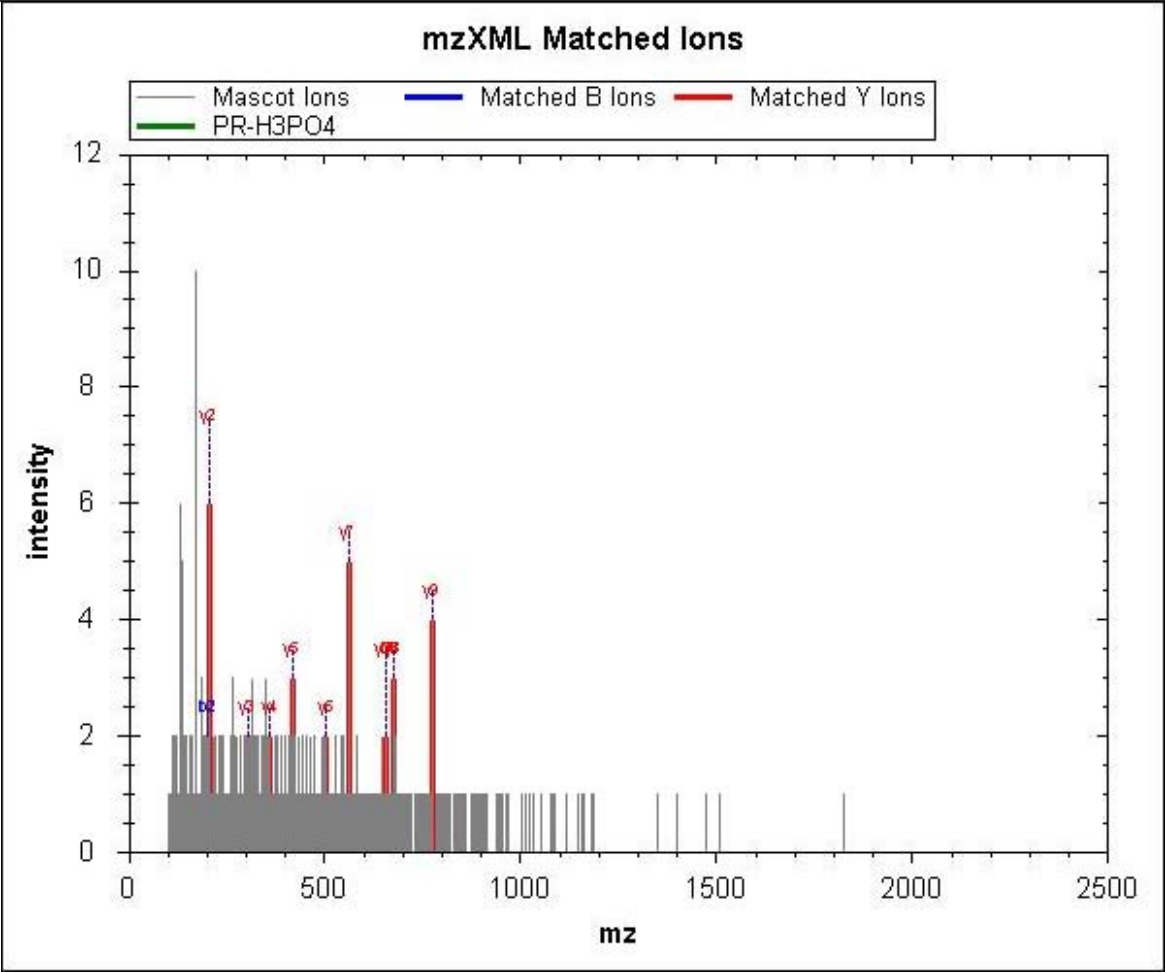

Protein index=1152, ACC No:IP100018691

Peptide index=1989 MS/MS spectrum

Sequence: WAPGSVKPIYK, m/z:623.3518, charge:+ 2, Modification: , Mod Position:

Score: 35.49, Raw data:WET\_A5\_090615\_01.mzxml, MS/MS Elution time: 39.68133, Scan number:2087, Mass delta:-0.0027, Rank:1

| No | b      | b++    | b* | b*++ | b0     | b0++   | Seq | y       | y++    | y*      | y*++   | y0      | y0++   | RevNo |
|----|--------|--------|----|------|--------|--------|-----|---------|--------|---------|--------|---------|--------|-------|
| 1  | 187.09 | 94.05  |    |      |        |        | W   |         |        |         |        |         |        | 11    |
| 2  | 258.12 | 129.57 |    |      |        |        | A   | 1059.62 | 530.31 | 1042.59 | 521.8  | 1041.61 | 521.31 | 10    |
| 3  | 355.18 | 178.09 |    |      |        |        | P   | 988.58  | 494.79 | 971.56  | 486.28 | 970.57  | 485.79 | 9     |
| 4  | 412.2  | 206.6  |    |      |        |        | G   | 891.53  | 446.27 | 874.5   | 437.76 | 873.52  | 437.26 | 8     |
| 5  | 499.23 | 250.12 |    |      | 481.22 | 241.11 | S   | 834.51  | 417.76 | 817.48  | 409.24 | 816.5   | 408.75 | 7     |
| 6  | 598.3  | 299.65 |    |      | 580.29 | 290.65 | V   | 747.48  | 374.24 | 730.45  | 365.73 |         |        | 6     |

|    |         |        |         |        |         |        |   |        |        |        |        |  |  |   |
|----|---------|--------|---------|--------|---------|--------|---|--------|--------|--------|--------|--|--|---|
| 7  | 726.39  | 363.7  | 709.37  | 355.19 | 708.38  | 354.7  | K | 648.41 | 324.71 | 631.38 | 316.19 |  |  | 5 |
| 8  | 823.45  | 412.23 | 806.42  | 403.71 | 805.44  | 403.22 | P | 520.31 | 260.66 | 503.29 | 252.15 |  |  | 4 |
| 9  | 936.53  | 468.77 | 919.5   | 460.26 | 918.52  | 459.76 | I | 423.26 | 212.13 | 406.23 | 203.62 |  |  | 3 |
| 10 | 1099.59 | 550.3  | 1082.57 | 541.79 | 1081.58 | 541.3  | Y | 310.18 | 155.59 | 293.15 | 147.08 |  |  | 2 |
| 11 |         |        |         |        |         |        | K | 147.11 | 74.06  | 130.09 | 65.55  |  |  | 1 |

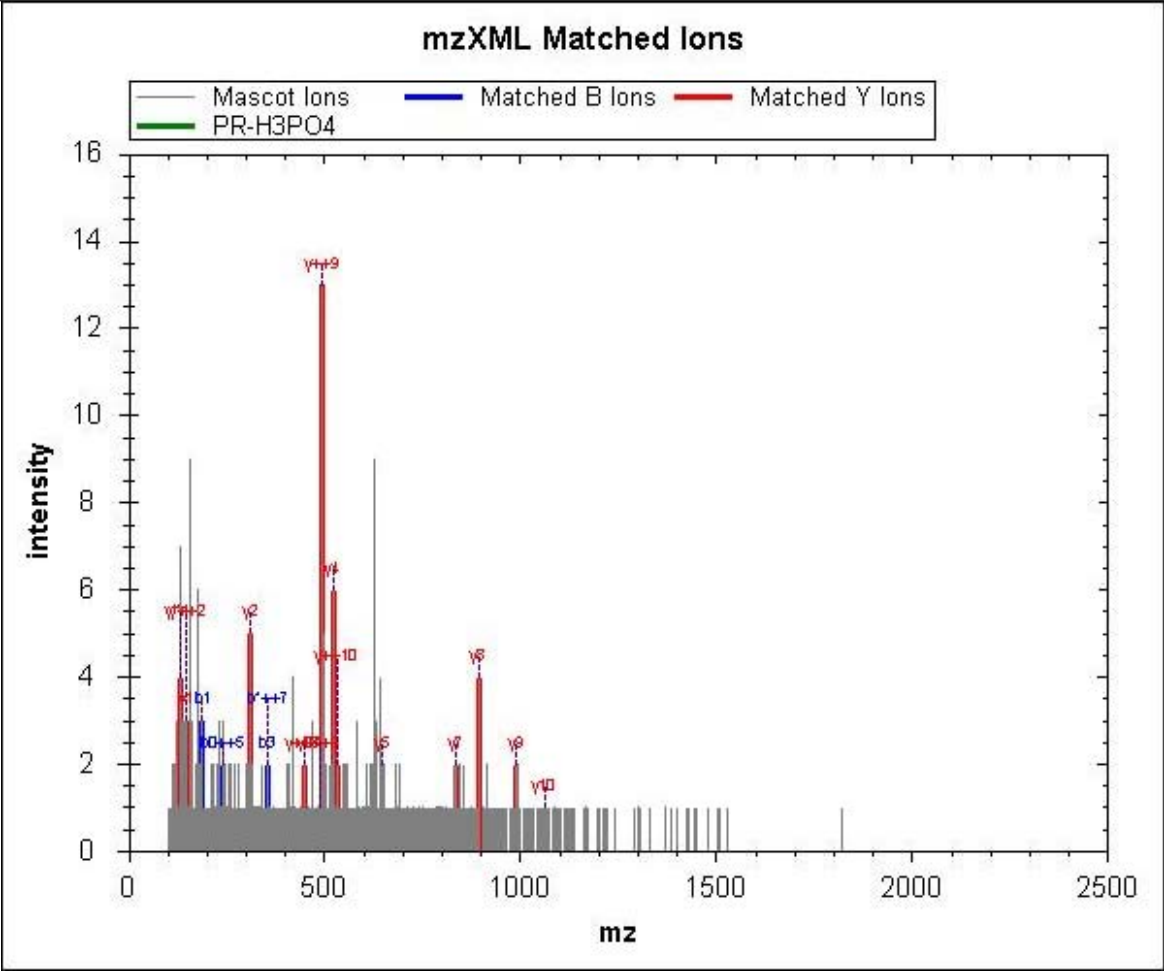

Protein index=1155, ACC No: IPI00176489

Peptide index=1982 MS/MS spectrum

Sequence: GLELLLR, m/z:407.2313, charge:+ 2, Modification: , Mod Position:

Score: 40.78, Raw data:WET\_A5\_090615\_03.mzxml, MS/MS Elution time: 39.42483, Scan number:2067, Mass delta:-0.0526, Rank:1

| No | b      | b++    | b0     | b0++   | Seq | y      | y++    | y*     | y*++   | y0     | y0++   | RevNo |
|----|--------|--------|--------|--------|-----|--------|--------|--------|--------|--------|--------|-------|
| 1  | 58.03  | 29.52  |        |        | G   |        |        |        |        |        |        | 7     |
| 2  | 171.11 | 86.06  |        |        | L   | 756.5  | 378.75 | 739.47 | 370.24 | 738.49 | 369.75 | 6     |
| 3  | 300.16 | 150.58 | 282.14 | 141.58 | E   | 643.41 | 322.21 | 626.39 | 313.7  | 625.4  | 313.21 | 5     |
| 4  | 413.24 | 207.12 | 395.23 | 198.12 | L   | 514.37 | 257.69 | 497.34 | 249.18 |        |        | 4     |
| 5  | 526.32 | 263.67 | 508.31 | 254.66 | L   | 401.29 | 201.15 | 384.26 | 192.63 |        |        | 3     |
| 6  | 639.41 | 320.21 | 621.4  | 311.2  | L   | 288.2  | 144.61 | 271.18 | 136.09 |        |        | 2     |
| 7  |        |        |        |        | R   | 175.12 | 88.06  | 158.09 | 79.55  |        |        | 1     |

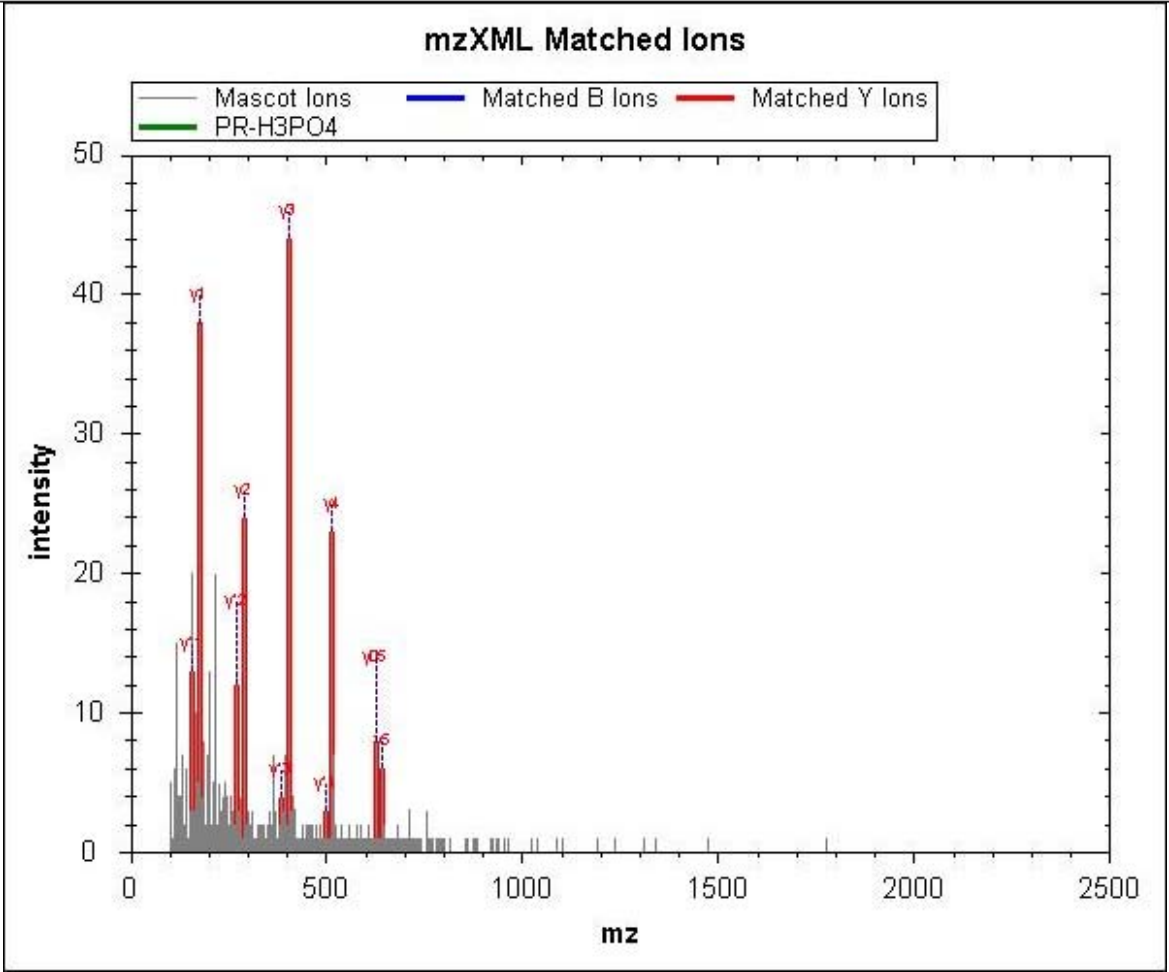

Protein index=1161, ACC No:IPI00414860

Peptide index=2993 MS/MS spectrum

Sequence: TVAGGAWTYNTTSAVTVK, m/z:913.9629, charge:+ 2, Modification: , Mod Position:

Score: 113.17, Raw data:WET\_A5\_090615\_02.mzxml, MS/MS Elution time: 48.95567, Scan number:2623, Mass delta:-0.0072, Rank:1

| No | b       | b++    | b*      | b*++   | b0      | b0++   | Seq | y       | y++    | y*      | y*++   | y0      | y0++   | RevNo |
|----|---------|--------|---------|--------|---------|--------|-----|---------|--------|---------|--------|---------|--------|-------|
| 1  | 102.05  | 51.53  |         |        | 84.04   | 42.53  | T   |         |        |         |        |         |        | 18    |
| 2  | 201.12  | 101.07 |         |        | 183.11  | 92.06  | V   | 1725.88 | 863.44 | 1708.85 | 854.93 | 1707.87 | 854.44 | 17    |
| 3  | 272.16  | 136.58 |         |        | 254.15  | 127.58 | A   | 1626.81 | 813.91 | 1609.79 | 805.4  | 1608.8  | 804.9  | 16    |
| 4  | 329.18  | 165.09 |         |        | 311.17  | 156.09 | G   | 1555.78 | 778.39 | 1538.75 | 769.88 | 1537.76 | 769.39 | 15    |
| 5  | 386.2   | 193.61 |         |        | 368.19  | 184.6  | G   | 1498.75 | 749.88 | 1481.73 | 741.37 | 1480.74 | 740.88 | 14    |
| 6  | 457.24  | 229.12 |         |        | 439.23  | 220.12 | A   | 1441.73 | 721.37 | 1424.71 | 712.86 | 1423.72 | 712.36 | 13    |
| 7  | 643.32  | 322.16 |         |        | 625.31  | 313.16 | W   | 1370.7  | 685.85 | 1353.67 | 677.34 | 1352.68 | 676.85 | 12    |
| 8  | 744.37  | 372.69 |         |        | 726.36  | 363.68 | T   | 1184.62 | 592.81 | 1167.59 | 584.3  | 1166.61 | 583.81 | 11    |
| 9  | 907.43  | 454.22 |         |        | 889.42  | 445.21 | Y   | 1083.57 | 542.29 | 1066.54 | 533.77 | 1065.56 | 533.28 | 10    |
| 10 | 1021.47 | 511.24 | 1004.45 | 502.73 | 1003.46 | 502.24 | N   | 920.5   | 460.76 | 903.48  | 452.24 | 902.49  | 451.75 | 9     |
| 11 | 1122.52 | 561.76 | 1105.49 | 553.25 | 1104.51 | 552.76 | T   | 806.46  | 403.73 | 789.44  | 395.22 | 788.45  | 394.73 | 8     |
| 12 | 1223.57 | 612.29 | 1206.54 | 603.77 | 1205.56 | 603.28 | T   | 705.41  | 353.21 | 688.39  | 344.7  | 687.4   | 344.21 | 7     |

|    |         |        |         |        |         |        |   |        |        |        |        |        |        |   |
|----|---------|--------|---------|--------|---------|--------|---|--------|--------|--------|--------|--------|--------|---|
| 13 | 1310.6  | 655.8  | 1293.57 | 647.29 | 1292.59 | 646.8  | S | 604.37 | 302.69 | 587.34 | 294.17 | 586.36 | 293.68 | 6 |
| 14 | 1381.64 | 691.32 | 1364.61 | 682.81 | 1363.63 | 682.32 | A | 517.33 | 259.17 | 500.31 | 250.66 | 499.32 | 250.17 | 5 |
| 15 | 1480.71 | 740.86 | 1463.68 | 732.34 | 1462.7  | 731.85 | V | 446.3  | 223.65 | 429.27 | 215.14 | 428.29 | 214.65 | 4 |
| 16 | 1581.75 | 791.38 | 1564.73 | 782.87 | 1563.74 | 782.38 | T | 347.23 | 174.12 | 330.2  | 165.6  | 329.22 | 165.11 | 3 |
| 17 | 1680.82 | 840.91 | 1663.8  | 832.4  | 1662.81 | 831.91 | V | 246.18 | 123.59 | 229.15 | 115.08 |        |        | 2 |
| 18 |         |        |         |        |         |        | K | 147.11 | 74.06  | 130.09 | 65.55  |        |        | 1 |

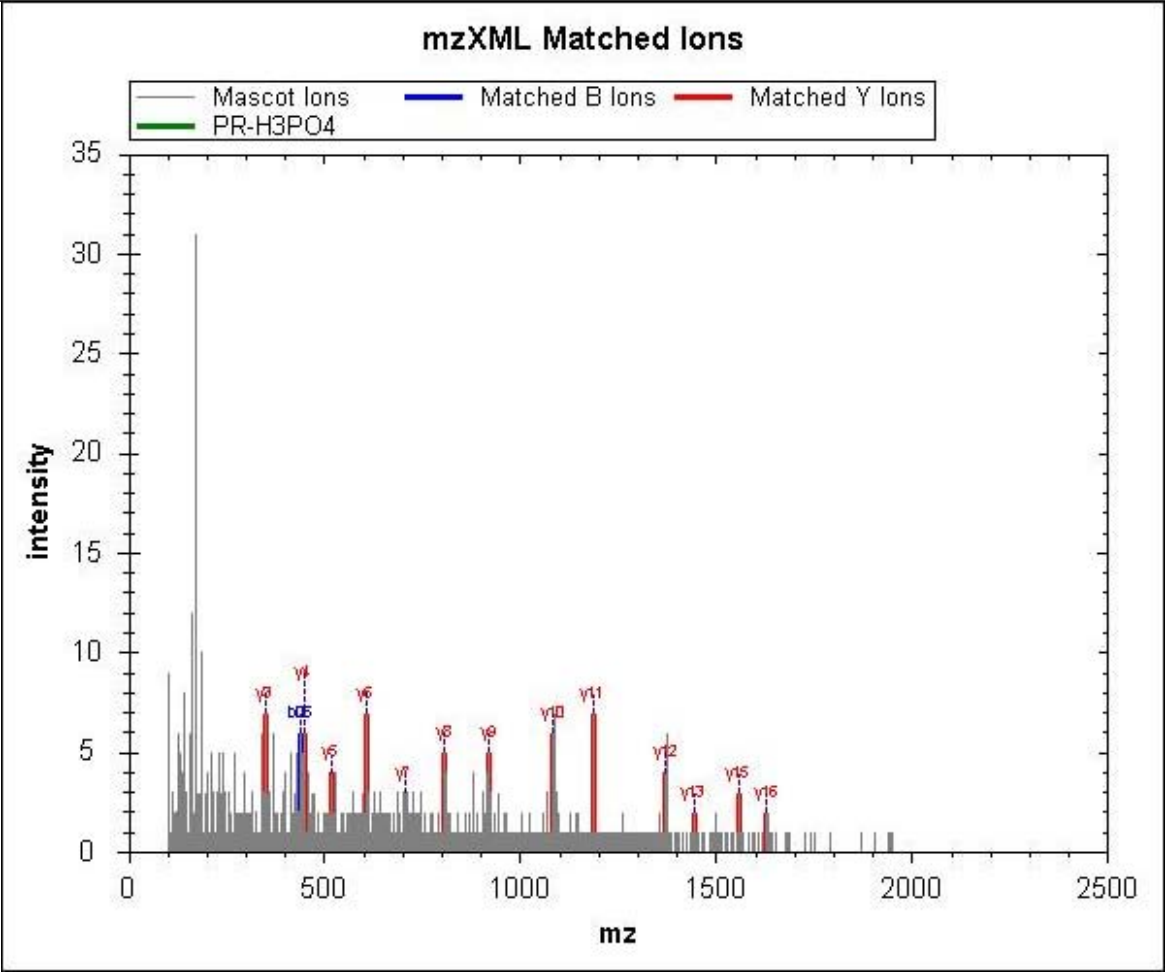

Protein index=1162, ACC No: IPI00000190

Peptide index=3541 MS/MS spectrum

Sequence: QFYDQALQQAVVDDDDANNAK, m/z:1127.022, charge:+ 2, Modification: , Mod Position:

Score: 99.94, Raw data:WET\_B5\_090616\_02.mzxml, MS/MS Elution time: 53.66283, Scan number:2910, Mass delta:0.0045, Rank:1

| No | b      | b++    | b*     | b*++   | b0     | b0++   | Seq | y       | y++    | y*      | y*++    | y0      | y0++    | RevNo |
|----|--------|--------|--------|--------|--------|--------|-----|---------|--------|---------|---------|---------|---------|-------|
| 1  | 129.07 | 65.04  | 112.04 | 56.52  |        |        | Q   |         |        |         |         |         |         | 20    |
| 2  | 276.13 | 138.57 | 259.11 | 130.06 |        |        | F   | 2124.98 | 1063   | 2107.96 | 1054.48 | 2106.97 | 1053.99 | 19    |
| 3  | 439.2  | 220.1  | 422.17 | 211.59 |        |        | Y   | 1977.91 | 989.46 | 1960.89 | 980.95  | 1959.9  | 980.46  | 18    |
| 4  | 554.22 | 277.62 | 537.2  | 269.1  | 536.21 | 268.61 | D   | 1814.85 | 907.93 | 1797.83 | 899.42  | 1796.84 | 898.92  | 17    |
| 5  | 682.28 | 341.65 | 665.26 | 333.13 | 664.27 | 332.64 | Q   | 1699.82 | 850.42 | 1682.8  | 841.9   | 1681.81 | 841.41  | 16    |
| 6  | 753.32 | 377.16 | 736.29 | 368.65 | 735.31 | 368.16 | A   | 1571.77 | 786.39 | 1554.74 | 777.87  | 1553.76 | 777.38  | 15    |

|    |         |         |         |         |         |         |   |         |        |         |        |         |        |    |
|----|---------|---------|---------|---------|---------|---------|---|---------|--------|---------|--------|---------|--------|----|
| 7  | 866.4   | 433.71  | 849.38  | 425.19  | 848.39  | 424.7   | L | 1500.73 | 750.87 | 1483.7  | 742.35 | 1482.72 | 741.86 | 14 |
| 8  | 994.46  | 497.74  | 977.44  | 489.22  | 976.45  | 488.73  | Q | 1387.64 | 694.33 | 1370.62 | 685.81 | 1369.63 | 685.32 | 13 |
| 9  | 1122.52 | 561.76  | 1105.49 | 553.25  | 1104.51 | 552.76  | Q | 1259.59 | 630.3  | 1242.56 | 621.78 | 1241.58 | 621.29 | 12 |
| 10 | 1193.56 | 597.28  | 1176.53 | 588.77  | 1175.55 | 588.28  | A | 1131.53 | 566.27 | 1114.5  | 557.75 | 1113.52 | 557.26 | 11 |
| 11 | 1292.63 | 646.82  | 1275.6  | 638.3   | 1274.62 | 637.81  | V | 1060.49 | 530.75 | 1043.46 | 522.24 | 1042.48 | 521.74 | 10 |
| 12 | 1391.7  | 696.35  | 1374.67 | 687.84  | 1373.68 | 687.35  | V | 961.42  | 481.21 | 944.4   | 472.7  | 943.41  | 472.21 | 9  |
| 13 | 1506.72 | 753.86  | 1489.7  | 745.35  | 1488.71 | 744.86  | D | 862.35  | 431.68 | 845.33  | 423.17 | 844.34  | 422.68 | 8  |
| 14 | 1621.75 | 811.38  | 1604.72 | 802.87  | 1603.74 | 802.37  | D | 747.33  | 374.17 | 730.3   | 365.65 | 729.32  | 365.16 | 7  |
| 15 | 1736.78 | 868.89  | 1719.75 | 860.38  | 1718.77 | 859.89  | D | 632.3   | 316.65 | 615.27  | 308.14 | 614.29  | 307.65 | 6  |
| 16 | 1807.81 | 904.41  | 1790.79 | 895.9   | 1789.8  | 895.41  | A | 517.27  | 259.14 | 500.25  | 250.63 |         |        | 5  |
| 17 | 1921.86 | 961.43  | 1904.83 | 952.92  | 1903.85 | 952.43  | N | 446.24  | 223.62 | 429.21  | 215.11 |         |        | 4  |
| 18 | 2035.9  | 1018.45 | 2018.87 | 1009.94 | 2017.89 | 1009.45 | N | 332.19  | 166.6  | 315.17  | 158.09 |         |        | 3  |
| 19 | 2106.94 | 1053.97 | 2089.91 | 1045.46 | 2088.93 | 1044.97 | A | 218.15  | 109.58 | 201.12  | 101.07 |         |        | 2  |
| 20 |         |         |         |         |         |         | K | 147.11  | 74.06  | 130.09  | 65.55  |         |        | 1  |

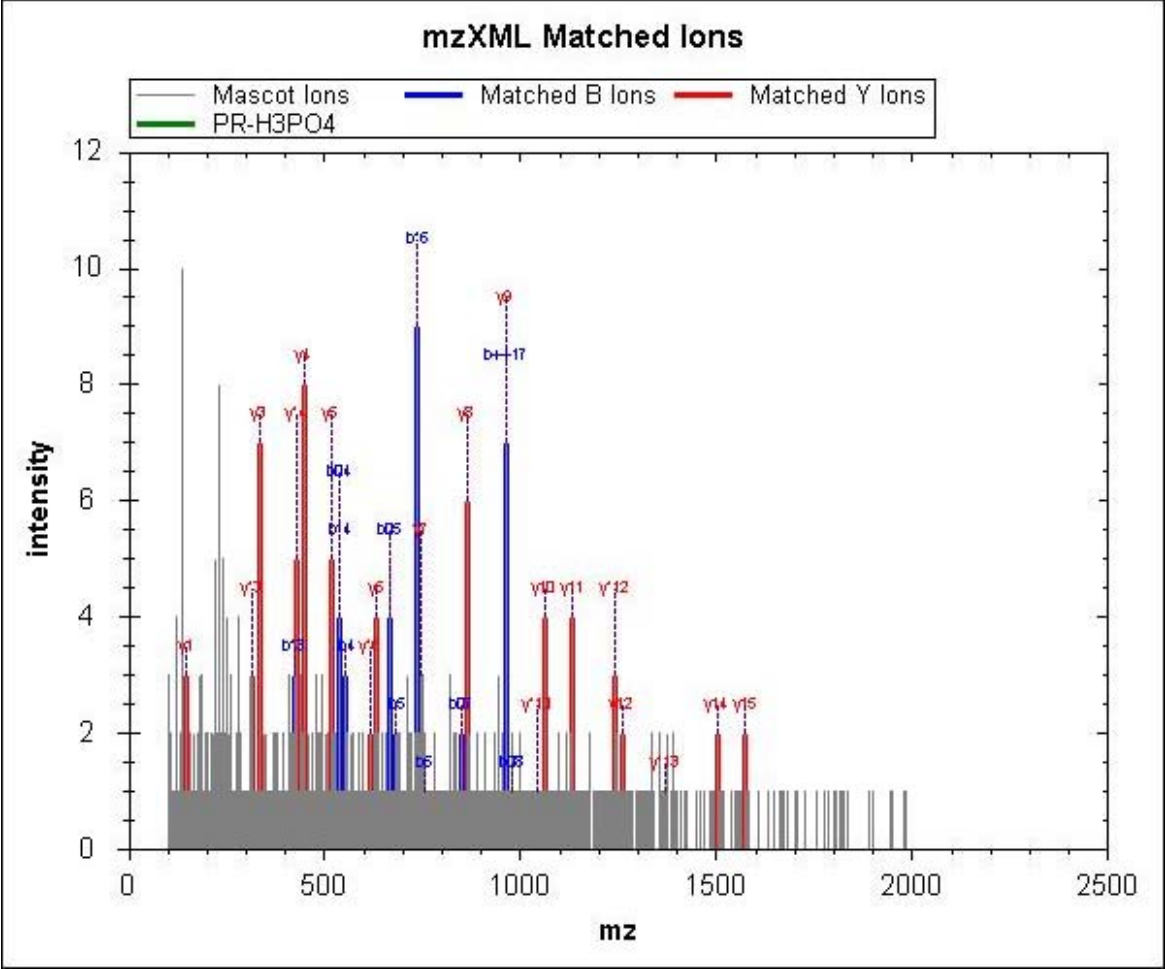

Protein index=1166, ACC No:IP100030919

Peptide index=5099 MS/MS spectrum

Sequence: ELAPLFEELR, m/z:608.834, charge:+ 2, Modification: , Mod Position:

Score: 47.31, Raw data:WET\_B5\_090616\_03.mzxml, MS/MS Elution time: 69.33334, Scan number:3822, Mass delta:0.0003, Rank:1

| No | b       | b++    | b0      | b0++   | Seq | y       | y++    | y*      | y*++   | y0     | y0++   | RevNo |
|----|---------|--------|---------|--------|-----|---------|--------|---------|--------|--------|--------|-------|
| 1  | 130.05  | 65.53  | 112.04  | 56.52  | E   |         |        |         |        |        |        | 10    |
| 2  | 243.13  | 122.07 | 225.12  | 113.07 | L   | 1087.61 | 544.31 | 1070.59 | 535.8  | 1069.6 | 535.31 | 9     |
| 3  | 314.17  | 157.59 | 296.16  | 148.58 | A   | 974.53  | 487.77 | 957.5   | 479.26 | 956.52 | 478.76 | 8     |
| 4  | 411.22  | 206.12 | 393.21  | 197.11 | P   | 903.49  | 452.25 | 886.47  | 443.74 | 885.48 | 443.25 | 7     |
| 5  | 524.31  | 262.66 | 506.3   | 253.65 | L   | 806.44  | 403.72 | 789.41  | 395.21 | 788.43 | 394.72 | 6     |
| 6  | 671.38  | 336.19 | 653.37  | 327.19 | F   | 693.36  | 347.18 | 676.33  | 338.67 | 675.35 | 338.18 | 5     |
| 7  | 800.42  | 400.71 | 782.41  | 391.71 | E   | 546.29  | 273.65 | 529.26  | 265.13 | 528.28 | 264.64 | 4     |
| 8  | 929.46  | 465.23 | 911.45  | 456.23 | E   | 417.25  | 209.13 | 400.22  | 200.61 | 399.24 | 200.12 | 3     |
| 9  | 1042.55 | 521.78 | 1024.54 | 512.77 | L   | 288.2   | 144.61 | 271.18  | 136.09 |        |        | 2     |
| 10 |         |        |         |        | R   | 175.12  | 88.06  | 158.09  | 79.55  |        |        | 1     |

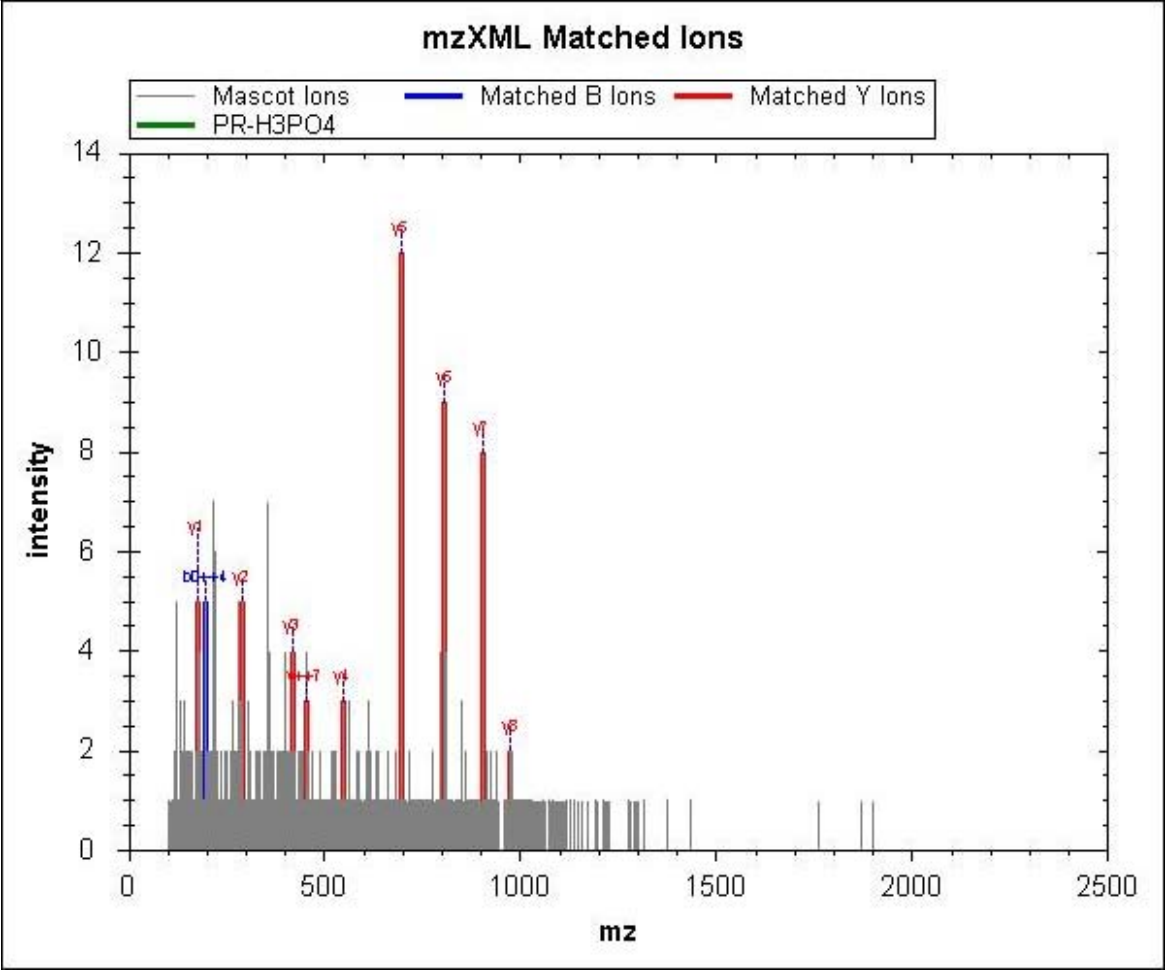

Protein index=1167, ACC No:IPI00219889

Peptide index=5445 MS/MS spectrum

Sequence: TDFEEFFLR, m/z:602.2948, charge:+ 2, Modification: , Mod Position:

Score: 63.3, Raw data:WET\_A5\_090615\_03.mzxml, MS/MS Elution time: 73.52883, Scan number:4064, Mass delta:0.0103, Rank:1

| No | b | b++ | b0 | b0++ | Seq | y | y++ | y* | y*++ | y0 | y0++ | RevNo |
|----|---|-----|----|------|-----|---|-----|----|------|----|------|-------|
|    |   |     |    |      |     |   |     |    |      |    |      |       |

|   |         |        |         |        |   |         |        |         |        |         |        |   |
|---|---------|--------|---------|--------|---|---------|--------|---------|--------|---------|--------|---|
| 1 | 102.05  | 51.53  | 84.04   | 42.53  | T |         |        |         |        |         |        | 9 |
| 2 | 217.08  | 109.04 | 199.07  | 100.04 | D | 1102.52 | 551.76 | 1085.49 | 543.25 | 1084.51 | 542.76 | 8 |
| 3 | 364.15  | 182.58 | 346.14  | 173.57 | F | 987.49  | 494.25 | 970.47  | 485.74 | 969.48  | 485.25 | 7 |
| 4 | 493.19  | 247.1  | 475.18  | 238.09 | E | 840.43  | 420.72 | 823.4   | 412.2  | 822.41  | 411.71 | 6 |
| 5 | 622.24  | 311.62 | 604.22  | 302.62 | E | 711.38  | 356.19 | 694.36  | 347.68 | 693.37  | 347.19 | 5 |
| 6 | 769.3   | 385.16 | 751.29  | 376.15 | F | 582.34  | 291.67 | 565.31  | 283.16 |         |        | 4 |
| 7 | 916.37  | 458.69 | 898.36  | 449.68 | F | 435.27  | 218.14 | 418.24  | 209.63 |         |        | 3 |
| 8 | 1029.46 | 515.23 | 1011.45 | 506.23 | L | 288.2   | 144.61 | 271.18  | 136.09 |         |        | 2 |
| 9 |         |        |         |        | R | 175.12  | 88.06  | 158.09  | 79.55  |         |        | 1 |

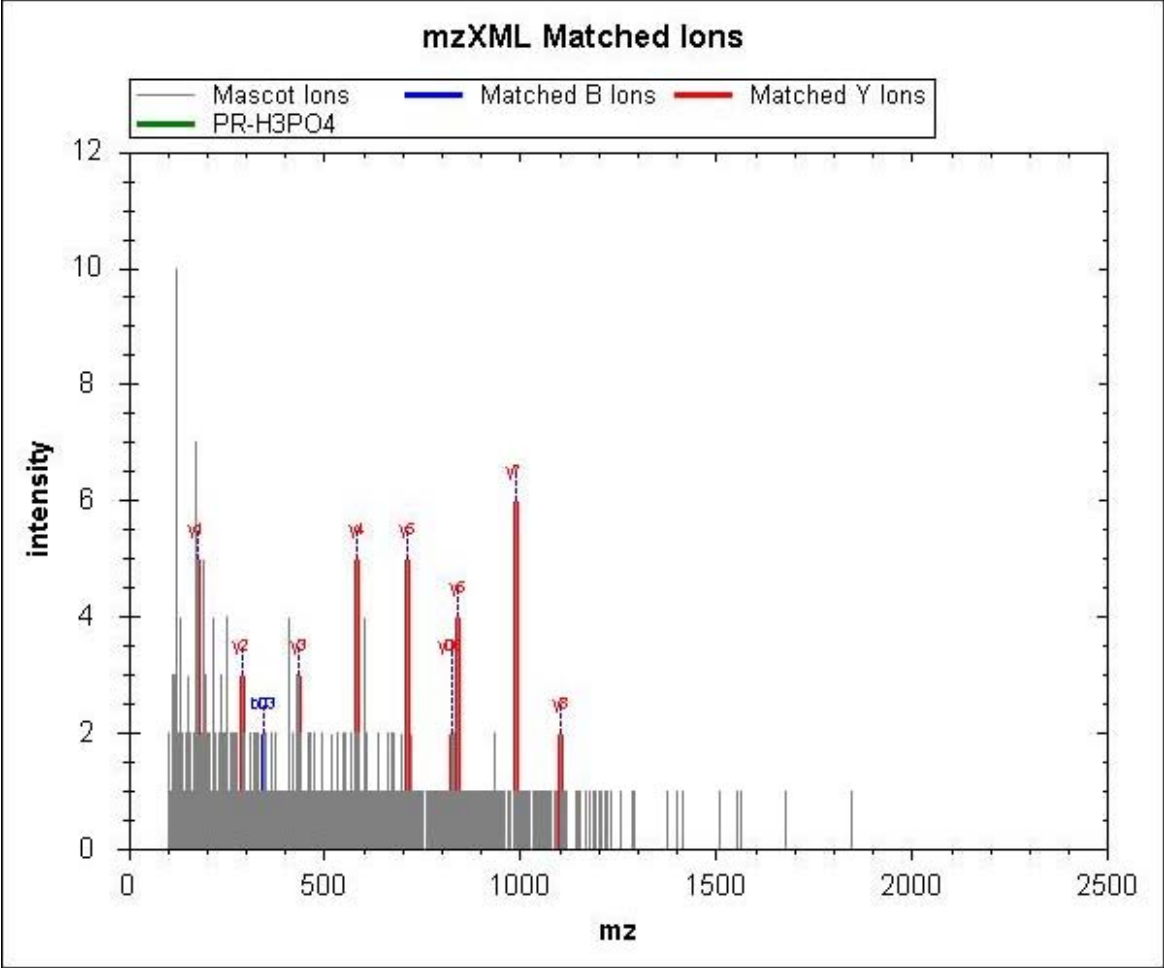

Protein index=1170, ACC No:IPI00329321

Peptide index=4181 MS/MS spectrum

Sequence: IGSDVELLLR, m/z:557.8223, charge:+ 2, Modification: , Mod Position:

Score: 60, Raw data:WET\_B5\_090616\_03.mzxml, MS/MS Elution time: 59.90434, Scan number:3270, Mass delta:-0.0014, Rank:1

| No | b      | b++    | b0     | b0++   | Seq | y       | y++    | y*     | y*++   | y0     | y0++   | RevNo |
|----|--------|--------|--------|--------|-----|---------|--------|--------|--------|--------|--------|-------|
| 1  | 114.09 | 57.55  |        |        | I   |         |        |        |        |        |        | 10    |
| 2  | 171.11 | 86.06  |        |        | G   | 1001.56 | 501.28 | 984.54 | 492.77 | 983.55 | 492.28 | 9     |
| 3  | 258.14 | 129.58 | 240.13 | 120.57 | S   | 944.54  | 472.77 | 927.51 | 464.26 | 926.53 | 463.77 | 8     |

|    |        |        |        |        |   |        |        |        |        |        |        |   |
|----|--------|--------|--------|--------|---|--------|--------|--------|--------|--------|--------|---|
| 4  | 373.17 | 187.09 | 355.16 | 178.08 | D | 857.51 | 429.26 | 840.48 | 420.74 | 839.5  | 420.25 | 7 |
| 5  | 472.24 | 236.62 | 454.23 | 227.62 | V | 742.48 | 371.74 | 725.46 | 363.23 | 724.47 | 362.74 | 6 |
| 6  | 601.28 | 301.15 | 583.27 | 292.14 | E | 643.41 | 322.21 | 626.39 | 313.7  | 625.4  | 313.21 | 5 |
| 7  | 714.37 | 357.69 | 696.36 | 348.68 | L | 514.37 | 257.69 | 497.34 | 249.18 |        |        | 4 |
| 8  | 827.45 | 414.23 | 809.44 | 405.22 | L | 401.29 | 201.15 | 384.26 | 192.63 |        |        | 3 |
| 9  | 940.53 | 470.77 | 922.52 | 461.77 | L | 288.2  | 144.61 | 271.18 | 136.09 |        |        | 2 |
| 10 |        |        |        |        | R | 175.12 | 88.06  | 158.09 | 79.55  |        |        | 1 |

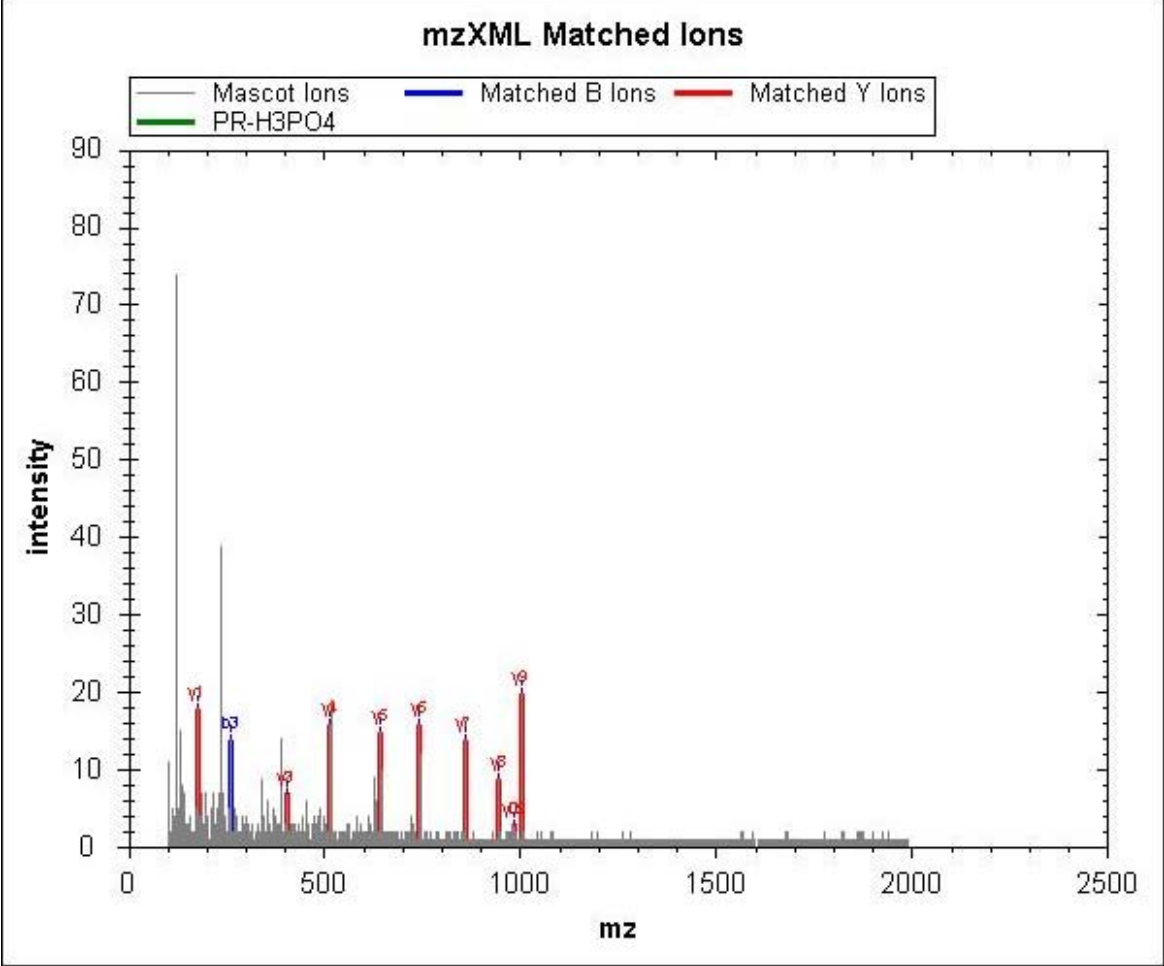

Protein index=1171, ACC No: IPI00220648

Peptide index=6430 MS/MS spectrum

Sequence: LEEQLENLIEFIR, m/z:823.4455, charge:+ 2, Modification: , Mod Position:

Score: 73.38, Raw data:WET\_A5\_090615\_02.mzxml, MS/MS Elution time: 87.978, Scan number:4908, Mass delta:-0.0014, Rank:1

| No | b      | b++    | b*     | b*++   | b0     | b0++   | Seq | y       | y++    | y*      | y*++   | y0      | y0++   | RevNo |
|----|--------|--------|--------|--------|--------|--------|-----|---------|--------|---------|--------|---------|--------|-------|
| 1  | 114.09 | 57.55  |        |        |        |        | L   |         |        |         |        |         |        | 13    |
| 2  | 243.13 | 122.07 |        |        | 225.12 | 113.07 | E   | 1532.8  | 766.9  | 1515.77 | 758.39 | 1514.78 | 757.9  | 12    |
| 3  | 372.18 | 186.59 |        |        | 354.17 | 177.59 | E   | 1403.75 | 702.38 | 1386.73 | 693.87 | 1385.74 | 693.37 | 11    |
| 4  | 500.24 | 250.62 | 483.21 | 242.11 | 482.22 | 241.62 | Q   | 1274.71 | 637.86 | 1257.68 | 629.35 | 1256.7  | 628.85 | 10    |
| 5  | 613.32 | 307.16 | 596.29 | 298.65 | 595.31 | 298.16 | L   | 1146.65 | 573.83 | 1129.63 | 565.32 | 1128.64 | 564.82 | 9     |

|    |         |        |         |        |         |        |   |         |        |         |        |         |        |   |
|----|---------|--------|---------|--------|---------|--------|---|---------|--------|---------|--------|---------|--------|---|
| 6  | 742.36  | 371.68 | 725.34  | 363.17 | 724.35  | 362.68 | E | 1033.57 | 517.29 | 1016.54 | 508.77 | 1015.56 | 508.28 | 8 |
| 7  | 856.4   | 428.71 | 839.38  | 420.19 | 838.39  | 419.7  | N | 904.53  | 452.77 | 887.5   | 444.25 | 886.51  | 443.76 | 7 |
| 8  | 969.49  | 485.25 | 952.46  | 476.73 | 951.48  | 476.24 | L | 790.48  | 395.74 | 773.46  | 387.23 | 772.47  | 386.74 | 6 |
| 9  | 1082.57 | 541.79 | 1065.55 | 533.28 | 1064.56 | 532.78 | I | 677.4   | 339.2  | 660.37  | 330.69 | 659.39  | 330.2  | 5 |
| 10 | 1211.62 | 606.31 | 1194.59 | 597.8  | 1193.6  | 597.31 | E | 564.31  | 282.66 | 547.29  | 274.15 | 546.3   | 273.66 | 4 |
| 11 | 1358.68 | 679.85 | 1341.66 | 671.33 | 1340.67 | 670.84 | F | 435.27  | 218.14 | 418.24  | 209.63 |         |        | 3 |
| 12 | 1471.77 | 736.39 | 1454.74 | 727.87 | 1453.76 | 727.38 | I | 288.2   | 144.61 | 271.18  | 136.09 |         |        | 2 |
| 13 |         |        |         |        |         |        | R | 175.12  | 88.06  | 158.09  | 79.55  |         |        | 1 |

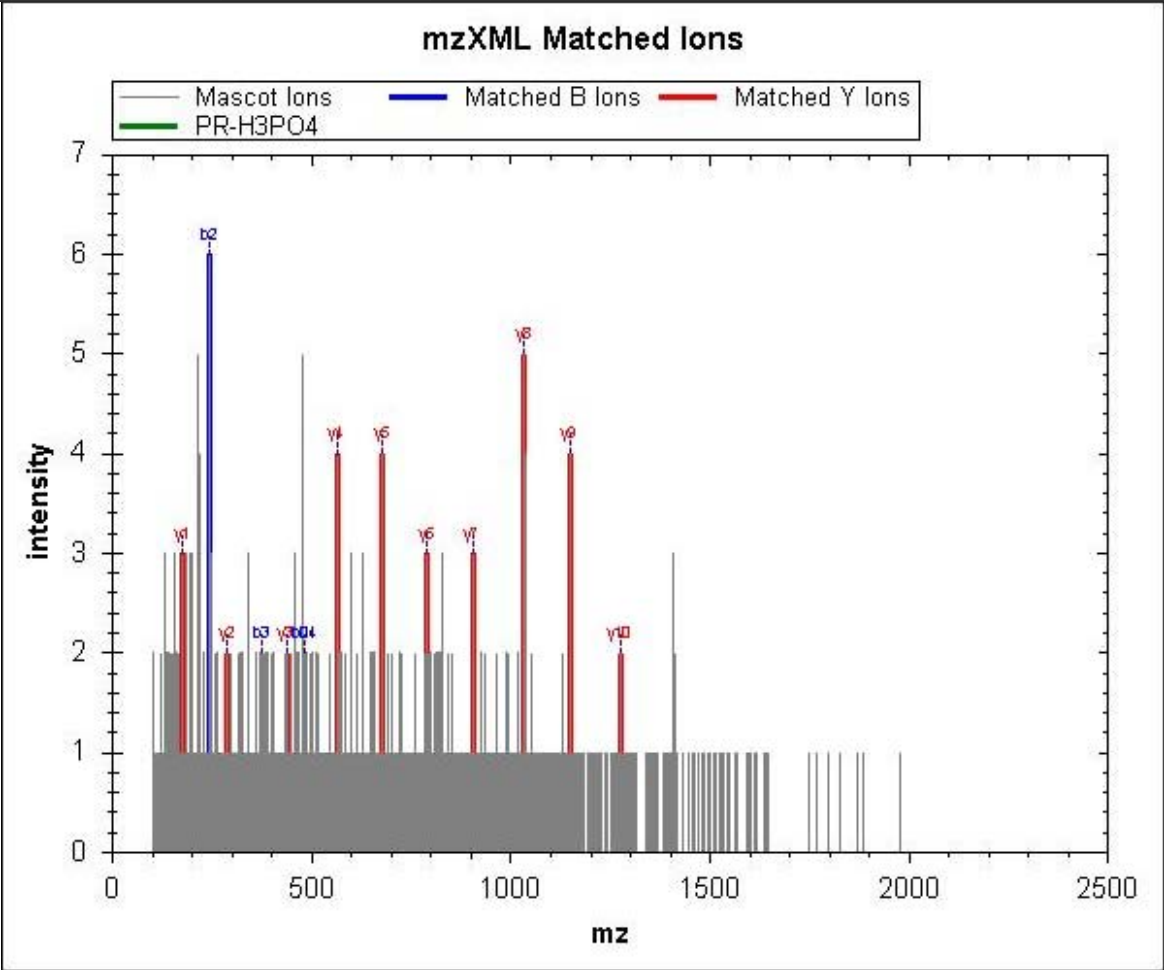

Protein index=1172, ACC No:IP100016670

Peptide index=4865 MS/MS spectrum

Sequence: TDEQALLSSILAK, m/z:694.8839, charge:+ 2, Modification: , Mod Position:

Score: 84.99, Raw data:WET\_B5\_090616\_03.mzxml, MS/MS Elution time: 66.59817, Scan number:3662, Mass delta:-0.0109, Rank:1

| No | b      | b++    | b*     | b*++   | b0     | b0++   | Seq | y       | y++    | y*      | y*++   | y0      | y0++   | RevNo |
|----|--------|--------|--------|--------|--------|--------|-----|---------|--------|---------|--------|---------|--------|-------|
| 1  | 102.05 | 51.53  |        |        | 84.04  | 42.53  | T   |         |        |         |        |         |        | 13    |
| 2  | 217.08 | 109.04 |        |        | 199.07 | 100.04 | D   | 1287.72 | 644.36 | 1270.69 | 635.85 | 1269.7  | 635.36 | 12    |
| 3  | 346.12 | 173.57 |        |        | 328.11 | 164.56 | E   | 1172.69 | 586.85 | 1155.66 | 578.33 | 1154.68 | 577.84 | 11    |
| 4  | 474.18 | 237.6  | 457.16 | 229.08 | 456.17 | 228.59 | Q   | 1043.65 | 522.33 | 1026.62 | 513.81 | 1025.64 | 513.32 | 10    |



|    |         |        |         |        |         |        |   |        |        |        |        |        |        |   |
|----|---------|--------|---------|--------|---------|--------|---|--------|--------|--------|--------|--------|--------|---|
| 4  | 489.25  | 245.13 |         |        |         |        | I | 912.53 | 456.77 | 895.5  | 448.25 | 894.52 | 447.76 | 8 |
| 5  | 588.32  | 294.66 |         |        |         |        | V | 799.44 | 400.22 | 782.42 | 391.71 | 781.43 | 391.22 | 7 |
| 6  | 702.36  | 351.69 | 685.34  | 343.17 |         |        | N | 700.37 | 350.69 | 683.35 | 342.18 | 682.36 | 341.69 | 6 |
| 7  | 803.41  | 402.21 | 786.39  | 393.7  | 785.4   | 393.2  | T | 586.33 | 293.67 | 569.3  | 285.16 | 568.32 | 284.66 | 5 |
| 8  | 917.45  | 459.23 | 900.43  | 450.72 | 899.44  | 450.23 | N | 485.28 | 243.15 | 468.26 | 234.63 |        |        | 4 |
| 9  | 1016.52 | 508.77 | 999.5   | 500.25 | 998.51  | 499.76 | V | 371.24 | 186.12 | 354.21 | 177.61 |        |        | 3 |
| 10 | 1113.58 | 557.29 | 1096.55 | 548.78 | 1095.57 | 548.29 | P | 272.17 | 136.59 | 255.15 | 128.08 |        |        | 2 |
| 11 |         |        |         |        |         |        | R | 175.12 | 88.06  | 158.09 | 79.55  |        |        | 1 |

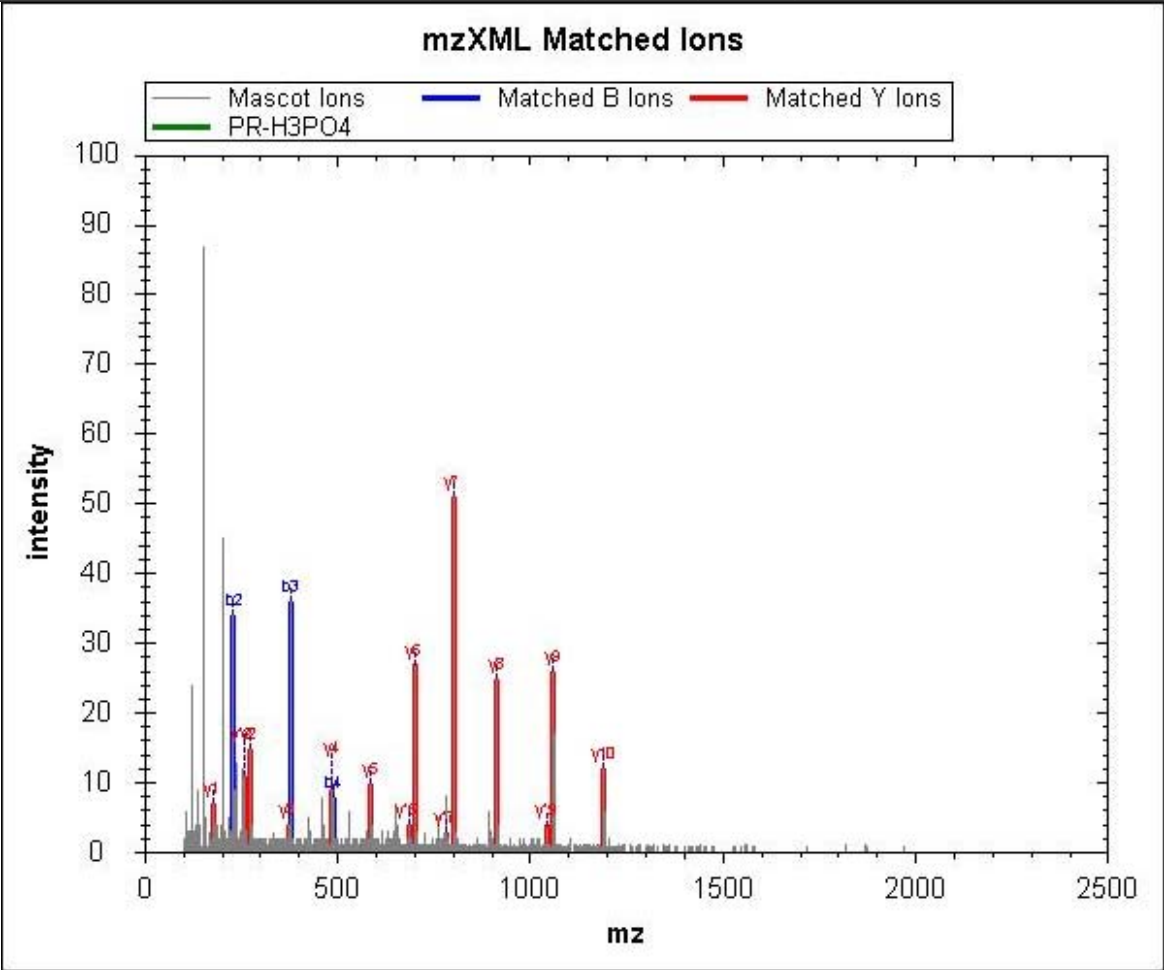

Protein index=1174, ACC No:IPI00025725

Peptide index=2434 MS/MS spectrum

Sequence: ELQPSEEVTK, m/z:673.3317, charge:+ 2, Modification: , Mod Position:

Score: 36.82, Raw data:WET\_A5\_090615\_03.mzxml, MS/MS Elution time: 44.11916, Scan number:2342, Mass delta:-0.0072, Rank:1

| No | b      | b++    | b*     | b*++   | b0     | b0++   | Seq | y       | y++    | y*      | y*++   | y0      | y0++   | RevNo |
|----|--------|--------|--------|--------|--------|--------|-----|---------|--------|---------|--------|---------|--------|-------|
| 1  | 130.05 | 65.53  |        |        | 112.04 | 56.52  | E   |         |        |         |        |         |        | 11    |
| 2  | 243.13 | 122.07 |        |        | 225.12 | 113.07 | L   | 1216.62 | 608.81 | 1199.59 | 600.3  | 1198.61 | 599.81 | 10    |
| 3  | 371.19 | 186.1  | 354.17 | 177.59 | 353.18 | 177.09 | Q   | 1103.54 | 552.27 | 1086.51 | 543.76 | 1085.53 | 543.27 | 9     |
| 4  | 468.25 | 234.63 | 451.22 | 226.11 | 450.23 | 225.62 | P   | 975.48  | 488.24 | 958.45  | 479.73 | 957.47  | 479.24 | 8     |

|    |         |        |         |        |         |        |   |        |        |        |        |        |        |   |
|----|---------|--------|---------|--------|---------|--------|---|--------|--------|--------|--------|--------|--------|---|
| 5  | 555.28  | 278.14 | 538.25  | 269.63 | 537.27  | 269.14 | S | 878.43 | 439.72 | 861.4  | 431.2  | 860.41 | 430.71 | 7 |
| 6  | 684.32  | 342.66 | 667.29  | 334.15 | 666.31  | 333.66 | E | 791.39 | 396.2  | 774.37 | 387.69 | 773.38 | 387.2  | 6 |
| 7  | 813.36  | 407.18 | 796.34  | 398.67 | 795.35  | 398.18 | E | 662.35 | 331.68 | 645.32 | 323.17 | 644.34 | 322.67 | 5 |
| 8  | 912.43  | 456.72 | 895.4   | 448.21 | 894.42  | 447.71 | V | 533.31 | 267.16 | 516.28 | 258.64 | 515.3  | 258.15 | 4 |
| 9  | 1013.48 | 507.24 | 996.45  | 498.73 | 995.47  | 498.24 | T | 434.24 | 217.62 | 417.21 | 209.11 | 416.23 | 208.62 | 3 |
| 10 | 1199.56 | 600.28 | 1182.53 | 591.77 | 1181.55 | 591.28 | W | 333.19 | 167.1  | 316.17 | 158.59 |        |        | 2 |
| 11 |         |        |         |        |         |        | K | 147.11 | 74.06  | 130.09 | 65.55  |        |        | 1 |

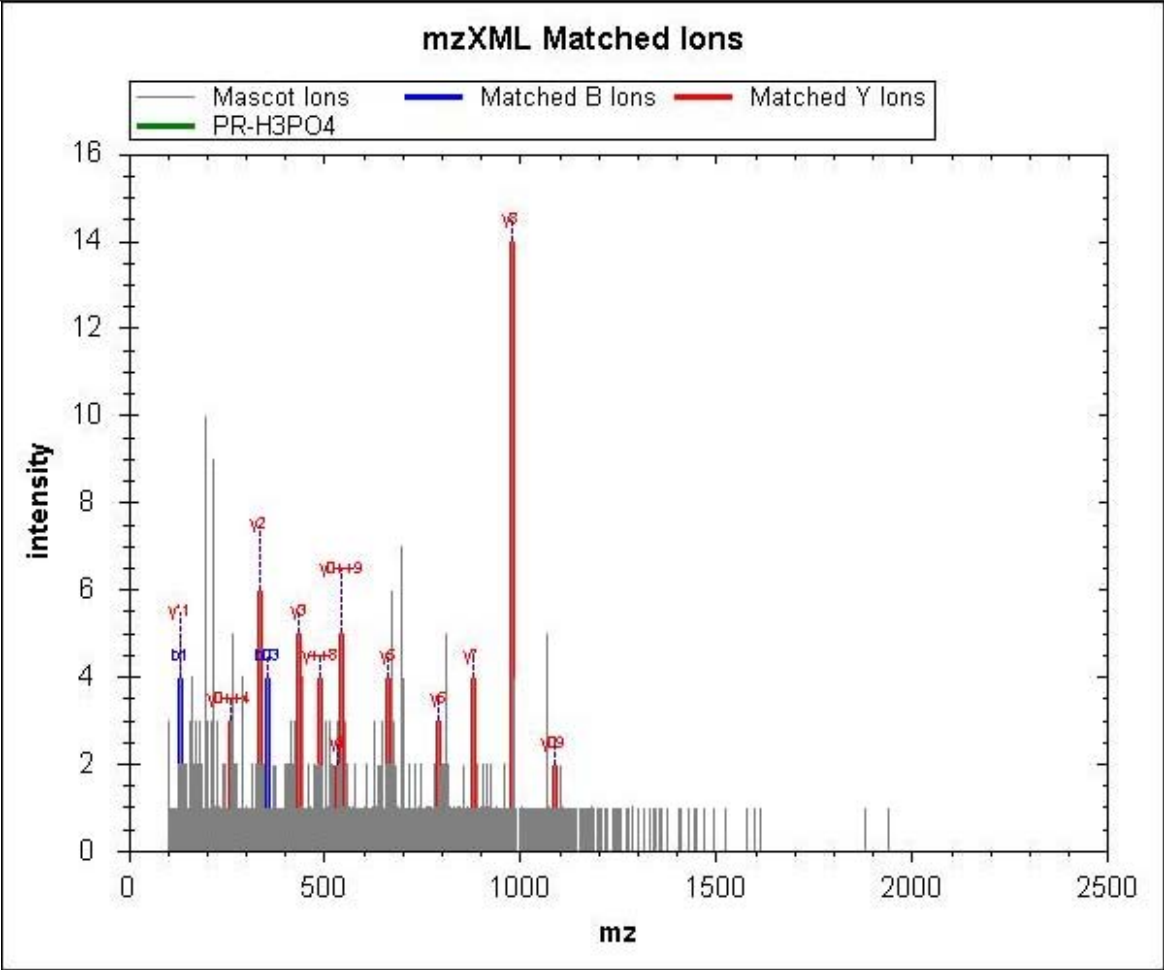

Protein index=1175, ACC No: IPI00220835

Peptide index=1501 MS/MS spectrum

Sequence: FYTEDSPGLK, m/z: 578.7808, charge: + 2, Modification: , Mod Position:

Score: 60.54, Raw data: WET\_B5\_090616\_02.mzxml, MS/MS Elution time: 34.4175, Scan number: 1783, Mass delta: 0.0009, Rank: 1

| No | b      | b++    | b0     | b0++   | Seq | y       | y++    | y*     | y*++   | y0     | y0++   | RevNo |
|----|--------|--------|--------|--------|-----|---------|--------|--------|--------|--------|--------|-------|
| 1  | 148.08 | 74.54  |        |        | F   |         |        |        |        |        |        | 10    |
| 2  | 311.14 | 156.07 |        |        | Y   | 1009.48 | 505.25 | 992.46 | 496.73 | 991.47 | 496.24 | 9     |
| 3  | 412.19 | 206.6  | 394.18 | 197.59 | T   | 846.42  | 423.71 | 829.39 | 415.2  | 828.41 | 414.71 | 8     |
| 4  | 541.23 | 271.12 | 523.22 | 262.11 | E   | 745.37  | 373.19 | 728.35 | 364.68 | 727.36 | 364.18 | 7     |
| 5  | 656.26 | 328.63 | 638.25 | 319.63 | D   | 616.33  | 308.67 | 599.3  | 300.16 | 598.32 | 299.66 | 6     |

|    |         |        |        |        |   |        |        |        |        |        |        |   |
|----|---------|--------|--------|--------|---|--------|--------|--------|--------|--------|--------|---|
| 6  | 743.29  | 372.15 | 725.28 | 363.14 | S | 501.3  | 251.16 | 484.28 | 242.64 | 483.29 | 242.15 | 5 |
| 7  | 840.34  | 420.67 | 822.33 | 411.67 | P | 414.27 | 207.64 | 397.24 | 199.13 |        |        | 4 |
| 8  | 897.36  | 449.18 | 879.35 | 440.18 | G | 317.22 | 159.11 | 300.19 | 150.6  |        |        | 3 |
| 9  | 1010.45 | 505.73 | 992.44 | 496.72 | L | 260.2  | 130.6  | 243.17 | 122.09 |        |        | 2 |
| 10 |         |        |        |        | K | 147.11 | 74.06  | 130.09 | 65.55  |        |        | 1 |

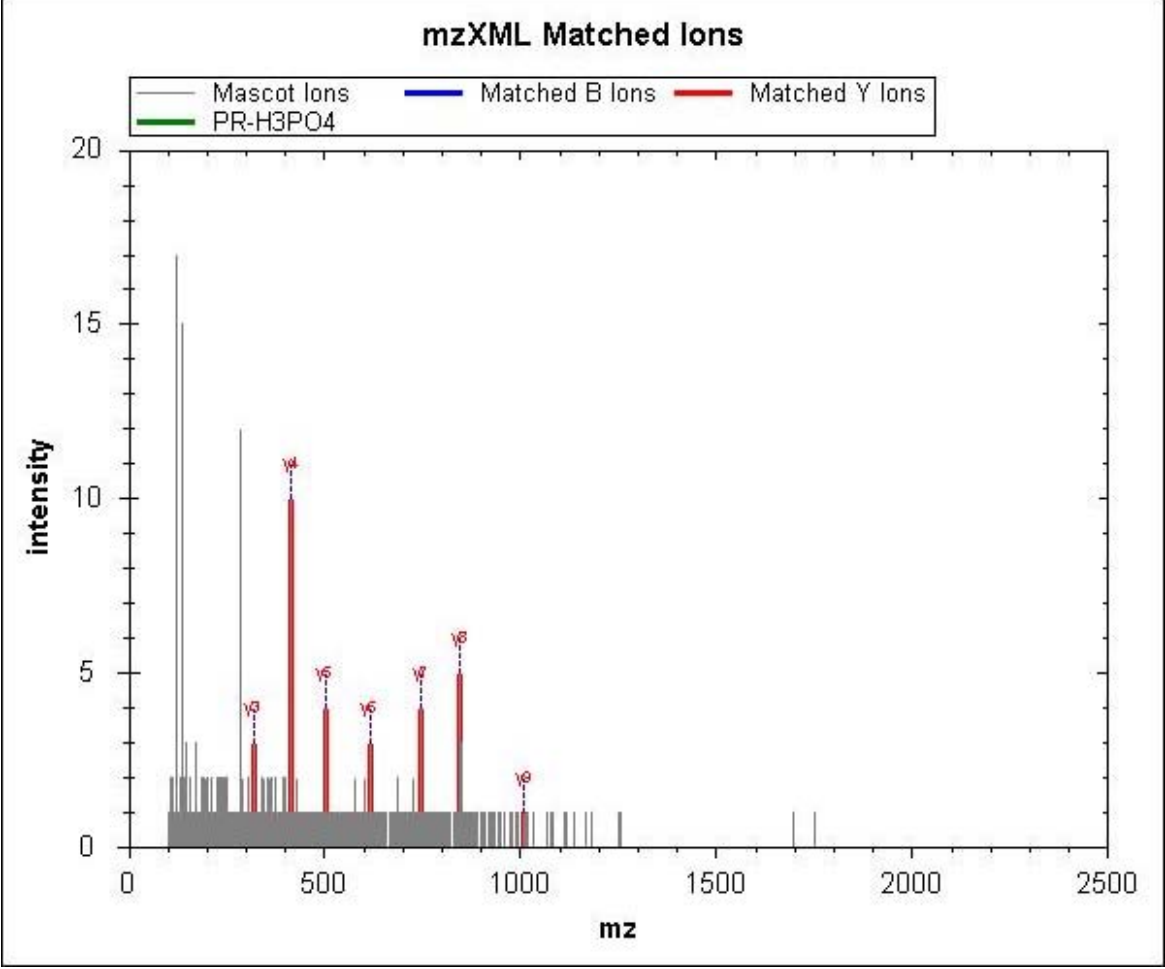

[illegible]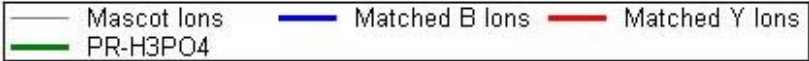

Peptide index=248 MS/MS spectrum

Sequence: ADTQTYQPYNK, m/z:664.808, charge:+ 2, Modification: , Mod Position:

Score: 42.24, Raw data:WET\_A5\_090615\_03.mzxml, MS/MS Elution time: 17.32117, Scan number:771,  
Mass delta:-0.0029, Rank:1

[illegible]

|    |         |        |         |        |         |        |   |        |        |        |        |  |  |   |
|----|---------|--------|---------|--------|---------|--------|---|--------|--------|--------|--------|--|--|---|
| 7  | 808.35  | 404.68 | 791.32  | 396.16 | 790.34  | 395.67 | Q | 649.33 | 325.17 | 632.3  | 316.66 |  |  | 5 |
| 8  | 905.4   | 453.2  | 888.37  | 444.69 | 887.39  | 444.2  | P | 521.27 | 261.14 | 504.25 | 252.63 |  |  | 4 |
| 9  | 1068.46 | 534.74 | 1051.44 | 526.22 | 1050.45 | 525.73 | Y | 424.22 | 212.61 | 407.19 | 204.1  |  |  | 3 |
| 10 | 1182.51 | 591.76 | 1165.48 | 583.24 | 1164.5  | 582.75 | N | 261.16 | 131.08 | 244.13 | 122.57 |  |  | 2 |
| 11 |         |        |         |        |         |        | K | 147.11 | 74.06  | 130.09 | 65.55  |  |  | 1 |

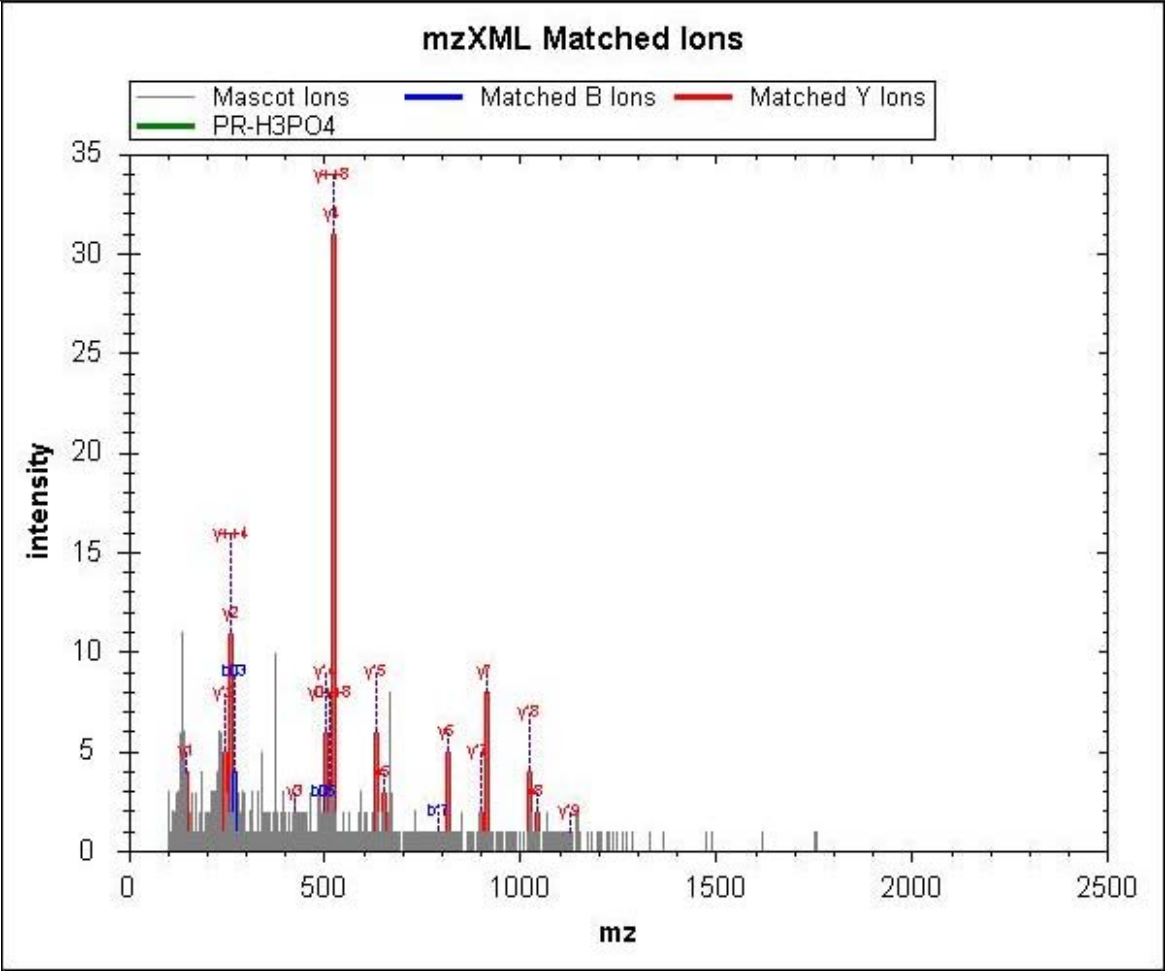

Protein index=1181, ACC No:IPI00022403

Peptide index=1071 MS/MS spectrum

Sequence: VYSSHTGYPPGGR, m/z:476.5569, charge:+ 3, Modification: , Mod Position:

Score: 55.54, Raw data:WET\_A5\_090615\_02.mzxml, MS/MS Elution time: 28.7705, Scan number:1441, Mass delta:-0.0124, Rank:1

[illegible]

|    |         |        |         |        |   |        |        |        |        |  |  |   |
|----|---------|--------|---------|--------|---|--------|--------|--------|--------|--|--|---|
| 8  | 895.39  | 448.2  | 877.38  | 439.2  | Y | 696.35 | 348.68 | 679.32 | 340.16 |  |  | 6 |
| 9  | 992.45  | 496.73 | 974.44  | 487.72 | P | 533.28 | 267.15 | 516.26 | 258.63 |  |  | 5 |
| 10 | 1049.47 | 525.24 | 1031.46 | 516.23 | G | 436.23 | 218.62 | 419.2  | 210.11 |  |  | 4 |
| 11 | 1106.49 | 553.75 | 1088.48 | 544.74 | G | 379.21 | 190.11 | 362.18 | 181.59 |  |  | 3 |
| 12 | 1253.56 | 627.28 | 1235.55 | 618.28 | F | 322.19 | 161.6  | 305.16 | 153.08 |  |  | 2 |
| 13 |         |        |         |        | R | 175.12 | 88.06  | 158.09 | 79.55  |  |  | 1 |

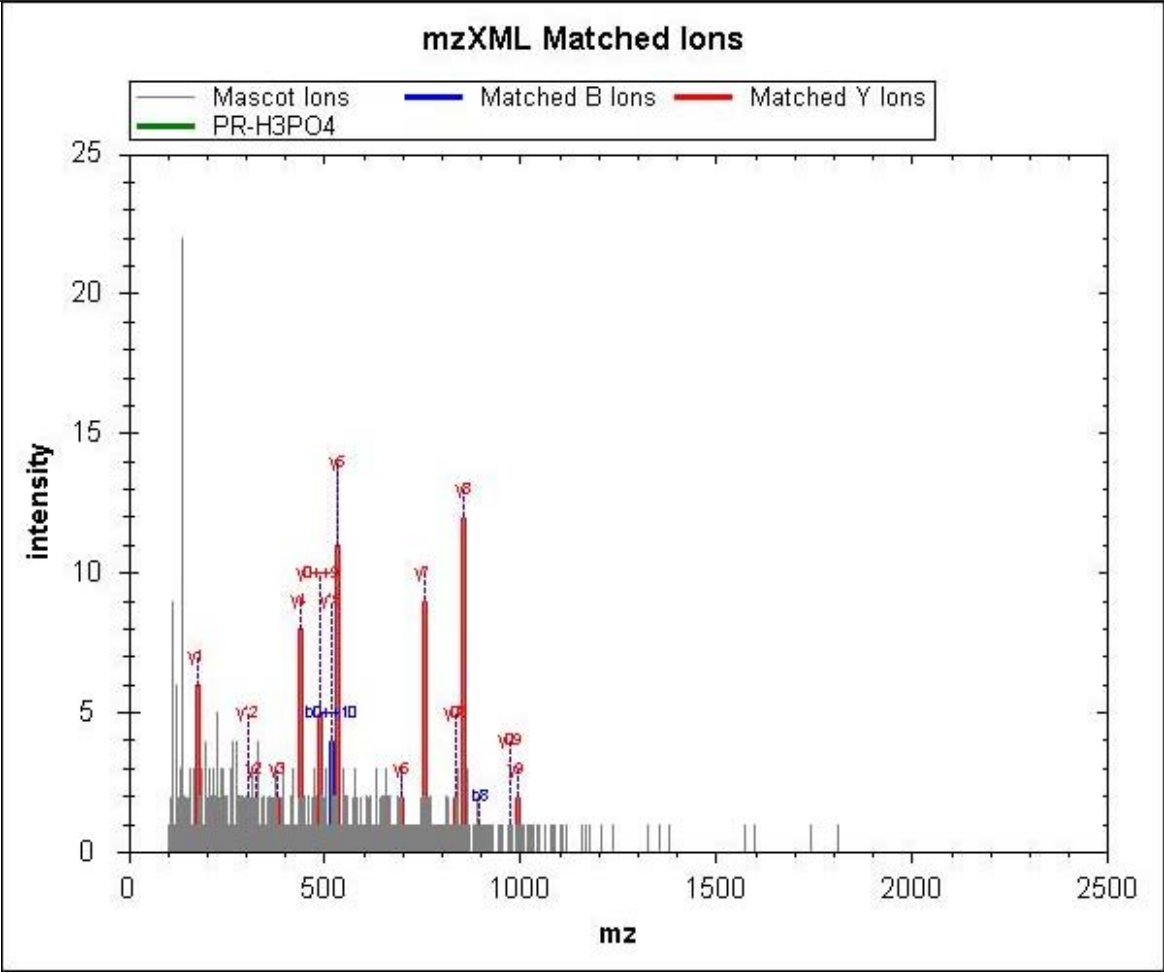

Protein index=1182, ACC No:IP100334579

Peptide index=2705 MS/MS spectrum

Sequence: SVEEISTLVQK, m/z:616.8395, charge:+ 2, Modification: , Mod Position:

Score: 60.64, Raw data:WET\_A5\_090615\_01.mzxml, MS/MS Elution time: 46.45766, Scan number:2484, Mass delta:-0.0016, Rank:1

| No | b      | b++    | b* | b*++ | b0     | b0++   | Seq | y       | y++    | y*      | y*++   | y0      | y0++   | RevNo |
|----|--------|--------|----|------|--------|--------|-----|---------|--------|---------|--------|---------|--------|-------|
| 1  | 88.04  | 44.52  |    |      | 70.03  | 35.52  | S   |         |        |         |        |         |        | 11    |
| 2  | 187.11 | 94.06  |    |      | 169.1  | 85.05  | V   | 1145.64 | 573.32 | 1128.61 | 564.81 | 1127.63 | 564.32 | 10    |
| 3  | 316.15 | 158.58 |    |      | 298.14 | 149.57 | E   | 1046.57 | 523.79 | 1029.55 | 515.28 | 1028.56 | 514.78 | 9     |
| 4  | 445.19 | 223.1  |    |      | 427.18 | 214.09 | E   | 917.53  | 459.27 | 900.5   | 450.76 | 899.52  | 450.26 | 8     |
| 5  | 558.28 | 279.64 |    |      | 540.27 | 270.64 | I   | 788.49  | 394.75 | 771.46  | 386.23 | 770.48  | 385.74 | 7     |
| 6  | 645.31 | 323.16 |    |      | 627.3  | 314.15 | S   | 675.4   | 338.21 | 658.38  | 329.69 | 657.39  | 329.2  | 6     |

|    |         |        |         |        |         |        |   |        |        |        |        |        |        |   |
|----|---------|--------|---------|--------|---------|--------|---|--------|--------|--------|--------|--------|--------|---|
| 7  | 746.36  | 373.68 |         |        | 728.35  | 364.68 | T | 588.37 | 294.69 | 571.34 | 286.18 | 570.36 | 285.68 | 5 |
| 8  | 859.44  | 430.22 |         |        | 841.43  | 421.22 | L | 487.32 | 244.17 | 470.3  | 235.65 |        |        | 4 |
| 9  | 958.51  | 479.76 |         |        | 940.5   | 470.75 | V | 374.24 | 187.62 | 357.21 | 179.11 |        |        | 3 |
| 10 | 1086.57 | 543.79 | 1069.54 | 535.27 | 1068.56 | 534.78 | Q | 275.17 | 138.09 | 258.14 | 129.58 |        |        | 2 |
| 11 |         |        |         |        |         |        | K | 147.11 | 74.06  | 130.09 | 65.55  |        |        | 1 |

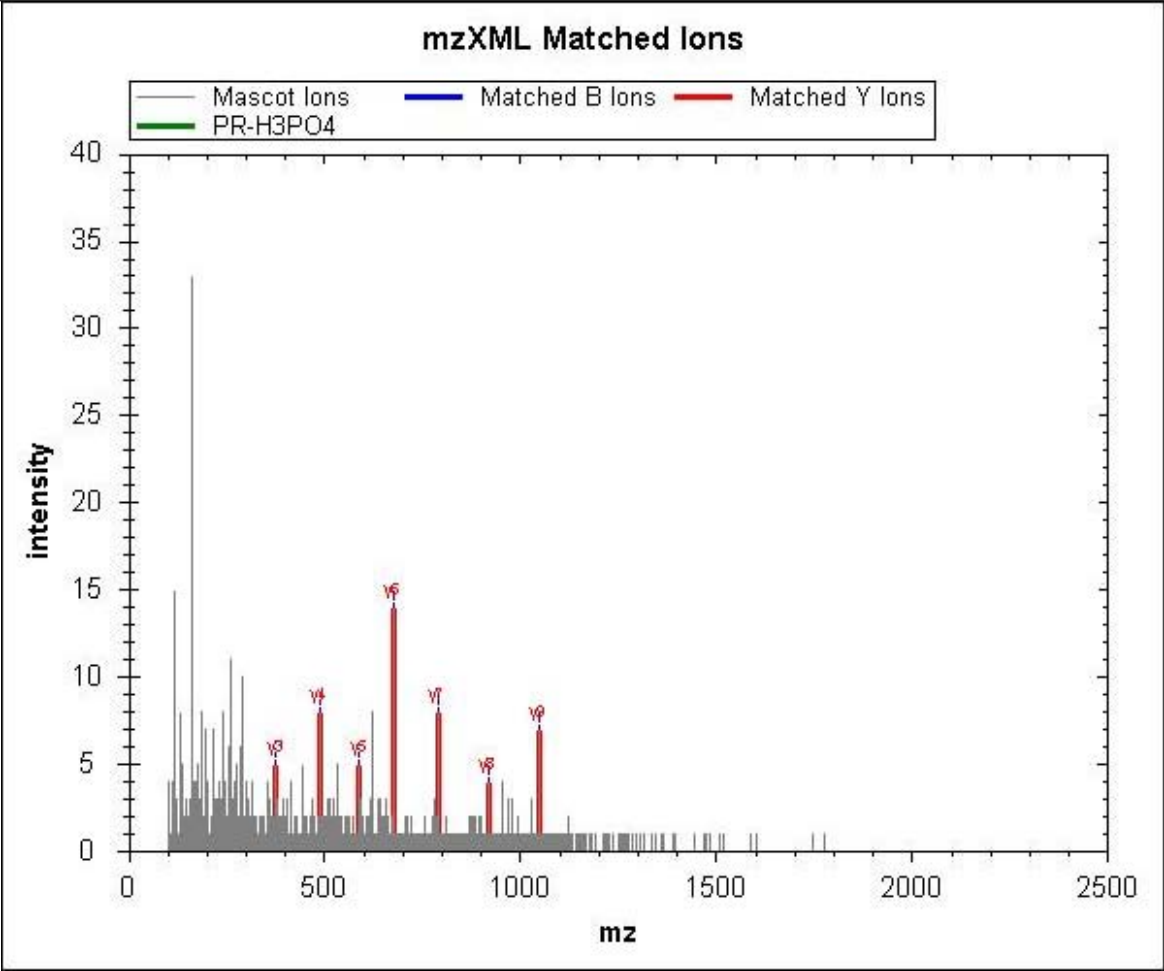

Protein index=1185, ACC No:IPI00178926

Peptide index=659 MS/MS spectrum

Sequence: SSEDPNEDIVER, m/z:695.3122, charge:+ 2, Modification: , Mod Position:

Score: 49.2, Raw data:WET\_A5\_090615\_03.mzxml, MS/MS Elution time: 21.862, Scan number:1035, Mass delta:0.001, Rank:1

| No | b      | b++    | b*     | b*++   | b0     | b0++   | Seq | y       | y++    | y*      | y*++   | y0      | y0++   | RevNo |
|----|--------|--------|--------|--------|--------|--------|-----|---------|--------|---------|--------|---------|--------|-------|
| 1  | 88.04  | 44.52  |        |        | 70.03  | 35.52  | S   |         |        |         |        |         |        | 12    |
| 2  | 175.07 | 88.04  |        |        | 157.06 | 79.03  | S   | 1302.58 | 651.79 | 1285.55 | 643.28 | 1284.57 | 642.79 | 11    |
| 3  | 304.11 | 152.56 |        |        | 286.1  | 143.56 | E   | 1215.55 | 608.28 | 1198.52 | 599.76 | 1197.54 | 599.27 | 10    |
| 4  | 419.14 | 210.07 |        |        | 401.13 | 201.07 | D   | 1086.51 | 543.76 | 1069.48 | 535.24 | 1068.5  | 534.75 | 9     |
| 5  | 516.19 | 258.6  |        |        | 498.18 | 249.6  | P   | 971.48  | 486.24 | 954.45  | 477.73 | 953.47  | 477.24 | 8     |
| 6  | 630.24 | 315.62 | 613.21 | 307.11 | 612.23 | 306.62 | N   | 874.43  | 437.72 | 857.4   | 429.2  | 856.42  | 428.71 | 7     |
| 7  | 759.28 | 380.14 | 742.25 | 371.63 | 741.27 | 371.14 | E   | 760.38  | 380.7  | 743.36  | 372.18 | 742.37  | 371.69 | 6     |

|    |         |        |         |        |         |        |   |        |        |        |        |        |        |   |
|----|---------|--------|---------|--------|---------|--------|---|--------|--------|--------|--------|--------|--------|---|
| 8  | 874.31  | 437.66 | 857.28  | 429.14 | 856.3   | 428.65 | D | 631.34 | 316.17 | 614.31 | 307.66 | 613.33 | 307.17 | 5 |
| 9  | 987.39  | 494.2  | 970.36  | 485.69 | 969.38  | 485.19 | I | 516.31 | 258.66 | 499.29 | 250.15 | 498.3  | 249.66 | 4 |
| 10 | 1086.46 | 543.73 | 1069.43 | 535.22 | 1068.45 | 534.73 | V | 403.23 | 202.12 | 386.2  | 193.61 | 385.22 | 193.11 | 3 |
| 11 | 1215.5  | 608.25 | 1198.47 | 599.74 | 1197.49 | 599.25 | E | 304.16 | 152.58 | 287.13 | 144.07 | 286.15 | 143.58 | 2 |
| 12 |         |        |         |        |         |        | R | 175.12 | 88.06  | 158.09 | 79.55  |        |        | 1 |

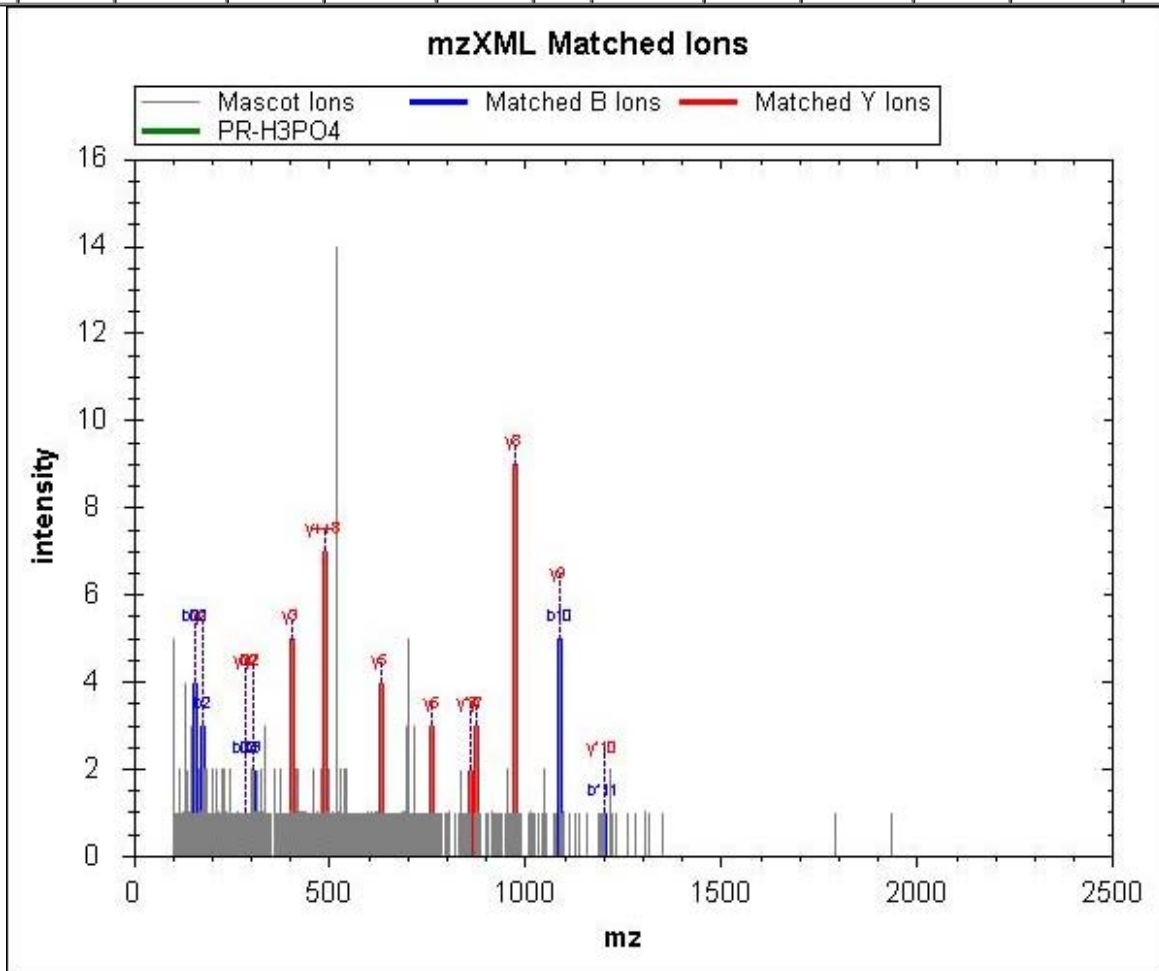

Protein index=1189, ACC No:IPI00399089

Peptide index=2998 MS/MS spectrum

Sequence: LLEQWEKDDIEEGDLPEHK, m/z:813.3816, charge:+ 3, Modification: , Mod Position:

Score: 34.64, Raw data:WET\_A5\_090615\_01.mzxml, MS/MS Elution time: 49.11, Scan number:2639, Mass delta:-0.0055, Rank:1

| No | b      | b++    | b*     | b*++   | b0     | b0++   | Seq | y       | y++     | y*      | y*++    | y0      | y0++    | RevNo |
|----|--------|--------|--------|--------|--------|--------|-----|---------|---------|---------|---------|---------|---------|-------|
| 1  | 114.09 | 57.55  |        |        |        |        | L   |         |         |         |         |         |         | 20    |
| 2  | 227.18 | 114.09 |        |        |        |        | L   | 2325.05 | 1163.03 | 2308.03 | 1154.52 | 2307.04 | 1154.02 | 19    |
| 3  | 356.22 | 178.61 |        |        | 338.21 | 169.61 | E   | 2211.97 | 1106.49 | 2194.94 | 1097.97 | 2193.96 | 1097.48 | 18    |
| 4  | 484.28 | 242.64 | 467.25 | 234.13 | 466.27 | 233.64 | Q   | 2082.93 | 1041.97 | 2065.9  | 1033.45 | 2064.91 | 1032.96 | 17    |
| 5  | 670.36 | 335.68 | 653.33 | 327.17 | 652.35 | 326.68 | W   | 1954.87 | 977.94  | 1937.84 | 969.42  | 1936.86 | 968.93  | 16    |
| 6  | 799.4  | 400.2  | 782.37 | 391.69 | 781.39 | 391.2  | E   | 1768.79 | 884.9   | 1751.76 | 876.38  | 1750.78 | 875.89  | 15    |
| 7  | 927.49 | 464.25 | 910.47 | 455.74 | 909.48 | 455.25 | K   | 1639.74 | 820.38  | 1622.72 | 811.86  | 1621.73 | 811.37  | 14    |

|    |         |         |         |         |         |         |   |         |        |         |        |         |        |    |
|----|---------|---------|---------|---------|---------|---------|---|---------|--------|---------|--------|---------|--------|----|
| 8  | 1042.52 | 521.76  | 1025.49 | 513.25  | 1024.51 | 512.76  | D | 1511.65 | 756.33 | 1494.62 | 747.82 | 1493.64 | 747.32 | 13 |
| 9  | 1157.55 | 579.28  | 1140.52 | 570.76  | 1139.54 | 570.27  | D | 1396.62 | 698.82 | 1379.6  | 690.3  | 1378.61 | 689.81 | 12 |
| 10 | 1272.57 | 636.79  | 1255.55 | 628.28  | 1254.56 | 627.79  | D | 1281.6  | 641.3  | 1264.57 | 632.79 | 1263.59 | 632.3  | 11 |
| 11 | 1385.66 | 693.33  | 1368.63 | 684.82  | 1367.65 | 684.33  | I | 1166.57 | 583.79 | 1149.54 | 575.27 | 1148.56 | 574.78 | 10 |
| 12 | 1514.7  | 757.85  | 1497.67 | 749.34  | 1496.69 | 748.85  | E | 1053.48 | 527.25 | 1036.46 | 518.73 | 1035.47 | 518.24 | 9  |
| 13 | 1643.74 | 822.38  | 1626.72 | 813.86  | 1625.73 | 813.37  | E | 924.44  | 462.72 | 907.42  | 454.21 | 906.43  | 453.72 | 8  |
| 14 | 1700.77 | 850.89  | 1683.74 | 842.37  | 1682.75 | 841.88  | G | 795.4   | 398.2  | 778.37  | 389.69 | 777.39  | 389.2  | 7  |
| 15 | 1815.79 | 908.4   | 1798.77 | 899.89  | 1797.78 | 899.39  | D | 738.38  | 369.69 | 721.35  | 361.18 | 720.37  | 360.69 | 6  |
| 16 | 1928.88 | 964.94  | 1911.85 | 956.43  | 1910.87 | 955.94  | L | 623.35  | 312.18 | 606.32  | 303.67 | 605.34  | 303.17 | 5  |
| 17 | 2025.93 | 1013.47 | 2008.9  | 1004.95 | 2007.92 | 1004.46 | P | 510.27  | 255.64 | 493.24  | 247.12 | 492.26  | 246.63 | 4  |
| 18 | 2154.97 | 1077.99 | 2137.95 | 1069.48 | 2136.96 | 1068.98 | E | 413.21  | 207.11 | 396.19  | 198.6  | 395.2   | 198.11 | 3  |
| 19 | 2292.03 | 1146.52 | 2275    | 1138.01 | 2274.02 | 1137.51 | H | 284.17  | 142.59 | 267.15  | 134.08 |         |        | 2  |
| 20 |         |         |         |         |         |         | K | 147.11  | 74.06  | 130.09  | 65.55  |         |        | 1  |

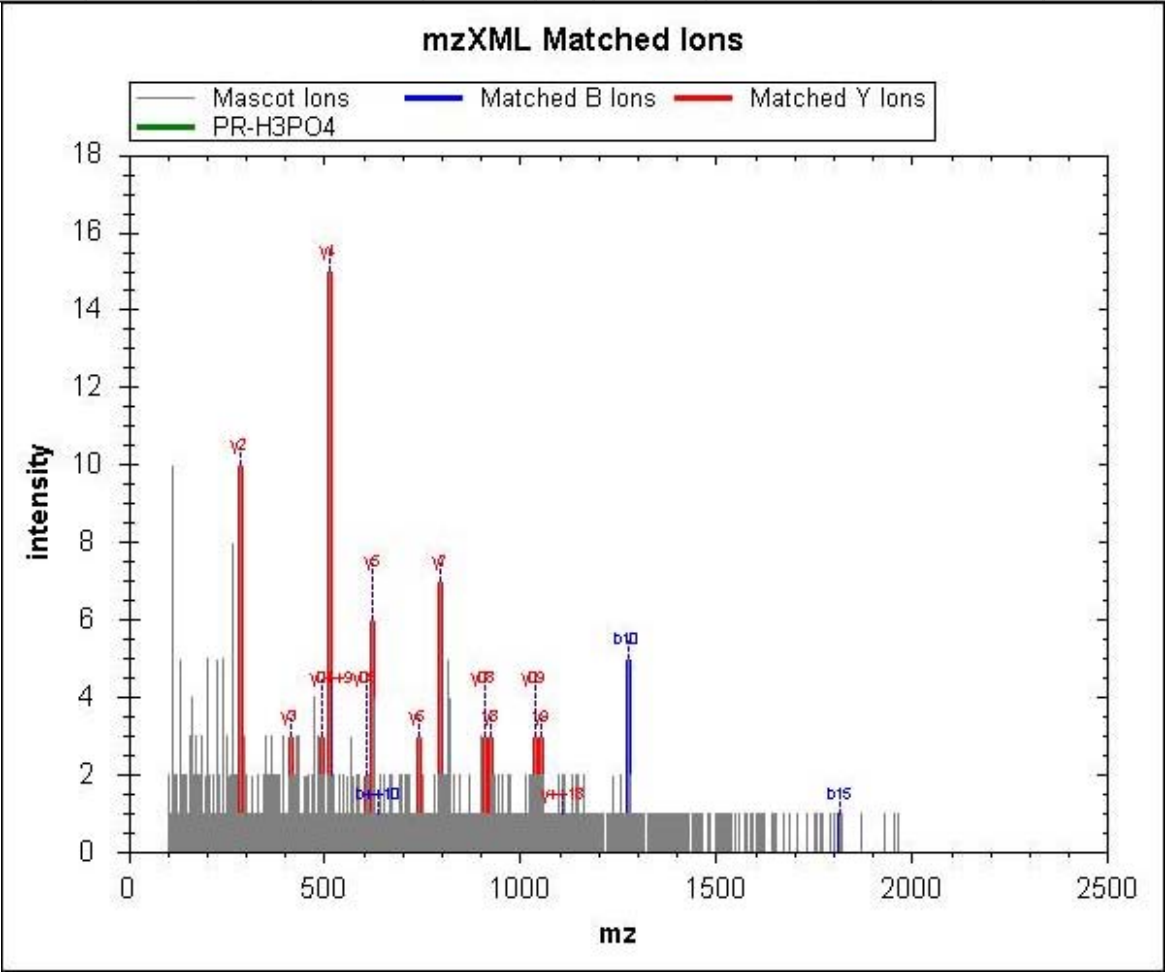

Protein index=1190, ACC No: IPI00219833

Peptide index=5145 MS/MS spectrum

Sequence: GKEDPWNSITSGALTGAVLAAR, m/z:738.7215, charge:+ 3, Modification: , Mod Position:

Score: 60.31, Raw data:WET\_A5\_090615\_01.mzxml, MS/MS Elution time: 69.80466, Scan number:3851, Mass delta:-0.0012, Rank:1

| No | b       | b++     | b*      | b*++    | b0      | b0++    | Seq | y       | y++     | y*      | y*++    | y0      | y0++    | RevNo |
|----|---------|---------|---------|---------|---------|---------|-----|---------|---------|---------|---------|---------|---------|-------|
| 1  | 58.03   | 29.52   |         |         |         |         | G   |         |         |         |         |         |         | 22    |
| 2  | 186.12  | 93.57   | 169.1   | 85.05   |         |         | K   | 2157.13 | 1079.07 | 2140.1  | 1070.56 | 2139.12 | 1070.06 | 21    |
| 3  | 315.17  | 158.09  | 298.14  | 149.57  | 297.16  | 149.08  | E   | 2029.04 | 1015.02 | 2012.01 | 1006.51 | 2011.02 | 1006.02 | 20    |
| 4  | 430.19  | 215.6   | 413.17  | 207.09  | 412.18  | 206.59  | D   | 1899.99 | 950.5   | 1882.97 | 941.99  | 1881.98 | 941.49  | 19    |
| 5  | 527.25  | 264.13  | 510.22  | 255.61  | 509.24  | 255.12  | P   | 1784.97 | 892.99  | 1767.94 | 884.47  | 1766.95 | 883.98  | 18    |
| 6  | 713.33  | 357.17  | 696.3   | 348.65  | 695.31  | 348.16  | W   | 1687.91 | 844.46  | 1670.89 | 835.95  | 1669.9  | 835.45  | 17    |
| 7  | 827.37  | 414.19  | 810.34  | 405.67  | 809.36  | 405.18  | N   | 1501.83 | 751.42  | 1484.81 | 742.91  | 1483.82 | 742.42  | 16    |
| 8  | 914.4   | 457.7   | 897.37  | 449.19  | 896.39  | 448.7   | S   | 1387.79 | 694.4   | 1370.76 | 685.89  | 1369.78 | 685.39  | 15    |
| 9  | 1027.48 | 514.25  | 1010.46 | 505.73  | 1009.47 | 505.24  | I   | 1300.76 | 650.88  | 1283.73 | 642.37  | 1282.75 | 641.88  | 14    |
| 10 | 1128.53 | 564.77  | 1111.51 | 556.26  | 1110.52 | 555.76  | T   | 1187.67 | 594.34  | 1170.65 | 585.83  | 1169.66 | 585.34  | 13    |
| 11 | 1215.56 | 608.29  | 1198.54 | 599.77  | 1197.55 | 599.28  | S   | 1086.63 | 543.82  | 1069.6  | 535.3   | 1068.62 | 534.81  | 12    |
| 12 | 1272.59 | 636.8   | 1255.56 | 628.28  | 1254.57 | 627.79  | G   | 999.59  | 500.3   | 982.57  | 491.79  | 981.58  | 491.3   | 11    |
| 13 | 1343.62 | 672.32  | 1326.6  | 663.8   | 1325.61 | 663.31  | A   | 942.57  | 471.79  | 925.55  | 463.28  | 924.56  | 462.78  | 10    |
| 14 | 1456.71 | 728.86  | 1439.68 | 720.34  | 1438.7  | 719.85  | L   | 871.54  | 436.27  | 854.51  | 427.76  | 853.53  | 427.27  | 9     |
| 15 | 1557.75 | 779.38  | 1540.73 | 770.87  | 1539.74 | 770.38  | T   | 758.45  | 379.73  | 741.43  | 371.22  | 740.44  | 370.72  | 8     |
| 16 | 1614.78 | 807.89  | 1597.75 | 799.38  | 1596.77 | 798.89  | G   | 657.4   | 329.21  | 640.38  | 320.69  |         |         | 7     |
| 17 | 1685.81 | 843.41  | 1668.79 | 834.9   | 1667.8  | 834.4   | A   | 600.38  | 300.7   | 583.36  | 292.18  |         |         | 6     |
| 18 | 1784.88 | 892.94  | 1767.85 | 884.43  | 1766.87 | 883.94  | V   | 529.35  | 265.18  | 512.32  | 256.66  |         |         | 5     |
| 19 | 1897.97 | 949.49  | 1880.94 | 940.97  | 1879.95 | 940.48  | L   | 430.28  | 215.64  | 413.25  | 207.13  |         |         | 4     |
| 20 | 1969    | 985.01  | 1951.98 | 976.49  | 1950.99 | 976     | A   | 317.19  | 159.1   | 300.17  | 150.59  |         |         | 3     |
| 21 | 2040.04 | 1020.52 | 2023.01 | 1012.01 | 2022.03 | 1011.52 | A   | 246.16  | 123.58  | 229.13  | 115.07  |         |         | 2     |
| 22 |         |         |         |         |         |         | R   | 175.12  | 88.06   | 158.09  | 79.55   |         |         | 1     |

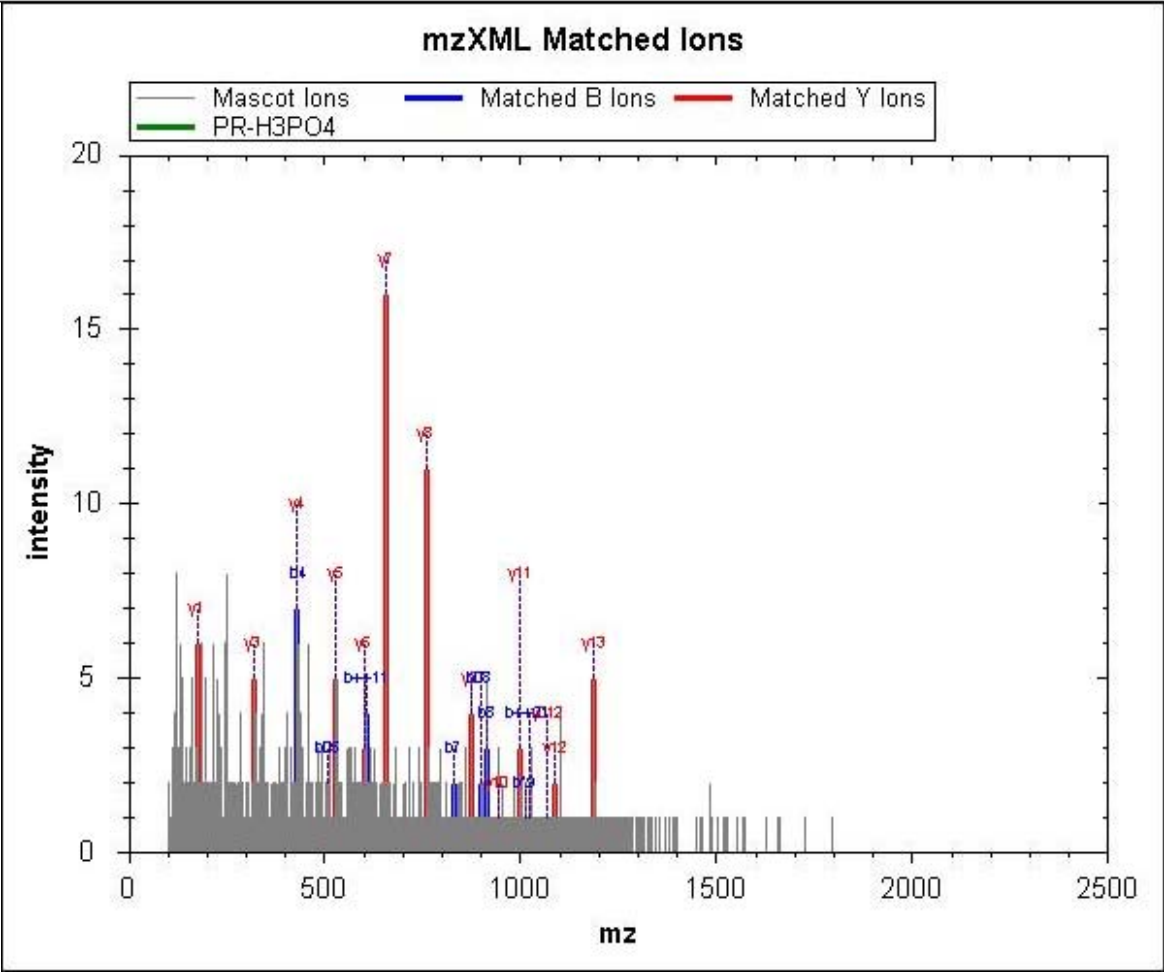

Protein index=1191, ACC No:IPI00013180

Peptide index=4904 MS/MS spectrum

Sequence: KVESLWPIFR, m/z:637.8665, charge:+ 2, Modification: , Mod Position:

Score: 83.16, Raw data:WET\_A5\_090615\_03.mzxml, MS/MS Elution time: 66.91617, Scan number:3677, Mass delta:-0.0001, Rank:1

| No | b       | b++    | b*      | b*++   | b0     | b0++   | Seq | y       | y++    | y*      | y*++   | y0      | y0++   | RevNo |
|----|---------|--------|---------|--------|--------|--------|-----|---------|--------|---------|--------|---------|--------|-------|
| 1  | 129.1   | 65.05  | 112.08  | 56.54  |        |        | K   |         |        |         |        |         |        | 10    |
| 2  | 228.17  | 114.59 | 211.14  | 106.08 |        |        | V   | 1146.63 | 573.82 | 1129.6  | 565.31 | 1128.62 | 564.81 | 9     |
| 3  | 357.21  | 179.11 | 340.19  | 170.6  | 339.2  | 170.1  | E   | 1047.56 | 524.28 | 1030.54 | 515.77 | 1029.55 | 515.28 | 8     |
| 4  | 444.25  | 222.63 | 427.22  | 214.11 | 426.23 | 213.62 | S   | 918.52  | 459.76 | 901.49  | 451.25 | 900.51  | 450.76 | 7     |
| 5  | 557.33  | 279.17 | 540.3   | 270.65 | 539.32 | 270.16 | L   | 831.49  | 416.25 | 814.46  | 407.73 |         |        | 6     |
| 6  | 743.41  | 372.21 | 726.38  | 363.69 | 725.4  | 363.2  | W   | 718.4   | 359.71 | 701.38  | 351.19 |         |        | 5     |
| 7  | 840.46  | 420.73 | 823.43  | 412.22 | 822.45 | 411.73 | P   | 532.32  | 266.67 | 515.3   | 258.15 |         |        | 4     |
| 8  | 953.55  | 477.28 | 936.52  | 468.76 | 935.53 | 468.27 | I   | 435.27  | 218.14 | 418.24  | 209.63 |         |        | 3     |
| 9  | 1100.61 | 550.81 | 1083.59 | 542.3  | 1082.6 | 541.81 | F   | 322.19  | 161.6  | 305.16  | 153.08 |         |        | 2     |
| 10 |         |        |         |        |        |        | R   | 175.12  | 88.06  | 158.09  | 79.55  |         |        | 1     |

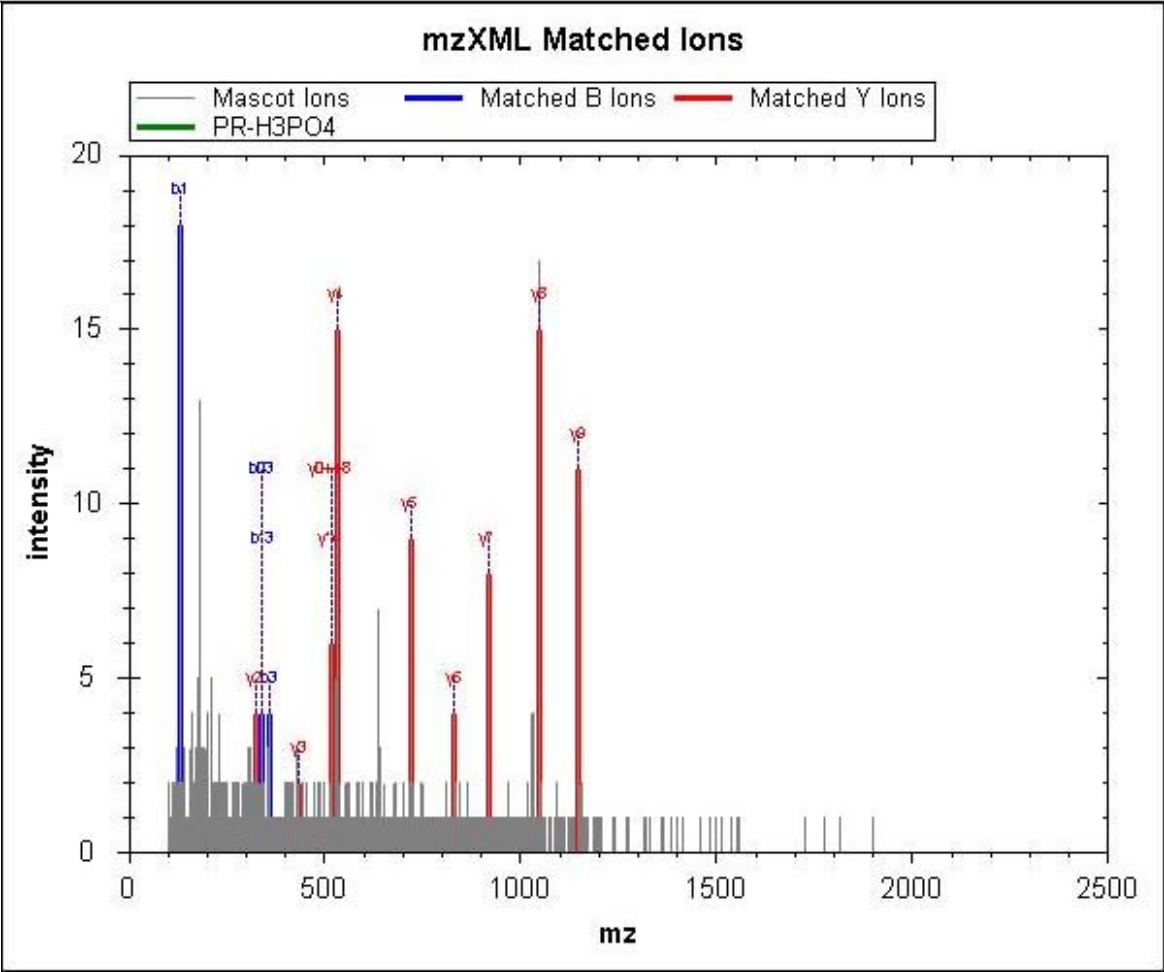

Protein index=1192, ACC No: IPI00294472

Peptide index=4947 MS/MS spectrum

Sequence: LEDILESINSIK, m/z:687.3805, charge:+ 2, Modification: , Mod Position:

Score: 68.6, Raw data:WET\_B5\_090616\_01.mzxml, MS/MS Elution time: 67.4695, Scan number:3692, Mass delta:-0.0032, Rank:1

| No | b       | b++    | b*      | b*++   | b0      | b0++   | Seq | y       | y++    | y*      | y*++   | y0      | y0++   | RevNo |
|----|---------|--------|---------|--------|---------|--------|-----|---------|--------|---------|--------|---------|--------|-------|
| 1  | 114.09  | 57.55  |         |        |         |        | L   |         |        |         |        |         |        | 12    |
| 2  | 243.13  | 122.07 |         |        | 225.12  | 113.07 | E   | 1260.67 | 630.84 | 1243.64 | 622.32 | 1242.66 | 621.83 | 11    |
| 3  | 358.16  | 179.58 |         |        | 340.15  | 170.58 | D   | 1131.63 | 566.32 | 1114.6  | 557.8  | 1113.61 | 557.31 | 10    |
| 4  | 471.24  | 236.13 |         |        | 453.23  | 227.12 | I   | 1016.6  | 508.8  | 999.57  | 500.29 | 998.59  | 499.8  | 9     |
| 5  | 584.33  | 292.67 |         |        | 566.32  | 283.66 | L   | 903.51  | 452.26 | 886.49  | 443.75 | 885.5   | 443.26 | 8     |
| 6  | 713.37  | 357.19 |         |        | 695.36  | 348.18 | E   | 790.43  | 395.72 | 773.4   | 387.21 | 772.42  | 386.71 | 7     |
| 7  | 800.4   | 400.71 |         |        | 782.39  | 391.7  | S   | 661.39  | 331.2  | 644.36  | 322.68 | 643.38  | 322.19 | 6     |
| 8  | 913.49  | 457.25 |         |        | 895.48  | 448.24 | I   | 574.36  | 287.68 | 557.33  | 279.17 | 556.35  | 278.68 | 5     |
| 9  | 1027.53 | 514.27 | 1010.5  | 505.76 | 1009.52 | 505.26 | N   | 461.27  | 231.14 | 444.25  | 222.63 | 443.26  | 222.13 | 4     |
| 10 | 1114.56 | 557.78 | 1097.54 | 549.27 | 1096.55 | 548.78 | S   | 347.23  | 174.12 | 330.2   | 165.6  | 329.22  | 165.11 | 3     |
| 11 | 1227.65 | 614.33 | 1210.62 | 605.81 | 1209.64 | 605.32 | I   | 260.2   | 130.6  | 243.17  | 122.09 |         |        | 2     |
| 12 |         |        |         |        |         |        | K   | 147.11  | 74.06  | 130.09  | 65.55  |         |        | 1     |

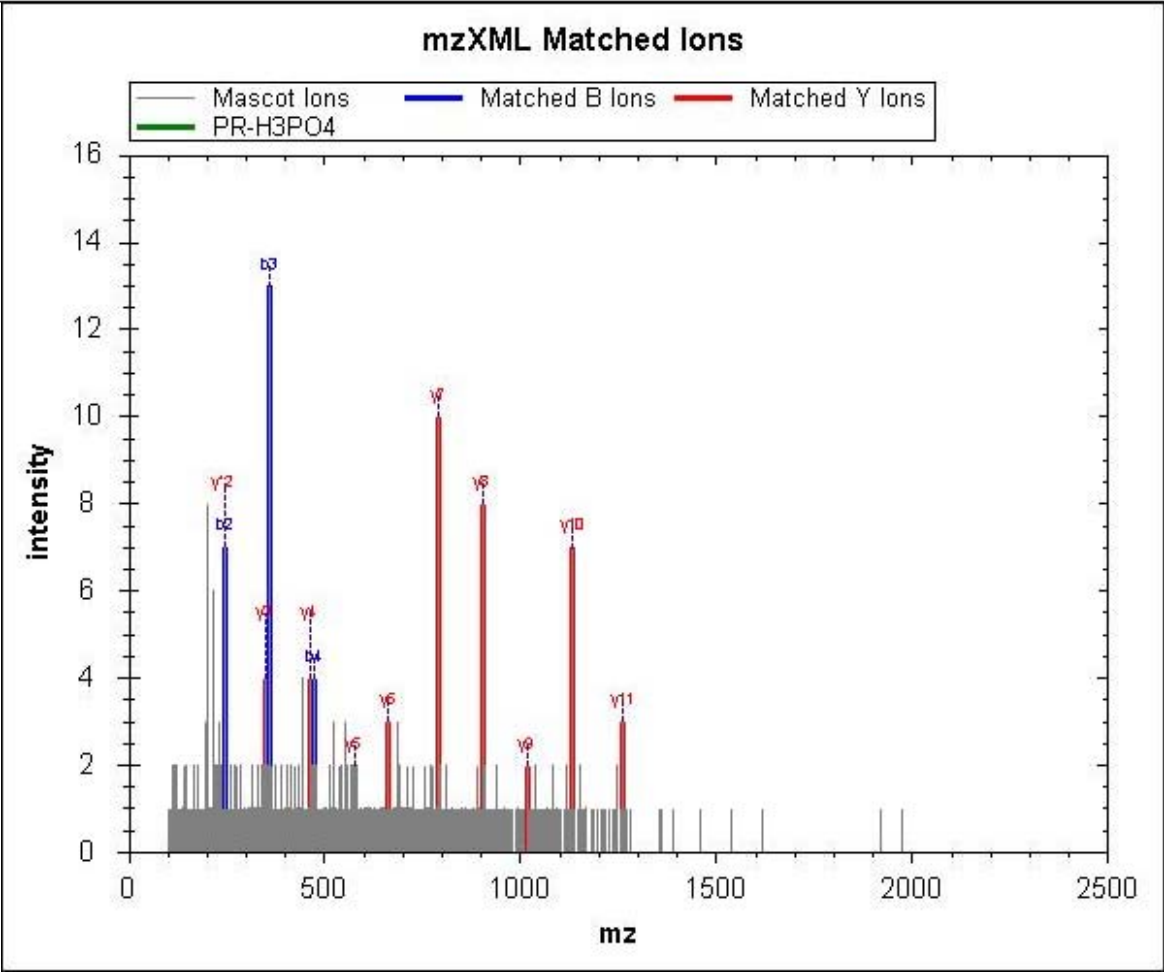

Protein index=1195, ACC No: IPI00176696

Peptide index=1168 MS/MS spectrum

Sequence: NIVEAAVR, m/z:471.7709, charge:+ 2, Modification: , Mod Position:

Score: 58.27, Raw data:WET\_A5\_090615\_02.mzxml, MS/MS Elution time: 30.2195, Scan number:1526, Mass delta:-0.0002, Rank:1

| No | b      | b++    | b*     | b*++   | b0     | b0++   | Seq | y      | y++    | y*     | y*++   | y0     | y0++   | RevNo |
|----|--------|--------|--------|--------|--------|--------|-----|--------|--------|--------|--------|--------|--------|-------|
| 1  | 115.05 | 58.03  | 98.02  | 49.52  |        |        | N   |        |        |        |        |        |        | 9     |
| 2  | 228.13 | 114.57 | 211.11 | 106.06 |        |        | I   | 828.49 | 414.75 | 811.47 | 406.24 | 810.48 | 405.75 | 8     |
| 3  | 327.2  | 164.1  | 310.18 | 155.59 |        |        | V   | 715.41 | 358.21 | 698.38 | 349.7  | 697.4  | 349.2  | 7     |
| 4  | 456.25 | 228.63 | 439.22 | 220.11 | 438.23 | 219.62 | E   | 616.34 | 308.67 | 599.31 | 300.16 | 598.33 | 299.67 | 6     |
| 5  | 527.28 | 264.14 | 510.26 | 255.63 | 509.27 | 255.14 | A   | 487.3  | 244.15 | 470.27 | 235.64 |        |        | 5     |
| 6  | 598.32 | 299.66 | 581.29 | 291.15 | 580.31 | 290.66 | A   | 416.26 | 208.63 | 399.24 | 200.12 |        |        | 4     |
| 7  | 669.36 | 335.18 | 652.33 | 326.67 | 651.35 | 326.18 | A   | 345.22 | 173.12 | 328.2  | 164.6  |        |        | 3     |
| 8  | 768.42 | 384.72 | 751.4  | 376.2  | 750.41 | 375.71 | V   | 274.19 | 137.6  | 257.16 | 129.08 |        |        | 2     |
| 9  |        |        |        |        |        |        | R   | 175.12 | 88.06  | 158.09 | 79.55  |        |        | 1     |

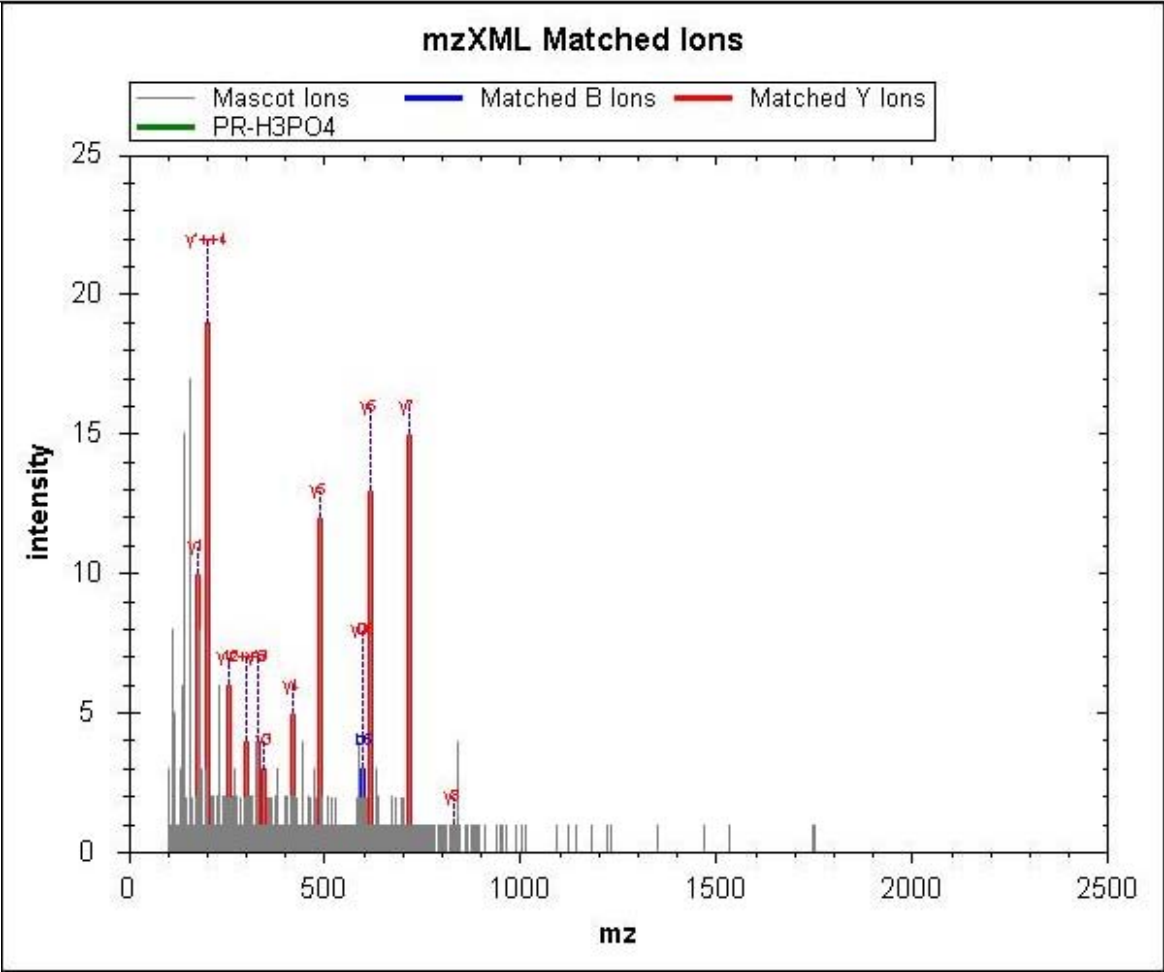

Protein index=1197, ACC No: IPI00012493

Peptide index=1134 MS/MS spectrum

Sequence: TPVEPEVAIHR, m/z:416.5575, charge:+ 3, Modification: , Mod Position:

Score: 87.08, Raw data:WET\_A5\_090615\_01.mzxml, MS/MS Elution time: 29.701, Scan number:1503, Mass delta:-0.0162, Rank:1

| No | b       | b++    | b0      | b0++   | Seq | y       | y++    | y*      | y*++   | y0      | y0++   | RevNo |
|----|---------|--------|---------|--------|-----|---------|--------|---------|--------|---------|--------|-------|
| 1  | 102.05  | 51.53  | 84.04   | 42.53  | T   |         |        |         |        |         |        | 11    |
| 2  | 199.11  | 100.06 | 181.1   | 91.05  | P   | 1146.63 | 573.82 | 1129.6  | 565.3  | 1128.62 | 564.81 | 10    |
| 3  | 298.18  | 149.59 | 280.17  | 140.59 | V   | 1049.57 | 525.29 | 1032.55 | 516.78 | 1031.56 | 516.29 | 9     |
| 4  | 427.22  | 214.11 | 409.21  | 205.11 | E   | 950.51  | 475.76 | 933.48  | 467.24 | 932.49  | 466.75 | 8     |
| 5  | 524.27  | 262.64 | 506.26  | 253.63 | P   | 821.46  | 411.24 | 804.44  | 402.72 | 803.45  | 402.23 | 7     |
| 6  | 653.31  | 327.16 | 635.3   | 318.16 | E   | 724.41  | 362.71 | 707.38  | 354.2  | 706.4   | 353.7  | 6     |
| 7  | 752.38  | 376.69 | 734.37  | 367.69 | V   | 595.37  | 298.19 | 578.34  | 289.67 |         |        | 5     |
| 8  | 823.42  | 412.21 | 805.41  | 403.21 | A   | 496.3   | 248.65 | 479.27  | 240.14 |         |        | 4     |
| 9  | 936.5   | 468.76 | 918.49  | 459.75 | I   | 425.26  | 213.13 | 408.24  | 204.62 |         |        | 3     |
| 10 | 1073.56 | 537.28 | 1055.55 | 528.28 | H   | 312.18  | 156.59 | 295.15  | 148.08 |         |        | 2     |
| 11 |         |        |         |        | R   | 175.12  | 88.06  | 158.09  | 79.55  |         |        | 1     |

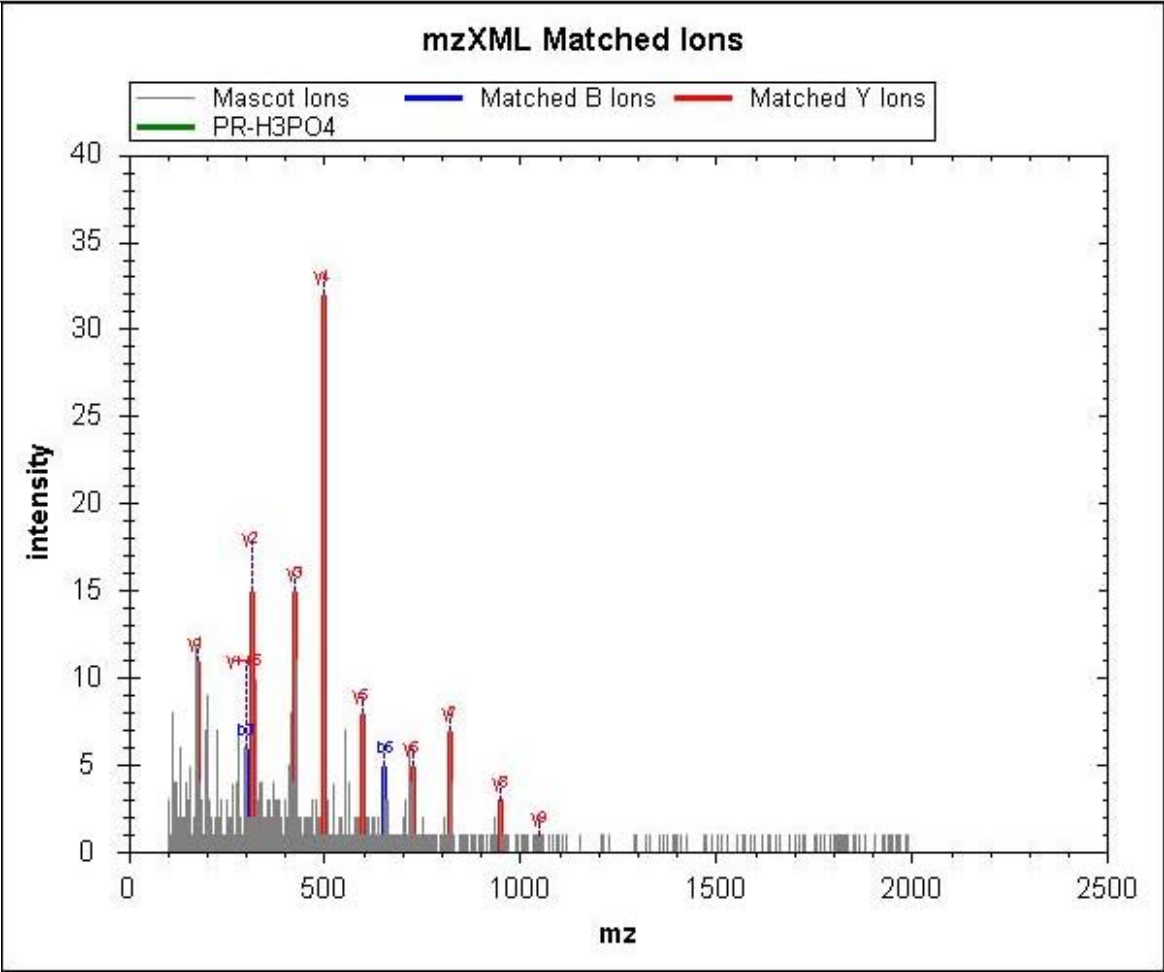

Protein index=1198, ACC No: IPI00015550

Peptide index=17 MS/MS spectrum

Sequence: AAEDDEDDVDTKK, m/z:522.5478, charge:+ 3, Modification: , Mod Position:

Score: 78.11, Raw data:WET\_A5\_090615\_02.mzxml, MS/MS Elution time: 14.45243, Scan number:598, Mass delta:-0.0164, Rank:1

| No | b       | b++    | b* | b*++ | b0      | b0++   | Seq | y       | y++    | y*      | y*++   | y0      | y0++   | RevNo |
|----|---------|--------|----|------|---------|--------|-----|---------|--------|---------|--------|---------|--------|-------|
| 1  | 72.04   | 36.53  |    |      |         |        | A   |         |        |         |        |         |        | 14    |
| 2  | 143.08  | 72.04  |    |      |         |        | A   | 1494.61 | 747.81 | 1477.58 | 739.29 | 1476.6  | 738.8  | 13    |
| 3  | 272.12  | 136.57 |    |      | 254.11  | 127.56 | E   | 1423.57 | 712.29 | 1406.54 | 703.78 | 1405.56 | 703.28 | 12    |
| 4  | 387.15  | 194.08 |    |      | 369.14  | 185.07 | D   | 1294.53 | 647.77 | 1277.5  | 639.25 | 1276.52 | 638.76 | 11    |
| 5  | 502.18  | 251.59 |    |      | 484.17  | 242.59 | D   | 1179.5  | 590.25 | 1162.47 | 581.74 | 1161.49 | 581.25 | 10    |
| 6  | 631.22  | 316.11 |    |      | 613.21  | 307.11 | E   | 1064.47 | 532.74 | 1047.45 | 524.23 | 1046.46 | 523.74 | 9     |
| 7  | 746.25  | 373.63 |    |      | 728.24  | 364.62 | D   | 935.43  | 468.22 | 918.4   | 459.71 | 917.42  | 459.21 | 8     |
| 8  | 861.27  | 431.14 |    |      | 843.26  | 422.14 | D   | 820.4   | 410.71 | 803.38  | 402.19 | 802.39  | 401.7  | 7     |
| 9  | 976.3   | 488.65 |    |      | 958.29  | 479.65 | D   | 705.38  | 353.19 | 688.35  | 344.68 | 687.37  | 344.19 | 6     |
| 10 | 1075.37 | 538.19 |    |      | 1057.36 | 529.18 | V   | 590.35  | 295.68 | 573.32  | 287.17 | 572.34  | 286.67 | 5     |
| 11 | 1190.4  | 595.7  |    |      | 1172.39 | 586.7  | D   | 491.28  | 246.14 | 474.26  | 237.63 | 473.27  | 237.14 | 4     |
| 12 | 1291.44 | 646.23 |    |      | 1273.43 | 637.22 | T   | 376.26  | 188.63 | 359.23  | 180.12 | 358.24  | 179.63 | 3     |

|    |         |        |         |        |         |        |   |        |        |        |        |  |  |   |
|----|---------|--------|---------|--------|---------|--------|---|--------|--------|--------|--------|--|--|---|
| 13 | 1419.54 | 710.27 | 1402.51 | 701.76 | 1401.53 | 701.27 | K | 275.21 | 138.11 | 258.18 | 129.59 |  |  | 2 |
| 14 |         |        |         |        |         |        | K | 147.11 | 74.06  | 130.09 | 65.55  |  |  | 1 |

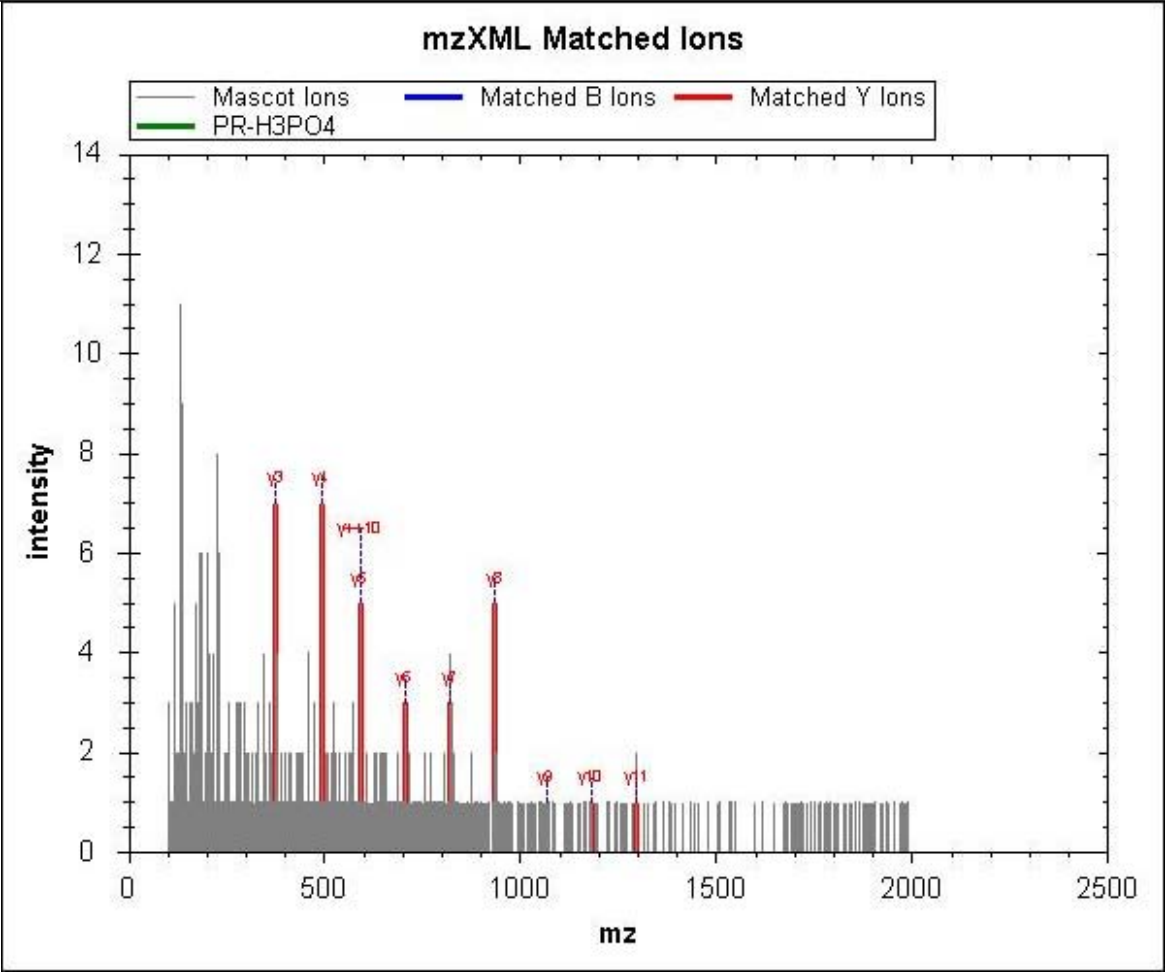

Protein index=1199, ACC No: IPI00056357

Peptide index=2564 MS/MS spectrum

Sequence: ESDVPLKTEEFVTK, m/z:584.2936, charge:+ 3, Modification: , Mod Position:

Score: 53.12, Raw data:WET\_A5\_090615\_01.mzxml, MS/MS Elution time: 45.21233, Scan number:2411, Mass delta:-0.0083, Rank:1

| No | b       | b++    | b*      | b*++   | b0      | b0++   | Seq | y       | y++    | y*      | y*++   | y0      | y0++   | RevNo |
|----|---------|--------|---------|--------|---------|--------|-----|---------|--------|---------|--------|---------|--------|-------|
| 1  | 130.05  | 65.53  |         |        | 112.04  | 56.52  | E   |         |        |         |        |         |        | 15    |
| 2  | 217.08  | 109.04 |         |        | 199.07  | 100.04 | S   | 1621.83 | 811.42 | 1604.81 | 802.91 | 1603.82 | 802.41 | 14    |
| 3  | 332.11  | 166.56 |         |        | 314.1   | 157.55 | D   | 1534.8  | 767.9  | 1517.77 | 759.39 | 1516.79 | 758.9  | 13    |
| 4  | 431.18  | 216.09 |         |        | 413.17  | 207.09 | V   | 1419.77 | 710.39 | 1402.75 | 701.88 | 1401.76 | 701.38 | 12    |
| 5  | 528.23  | 264.62 |         |        | 510.22  | 255.61 | P   | 1320.7  | 660.86 | 1303.68 | 652.34 | 1302.69 | 651.85 | 11    |
| 6  | 641.31  | 321.16 |         |        | 623.3   | 312.16 | L   | 1223.65 | 612.33 | 1206.63 | 603.82 | 1205.64 | 603.32 | 10    |
| 7  | 769.41  | 385.21 | 752.38  | 376.69 | 751.4   | 376.2  | K   | 1110.57 | 555.79 | 1093.54 | 547.27 | 1092.56 | 546.78 | 9     |
| 8  | 870.46  | 435.73 | 853.43  | 427.22 | 852.45  | 426.73 | T   | 982.47  | 491.74 | 965.45  | 483.23 | 964.46  | 482.73 | 8     |
| 9  | 999.5   | 500.25 | 982.47  | 491.74 | 981.49  | 491.25 | E   | 881.43  | 441.22 | 864.4   | 432.7  | 863.41  | 432.21 | 7     |
| 10 | 1128.54 | 564.77 | 1111.52 | 556.26 | 1110.53 | 555.77 | E   | 752.38  | 376.69 | 735.36  | 368.18 | 734.37  | 367.69 | 6     |

|    |         |        |         |        |         |        |   |        |        |        |        |        |        |   |
|----|---------|--------|---------|--------|---------|--------|---|--------|--------|--------|--------|--------|--------|---|
| 11 | 1275.61 | 638.31 | 1258.58 | 629.8  | 1257.6  | 629.3  | F | 623.34 | 312.17 | 606.31 | 303.66 | 605.33 | 303.17 | 5 |
| 12 | 1404.65 | 702.83 | 1387.63 | 694.32 | 1386.64 | 693.82 | E | 476.27 | 238.64 | 459.24 | 230.13 | 458.26 | 229.63 | 4 |
| 13 | 1503.72 | 752.36 | 1486.69 | 743.85 | 1485.71 | 743.36 | V | 347.23 | 174.12 | 330.2  | 165.6  | 329.22 | 165.11 | 3 |
| 14 | 1604.77 | 802.89 | 1587.74 | 794.37 | 1586.76 | 793.88 | T | 248.16 | 124.58 | 231.13 | 116.07 | 230.15 | 115.58 | 2 |
| 15 |         |        |         |        |         |        | K | 147.11 | 74.06  | 130.09 | 65.55  |        |        | 1 |

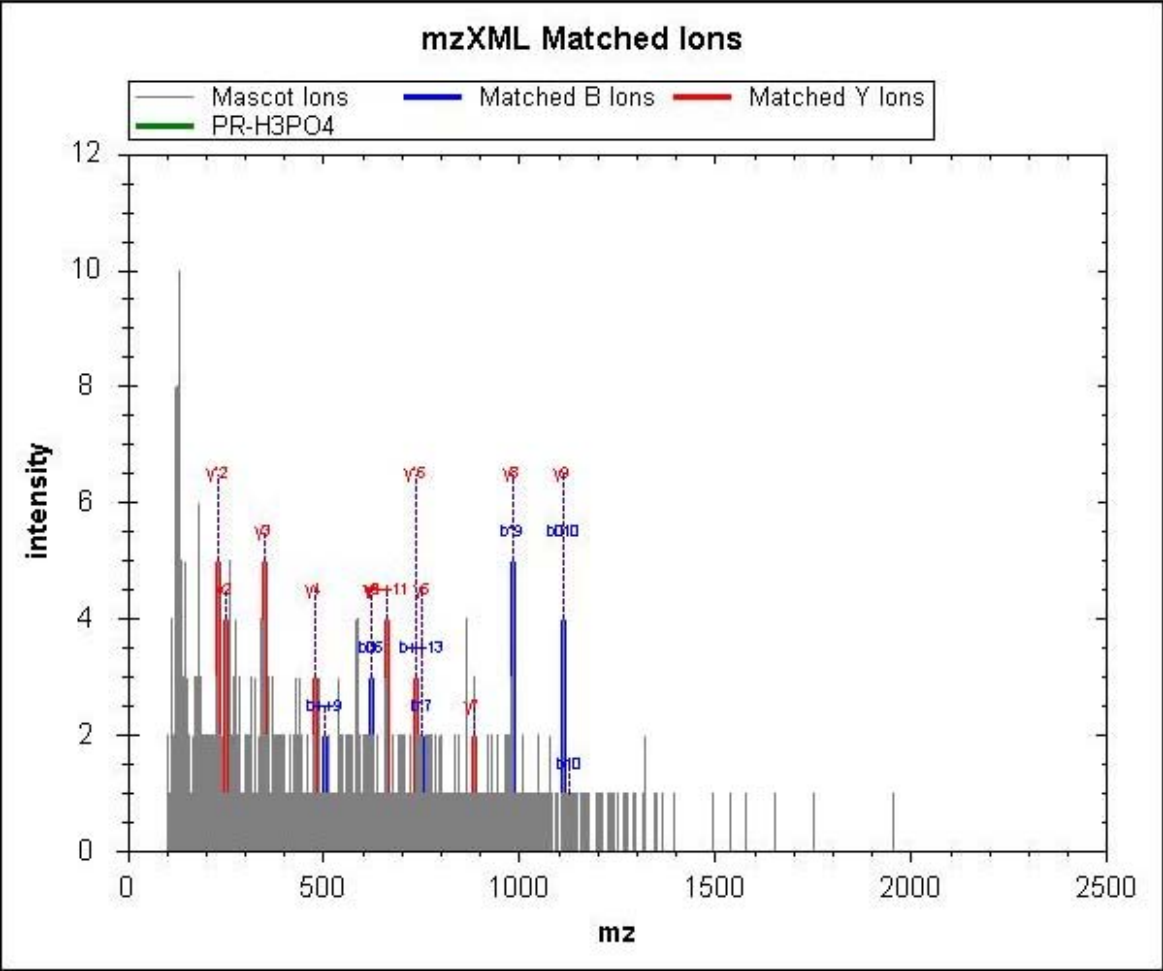

|    |         |        |         |        |   |        |        |        |        |   |
|----|---------|--------|---------|--------|---|--------|--------|--------|--------|---|
| 7  | 801.49  | 401.25 | 784.46  | 392.73 | V | 960.53 | 480.77 | 943.5  | 472.26 | 9 |
| 8  | 948.52  | 474.76 | 931.5   | 466.25 | M | 861.46 | 431.23 | 844.43 | 422.72 | 8 |
| 9  | 1005.54 | 503.28 | 988.52  | 494.76 | G | 714.43 | 357.72 | 697.4  | 349.2  | 7 |
| 10 | 1104.61 | 552.81 | 1087.59 | 544.3  | V | 657.4  | 329.21 | 640.38 | 320.69 | 6 |
| 11 | 1232.67 | 616.84 | 1215.64 | 608.33 | Q | 558.34 | 279.67 | 541.31 | 271.16 | 5 |
| 12 | 1331.74 | 666.37 | 1314.71 | 657.86 | V | 430.28 | 215.64 | 413.25 | 207.13 | 4 |
| 13 | 1430.81 | 715.91 | 1413.78 | 707.39 | V | 331.21 | 166.11 | 314.18 | 157.59 | 3 |
| 14 | 1487.83 | 744.42 | 1470.8  | 735.9  | G | 232.14 | 116.57 | 215.11 | 108.06 | 2 |
| 15 |         |        |         |        | R | 175.12 | 88.06  | 158.09 | 79.55  | 1 |

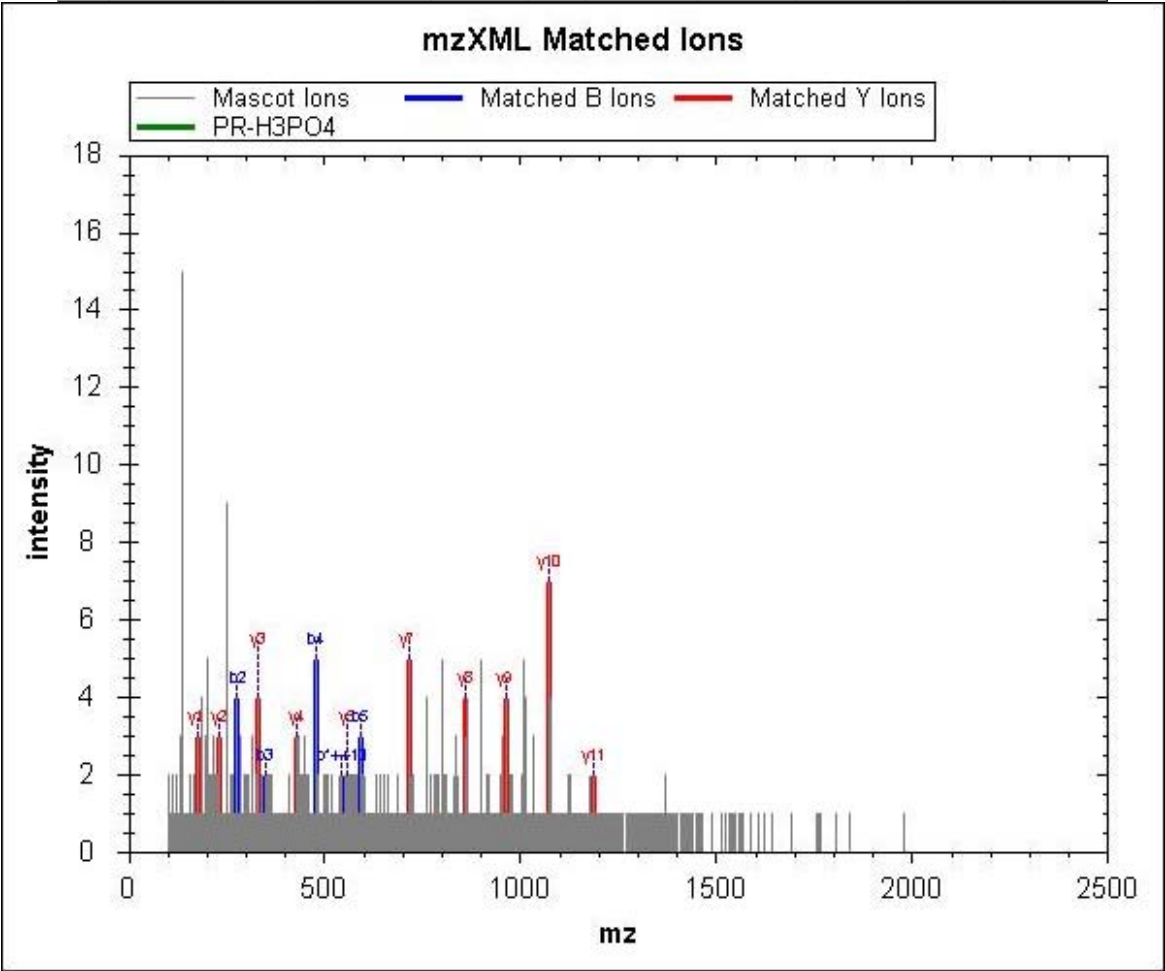

Protein index=1207, ACC No: IPI00219871

Peptide index=5189 MS/MS spectrum

Sequence: GFDQTINLILDESHER, m/z:629.6437, charge:+ 3, Modification: , Mod Position:

Score: 60.7, Raw data:WET\_B5\_090616\_03.mzxml, MS/MS Elution time: 70.39467, Scan number:3884, Mass delta:-0.0139, Rank:1

| No | b      | b++    | b* | b*++ | b0     | b0++   | Seq | y       | y++    | y*      | y*++   | y0      | y0++   | RevNo |
|----|--------|--------|----|------|--------|--------|-----|---------|--------|---------|--------|---------|--------|-------|
| 1  | 58.03  | 29.52  |    |      |        |        | G   |         |        |         |        |         |        | 16    |
| 2  | 205.1  | 103.05 |    |      |        |        | F   | 1829.9  | 915.46 | 1812.88 | 906.94 | 1811.89 | 906.45 | 15    |
| 3  | 320.12 | 160.57 |    |      | 302.11 | 151.56 | D   | 1682.83 | 841.92 | 1665.81 | 833.41 | 1664.82 | 832.92 | 14    |

|    |         |        |         |        |         |        |   |         |        |         |        |         |        |    |
|----|---------|--------|---------|--------|---------|--------|---|---------|--------|---------|--------|---------|--------|----|
| 4  | 448.18  | 224.59 | 431.16  | 216.08 | 430.17  | 215.59 | Q | 1567.81 | 784.41 | 1550.78 | 775.89 | 1549.8  | 775.4  | 13 |
| 5  | 549.23  | 275.12 | 532.2   | 266.61 | 531.22  | 266.11 | T | 1439.75 | 720.38 | 1422.72 | 711.86 | 1421.74 | 711.37 | 12 |
| 6  | 662.31  | 331.66 | 645.29  | 323.15 | 644.3   | 322.66 | I | 1338.7  | 669.85 | 1321.67 | 661.34 | 1320.69 | 660.85 | 11 |
| 7  | 776.36  | 388.68 | 759.33  | 380.17 | 758.35  | 379.68 | N | 1225.62 | 613.31 | 1208.59 | 604.8  | 1207.61 | 604.31 | 10 |
| 8  | 889.44  | 445.22 | 872.41  | 436.71 | 871.43  | 436.22 | L | 1111.57 | 556.29 | 1094.55 | 547.78 | 1093.56 | 547.29 | 9  |
| 9  | 1002.53 | 501.77 | 985.5   | 493.25 | 984.51  | 492.76 | I | 998.49  | 499.75 | 981.46  | 491.24 | 980.48  | 490.74 | 8  |
| 10 | 1115.61 | 558.31 | 1098.58 | 549.8  | 1097.6  | 549.3  | L | 885.41  | 443.21 | 868.38  | 434.69 | 867.4   | 434.2  | 7  |
| 11 | 1230.64 | 615.82 | 1213.61 | 607.31 | 1212.63 | 606.82 | D | 772.32  | 386.66 | 755.3   | 378.15 | 754.31  | 377.66 | 6  |
| 12 | 1359.68 | 680.34 | 1342.65 | 671.83 | 1341.67 | 671.34 | E | 657.3   | 329.15 | 640.27  | 320.64 | 639.28  | 320.15 | 5  |
| 13 | 1446.71 | 723.86 | 1429.68 | 715.35 | 1428.7  | 714.85 | S | 528.25  | 264.63 | 511.23  | 256.12 | 510.24  | 255.62 | 4  |
| 14 | 1583.77 | 792.39 | 1566.74 | 783.88 | 1565.76 | 783.38 | H | 441.22  | 221.11 | 424.19  | 212.6  | 423.21  | 212.11 | 3  |
| 15 | 1712.81 | 856.91 | 1695.79 | 848.4  | 1694.8  | 847.9  | E | 304.16  | 152.58 | 287.13  | 144.07 | 286.15  | 143.58 | 2  |
| 16 |         |        |         |        |         |        | R | 175.12  | 88.06  | 158.09  | 79.55  |         |        | 1  |

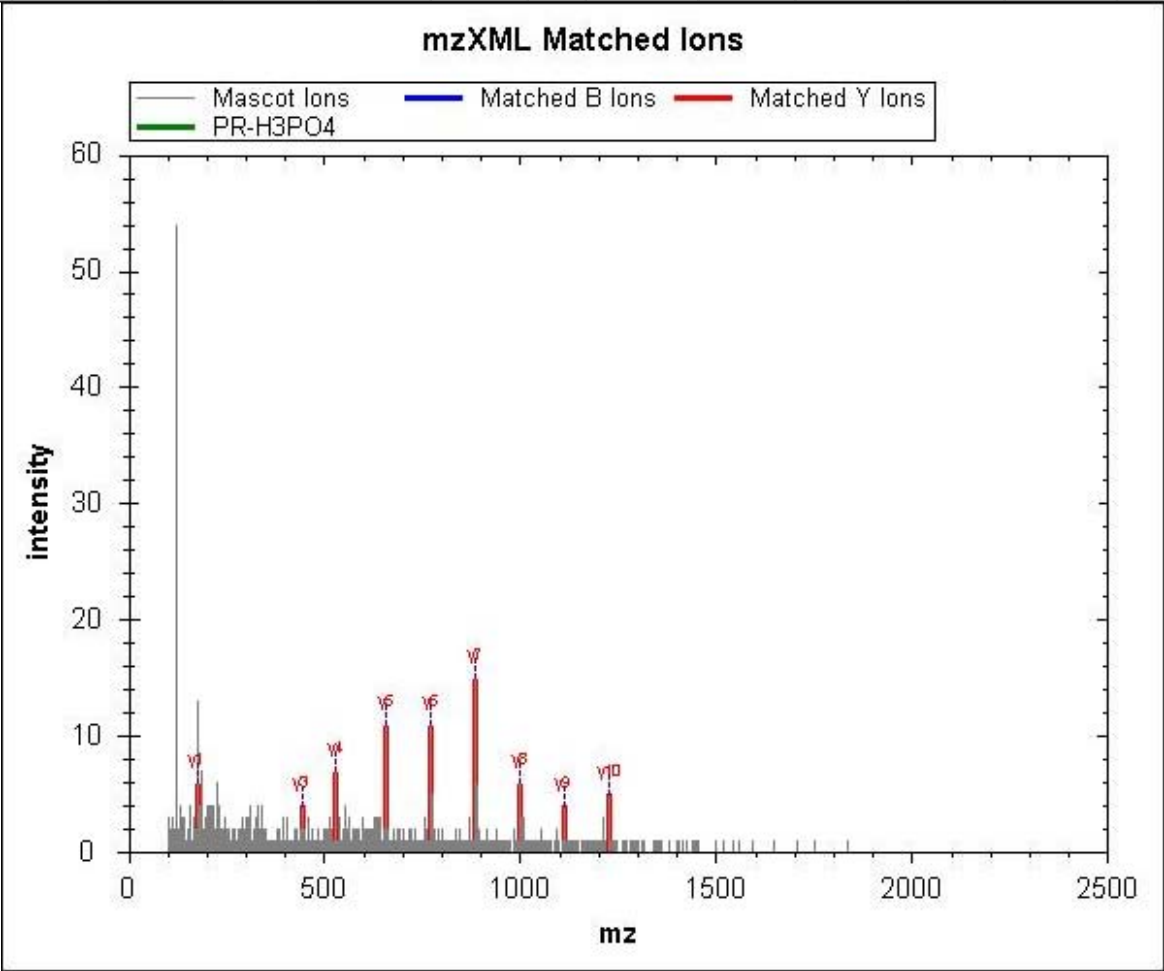

Protein index=1208, ACC No: IPI00218144

Peptide index=1084 MS/MS spectrum

Sequence: PGLVDSNPAPPESQEK, m/z:832.9089, charge:+ 2, Modification: , Mod Position:

Score: 75.67, Raw data:WET\_A5\_090615\_03.mzxml, MS/MS Elution time: 29.03633, Scan number:1459, Mass delta:-0.0001, Rank:1

| No | b       | b++    | b*      | b*++   | b0      | b0++   | Seq | y       | y++    | y*      | y*++   | y0      | y0++   | RevNo |
|----|---------|--------|---------|--------|---------|--------|-----|---------|--------|---------|--------|---------|--------|-------|
| 1  | 98.06   | 49.53  |         |        |         |        | P   |         |        |         |        |         |        | 16    |
| 2  | 155.08  | 78.04  |         |        |         |        | G   | 1567.76 | 784.38 | 1550.73 | 775.87 | 1549.75 | 775.38 | 15    |
| 3  | 268.17  | 134.59 |         |        |         |        | L   | 1510.74 | 755.87 | 1493.71 | 747.36 | 1492.73 | 746.87 | 14    |
| 4  | 367.23  | 184.12 |         |        |         |        | V   | 1397.65 | 699.33 | 1380.63 | 690.82 | 1379.64 | 690.33 | 13    |
| 5  | 482.26  | 241.63 |         |        | 464.25  | 232.63 | D   | 1298.59 | 649.8  | 1281.56 | 641.28 | 1280.58 | 640.79 | 12    |
| 6  | 569.29  | 285.15 |         |        | 551.28  | 276.14 | S   | 1183.56 | 592.28 | 1166.53 | 583.77 | 1165.55 | 583.28 | 11    |
| 7  | 683.34  | 342.17 | 666.31  | 333.66 | 665.33  | 333.17 | N   | 1096.53 | 548.77 | 1079.5  | 540.25 | 1078.52 | 539.76 | 10    |
| 8  | 780.39  | 390.7  | 763.36  | 382.18 | 762.38  | 381.69 | P   | 982.48  | 491.75 | 965.46  | 483.23 | 964.47  | 482.74 | 9     |
| 9  | 851.43  | 426.22 | 834.4   | 417.7  | 833.42  | 417.21 | A   | 885.43  | 443.22 | 868.4   | 434.71 | 867.42  | 434.21 | 8     |
| 10 | 948.48  | 474.74 | 931.45  | 466.23 | 930.47  | 465.74 | P   | 814.39  | 407.7  | 797.37  | 399.19 | 796.38  | 398.7  | 7     |
| 11 | 1045.53 | 523.27 | 1028.5  | 514.76 | 1027.52 | 514.26 | P   | 717.34  | 359.17 | 700.31  | 350.66 | 699.33  | 350.17 | 6     |
| 12 | 1174.57 | 587.79 | 1157.55 | 579.28 | 1156.56 | 578.79 | E   | 620.29  | 310.65 | 603.26  | 302.13 | 602.28  | 301.64 | 5     |
| 13 | 1261.61 | 631.31 | 1244.58 | 622.79 | 1243.6  | 622.3  | S   | 491.25  | 246.13 | 474.22  | 237.61 | 473.24  | 237.12 | 4     |
| 14 | 1389.66 | 695.34 | 1372.64 | 686.82 | 1371.65 | 686.33 | Q   | 404.21  | 202.61 | 387.19  | 194.1  | 386.2   | 193.61 | 3     |
| 15 | 1518.71 | 759.86 | 1501.68 | 751.34 | 1500.7  | 750.85 | E   | 276.16  | 138.58 | 259.13  | 130.07 | 258.14  | 129.58 | 2     |
| 16 |         |        |         |        |         |        | K   | 147.11  | 74.06  | 130.09  | 65.55  |         |        | 1     |

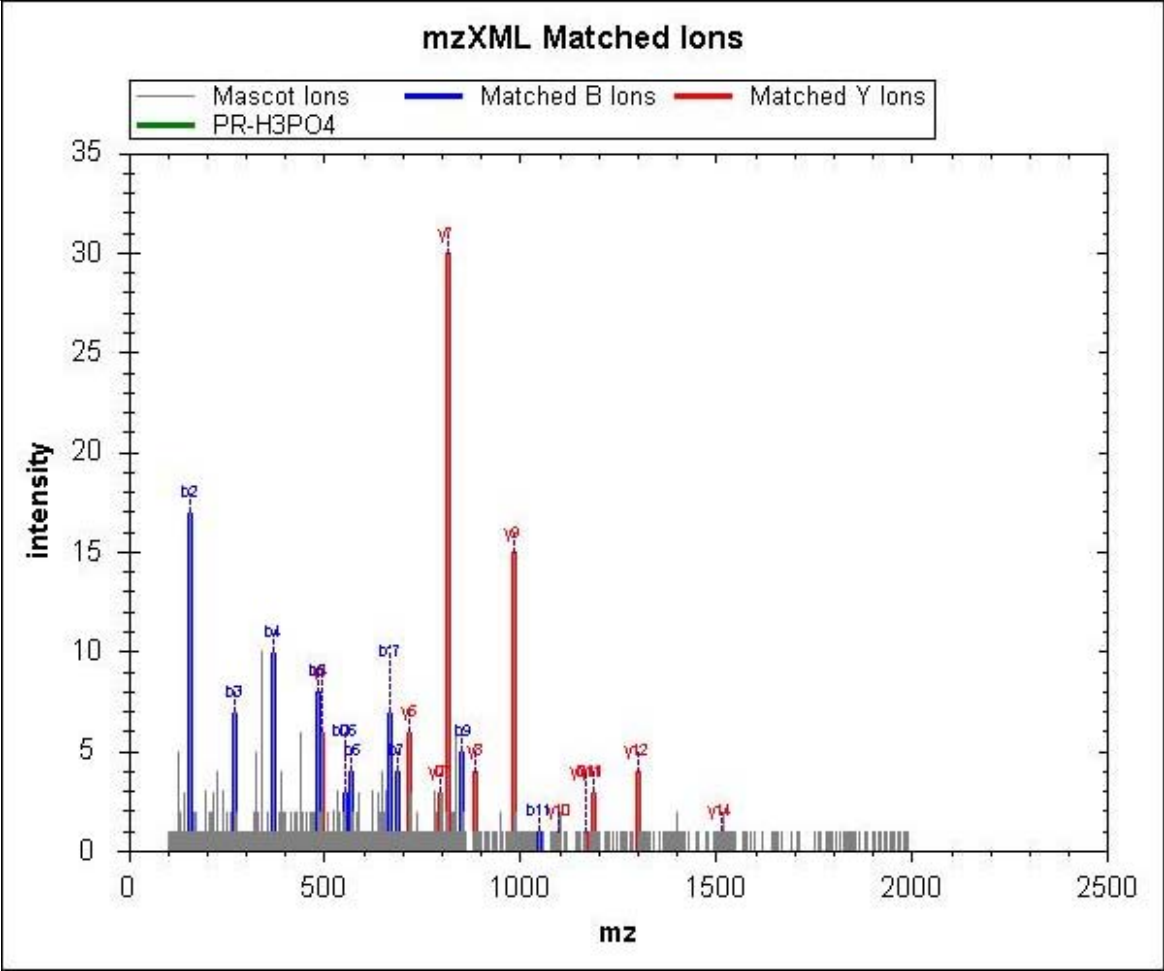

Protein index=1209, ACC No:IP100386229

Peptide index=4853 MS/MS spectrum



Peptide index=5411 MS/MS spectrum

Sequence: EQLGPVTQEFWDNLEK, m/z:966.9724, charge:+ 2, Modification: , Mod Position:

Score: 93.2, Raw data:WET\_B5\_090616\_01.mzxml, MS/MS Elution time: 73.17266, Scan number:4023, Mass delta:-0.0015, Rank:1

| No | b       | b++    | b*      | b*++   | b0      | b0++   | Seq | y       | y++    | y*      | y*++   | y0      | y0++   | RevNo |
|----|---------|--------|---------|--------|---------|--------|-----|---------|--------|---------|--------|---------|--------|-------|
| 1  | 130.05  | 65.53  |         |        | 112.04  | 56.52  | E   |         |        |         |        |         |        | 16    |
| 2  | 258.11  | 129.56 | 241.08  | 121.04 | 240.1   | 120.55 | Q   | 1803.89 | 902.45 | 1786.86 | 893.94 | 1785.88 | 893.44 | 15    |
| 3  | 371.19  | 186.1  | 354.17  | 177.59 | 353.18  | 177.09 | L   | 1675.83 | 838.42 | 1658.81 | 829.91 | 1657.82 | 829.41 | 14    |
| 4  | 428.21  | 214.61 | 411.19  | 206.1  | 410.2   | 205.61 | G   | 1562.75 | 781.88 | 1545.72 | 773.36 | 1544.74 | 772.87 | 13    |
| 5  | 525.27  | 263.14 | 508.24  | 254.62 | 507.26  | 254.13 | P   | 1505.73 | 753.37 | 1488.7  | 744.85 | 1487.72 | 744.36 | 12    |
| 6  | 624.34  | 312.67 | 607.31  | 304.16 | 606.32  | 303.67 | V   | 1408.67 | 704.84 | 1391.65 | 696.33 | 1390.66 | 695.84 | 11    |
| 7  | 725.38  | 363.2  | 708.36  | 354.68 | 707.37  | 354.19 | T   | 1309.61 | 655.31 | 1292.58 | 646.79 | 1291.6  | 646.3  | 10    |
| 8  | 853.44  | 427.22 | 836.41  | 418.71 | 835.43  | 418.22 | Q   | 1208.56 | 604.78 | 1191.53 | 596.27 | 1190.55 | 595.78 | 9     |
| 9  | 982.48  | 491.75 | 965.46  | 483.23 | 964.47  | 482.74 | E   | 1080.5  | 540.75 | 1063.47 | 532.24 | 1062.49 | 531.75 | 8     |
| 10 | 1129.55 | 565.28 | 1112.53 | 556.77 | 1111.54 | 556.27 | F   | 951.46  | 476.23 | 934.43  | 467.72 | 933.45  | 467.23 | 7     |
| 11 | 1315.63 | 658.32 | 1298.61 | 649.81 | 1297.62 | 649.31 | W   | 804.39  | 402.7  | 787.36  | 394.18 | 786.38  | 393.69 | 6     |
| 12 | 1430.66 | 715.83 | 1413.63 | 707.32 | 1412.65 | 706.83 | D   | 618.31  | 309.66 | 601.28  | 301.15 | 600.3   | 300.65 | 5     |
| 13 | 1544.7  | 772.85 | 1527.68 | 764.34 | 1526.69 | 763.85 | N   | 503.28  | 252.14 | 486.26  | 243.63 | 485.27  | 243.14 | 4     |
| 14 | 1657.79 | 829.4  | 1640.76 | 820.88 | 1639.78 | 820.39 | L   | 389.24  | 195.12 | 372.21  | 186.61 | 371.23  | 186.12 | 3     |
| 15 | 1786.83 | 893.92 | 1769.8  | 885.4  | 1768.82 | 884.91 | E   | 276.16  | 138.58 | 259.13  | 130.07 | 258.14  | 129.58 | 2     |
| 16 |         |        |         |        |         |        | K   | 147.11  | 74.06  | 130.09  | 65.55  |         |        | 1     |

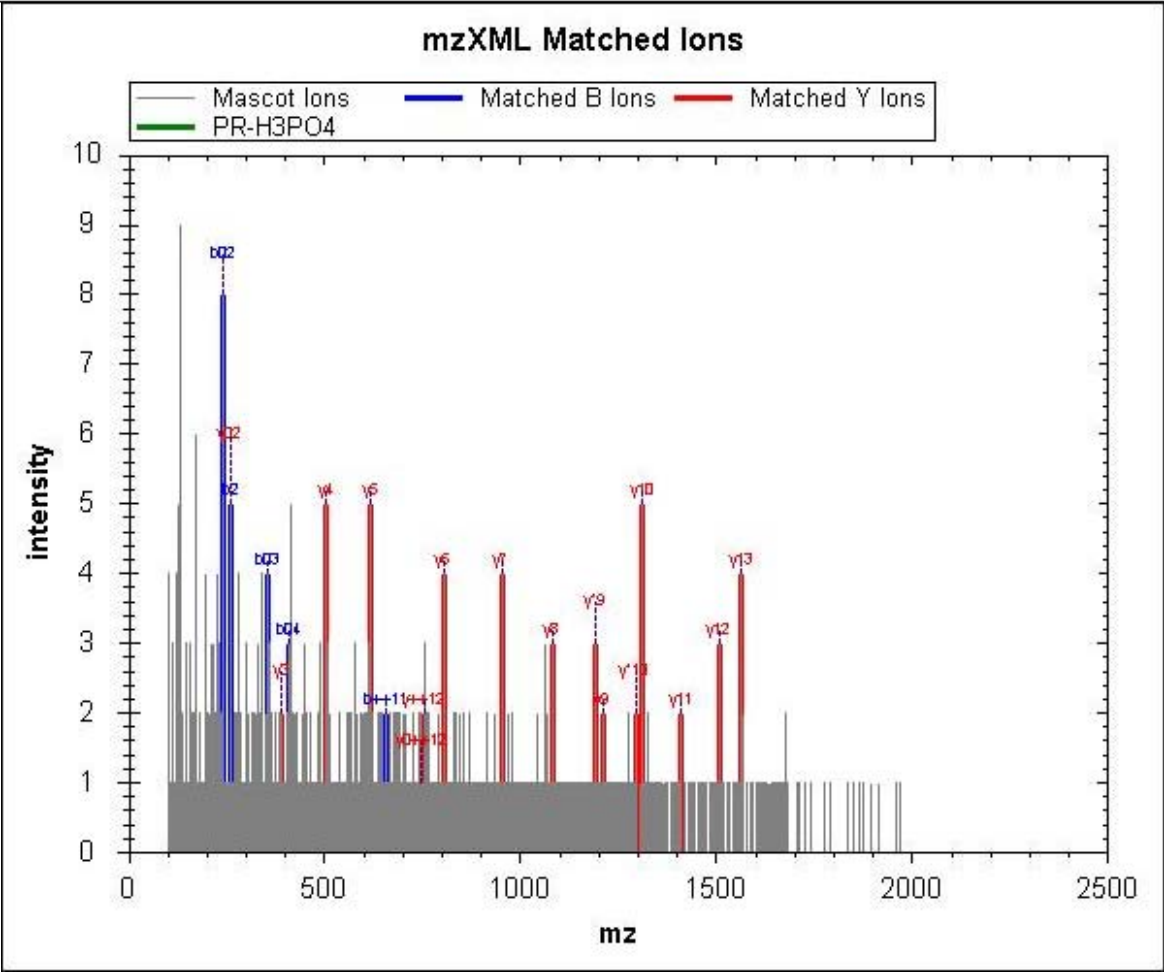

Protein index=1211, ACC No: IPI00443909

Peptide index=2704 MS/MS spectrum

Sequence: INPDGSQSVVEVPYAR, m/z:865.9365, charge:+ 2, Modification: , Mod Position:

Score: 118.91, Raw data:WET\_A5\_090615\_02.mzxml, MS/MS Elution time: 46.54717, Scan number:2482, Mass delta:-0.0128, Rank:1

| No | b       | b++    | b*      | b*++   | b0      | b0++   | Seq | y       | y++    | y*      | y*++   | y0      | y0++   | RevNo |
|----|---------|--------|---------|--------|---------|--------|-----|---------|--------|---------|--------|---------|--------|-------|
| 1  | 114.09  | 57.55  |         |        |         |        | I   |         |        |         |        |         |        | 16    |
| 2  | 228.13  | 114.57 | 211.11  | 106.06 |         |        | N   | 1617.79 | 809.4  | 1600.76 | 800.88 | 1599.78 | 800.39 | 15    |
| 3  | 325.19  | 163.1  | 308.16  | 154.58 |         |        | P   | 1503.74 | 752.38 | 1486.72 | 743.86 | 1485.73 | 743.37 | 14    |
| 4  | 440.21  | 220.61 | 423.19  | 212.1  | 422.2   | 211.61 | D   | 1406.69 | 703.85 | 1389.66 | 695.34 | 1388.68 | 694.84 | 13    |
| 5  | 497.24  | 249.12 | 480.21  | 240.61 | 479.22  | 240.12 | G   | 1291.66 | 646.34 | 1274.64 | 637.82 | 1273.65 | 637.33 | 12    |
| 6  | 584.27  | 292.64 | 567.24  | 284.12 | 566.26  | 283.63 | S   | 1234.64 | 617.82 | 1217.62 | 609.31 | 1216.63 | 608.82 | 11    |
| 7  | 712.33  | 356.67 | 695.3   | 348.15 | 694.32  | 347.66 | Q   | 1147.61 | 574.31 | 1130.58 | 565.8  | 1129.6  | 565.3  | 10    |
| 8  | 799.36  | 400.18 | 782.33  | 391.67 | 781.35  | 391.18 | S   | 1019.55 | 510.28 | 1002.53 | 501.77 | 1001.54 | 501.27 | 9     |
| 9  | 898.43  | 449.72 | 881.4   | 441.2  | 880.42  | 440.71 | V   | 932.52  | 466.76 | 915.49  | 458.25 | 914.51  | 457.76 | 8     |
| 10 | 997.49  | 499.25 | 980.47  | 490.74 | 979.48  | 490.25 | V   | 833.45  | 417.23 | 816.42  | 408.72 | 815.44  | 408.22 | 7     |
| 11 | 1126.54 | 563.77 | 1109.51 | 555.26 | 1108.53 | 554.77 | E   | 734.38  | 367.7  | 717.36  | 359.18 | 716.37  | 358.69 | 6     |
| 12 | 1225.61 | 613.31 | 1208.58 | 604.79 | 1207.6  | 604.3  | V   | 605.34  | 303.17 | 588.31  | 294.66 |         |        | 5     |



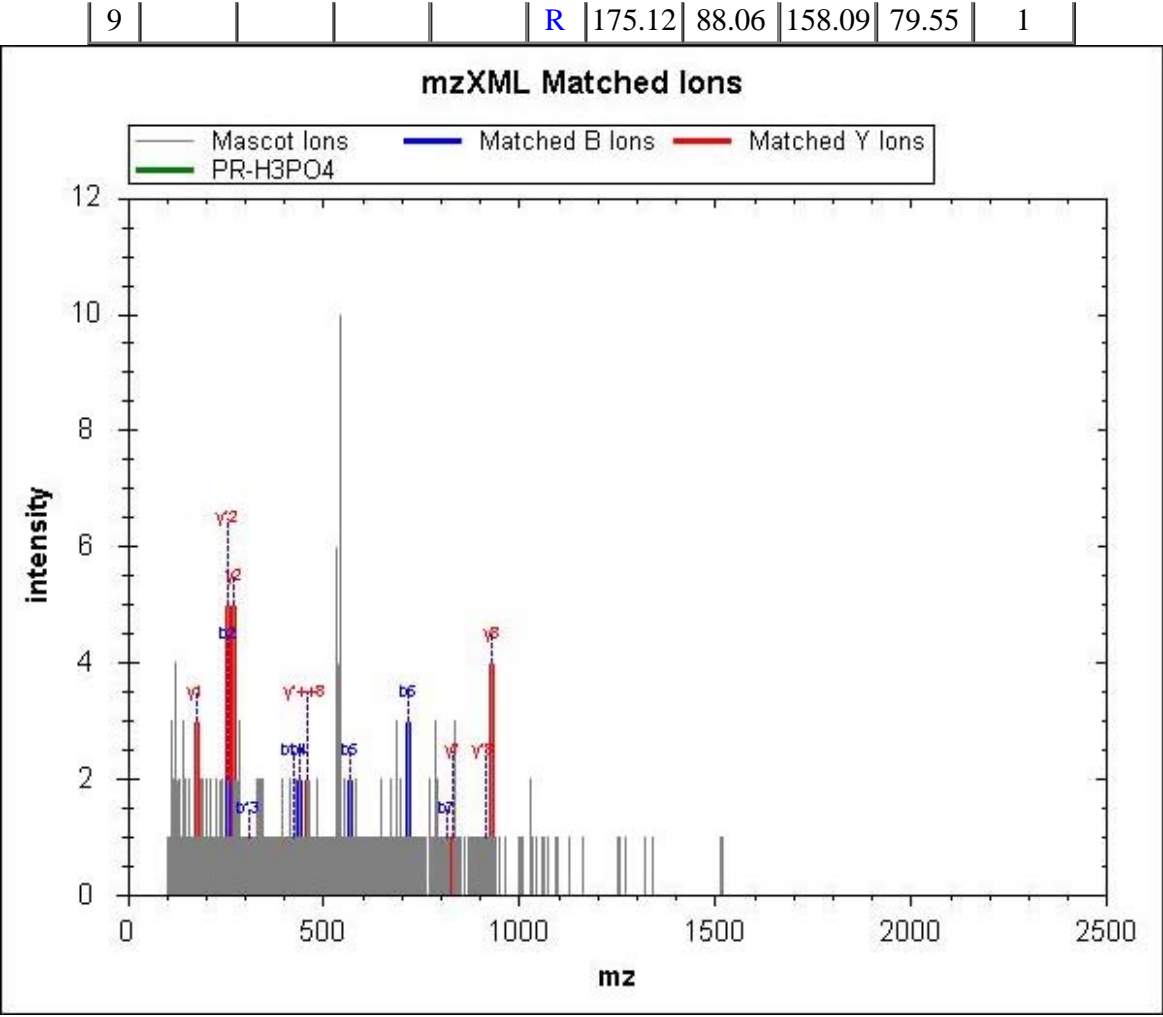

Protein index=1214, ACC No:IP100021978

Peptide index=710 MS/MS spectrum

Sequence: LGNSADALESAK, m/z:588.2968, charge:+ 2, Modification: , Mod Position:

Score: 57.37, Raw data:WET\_A5\_090615\_02.mzxml, MS/MS Elution time: 22.99417, Scan number:1100, Mass delta:-0.004, Rank:1

| No | b       | b++    | b*      | b*++   | b0      | b0++   | Seq | y       | y++    | y*      | y*++   | y0     | y0++   | RevNo |
|----|---------|--------|---------|--------|---------|--------|-----|---------|--------|---------|--------|--------|--------|-------|
| 1  | 114.09  | 57.55  |         |        |         |        | L   |         |        |         |        |        |        | 12    |
| 2  | 171.11  | 86.06  |         |        |         |        | G   | 1062.51 | 531.76 | 1045.48 | 523.24 | 1044.5 | 522.75 | 11    |
| 3  | 285.16  | 143.08 | 268.13  | 134.57 |         |        | N   | 1005.48 | 503.25 | 988.46  | 494.73 | 987.47 | 494.24 | 10    |
| 4  | 372.19  | 186.6  | 355.16  | 178.08 | 354.18  | 177.59 | S   | 891.44  | 446.22 | 874.42  | 437.71 | 873.43 | 437.22 | 9     |
| 5  | 443.22  | 222.12 | 426.2   | 213.6  | 425.21  | 213.11 | A   | 804.41  | 402.71 | 787.38  | 394.2  | 786.4  | 393.7  | 8     |
| 6  | 558.25  | 279.63 | 541.23  | 271.12 | 540.24  | 270.62 | D   | 733.37  | 367.19 | 716.35  | 358.68 | 715.36 | 358.18 | 7     |
| 7  | 629.29  | 315.15 | 612.26  | 306.63 | 611.28  | 306.14 | A   | 618.35  | 309.68 | 601.32  | 301.16 | 600.34 | 300.67 | 6     |
| 8  | 742.37  | 371.69 | 725.35  | 363.18 | 724.36  | 362.68 | L   | 547.31  | 274.16 | 530.28  | 265.64 | 529.3  | 265.15 | 5     |
| 9  | 871.42  | 436.21 | 854.39  | 427.7  | 853.4   | 427.21 | E   | 434.22  | 217.62 | 417.2   | 209.1  | 416.21 | 208.61 | 4     |
| 10 | 958.45  | 479.73 | 941.42  | 471.21 | 940.44  | 470.72 | S   | 305.18  | 153.09 | 288.16  | 144.58 | 287.17 | 144.09 | 3     |
| 11 | 1029.48 | 515.25 | 1012.46 | 506.73 | 1011.47 | 506.24 | A   | 218.15  | 109.58 | 201.12  | 101.07 |        |        | 2     |

|    |  |  |  |  |  |   |        |       |        |       |  |  |   |
|----|--|--|--|--|--|---|--------|-------|--------|-------|--|--|---|
| 12 |  |  |  |  |  | K | 147.11 | 74.06 | 130.09 | 65.55 |  |  | 1 |
|----|--|--|--|--|--|---|--------|-------|--------|-------|--|--|---|

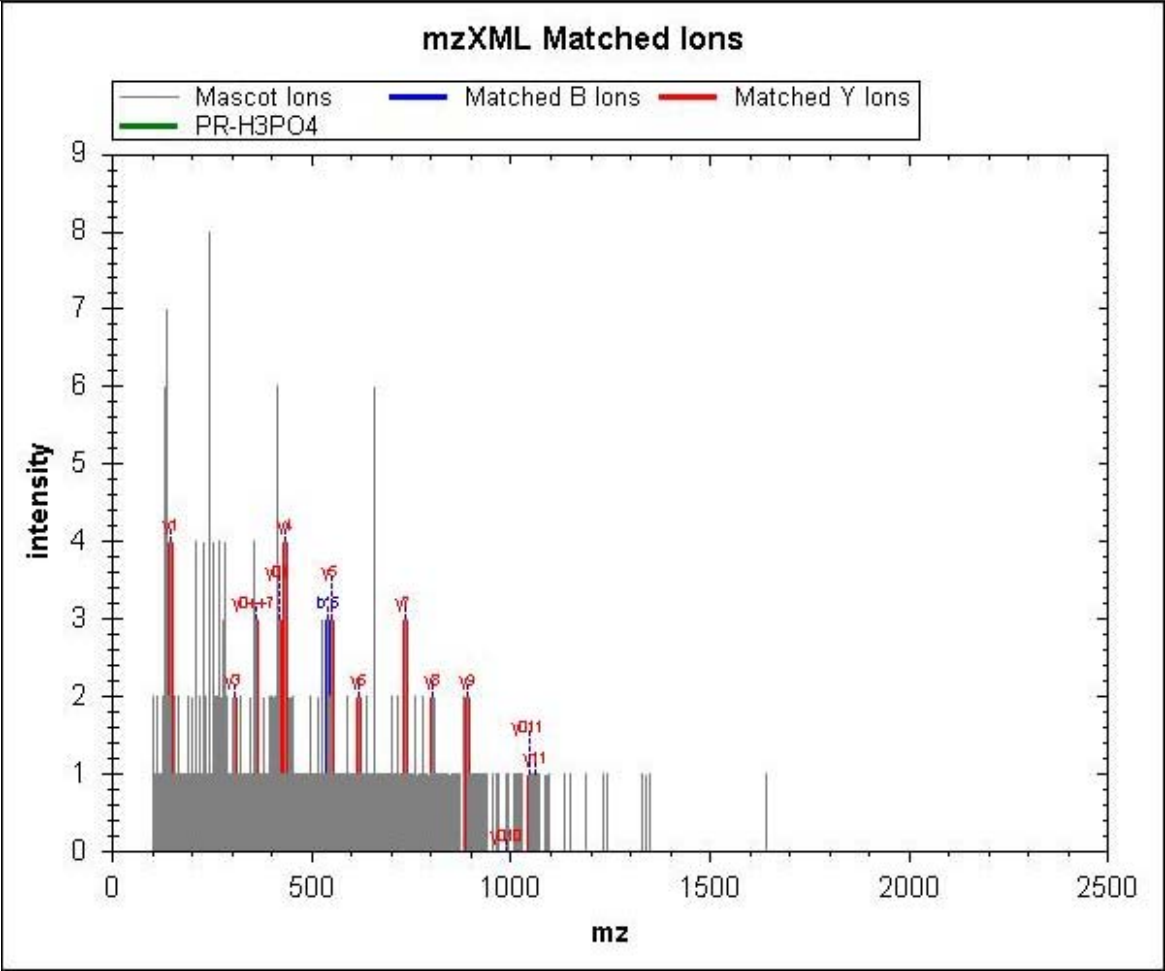

Protein index=1215, ACC No: IPI00012512

Peptide index=1248 MS/MS spectrum

Sequence: LVVVGGGGVGK, m/z:471.2836, charge:+ 2, Modification: , Mod Position:

Score: 49.88, Raw data:WET\_B5\_090616\_01.mzxml, MS/MS Elution time: 31.23, Scan number:1587, Mass delta:-0.0043, Rank:1

| No | b      | b++    | Seq | y      | y++    | y*     | y*++   | RevNo |
|----|--------|--------|-----|--------|--------|--------|--------|-------|
| 1  | 114.09 | 57.55  | L   |        |        |        |        | 11    |
| 2  | 213.16 | 107.08 | V   | 828.49 | 414.75 | 811.47 | 406.24 | 10    |
| 3  | 312.23 | 156.62 | V   | 729.43 | 365.22 | 712.4  | 356.7  | 9     |
| 4  | 411.3  | 206.15 | V   | 630.36 | 315.68 | 613.33 | 307.17 | 8     |
| 5  | 468.32 | 234.66 | G   | 531.29 | 266.15 | 514.26 | 257.63 | 7     |
| 6  | 525.34 | 263.17 | G   | 474.27 | 237.64 | 457.24 | 229.12 | 6     |
| 7  | 582.36 | 291.68 | G   | 417.25 | 209.13 | 400.22 | 200.61 | 5     |
| 8  | 639.38 | 320.19 | G   | 360.22 | 180.62 | 343.2  | 172.1  | 4     |
| 9  | 738.45 | 369.73 | V   | 303.2  | 152.1  | 286.18 | 143.59 | 3     |
| 10 | 795.47 | 398.24 | G   | 204.13 | 102.57 | 187.11 | 94.06  | 2     |
| 11 |        |        | K   | 147.11 | 74.06  | 130.09 | 65.55  | 1     |

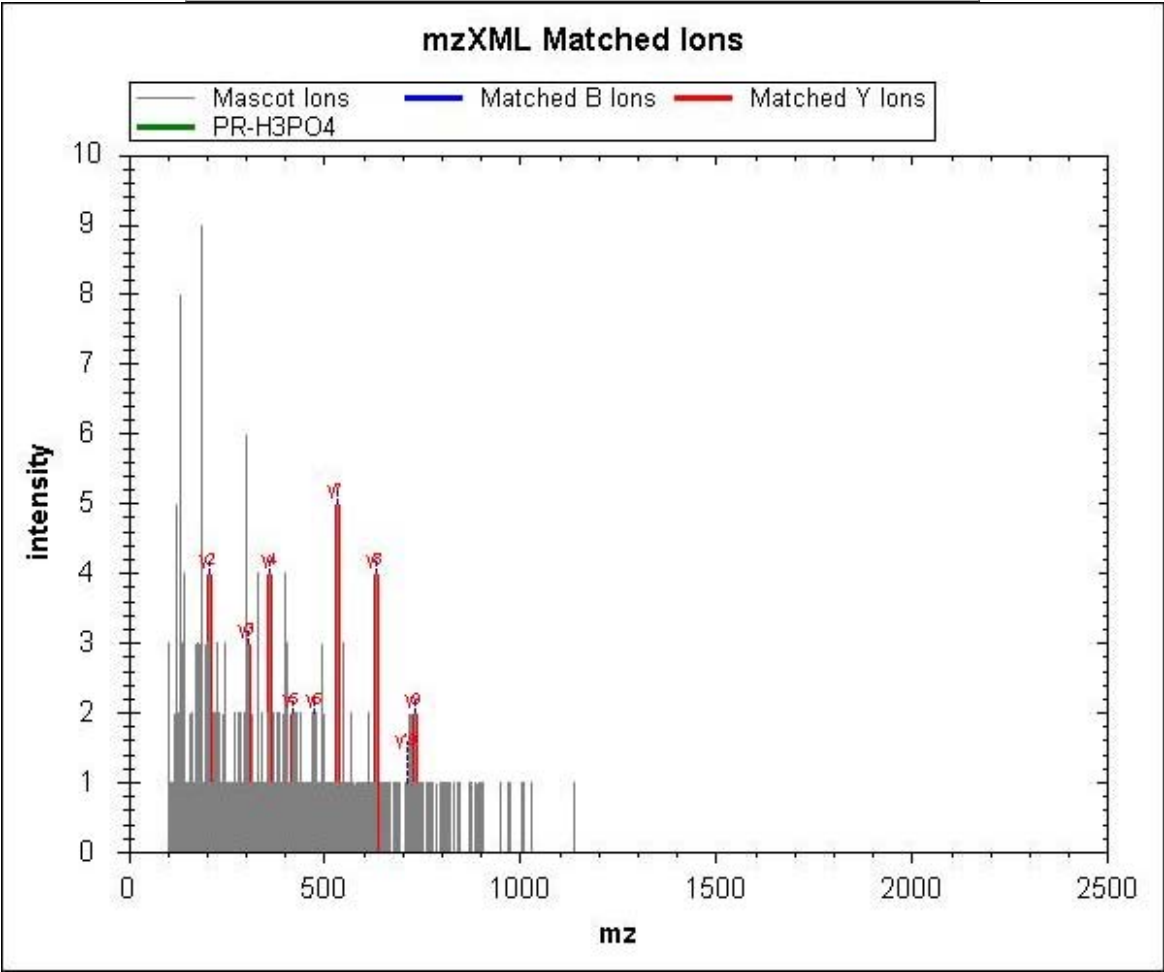

Protein index=1216, ACC No:IPI00005589

Peptide index=579 MS/MS spectrum

Sequence: HMLPSGFR, m/z:480.7393, charge:+ 2, Modification: Oxidation (M), Mod Position: 0.01000000.0

Score: 40.26, Raw data:WET\_A5\_090615\_02.mzxml, MS/MS Elution time: 21.085, Scan number:986, Mass delta:-0.0007, Rank:1

| No | b      | b++    | b0     | b0++   | Seq | y      | y++    | y*     | y*++   | y0     | y0++   | RevNo |
|----|--------|--------|--------|--------|-----|--------|--------|--------|--------|--------|--------|-------|
| 1  | 138.07 | 69.54  |        |        | H   |        |        |        |        |        |        | 8     |
| 2  | 221.1  | 111.06 |        |        | M   | 759.41 | 380.21 | 742.39 | 371.7  | 741.4  | 371.21 | 7     |
| 3  | 334.19 | 167.6  |        |        | L   | 676.38 | 338.69 | 659.35 | 330.18 | 658.37 | 329.69 | 6     |
| 4  | 431.24 | 216.12 |        |        | P   | 563.29 | 282.15 | 546.27 | 273.64 | 545.28 | 273.15 | 5     |
| 5  | 518.27 | 259.64 | 500.26 | 250.63 | S   | 466.24 | 233.62 | 449.21 | 225.11 | 448.23 | 224.62 | 4     |
| 6  | 575.29 | 288.15 | 557.28 | 279.15 | G   | 379.21 | 190.11 | 362.18 | 181.59 |        |        | 3     |
| 7  | 722.36 | 361.68 | 704.35 | 352.68 | F   | 322.19 | 161.6  | 305.16 | 153.08 |        |        | 2     |
| 8  |        |        |        |        | R   | 175.12 | 88.06  | 158.09 | 79.55  |        |        | 1     |

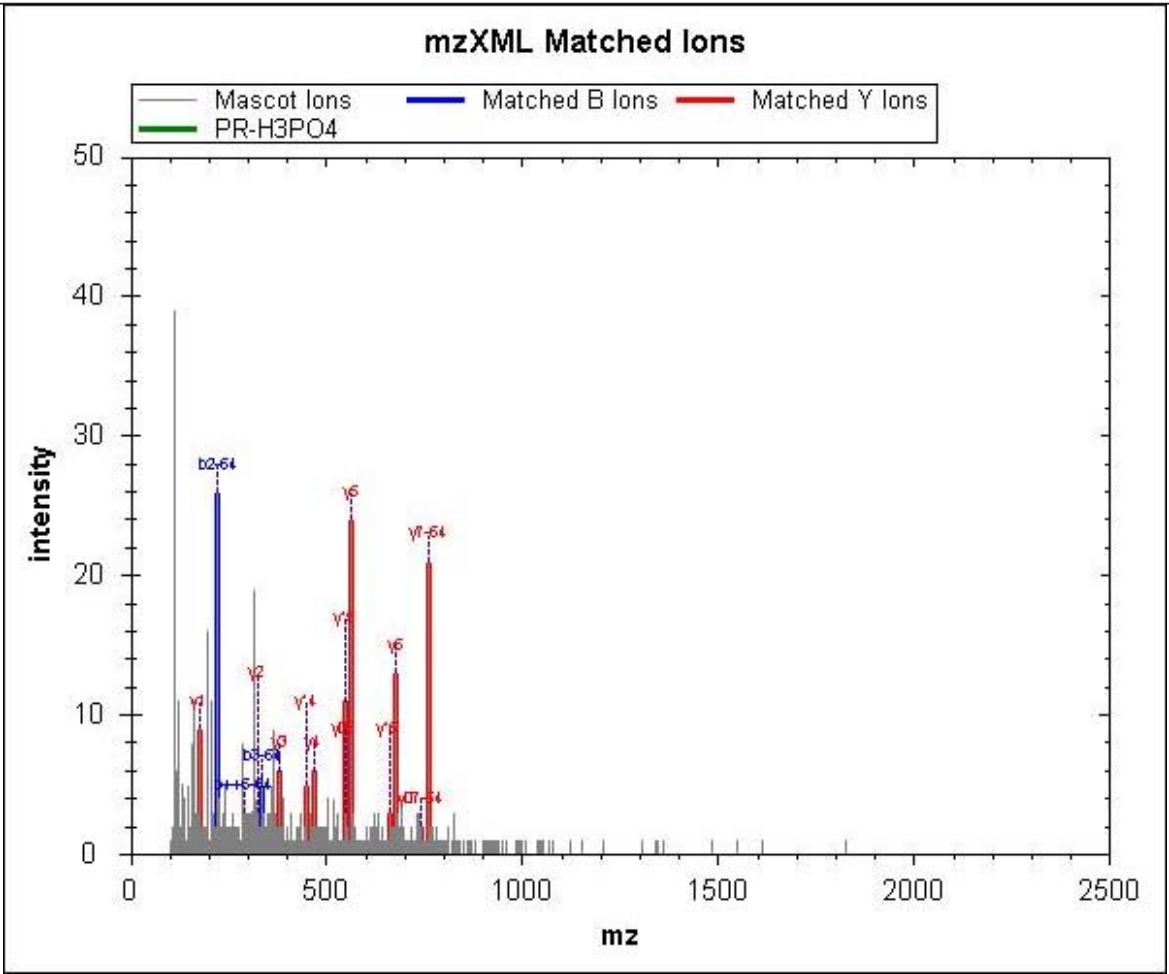

Protein index=1218, ACC No: IPI00021347

Peptide index=6323 MS/MS spectrum

Sequence: TDQVIQSLIALVNDPQPEHPLR, m/z:828.4443, charge:+ 3, Modification: , Mod Position:  
Score: 59.29, Raw data:WET\_A5\_090615\_03.mzxml, MS/MS Elution time: 86.1625, Scan number:4804, Mass delta:0.0016, Rank:1

| No | b       | b++    | b*      | b*++   | b0      | b0++   | Seq | y       | y++     | y*      | y*++    | y0      | y0++    | RevNo |
|----|---------|--------|---------|--------|---------|--------|-----|---------|---------|---------|---------|---------|---------|-------|
| 1  | 102.05  | 51.53  |         |        | 84.04   | 42.53  | T   |         |         |         |         |         |         | 22    |
| 2  | 217.08  | 109.04 |         |        | 199.07  | 100.04 | D   | 2382.28 | 1191.64 | 2365.25 | 1183.13 | 2364.27 | 1182.64 | 21    |
| 3  | 345.14  | 173.07 | 328.11  | 164.56 | 327.13  | 164.07 | Q   | 2267.25 | 1134.13 | 2250.22 | 1125.62 | 2249.24 | 1125.12 | 20    |
| 4  | 444.21  | 222.61 | 427.18  | 214.09 | 426.2   | 213.6  | V   | 2139.19 | 1070.1  | 2122.17 | 1061.59 | 2121.18 | 1061.09 | 19    |
| 5  | 557.29  | 279.15 | 540.27  | 270.64 | 539.28  | 270.14 | I   | 2040.12 | 1020.57 | 2023.1  | 1012.05 | 2022.11 | 1011.56 | 18    |
| 6  | 685.35  | 343.18 | 668.32  | 334.67 | 667.34  | 334.17 | Q   | 1927.04 | 964.02  | 1910.01 | 955.51  | 1909.03 | 955.02  | 17    |
| 7  | 772.38  | 386.7  | 755.36  | 378.18 | 754.37  | 377.69 | S   | 1798.98 | 899.99  | 1781.95 | 891.48  | 1780.97 | 890.99  | 16    |
| 8  | 885.47  | 443.24 | 868.44  | 434.72 | 867.46  | 434.23 | L   | 1711.95 | 856.48  | 1694.92 | 847.96  | 1693.94 | 847.47  | 15    |
| 9  | 998.55  | 499.78 | 981.53  | 491.27 | 980.54  | 490.77 | I   | 1598.86 | 799.94  | 1581.84 | 791.42  | 1580.85 | 790.93  | 14    |
| 10 | 1069.59 | 535.3  | 1052.56 | 526.78 | 1051.58 | 526.29 | A   | 1485.78 | 743.39  | 1468.75 | 734.88  | 1467.77 | 734.39  | 13    |
| 11 | 1182.67 | 591.84 | 1165.65 | 583.33 | 1164.66 | 582.83 | L   | 1414.74 | 707.88  | 1397.72 | 699.36  | 1396.73 | 698.87  | 12    |
| 12 | 1281.74 | 641.37 | 1264.71 | 632.86 | 1263.73 | 632.37 | V   | 1301.66 | 651.33  | 1284.63 | 642.82  | 1283.65 | 642.33  | 11    |

|    |         |         |         |         |         |         |   |         |        |         |        |         |        |    |
|----|---------|---------|---------|---------|---------|---------|---|---------|--------|---------|--------|---------|--------|----|
| 13 | 1395.78 | 698.4   | 1378.76 | 689.88  | 1377.77 | 689.39  | N | 1202.59 | 601.8  | 1185.56 | 593.29 | 1184.58 | 592.79 | 10 |
| 14 | 1510.81 | 755.91  | 1493.78 | 747.4   | 1492.8  | 746.9   | D | 1088.55 | 544.78 | 1071.52 | 536.26 | 1070.54 | 535.77 | 9  |
| 15 | 1607.86 | 804.44  | 1590.84 | 795.92  | 1589.85 | 795.43  | P | 973.52  | 487.26 | 956.49  | 478.75 | 955.51  | 478.26 | 8  |
| 16 | 1735.92 | 868.46  | 1718.9  | 859.95  | 1717.91 | 859.46  | Q | 876.47  | 438.74 | 859.44  | 430.22 | 858.46  | 429.73 | 7  |
| 17 | 1832.98 | 916.99  | 1815.95 | 908.48  | 1814.96 | 907.99  | P | 748.41  | 374.71 | 731.38  | 366.2  | 730.4   | 365.7  | 6  |
| 18 | 1962.02 | 981.51  | 1944.99 | 973     | 1944.01 | 972.51  | E | 651.36  | 326.18 | 634.33  | 317.67 | 633.35  | 317.18 | 5  |
| 19 | 2099.08 | 1050.04 | 2082.05 | 1041.53 | 2081.07 | 1041.04 | H | 522.31  | 261.66 | 505.29  | 253.15 |         |        | 4  |
| 20 | 2196.13 | 1098.57 | 2179.1  | 1090.06 | 2178.12 | 1089.56 | P | 385.26  | 193.13 | 368.23  | 184.62 |         |        | 3  |
| 21 | 2309.21 | 1155.11 | 2292.19 | 1146.6  | 2291.2  | 1146.11 | L | 288.2   | 144.61 | 271.18  | 136.09 |         |        | 2  |
| 22 |         |         |         |         |         |         | R | 175.12  | 88.06  | 158.09  | 79.55  |         |        | 1  |

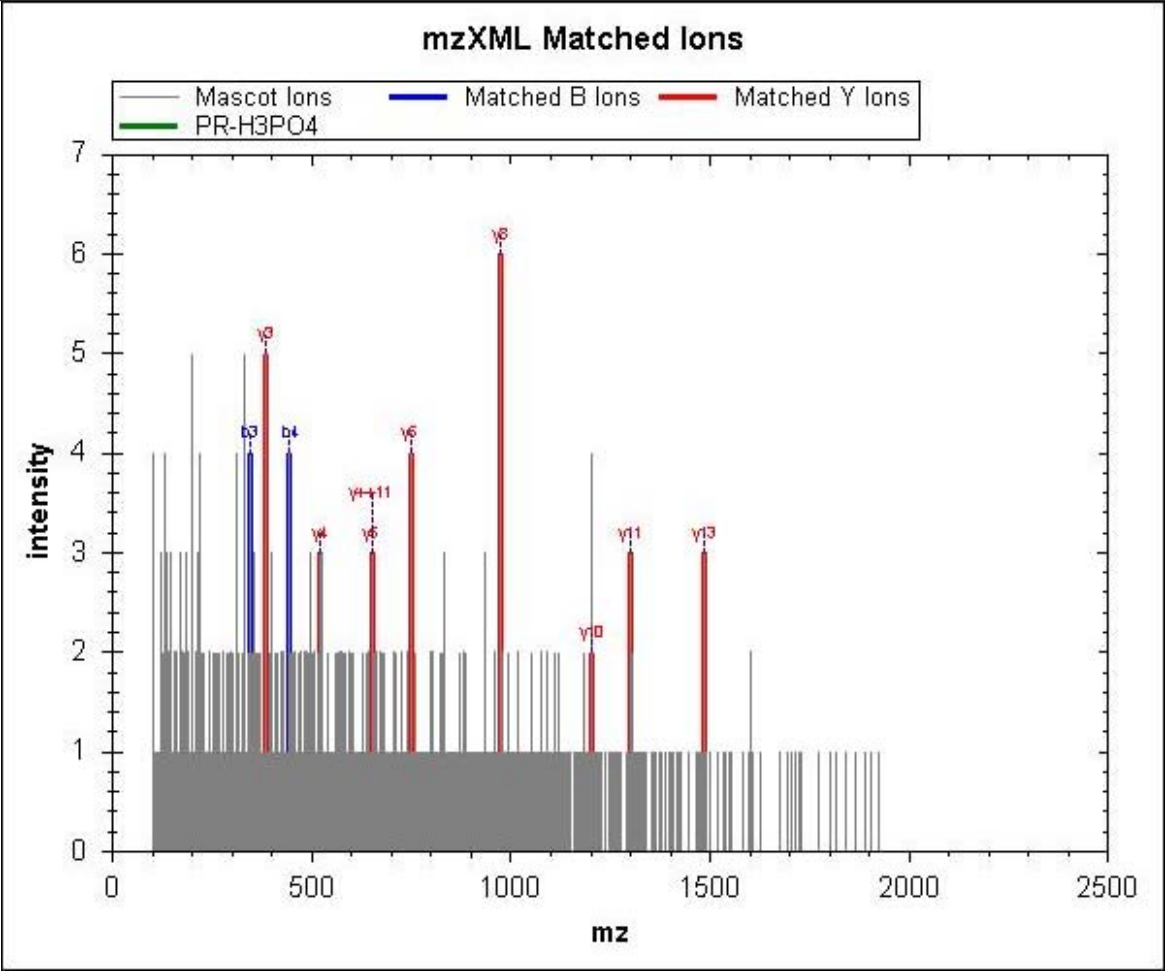

Protein index=1220, ACC No:IP100553162

Peptide index=1024 MS/MS spectrum

Sequence: RKVEVVTR, m/z:493.7732, charge:+ 2, Modification: , Mod Position:

Score: 51.67, Raw data:WET\_A5\_090615\_02.mzxml, MS/MS Elution time: 28.362, Scan number:1417, Mass delta:-0.0715, Rank:1

| No | b      | b++    | b*     | b*++   | b0 | b0++ | Seq | y      | y++    | y*     | y*++   | y0    | y0++   | RevNo |
|----|--------|--------|--------|--------|----|------|-----|--------|--------|--------|--------|-------|--------|-------|
| 1  | 157.11 | 79.06  | 140.08 | 70.54  |    |      | R   |        |        |        |        |       |        | 8     |
| 2  | 285.2  | 143.11 | 268.18 | 134.59 |    |      | K   | 830.51 | 415.76 | 813.48 | 407.25 | 812.5 | 406.75 | 7     |

|   |        |        |        |        |        |        |   |        |        |        |        |        |        |   |
|---|--------|--------|--------|--------|--------|--------|---|--------|--------|--------|--------|--------|--------|---|
| 3 | 384.27 | 192.64 | 367.25 | 184.13 |        |        | V | 702.41 | 351.71 | 685.39 | 343.2  | 684.4  | 342.71 | 6 |
| 4 | 513.31 | 257.16 | 496.29 | 248.65 | 495.3  | 248.16 | E | 603.35 | 302.18 | 586.32 | 293.66 | 585.34 | 293.17 | 5 |
| 5 | 612.38 | 306.7  | 595.36 | 298.18 | 594.37 | 297.69 | V | 474.3  | 237.66 | 457.28 | 229.14 | 456.29 | 228.65 | 4 |
| 6 | 711.45 | 356.23 | 694.42 | 347.72 | 693.44 | 347.22 | V | 375.24 | 188.12 | 358.21 | 179.61 | 357.22 | 179.12 | 3 |
| 7 | 812.5  | 406.75 | 795.47 | 398.24 | 794.49 | 397.75 | T | 276.17 | 138.59 | 259.14 | 130.07 | 258.16 | 129.58 | 2 |
| 8 |        |        |        |        |        |        | R | 175.12 | 88.06  | 158.09 | 79.55  |        |        | 1 |

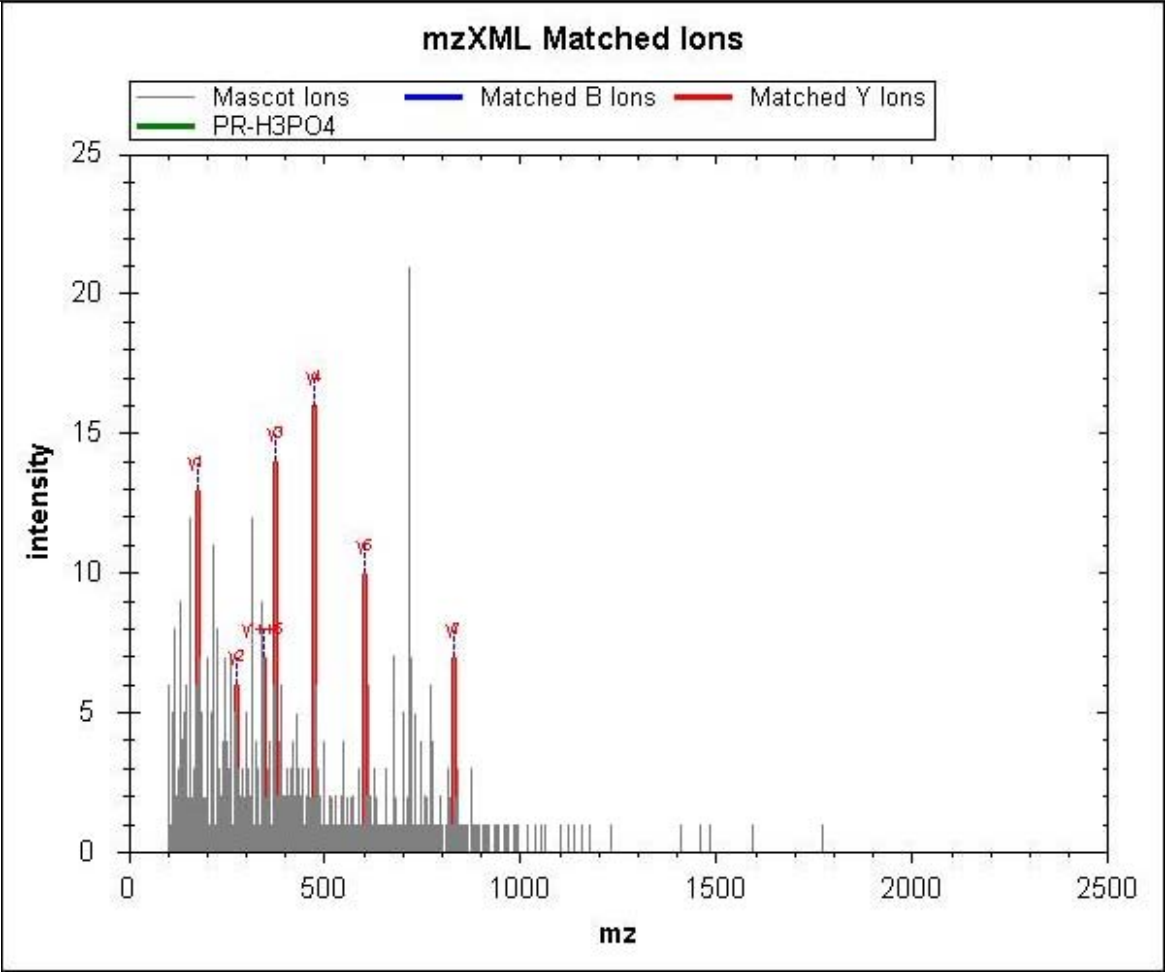

Protein index=1222, ACC No:IP100099871

Peptide index=6427 MS/MS spectrum

Sequence: ATQELIPIEDFITPLK, m/z:914.5089, charge:+ 2, Modification: , Mod Position:

Score: 45.49, Raw data:WET\_A5\_090615\_02.mzxml, MS/MS Elution time: 87.93716, Scan number:4906, Mass delta:0.0002, Rank:1

| No | b      | b++    | b*     | b*++   | b0     | b0++   | Seq | y       | y++    | y*      | y*++   | y0      | y0++   | RevNo |
|----|--------|--------|--------|--------|--------|--------|-----|---------|--------|---------|--------|---------|--------|-------|
| 1  | 72.04  | 36.53  |        |        |        |        | A   |         |        |         |        |         |        | 16    |
| 2  | 173.09 | 87.05  |        |        | 155.08 | 78.04  | T   | 1756.97 | 878.99 | 1739.95 | 870.48 | 1738.96 | 869.98 | 15    |
| 3  | 301.15 | 151.08 | 284.12 | 142.57 | 283.14 | 142.07 | Q   | 1655.93 | 828.47 | 1638.9  | 819.95 | 1637.91 | 819.46 | 14    |
| 4  | 430.19 | 215.6  | 413.17 | 207.09 | 412.18 | 206.59 | E   | 1527.87 | 764.44 | 1510.84 | 755.92 | 1509.86 | 755.43 | 13    |
| 5  | 543.28 | 272.14 | 526.25 | 263.63 | 525.27 | 263.14 | L   | 1398.82 | 699.92 | 1381.8  | 691.4  | 1380.81 | 690.91 | 12    |
| 6  | 656.36 | 328.68 | 639.33 | 320.17 | 638.35 | 319.68 | I   | 1285.74 | 643.37 | 1268.71 | 634.86 | 1267.73 | 634.37 | 11    |

|    |         |        |         |        |         |        |   |         |        |         |        |         |        |    |
|----|---------|--------|---------|--------|---------|--------|---|---------|--------|---------|--------|---------|--------|----|
| 7  | 753.41  | 377.21 | 736.39  | 368.7  | 735.4   | 368.21 | P | 1172.66 | 586.83 | 1155.63 | 578.32 | 1154.65 | 577.83 | 10 |
| 8  | 866.5   | 433.75 | 849.47  | 425.24 | 848.49  | 424.75 | I | 1075.6  | 538.31 | 1058.58 | 529.79 | 1057.59 | 529.3  | 9  |
| 9  | 995.54  | 498.27 | 978.51  | 489.76 | 977.53  | 489.27 | E | 962.52  | 481.76 | 945.49  | 473.25 | 944.51  | 472.76 | 8  |
| 10 | 1110.57 | 555.79 | 1093.54 | 547.27 | 1092.56 | 546.78 | D | 833.48  | 417.24 | 816.45  | 408.73 | 815.47  | 408.24 | 7  |
| 11 | 1257.64 | 629.32 | 1240.61 | 620.81 | 1239.63 | 620.32 | F | 718.45  | 359.73 | 701.42  | 351.22 | 700.44  | 350.72 | 6  |
| 12 | 1370.72 | 685.86 | 1353.69 | 677.35 | 1352.71 | 676.86 | I | 571.38  | 286.19 | 554.35  | 277.68 | 553.37  | 277.19 | 5  |
| 13 | 1471.77 | 736.39 | 1454.74 | 727.87 | 1453.76 | 727.38 | T | 458.3   | 229.65 | 441.27  | 221.14 | 440.29  | 220.65 | 4  |
| 14 | 1568.82 | 784.91 | 1551.79 | 776.4  | 1550.81 | 775.91 | P | 357.25  | 179.13 | 340.22  | 170.62 |         |        | 3  |
| 15 | 1681.9  | 841.46 | 1664.88 | 832.94 | 1663.89 | 832.45 | L | 260.2   | 130.6  | 243.17  | 122.09 |         |        | 2  |
| 16 |         |        |         |        |         |        | K | 147.11  | 74.06  | 130.09  | 65.55  |         |        | 1  |

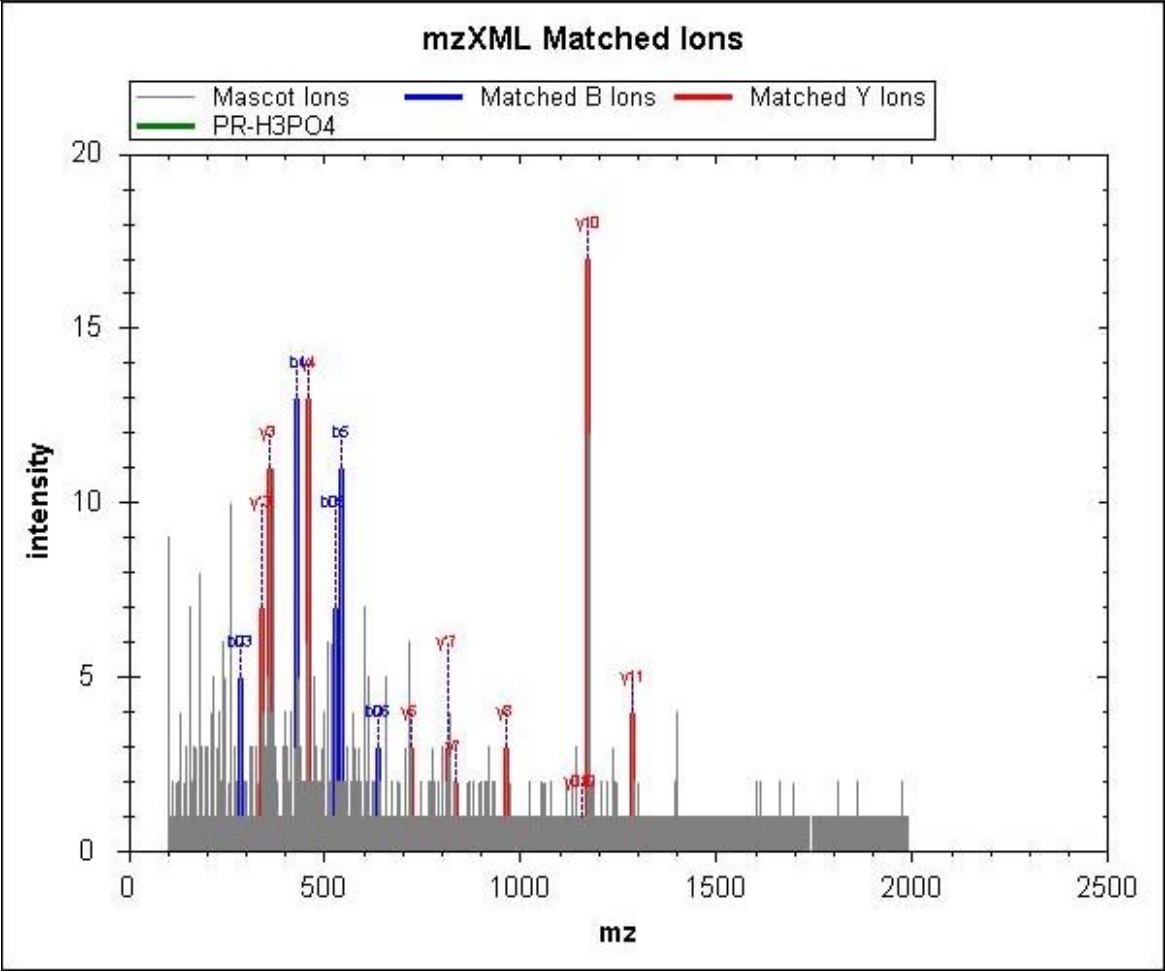

Protein index=1223, ACC No:IP100440828

Peptide index=4811 MS/MS spectrum

Sequence: IITLEEGDIILTGTPK, m/z:856.9867, charge:+ 2, Modification: , Mod Position:

Score: 78.92, Raw data:WET\_B5\_090616\_02.mzxml, MS/MS Elution time: 65.96933, Scan number:3631, Mass delta:-0.0126, Rank:1

| No | b      | b++    | b0 | b0++ | Seq | y       | y++    | y*      | y*++   | y0      | y0++   | RevNo |
|----|--------|--------|----|------|-----|---------|--------|---------|--------|---------|--------|-------|
| 1  | 114.09 | 57.55  |    |      | I   |         |        |         |        |         |        | 16    |
| 2  | 227.18 | 114.09 |    |      | I   | 1599.88 | 800.45 | 1582.86 | 791.93 | 1581.87 | 791.44 | 15    |

|    |         |        |         |        |   |         |        |         |        |         |        |    |
|----|---------|--------|---------|--------|---|---------|--------|---------|--------|---------|--------|----|
| 3  | 328.22  | 164.62 | 310.21  | 155.61 | T | 1486.8  | 743.9  | 1469.77 | 735.39 | 1468.79 | 734.9  | 14 |
| 4  | 441.31  | 221.16 | 423.3   | 212.15 | L | 1385.75 | 693.38 | 1368.73 | 684.87 | 1367.74 | 684.37 | 13 |
| 5  | 570.35  | 285.68 | 552.34  | 276.67 | E | 1272.67 | 636.84 | 1255.64 | 628.32 | 1254.66 | 627.83 | 12 |
| 6  | 699.39  | 350.2  | 681.38  | 341.19 | E | 1143.63 | 572.32 | 1126.6  | 563.8  | 1125.61 | 563.31 | 11 |
| 7  | 756.41  | 378.71 | 738.4   | 369.71 | G | 1014.58 | 507.8  | 997.56  | 499.28 | 996.57  | 498.79 | 10 |
| 8  | 871.44  | 436.22 | 853.43  | 427.22 | D | 957.56  | 479.28 | 940.53  | 470.77 | 939.55  | 470.28 | 9  |
| 9  | 984.52  | 492.77 | 966.51  | 483.76 | I | 842.53  | 421.77 | 825.51  | 413.26 | 824.52  | 412.77 | 8  |
| 10 | 1097.61 | 549.31 | 1079.6  | 540.3  | I | 729.45  | 365.23 | 712.42  | 356.72 | 711.44  | 356.22 | 7  |
| 11 | 1210.69 | 605.85 | 1192.68 | 596.84 | L | 616.37  | 308.69 | 599.34  | 300.17 | 598.36  | 299.68 | 6  |
| 12 | 1311.74 | 656.37 | 1293.73 | 647.37 | T | 503.28  | 252.14 | 486.26  | 243.63 | 485.27  | 243.14 | 5  |
| 13 | 1368.76 | 684.88 | 1350.75 | 675.88 | G | 402.23  | 201.62 | 385.21  | 193.11 | 384.22  | 192.62 | 4  |
| 14 | 1469.81 | 735.41 | 1451.8  | 726.4  | T | 345.21  | 173.11 | 328.19  | 164.6  | 327.2   | 164.1  | 3  |
| 15 | 1566.86 | 783.93 | 1548.85 | 774.93 | P | 244.17  | 122.59 | 227.14  | 114.07 |         |        | 2  |
| 16 |         |        |         |        | K | 147.11  | 74.06  | 130.09  | 65.55  |         |        | 1  |

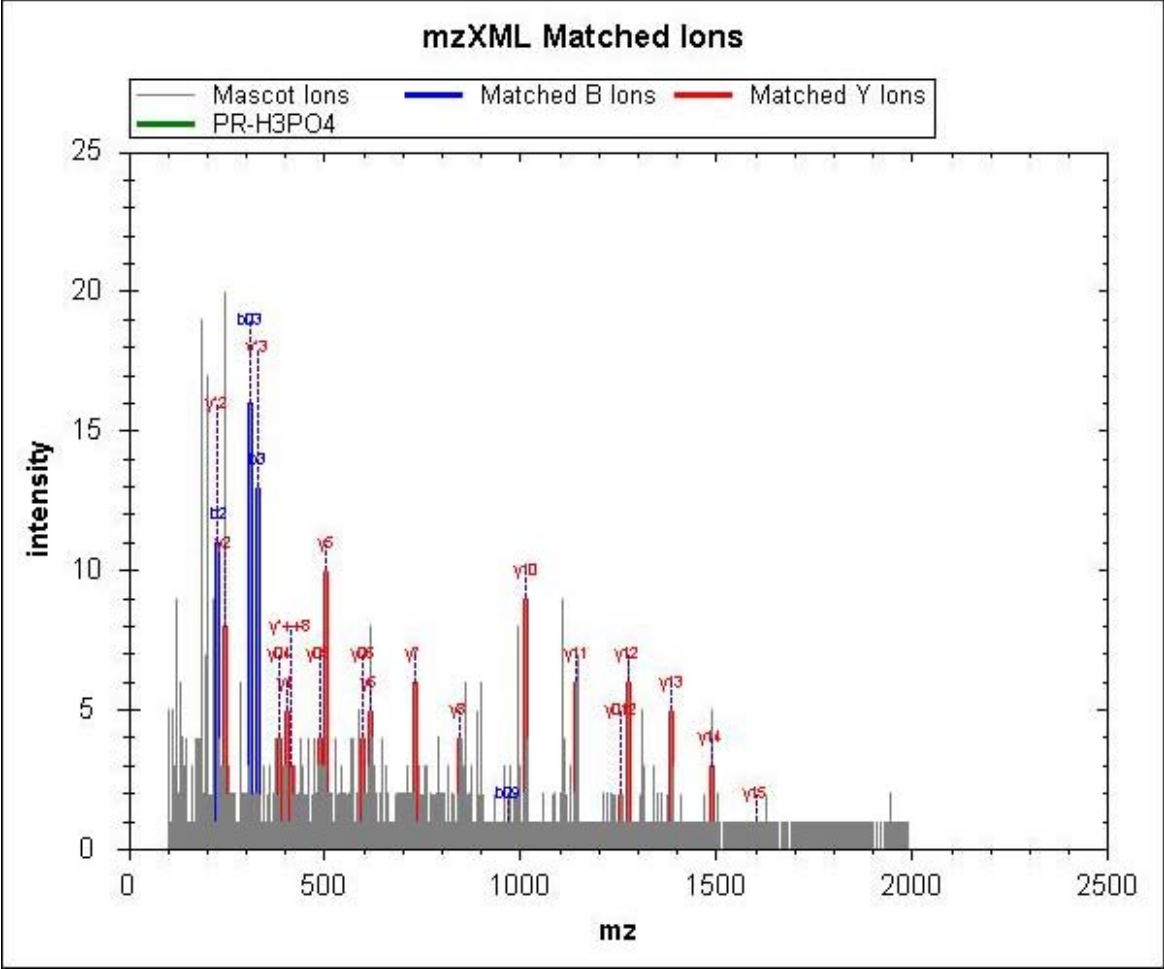

Protein index=1224, ACC No:IP100012200

Peptide index=3360 MS/MS spectrum

Sequence: VVGAVIDQGLITR, m/z:670.8958, charge:+ 2, Modification: , Mod Position:

Score: 80.23, Raw data:WET\_B5\_090616\_01.mzxml, MS/MS Elution time: 51.86983, Scan number:2786, Mass delta:-0.0059, Rank:1

| No | b       | b++    | b*      | b*++   | b0      | b0++   | Seq | y       | y++    | y*      | y*++   | y0      | y0++   | RevNo |
|----|---------|--------|---------|--------|---------|--------|-----|---------|--------|---------|--------|---------|--------|-------|
| 1  | 100.08  | 50.54  |         |        |         |        | V   |         |        |         |        |         |        | 13    |
| 2  | 199.14  | 100.08 |         |        |         |        | V   | 1241.72 | 621.36 | 1224.69 | 612.85 | 1223.71 | 612.36 | 12    |
| 3  | 256.17  | 128.59 |         |        |         |        | G   | 1142.65 | 571.83 | 1125.63 | 563.32 | 1124.64 | 562.82 | 11    |
| 4  | 327.2   | 164.1  |         |        |         |        | A   | 1085.63 | 543.32 | 1068.6  | 534.81 | 1067.62 | 534.31 | 10    |
| 5  | 426.27  | 213.64 |         |        |         |        | V   | 1014.59 | 507.8  | 997.57  | 499.29 | 996.58  | 498.8  | 9     |
| 6  | 539.36  | 270.18 |         |        |         |        | I   | 915.53  | 458.27 | 898.5   | 449.75 | 897.52  | 449.26 | 8     |
| 7  | 654.38  | 327.69 |         |        | 636.37  | 318.69 | D   | 802.44  | 401.72 | 785.42  | 393.21 | 784.43  | 392.72 | 7     |
| 8  | 782.44  | 391.72 | 765.41  | 383.21 | 764.43  | 382.72 | Q   | 687.41  | 344.21 | 670.39  | 335.7  | 669.4   | 335.21 | 6     |
| 9  | 839.46  | 420.23 | 822.44  | 411.72 | 821.45  | 411.23 | G   | 559.36  | 280.18 | 542.33  | 271.67 | 541.35  | 271.18 | 5     |
| 10 | 952.55  | 476.78 | 935.52  | 468.26 | 934.54  | 467.77 | L   | 502.33  | 251.67 | 485.31  | 243.16 | 484.32  | 242.67 | 4     |
| 11 | 1065.63 | 533.32 | 1048.6  | 524.81 | 1047.62 | 524.31 | I   | 389.25  | 195.13 | 372.22  | 186.62 | 371.24  | 186.12 | 3     |
| 12 | 1166.68 | 583.84 | 1149.65 | 575.33 | 1148.67 | 574.84 | T   | 276.17  | 138.59 | 259.14  | 130.07 | 258.16  | 129.58 | 2     |
| 13 |         |        |         |        |         |        | R   | 175.12  | 88.06  | 158.09  | 79.55  |         |        | 1     |

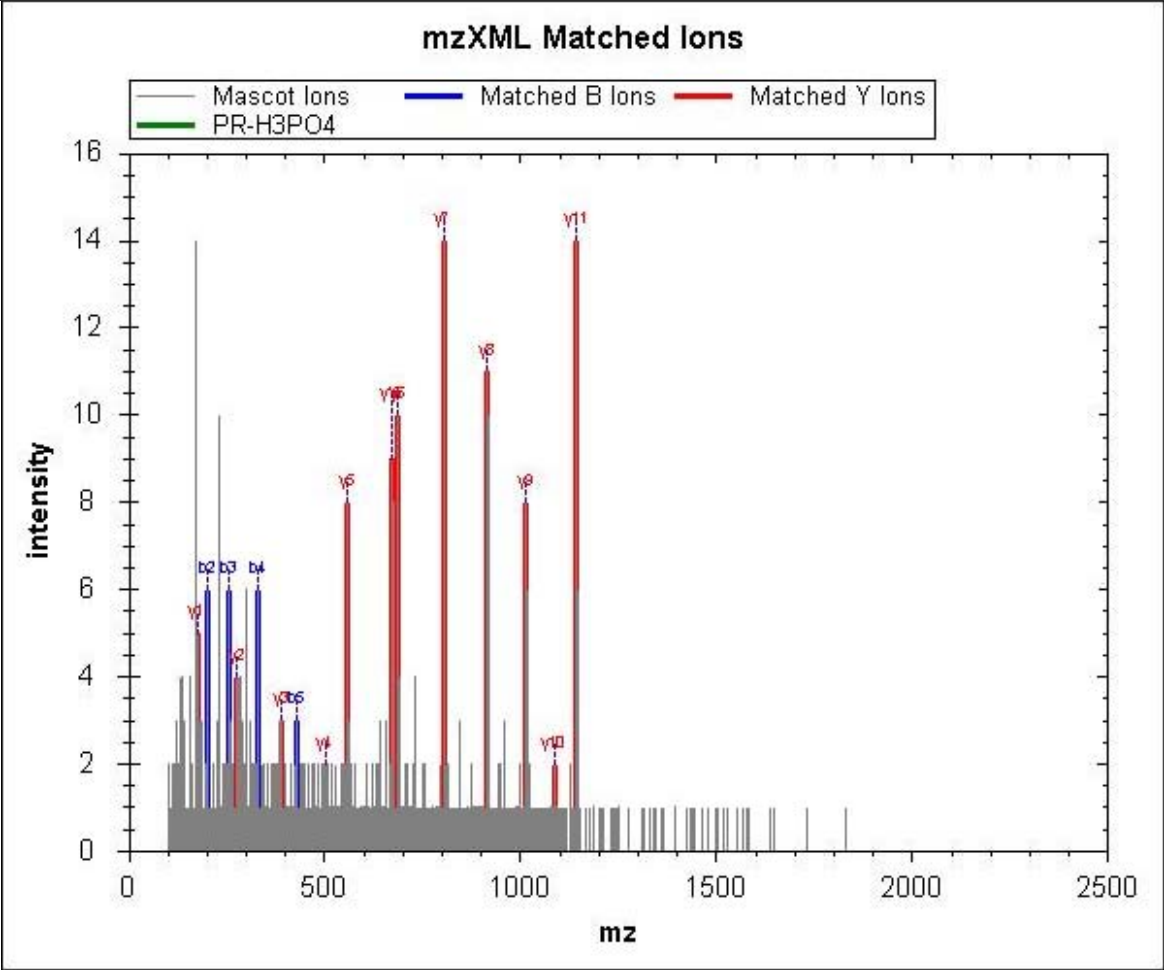

Protein index=1225, ACC No: IPI00030906

Peptide index=2585 MS/MS spectrum

Sequence: MGIHIPDR, m/z:469.7902, charge:+ 2, Modification: , Mod Position:

Score: 41.34, Raw data:WET\_A5\_090615\_03.mzxml, MS/MS Elution time: 45.385, Scan number:2416,

Mass delta:0.0914, Rank:1

| No | b      | b++    | b0     | b0++   | Seq | y      | y++    | y*     | y*++   | y0     | y0++   | RevNo |
|----|--------|--------|--------|--------|-----|--------|--------|--------|--------|--------|--------|-------|
| 1  | 132.05 | 66.53  |        |        | M   |        |        |        |        |        |        | 8     |
| 2  | 189.07 | 95.04  |        |        | G   | 807.45 | 404.23 | 790.42 | 395.71 | 789.44 | 395.22 | 7     |
| 3  | 302.15 | 151.58 |        |        | I   | 750.43 | 375.72 | 733.4  | 367.2  | 732.42 | 366.71 | 6     |
| 4  | 439.21 | 220.11 |        |        | H   | 637.34 | 319.17 | 620.32 | 310.66 | 619.33 | 310.17 | 5     |
| 5  | 552.3  | 276.65 |        |        | I   | 500.28 | 250.65 | 483.26 | 242.13 | 482.27 | 241.64 | 4     |
| 6  | 649.35 | 325.18 |        |        | P   | 387.2  | 194.1  | 370.17 | 185.59 | 369.19 | 185.1  | 3     |
| 7  | 764.38 | 382.69 | 746.37 | 373.69 | D   | 290.15 | 145.58 | 273.12 | 137.06 | 272.14 | 136.57 | 2     |
| 8  |        |        |        |        | R   | 175.12 | 88.06  | 158.09 | 79.55  |        |        | 1     |

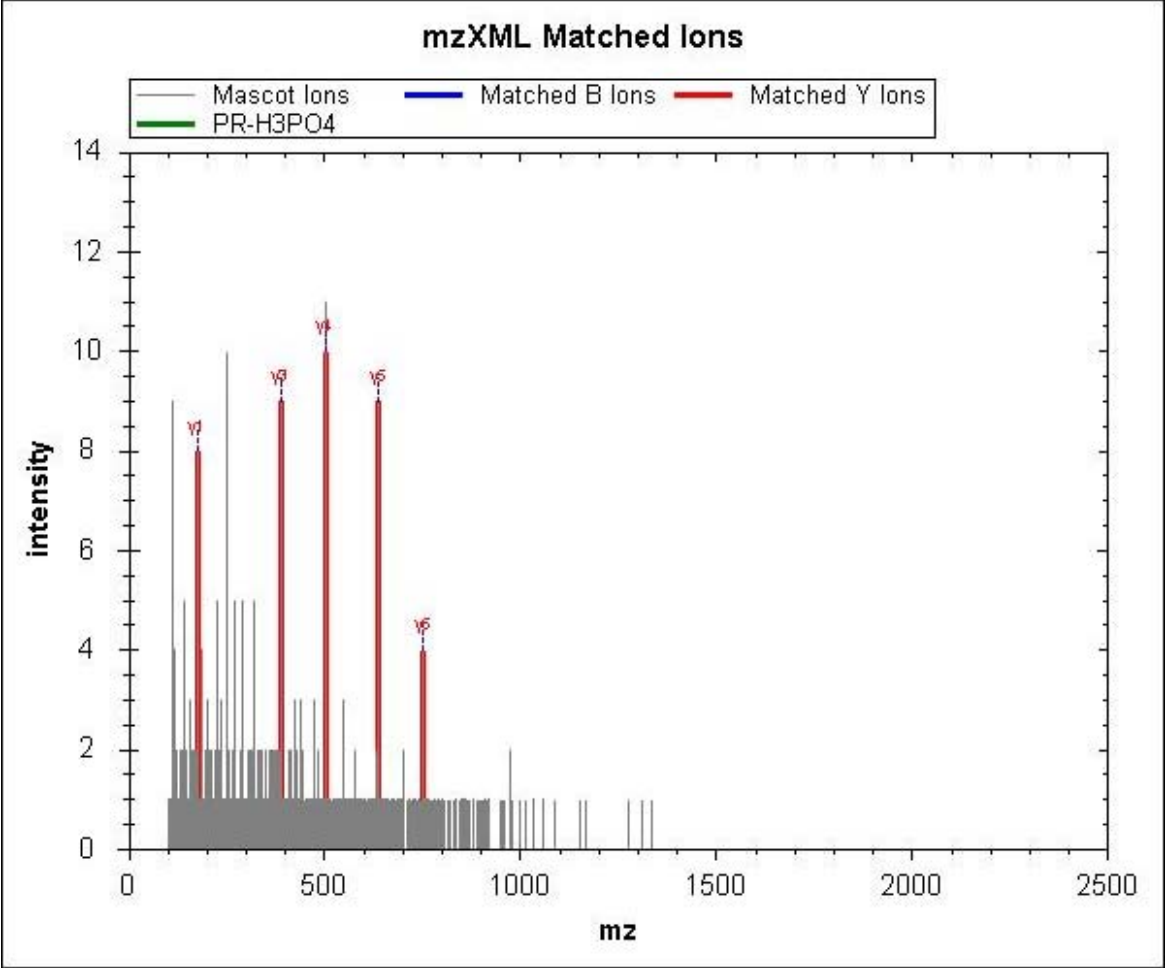

Protein index=1226, ACC No: IPI00465034

Peptide index=5684 MS/MS spectrum

Sequence: QRAQVSASTR, m/z:552.3288, charge:+ 2, Modification: , Mod Position:

Score: 36.63, Raw data:WET\_A5\_090615\_02.mzxml, MS/MS Elution time: 76.85484, Scan number:4257, Mass delta:0.0588, Rank:1

| No | b      | b++   | b*     | b*++  | b0 | b0++ | Seq | y | y++ | y* | y*++ | y0 | y0++ | RevNo |
|----|--------|-------|--------|-------|----|------|-----|---|-----|----|------|----|------|-------|
| 1  | 129.07 | 65.04 | 112.04 | 56.52 |    |      | Q   |   |     |    |      |    |      | 10    |

|    |        |        |        |        |        |        |   |        |        |        |        |        |        |   |
|----|--------|--------|--------|--------|--------|--------|---|--------|--------|--------|--------|--------|--------|---|
| 2  | 285.17 | 143.09 | 268.14 | 134.57 |        |        | R | 975.53 | 488.27 | 958.51 | 479.76 | 957.52 | 479.26 | 9 |
| 3  | 356.2  | 178.61 | 339.18 | 170.09 |        |        | A | 819.43 | 410.22 | 802.41 | 401.71 | 801.42 | 401.21 | 8 |
| 4  | 484.26 | 242.63 | 467.24 | 234.12 |        |        | Q | 748.39 | 374.7  | 731.37 | 366.19 | 730.38 | 365.7  | 7 |
| 5  | 583.33 | 292.17 | 566.3  | 283.66 |        |        | V | 620.34 | 310.67 | 603.31 | 302.16 | 602.33 | 301.67 | 6 |
| 6  | 670.36 | 335.69 | 653.34 | 327.17 | 652.35 | 326.68 | S | 521.27 | 261.14 | 504.24 | 252.62 | 503.26 | 252.13 | 5 |
| 7  | 741.4  | 371.2  | 724.37 | 362.69 | 723.39 | 362.2  | A | 434.24 | 217.62 | 417.21 | 209.11 | 416.23 | 208.62 | 4 |
| 8  | 828.43 | 414.72 | 811.41 | 406.21 | 810.42 | 405.71 | S | 363.2  | 182.1  | 346.17 | 173.59 | 345.19 | 173.1  | 3 |
| 9  | 929.48 | 465.24 | 912.45 | 456.73 | 911.47 | 456.24 | T | 276.17 | 138.59 | 259.14 | 130.07 | 258.16 | 129.58 | 2 |
| 10 |        |        |        |        |        |        | R | 175.12 | 88.06  | 158.09 | 79.55  |        |        | 1 |

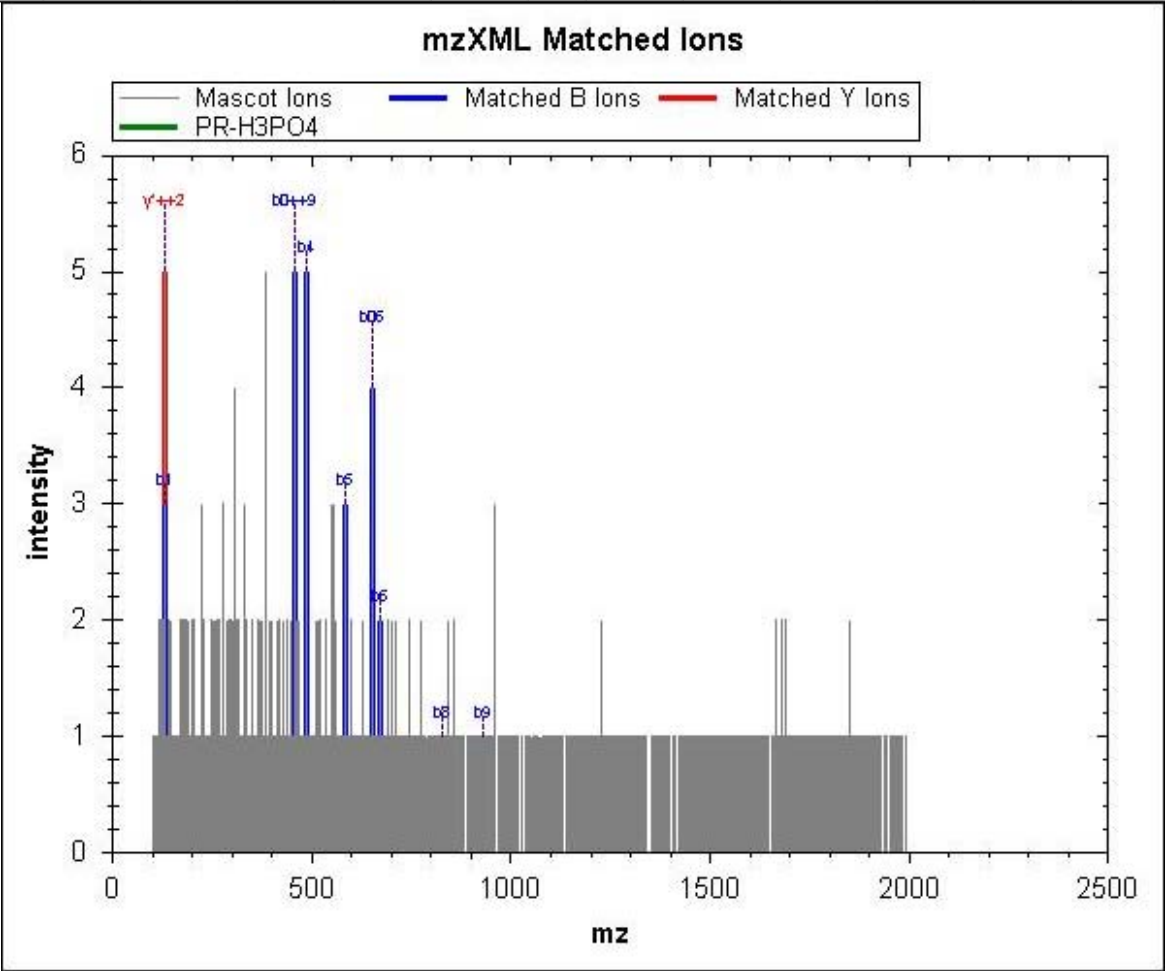

Protein index=1227, ACC No: IPI00023161

Peptide index=833 MS/MS spectrum

Sequence: SLYSDHELRL, m/z: 560.2756, charge: + 2, Modification: , Mod Position:

Score: 44.56, Raw data: WET\_B5\_090616\_02.mzxml, MS/MS Elution time: 26.25417, Scan number: 1305, Mass delta: 0.0121, Rank: 1

| No | b      | b++    | b0     | b0++   | Seq | y       | y++    | y*      | y*++   | y0     | y0++   | RevNo |
|----|--------|--------|--------|--------|-----|---------|--------|---------|--------|--------|--------|-------|
| 1  | 88.04  | 44.52  | 70.03  | 35.52  | S   |         |        |         |        |        |        | 9     |
| 2  | 201.12 | 101.07 | 183.11 | 92.06  | L   | 1032.51 | 516.76 | 1015.48 | 508.25 | 1014.5 | 507.75 | 8     |
| 3  | 364.19 | 182.6  | 346.18 | 173.59 | Y   | 919.43  | 460.22 | 902.4   | 451.7  | 901.42 | 451.21 | 7     |

|   |        |        |        |        |   |        |        |        |        |        |        |   |
|---|--------|--------|--------|--------|---|--------|--------|--------|--------|--------|--------|---|
| 4 | 451.22 | 226.11 | 433.21 | 217.11 | S | 756.36 | 378.69 | 739.34 | 370.17 | 738.35 | 369.68 | 6 |
| 5 | 566.25 | 283.63 | 548.24 | 274.62 | D | 669.33 | 335.17 | 652.3  | 326.66 | 651.32 | 326.16 | 5 |
| 6 | 703.3  | 352.16 | 685.29 | 343.15 | H | 554.3  | 277.66 | 537.28 | 269.14 | 536.29 | 268.65 | 4 |
| 7 | 832.35 | 416.68 | 814.34 | 407.67 | E | 417.25 | 209.13 | 400.22 | 200.61 | 399.24 | 200.12 | 3 |
| 8 | 945.43 | 473.22 | 927.42 | 464.21 | L | 288.2  | 144.61 | 271.18 | 136.09 |        |        | 2 |
| 9 |        |        |        |        | R | 175.12 | 88.06  | 158.09 | 79.55  |        |        | 1 |

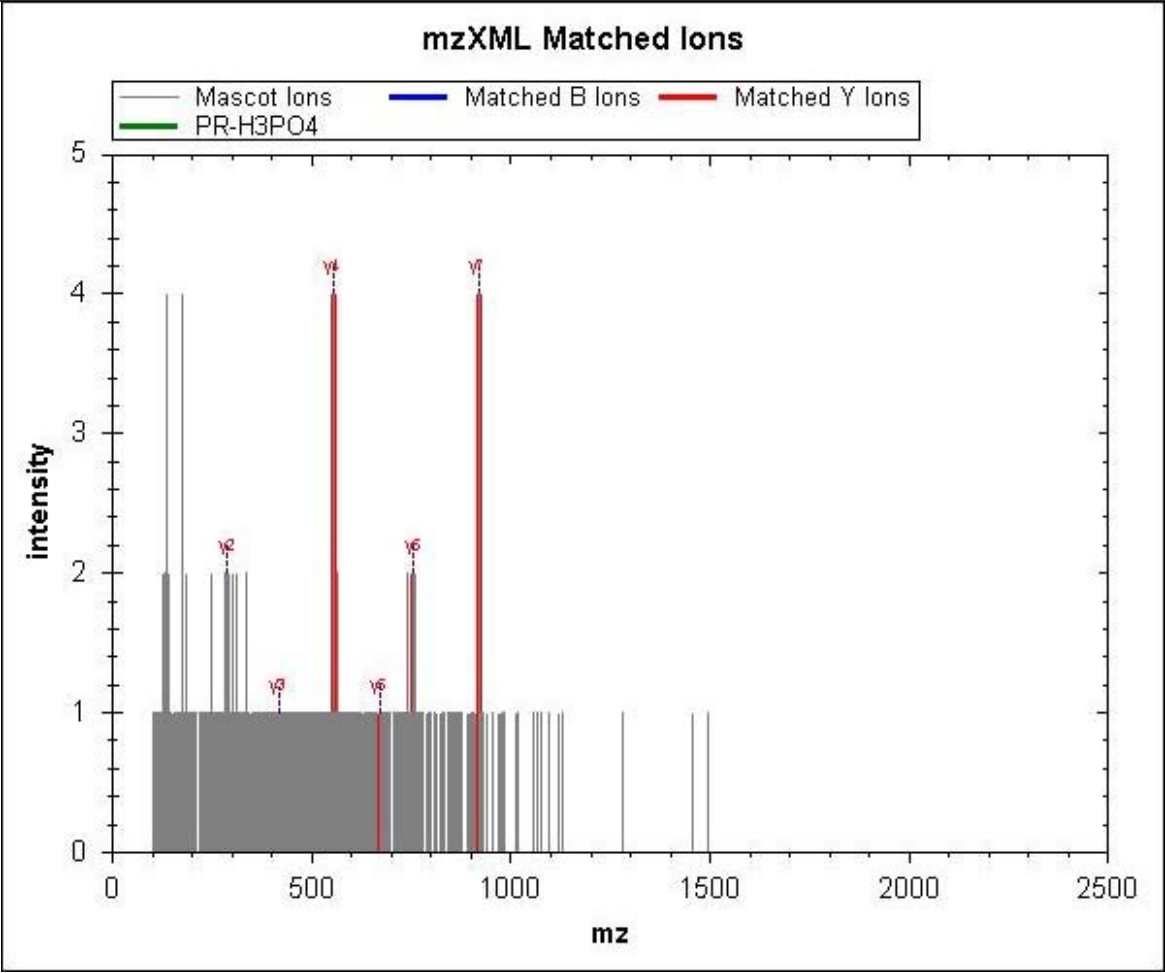

Protein index=1228, ACC No:IP100060107

Peptide index=1259 MS/MS spectrum

Sequence: KPVLPKNKPLILANR, m/z:426.0223, charge:+ 4, Modification: , Mod Position:

Score: 48.5, Raw data:WET\_B5\_090616\_03.mzxml, MS/MS Elution time: 31.49583, Scan number:1606, Mass delta:-0.0248, Rank:1

| No | b      | b++    | b*     | b*++   | Seq | y       | y++    | y*      | y*++   | RevNo |
|----|--------|--------|--------|--------|-----|---------|--------|---------|--------|-------|
| 1  | 129.1  | 65.05  | 112.08 | 56.54  | K   |         |        |         |        | 15    |
| 2  | 226.15 | 113.58 | 209.13 | 105.07 | P   | 1572.99 | 787    | 1555.97 | 778.49 | 14    |
| 3  | 325.22 | 163.12 | 308.2  | 154.6  | V   | 1475.94 | 738.47 | 1458.92 | 729.96 | 13    |
| 4  | 438.31 | 219.66 | 421.28 | 211.14 | L   | 1376.87 | 688.94 | 1359.85 | 680.43 | 12    |
| 5  | 566.4  | 283.7  | 549.38 | 275.19 | K   | 1263.79 | 632.4  | 1246.76 | 623.89 | 11    |
| 6  | 663.46 | 332.23 | 646.43 | 323.72 | P   | 1135.69 | 568.35 | 1118.67 | 559.84 | 10    |

|    |         |        |         |        |   |         |        |         |        |   |
|----|---------|--------|---------|--------|---|---------|--------|---------|--------|---|
| 7  | 777.5   | 389.25 | 760.47  | 380.74 | N | 1038.64 | 519.82 | 1021.62 | 511.31 | 9 |
| 8  | 905.59  | 453.3  | 888.57  | 444.79 | K | 924.6   | 462.8  | 907.57  | 454.29 | 8 |
| 9  | 1002.65 | 501.83 | 985.62  | 493.31 | P | 796.5   | 398.76 | 779.48  | 390.24 | 7 |
| 10 | 1115.73 | 558.37 | 1098.7  | 549.86 | L | 699.45  | 350.23 | 682.42  | 341.72 | 6 |
| 11 | 1228.81 | 614.91 | 1211.79 | 606.4  | I | 586.37  | 293.69 | 569.34  | 285.17 | 5 |
| 12 | 1341.9  | 671.45 | 1324.87 | 662.94 | L | 473.28  | 237.15 | 456.26  | 228.63 | 4 |
| 13 | 1412.94 | 706.97 | 1395.91 | 698.46 | A | 360.2   | 180.6  | 343.17  | 172.09 | 3 |
| 14 | 1526.98 | 763.99 | 1509.95 | 755.48 | N | 289.16  | 145.08 | 272.14  | 136.57 | 2 |
| 15 |         |        |         |        | R | 175.12  | 88.06  | 158.09  | 79.55  | 1 |

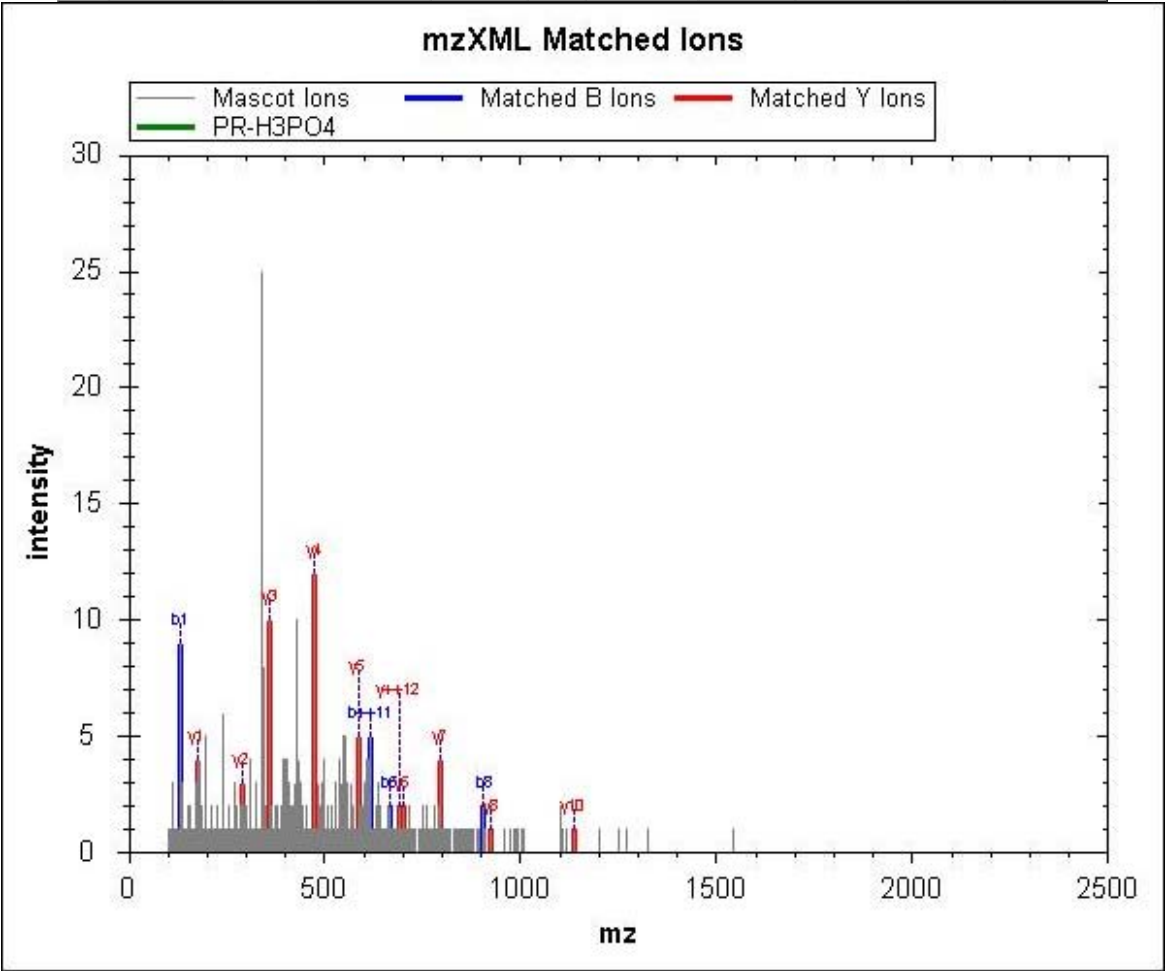

|    |         |         |         |         |         |         |   |         |        |         |        |         |        |    |
|----|---------|---------|---------|---------|---------|---------|---|---------|--------|---------|--------|---------|--------|----|
| 4  | 463.22  | 232.11  |         |         | 445.21  | 223.11  | V | 1960.02 | 980.51 | 1942.99 | 972    | 1942.01 | 971.51 | 17 |
| 5  | 562.29  | 281.65  |         |         | 544.28  | 272.64  | V | 1860.95 | 930.98 | 1843.92 | 922.46 | 1842.94 | 921.97 | 16 |
| 6  | 659.34  | 330.17  |         |         | 641.33  | 321.17  | P | 1761.88 | 881.44 | 1744.85 | 872.93 | 1743.87 | 872.44 | 15 |
| 7  | 774.37  | 387.69  |         |         | 756.36  | 378.68  | D | 1664.83 | 832.92 | 1647.8  | 824.4  | 1646.82 | 823.91 | 14 |
| 8  | 887.45  | 444.23  |         |         | 869.44  | 435.22  | L | 1549.8  | 775.4  | 1532.77 | 766.89 | 1531.79 | 766.4  | 13 |
| 9  | 1016.49 | 508.75  |         |         | 998.48  | 499.75  | E | 1436.72 | 718.86 | 1419.69 | 710.35 | 1418.71 | 709.86 | 12 |
| 10 | 1129.58 | 565.29  |         |         | 1111.57 | 556.29  | L | 1307.67 | 654.34 | 1290.65 | 645.83 | 1289.66 | 645.34 | 11 |
| 11 | 1226.63 | 613.82  |         |         | 1208.62 | 604.81  | P | 1194.59 | 597.8  | 1177.56 | 589.29 | 1176.58 | 588.79 | 10 |
| 12 | 1313.66 | 657.33  |         |         | 1295.65 | 648.33  | S | 1097.54 | 549.27 | 1080.51 | 540.76 | 1079.53 | 540.27 | 9  |
| 13 | 1499.74 | 750.37  |         |         | 1481.73 | 741.37  | W | 1010.51 | 505.76 | 993.48  | 497.24 | 992.49  | 496.75 | 8  |
| 14 | 1612.83 | 806.92  |         |         | 1594.82 | 797.91  | L | 824.43  | 412.72 | 807.4   | 404.2  | 806.42  | 403.71 | 7  |
| 15 | 1713.87 | 857.44  |         |         | 1695.86 | 848.44  | T | 711.34  | 356.17 | 694.32  | 347.66 | 693.33  | 347.17 | 6  |
| 16 | 1814.92 | 907.96  |         |         | 1796.91 | 898.96  | T | 610.29  | 305.65 | 593.27  | 297.14 | 592.28  | 296.65 | 5  |
| 17 | 1871.94 | 936.48  |         |         | 1853.93 | 927.47  | G | 509.25  | 255.13 | 492.22  | 246.61 |         |        | 4  |
| 18 | 1985.99 | 993.5   | 1968.96 | 984.98  | 1967.98 | 984.49  | N | 452.23  | 226.62 | 435.2   | 218.1  |         |        | 3  |
| 19 | 2149.05 | 1075.03 | 2132.02 | 1066.51 | 2131.04 | 1066.02 | Y | 338.18  | 169.59 | 321.16  | 161.08 |         |        | 2  |
| 20 |         |         |         |         |         |         | R | 175.12  | 88.06  | 158.09  | 79.55  |         |        | 1  |

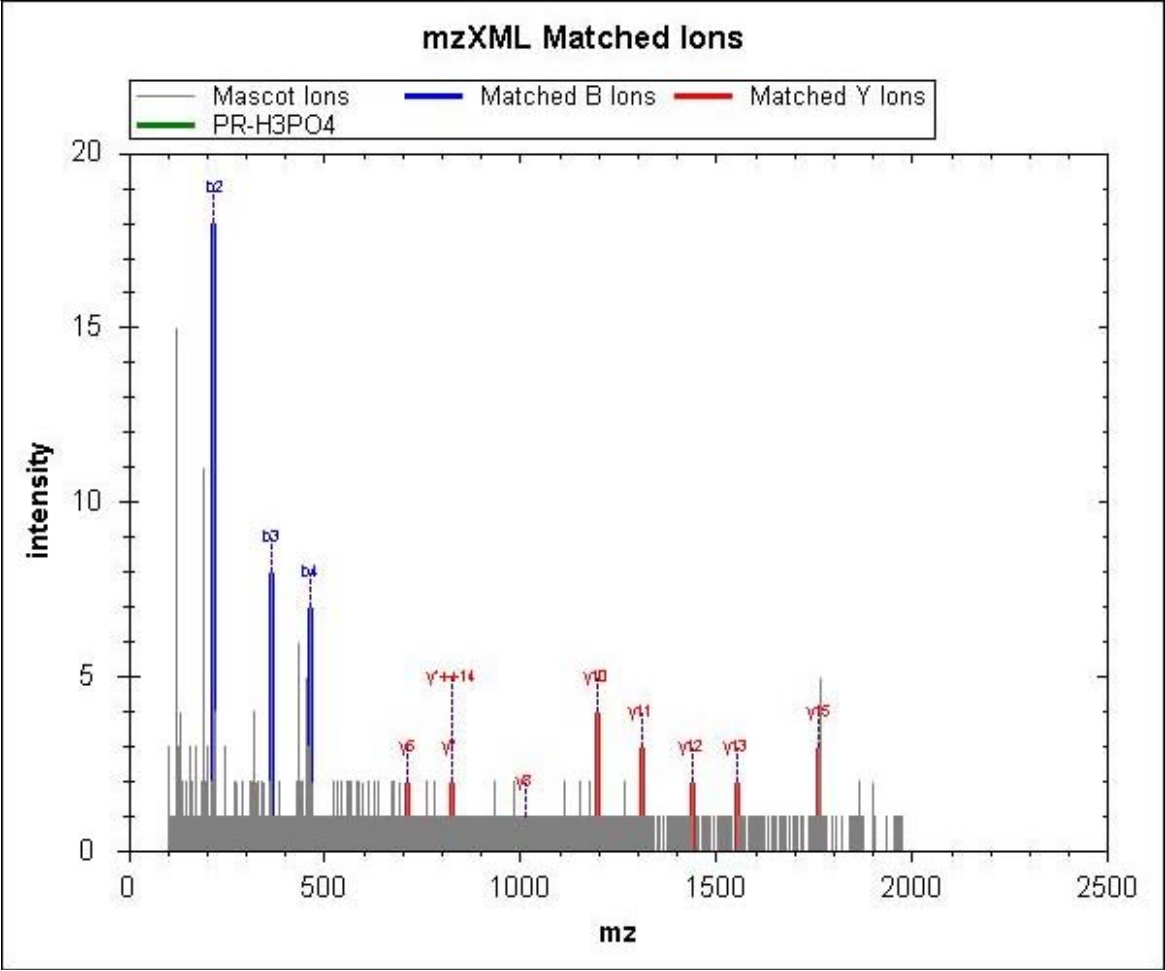

Protein index=1230, ACC No:IPI00001546

Peptide index=3364 MS/MS spectrum

Sequence: FIDTTLAITSR, m/z:619.3434, charge:+ 2, Modification: , Mod Position:

Score: 72.21, Raw data:WET\_A5\_090615\_02.mzxml, MS/MS Elution time: 51.772, Scan number:2788, Mass delta:0.0008, Rank:1

| No | b       | b++    | b0      | b0++   | Seq | y       | y++    | y*      | y*++   | y0     | y0++   | RevNo |
|----|---------|--------|---------|--------|-----|---------|--------|---------|--------|--------|--------|-------|
| 1  | 148.08  | 74.54  |         |        | F   |         |        |         |        |        |        | 11    |
| 2  | 261.16  | 131.08 |         |        | I   | 1090.61 | 545.81 | 1073.58 | 537.3  | 1072.6 | 536.8  | 10    |
| 3  | 376.19  | 188.6  | 358.18  | 179.59 | D   | 977.53  | 489.27 | 960.5   | 480.75 | 959.52 | 480.26 | 9     |
| 4  | 477.23  | 239.12 | 459.22  | 230.12 | T   | 862.5   | 431.75 | 845.47  | 423.24 | 844.49 | 422.75 | 8     |
| 5  | 578.28  | 289.64 | 560.27  | 280.64 | T   | 761.45  | 381.23 | 744.42  | 372.72 | 743.44 | 372.22 | 7     |
| 6  | 691.37  | 346.19 | 673.36  | 337.18 | L   | 660.4   | 330.71 | 643.38  | 322.19 | 642.39 | 321.7  | 6     |
| 7  | 762.4   | 381.71 | 744.39  | 372.7  | A   | 547.32  | 274.16 | 530.29  | 265.65 | 529.31 | 265.16 | 5     |
| 8  | 875.49  | 438.25 | 857.48  | 429.24 | I   | 476.28  | 238.65 | 459.26  | 230.13 | 458.27 | 229.64 | 4     |
| 9  | 976.53  | 488.77 | 958.52  | 479.77 | T   | 363.2   | 182.1  | 346.17  | 173.59 | 345.19 | 173.1  | 3     |
| 10 | 1063.57 | 532.29 | 1045.56 | 523.28 | S   | 262.15  | 131.58 | 245.12  | 123.07 | 244.14 | 122.57 | 2     |
| 11 |         |        |         |        | R   | 175.12  | 88.06  | 158.09  | 79.55  |        |        | 1     |

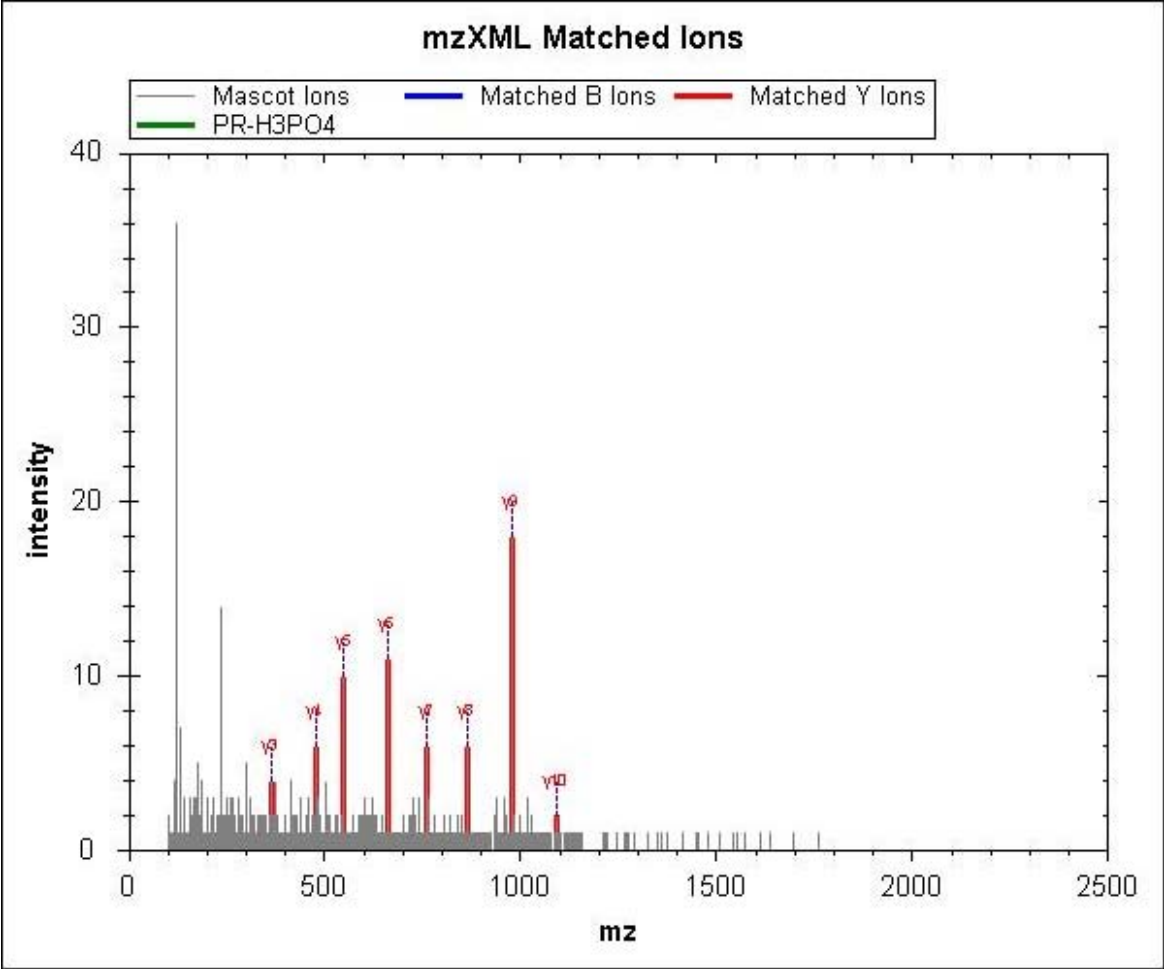

Protein index=1231, ACC No:IP100293476

Peptide index=4416 MS/MS spectrum

Sequence: NYLEGIYNVPVAAVR, m/z:839.4452, charge:+ 2, Modification: , Mod Position:

Score: 37.11, Raw data:WET\_A5\_090615\_02.mzxml, MS/MS Elution time: 62.01767, Scan number:3388, Mass delta:-0.0127, Rank:1

| No | b       | b++    | b*      | b*++   | b0      | b0++   | Seq | y       | y++    | y*      | y*++   | y0      | y0++   | RevNo |
|----|---------|--------|---------|--------|---------|--------|-----|---------|--------|---------|--------|---------|--------|-------|
| 1  | 115.05  | 58.03  | 98.02   | 49.52  |         |        | N   |         |        |         |        |         |        | 15    |
| 2  | 278.11  | 139.56 | 261.09  | 131.05 |         |        | Y   | 1563.85 | 782.43 | 1546.83 | 773.92 | 1545.84 | 773.42 | 14    |
| 3  | 391.2   | 196.1  | 374.17  | 187.59 |         |        | L   | 1400.79 | 700.9  | 1383.76 | 692.39 | 1382.78 | 691.89 | 13    |
| 4  | 520.24  | 260.62 | 503.21  | 252.11 | 502.23  | 251.62 | E   | 1287.71 | 644.36 | 1270.68 | 635.84 | 1269.69 | 635.35 | 12    |
| 5  | 577.26  | 289.13 | 560.24  | 280.62 | 559.25  | 280.13 | G   | 1158.66 | 579.84 | 1141.64 | 571.32 |         |        | 11    |
| 6  | 690.35  | 345.68 | 673.32  | 337.16 | 672.34  | 336.67 | I   | 1101.64 | 551.32 | 1084.61 | 542.81 |         |        | 10    |
| 7  | 853.41  | 427.21 | 836.38  | 418.69 | 835.4   | 418.2  | Y   | 988.56  | 494.78 | 971.53  | 486.27 |         |        | 9     |
| 8  | 967.45  | 484.23 | 950.43  | 475.72 | 949.44  | 475.22 | N   | 825.49  | 413.25 | 808.47  | 404.74 |         |        | 8     |
| 9  | 1066.52 | 533.76 | 1049.49 | 525.25 | 1048.51 | 524.76 | V   | 711.45  | 356.23 | 694.42  | 347.72 |         |        | 7     |
| 10 | 1163.57 | 582.29 | 1146.55 | 573.78 | 1145.56 | 573.28 | P   | 612.38  | 306.7  | 595.36  | 298.18 |         |        | 6     |
| 11 | 1262.64 | 631.82 | 1245.61 | 623.31 | 1244.63 | 622.82 | V   | 515.33  | 258.17 | 498.3   | 249.66 |         |        | 5     |
| 12 | 1333.68 | 667.34 | 1316.65 | 658.83 | 1315.67 | 658.34 | A   | 416.26  | 208.63 | 399.24  | 200.12 |         |        | 4     |
| 13 | 1404.72 | 702.86 | 1387.69 | 694.35 | 1386.71 | 693.86 | A   | 345.22  | 173.12 | 328.2   | 164.6  |         |        | 3     |
| 14 | 1503.78 | 752.4  | 1486.76 | 743.88 | 1485.77 | 743.39 | V   | 274.19  | 137.6  | 257.16  | 129.08 |         |        | 2     |
| 15 |         |        |         |        |         |        | R   | 175.12  | 88.06  | 158.09  | 79.55  |         |        | 1     |

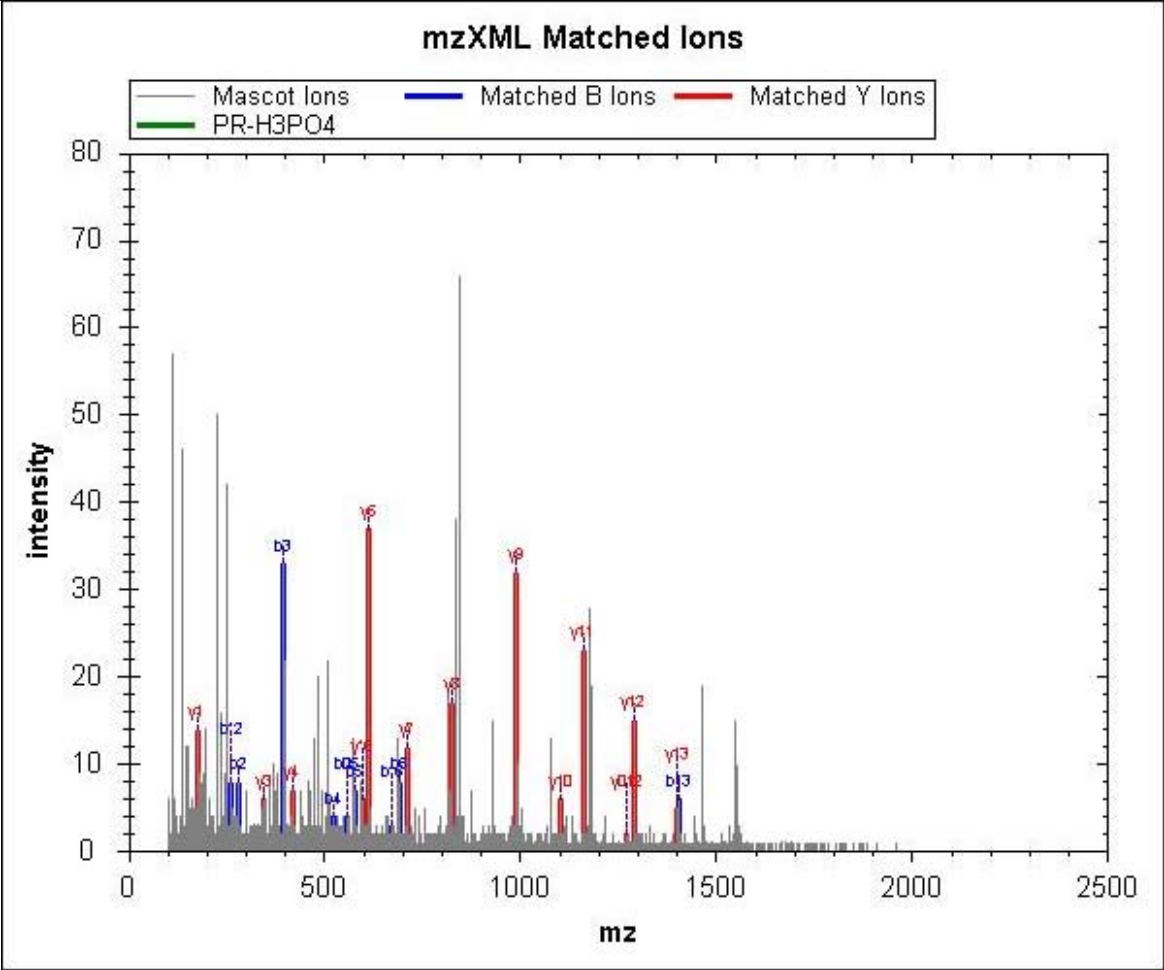

Peptide index=605 MS/MS spectrum

Sequence: LSVNSHFMK, m/z:539.7676, charge:+ 2, Modification: Oxidation (M), Mod Position: 0.000000010.0

Score: 43.54, Raw data:WET\_A5\_090615\_02.mzxml, MS/MS Elution time: 21.1465, Scan number:990, Mass delta:-0.0071, Rank:1

| No | b      | b++    | b*     | b*++   | b0     | b0++   | Seq | y      | y++    | y*     | y*++   | y0     | y0++   | RevNo |
|----|--------|--------|--------|--------|--------|--------|-----|--------|--------|--------|--------|--------|--------|-------|
| 1  | 114.09 | 57.55  |        |        |        |        | L   |        |        |        |        |        |        | 9     |
| 2  | 201.12 | 101.07 |        |        | 183.11 | 92.06  | S   | 901.45 | 451.23 | 884.43 | 442.72 | 883.44 | 442.22 | 8     |
| 3  | 300.19 | 150.6  |        |        | 282.18 | 141.59 | V   | 814.42 | 407.71 | 797.39 | 399.2  | 796.41 | 398.71 | 7     |
| 4  | 414.23 | 207.62 | 397.21 | 199.11 | 396.22 | 198.62 | N   | 715.35 | 358.18 | 698.33 | 349.67 | 697.34 | 349.17 | 6     |
| 5  | 501.27 | 251.14 | 484.24 | 242.62 | 483.26 | 242.13 | S   | 601.31 | 301.16 | 584.28 | 292.64 | 583.3  | 292.15 | 5     |
| 6  | 638.33 | 319.67 | 621.3  | 311.15 | 620.32 | 310.66 | H   | 514.28 | 257.64 | 497.25 | 249.13 |        |        | 4     |
| 7  | 785.39 | 393.2  | 768.37 | 384.69 | 767.38 | 384.2  | F   | 377.22 | 189.11 | 360.19 | 180.6  |        |        | 3     |
| 8  | 868.43 | 434.72 | 851.4  | 426.21 | 850.42 | 425.71 | M   | 230.15 | 115.58 | 213.12 | 107.07 |        |        | 2     |
| 9  |        |        |        |        |        |        | K   | 147.11 | 74.06  | 130.09 | 65.55  |        |        | 1     |

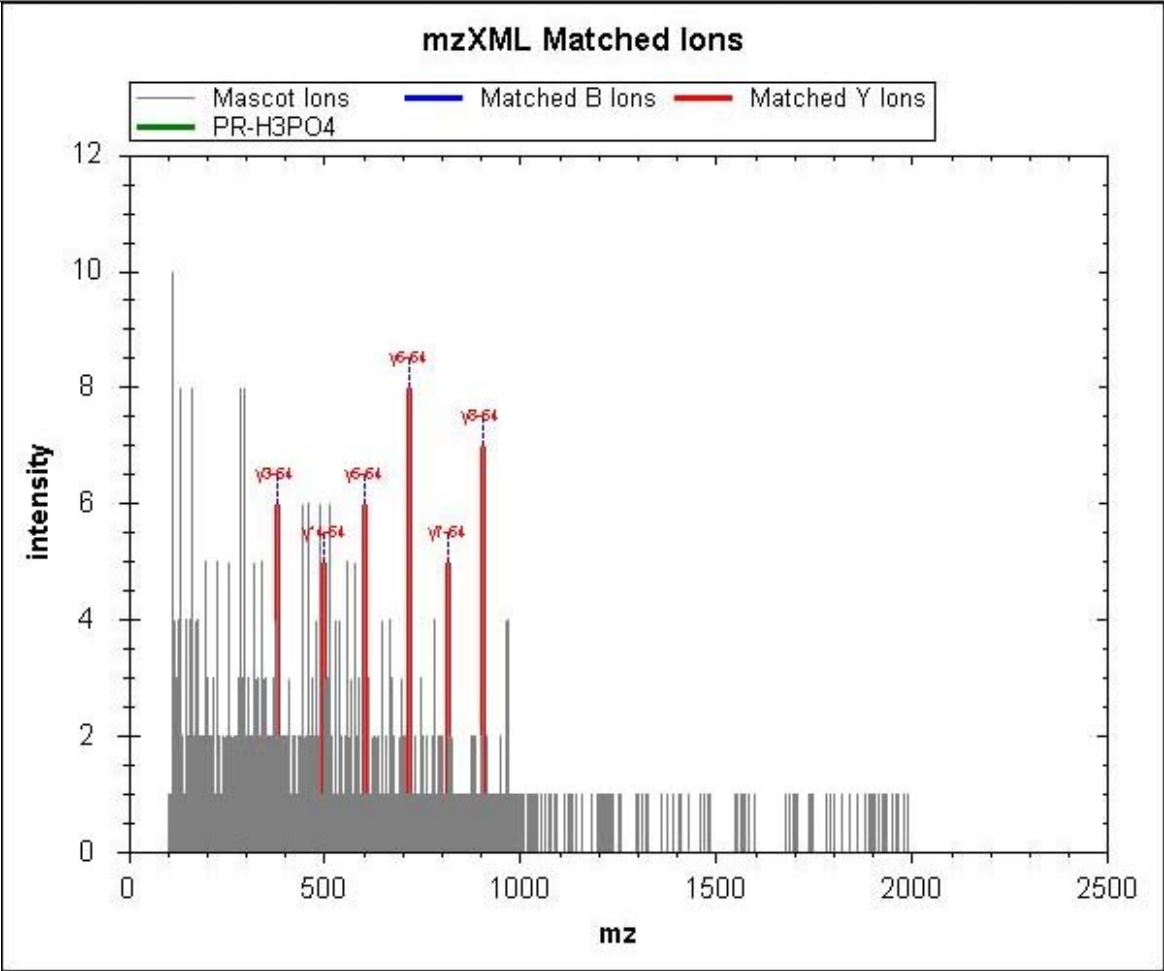

Protein index=1235, ACC No: IPI00003990

Peptide index=6740 MS/MS spectrum

Sequence: VSLLGWSDGGITALIAAAK, m/z:922.0269, charge:+ 2, Modification: , Mod Position:

Score: 69.1, Raw data:WET\_B5\_090616\_02.mzxml, MS/MS Elution time: 95.27734, Scan number:5347, Mass delta:-0.0048, Rank:1

| No | b       | b++    | b0      | b0++   | Seq | y       | y++    | y*      | y*++   | y0      | y0++   | RevNo |
|----|---------|--------|---------|--------|-----|---------|--------|---------|--------|---------|--------|-------|
| 1  | 100.08  | 50.54  |         |        | V   |         |        |         |        |         |        | 19    |
| 2  | 187.11  | 94.06  | 169.1   | 85.05  | S   | 1743.96 | 872.49 | 1726.94 | 863.97 | 1725.95 | 863.48 | 18    |
| 3  | 300.19  | 150.6  | 282.18  | 141.59 | L   | 1656.93 | 828.97 | 1639.91 | 820.46 | 1638.92 | 819.96 | 17    |
| 4  | 413.28  | 207.14 | 395.27  | 198.14 | L   | 1543.85 | 772.43 | 1526.82 | 763.91 | 1525.84 | 763.42 | 16    |
| 5  | 470.3   | 235.65 | 452.29  | 226.65 | G   | 1430.76 | 715.89 | 1413.74 | 707.37 | 1412.75 | 706.88 | 15    |
| 6  | 656.38  | 328.69 | 638.37  | 319.69 | W   | 1373.74 | 687.37 | 1356.72 | 678.86 | 1355.73 | 678.37 | 14    |
| 7  | 743.41  | 372.21 | 725.4   | 363.2  | S   | 1187.66 | 594.34 | 1170.64 | 585.82 | 1169.65 | 585.33 | 13    |
| 8  | 858.44  | 429.72 | 840.42  | 420.72 | D   | 1100.63 | 550.82 | 1083.6  | 542.31 | 1082.62 | 541.81 | 12    |
| 9  | 915.46  | 458.23 | 897.45  | 449.23 | G   | 985.6   | 493.31 | 968.58  | 484.79 | 967.59  | 484.3  | 11    |
| 10 | 972.48  | 486.74 | 954.47  | 477.74 | G   | 928.58  | 464.79 | 911.56  | 456.28 | 910.57  | 455.79 | 10    |
| 11 | 1085.56 | 543.28 | 1067.55 | 534.28 | I   | 871.56  | 436.28 | 854.53  | 427.77 | 853.55  | 427.28 | 9     |
| 12 | 1186.61 | 593.81 | 1168.6  | 584.8  | T   | 758.48  | 379.74 | 741.45  | 371.23 | 740.47  | 370.74 | 8     |
| 13 | 1257.65 | 629.33 | 1239.64 | 620.32 | A   | 657.43  | 329.22 | 640.4   | 320.71 |         |        | 7     |
| 14 | 1370.73 | 685.87 | 1352.72 | 676.86 | L   | 586.39  | 293.7  | 569.37  | 285.19 |         |        | 6     |
| 15 | 1483.82 | 742.41 | 1465.81 | 733.41 | I   | 473.31  | 237.16 | 456.28  | 228.64 |         |        | 5     |
| 16 | 1554.85 | 777.93 | 1536.84 | 768.92 | A   | 360.22  | 180.62 | 343.2   | 172.1  |         |        | 4     |
| 17 | 1625.89 | 813.45 | 1607.88 | 804.44 | A   | 289.19  | 145.1  | 272.16  | 136.58 |         |        | 3     |
| 18 | 1696.93 | 848.97 | 1678.92 | 839.96 | A   | 218.15  | 109.58 | 201.12  | 101.07 |         |        | 2     |
| 19 |         |        |         |        | K   | 147.11  | 74.06  | 130.09  | 65.55  |         |        | 1     |

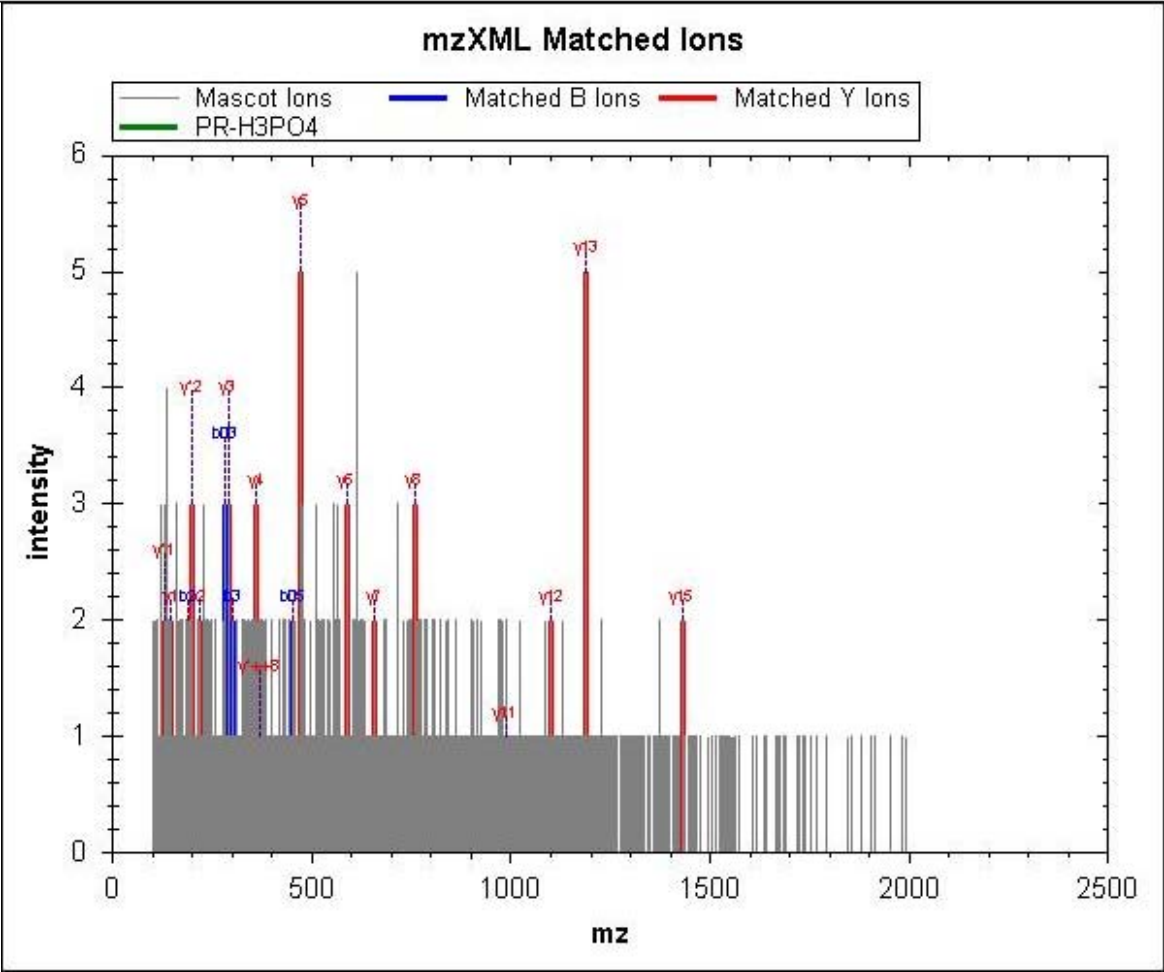

Protein index=1237, ACC No: IPI00032957

Peptide index=2670 MS/MS spectrum

Sequence: KDHPFGFVAVPTK, m/z:481.5935, charge:+ 3, Modification: , Mod Position:

Score: 50.08, Raw data:WET\_B5\_090616\_02.mzxml, MS/MS Elution time: 46.41784, Scan number:2486, Mass delta:-0.0062, Rank:1

| No | b       | b++    | b*      | b*++   | b0      | b0++   | Seq | y       | y++    | y*      | y*++   | y0      | y0++   | RevNo |
|----|---------|--------|---------|--------|---------|--------|-----|---------|--------|---------|--------|---------|--------|-------|
| 1  | 129.1   | 65.05  | 112.08  | 56.54  |         |        | K   |         |        |         |        |         |        | 13    |
| 2  | 244.13  | 122.57 | 227.1   | 114.05 | 226.12  | 113.56 | D   | 1314.68 | 657.85 | 1297.66 | 649.33 | 1296.67 | 648.84 | 12    |
| 3  | 381.19  | 191.1  | 364.16  | 182.58 | 363.18  | 182.09 | H   | 1199.66 | 600.33 | 1182.63 | 591.82 | 1181.65 | 591.33 | 11    |
| 4  | 478.24  | 239.62 | 461.21  | 231.11 | 460.23  | 230.62 | P   | 1062.6  | 531.8  | 1045.57 | 523.29 | 1044.59 | 522.8  | 10    |
| 5  | 625.31  | 313.16 | 608.28  | 304.64 | 607.3   | 304.15 | F   | 965.55  | 483.28 | 948.52  | 474.76 | 947.53  | 474.27 | 9     |
| 6  | 682.33  | 341.67 | 665.3   | 333.16 | 664.32  | 332.66 | G   | 818.48  | 409.74 | 801.45  | 401.23 | 800.47  | 400.74 | 8     |
| 7  | 829.4   | 415.2  | 812.37  | 406.69 | 811.39  | 406.2  | F   | 761.46  | 381.23 | 744.43  | 372.72 | 743.45  | 372.23 | 7     |
| 8  | 928.47  | 464.74 | 911.44  | 456.22 | 910.46  | 455.73 | V   | 614.39  | 307.7  | 597.36  | 299.18 | 596.38  | 298.69 | 6     |
| 9  | 999.5   | 500.26 | 982.48  | 491.74 | 981.49  | 491.25 | A   | 515.32  | 258.16 | 498.29  | 249.65 | 497.31  | 249.16 | 5     |
| 10 | 1098.57 | 549.79 | 1081.55 | 541.28 | 1080.56 | 540.78 | V   | 444.28  | 222.64 | 427.26  | 214.13 | 426.27  | 213.64 | 4     |
| 11 | 1195.63 | 598.32 | 1178.6  | 589.8  | 1177.62 | 589.31 | P   | 345.21  | 173.11 | 328.19  | 164.6  | 327.2   | 164.1  | 3     |
| 12 | 1296.67 | 648.84 | 1279.65 | 640.33 | 1278.66 | 639.84 | T   | 248.16  | 124.58 | 231.13  | 116.07 | 230.15  | 115.58 | 2     |

|    |  |  |  |  |   |        |       |        |       |  |  |   |
|----|--|--|--|--|---|--------|-------|--------|-------|--|--|---|
| 13 |  |  |  |  | K | 147.11 | 74.06 | 130.09 | 65.55 |  |  | 1 |
|----|--|--|--|--|---|--------|-------|--------|-------|--|--|---|

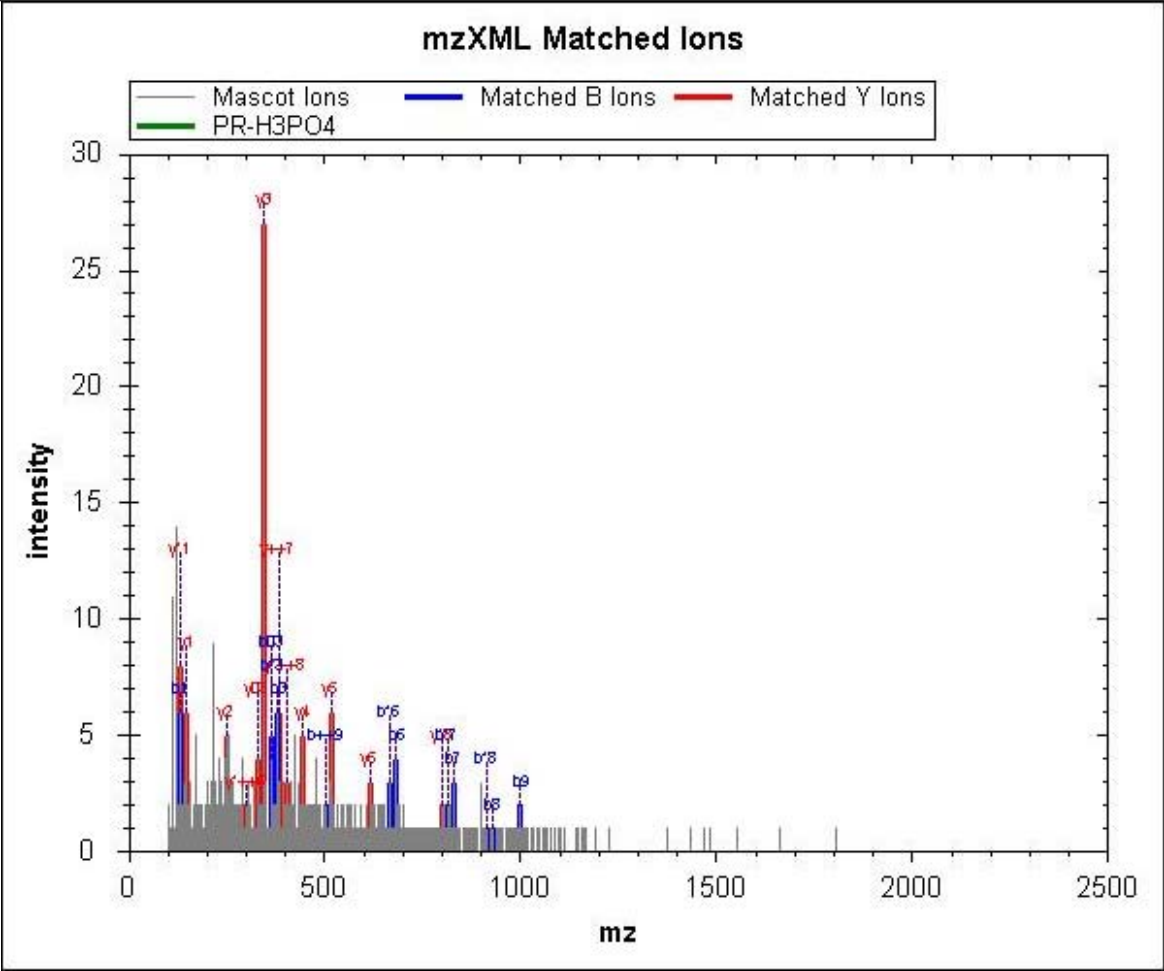

Protein index=1238, ACC No:IP100747989

Peptide index=6113 MS/MS spectrum

Sequence: GIMNSFVNDIFER, m/z:771.3854, charge:+ 2, Modification: , Mod Position:

Score: 51.15, Raw data:WET\_B5\_090616\_01.mzxml, MS/MS Elution time: 82.78284, Scan number:4581, Mass delta:0.019, Rank:1

| No | b       | b++    | b*      | b*++   | b0      | b0++   | Seq | y       | y++    | y*      | y*++   | y0      | y0++   | RevNo |
|----|---------|--------|---------|--------|---------|--------|-----|---------|--------|---------|--------|---------|--------|-------|
| 1  | 58.03   | 29.52  |         |        |         |        | G   |         |        |         |        |         |        | 13    |
| 2  | 171.11  | 86.06  |         |        |         |        | I   | 1484.72 | 742.86 | 1467.69 | 734.35 | 1466.71 | 733.86 | 12    |
| 3  | 302.15  | 151.58 |         |        |         |        | M   | 1371.64 | 686.32 | 1354.61 | 677.81 | 1353.63 | 677.32 | 11    |
| 4  | 416.2   | 208.6  | 399.17  | 200.09 |         |        | N   | 1240.6  | 620.8  | 1223.57 | 612.29 | 1222.58 | 611.8  | 10    |
| 5  | 503.23  | 252.12 | 486.2   | 243.6  | 485.22  | 243.11 | S   | 1126.55 | 563.78 | 1109.53 | 555.27 | 1108.54 | 554.77 | 9     |
| 6  | 650.3   | 325.65 | 633.27  | 317.14 | 632.29  | 316.65 | F   | 1039.52 | 520.26 | 1022.49 | 511.75 | 1021.51 | 511.26 | 8     |
| 7  | 749.37  | 375.19 | 732.34  | 366.67 | 731.35  | 366.18 | V   | 892.45  | 446.73 | 875.43  | 438.22 | 874.44  | 437.72 | 7     |
| 8  | 863.41  | 432.21 | 846.38  | 423.69 | 845.4   | 423.2  | N   | 793.38  | 397.2  | 776.36  | 388.68 | 775.37  | 388.19 | 6     |
| 9  | 978.43  | 489.72 | 961.41  | 481.21 | 960.42  | 480.72 | D   | 679.34  | 340.17 | 662.31  | 331.66 | 661.33  | 331.17 | 5     |
| 10 | 1091.52 | 546.26 | 1074.49 | 537.75 | 1073.51 | 537.26 | I   | 564.31  | 282.66 | 547.29  | 274.15 | 546.3   | 273.66 | 4     |
| 11 | 1238.59 | 619.8  | 1221.56 | 611.28 | 1220.58 | 610.79 | F   | 451.23  | 226.12 | 434.2   | 217.61 | 433.22  | 217.11 | 3     |

|    |         |        |        |        |         |        |   |        |        |        |        |        |        |   |
|----|---------|--------|--------|--------|---------|--------|---|--------|--------|--------|--------|--------|--------|---|
| 12 | 1367.63 | 684.32 | 1350.6 | 675.81 | 1349.62 | 675.31 | E | 304.16 | 152.58 | 287.13 | 144.07 | 286.15 | 143.58 | 2 |
| 13 |         |        |        |        |         |        | R | 175.12 | 88.06  | 158.09 | 79.55  |        |        | 1 |

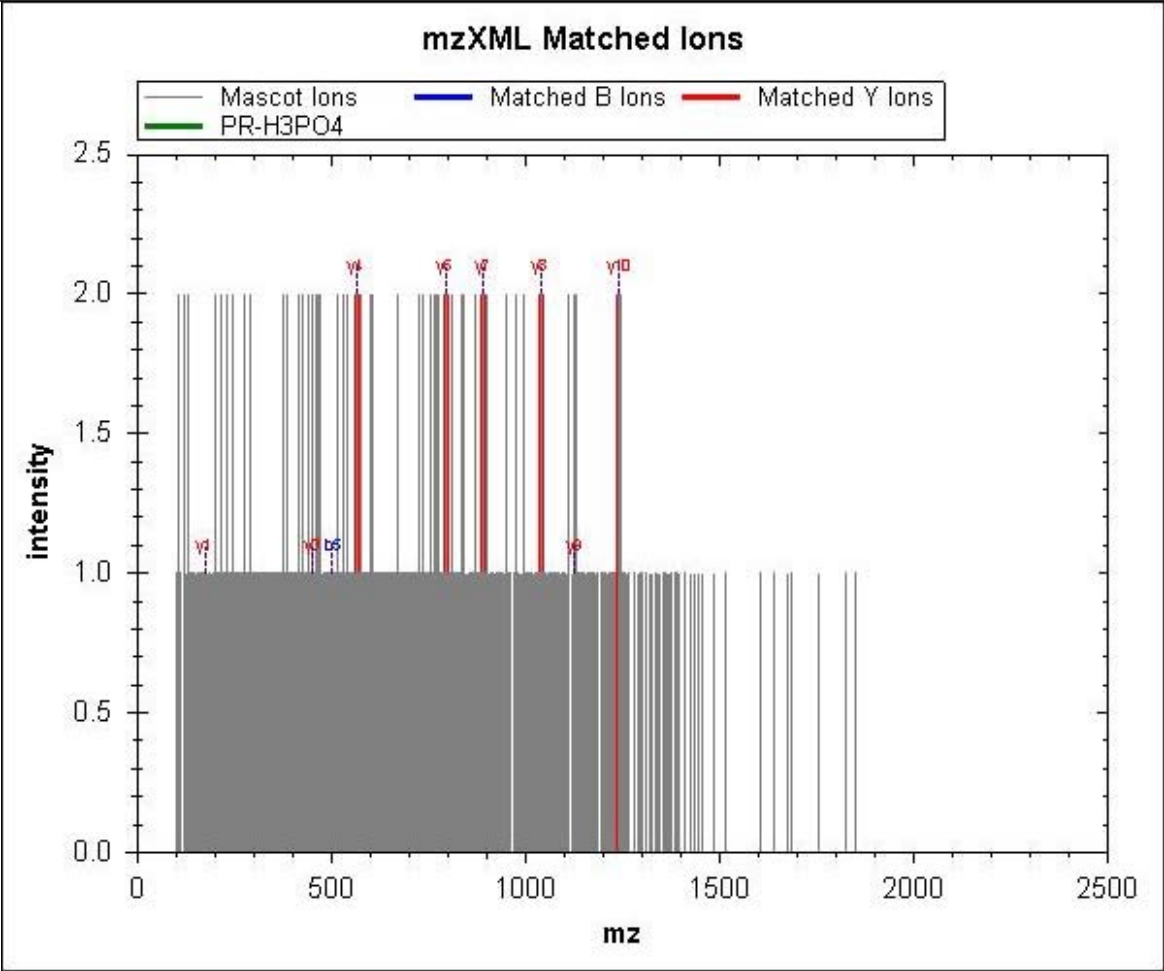

Protein index=1239, ACC No:IPI00829834

Peptide index=3854 MS/MS spectrum

Sequence: EIVMTQSPPTLSLSPGER, m/z:971.505, charge:+ 2, Modification: , Mod Position:

Score: 37.29, Raw data:WET\_B1\_090616\_02.mzxml, MS/MS Elution time: 56.91583, Scan number:3092, Mass delta:0.0011, Rank:1

| No | b       | b++    | b*      | b*++   | b0      | b0++   | Seq | y       | y++    | y*      | y*++   | y0      | y0++   | RevNo |
|----|---------|--------|---------|--------|---------|--------|-----|---------|--------|---------|--------|---------|--------|-------|
| 1  | 130.05  | 65.53  |         |        | 112.04  | 56.52  | E   |         |        |         |        |         |        | 18    |
| 2  | 243.13  | 122.07 |         |        | 225.12  | 113.07 | I   | 1812.95 | 906.98 | 1795.93 | 898.47 | 1794.94 | 897.97 | 17    |
| 3  | 342.2   | 171.6  |         |        | 324.19  | 162.6  | V   | 1699.87 | 850.44 | 1682.84 | 841.92 | 1681.86 | 841.43 | 16    |
| 4  | 473.24  | 237.13 |         |        | 455.23  | 228.12 | M   | 1600.8  | 800.9  | 1583.77 | 792.39 | 1582.79 | 791.9  | 15    |
| 5  | 574.29  | 287.65 |         |        | 556.28  | 278.64 | T   | 1469.76 | 735.38 | 1452.73 | 726.87 | 1451.75 | 726.38 | 14    |
| 6  | 702.35  | 351.68 | 685.32  | 343.16 | 684.34  | 342.67 | Q   | 1368.71 | 684.86 | 1351.69 | 676.35 | 1350.7  | 675.85 | 13    |
| 7  | 789.38  | 395.19 | 772.35  | 386.68 | 771.37  | 386.19 | S   | 1240.65 | 620.83 | 1223.63 | 612.32 | 1222.64 | 611.82 | 12    |
| 8  | 886.43  | 443.72 | 869.41  | 435.21 | 868.42  | 434.72 | P   | 1153.62 | 577.31 | 1136.59 | 568.8  | 1135.61 | 568.31 | 11    |
| 9  | 983.49  | 492.25 | 966.46  | 483.73 | 965.48  | 483.24 | P   | 1056.57 | 528.79 | 1039.54 | 520.27 | 1038.56 | 519.78 | 10    |
| 10 | 1084.53 | 542.77 | 1067.51 | 534.26 | 1066.52 | 533.77 | T   | 959.52  | 480.26 | 942.49  | 471.75 | 941.51  | 471.26 | 9     |

|    |         |        |         |        |         |        |   |        |        |        |        |        |        |   |
|----|---------|--------|---------|--------|---------|--------|---|--------|--------|--------|--------|--------|--------|---|
| 11 | 1197.62 | 599.31 | 1180.59 | 590.8  | 1179.61 | 590.31 | L | 858.47 | 429.74 | 841.44 | 421.22 | 840.46 | 420.73 | 8 |
| 12 | 1284.65 | 642.83 | 1267.62 | 634.32 | 1266.64 | 633.82 | S | 745.38 | 373.2  | 728.36 | 364.68 | 727.37 | 364.19 | 7 |
| 13 | 1397.73 | 699.37 | 1380.71 | 690.86 | 1379.72 | 690.37 | L | 658.35 | 329.68 | 641.33 | 321.17 | 640.34 | 320.67 | 6 |
| 14 | 1484.77 | 742.89 | 1467.74 | 734.37 | 1466.76 | 733.88 | S | 545.27 | 273.14 | 528.24 | 264.62 | 527.26 | 264.13 | 5 |
| 15 | 1581.82 | 791.41 | 1564.79 | 782.9  | 1563.81 | 782.41 | P | 458.24 | 229.62 | 441.21 | 221.11 | 440.23 | 220.62 | 4 |
| 16 | 1638.84 | 819.92 | 1621.81 | 811.41 | 1620.83 | 810.92 | G | 361.18 | 181.1  | 344.16 | 172.58 | 343.17 | 172.09 | 3 |
| 17 | 1767.88 | 884.45 | 1750.86 | 875.93 | 1749.87 | 875.44 | E | 304.16 | 152.58 | 287.13 | 144.07 | 286.15 | 143.58 | 2 |
| 18 |         |        |         |        |         |        | R | 175.12 | 88.06  | 158.09 | 79.55  |        |        | 1 |

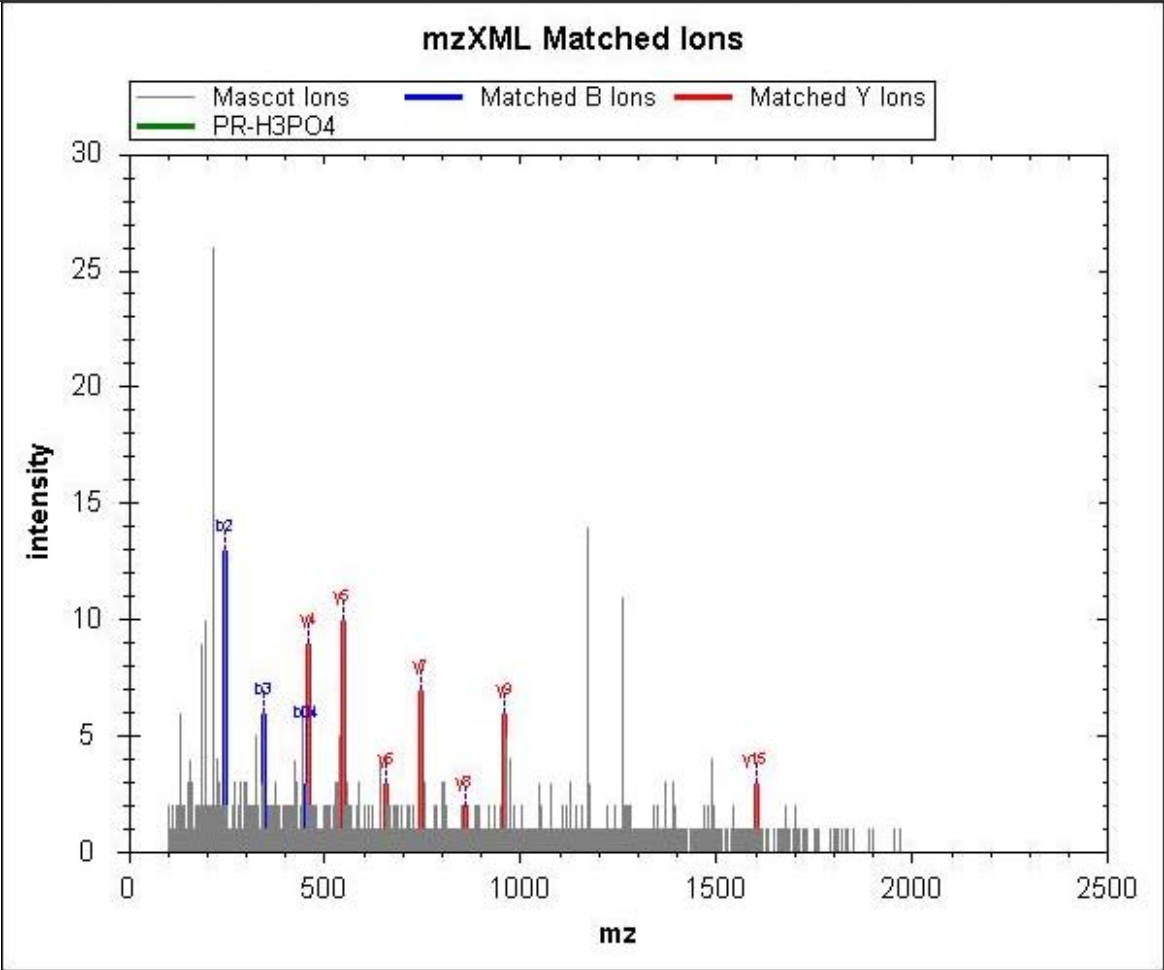

Protein index=1240, ACC No: IPI00005038

Peptide index=5664 MS/MS spectrum

Sequence: TTVLLADINDFNTVNEIYK, m/z:1092.068, charge:+ 2, Modification: , Mod Position:

Score: 48, Raw data:WET\_A5\_090615\_03.mzxml, MS/MS Elution time: 76.54984, Scan number:4241, Mass delta:0.0065, Rank:1

| No | b      | b++    | b* | b*++ | b0     | b0++   | Seq | y       | y++     | y*      | y*++    | y0      | y0++    | RevNo |
|----|--------|--------|----|------|--------|--------|-----|---------|---------|---------|---------|---------|---------|-------|
| 1  | 102.05 | 51.53  |    |      | 84.04  | 42.53  | T   |         |         |         |         |         |         | 19    |
| 2  | 203.1  | 102.05 |    |      | 185.09 | 93.05  | T   | 2082.08 | 1041.54 | 2065.05 | 1033.03 | 2064.06 | 1032.54 | 18    |
| 3  | 302.17 | 151.59 |    |      | 284.16 | 142.58 | V   | 1981.03 | 991.02  | 1964    | 982.5   | 1963.02 | 982.01  | 17    |
| 4  | 415.26 | 208.13 |    |      | 397.24 | 199.13 | L   | 1881.96 | 941.48  | 1864.93 | 932.97  | 1863.95 | 932.48  | 16    |

|    |         |         |         |        |         |         |   |         |        |         |        |         |        |    |
|----|---------|---------|---------|--------|---------|---------|---|---------|--------|---------|--------|---------|--------|----|
| 5  | 528.34  | 264.67  |         |        | 510.33  | 255.67  | L | 1768.88 | 884.94 | 1751.85 | 876.43 | 1750.86 | 875.94 | 15 |
| 6  | 599.38  | 300.19  |         |        | 581.37  | 291.19  | A | 1655.79 | 828.4  | 1638.76 | 819.89 | 1637.78 | 819.39 | 14 |
| 7  | 714.4   | 357.71  |         |        | 696.39  | 348.7   | D | 1584.75 | 792.88 | 1567.73 | 784.37 | 1566.74 | 783.88 | 13 |
| 8  | 827.49  | 414.25  |         |        | 809.48  | 405.24  | I | 1469.73 | 735.37 | 1452.7  | 726.85 | 1451.72 | 726.36 | 12 |
| 9  | 941.53  | 471.27  | 924.5   | 462.76 | 923.52  | 462.26  | N | 1356.64 | 678.83 | 1339.62 | 670.31 | 1338.63 | 669.82 | 11 |
| 10 | 1056.56 | 528.78  | 1039.53 | 520.27 | 1038.55 | 519.78  | D | 1242.6  | 621.8  | 1225.57 | 613.29 | 1224.59 | 612.8  | 10 |
| 11 | 1203.63 | 602.32  | 1186.6  | 593.8  | 1185.61 | 593.31  | F | 1127.57 | 564.29 | 1110.55 | 555.78 | 1109.56 | 555.28 | 9  |
| 12 | 1317.67 | 659.34  | 1300.64 | 650.82 | 1299.66 | 650.33  | N | 980.5   | 490.76 | 963.48  | 482.24 | 962.49  | 481.75 | 8  |
| 13 | 1418.72 | 709.86  | 1401.69 | 701.35 | 1400.71 | 700.86  | T | 866.46  | 433.73 | 849.44  | 425.22 | 848.45  | 424.73 | 7  |
| 14 | 1517.78 | 759.4   | 1500.76 | 750.88 | 1499.77 | 750.39  | V | 765.41  | 383.21 | 748.39  | 374.7  | 747.4   | 374.21 | 6  |
| 15 | 1631.83 | 816.42  | 1614.8  | 807.9  | 1613.82 | 807.41  | N | 666.35  | 333.68 | 649.32  | 325.16 | 648.34  | 324.67 | 5  |
| 16 | 1760.87 | 880.94  | 1743.84 | 872.43 | 1742.86 | 871.93  | E | 552.3   | 276.65 | 535.28  | 268.14 | 534.29  | 267.65 | 4  |
| 17 | 1873.95 | 937.48  | 1856.93 | 928.97 | 1855.94 | 928.48  | I | 423.26  | 212.13 | 406.23  | 203.62 |         |        | 3  |
| 18 | 2037.02 | 1019.01 | 2019.99 | 1010.5 | 2019.01 | 1010.01 | Y | 310.18  | 155.59 | 293.15  | 147.08 |         |        | 2  |
| 19 |         |         |         |        |         |         | K | 147.11  | 74.06  | 130.09  | 65.55  |         |        | 1  |

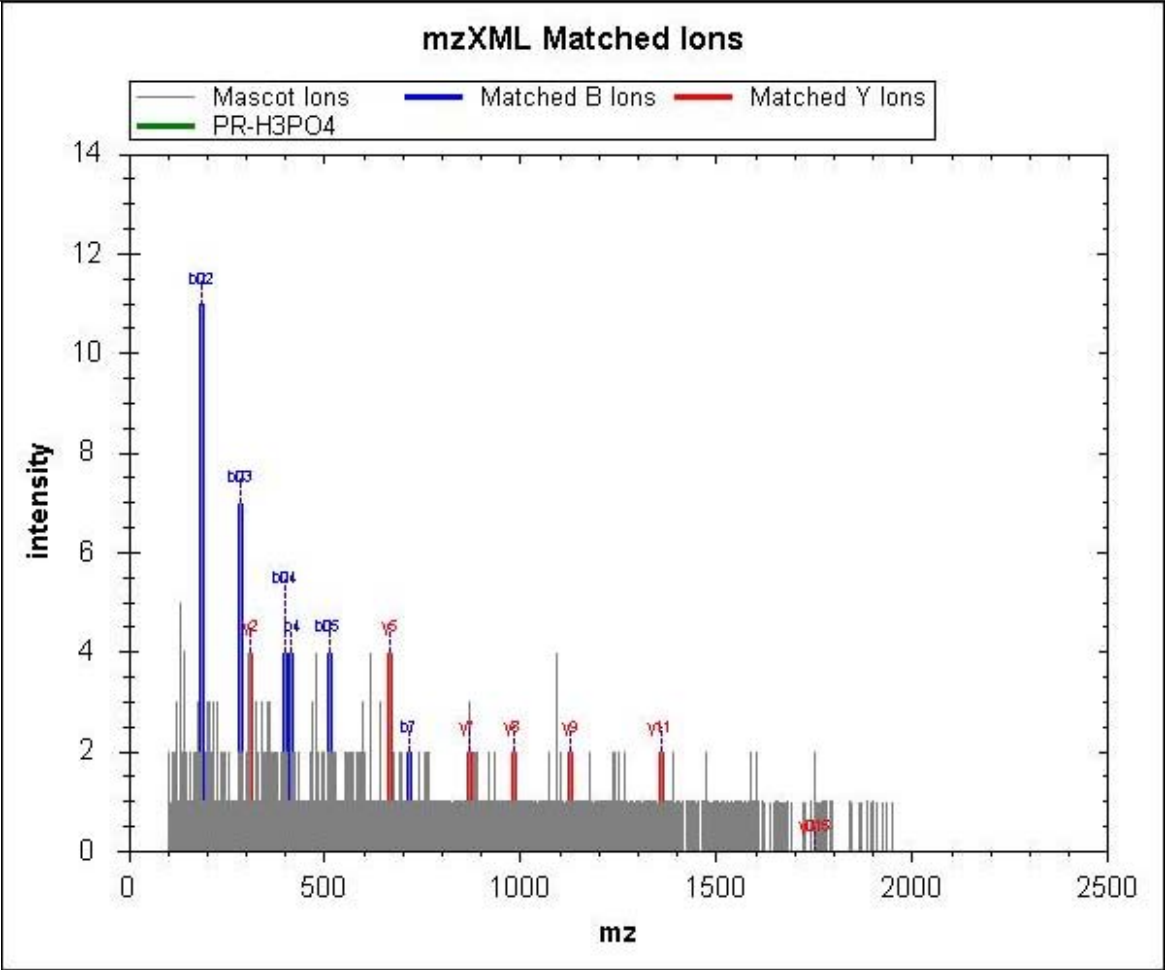

Protein index=1241, ACC No: IPI00011217

Peptide index=3950 MS/MS spectrum

Sequence: LDITTLTGVP EEHIK, m/z:555.9685, charge:+ 3, Modification: , Mod Position:

Score: 40.54, Raw data:WET\_A5\_090615\_03.mzxml, MS/MS Elution time: 57.61, Scan number:3132, Mass

delta:-0.0148, Rank:1

| No | b       | b++    | b0      | b0++   | Seq | y       | y++    | y*      | y*++   | y0      | y0++   | RevNo |
|----|---------|--------|---------|--------|-----|---------|--------|---------|--------|---------|--------|-------|
| 1  | 114.09  | 57.55  |         |        | L   |         |        |         |        |         |        | 15    |
| 2  | 229.12  | 115.06 | 211.11  | 106.06 | D   | 1552.82 | 776.91 | 1535.8  | 768.4  | 1534.81 | 767.91 | 14    |
| 3  | 342.2   | 171.6  | 324.19  | 162.6  | I   | 1437.79 | 719.4  | 1420.77 | 710.89 | 1419.78 | 710.4  | 13    |
| 4  | 443.25  | 222.13 | 425.24  | 213.12 | T   | 1324.71 | 662.86 | 1307.68 | 654.35 | 1306.7  | 653.85 | 12    |
| 5  | 544.3   | 272.65 | 526.29  | 263.65 | T   | 1223.66 | 612.34 | 1206.64 | 603.82 | 1205.65 | 603.33 | 11    |
| 6  | 657.38  | 329.19 | 639.37  | 320.19 | L   | 1122.62 | 561.81 | 1105.59 | 553.3  | 1104.6  | 552.81 | 10    |
| 7  | 758.43  | 379.72 | 740.42  | 370.71 | T   | 1009.53 | 505.27 | 992.5   | 496.76 | 991.52  | 496.26 | 9     |
| 8  | 815.45  | 408.23 | 797.44  | 399.22 | G   | 908.48  | 454.75 | 891.46  | 446.23 | 890.47  | 445.74 | 8     |
| 9  | 914.52  | 457.76 | 896.51  | 448.76 | V   | 851.46  | 426.23 | 834.44  | 417.72 | 833.45  | 417.23 | 7     |
| 10 | 1011.57 | 506.29 | 993.56  | 497.28 | P   | 752.39  | 376.7  | 735.37  | 368.19 | 734.38  | 367.7  | 6     |
| 11 | 1140.61 | 570.81 | 1122.6  | 561.81 | E   | 655.34  | 328.17 | 638.31  | 319.66 | 637.33  | 319.17 | 5     |
| 12 | 1269.66 | 635.33 | 1251.65 | 626.33 | E   | 526.3   | 263.65 | 509.27  | 255.14 | 508.29  | 254.65 | 4     |
| 13 | 1406.72 | 703.86 | 1388.71 | 694.86 | H   | 397.26  | 199.13 | 380.23  | 190.62 |         |        | 3     |
| 14 | 1519.8  | 760.4  | 1501.79 | 751.4  | I   | 260.2   | 130.6  | 243.17  | 122.09 |         |        | 2     |
| 15 |         |        |         |        | K   | 147.11  | 74.06  | 130.09  | 65.55  |         |        | 1     |

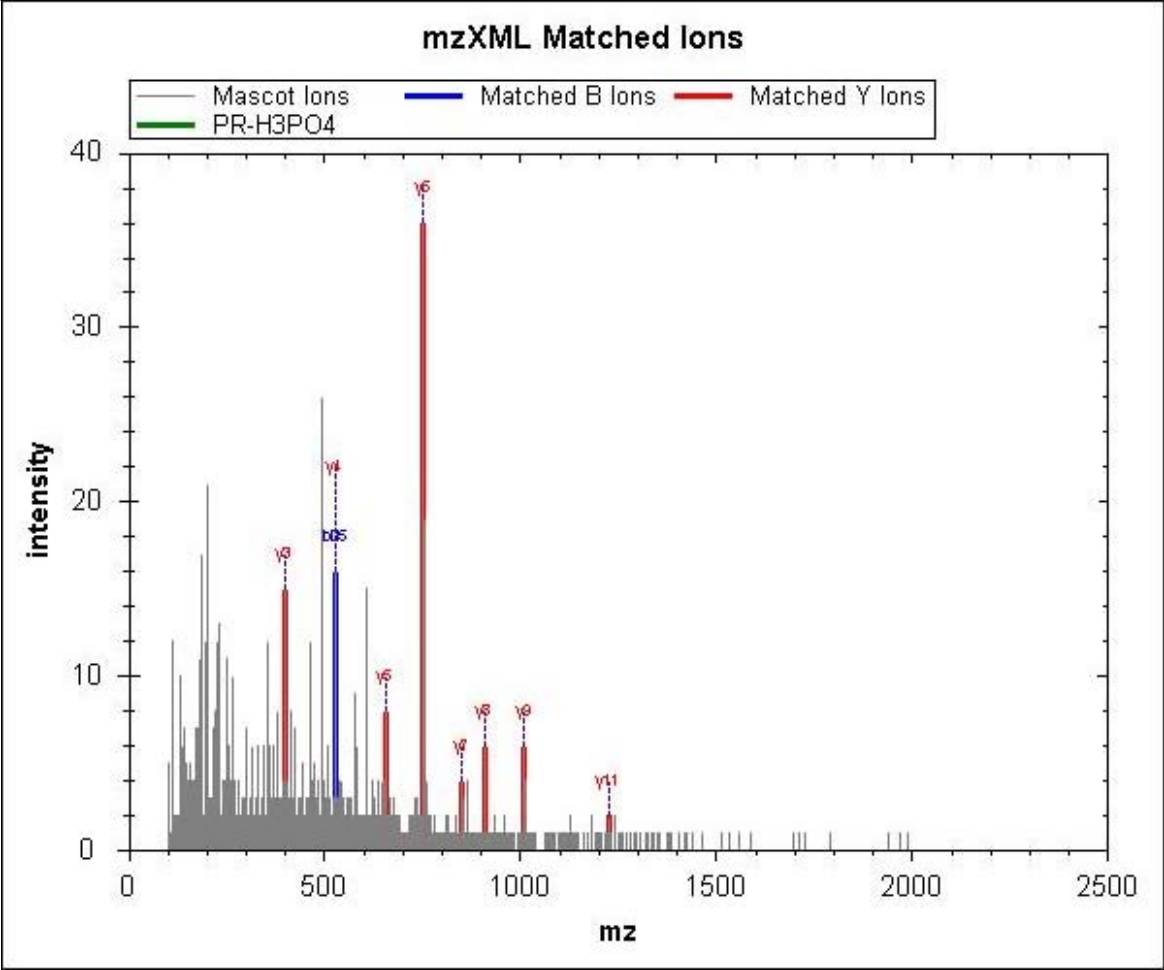

Protein index=1242, ACC No:IP100007175

Peptide index=4079 MS/MS spectrum

Sequence: KVDPMAIVVFHQADIGEYVR, m/z:768.3934, charge:+ 3, Modification: Oxidation (M), Mod Position: 0.00001000000000000000.0

Score: 88.37, Raw data:WET\_B5\_090616\_01.mzxml, MS/MS Elution time: 59.00134, Scan number:3200, Mass delta:-0.011, Rank:1

| No | b       | b++     | b*      | b*++    | b0      | b0++    | Seq | y       | y++     | y*      | y*++    | y0      | y0++    | RevNo |
|----|---------|---------|---------|---------|---------|---------|-----|---------|---------|---------|---------|---------|---------|-------|
| 1  | 129.1   | 65.05   | 112.08  | 56.54   |         |         | K   |         |         |         |         |         |         | 20    |
| 2  | 228.17  | 114.59  | 211.14  | 106.08  |         |         | V   | 2175.09 | 1088.05 | 2158.06 | 1079.54 | 2157.08 | 1079.04 | 19    |
| 3  | 343.2   | 172.1   | 326.17  | 163.59  | 325.19  | 163.1   | D   | 2076.02 | 1038.51 | 2059    | 1030    | 2058.01 | 1029.51 | 18    |
| 4  | 440.25  | 220.63  | 423.22  | 212.12  | 422.24  | 211.62  | P   | 1960.99 | 981     | 1943.97 | 972.49  | 1942.98 | 972     | 17    |
| 5  | 587.29  | 294.15  | 570.26  | 285.63  | 569.28  | 285.14  | M   | 1863.94 | 932.47  | 1846.92 | 923.96  | 1845.93 | 923.47  | 16    |
| 6  | 658.32  | 329.67  | 641.3   | 321.15  | 640.31  | 320.66  | A   | 1716.91 | 858.96  | 1699.88 | 850.44  | 1698.9  | 849.95  | 15    |
| 7  | 771.41  | 386.21  | 754.38  | 377.69  | 753.4   | 377.2   | I   | 1645.87 | 823.44  | 1628.84 | 814.93  | 1627.86 | 814.43  | 14    |
| 8  | 870.48  | 435.74  | 853.45  | 427.23  | 852.46  | 426.74  | V   | 1532.79 | 766.9   | 1515.76 | 758.38  | 1514.77 | 757.89  | 13    |
| 9  | 969.54  | 485.28  | 952.52  | 476.76  | 951.53  | 476.27  | V   | 1433.72 | 717.36  | 1416.69 | 708.85  | 1415.71 | 708.36  | 12    |
| 10 | 1116.61 | 558.81  | 1099.59 | 550.3   | 1098.6  | 549.8   | F   | 1334.65 | 667.83  | 1317.62 | 659.31  | 1316.64 | 658.82  | 11    |
| 11 | 1253.67 | 627.34  | 1236.64 | 618.83  | 1235.66 | 618.33  | H   | 1187.58 | 594.29  | 1170.55 | 585.78  | 1169.57 | 585.29  | 10    |
| 12 | 1381.73 | 691.37  | 1364.7  | 682.86  | 1363.72 | 682.36  | Q   | 1050.52 | 525.76  | 1033.49 | 517.25  | 1032.51 | 516.76  | 9     |
| 13 | 1452.77 | 726.89  | 1435.74 | 718.37  | 1434.76 | 717.88  | A   | 922.46  | 461.74  | 905.44  | 453.22  | 904.45  | 452.73  | 8     |
| 14 | 1567.79 | 784.4   | 1550.77 | 775.89  | 1549.78 | 775.4   | D   | 851.43  | 426.22  | 834.4   | 417.7   | 833.42  | 417.21  | 7     |
| 15 | 1680.88 | 840.94  | 1663.85 | 832.43  | 1662.87 | 831.94  | I   | 736.4   | 368.7   | 719.37  | 360.19  | 718.39  | 359.7   | 6     |
| 16 | 1737.9  | 869.45  | 1720.87 | 860.94  | 1719.89 | 860.45  | G   | 623.31  | 312.16  | 606.29  | 303.65  | 605.3   | 303.16  | 5     |
| 17 | 1866.94 | 933.97  | 1849.92 | 925.46  | 1848.93 | 924.97  | E   | 566.29  | 283.65  | 549.27  | 275.14  | 548.28  | 274.64  | 4     |
| 18 | 2030.01 | 1015.51 | 2012.98 | 1006.99 | 2011.99 | 1006.5  | Y   | 437.25  | 219.13  | 420.22  | 210.62  |         |         | 3     |
| 19 | 2129.07 | 1065.04 | 2112.05 | 1056.53 | 2111.06 | 1056.04 | V   | 274.19  | 137.6   | 257.16  | 129.08  |         |         | 2     |
| 20 |         |         |         |         |         |         | R   | 175.12  | 88.06   | 158.09  | 79.55   |         |         | 1     |

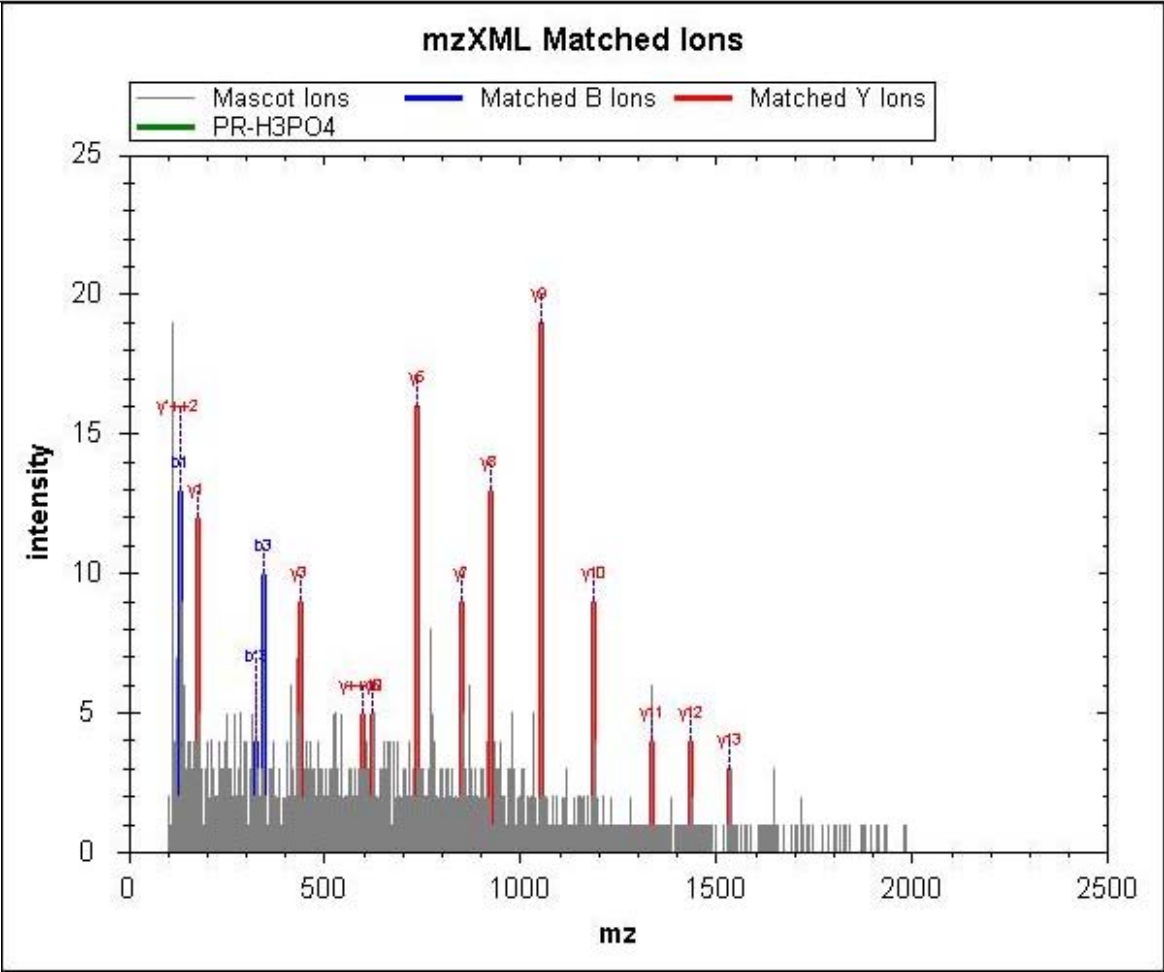

Protein index=1243, ACC No: IPI00028376

Peptide index=4195 MS/MS spectrum

Sequence: FIDTSQFILNR, m/z:677.3611, charge:+ 2, Modification: , Mod Position:

Score: 55.41, Raw data:WET\_A5\_090615\_03.mzxml, MS/MS Elution time: 60.01833, Scan number:3273, Mass delta:-0.0011, Rank:1

| No | b       | b++    | b*      | b*++   | b0      | b0++   | Seq | y       | y++    | y*      | y*++   | y0      | y0++   | RevNo |
|----|---------|--------|---------|--------|---------|--------|-----|---------|--------|---------|--------|---------|--------|-------|
| 1  | 148.08  | 74.54  |         |        |         |        | F   |         |        |         |        |         |        | 11    |
| 2  | 261.16  | 131.08 |         |        |         |        | I   | 1206.65 | 603.83 | 1189.62 | 595.31 | 1188.64 | 594.82 | 10    |
| 3  | 376.19  | 188.6  |         |        | 358.18  | 179.59 | D   | 1093.56 | 547.29 | 1076.54 | 538.77 | 1075.55 | 538.28 | 9     |
| 4  | 477.23  | 239.12 |         |        | 459.22  | 230.12 | T   | 978.54  | 489.77 | 961.51  | 481.26 | 960.53  | 480.77 | 8     |
| 5  | 564.27  | 282.64 |         |        | 546.26  | 273.63 | S   | 877.49  | 439.25 | 860.46  | 430.73 | 859.48  | 430.24 | 7     |
| 6  | 692.32  | 346.67 | 675.3   | 338.15 | 674.31  | 337.66 | Q   | 790.46  | 395.73 | 773.43  | 387.22 |         |        | 6     |
| 7  | 839.39  | 420.2  | 822.37  | 411.69 | 821.38  | 411.2  | F   | 662.4   | 331.7  | 645.37  | 323.19 |         |        | 5     |
| 8  | 952.48  | 476.74 | 935.45  | 468.23 | 934.47  | 467.74 | I   | 515.33  | 258.17 | 498.3   | 249.66 |         |        | 4     |
| 9  | 1065.56 | 533.28 | 1048.54 | 524.77 | 1047.55 | 524.28 | L   | 402.25  | 201.63 | 385.22  | 193.11 |         |        | 3     |
| 10 | 1179.6  | 590.31 | 1162.58 | 581.79 | 1161.59 | 581.3  | N   | 289.16  | 145.08 | 272.14  | 136.57 |         |        | 2     |
| 11 |         |        |         |        |         |        | R   | 175.12  | 88.06  | 158.09  | 79.55  |         |        | 1     |

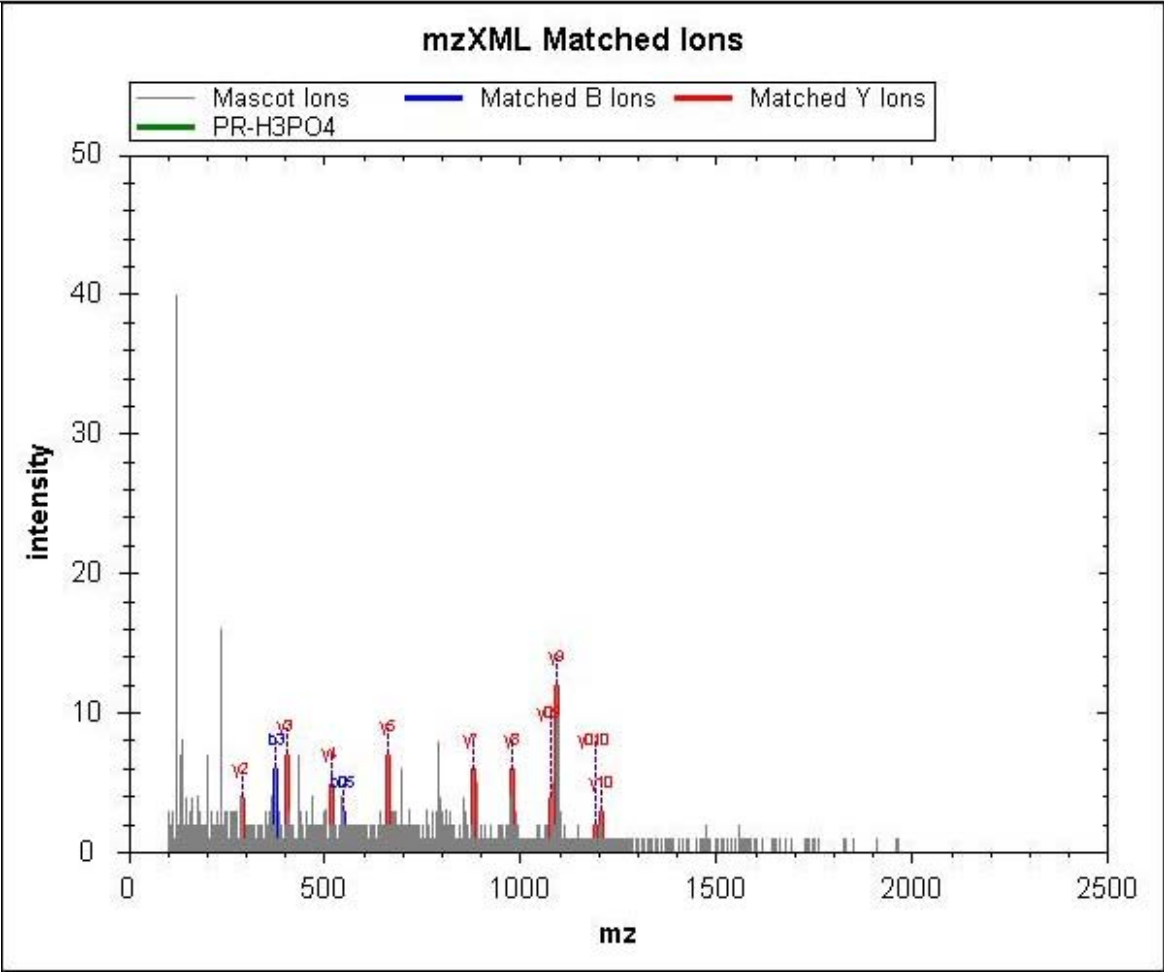

Protein index=1244, ACC No: IPI00007730

Peptide index=7173 MS/MS spectrum

Sequence: TFGIWTLSSVIR, m/z: 746.9233, charge: + 2, Modification: , Mod Position:

Score: 49.1, Raw data: WET\_B5\_090616\_03.mzxml, MS/MS Elution time: 110.1137, Scan number: 6226, Mass delta: 0.0081, Rank: 1

| No | b       | b++    | b0      | b0++   | Seq | y       | y++    | y*      | y*++   | y0      | y0++   | RevNo |
|----|---------|--------|---------|--------|-----|---------|--------|---------|--------|---------|--------|-------|
| 1  | 102.05  | 51.53  | 84.04   | 42.53  | T   |         |        |         |        |         |        | 13    |
| 2  | 249.12  | 125.07 | 231.11  | 116.06 | F   | 1391.8  | 696.41 | 1374.78 | 687.89 | 1373.79 | 687.4  | 12    |
| 3  | 306.14  | 153.58 | 288.13  | 144.57 | G   | 1244.74 | 622.87 | 1227.71 | 614.36 | 1226.73 | 613.87 | 11    |
| 4  | 419.23  | 210.12 | 401.22  | 201.11 | I   | 1187.71 | 594.36 | 1170.69 | 585.85 | 1169.7  | 585.36 | 10    |
| 5  | 605.31  | 303.16 | 587.3   | 294.15 | W   | 1074.63 | 537.82 | 1057.6  | 529.31 | 1056.62 | 528.81 | 9     |
| 6  | 706.36  | 353.68 | 688.35  | 344.68 | T   | 888.55  | 444.78 | 871.52  | 436.27 | 870.54  | 435.77 | 8     |
| 7  | 819.44  | 410.22 | 801.43  | 401.22 | L   | 787.5   | 394.26 | 770.48  | 385.74 | 769.49  | 385.25 | 7     |
| 8  | 932.52  | 466.77 | 914.51  | 457.76 | L   | 674.42  | 337.71 | 657.39  | 329.2  | 656.41  | 328.71 | 6     |
| 9  | 1019.56 | 510.28 | 1001.55 | 501.28 | S   | 561.34  | 281.17 | 544.31  | 272.66 | 543.32  | 272.17 | 5     |
| 10 | 1106.59 | 553.8  | 1088.58 | 544.79 | S   | 474.3   | 237.66 | 457.28  | 229.14 | 456.29  | 228.65 | 4     |
| 11 | 1205.66 | 603.33 | 1187.65 | 594.33 | V   | 387.27  | 194.14 | 370.24  | 185.63 |         |        | 3     |
| 12 | 1318.74 | 659.87 | 1300.73 | 650.87 | I   | 288.2   | 144.61 | 271.18  | 136.09 |         |        | 2     |

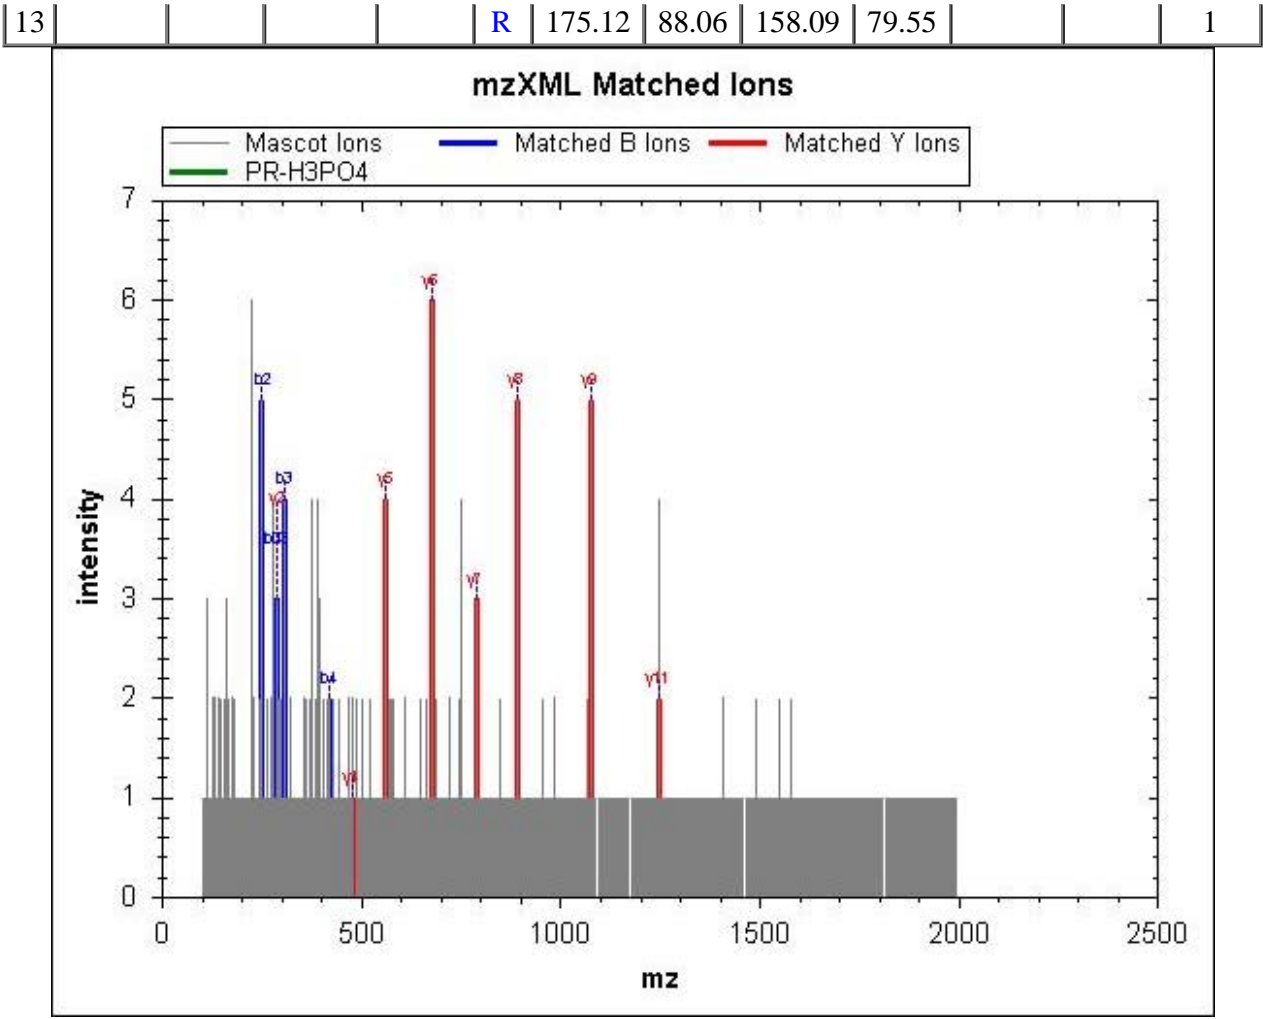

Protein index=1245, ACC No:IP100179700

Peptide index=1123 MS/MS spectrum

Sequence: KQPPVSPGTALVGSQK, m/z:531.9663, charge:+ 3, Modification: , Mod Position:

Score: 71.36, Raw data:WET\_B5\_090616\_01.mzxml, MS/MS Elution time: 29.78167, Scan number:1503, Mass delta:-0.0069, Rank:1

| No | b       | b++    | b*      | b*++   | b0     | b0++   | Seq | y       | y++    | y*      | y*++   | y0      | y0++   | RevNo |
|----|---------|--------|---------|--------|--------|--------|-----|---------|--------|---------|--------|---------|--------|-------|
| 1  | 129.1   | 65.05  | 112.08  | 56.54  |        |        | K   |         |        |         |        |         |        | 16    |
| 2  | 257.16  | 129.08 | 240.13  | 120.57 |        |        | Q   | 1465.8  | 733.4  | 1448.77 | 724.89 | 1447.79 | 724.4  | 15    |
| 3  | 354.21  | 177.61 | 337.19  | 169.1  |        |        | P   | 1337.74 | 669.37 | 1320.72 | 660.86 | 1319.73 | 660.37 | 14    |
| 4  | 451.27  | 226.14 | 434.24  | 217.62 |        |        | P   | 1240.69 | 620.85 | 1223.66 | 612.34 | 1222.68 | 611.84 | 13    |
| 5  | 550.33  | 275.67 | 533.31  | 267.16 |        |        | V   | 1143.64 | 572.32 | 1126.61 | 563.81 | 1125.63 | 563.32 | 12    |
| 6  | 637.37  | 319.19 | 620.34  | 310.67 | 619.36 | 310.18 | S   | 1044.57 | 522.79 | 1027.54 | 514.27 | 1026.56 | 513.78 | 11    |
| 7  | 734.42  | 367.71 | 717.39  | 359.2  | 716.41 | 358.71 | P   | 957.54  | 479.27 | 940.51  | 470.76 | 939.53  | 470.27 | 10    |
| 8  | 791.44  | 396.22 | 774.41  | 387.71 | 773.43 | 387.22 | G   | 860.48  | 430.75 | 843.46  | 422.23 | 842.47  | 421.74 | 9     |
| 9  | 892.49  | 446.75 | 875.46  | 438.23 | 874.48 | 437.74 | T   | 803.46  | 402.23 | 786.44  | 393.72 | 785.45  | 393.23 | 8     |
| 10 | 963.53  | 482.27 | 946.5   | 473.75 | 945.52 | 473.26 | A   | 702.41  | 351.71 | 685.39  | 343.2  | 684.4   | 342.71 | 7     |
| 11 | 1076.61 | 538.81 | 1059.58 | 530.3  | 1058.6 | 529.8  | L   | 631.38  | 316.19 | 614.35  | 307.68 | 613.37  | 307.19 | 6     |

file:///G:/新資料夾 (3)/SingleHitProteins.html[2009/7/22 上午 08:30:59]

|    |         |        |         |        |         |        |   |         |        |         |        |         |        |    |
|----|---------|--------|---------|--------|---------|--------|---|---------|--------|---------|--------|---------|--------|----|
| 8  | 855.42  | 428.21 | 838.39  | 419.7  | 837.41  | 419.21 | G | 1131.64 | 566.32 | 1114.61 | 557.81 | 1113.63 | 557.32 | 11 |
| 9  | 968.5   | 484.76 | 951.48  | 476.24 | 950.49  | 475.75 | L | 1074.62 | 537.81 | 1057.59 | 529.3  | 1056.6  | 528.81 | 10 |
| 10 | 1083.53 | 542.27 | 1066.51 | 533.76 | 1065.52 | 533.26 | D | 961.53  | 481.27 | 944.5   | 472.76 | 943.52  | 472.26 | 9  |
| 11 | 1154.57 | 577.79 | 1137.54 | 569.27 | 1136.56 | 568.78 | A | 846.5   | 423.76 | 829.48  | 415.24 | 828.49  | 414.75 | 8  |
| 12 | 1267.65 | 634.33 | 1250.63 | 625.82 | 1249.64 | 625.32 | L | 775.47  | 388.24 | 758.44  | 379.72 | 757.46  | 379.23 | 7  |
| 13 | 1354.68 | 677.85 | 1337.66 | 669.33 | 1336.67 | 668.84 | S | 662.38  | 331.7  | 645.36  | 323.18 | 644.37  | 322.69 | 6  |
| 14 | 1441.72 | 721.36 | 1424.69 | 712.85 | 1423.71 | 712.36 | S | 575.35  | 288.18 | 558.32  | 279.67 | 557.34  | 279.17 | 5  |
| 15 | 1554.8  | 777.9  | 1537.77 | 769.39 | 1536.79 | 768.9  | I | 488.32  | 244.66 | 471.29  | 236.15 | 470.31  | 235.66 | 4  |
| 16 | 1667.89 | 834.45 | 1650.86 | 825.93 | 1649.87 | 825.44 | I | 375.24  | 188.12 | 358.21  | 179.61 | 357.22  | 179.12 | 3  |
| 17 | 1754.92 | 877.96 | 1737.89 | 869.45 | 1736.91 | 868.96 | S | 262.15  | 131.58 | 245.12  | 123.07 | 244.14  | 122.57 | 2  |
| 18 |         |        |         |        |         |        | R | 175.12  | 88.06  | 158.09  | 79.55  |         |        | 1  |

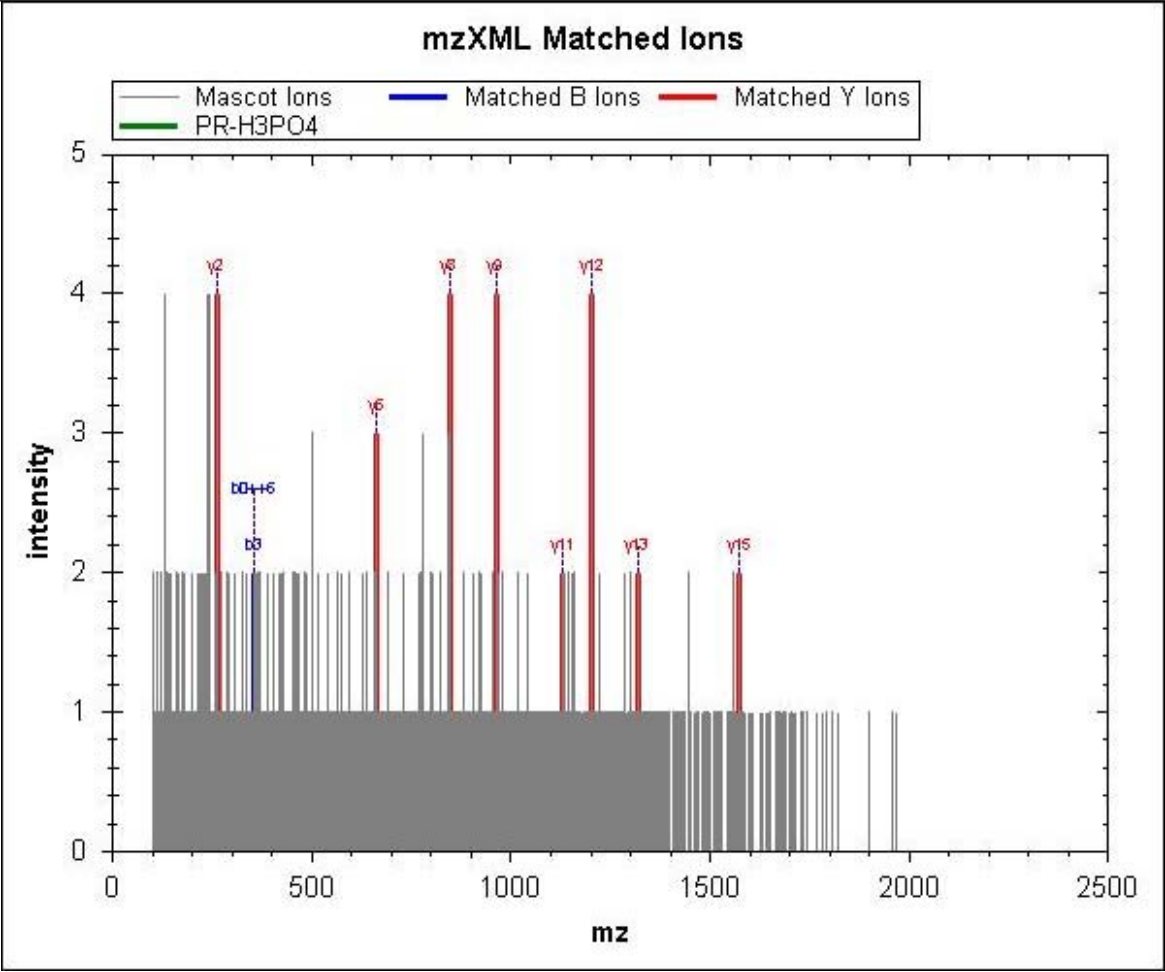

Protein index=1250, ACC No: IPI00000005

Peptide index=4816 MS/MS spectrum

Sequence: QGVEDAFYTLVR, m/z:699.3567, charge:+ 2, Modification: , Mod Position:

Score: 94.98, Raw data:WET\_A5\_090615\_03.mzxml, MS/MS Elution time: 65.99767, Scan number:3623, Mass delta:0.0001, Rank:1

| No | b      | b++   | b*     | b*++  | b0 | b0++ | Seq | y | y++ | y* | y*++ | y0 | y0++ | RevNo |
|----|--------|-------|--------|-------|----|------|-----|---|-----|----|------|----|------|-------|
| 1  | 129.07 | 65.04 | 112.04 | 56.52 |    |      | Q   |   |     |    |      |    |      | 12    |

|    |         |        |         |        |         |        |   |         |        |         |        |         |        |    |
|----|---------|--------|---------|--------|---------|--------|---|---------|--------|---------|--------|---------|--------|----|
| 2  | 186.09  | 93.55  | 169.06  | 85.03  |         |        | G | 1269.65 | 635.33 | 1252.62 | 626.81 | 1251.64 | 626.32 | 11 |
| 3  | 285.16  | 143.08 | 268.13  | 134.57 |         |        | V | 1212.63 | 606.82 | 1195.6  | 598.3  | 1194.62 | 597.81 | 10 |
| 4  | 414.2   | 207.6  | 397.17  | 199.09 | 396.19  | 198.6  | E | 1113.56 | 557.28 | 1096.53 | 548.77 | 1095.55 | 548.28 | 9  |
| 5  | 529.23  | 265.12 | 512.2   | 256.6  | 511.21  | 256.11 | D | 984.51  | 492.76 | 967.49  | 484.25 | 966.5   | 483.76 | 8  |
| 6  | 600.26  | 300.63 | 583.24  | 292.12 | 582.25  | 291.63 | A | 869.49  | 435.25 | 852.46  | 426.73 | 851.48  | 426.24 | 7  |
| 7  | 747.33  | 374.17 | 730.3   | 365.66 | 729.32  | 365.16 | F | 798.45  | 399.73 | 781.42  | 391.22 | 780.44  | 390.72 | 6  |
| 8  | 910.39  | 455.7  | 893.37  | 447.19 | 892.38  | 446.7  | Y | 651.38  | 326.19 | 634.36  | 317.68 | 633.37  | 317.19 | 5  |
| 9  | 1011.44 | 506.22 | 994.42  | 497.71 | 993.43  | 497.22 | T | 488.32  | 244.66 | 471.29  | 236.15 | 470.31  | 235.66 | 4  |
| 10 | 1124.53 | 562.77 | 1107.5  | 554.25 | 1106.52 | 553.76 | L | 387.27  | 194.14 | 370.24  | 185.63 |         |        | 3  |
| 11 | 1223.59 | 612.3  | 1206.57 | 603.79 | 1205.58 | 603.3  | V | 274.19  | 137.6  | 257.16  | 129.08 |         |        | 2  |
| 12 |         |        |         |        |         |        | R | 175.12  | 88.06  | 158.09  | 79.55  |         |        | 1  |

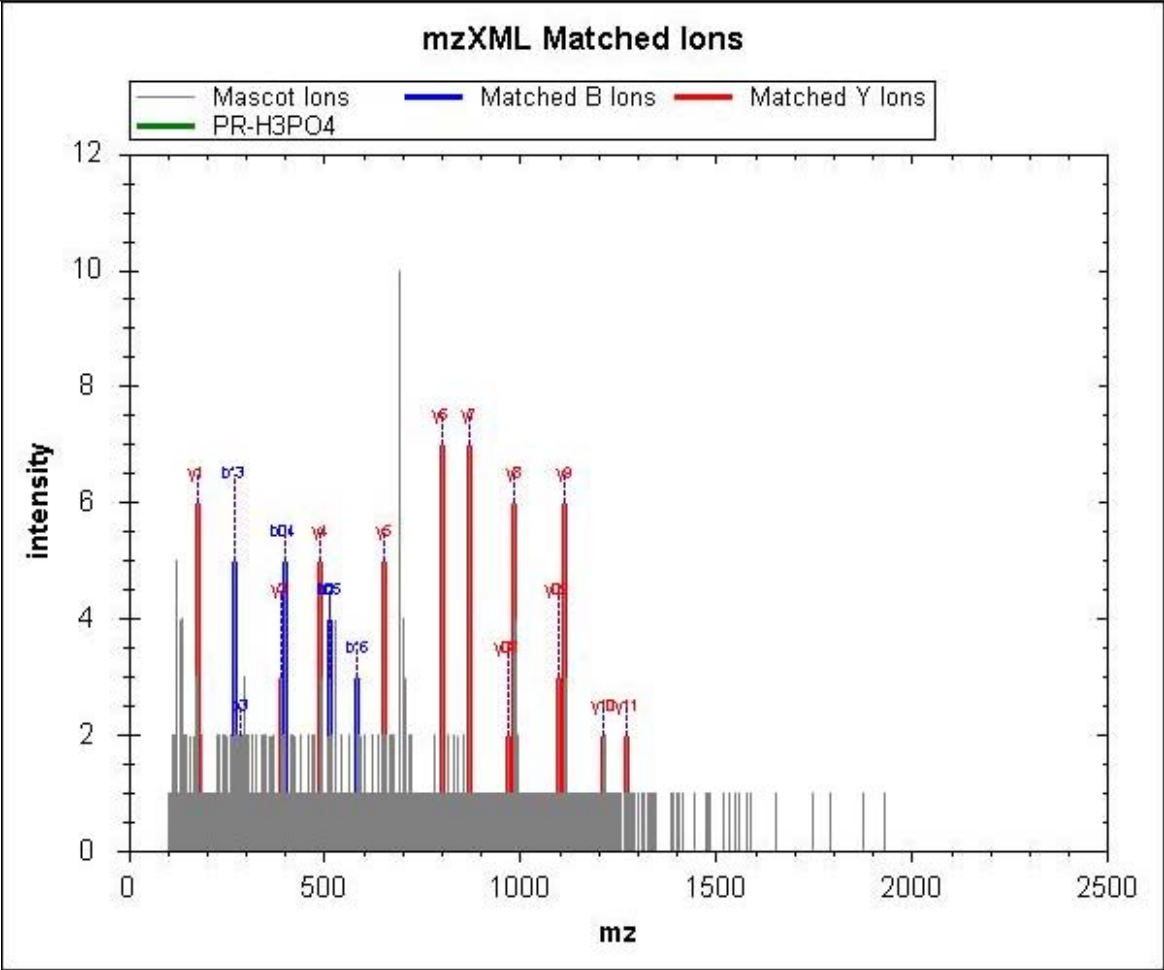

|    |         |        |         |        |   |         |        |         |        |         |        |    |
|----|---------|--------|---------|--------|---|---------|--------|---------|--------|---------|--------|----|
| 2  | 129.07  | 65.04  |         |        | A | 1142.62 | 571.81 | 1125.59 | 563.3  | 1124.61 | 562.81 | 10 |
| 3  | 242.15  | 121.58 |         |        | I | 1071.58 | 536.3  | 1054.56 | 527.78 | 1053.57 | 527.29 | 9  |
| 4  | 357.18  | 179.09 | 339.17  | 170.09 | D | 958.5   | 479.75 | 941.47  | 471.24 | 940.49  | 470.75 | 8  |
| 5  | 494.24  | 247.62 | 476.23  | 238.62 | H | 843.47  | 422.24 | 826.45  | 413.73 | 825.46  | 413.23 | 7  |
| 6  | 657.3   | 329.15 | 639.29  | 320.15 | Y | 706.41  | 353.71 | 689.39  | 345.2  | 688.4   | 344.71 | 6  |
| 7  | 756.37  | 378.69 | 738.36  | 369.68 | V | 543.35  | 272.18 | 526.32  | 263.67 | 525.34  | 263.17 | 5  |
| 8  | 857.42  | 429.21 | 839.4   | 420.21 | T | 444.28  | 222.64 | 427.26  | 214.13 | 426.27  | 213.64 | 4  |
| 9  | 954.47  | 477.74 | 936.46  | 468.73 | P | 343.23  | 172.12 | 326.21  | 163.61 |         |        | 3  |
| 10 | 1053.54 | 527.27 | 1035.53 | 518.27 | V | 246.18  | 123.59 | 229.15  | 115.08 |         |        | 2  |
| 11 |         |        |         |        | K | 147.11  | 74.06  | 130.09  | 65.55  |         |        | 1  |

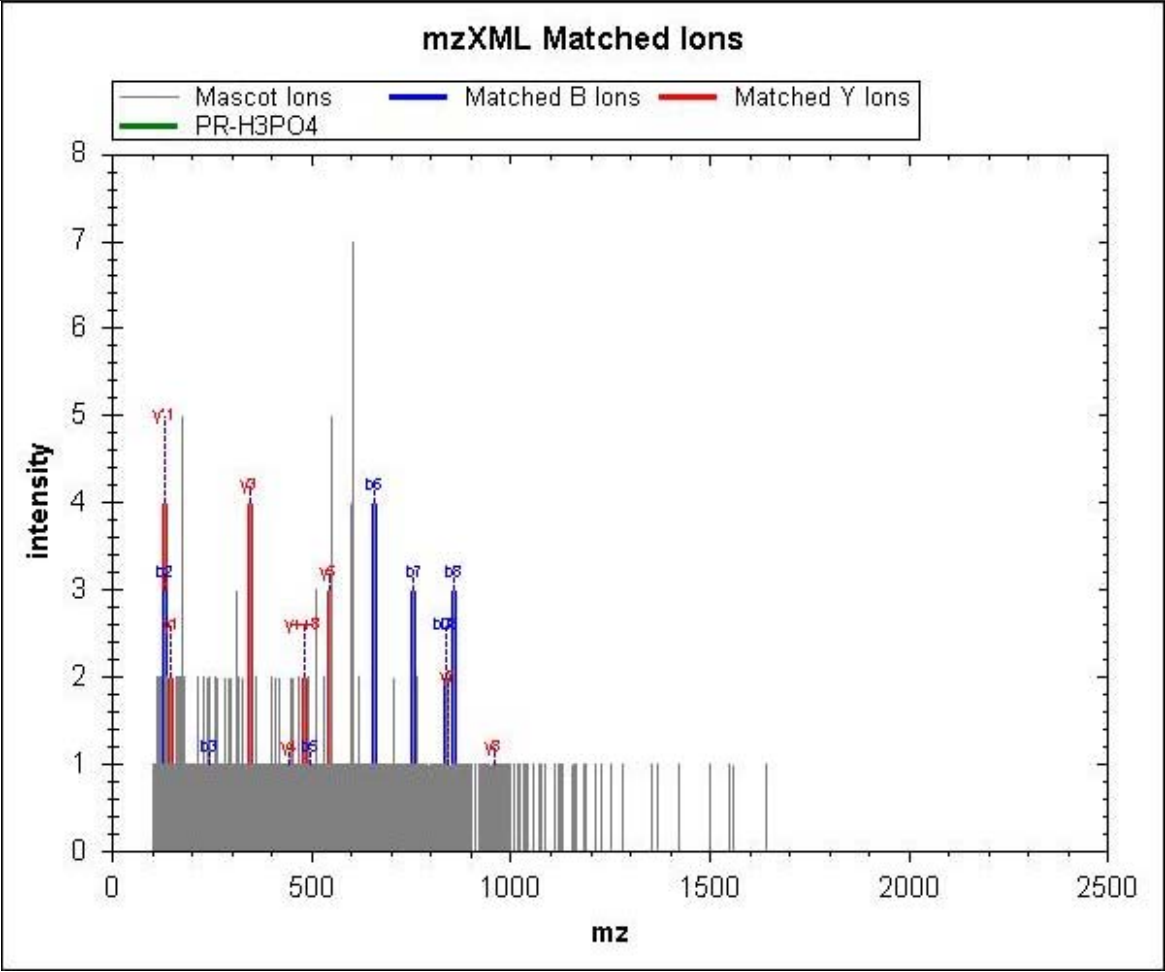

Protein index=1252, ACC No:IPI00220739

Peptide index=1605 MS/MS spectrum

Sequence: GDQPAASGDSDDDEPPPLPR, m/z:1018.451, charge:+ 2, Modification: , Mod Position:

Score: 75.62, Raw data:WET\_A5\_090615\_03.mzxml, MS/MS Elution time: 35.44533, Scan number:1834, Mass delta:0.0102, Rank:1

| No | b      | b++   | b* | b*++ | b0     | b0++  | Seq | y       | y++    | y*      | y*++   | y0      | y0++   | RevNo |
|----|--------|-------|----|------|--------|-------|-----|---------|--------|---------|--------|---------|--------|-------|
| 1  | 58.03  | 29.52 |    |      |        |       | G   |         |        |         |        |         |        | 20    |
| 2  | 173.06 | 87.03 |    |      | 155.05 | 78.03 | D   | 1978.86 | 989.93 | 1961.84 | 981.42 | 1960.85 | 980.93 | 19    |

|    |         |        |         |        |         |        |   |         |        |         |        |         |        |    |
|----|---------|--------|---------|--------|---------|--------|---|---------|--------|---------|--------|---------|--------|----|
| 3  | 301.11  | 151.06 | 284.09  | 142.55 | 283.1   | 142.06 | Q | 1863.84 | 932.42 | 1846.81 | 923.91 | 1845.82 | 923.42 | 18 |
| 4  | 398.17  | 199.59 | 381.14  | 191.07 | 380.16  | 190.58 | P | 1735.78 | 868.39 | 1718.75 | 859.88 | 1717.77 | 859.39 | 17 |
| 5  | 469.2   | 235.11 | 452.18  | 226.59 | 451.19  | 226.1  | A | 1638.72 | 819.87 | 1621.7  | 811.35 | 1620.71 | 810.86 | 16 |
| 6  | 540.24  | 270.62 | 523.21  | 262.11 | 522.23  | 261.62 | A | 1567.69 | 784.35 | 1550.66 | 775.83 | 1549.68 | 775.34 | 15 |
| 7  | 627.27  | 314.14 | 610.25  | 305.63 | 609.26  | 305.14 | S | 1496.65 | 748.83 | 1479.62 | 740.32 | 1478.64 | 739.82 | 14 |
| 8  | 684.29  | 342.65 | 667.27  | 334.14 | 666.28  | 333.65 | G | 1409.62 | 705.31 | 1392.59 | 696.8  | 1391.61 | 696.31 | 13 |
| 9  | 799.32  | 400.16 | 782.3   | 391.65 | 781.31  | 391.16 | D | 1352.6  | 676.8  | 1335.57 | 668.29 | 1334.59 | 667.8  | 12 |
| 10 | 886.35  | 443.68 | 869.33  | 435.17 | 868.34  | 434.68 | S | 1237.57 | 619.29 | 1220.54 | 610.78 | 1219.56 | 610.28 | 11 |
| 11 | 1001.38 | 501.19 | 984.35  | 492.68 | 983.37  | 492.19 | D | 1150.54 | 575.77 | 1133.51 | 567.26 | 1132.53 | 566.77 | 10 |
| 12 | 1116.41 | 558.71 | 1099.38 | 550.19 | 1098.4  | 549.7  | D | 1035.51 | 518.26 | 1018.48 | 509.75 | 1017.5  | 509.25 | 9  |
| 13 | 1231.43 | 616.22 | 1214.41 | 607.71 | 1213.42 | 607.22 | D | 920.48  | 460.75 | 903.46  | 452.23 | 902.47  | 451.74 | 8  |
| 14 | 1360.48 | 680.74 | 1343.45 | 672.23 | 1342.47 | 671.74 | E | 805.46  | 403.23 | 788.43  | 394.72 | 787.45  | 394.23 | 7  |
| 15 | 1457.53 | 729.27 | 1440.5  | 720.76 | 1439.52 | 720.26 | P | 676.41  | 338.71 | 659.39  | 330.2  |         |        | 6  |
| 16 | 1554.58 | 777.8  | 1537.56 | 769.28 | 1536.57 | 768.79 | P | 579.36  | 290.18 | 562.33  | 281.67 |         |        | 5  |
| 17 | 1651.64 | 826.32 | 1634.61 | 817.81 | 1633.62 | 817.32 | P | 482.31  | 241.66 | 465.28  | 233.14 |         |        | 4  |
| 18 | 1764.72 | 882.86 | 1747.69 | 874.35 | 1746.71 | 873.86 | L | 385.26  | 193.13 | 368.23  | 184.62 |         |        | 3  |
| 19 | 1861.77 | 931.39 | 1844.75 | 922.88 | 1843.76 | 922.38 | P | 272.17  | 136.59 | 255.15  | 128.08 |         |        | 2  |
| 20 |         |        |         |        |         |        | R | 175.12  | 88.06  | 158.09  | 79.55  |         |        | 1  |

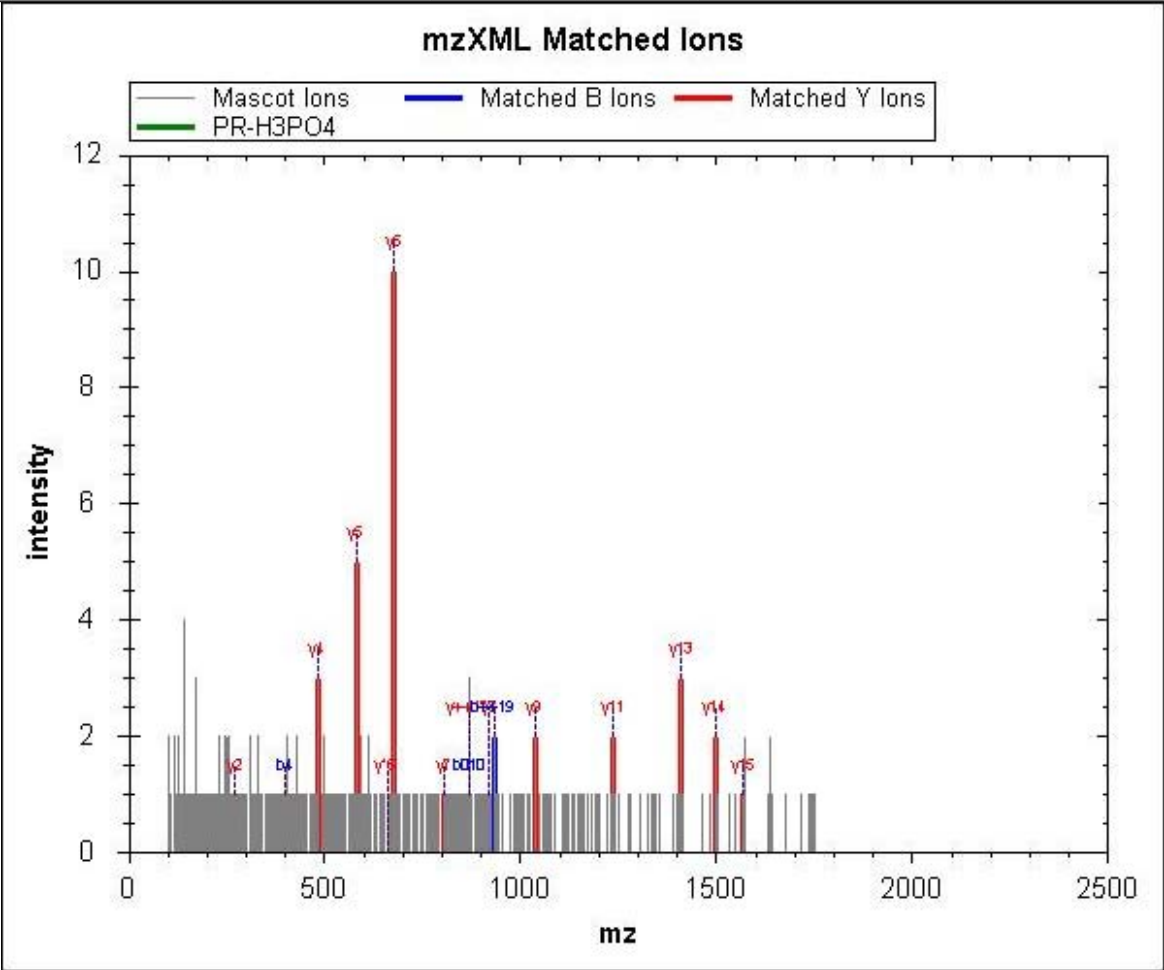

Protein index=1253, ACC No: IPI00010404

Peptide index=1272 MS/MS spectrum

Sequence: YTIHSQLEHLQSK, m/z:528.6086, charge:+ 3, Modification: , Mod Position:

Score: 44.66, Raw data:WET\_A5\_090615\_03.mzxml, MS/MS Elution time: 31.48533, Scan number:1602, Mass delta:-0.0063, Rank:1

| No | b       | b++    | b*      | b*++   | b0      | b0++   | Seq | y       | y++    | y*      | y*++   | y0      | y0++   | RevNo |
|----|---------|--------|---------|--------|---------|--------|-----|---------|--------|---------|--------|---------|--------|-------|
| 1  | 164.07  | 82.54  |         |        |         |        | Y   |         |        |         |        |         |        | 13    |
| 2  | 265.12  | 133.06 |         |        | 247.11  | 124.06 | T   | 1420.75 | 710.88 | 1403.73 | 702.37 | 1402.74 | 701.88 | 12    |
| 3  | 378.2   | 189.6  |         |        | 360.19  | 180.6  | I   | 1319.71 | 660.36 | 1302.68 | 651.84 | 1301.7  | 651.35 | 11    |
| 4  | 515.26  | 258.13 |         |        | 497.25  | 249.13 | H   | 1206.62 | 603.81 | 1189.6  | 595.3  | 1188.61 | 594.81 | 10    |
| 5  | 602.29  | 301.65 |         |        | 584.28  | 292.64 | S   | 1069.56 | 535.29 | 1052.54 | 526.77 | 1051.55 | 526.28 | 9     |
| 6  | 730.35  | 365.68 | 713.33  | 357.17 | 712.34  | 356.67 | Q   | 982.53  | 491.77 | 965.51  | 483.26 | 964.52  | 482.76 | 8     |
| 7  | 843.44  | 422.22 | 826.41  | 413.71 | 825.43  | 413.22 | L   | 854.47  | 427.74 | 837.45  | 419.23 | 836.46  | 418.73 | 7     |
| 8  | 972.48  | 486.74 | 955.45  | 478.23 | 954.47  | 477.74 | E   | 741.39  | 371.2  | 724.36  | 362.68 | 723.38  | 362.19 | 6     |
| 9  | 1109.54 | 555.27 | 1092.51 | 546.76 | 1091.53 | 546.27 | H   | 612.35  | 306.68 | 595.32  | 298.16 | 594.34  | 297.67 | 5     |
| 10 | 1222.62 | 611.81 | 1205.6  | 603.3  | 1204.61 | 602.81 | L   | 475.29  | 238.15 | 458.26  | 229.63 | 457.28  | 229.14 | 4     |
| 11 | 1350.68 | 675.84 | 1333.65 | 667.33 | 1332.67 | 666.84 | Q   | 362.2   | 181.61 | 345.18  | 173.09 | 344.19  | 172.6  | 3     |
| 12 | 1437.71 | 719.36 | 1420.69 | 710.85 | 1419.7  | 710.35 | S   | 234.14  | 117.58 | 217.12  | 109.06 | 216.13  | 108.57 | 2     |
| 13 |         |        |         |        |         |        | K   | 147.11  | 74.06  | 130.09  | 65.55  |         |        | 1     |

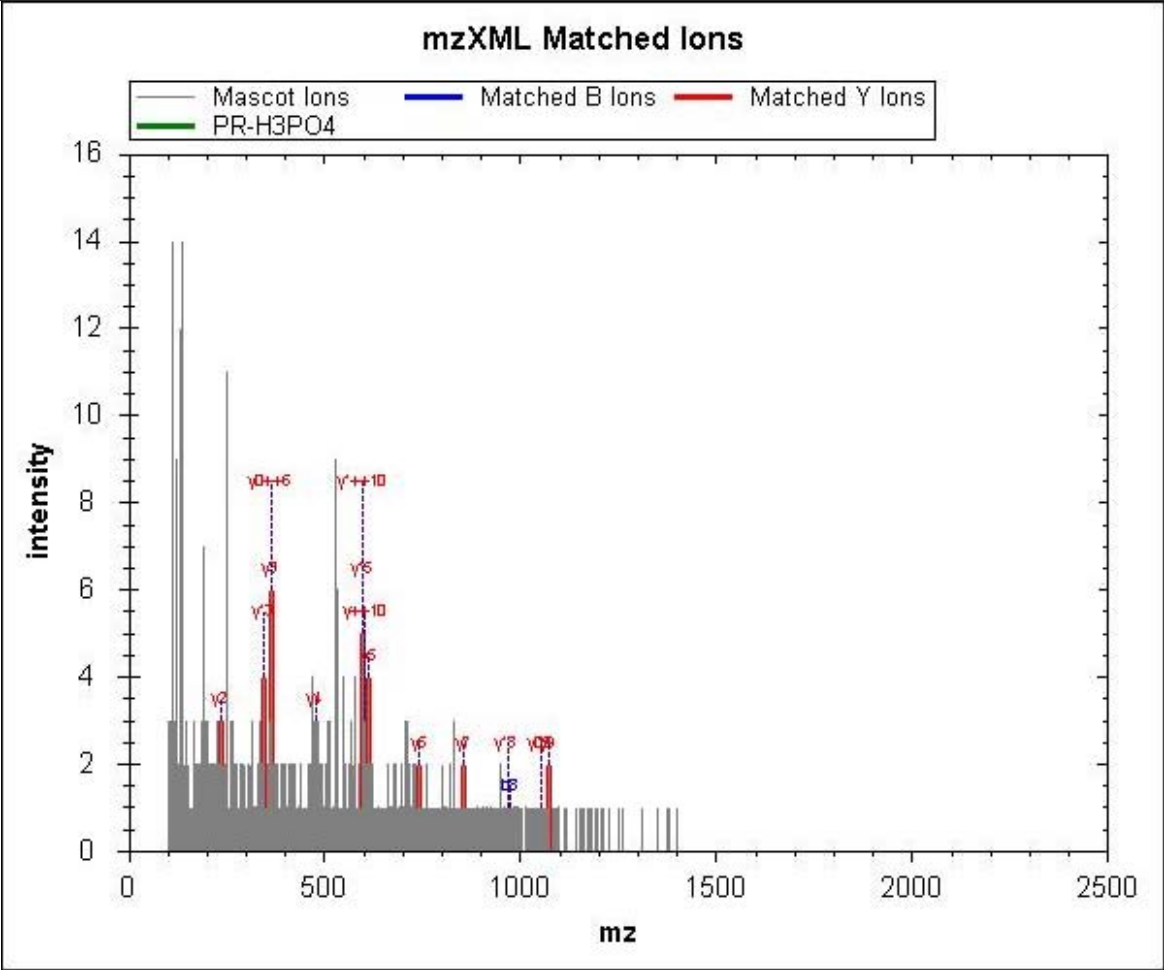

Peptide index=4993 MS/MS spectrum

Sequence: GNVGVVLFNFGK, m/z:625.8495, charge:+ 2, Modification: , Mod Position:

Score: 55.45, Raw data:WET\_A5\_090615\_03.mzxml, MS/MS Elution time: 67.83483, Scan number:3731, Mass delta:0.0026, Rank:1

| No | b       | b++    | b*      | b*++   | Seq | y       | y++    | y*      | y*++   | RevNo |
|----|---------|--------|---------|--------|-----|---------|--------|---------|--------|-------|
| 1  | 58.03   | 29.52  |         |        | G   |         |        |         |        | 12    |
| 2  | 172.07  | 86.54  | 155.05  | 78.03  | N   | 1193.67 | 597.34 | 1176.64 | 588.82 | 11    |
| 3  | 271.14  | 136.07 | 254.11  | 127.56 | V   | 1079.62 | 540.32 | 1062.6  | 531.8  | 10    |
| 4  | 328.16  | 164.58 | 311.13  | 156.07 | G   | 980.56  | 490.78 | 963.53  | 482.27 | 9     |
| 5  | 427.23  | 214.12 | 410.2   | 205.61 | V   | 923.53  | 462.27 | 906.51  | 453.76 | 8     |
| 6  | 526.3   | 263.65 | 509.27  | 255.14 | V   | 824.47  | 412.74 | 807.44  | 404.22 | 7     |
| 7  | 639.38  | 320.19 | 622.36  | 311.68 | L   | 725.4   | 363.2  | 708.37  | 354.69 | 6     |
| 8  | 786.45  | 393.73 | 769.42  | 385.22 | F   | 612.31  | 306.66 | 595.29  | 298.15 | 5     |
| 9  | 900.49  | 450.75 | 883.47  | 442.24 | N   | 465.25  | 233.13 | 448.22  | 224.61 | 4     |
| 10 | 1047.56 | 524.28 | 1030.54 | 515.77 | F   | 351.2   | 176.1  | 334.18  | 167.59 | 3     |
| 11 | 1104.58 | 552.8  | 1087.56 | 544.28 | G   | 204.13  | 102.57 | 187.11  | 94.06  | 2     |
| 12 |         |        |         |        | K   | 147.11  | 74.06  | 130.09  | 65.55  | 1     |

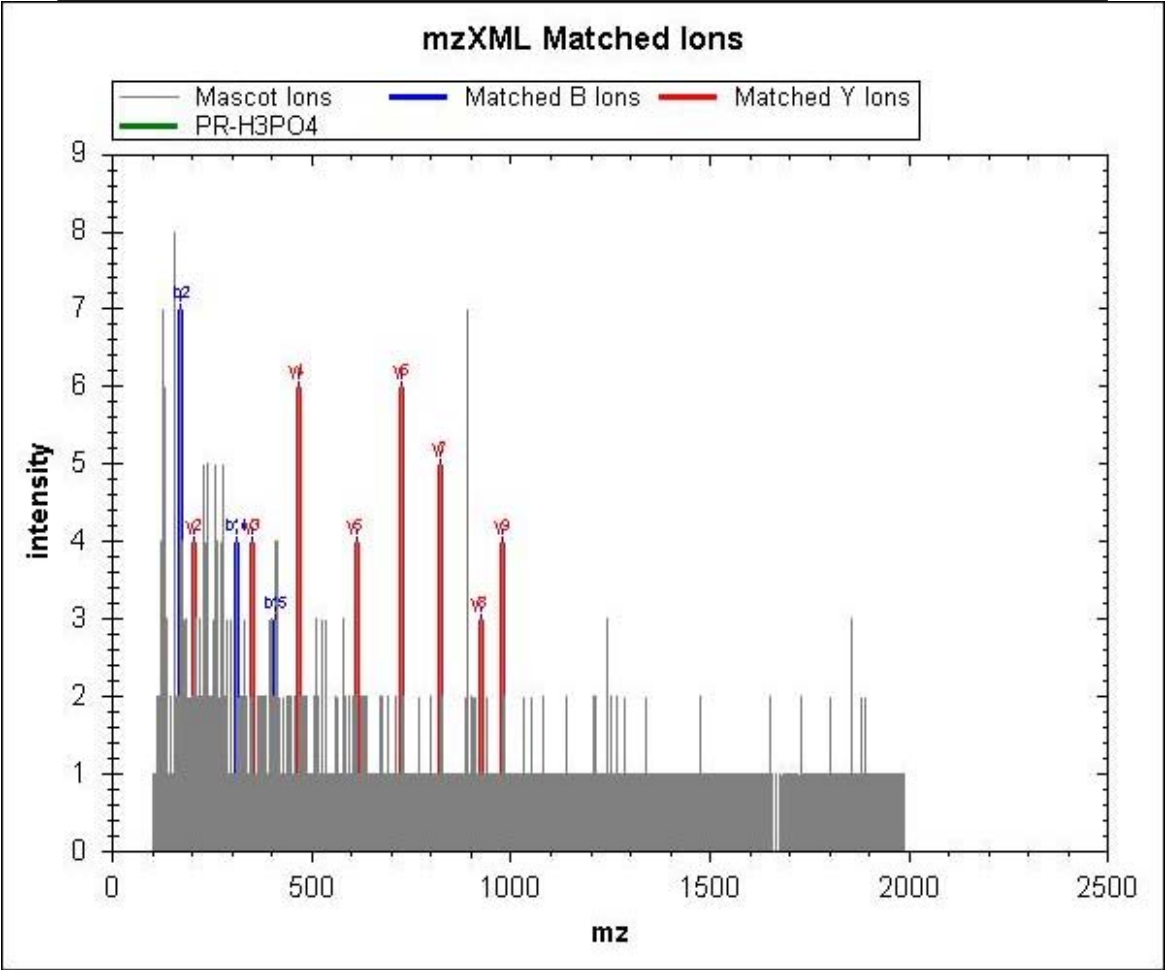

Protein index=1255, ACC No:IPI00023004

Peptide index=6125 MS/MS spectrum

Sequence: VWINTSDIILVGLR, m/z:799.9647, charge:+ 2, Modification: , Mod Position:

Score: 64.44, Raw data:WET\_A5\_090615\_03.mzxml, MS/MS Elution time: 82.93784, Scan number:4615, Mass delta:-0.0043, Rank:1

| No | b       | b++    | b*      | b*++   | b0      | b0++   | Seq | y       | y++    | y*      | y*++   | y0      | y0++   | RevNo |
|----|---------|--------|---------|--------|---------|--------|-----|---------|--------|---------|--------|---------|--------|-------|
| 1  | 100.08  | 50.54  |         |        |         |        | V   |         |        |         |        |         |        | 14    |
| 2  | 286.15  | 143.58 |         |        |         |        | W   | 1499.86 | 750.43 | 1482.83 | 741.92 | 1481.85 | 741.43 | 13    |
| 3  | 399.24  | 200.12 |         |        |         |        | I   | 1313.78 | 657.39 | 1296.75 | 648.88 | 1295.77 | 648.39 | 12    |
| 4  | 513.28  | 257.14 | 496.26  | 248.63 |         |        | N   | 1200.69 | 600.85 | 1183.67 | 592.34 | 1182.68 | 591.85 | 11    |
| 5  | 614.33  | 307.67 | 597.3   | 299.16 | 596.32  | 298.66 | T   | 1086.65 | 543.83 | 1069.63 | 535.32 | 1068.64 | 534.82 | 10    |
| 6  | 701.36  | 351.18 | 684.34  | 342.67 | 683.35  | 342.18 | S   | 985.6   | 493.31 | 968.58  | 484.79 | 967.59  | 484.3  | 9     |
| 7  | 816.39  | 408.7  | 799.36  | 400.18 | 798.38  | 399.69 | D   | 898.57  | 449.79 | 881.55  | 441.28 | 880.56  | 440.78 | 8     |
| 8  | 929.47  | 465.24 | 912.45  | 456.73 | 911.46  | 456.23 | I   | 783.55  | 392.28 | 766.52  | 383.76 |         |        | 7     |
| 9  | 1042.56 | 521.78 | 1025.53 | 513.27 | 1024.55 | 512.78 | I   | 670.46  | 335.73 | 653.43  | 327.22 |         |        | 6     |
| 10 | 1155.64 | 578.32 | 1138.61 | 569.81 | 1137.63 | 569.32 | L   | 557.38  | 279.19 | 540.35  | 270.68 |         |        | 5     |
| 11 | 1254.71 | 627.86 | 1237.68 | 619.35 | 1236.7  | 618.85 | V   | 444.29  | 222.65 | 427.27  | 214.14 |         |        | 4     |
| 12 | 1311.73 | 656.37 | 1294.7  | 647.86 | 1293.72 | 647.36 | G   | 345.22  | 173.12 | 328.2   | 164.6  |         |        | 3     |
| 13 | 1424.81 | 712.91 | 1407.79 | 704.4  | 1406.8  | 703.91 | L   | 288.2   | 144.61 | 271.18  | 136.09 |         |        | 2     |
| 14 |         |        |         |        |         |        | R   | 175.12  | 88.06  | 158.09  | 79.55  |         |        | 1     |

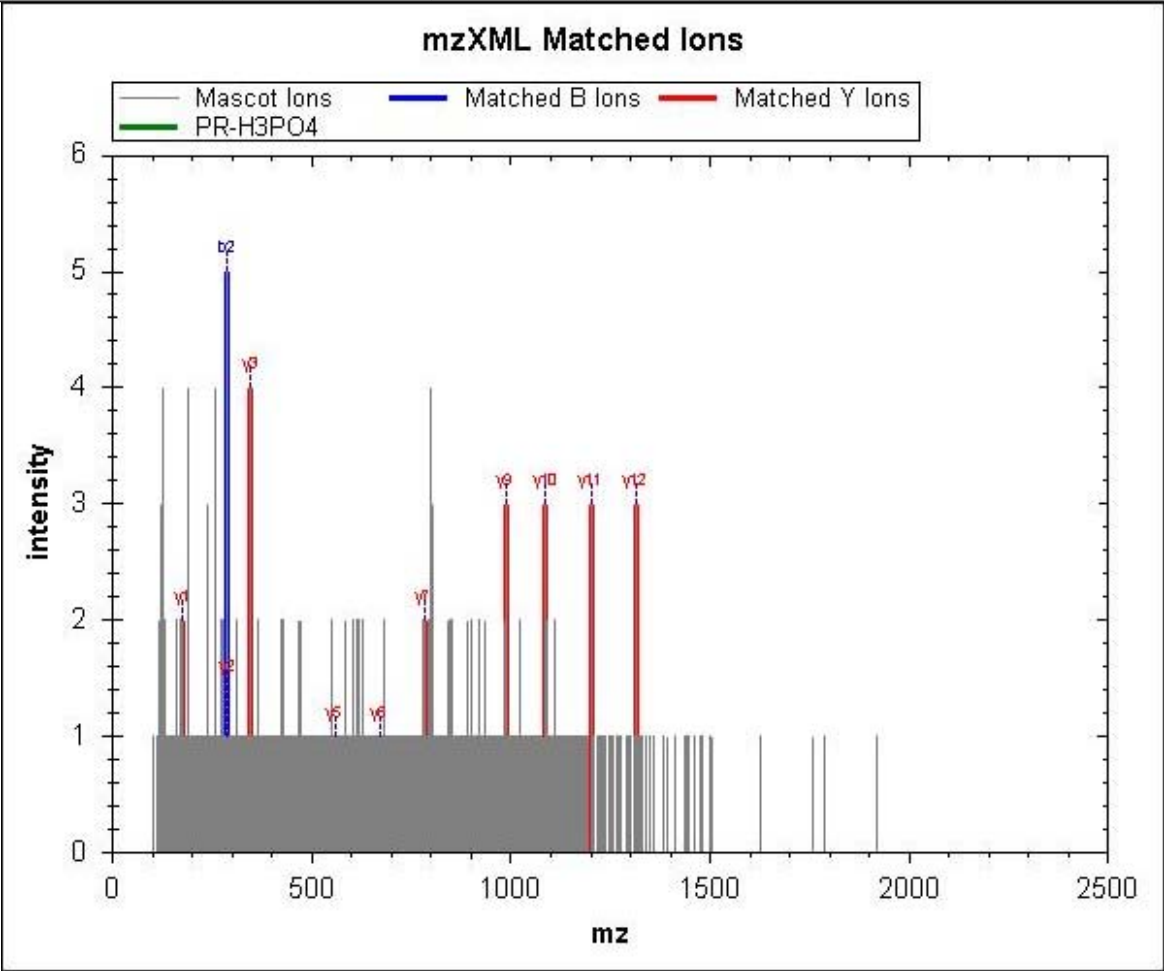

Protein index=1256, ACC No:IPI00019770

Peptide index=3857 MS/MS spectrum

Sequence: FVNVVPTFGK, m/z:554.3142, charge:+ 2, Modification: , Mod Position:

Score: 52.32, Raw data:WET\_A5\_090615\_03.mzxml, MS/MS Elution time: 56.6915, Scan number:3078, Mass delta:0.0014, Rank:1

| No | b      | b++    | b*     | b*++   | b0     | b0++   | Seq | y      | y++    | y*     | y*++   | y0     | y0++   | RevNo |
|----|--------|--------|--------|--------|--------|--------|-----|--------|--------|--------|--------|--------|--------|-------|
| 1  | 148.08 | 74.54  |        |        |        |        | F   |        |        |        |        |        |        | 10    |
| 2  | 247.14 | 124.08 |        |        |        |        | V   | 960.55 | 480.78 | 943.52 | 472.27 | 942.54 | 471.77 | 9     |
| 3  | 361.19 | 181.1  | 344.16 | 172.58 |        |        | N   | 861.48 | 431.25 | 844.46 | 422.73 | 843.47 | 422.24 | 8     |
| 4  | 460.26 | 230.63 | 443.23 | 222.12 |        |        | V   | 747.44 | 374.22 | 730.41 | 365.71 | 729.43 | 365.22 | 7     |
| 5  | 559.32 | 280.17 | 542.3  | 271.65 |        |        | V   | 648.37 | 324.69 | 631.34 | 316.18 | 630.36 | 315.68 | 6     |
| 6  | 656.38 | 328.69 | 639.35 | 320.18 |        |        | P   | 549.3  | 275.16 | 532.28 | 266.64 | 531.29 | 266.15 | 5     |
| 7  | 757.42 | 379.22 | 740.4  | 370.7  | 739.41 | 370.21 | T   | 452.25 | 226.63 | 435.22 | 218.12 | 434.24 | 217.62 | 4     |
| 8  | 904.49 | 452.75 | 887.47 | 444.24 | 886.48 | 443.74 | F   | 351.2  | 176.1  | 334.18 | 167.59 |        |        | 3     |
| 9  | 961.51 | 481.26 | 944.49 | 472.75 | 943.5  | 472.26 | G   | 204.13 | 102.57 | 187.11 | 94.06  |        |        | 2     |
| 10 |        |        |        |        |        |        | K   | 147.11 | 74.06  | 130.09 | 65.55  |        |        | 1     |

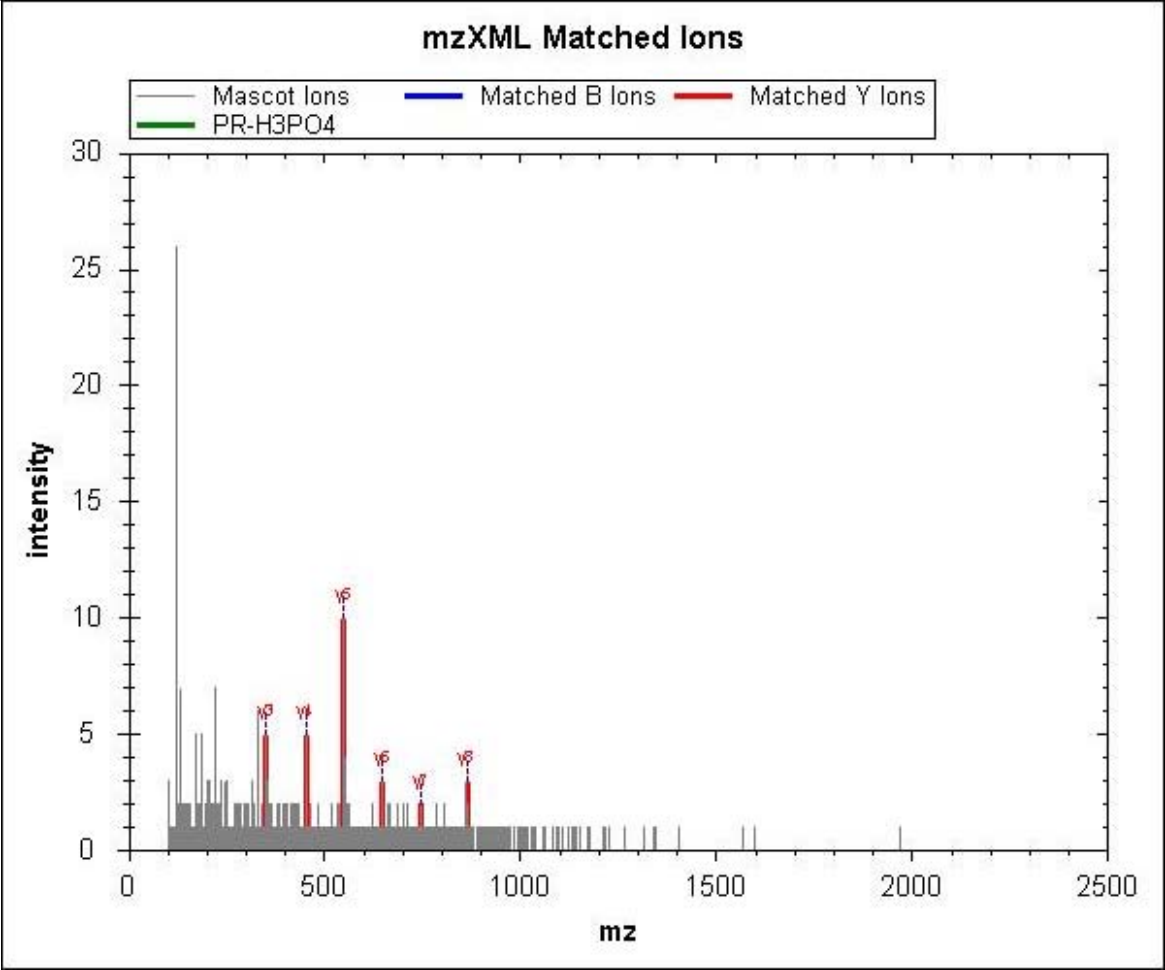

Protein index=1257, ACC No:IPI00013706

Peptide index=3977 MS/MS spectrum

Sequence: VLADLAIYEPK, m/z:616.3519, charge:+ 2, Modification: , Mod Position:

Score: 32.07, Raw data:WET\_A5\_090615\_03.mzxml, MS/MS Elution time: 57.937, Scan number:3151, Mass delta:0.0033, Rank:1

| No | b       | b++    | b0      | b0++   | Seq | y       | y++    | y*      | y*++   | y0      | y0++   | RevNo |
|----|---------|--------|---------|--------|-----|---------|--------|---------|--------|---------|--------|-------|
| 1  | 100.08  | 50.54  |         |        | V   |         |        |         |        |         |        | 11    |
| 2  | 213.16  | 107.08 |         |        | L   | 1132.62 | 566.82 | 1115.6  | 558.3  | 1114.61 | 557.81 | 10    |
| 3  | 284.2   | 142.6  |         |        | A   | 1019.54 | 510.27 | 1002.51 | 501.76 | 1001.53 | 501.27 | 9     |
| 4  | 399.22  | 200.12 | 381.21  | 191.11 | D   | 948.5   | 474.76 | 931.48  | 466.24 | 930.49  | 465.75 | 8     |
| 5  | 512.31  | 256.66 | 494.3   | 247.65 | L   | 833.48  | 417.24 | 816.45  | 408.73 | 815.47  | 408.24 | 7     |
| 6  | 583.34  | 292.18 | 565.33  | 283.17 | A   | 720.39  | 360.7  | 703.37  | 352.19 | 702.38  | 351.69 | 6     |
| 7  | 696.43  | 348.72 | 678.42  | 339.71 | I   | 649.36  | 325.18 | 632.33  | 316.67 | 631.34  | 316.18 | 5     |
| 8  | 859.49  | 430.25 | 841.48  | 421.24 | Y   | 536.27  | 268.64 | 519.24  | 260.13 | 518.26  | 259.63 | 4     |
| 9  | 988.53  | 494.77 | 970.52  | 485.77 | E   | 373.21  | 187.11 | 356.18  | 178.59 | 355.2   | 178.1  | 3     |
| 10 | 1085.59 | 543.3  | 1067.58 | 534.29 | P   | 244.17  | 122.59 | 227.14  | 114.07 |         |        | 2     |
| 11 |         |        |         |        | K   | 147.11  | 74.06  | 130.09  | 65.55  |         |        | 1     |

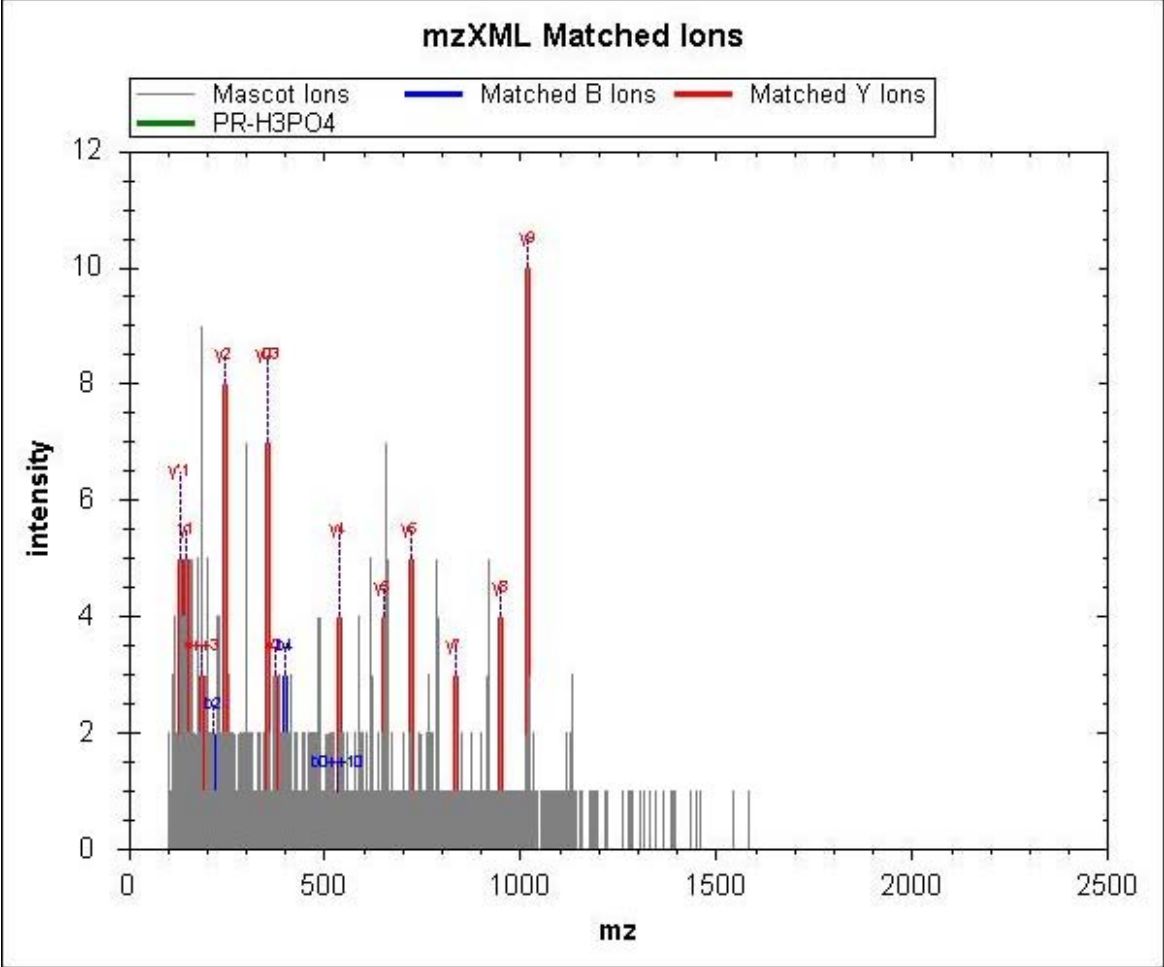

Protein index=1258, ACC No:IPI00418812

Peptide index=3976 MS/MS spectrum

Sequence: KLDDDHANHHQDQK, m/z:782.3512, charge:+ 2, Modification: , Mod Position:

Score: 38.27, Raw data:WET\_A5\_090615\_03.mzxml, MS/MS Elution time: 57.91667, Scan number:3150, Mass delta:-0.0195, Rank:1

| No | b       | b++    | b*      | b*++   | b0      | b0++   | Seq | y       | y++    | y*      | y*++   | y0      | y0++   | RevNo |
|----|---------|--------|---------|--------|---------|--------|-----|---------|--------|---------|--------|---------|--------|-------|
| 1  | 129.1   | 65.05  | 112.08  | 56.54  |         |        | K   |         |        |         |        |         |        | 13    |
| 2  | 242.19  | 121.6  | 225.16  | 113.08 |         |        | L   | 1435.62 | 718.31 | 1418.59 | 709.8  | 1417.61 | 709.31 | 12    |
| 3  | 357.21  | 179.11 | 340.19  | 170.6  | 339.2   | 170.1  | D   | 1322.54 | 661.77 | 1305.51 | 653.26 | 1304.53 | 652.77 | 11    |
| 4  | 472.24  | 236.62 | 455.21  | 228.11 | 454.23  | 227.62 | D   | 1207.51 | 604.26 | 1190.48 | 595.74 | 1189.5  | 595.25 | 10    |
| 5  | 587.27  | 294.14 | 570.24  | 285.62 | 569.26  | 285.13 | D   | 1092.48 | 546.74 | 1075.46 | 538.23 | 1074.47 | 537.74 | 9     |
| 6  | 658.3   | 329.66 | 641.28  | 321.14 | 640.29  | 320.65 | A   | 977.45  | 489.23 | 960.43  | 480.72 | 959.44  | 480.23 | 8     |
| 7  | 772.35  | 386.68 | 755.32  | 378.16 | 754.34  | 377.67 | N   | 906.42  | 453.71 | 889.39  | 445.2  | 888.41  | 444.71 | 7     |
| 8  | 909.41  | 455.21 | 892.38  | 446.69 | 891.4   | 446.2  | H   | 792.37  | 396.69 | 775.35  | 388.18 | 774.36  | 387.69 | 6     |
| 9  | 1046.46 | 523.74 | 1029.44 | 515.22 | 1028.45 | 514.73 | H   | 655.32  | 328.16 | 638.29  | 319.65 | 637.31  | 319.16 | 5     |
| 10 | 1174.52 | 587.77 | 1157.5  | 579.25 | 1156.51 | 578.76 | Q   | 518.26  | 259.63 | 501.23  | 251.12 | 500.25  | 250.63 | 4     |
| 11 | 1289.55 | 645.28 | 1272.52 | 636.77 | 1271.54 | 636.27 | D   | 390.2   | 195.6  | 373.17  | 187.09 | 372.19  | 186.6  | 3     |
| 12 | 1417.61 | 709.31 | 1400.58 | 700.79 | 1399.6  | 700.3  | Q   | 275.17  | 138.09 | 258.14  | 129.58 |         |        | 2     |
| 13 |         |        |         |        |         |        | K   | 147.11  | 74.06  | 130.09  | 65.55  |         |        | 1     |

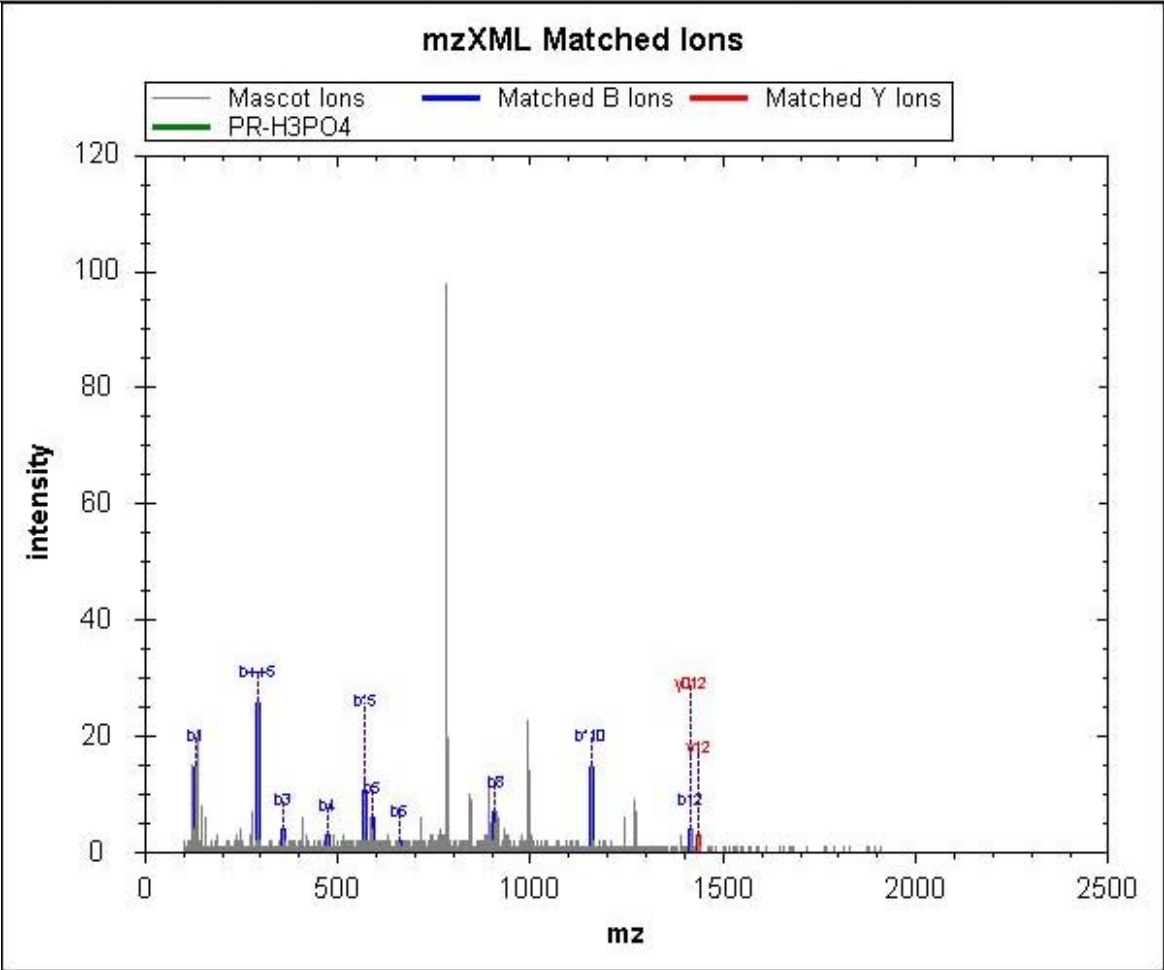

Protein index=1260, ACC No:IP100176824

Peptide index=7177 MS/MS spectrum

Sequence: EAPFVPVGIAGFAAIVAYGLYK, m/z:1127.13, charge:+ 2, Modification: , Mod Position:

Score: 44.09, Raw data:WET\_B1\_090616\_03.mzxml, MS/MS Elution time: 110.3128, Scan number:6284, Mass delta:0.0043, Rank:1

| No | b       | b++     | b0      | b0++    | Seq | y       | y++     | y*      | y*++    | RevNo |
|----|---------|---------|---------|---------|-----|---------|---------|---------|---------|-------|
| 1  | 130.05  | 65.53   | 112.04  | 56.52   | E   |         |         |         |         | 22    |
| 2  | 201.09  | 101.05  | 183.08  | 92.04   | A   | 2124.19 | 1062.6  | 2107.16 | 1054.08 | 21    |
| 3  | 298.14  | 149.57  | 280.13  | 140.57  | P   | 2053.15 | 1027.08 | 2036.13 | 1018.57 | 20    |
| 4  | 445.21  | 223.11  | 427.2   | 214.1   | F   | 1956.1  | 978.55  | 1939.07 | 970.04  | 19    |
| 5  | 544.28  | 272.64  | 526.27  | 263.64  | V   | 1809.03 | 905.02  | 1792    | 896.51  | 18    |
| 6  | 641.33  | 321.17  | 623.32  | 312.16  | P   | 1709.96 | 855.48  | 1692.94 | 846.97  | 17    |
| 7  | 740.4   | 370.7   | 722.39  | 361.7   | V   | 1612.91 | 806.96  | 1595.88 | 798.45  | 16    |
| 8  | 797.42  | 399.21  | 779.41  | 390.21  | G   | 1513.84 | 757.42  | 1496.81 | 748.91  | 15    |
| 9  | 910.5   | 455.76  | 892.49  | 446.75  | I   | 1456.82 | 728.91  | 1439.79 | 720.4   | 14    |
| 10 | 981.54  | 491.27  | 963.53  | 482.27  | A   | 1343.74 | 672.37  | 1326.71 | 663.86  | 13    |
| 11 | 1038.56 | 519.78  | 1020.55 | 510.78  | G   | 1272.7  | 636.85  | 1255.67 | 628.34  | 12    |
| 12 | 1185.63 | 593.32  | 1167.62 | 584.31  | F   | 1215.68 | 608.34  | 1198.65 | 599.83  | 11    |
| 13 | 1256.67 | 628.84  | 1238.66 | 619.83  | A   | 1068.61 | 534.81  | 1051.58 | 526.29  | 10    |
| 14 | 1327.7  | 664.36  | 1309.69 | 655.35  | A   | 997.57  | 499.29  | 980.55  | 490.78  | 9     |
| 15 | 1440.79 | 720.9   | 1422.78 | 711.89  | I   | 926.53  | 463.77  | 909.51  | 455.26  | 8     |
| 16 | 1539.86 | 770.43  | 1521.85 | 761.43  | V   | 813.45  | 407.23  | 796.42  | 398.72  | 7     |
| 17 | 1610.89 | 805.95  | 1592.88 | 796.95  | A   | 714.38  | 357.69  | 697.36  | 349.18  | 6     |
| 18 | 1773.96 | 887.48  | 1755.95 | 878.48  | Y   | 643.34  | 322.18  | 626.32  | 313.66  | 5     |
| 19 | 1830.98 | 915.99  | 1812.97 | 906.99  | G   | 480.28  | 240.64  | 463.26  | 232.13  | 4     |
| 20 | 1944.06 | 972.54  | 1926.05 | 963.53  | L   | 423.26  | 212.13  | 406.23  | 203.62  | 3     |
| 21 | 2107.13 | 1054.07 | 2089.12 | 1045.06 | Y   | 310.18  | 155.59  | 293.15  | 147.08  | 2     |
| 22 |         |         |         |         | K   | 147.11  | 74.06   | 130.09  | 65.55   | 1     |

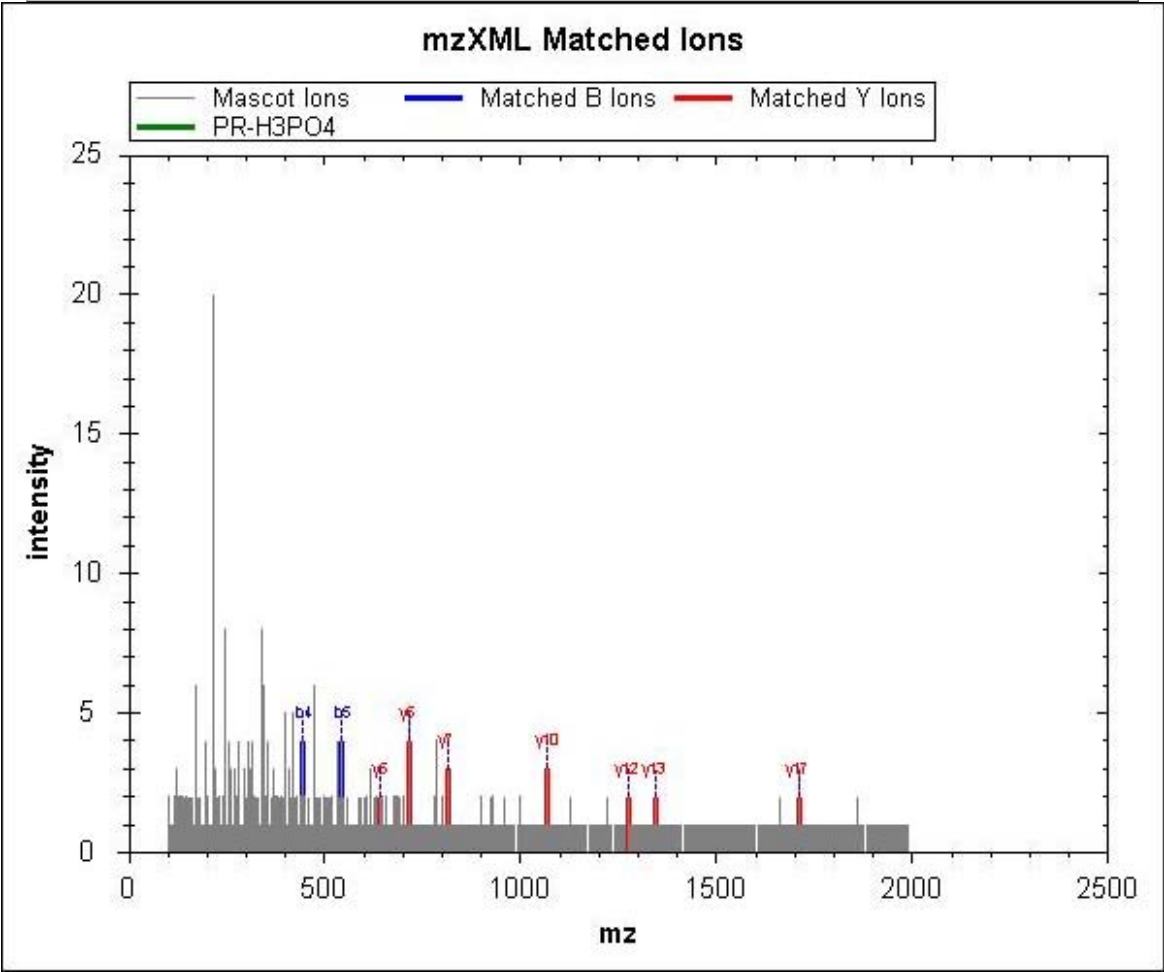

Protein index=1261, ACC No: IPI00000115

Peptide index=3443 MS/MS spectrum

Sequence: YIMVPSGNMGVFDPT EIHNR, m/z:770.3579, charge:+ 3, Modification: 2 Oxidation (M), Mod Position: 0.00100000100000000000.0

Score: 42.12, Raw data:WET\_B1\_090616\_01.mzxml, MS/MS Elution time: 52.63367, Scan number:2824, Mass delta:-0.0099, Rank:1

| No | b       | b++    | b*      | b*++   | b0      | b0++   | Seq | y       | y++     | y*      | y*++    | y0      | y0++   | RevNo |
|----|---------|--------|---------|--------|---------|--------|-----|---------|---------|---------|---------|---------|--------|-------|
| 1  | 164.07  | 82.54  |         |        |         |        | Y   |         |         |         |         |         |        | 20    |
| 2  | 277.15  | 139.08 |         |        |         |        | I   | 2018.01 | 1009.51 | 2000.98 | 1000.99 | 2000    | 1000.5 | 19    |
| 3  | 360.19  | 180.6  |         |        |         |        | M   | 1904.92 | 952.97  | 1887.9  | 944.45  | 1886.91 | 943.96 | 18    |
| 4  | 459.26  | 230.13 |         |        |         |        | V   | 1821.89 | 911.45  | 1804.86 | 902.93  | 1803.88 | 902.44 | 17    |
| 5  | 556.31  | 278.66 |         |        |         |        | P   | 1722.82 | 861.91  | 1705.79 | 853.4   | 1704.81 | 852.91 | 16    |
| 6  | 643.34  | 322.18 |         |        | 625.33  | 313.17 | S   | 1625.77 | 813.39  | 1608.74 | 804.87  | 1607.76 | 804.38 | 15    |
| 7  | 700.37  | 350.69 |         |        | 682.36  | 341.68 | G   | 1538.73 | 769.87  | 1521.71 | 761.36  | 1520.72 | 760.87 | 14    |
| 8  | 814.41  | 407.71 | 797.38  | 399.2  | 796.4   | 398.7  | N   | 1481.71 | 741.36  | 1464.69 | 732.85  | 1463.7  | 732.35 | 13    |
| 9  | 897.45  | 449.23 | 880.42  | 440.71 | 879.44  | 440.22 | M   | 1367.67 | 684.34  | 1350.64 | 675.83  | 1349.66 | 675.33 | 12    |
| 10 | 954.47  | 477.74 | 937.44  | 469.22 | 936.46  | 468.73 | G   | 1284.63 | 642.82  | 1267.61 | 634.31  | 1266.62 | 633.81 | 11    |
| 11 | 1053.54 | 527.27 | 1036.51 | 518.76 | 1035.53 | 518.27 | V   | 1227.61 | 614.31  | 1210.59 | 605.8   | 1209.6  | 605.3  | 10    |

|    |         |         |         |        |         |        |   |         |        |         |        |         |        |   |
|----|---------|---------|---------|--------|---------|--------|---|---------|--------|---------|--------|---------|--------|---|
| 12 | 1200.6  | 600.81  | 1183.58 | 592.29 | 1182.59 | 591.8  | F | 1128.54 | 564.78 | 1111.52 | 556.26 | 1110.53 | 555.77 | 9 |
| 13 | 1315.63 | 658.32  | 1298.61 | 649.81 | 1297.62 | 649.31 | D | 981.47  | 491.24 | 964.45  | 482.73 | 963.46  | 482.24 | 8 |
| 14 | 1412.68 | 706.85  | 1395.66 | 698.33 | 1394.67 | 697.84 | P | 866.45  | 433.73 | 849.42  | 425.21 | 848.44  | 424.72 | 7 |
| 15 | 1513.73 | 757.37  | 1496.71 | 748.86 | 1495.72 | 748.36 | T | 769.4   | 385.2  | 752.37  | 376.69 | 751.38  | 376.2  | 6 |
| 16 | 1642.77 | 821.89  | 1625.75 | 813.38 | 1624.76 | 812.89 | E | 668.35  | 334.68 | 651.32  | 326.16 | 650.34  | 325.67 | 5 |
| 17 | 1755.86 | 878.43  | 1738.83 | 869.92 | 1737.85 | 869.43 | I | 539.3   | 270.16 | 522.28  | 261.64 |         |        | 4 |
| 18 | 1892.92 | 946.96  | 1875.89 | 938.45 | 1874.91 | 937.96 | H | 426.22  | 213.61 | 409.19  | 205.1  |         |        | 3 |
| 19 | 2006.96 | 1003.98 | 1989.93 | 995.47 | 1988.95 | 994.98 | N | 289.16  | 145.08 | 272.14  | 136.57 |         |        | 2 |
| 20 |         |         |         |        |         |        | R | 175.12  | 88.06  | 158.09  | 79.55  |         |        | 1 |

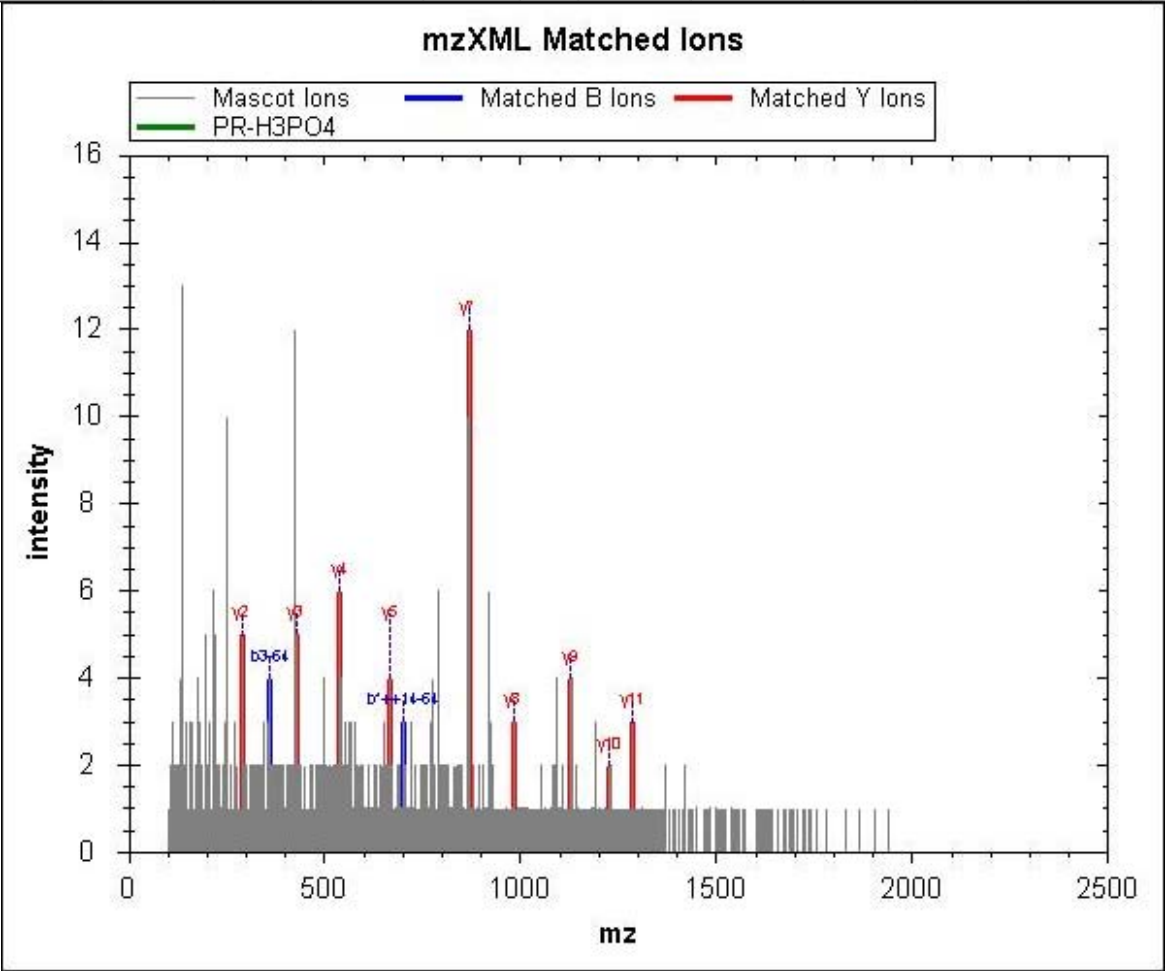

Protein index=1262, ACC No:IPI00216985

Peptide index=4447 MS/MS spectrum

Sequence: GVEFSLIGESTIR, m/z:704.3808, charge:+ 2, Modification: , Mod Position:

Score: 73.78, Raw data:WET\_B1\_090616\_01.mzxml, MS/MS Elution time: 62.4475, Scan number:3394, Mass delta:0.0066, Rank:1

| No | b      | b++    | b0     | b0++   | Seq | y       | y++    | y*      | y*++   | y0      | y0++   | RevNo |
|----|--------|--------|--------|--------|-----|---------|--------|---------|--------|---------|--------|-------|
| 1  | 58.03  | 29.52  |        |        | G   |         |        |         |        |         |        | 13    |
| 2  | 157.1  | 79.05  |        |        | V   | 1350.73 | 675.87 | 1333.7  | 667.35 | 1332.72 | 666.86 | 12    |
| 3  | 286.14 | 143.57 | 268.13 | 134.57 | E   | 1251.66 | 626.33 | 1234.63 | 617.82 | 1233.65 | 617.33 | 11    |

|    |         |        |         |        |   |         |        |         |        |        |        |    |
|----|---------|--------|---------|--------|---|---------|--------|---------|--------|--------|--------|----|
| 4  | 433.21  | 217.11 | 415.2   | 208.1  | F | 1122.62 | 561.81 | 1105.59 | 553.3  | 1104.6 | 552.81 | 10 |
| 5  | 520.24  | 260.62 | 502.23  | 251.62 | S | 975.55  | 488.28 | 958.52  | 479.76 | 957.54 | 479.27 | 9  |
| 6  | 633.32  | 317.17 | 615.31  | 308.16 | L | 888.51  | 444.76 | 871.49  | 436.25 | 870.5  | 435.76 | 8  |
| 7  | 746.41  | 373.71 | 728.4   | 364.7  | I | 775.43  | 388.22 | 758.4   | 379.71 | 757.42 | 379.21 | 7  |
| 8  | 803.43  | 402.22 | 785.42  | 393.21 | G | 662.35  | 331.68 | 645.32  | 323.16 | 644.34 | 322.67 | 6  |
| 9  | 932.47  | 466.74 | 914.46  | 457.73 | E | 605.33  | 303.17 | 588.3   | 294.65 | 587.31 | 294.16 | 5  |
| 10 | 1019.5  | 510.26 | 1001.49 | 501.25 | S | 476.28  | 238.65 | 459.26  | 230.13 | 458.27 | 229.64 | 4  |
| 11 | 1120.55 | 560.78 | 1102.54 | 551.77 | T | 389.25  | 195.13 | 372.22  | 186.62 | 371.24 | 186.12 | 3  |
| 12 | 1233.64 | 617.32 | 1215.63 | 608.32 | I | 288.2   | 144.61 | 271.18  | 136.09 |        |        | 2  |
| 13 |         |        |         |        | R | 175.12  | 88.06  | 158.09  | 79.55  |        |        | 1  |

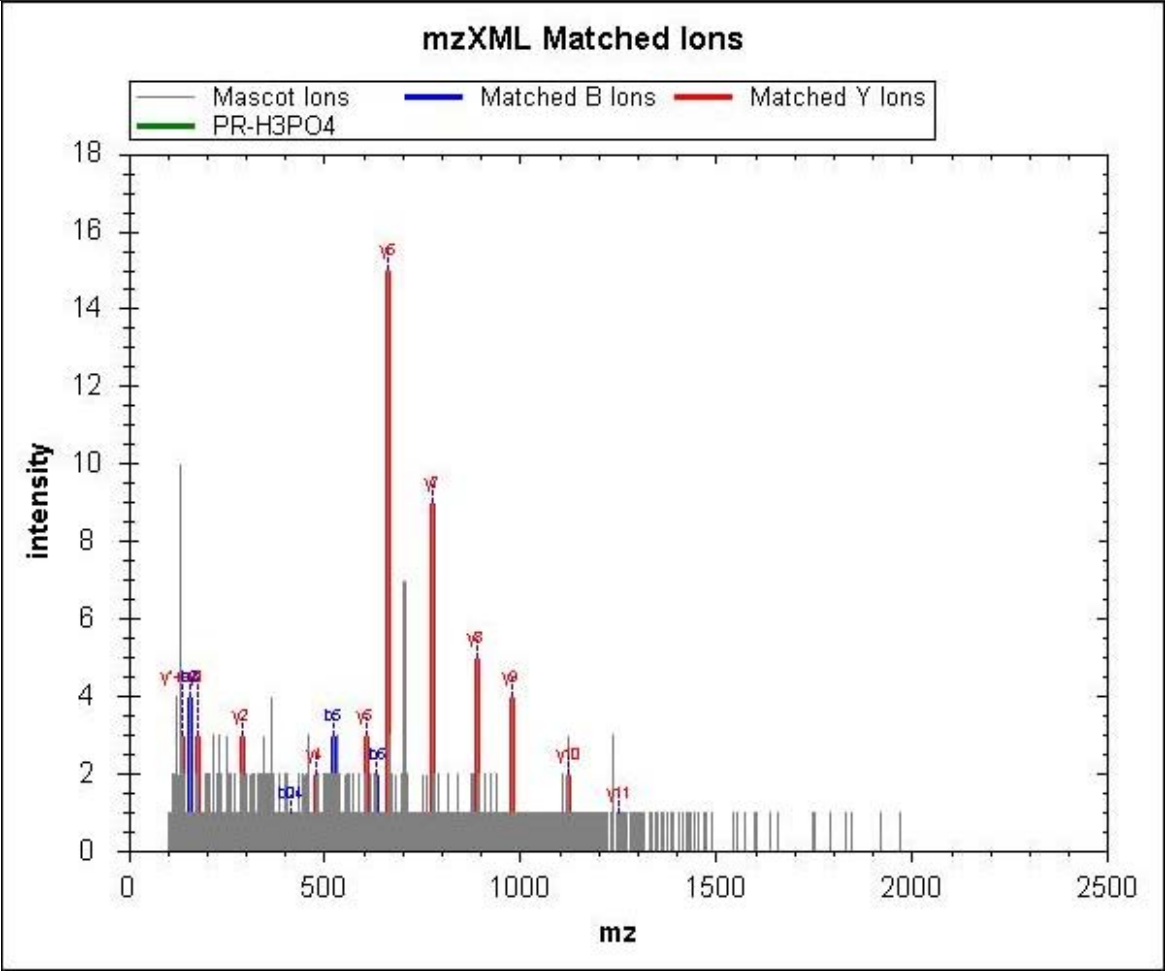

Protein index=1263, ACC No: IPI00375477

Peptide index=2101 MS/MS spectrum

Sequence: IVTTPQTVLR, m/z:564.3391, charge:+ 2, Modification: , Mod Position:

Score: 48.94, Raw data:WET\_B1\_090616\_01.mzxml, MS/MS Elution time: 40.85933, Scan number:2140, Mass delta:-0.0075, Rank:1

| No | b      | b++    | b* | b*++ | b0 | b0++ | Seq | y       | y++   | y*     | y*++   | y0     | y0++  | RevNo |
|----|--------|--------|----|------|----|------|-----|---------|-------|--------|--------|--------|-------|-------|
| 1  | 114.09 | 57.55  |    |      |    |      | I   |         |       |        |        |        |       | 10    |
| 2  | 213.16 | 107.08 |    |      |    |      | V   | 1014.59 | 507.8 | 997.57 | 499.29 | 996.58 | 498.8 | 9     |

|    |        |        |        |        |        |        |   |        |        |        |        |        |        |   |
|----|--------|--------|--------|--------|--------|--------|---|--------|--------|--------|--------|--------|--------|---|
| 3  | 314.21 | 157.61 |        |        | 296.2  | 148.6  | T | 915.53 | 458.27 | 898.5  | 449.75 | 897.52 | 449.26 | 8 |
| 4  | 415.26 | 208.13 |        |        | 397.24 | 199.13 | T | 814.48 | 407.74 | 797.45 | 399.23 | 796.47 | 398.74 | 7 |
| 5  | 512.31 | 256.66 |        |        | 494.3  | 247.65 | P | 713.43 | 357.22 | 696.4  | 348.71 | 695.42 | 348.21 | 6 |
| 6  | 640.37 | 320.69 | 623.34 | 312.17 | 622.36 | 311.68 | Q | 616.38 | 308.69 | 599.35 | 300.18 | 598.37 | 299.69 | 5 |
| 7  | 741.41 | 371.21 | 724.39 | 362.7  | 723.4  | 362.21 | T | 488.32 | 244.66 | 471.29 | 236.15 | 470.31 | 235.66 | 4 |
| 8  | 840.48 | 420.74 | 823.46 | 412.23 | 822.47 | 411.74 | V | 387.27 | 194.14 | 370.24 | 185.63 |        |        | 3 |
| 9  | 953.57 | 477.29 | 936.54 | 468.77 | 935.56 | 468.28 | L | 288.2  | 144.61 | 271.18 | 136.09 |        |        | 2 |
| 10 |        |        |        |        |        |        | R | 175.12 | 88.06  | 158.09 | 79.55  |        |        | 1 |

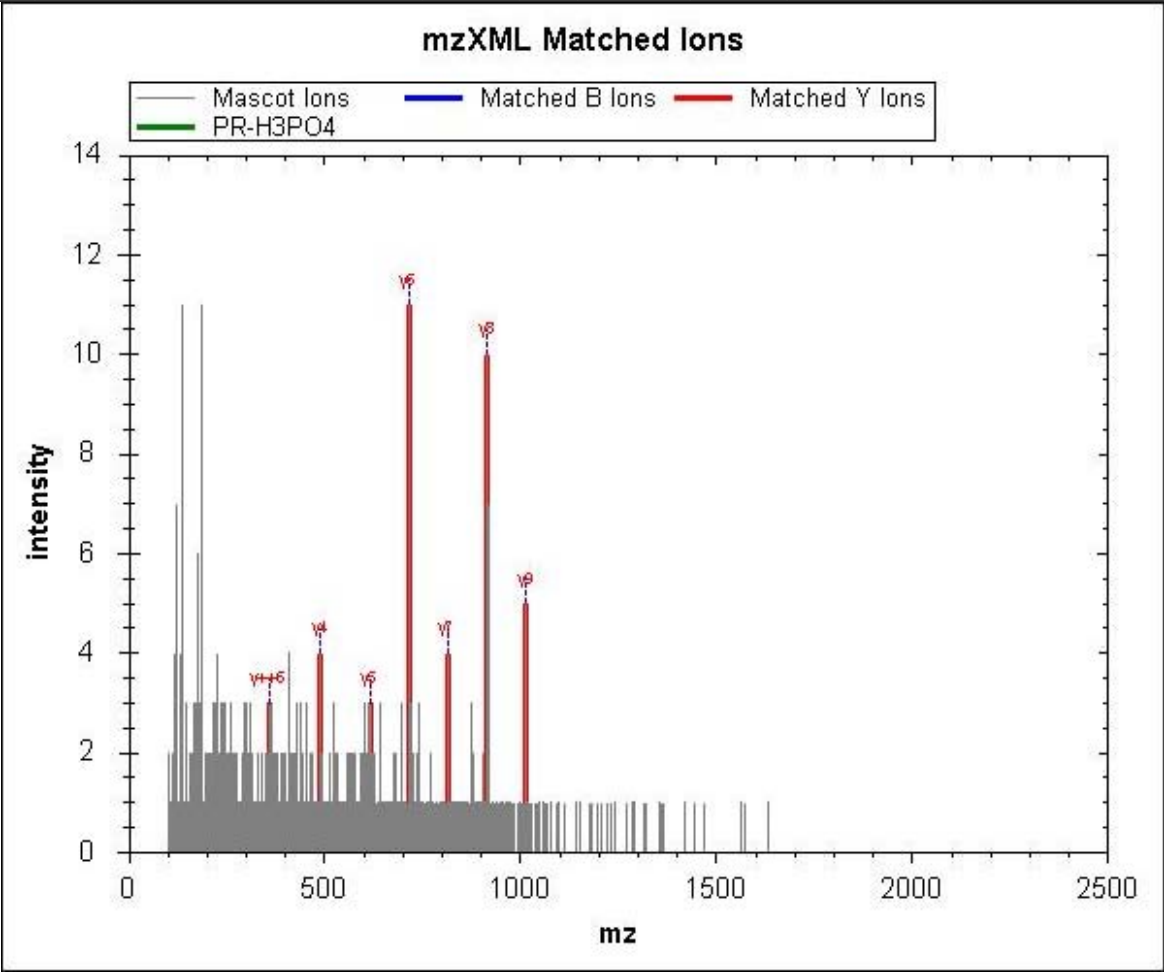

Protein index=1264, ACC No:IPI00166483

Peptide index=4724 MS/MS spectrum

Sequence: LGALSGAAALGFASYGAHGAQFPDAYGK, m/z:890.1092, charge:+ 3, Modification: , Mod Position:

Score: 98.96, Raw data:WET\_B1\_090616\_01.mzxml, MS/MS Elution time: 65.029, Scan number:3544, Mass delta:-0.0023, Rank:1

| No | b      | b++    | b* | b*++ | b0 | b0++ | Seq | y       | y++     | y*      | y*++    | y0      | y0++    | RevNo |
|----|--------|--------|----|------|----|------|-----|---------|---------|---------|---------|---------|---------|-------|
| 1  | 114.09 | 57.55  |    |      |    |      | L   |         |         |         |         |         |         | 28    |
| 2  | 171.11 | 86.06  |    |      |    |      | G   | 2555.23 | 1278.12 | 2538.2  | 1269.61 | 2537.22 | 1269.11 | 27    |
| 3  | 242.15 | 121.58 |    |      |    |      | A   | 2498.21 | 1249.61 | 2481.18 | 1241.1  | 2480.2  | 1240.6  | 26    |

|    |         |         |         |         |         |         |   |         |         |         |         |         |         |    |
|----|---------|---------|---------|---------|---------|---------|---|---------|---------|---------|---------|---------|---------|----|
| 4  | 355.23  | 178.12  |         |         |         |         | L | 2427.17 | 1214.09 | 2410.15 | 1205.58 | 2409.16 | 1205.08 | 25 |
| 5  | 442.27  | 221.64  |         |         | 424.26  | 212.63  | S | 2314.09 | 1157.55 | 2297.06 | 1149.03 | 2296.08 | 1148.54 | 24 |
| 6  | 499.29  | 250.15  |         |         | 481.28  | 241.14  | G | 2227.06 | 1114.03 | 2210.03 | 1105.52 | 2209.05 | 1105.03 | 23 |
| 7  | 570.32  | 285.67  |         |         | 552.31  | 276.66  | A | 2170.04 | 1085.52 | 2153.01 | 1077.01 | 2152.02 | 1076.52 | 22 |
| 8  | 641.36  | 321.18  |         |         | 623.35  | 312.18  | A | 2099    | 1050    | 2081.97 | 1041.49 | 2080.99 | 1041    | 21 |
| 9  | 712.4   | 356.7   |         |         | 694.39  | 347.7   | A | 2027.96 | 1014.48 | 2010.93 | 1005.97 | 2009.95 | 1005.48 | 20 |
| 10 | 825.48  | 413.25  |         |         | 807.47  | 404.24  | L | 1956.92 | 978.97  | 1939.9  | 970.45  | 1938.91 | 969.96  | 19 |
| 11 | 882.5   | 441.76  |         |         | 864.49  | 432.75  | G | 1843.84 | 922.42  | 1826.81 | 913.91  | 1825.83 | 913.42  | 18 |
| 12 | 1029.57 | 515.29  |         |         | 1011.56 | 506.28  | F | 1786.82 | 893.91  | 1769.79 | 885.4   | 1768.81 | 884.91  | 17 |
| 13 | 1100.61 | 550.81  |         |         | 1082.6  | 541.8   | A | 1639.75 | 820.38  | 1622.72 | 811.87  | 1621.74 | 811.37  | 16 |
| 14 | 1187.64 | 594.32  |         |         | 1169.63 | 585.32  | S | 1568.71 | 784.86  | 1551.69 | 776.35  | 1550.7  | 775.85  | 15 |
| 15 | 1350.71 | 675.86  |         |         | 1332.69 | 666.85  | Y | 1481.68 | 741.34  | 1464.65 | 732.83  | 1463.67 | 732.34  | 14 |
| 16 | 1407.73 | 704.37  |         |         | 1389.72 | 695.36  | G | 1318.62 | 659.81  | 1301.59 | 651.3   | 1300.61 | 650.81  | 13 |
| 17 | 1478.76 | 739.89  |         |         | 1460.75 | 730.88  | A | 1261.6  | 631.3   | 1244.57 | 622.79  | 1243.59 | 622.3   | 12 |
| 18 | 1615.82 | 808.42  |         |         | 1597.81 | 799.41  | H | 1190.56 | 595.78  | 1173.53 | 587.27  | 1172.55 | 586.78  | 11 |
| 19 | 1672.84 | 836.93  |         |         | 1654.83 | 827.92  | G | 1053.5  | 527.25  | 1036.47 | 518.74  | 1035.49 | 518.25  | 10 |
| 20 | 1743.88 | 872.44  |         |         | 1725.87 | 863.44  | A | 996.48  | 498.74  | 979.45  | 490.23  | 978.47  | 489.74  | 9  |
| 21 | 1871.94 | 936.47  | 1854.91 | 927.96  | 1853.93 | 927.47  | Q | 925.44  | 463.22  | 908.41  | 454.71  | 907.43  | 454.22  | 8  |
| 22 | 2019.01 | 1010.01 | 2001.98 | 1001.49 | 2001    | 1001    | F | 797.38  | 399.2   | 780.36  | 390.68  | 779.37  | 390.19  | 7  |
| 23 | 2116.06 | 1058.53 | 2099.03 | 1050.02 | 2098.05 | 1049.53 | P | 650.31  | 325.66  | 633.29  | 317.15  | 632.3   | 316.66  | 6  |
| 24 | 2231.09 | 1116.05 | 2214.06 | 1107.53 | 2213.08 | 1107.04 | D | 553.26  | 277.13  | 536.24  | 268.62  | 535.25  | 268.13  | 5  |
| 25 | 2302.12 | 1151.57 | 2285.1  | 1143.05 | 2284.11 | 1142.56 | A | 438.23  | 219.62  | 421.21  | 211.11  |         |         | 4  |
| 26 | 2465.19 | 1233.1  | 2448.16 | 1224.58 | 2447.18 | 1224.09 | Y | 367.2   | 184.1   | 350.17  | 175.59  |         |         | 3  |
| 27 | 2522.21 | 1261.61 | 2505.18 | 1253.1  | 2504.2  | 1252.6  | G | 204.13  | 102.57  | 187.11  | 94.06   |         |         | 2  |
| 28 |         |         |         |         |         |         | K | 147.11  | 74.06   | 130.09  | 65.55   |         |         | 1  |

| No | b      | b++    | b0     | b0++   | Seq | y      | y++    | y*     | y*++   | y0     | y0++   | RevNo |
|----|--------|--------|--------|--------|-----|--------|--------|--------|--------|--------|--------|-------|
| 1  | 100.08 | 50.54  |        |        | V   |        |        |        |        |        |        | 9     |
| 2  | 187.11 | 94.06  | 169.1  | 85.05  | S   | 946.57 | 473.79 | 929.55 | 465.28 | 928.56 | 464.78 | 8     |
| 3  | 334.18 | 167.59 | 316.17 | 158.59 | F   | 859.54 | 430.27 | 842.51 | 421.76 | 841.53 | 421.27 | 7     |
| 4  | 447.26 | 224.13 | 429.25 | 215.13 | L   | 712.47 | 356.74 | 695.45 | 348.23 | 694.46 | 347.73 | 6     |
| 5  | 560.34 | 280.68 | 542.33 | 271.67 | L   | 599.39 | 300.2  | 582.36 | 291.68 | 581.38 | 291.19 | 5     |
| 6  | 657.4  | 329.2  | 639.39 | 320.2  | P   | 486.3  | 243.66 | 469.28 | 235.14 | 468.29 | 234.65 | 4     |
| 7  | 758.44 | 379.73 | 740.43 | 370.72 | T   | 389.25 | 195.13 | 372.22 | 186.62 | 371.24 | 186.12 | 3     |
| 8  | 871.53 | 436.27 | 853.52 | 427.26 | L   | 288.2  | 144.61 | 271.18 | 136.09 |        |        | 2     |
| 9  |        |        |        |        | R   | 175.12 | 88.06  | 158.09 | 79.55  |        |        | 1     |

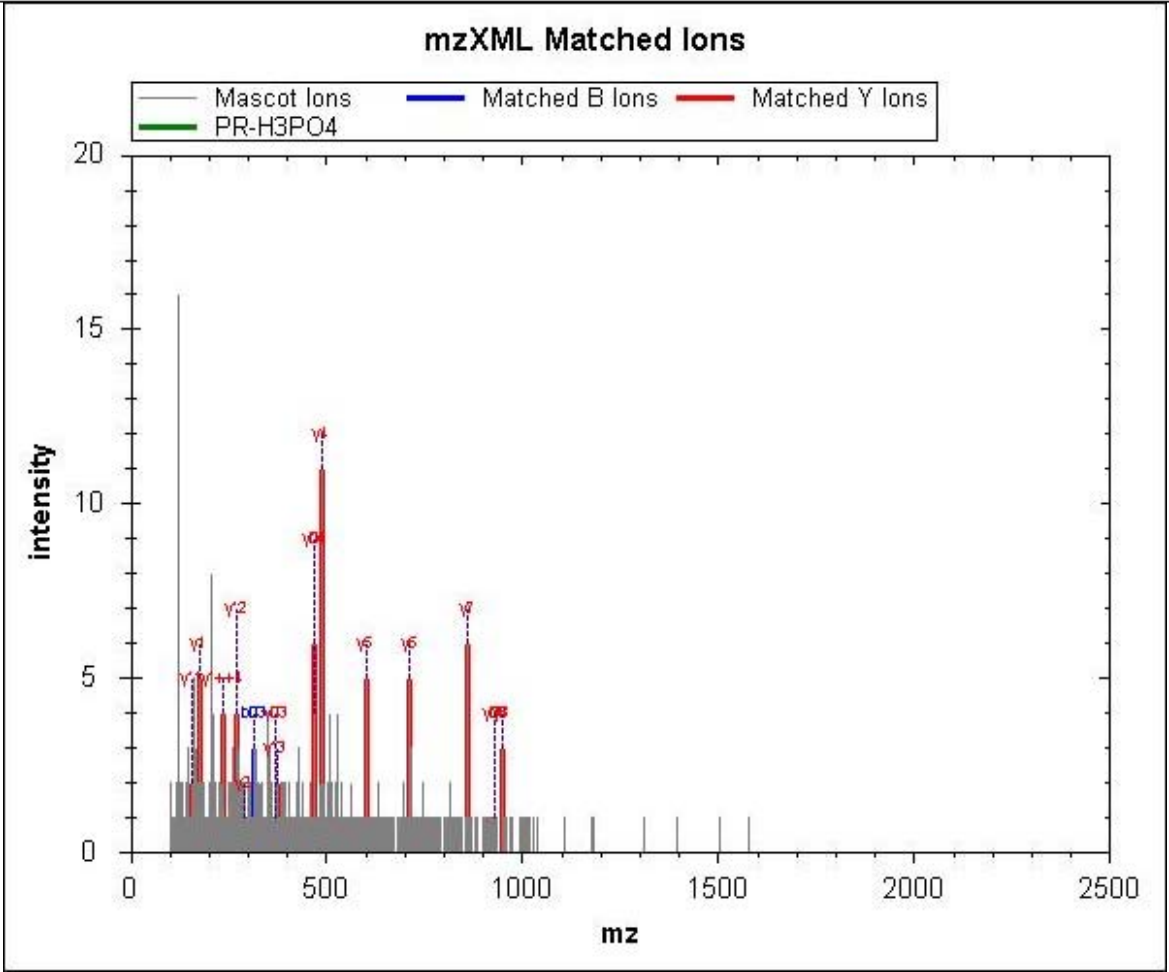

Protein index=1266, ACC No: IPI00296311

Peptide index=6027 MS/MS spectrum

Sequence: LLPMFIIIVPGMISR, m/z:859.4932, charge:+ 2, Modification: 2 Oxidation (M), Mod Position: 0.000100000001000.0

Score: 37.47, Raw data:WET\_B1\_090616\_01.mzxml, MS/MS Elution time: 81.33334, Scan number:4491, Mass delta:0.0049, Rank:1

| No | b       | b++    | b0 | b0++ | Seq | y       | y++    | y*      | y*++   | y0      | y0++   | RevNo |
|----|---------|--------|----|------|-----|---------|--------|---------|--------|---------|--------|-------|
| 1  | 114.09  | 57.55  |    |      | L   |         |        |         |        |         |        | 15    |
| 2  | 227.18  | 114.09 |    |      | L   | 1476.89 | 738.95 | 1459.87 | 730.44 | 1458.88 | 729.95 | 14    |
| 3  | 324.23  | 162.62 |    |      | P   | 1363.81 | 682.41 | 1346.78 | 673.9  | 1345.8  | 673.4  | 13    |
| 4  | 407.27  | 204.14 |    |      | M   | 1266.76 | 633.88 | 1249.73 | 625.37 | 1248.75 | 624.88 | 12    |
| 5  | 554.33  | 277.67 |    |      | F   | 1183.72 | 592.36 | 1166.69 | 583.85 | 1165.71 | 583.36 | 11    |
| 6  | 667.42  | 334.21 |    |      | I   | 1036.65 | 518.83 | 1019.62 | 510.32 | 1018.64 | 509.82 | 10    |
| 7  | 780.5   | 390.75 |    |      | I   | 923.57  | 462.29 | 906.54  | 453.77 | 905.56  | 453.28 | 9     |
| 8  | 879.57  | 440.29 |    |      | V   | 810.48  | 405.75 | 793.46  | 397.23 | 792.47  | 396.74 | 8     |
| 9  | 978.64  | 489.82 |    |      | V   | 711.41  | 356.21 | 694.39  | 347.7  | 693.4   | 347.21 | 7     |
| 10 | 1075.69 | 538.35 |    |      | P   | 612.35  | 306.68 | 595.32  | 298.16 | 594.34  | 297.67 | 6     |
| 11 | 1132.71 | 566.86 |    |      | G   | 515.29  | 258.15 | 498.27  | 249.64 | 497.28  | 249.15 | 5     |

|    |         |        |         |        |   |        |        |        |        |        |        |   |
|----|---------|--------|---------|--------|---|--------|--------|--------|--------|--------|--------|---|
| 12 | 1215.75 | 608.38 |         |        | M | 458.27 | 229.64 | 441.25 | 221.13 | 440.26 | 220.63 | 4 |
| 13 | 1328.83 | 664.92 |         |        | I | 375.24 | 188.12 | 358.21 | 179.61 | 357.22 | 179.12 | 3 |
| 14 | 1415.87 | 708.44 | 1397.86 | 699.43 | S | 262.15 | 131.58 | 245.12 | 123.07 | 244.14 | 122.57 | 2 |
| 15 |         |        |         |        | R | 175.12 | 88.06  | 158.09 | 79.55  |        |        | 1 |

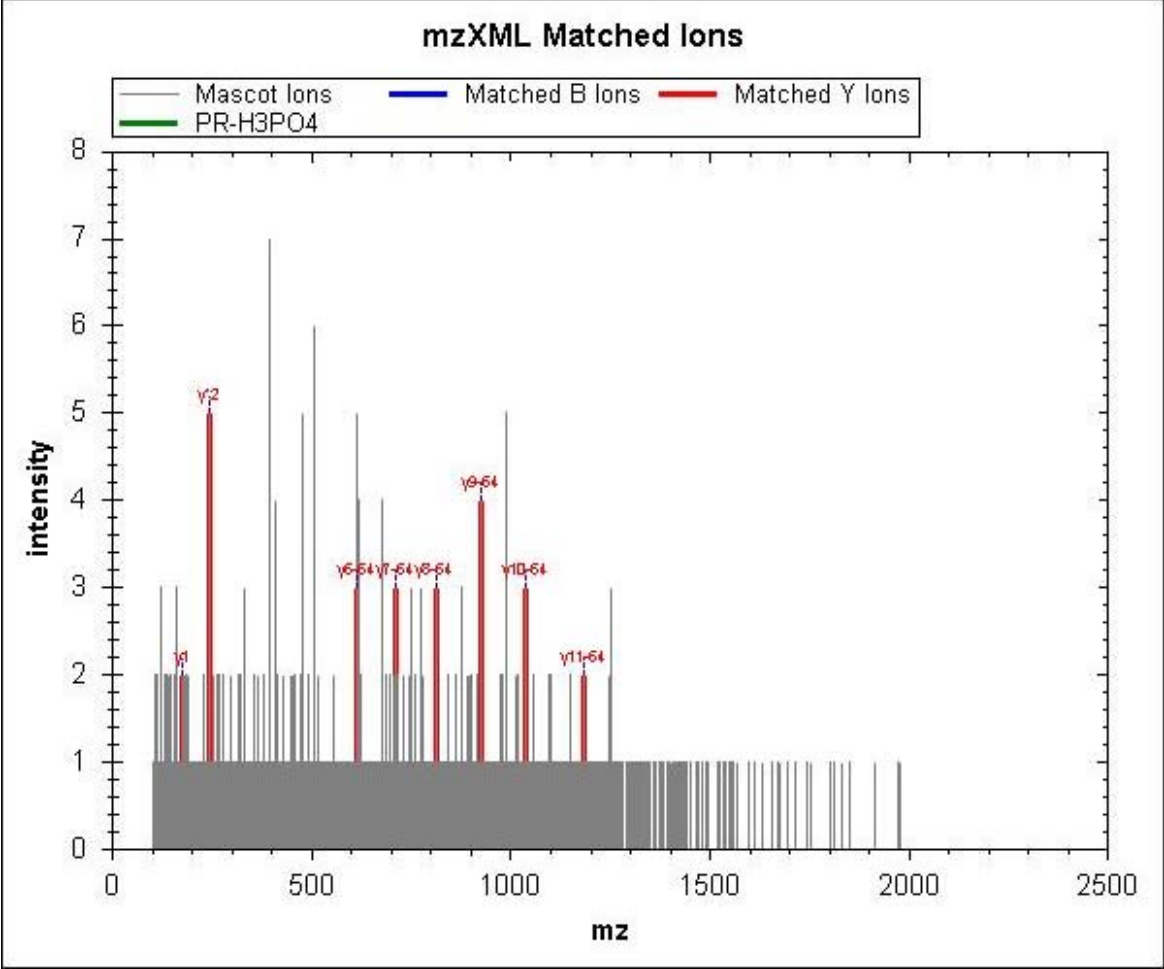

Protein index=1267, ACC No:IPI00234252

Peptide index=7180 MS/MS spectrum

Sequence: TLAGLVVQLLQFQEDAFGK, m/z:1039.075, charge:+ 2, Modification: , Mod Position:

Score: 88.73, Raw data:WET\_B1\_090616\_03.mzxml, MS/MS Elution time: 110.415, Scan number:6290, Mass delta:0.0101, Rank:1

| No | b      | b++    | b*     | b*++   | b0     | b0++   | Seq | y       | y++    | y*      | y*++   | y0      | y0++   | RevNo |
|----|--------|--------|--------|--------|--------|--------|-----|---------|--------|---------|--------|---------|--------|-------|
| 1  | 102.05 | 51.53  |        |        | 84.04  | 42.53  | T   |         |        |         |        |         |        | 19    |
| 2  | 215.14 | 108.07 |        |        | 197.13 | 99.07  | L   | 1976.09 | 988.55 | 1959.06 | 980.03 | 1958.07 | 979.54 | 18    |
| 3  | 286.18 | 143.59 |        |        | 268.17 | 134.59 | A   | 1863    | 932    | 1845.97 | 923.49 | 1844.99 | 923    | 17    |
| 4  | 343.2  | 172.1  |        |        | 325.19 | 163.1  | G   | 1791.96 | 896.49 | 1774.94 | 887.97 | 1773.95 | 887.48 | 16    |
| 5  | 456.28 | 228.64 |        |        | 438.27 | 219.64 | L   | 1734.94 | 867.97 | 1717.92 | 859.46 | 1716.93 | 858.97 | 15    |
| 6  | 555.35 | 278.18 |        |        | 537.34 | 269.17 | V   | 1621.86 | 811.43 | 1604.83 | 802.92 | 1603.85 | 802.43 | 14    |
| 7  | 654.42 | 327.71 |        |        | 636.41 | 318.71 | V   | 1522.79 | 761.9  | 1505.76 | 753.39 | 1504.78 | 752.89 | 13    |
| 8  | 782.48 | 391.74 | 765.45 | 383.23 | 764.47 | 382.74 | Q   | 1423.72 | 712.36 | 1406.7  | 703.85 | 1405.71 | 703.36 | 12    |

|    |         |        |         |        |         |        |   |         |        |         |        |         |        |    |
|----|---------|--------|---------|--------|---------|--------|---|---------|--------|---------|--------|---------|--------|----|
| 9  | 895.56  | 448.28 | 878.53  | 439.77 | 877.55  | 439.28 | L | 1295.66 | 648.34 | 1278.64 | 639.82 | 1277.65 | 639.33 | 11 |
| 10 | 1008.65 | 504.83 | 991.62  | 496.31 | 990.63  | 495.82 | L | 1182.58 | 591.79 | 1165.55 | 583.28 | 1164.57 | 582.79 | 10 |
| 11 | 1136.7  | 568.86 | 1119.68 | 560.34 | 1118.69 | 559.85 | Q | 1069.49 | 535.25 | 1052.47 | 526.74 | 1051.48 | 526.25 | 9  |
| 12 | 1283.77 | 642.39 | 1266.75 | 633.88 | 1265.76 | 633.38 | F | 941.44  | 471.22 | 924.41  | 462.71 | 923.43  | 462.22 | 8  |
| 13 | 1411.83 | 706.42 | 1394.8  | 697.91 | 1393.82 | 697.41 | Q | 794.37  | 397.69 | 777.34  | 389.17 | 776.36  | 388.68 | 7  |
| 14 | 1540.87 | 770.94 | 1523.85 | 762.43 | 1522.86 | 761.94 | E | 666.31  | 333.66 | 649.28  | 325.15 | 648.3   | 324.65 | 6  |
| 15 | 1655.9  | 828.45 | 1638.87 | 819.94 | 1637.89 | 819.45 | D | 537.27  | 269.14 | 520.24  | 260.62 | 519.26  | 260.13 | 5  |
| 16 | 1726.94 | 863.97 | 1709.91 | 855.46 | 1708.93 | 854.97 | A | 422.24  | 211.62 | 405.21  | 203.11 |         |        | 4  |
| 17 | 1874.01 | 937.51 | 1856.98 | 928.99 | 1856    | 928.5  | F | 351.2   | 176.1  | 334.18  | 167.59 |         |        | 3  |
| 18 | 1931.03 | 966.02 | 1914    | 957.5  | 1913.02 | 957.01 | G | 204.13  | 102.57 | 187.11  | 94.06  |         |        | 2  |
| 19 |         |        |         |        |         |        | K | 147.11  | 74.06  | 130.09  | 65.55  |         |        | 1  |

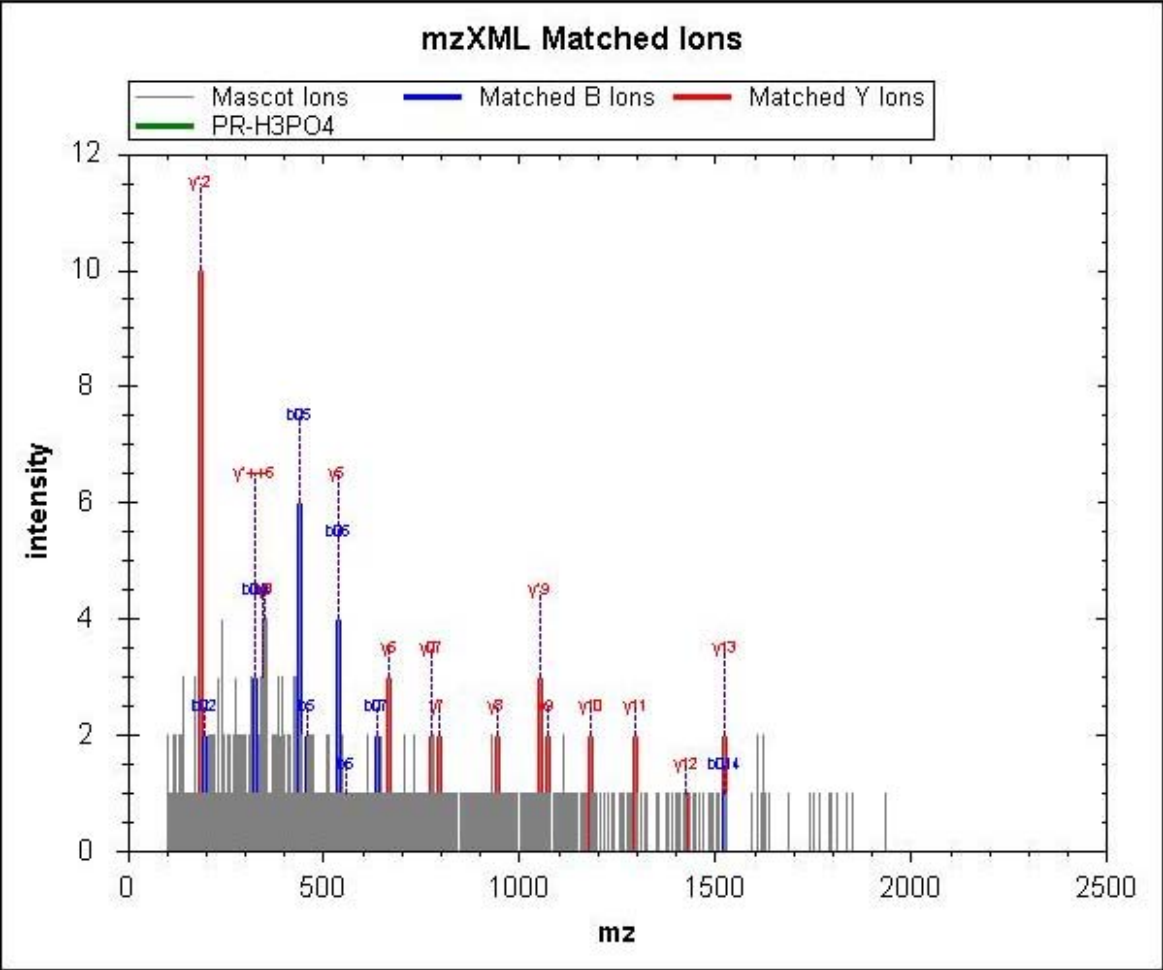

Protein index=1268, ACC No: IPI00015140

Peptide index=4406 MS/MS spectrum

Sequence: DVNYGWIIR, m/z:568.2999, charge:+ 2, Modification: , Mod Position:

Score: 32.53, Raw data:WET\_B1\_090616\_01.mzxml, MS/MS Elution time: 62.01883, Scan number:3369, Mass delta:0.0031, Rank:1

| No | b      | b++   | b* | b*++ | b0    | b0++  | Seq | y | y++ | y* | y*++ | RevNo |
|----|--------|-------|----|------|-------|-------|-----|---|-----|----|------|-------|
| 1  | 116.03 | 58.52 |    |      | 98.02 | 49.52 | D   |   |     |    |      | 9     |

|   |        |        |        |        |        |        |   |         |        |         |        |   |
|---|--------|--------|--------|--------|--------|--------|---|---------|--------|---------|--------|---|
| 2 | 215.1  | 108.05 |        |        | 197.09 | 99.05  | V | 1020.56 | 510.78 | 1003.54 | 502.27 | 8 |
| 3 | 329.15 | 165.08 | 312.12 | 156.56 | 311.13 | 156.07 | N | 921.49  | 461.25 | 904.47  | 452.74 | 7 |
| 4 | 492.21 | 246.61 | 475.18 | 238.09 | 474.2  | 237.6  | Y | 807.45  | 404.23 | 790.42  | 395.72 | 6 |
| 5 | 549.23 | 275.12 | 532.2  | 266.61 | 531.22 | 266.11 | G | 644.39  | 322.7  | 627.36  | 314.18 | 5 |
| 6 | 735.31 | 368.16 | 718.28 | 359.65 | 717.3  | 359.15 | W | 587.37  | 294.19 | 570.34  | 285.67 | 4 |
| 7 | 848.39 | 424.7  | 831.37 | 416.19 | 830.38 | 415.7  | I | 401.29  | 201.15 | 384.26  | 192.63 | 3 |
| 8 | 961.48 | 481.24 | 944.45 | 472.73 | 943.47 | 472.24 | I | 288.2   | 144.61 | 271.18  | 136.09 | 2 |
| 9 |        |        |        |        |        |        | R | 175.12  | 88.06  | 158.09  | 79.55  | 1 |

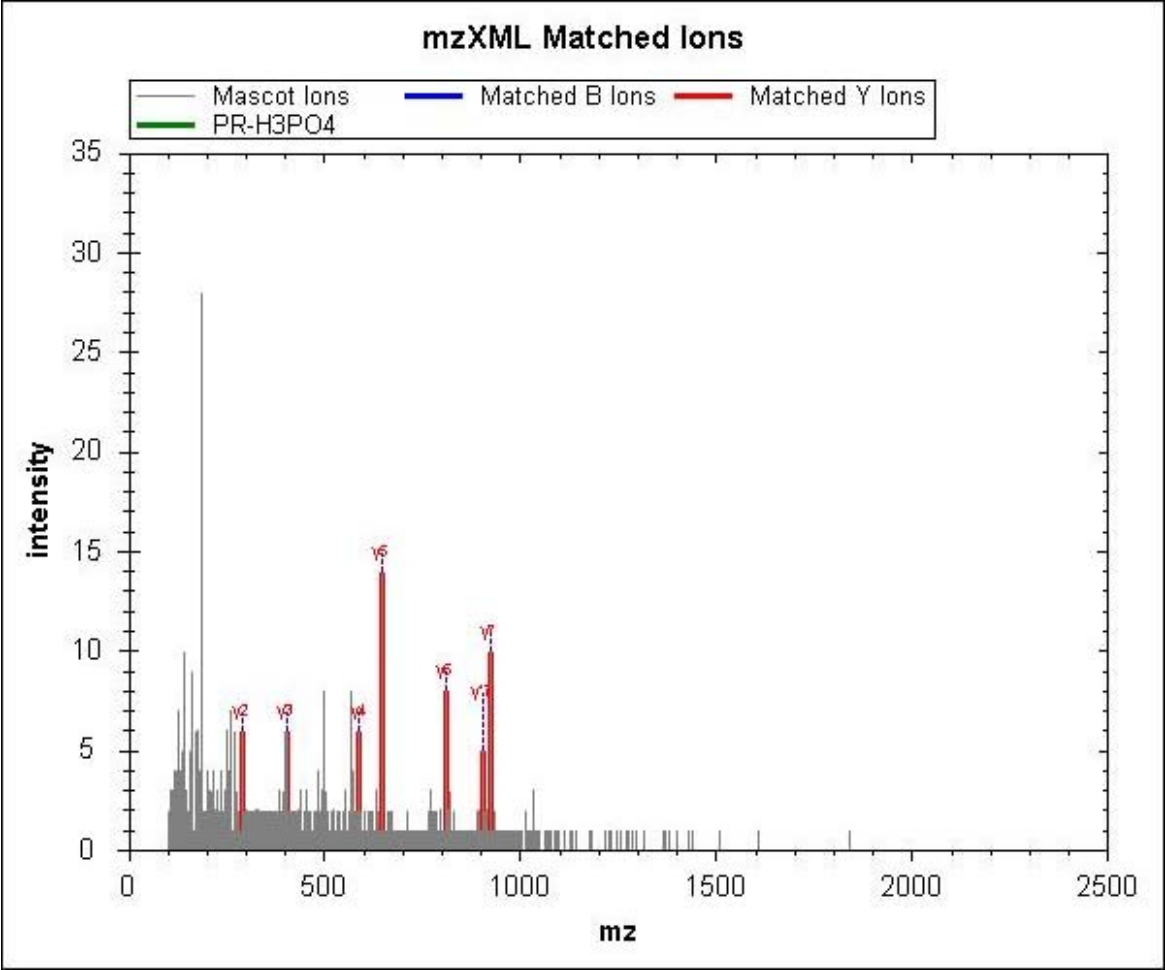

Protein index=1269, ACC No: IPI00023407

Peptide index=7097 MS/MS spectrum

Sequence: AYIGFIQSLAQFLGADASR, m/z:1014.537, charge:+ 2, Modification: , Mod Position:

Score: 40.4, Raw data:WET\_B1\_090616\_01.mzxml, MS/MS Elution time: 106.849, Scan number:6010, Mass delta:0.0122, Rank:1

| No | b      | b++    | b* | b*++ | b0 | b0++ | Seq | y       | y++    | y*      | y*++   | y0      | y0++   | RevNo |
|----|--------|--------|----|------|----|------|-----|---------|--------|---------|--------|---------|--------|-------|
| 1  | 72.04  | 36.53  |    |      |    |      | A   |         |        |         |        |         |        | 19    |
| 2  | 235.11 | 118.06 |    |      |    |      | Y   | 1957.02 | 979.01 | 1939.99 | 970.5  | 1939.01 | 970.01 | 18    |
| 3  | 348.19 | 174.6  |    |      |    |      | I   | 1793.95 | 897.48 | 1776.93 | 888.97 | 1775.94 | 888.48 | 17    |
| 4  | 405.21 | 203.11 |    |      |    |      | G   | 1680.87 | 840.94 | 1663.84 | 832.43 | 1662.86 | 831.93 | 16    |

|    |         |        |         |        |         |        |   |         |        |         |        |         |        |    |
|----|---------|--------|---------|--------|---------|--------|---|---------|--------|---------|--------|---------|--------|----|
| 5  | 552.28  | 276.64 |         |        |         |        | F | 1623.85 | 812.43 | 1606.82 | 803.91 | 1605.84 | 803.42 | 15 |
| 6  | 665.37  | 333.19 |         |        |         |        | I | 1476.78 | 738.89 | 1459.75 | 730.38 | 1458.77 | 729.89 | 14 |
| 7  | 793.42  | 397.22 | 776.4   | 388.7  |         |        | Q | 1363.7  | 682.35 | 1346.67 | 673.84 | 1345.69 | 673.35 | 13 |
| 8  | 880.46  | 440.73 | 863.43  | 432.22 | 862.45  | 431.73 | S | 1235.64 | 618.32 | 1218.61 | 609.81 | 1217.63 | 609.32 | 12 |
| 9  | 993.54  | 497.27 | 976.51  | 488.76 | 975.53  | 488.27 | L | 1148.61 | 574.81 | 1131.58 | 566.29 | 1130.6  | 565.8  | 11 |
| 10 | 1064.58 | 532.79 | 1047.55 | 524.28 | 1046.57 | 523.79 | A | 1035.52 | 518.26 | 1018.5  | 509.75 | 1017.51 | 509.26 | 10 |
| 11 | 1192.64 | 596.82 | 1175.61 | 588.31 | 1174.63 | 587.82 | Q | 964.48  | 482.75 | 947.46  | 474.23 | 946.47  | 473.74 | 9  |
| 12 | 1339.7  | 670.36 | 1322.68 | 661.84 | 1321.69 | 661.35 | F | 836.43  | 418.72 | 819.4   | 410.2  | 818.42  | 409.71 | 8  |
| 13 | 1452.79 | 726.9  | 1435.76 | 718.38 | 1434.78 | 717.89 | L | 689.36  | 345.18 | 672.33  | 336.67 | 671.35  | 336.18 | 7  |
| 14 | 1509.81 | 755.41 | 1492.78 | 746.9  | 1491.8  | 746.4  | G | 576.27  | 288.64 | 559.25  | 280.13 | 558.26  | 279.64 | 6  |
| 15 | 1580.85 | 790.93 | 1563.82 | 782.41 | 1562.84 | 781.92 | A | 519.25  | 260.13 | 502.23  | 251.62 | 501.24  | 251.12 | 5  |
| 16 | 1695.87 | 848.44 | 1678.85 | 839.93 | 1677.86 | 839.44 | D | 448.22  | 224.61 | 431.19  | 216.1  | 430.2   | 215.61 | 4  |
| 17 | 1766.91 | 883.96 | 1749.88 | 875.45 | 1748.9  | 874.95 | A | 333.19  | 167.1  | 316.16  | 158.58 | 315.18  | 158.09 | 3  |
| 18 | 1853.94 | 927.48 | 1836.92 | 918.96 | 1835.93 | 918.47 | S | 262.15  | 131.58 | 245.12  | 123.07 | 244.14  | 122.57 | 2  |
| 19 |         |        |         |        |         |        | R | 175.12  | 88.06  | 158.09  | 79.55  |         |        | 1  |

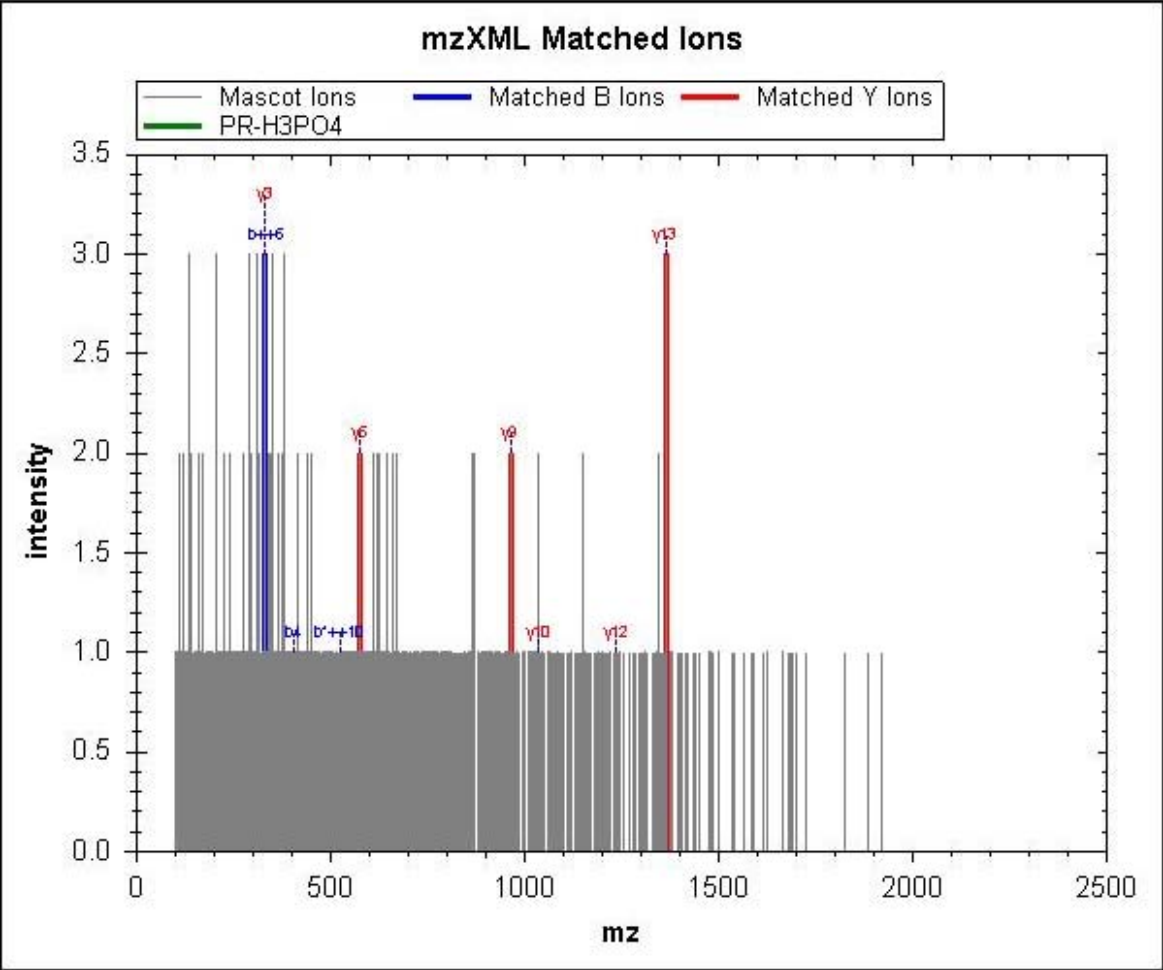

Protein index=1271, ACC No: IPI00296563

Peptide index=6631 MS/MS spectrum

Sequence: LGTNVESVLQAIER, m/z:821.4619, charge:+ 2, Modification: , Mod Position:

Score: 78.92, Raw data:WET\_B1\_090616\_03.mzxml, MS/MS Elution time: 92.59084, Scan number:5182,

Mass delta:0.01, Rank:1

| No | b       | b++    | b*      | b*++   | b0      | b0++   | Seq | y       | y++    | y*      | y*++   | y0      | y0++   | RevNo |
|----|---------|--------|---------|--------|---------|--------|-----|---------|--------|---------|--------|---------|--------|-------|
| 1  | 114.09  | 57.55  |         |        |         |        | L   |         |        |         |        |         |        | 15    |
| 2  | 171.11  | 86.06  |         |        |         |        | G   | 1528.83 | 764.92 | 1511.81 | 756.41 | 1510.82 | 755.91 | 14    |
| 3  | 272.16  | 136.58 |         |        | 254.15  | 127.58 | T   | 1471.81 | 736.41 | 1454.78 | 727.9  | 1453.8  | 727.4  | 13    |
| 4  | 386.2   | 193.61 | 369.18  | 185.09 | 368.19  | 184.6  | N   | 1370.76 | 685.89 | 1353.74 | 677.37 | 1352.75 | 676.88 | 12    |
| 5  | 485.27  | 243.14 | 468.25  | 234.63 | 467.26  | 234.13 | V   | 1256.72 | 628.86 | 1239.69 | 620.35 | 1238.71 | 619.86 | 11    |
| 6  | 614.31  | 307.66 | 597.29  | 299.15 | 596.3   | 298.66 | E   | 1157.65 | 579.33 | 1140.63 | 570.82 | 1139.64 | 570.32 | 10    |
| 7  | 701.35  | 351.18 | 684.32  | 342.66 | 683.34  | 342.17 | S   | 1028.61 | 514.81 | 1011.58 | 506.3  | 1010.6  | 505.8  | 9     |
| 8  | 800.41  | 400.71 | 783.39  | 392.2  | 782.4   | 391.71 | V   | 941.58  | 471.29 | 924.55  | 462.78 | 923.57  | 462.29 | 8     |
| 9  | 913.5   | 457.25 | 896.47  | 448.74 | 895.49  | 448.25 | L   | 842.51  | 421.76 | 825.48  | 413.25 | 824.5   | 412.75 | 7     |
| 10 | 1041.56 | 521.28 | 1024.53 | 512.77 | 1023.55 | 512.28 | Q   | 729.43  | 365.22 | 712.4   | 356.7  | 711.41  | 356.21 | 6     |
| 11 | 1112.59 | 556.8  | 1095.57 | 548.29 | 1094.58 | 547.8  | A   | 601.37  | 301.19 | 584.34  | 292.67 | 583.36  | 292.18 | 5     |
| 12 | 1225.68 | 613.34 | 1208.65 | 604.83 | 1207.67 | 604.34 | I   | 530.33  | 265.67 | 513.3   | 257.16 | 512.32  | 256.66 | 4     |
| 13 | 1338.76 | 669.89 | 1321.74 | 661.37 | 1320.75 | 660.88 | I   | 417.25  | 209.13 | 400.22  | 200.61 | 399.24  | 200.12 | 3     |
| 14 | 1467.81 | 734.41 | 1450.78 | 725.89 | 1449.79 | 725.4  | E   | 304.16  | 152.58 | 287.13  | 144.07 | 286.15  | 143.58 | 2     |
| 15 |         |        |         |        |         |        | R   | 175.12  | 88.06  | 158.09  | 79.55  |         |        | 1     |

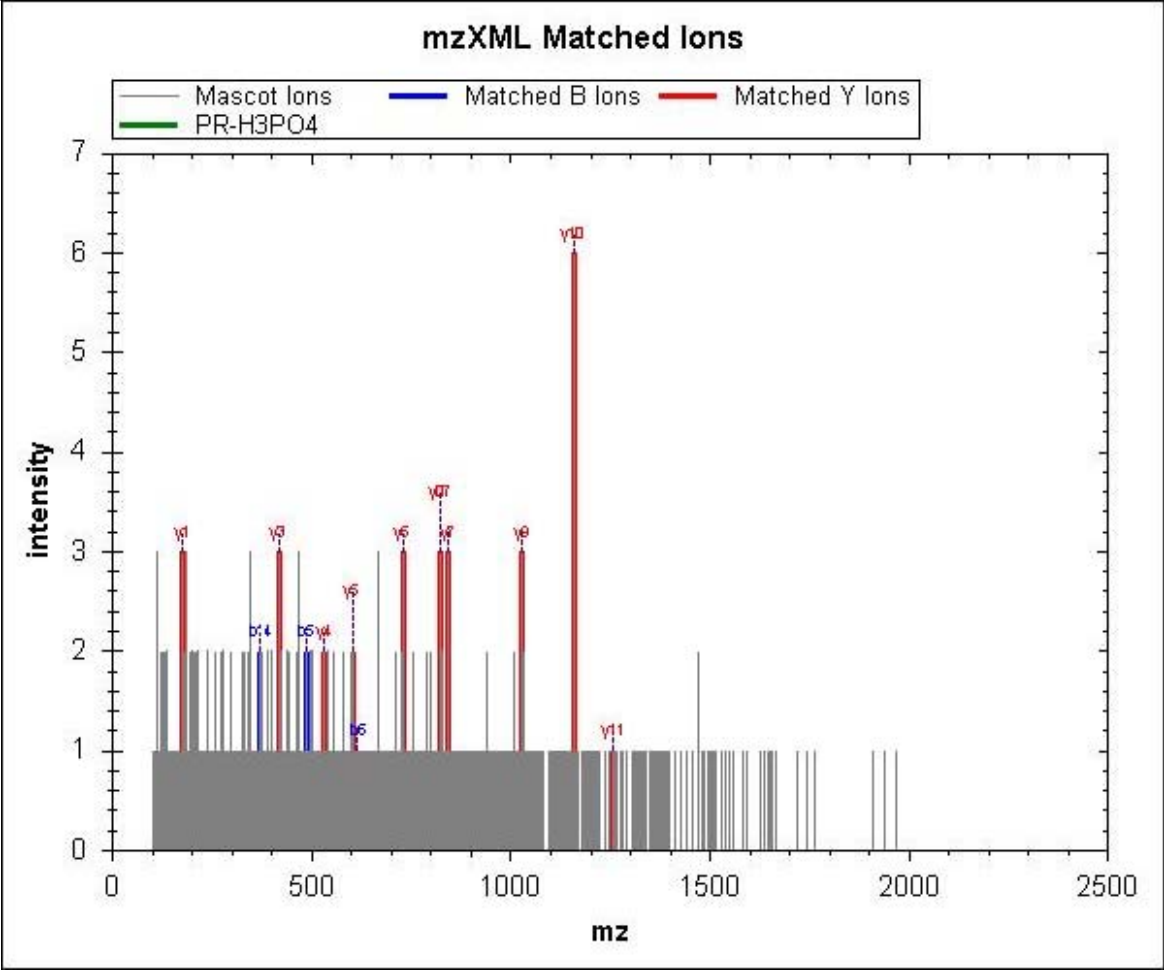

Protein index=1272, ACC No:IP100146447

Peptide index=3768 MS/MS spectrum

Sequence: AALNALQPPEFR, m/z:663.8559, charge:+ 2, Modification: , Mod Position:

Score: 55.55, Raw data:WET\_B1\_090616\_02.mzxml, MS/MS Elution time: 55.65083, Scan number:3018, Mass delta:-0.0088, Rank:1

| No | b       | b++    | b*      | b*++   | b0      | b0++   | Seq | y       | y++    | y*      | y*++   | y0      | y0++   | RevNo |
|----|---------|--------|---------|--------|---------|--------|-----|---------|--------|---------|--------|---------|--------|-------|
| 1  | 72.04   | 36.53  |         |        |         |        | A   |         |        |         |        |         |        | 12    |
| 2  | 143.08  | 72.04  |         |        |         |        | A   | 1255.68 | 628.34 | 1238.65 | 619.83 | 1237.67 | 619.34 | 11    |
| 3  | 256.17  | 128.59 |         |        |         |        | L   | 1184.64 | 592.82 | 1167.62 | 584.31 | 1166.63 | 583.82 | 10    |
| 4  | 370.21  | 185.61 | 353.18  | 177.09 |         |        | N   | 1071.56 | 536.28 | 1054.53 | 527.77 | 1053.55 | 527.28 | 9     |
| 5  | 441.25  | 221.13 | 424.22  | 212.61 |         |        | A   | 957.52  | 479.26 | 940.49  | 470.75 | 939.5   | 470.26 | 8     |
| 6  | 554.33  | 277.67 | 537.3   | 269.16 |         |        | L   | 886.48  | 443.74 | 869.45  | 435.23 | 868.47  | 434.74 | 7     |
| 7  | 682.39  | 341.7  | 665.36  | 333.18 |         |        | Q   | 773.39  | 387.2  | 756.37  | 378.69 | 755.38  | 378.2  | 6     |
| 8  | 779.44  | 390.22 | 762.41  | 381.71 |         |        | P   | 645.34  | 323.17 | 628.31  | 314.66 | 627.32  | 314.17 | 5     |
| 9  | 876.49  | 438.75 | 859.47  | 430.24 |         |        | P   | 548.28  | 274.64 | 531.26  | 266.13 | 530.27  | 265.64 | 4     |
| 10 | 1005.54 | 503.27 | 988.51  | 494.76 | 987.53  | 494.27 | E   | 451.23  | 226.12 | 434.2   | 217.61 | 433.22  | 217.11 | 3     |
| 11 | 1152.6  | 576.81 | 1135.58 | 568.29 | 1134.59 | 567.8  | F   | 322.19  | 161.6  | 305.16  | 153.08 |         |        | 2     |
| 12 |         |        |         |        |         |        | R   | 175.12  | 88.06  | 158.09  | 79.55  |         |        | 1     |

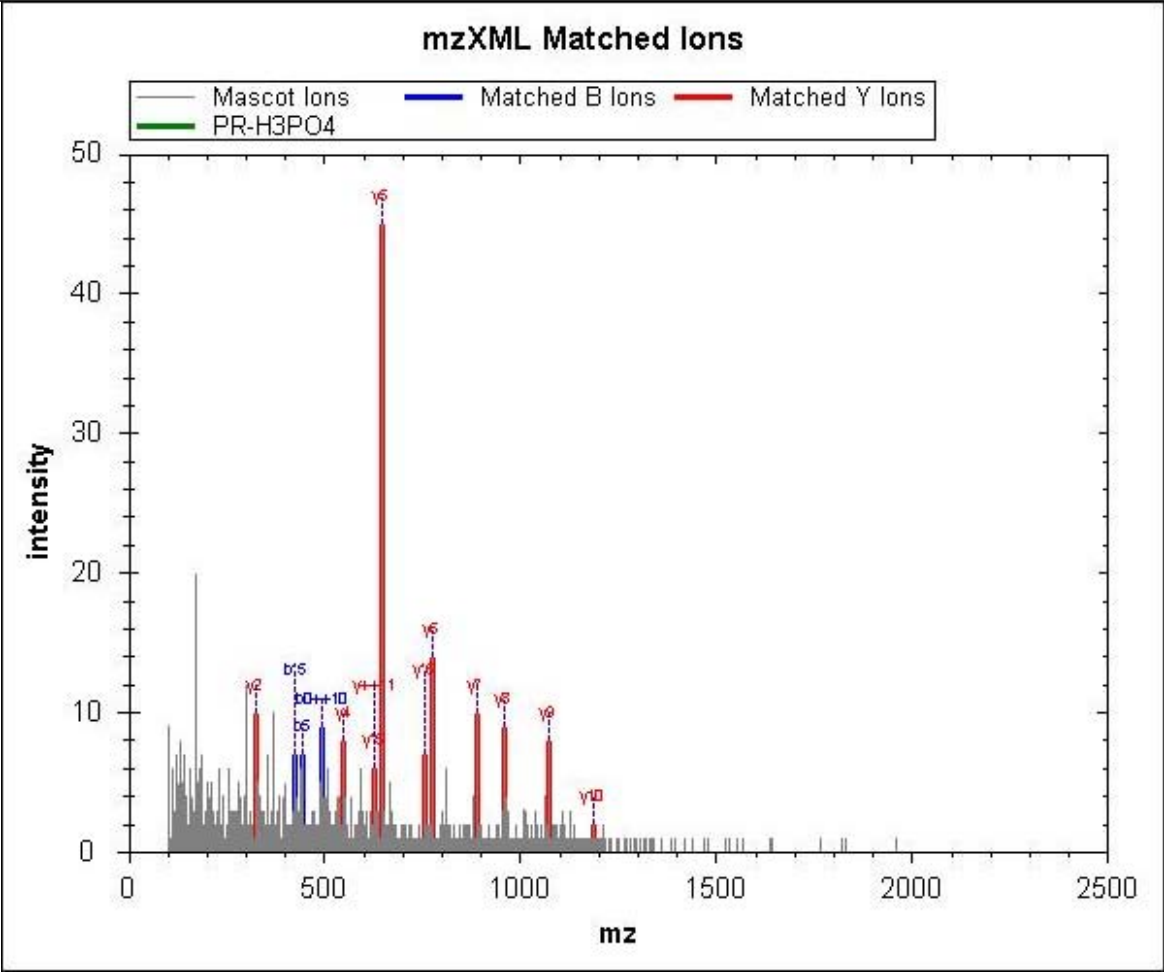

Protein index=1277, ACC No:IPI00010474

Peptide index=5998 MS/MS spectrum

Sequence: TLQIILEVVPPEEDKL, m/z:869.9968, charge:+ 2, Modification: , Mod Position:

Score: 40.4, Raw data:WET\_B1\_090616\_03.mzxml, MS/MS Elution time: 80.82567, Scan number:4493, Mass delta:0.0011, Rank:1

| No | b       | b++    | b*      | b*++   | b0      | b0++   | Seq | y       | y++    | y*      | y*++   | y0      | y0++   | RevNo |
|----|---------|--------|---------|--------|---------|--------|-----|---------|--------|---------|--------|---------|--------|-------|
| 1  | 102.05  | 51.53  |         |        | 84.04   | 42.53  | T   |         |        |         |        |         |        | 15    |
| 2  | 215.14  | 108.07 |         |        | 197.13  | 99.07  | L   | 1637.94 | 819.47 | 1620.91 | 810.96 | 1619.93 | 810.47 | 14    |
| 3  | 343.2   | 172.1  | 326.17  | 163.59 | 325.19  | 163.1  | Q   | 1524.85 | 762.93 | 1507.83 | 754.42 | 1506.84 | 753.92 | 13    |
| 4  | 456.28  | 228.64 | 439.26  | 220.13 | 438.27  | 219.64 | I   | 1396.79 | 698.9  | 1379.77 | 690.39 | 1378.78 | 689.9  | 12    |
| 5  | 569.37  | 285.19 | 552.34  | 276.67 | 551.36  | 276.18 | I   | 1283.71 | 642.36 | 1266.68 | 633.85 | 1265.7  | 633.35 | 11    |
| 6  | 682.45  | 341.73 | 665.42  | 333.22 | 664.44  | 332.72 | L   | 1170.63 | 585.82 | 1153.6  | 577.3  | 1152.61 | 576.81 | 10    |
| 7  | 811.49  | 406.25 | 794.47  | 397.74 | 793.48  | 397.24 | E   | 1057.54 | 529.27 | 1040.51 | 520.76 | 1039.53 | 520.27 | 9     |
| 8  | 910.56  | 455.78 | 893.53  | 447.27 | 892.55  | 446.78 | V   | 928.5   | 464.75 | 911.47  | 456.24 | 910.49  | 455.75 | 8     |
| 9  | 1009.63 | 505.32 | 992.6   | 496.8  | 991.62  | 496.31 | V   | 829.43  | 415.22 | 812.4   | 406.71 | 811.42  | 406.21 | 7     |
| 10 | 1106.68 | 553.84 | 1089.66 | 545.33 | 1088.67 | 544.84 | P   | 730.36  | 365.68 | 713.34  | 357.17 | 712.35  | 356.68 | 6     |
| 11 | 1235.72 | 618.37 | 1218.7  | 609.85 | 1217.71 | 609.36 | E   | 633.31  | 317.16 | 616.28  | 308.64 | 615.3   | 308.15 | 5     |
| 12 | 1364.77 | 682.89 | 1347.74 | 674.37 | 1346.76 | 673.88 | E   | 504.27  | 252.64 | 487.24  | 244.12 | 486.26  | 243.63 | 4     |
| 13 | 1479.79 | 740.4  | 1462.77 | 731.89 | 1461.78 | 731.4  | D   | 375.22  | 188.12 | 358.2   | 179.6  | 357.21  | 179.11 | 3     |
| 14 | 1607.89 | 804.45 | 1590.86 | 795.93 | 1589.88 | 795.44 | K   | 260.2   | 130.6  | 243.17  | 122.09 |         |        | 2     |
| 15 |         |        |         |        |         |        | L   | 132.1   | 66.55  |         |        |         |        | 1     |

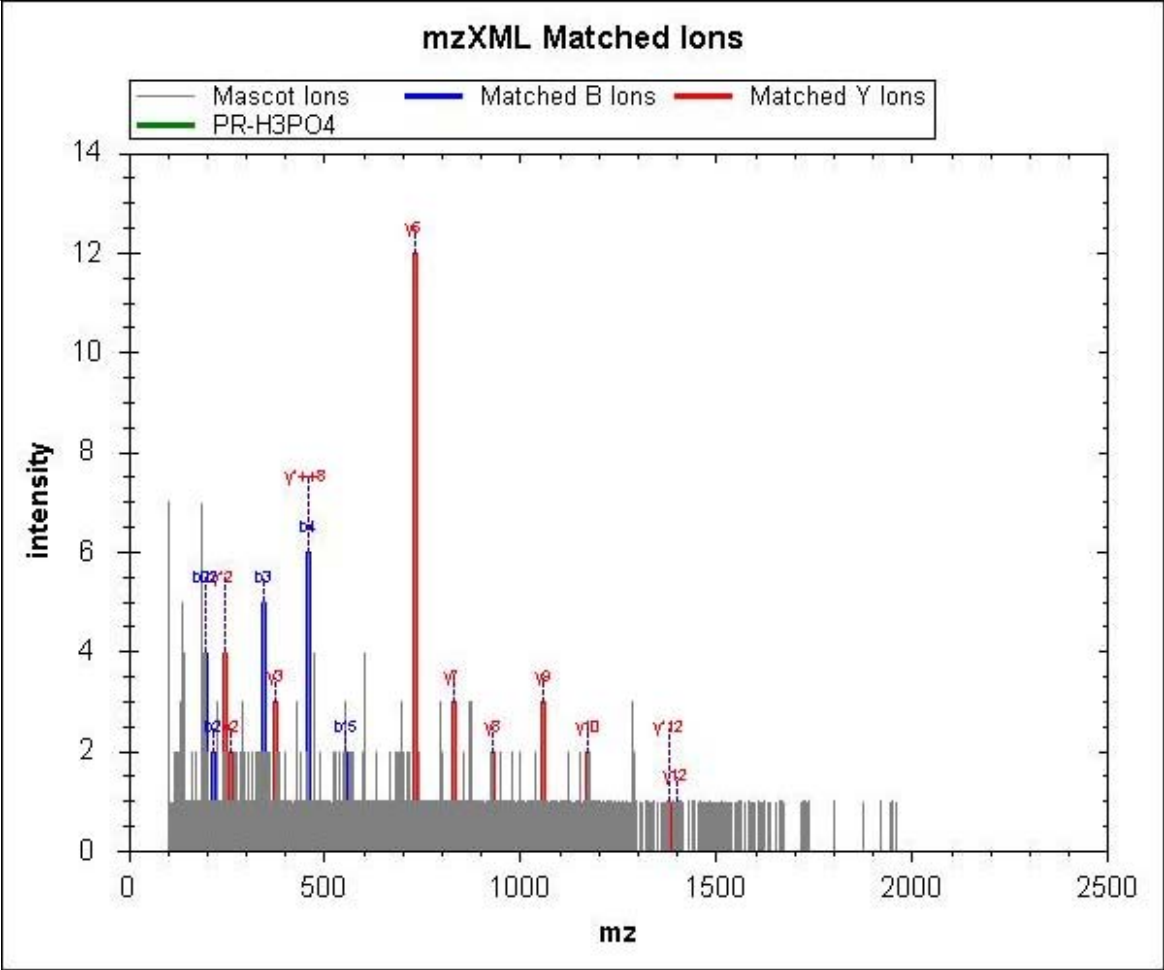

Protein index=1278, ACC No:IP100006675

Peptide index=6229 MS/MS spectrum

Sequence: ASETPTLQGLSFTVRPGELLAVVGPVGAGK, m/z:984.5428, charge:+ 3, Modification: , Mod Position:

Score: 33.72, Raw data:WET\_B1\_090616\_01.mzxml, MS/MS Elution time: 84.43449, Scan number:4671, Mass delta:-0.0063, Rank:1

| No | b       | b++     | b*      | b*++    | b0      | b0++    | Seq | y       | y++     | y*      | y*++    | y0      | y0++    | RevNo |
|----|---------|---------|---------|---------|---------|---------|-----|---------|---------|---------|---------|---------|---------|-------|
| 1  | 72.04   | 36.53   |         |         |         |         | A   |         |         |         |         |         |         | 30    |
| 2  | 159.08  | 80.04   |         |         | 141.07  | 71.04   | S   | 2880.58 | 1440.79 | 2863.56 | 1432.28 | 2862.57 | 1431.79 | 29    |
| 3  | 288.12  | 144.56  |         |         | 270.11  | 135.56  | E   | 2793.55 | 1397.28 | 2776.52 | 1388.77 | 2775.54 | 1388.27 | 28    |
| 4  | 389.17  | 195.09  |         |         | 371.16  | 186.08  | T   | 2664.51 | 1332.76 | 2647.48 | 1324.24 | 2646.5  | 1323.75 | 27    |
| 5  | 486.22  | 243.61  |         |         | 468.21  | 234.61  | P   | 2563.46 | 1282.23 | 2546.43 | 1273.72 | 2545.45 | 1273.23 | 26    |
| 6  | 587.27  | 294.14  |         |         | 569.26  | 285.13  | T   | 2466.41 | 1233.71 | 2449.38 | 1225.19 | 2448.4  | 1224.7  | 25    |
| 7  | 700.35  | 350.68  |         |         | 682.34  | 341.67  | L   | 2365.36 | 1183.18 | 2348.33 | 1174.67 | 2347.35 | 1174.18 | 24    |
| 8  | 828.41  | 414.71  | 811.38  | 406.2   | 810.4   | 405.7   | Q   | 2252.28 | 1126.64 | 2235.25 | 1118.13 | 2234.27 | 1117.64 | 23    |
| 9  | 885.43  | 443.22  | 868.4   | 434.71  | 867.42  | 434.21  | G   | 2124.22 | 1062.61 | 2107.19 | 1054.1  | 2106.21 | 1053.61 | 22    |
| 10 | 998.52  | 499.76  | 981.49  | 491.25  | 980.5   | 490.76  | L   | 2067.2  | 1034.1  | 2050.17 | 1025.59 | 2049.19 | 1025.1  | 21    |
| 11 | 1085.55 | 543.28  | 1068.52 | 534.76  | 1067.54 | 534.27  | S   | 1954.11 | 977.56  | 1937.09 | 969.05  | 1936.1  | 968.55  | 20    |
| 12 | 1232.62 | 616.81  | 1215.59 | 608.3   | 1214.61 | 607.81  | F   | 1867.08 | 934.04  | 1850.05 | 925.53  | 1849.07 | 925.04  | 19    |
| 13 | 1333.66 | 667.34  | 1316.64 | 658.82  | 1315.65 | 658.33  | T   | 1720.01 | 860.51  | 1702.98 | 852     | 1702    | 851.5   | 18    |
| 14 | 1432.73 | 716.87  | 1415.71 | 708.36  | 1414.72 | 707.86  | V   | 1618.96 | 809.99  | 1601.94 | 801.47  | 1600.95 | 800.98  | 17    |
| 15 | 1588.83 | 794.92  | 1571.81 | 786.41  | 1570.82 | 785.91  | R   | 1519.9  | 760.45  | 1502.87 | 751.94  | 1501.88 | 751.45  | 16    |
| 16 | 1685.89 | 843.45  | 1668.86 | 834.93  | 1667.88 | 834.44  | P   | 1363.79 | 682.4   | 1346.77 | 673.89  | 1345.78 | 673.4   | 15    |
| 17 | 1742.91 | 871.96  | 1725.88 | 863.44  | 1724.9  | 862.95  | G   | 1266.74 | 633.87  | 1249.72 | 625.36  | 1248.73 | 624.87  | 14    |
| 18 | 1871.95 | 936.48  | 1854.92 | 927.97  | 1853.94 | 927.47  | E   | 1209.72 | 605.36  | 1192.69 | 596.85  | 1191.71 | 596.36  | 13    |
| 19 | 1985.03 | 993.02  | 1968.01 | 984.51  | 1967.02 | 984.02  | L   | 1080.68 | 540.84  | 1063.65 | 532.33  |         |         | 12    |
| 20 | 2098.12 | 1049.56 | 2081.09 | 1041.05 | 2080.11 | 1040.56 | L   | 967.59  | 484.3   | 950.57  | 475.79  |         |         | 11    |
| 21 | 2169.16 | 1085.08 | 2152.13 | 1076.57 | 2151.14 | 1076.08 | A   | 854.51  | 427.76  | 837.48  | 419.25  |         |         | 10    |
| 22 | 2268.22 | 1134.62 | 2251.2  | 1126.1  | 2250.21 | 1125.61 | V   | 783.47  | 392.24  | 766.45  | 383.73  |         |         | 9     |
| 23 | 2367.29 | 1184.15 | 2350.27 | 1175.64 | 2349.28 | 1175.14 | V   | 684.4   | 342.71  | 667.38  | 334.19  |         |         | 8     |
| 24 | 2424.31 | 1212.66 | 2407.29 | 1204.15 | 2406.3  | 1203.66 | G   | 585.34  | 293.17  | 568.31  | 284.66  |         |         | 7     |
| 25 | 2521.37 | 1261.19 | 2504.34 | 1252.67 | 2503.36 | 1252.18 | P   | 528.31  | 264.66  | 511.29  | 256.15  |         |         | 6     |
| 26 | 2620.43 | 1310.72 | 2603.41 | 1302.21 | 2602.42 | 1301.72 | V   | 431.26  | 216.13  | 414.23  | 207.62  |         |         | 5     |
| 27 | 2677.46 | 1339.23 | 2660.43 | 1330.72 | 2659.45 | 1330.23 | G   | 332.19  | 166.6   | 315.17  | 158.09  |         |         | 4     |
| 28 | 2748.49 | 1374.75 | 2731.47 | 1366.24 | 2730.48 | 1365.74 | A   | 275.17  | 138.09  | 258.14  | 129.58  |         |         | 3     |
| 29 | 2805.51 | 1403.26 | 2788.49 | 1394.75 | 2787.5  | 1394.26 | G   | 204.13  | 102.57  | 187.11  | 94.06   |         |         | 2     |
| 30 |         |         |         |         |         |         | K   | 147.11  | 74.06   | 130.09  | 65.55   |         |         | 1     |

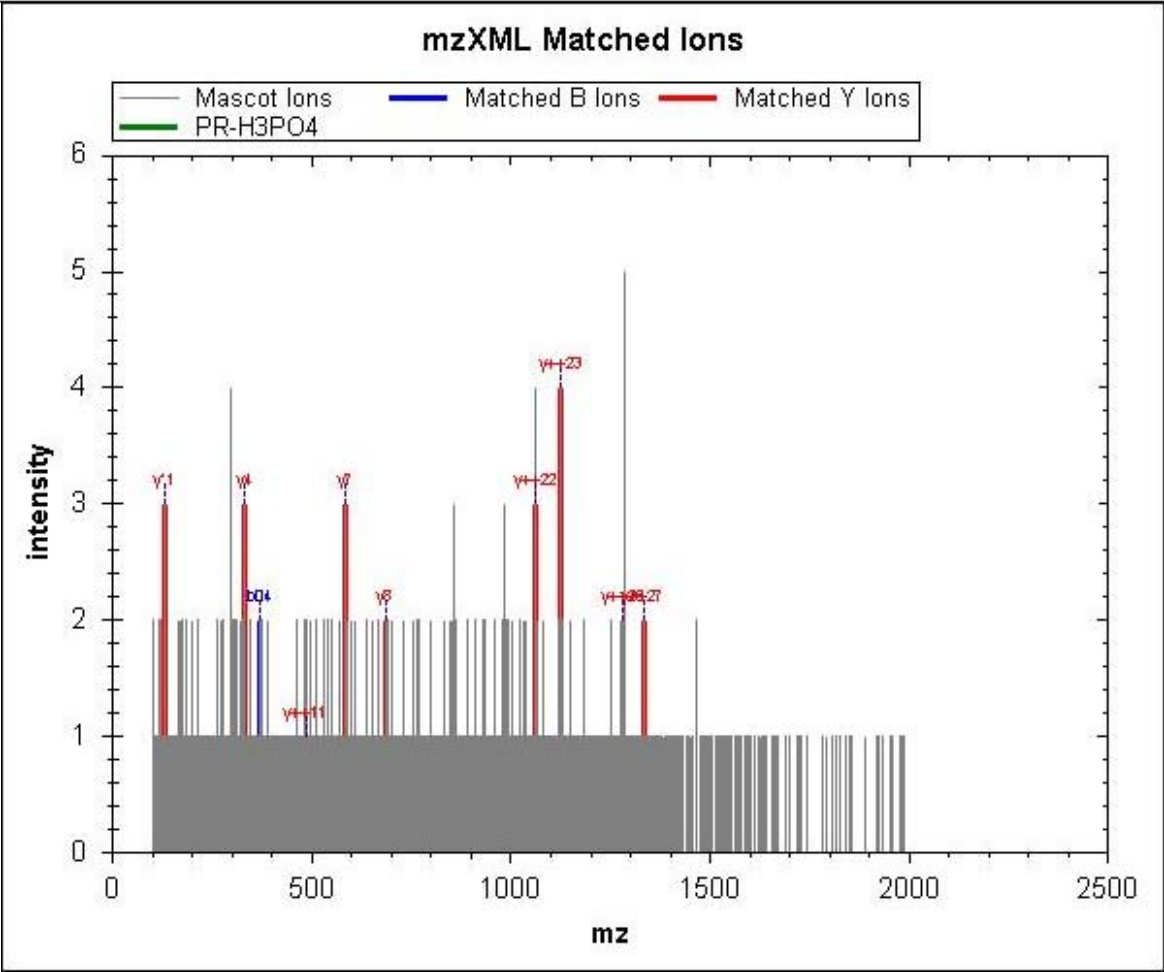

Protein index=1279, ACC No:IPI00178431

Peptide index=3845 MS/MS spectrum

Sequence: VKDILQNVFK, m/z:602.356, charge:+ 2, Modification: , Mod Position:

Score: 38.85, Raw data:WET\_B1\_090616\_01.mzxml, MS/MS Elution time: 56.56166, Scan number:3052, Mass delta:-0.0049, Rank:1

| No | b      | b++    | b*      | b*++   | b0      | b0++   | Seq | y       | y++    | y*      | y*++   | y0      | y0++   | RevNo |
|----|--------|--------|---------|--------|---------|--------|-----|---------|--------|---------|--------|---------|--------|-------|
| 1  | 100.08 | 50.54  |         |        |         |        | V   |         |        |         |        |         |        | 10    |
| 2  | 228.17 | 114.59 | 211.14  | 106.08 |         |        | K   | 1104.64 | 552.82 | 1087.61 | 544.31 | 1086.63 | 543.82 | 9     |
| 3  | 343.2  | 172.1  | 326.17  | 163.59 | 325.19  | 163.1  | D   | 976.55  | 488.78 | 959.52  | 480.26 | 958.54  | 479.77 | 8     |
| 4  | 456.28 | 228.64 | 439.26  | 220.13 | 438.27  | 219.64 | I   | 861.52  | 431.26 | 844.49  | 422.75 |         |        | 7     |
| 5  | 569.37 | 285.19 | 552.34  | 276.67 | 551.36  | 276.18 | L   | 748.44  | 374.72 | 731.41  | 366.21 |         |        | 6     |
| 6  | 697.42 | 349.22 | 680.4   | 340.7  | 679.41  | 340.21 | Q   | 635.35  | 318.18 | 618.32  | 309.67 |         |        | 5     |
| 7  | 811.47 | 406.24 | 794.44  | 397.72 | 793.46  | 397.23 | N   | 507.29  | 254.15 | 490.27  | 245.64 |         |        | 4     |
| 8  | 910.54 | 455.77 | 893.51  | 447.26 | 892.53  | 446.77 | V   | 393.25  | 197.13 | 376.22  | 188.62 |         |        | 3     |
| 9  | 1057.6 | 529.31 | 1040.58 | 520.79 | 1039.59 | 520.3  | F   | 294.18  | 147.59 | 277.15  | 139.08 |         |        | 2     |
| 10 |        |        |         |        |         |        | K   | 147.11  | 74.06  | 130.09  | 65.55  |         |        | 1     |

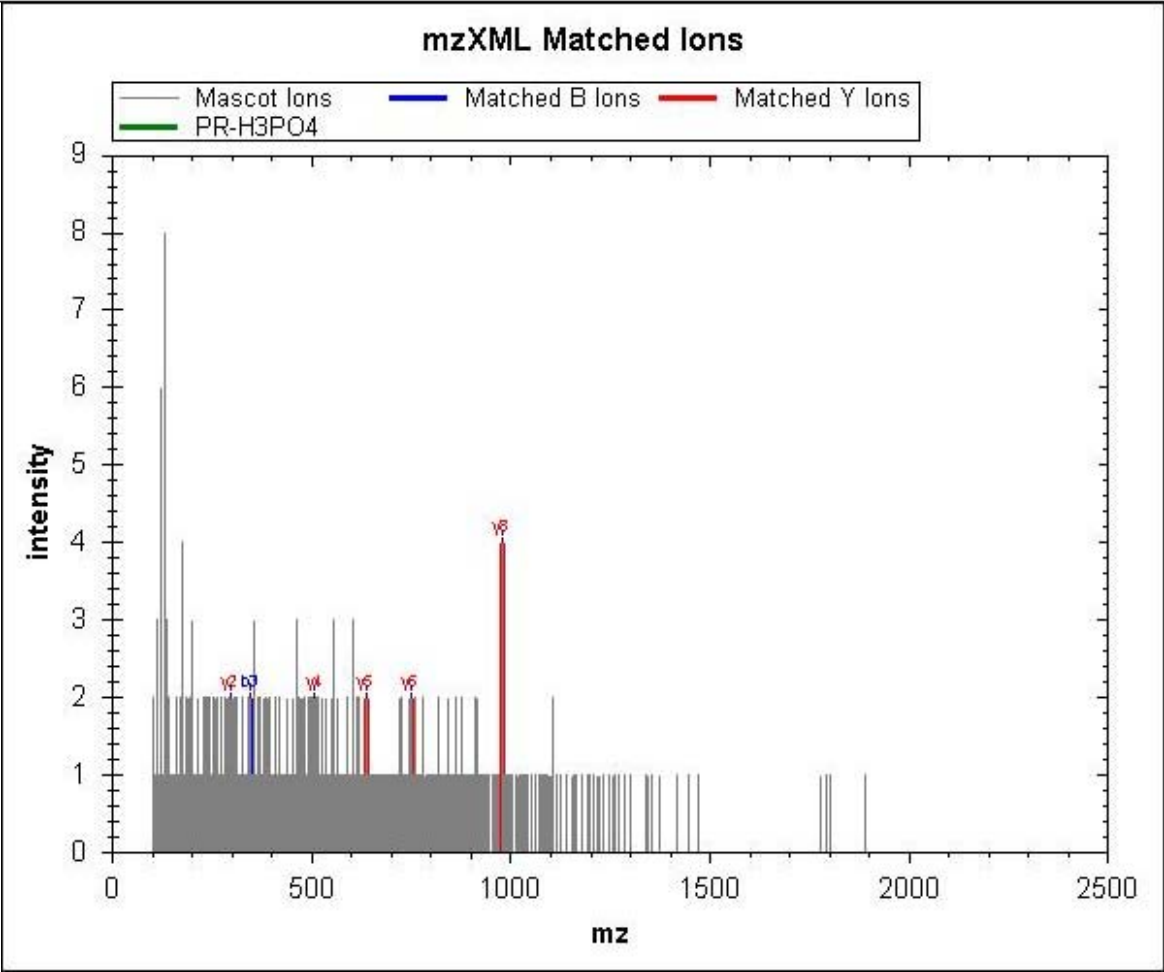

Protein index=1280, ACC No: IPI00029012

Peptide index=5287 MS/MS spectrum

Sequence: VLLATLSIPITPER, m/z: 761.9588, charge: + 2, Modification: , Mod Position:

Score: 62.92, Raw data: WET\_B1\_090616\_01.mzxml, MS/MS Elution time: 71.53867, Scan number: 3922, Mass delta: -0.0099, Rank: 1

| No | b       | b++    | b0      | b0++   | Seq | y       | y++    | y*      | y*++   | y0      | y0++   | RevNo |
|----|---------|--------|---------|--------|-----|---------|--------|---------|--------|---------|--------|-------|
| 1  | 100.08  | 50.54  |         |        | V   |         |        |         |        |         |        | 14    |
| 2  | 213.16  | 107.08 |         |        | L   | 1423.85 | 712.43 | 1406.83 | 703.92 | 1405.84 | 703.42 | 13    |
| 3  | 326.24  | 163.63 |         |        | L   | 1310.77 | 655.89 | 1293.74 | 647.37 | 1292.76 | 646.88 | 12    |
| 4  | 397.28  | 199.14 |         |        | A   | 1197.68 | 599.35 | 1180.66 | 590.83 | 1179.67 | 590.34 | 11    |
| 5  | 498.33  | 249.67 | 480.32  | 240.66 | T   | 1126.65 | 563.83 | 1109.62 | 555.31 | 1108.64 | 554.82 | 10    |
| 6  | 611.41  | 306.21 | 593.4   | 297.2  | L   | 1025.6  | 513.3  | 1008.57 | 504.79 | 1007.59 | 504.3  | 9     |
| 7  | 698.44  | 349.73 | 680.43  | 340.72 | S   | 912.51  | 456.76 | 895.49  | 448.25 | 894.5   | 447.76 | 8     |
| 8  | 811.53  | 406.27 | 793.52  | 397.26 | I   | 825.48  | 413.25 | 808.46  | 404.73 | 807.47  | 404.24 | 7     |
| 9  | 908.58  | 454.79 | 890.57  | 445.79 | P   | 712.4   | 356.7  | 695.37  | 348.19 | 694.39  | 347.7  | 6     |
| 10 | 1021.67 | 511.34 | 1003.65 | 502.33 | I   | 615.35  | 308.18 | 598.32  | 299.66 | 597.34  | 299.17 | 5     |
| 11 | 1122.71 | 561.86 | 1104.7  | 552.85 | T   | 502.26  | 251.63 | 485.24  | 243.12 | 484.25  | 242.63 | 4     |
| 12 | 1219.77 | 610.39 | 1201.76 | 601.38 | P   | 401.21  | 201.11 | 384.19  | 192.6  | 383.2   | 192.11 | 3     |

|    |         |        |        |       |   |        |        |        |        |        |        |   |
|----|---------|--------|--------|-------|---|--------|--------|--------|--------|--------|--------|---|
| 13 | 1348.81 | 674.91 | 1330.8 | 665.9 | E | 304.16 | 152.58 | 287.13 | 144.07 | 286.15 | 143.58 | 2 |
| 14 |         |        |        |       | R | 175.12 | 88.06  | 158.09 | 79.55  |        |        | 1 |

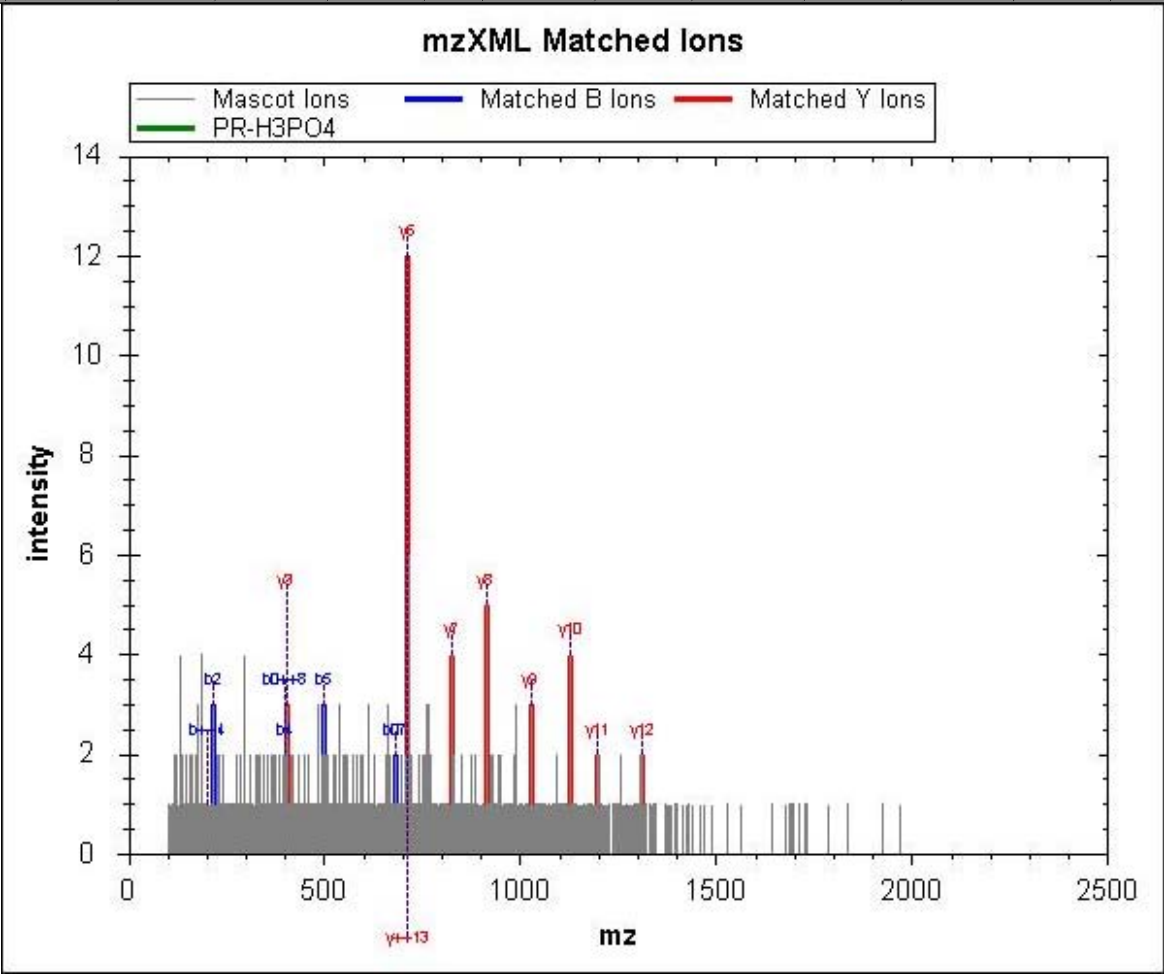

Protein index=1281, ACC No:IPI00022300

Peptide index=2151 MS/MS spectrum

Sequence: FTVIYNEQMASK, m/z:723.8495, charge:+ 2, Modification: Oxidation (M), Mod Position: 0.000000001000.0

Score: 61.25, Raw data:WET\_B1\_090616\_03.mzxml, MS/MS Elution time: 41.39583, Scan number:2184, Mass delta:0.005, Rank:1

| No | b       | b++    | b*      | b*++   | b0      | b0++   | Seq | y       | y++    | y*      | y*++   | y0      | y0++   | RevNo |
|----|---------|--------|---------|--------|---------|--------|-----|---------|--------|---------|--------|---------|--------|-------|
| 1  | 148.08  | 74.54  |         |        |         |        | F   |         |        |         |        |         |        | 12    |
| 2  | 249.12  | 125.07 |         |        | 231.11  | 116.06 | T   | 1235.63 | 618.32 | 1218.6  | 609.8  | 1217.62 | 609.31 | 11    |
| 3  | 348.19  | 174.6  |         |        | 330.18  | 165.59 | V   | 1134.58 | 567.79 | 1117.55 | 559.28 | 1116.57 | 558.79 | 10    |
| 4  | 461.28  | 231.14 |         |        | 443.27  | 222.14 | I   | 1035.51 | 518.26 | 1018.48 | 509.75 | 1017.5  | 509.25 | 9     |
| 5  | 624.34  | 312.67 |         |        | 606.33  | 303.67 | Y   | 922.43  | 461.72 | 905.4   | 453.2  | 904.42  | 452.71 | 8     |
| 6  | 738.38  | 369.69 | 721.36  | 361.18 | 720.37  | 360.69 | N   | 759.36  | 380.19 | 742.34  | 371.67 | 741.35  | 371.18 | 7     |
| 7  | 867.42  | 434.22 | 850.4   | 425.7  | 849.41  | 425.21 | E   | 645.32  | 323.16 | 628.29  | 314.65 | 627.31  | 314.16 | 6     |
| 8  | 995.48  | 498.25 | 978.46  | 489.73 | 977.47  | 489.24 | Q   | 516.28  | 258.64 | 499.25  | 250.13 | 498.27  | 249.64 | 5     |
| 9  | 1078.52 | 539.76 | 1061.49 | 531.25 | 1060.51 | 530.76 | M   | 388.22  | 194.61 | 371.19  | 186.1  | 370.21  | 185.61 | 4     |

|    |         |        |         |        |         |        |   |        |        |        |        |        |        |   |
|----|---------|--------|---------|--------|---------|--------|---|--------|--------|--------|--------|--------|--------|---|
| 10 | 1149.56 | 575.28 | 1132.53 | 566.77 | 1131.55 | 566.28 | A | 305.18 | 153.09 | 288.16 | 144.58 | 287.17 | 144.09 | 3 |
| 11 | 1236.59 | 618.8  | 1219.56 | 610.29 | 1218.58 | 609.79 | S | 234.14 | 117.58 | 217.12 | 109.06 | 216.13 | 108.57 | 2 |
| 12 |         |        |         |        |         |        | K | 147.11 | 74.06  | 130.09 | 65.55  |        |        | 1 |

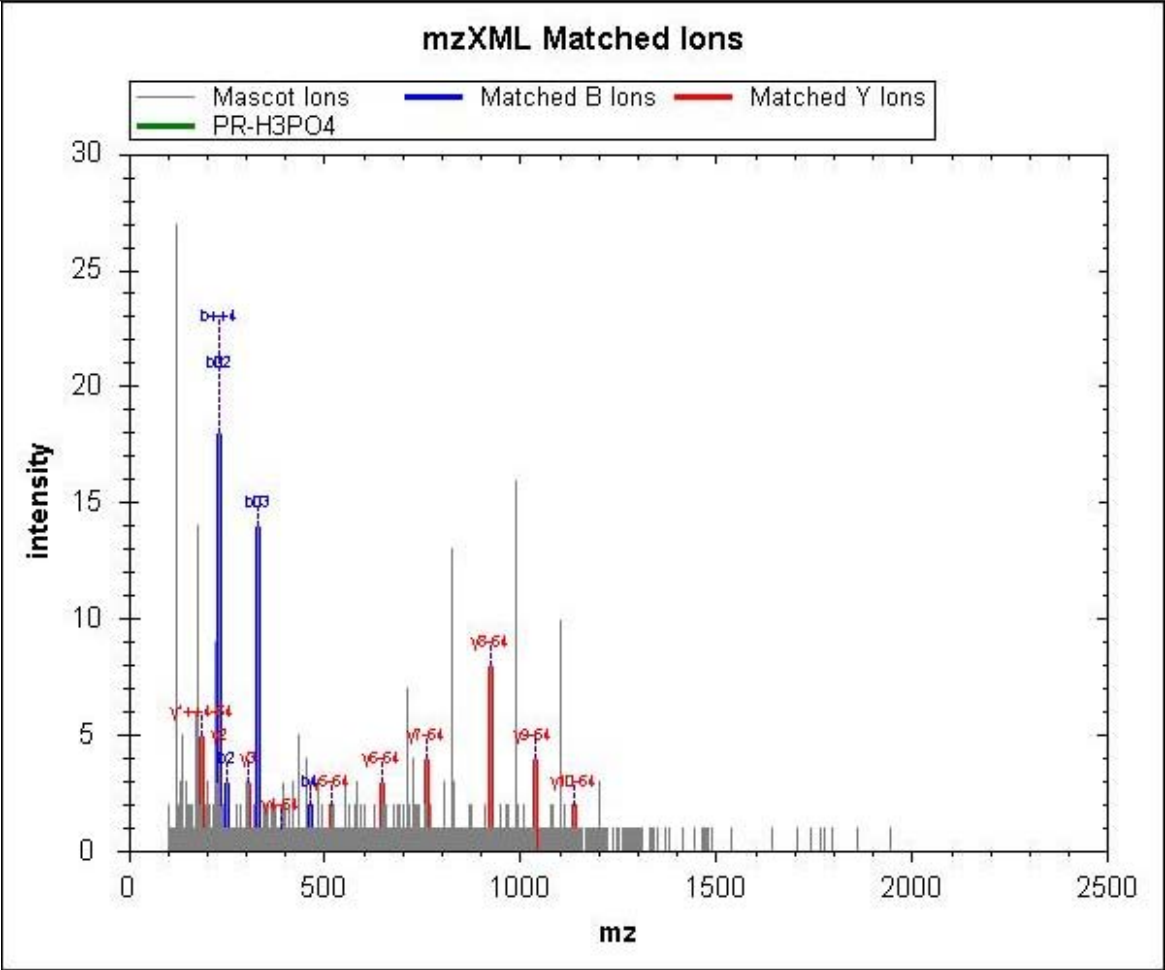

Protein index=1282, ACC No: IPI00239405

Peptide index=6952 MS/MS spectrum

Sequence: NLLGELNPSIPLLPDDILSQIR, m/z:1215.69, charge:+ 2, Modification: , Mod Position:

Score: 59.51, Raw data:WET\_B2\_090616\_02.mzxml, MS/MS Elution time: 101.704, Scan number:5730, Mass delta:0.0007, Rank:1

| No | b      | b++    | b*     | b*++   | b0     | b0++   | Seq | y       | y++     | y*      | y*++    | y0      | y0++    | RevNo |
|----|--------|--------|--------|--------|--------|--------|-----|---------|---------|---------|---------|---------|---------|-------|
| 1  | 115.05 | 58.03  | 98.02  | 49.52  |        |        | N   |         |         |         |         |         |         | 22    |
| 2  | 228.13 | 114.57 | 211.11 | 106.06 |        |        | L   | 2316.32 | 1158.66 | 2299.29 | 1150.15 | 2298.31 | 1149.66 | 21    |
| 3  | 341.22 | 171.11 | 324.19 | 162.6  |        |        | L   | 2203.23 | 1102.12 | 2186.21 | 1093.61 | 2185.22 | 1093.11 | 20    |
| 4  | 398.24 | 199.62 | 381.21 | 191.11 |        |        | G   | 2090.15 | 1045.58 | 2073.12 | 1037.06 | 2072.14 | 1036.57 | 19    |
| 5  | 527.28 | 264.14 | 510.26 | 255.63 | 509.27 | 255.14 | E   | 2033.13 | 1017.07 | 2016.1  | 1008.55 | 2015.12 | 1008.06 | 18    |
| 6  | 640.37 | 320.69 | 623.34 | 312.17 | 622.36 | 311.68 | L   | 1904.09 | 952.55  | 1887.06 | 944.03  | 1886.07 | 943.54  | 17    |
| 7  | 754.41 | 377.71 | 737.38 | 369.2  | 736.4  | 368.7  | N   | 1791    | 896     | 1773.97 | 887.49  | 1772.99 | 887     | 16    |
| 8  | 851.46 | 426.23 | 834.44 | 417.72 | 833.45 | 417.23 | P   | 1676.96 | 838.98  | 1659.93 | 830.47  | 1658.95 | 829.98  | 15    |
| 9  | 938.49 | 469.75 | 921.47 | 461.24 | 920.48 | 460.75 | S   | 1579.91 | 790.46  | 1562.88 | 781.94  | 1561.89 | 781.45  | 14    |

|    |         |         |         |         |         |         |   |         |        |         |        |         |        |    |
|----|---------|---------|---------|---------|---------|---------|---|---------|--------|---------|--------|---------|--------|----|
| 10 | 1051.58 | 526.29  | 1034.55 | 517.78  | 1033.57 | 517.29  | I | 1492.87 | 746.94 | 1475.85 | 738.43 | 1474.86 | 737.94 | 13 |
| 11 | 1148.63 | 574.82  | 1131.6  | 566.31  | 1130.62 | 565.81  | P | 1379.79 | 690.4  | 1362.76 | 681.89 | 1361.78 | 681.39 | 12 |
| 12 | 1261.72 | 631.36  | 1244.69 | 622.85  | 1243.7  | 622.36  | L | 1282.74 | 641.87 | 1265.71 | 633.36 | 1264.73 | 632.87 | 11 |
| 13 | 1374.8  | 687.9   | 1357.77 | 679.39  | 1356.79 | 678.9   | L | 1169.65 | 585.33 | 1152.63 | 576.82 | 1151.64 | 576.32 | 10 |
| 14 | 1471.85 | 736.43  | 1454.83 | 727.92  | 1453.84 | 727.42  | P | 1056.57 | 528.79 | 1039.54 | 520.27 | 1038.56 | 519.78 | 9  |
| 15 | 1586.88 | 793.94  | 1569.85 | 785.43  | 1568.87 | 784.94  | D | 959.52  | 480.26 | 942.49  | 471.75 | 941.51  | 471.26 | 8  |
| 16 | 1701.91 | 851.46  | 1684.88 | 842.94  | 1683.9  | 842.45  | D | 844.49  | 422.75 | 827.46  | 414.23 | 826.48  | 413.74 | 7  |
| 17 | 1814.99 | 908     | 1797.96 | 899.49  | 1796.98 | 898.99  | I | 729.46  | 365.23 | 712.44  | 356.72 | 711.45  | 356.23 | 6  |
| 18 | 1928.07 | 964.54  | 1911.05 | 956.03  | 1910.06 | 955.54  | L | 616.38  | 308.69 | 599.35  | 300.18 | 598.37  | 299.69 | 5  |
| 19 | 2015.11 | 1008.06 | 1998.08 | 999.54  | 1997.1  | 999.05  | S | 503.29  | 252.15 | 486.27  | 243.64 | 485.28  | 243.15 | 4  |
| 20 | 2143.16 | 1072.09 | 2126.14 | 1063.57 | 2125.15 | 1063.08 | Q | 416.26  | 208.63 | 399.24  | 200.12 |         |        | 3  |
| 21 | 2256.25 | 1128.63 | 2239.22 | 1120.11 | 2238.24 | 1119.62 | I | 288.2   | 144.61 | 271.18  | 136.09 |         |        | 2  |
| 22 |         |         |         |         |         |         | R | 175.12  | 88.06  | 158.09  | 79.55  |         |        | 1  |

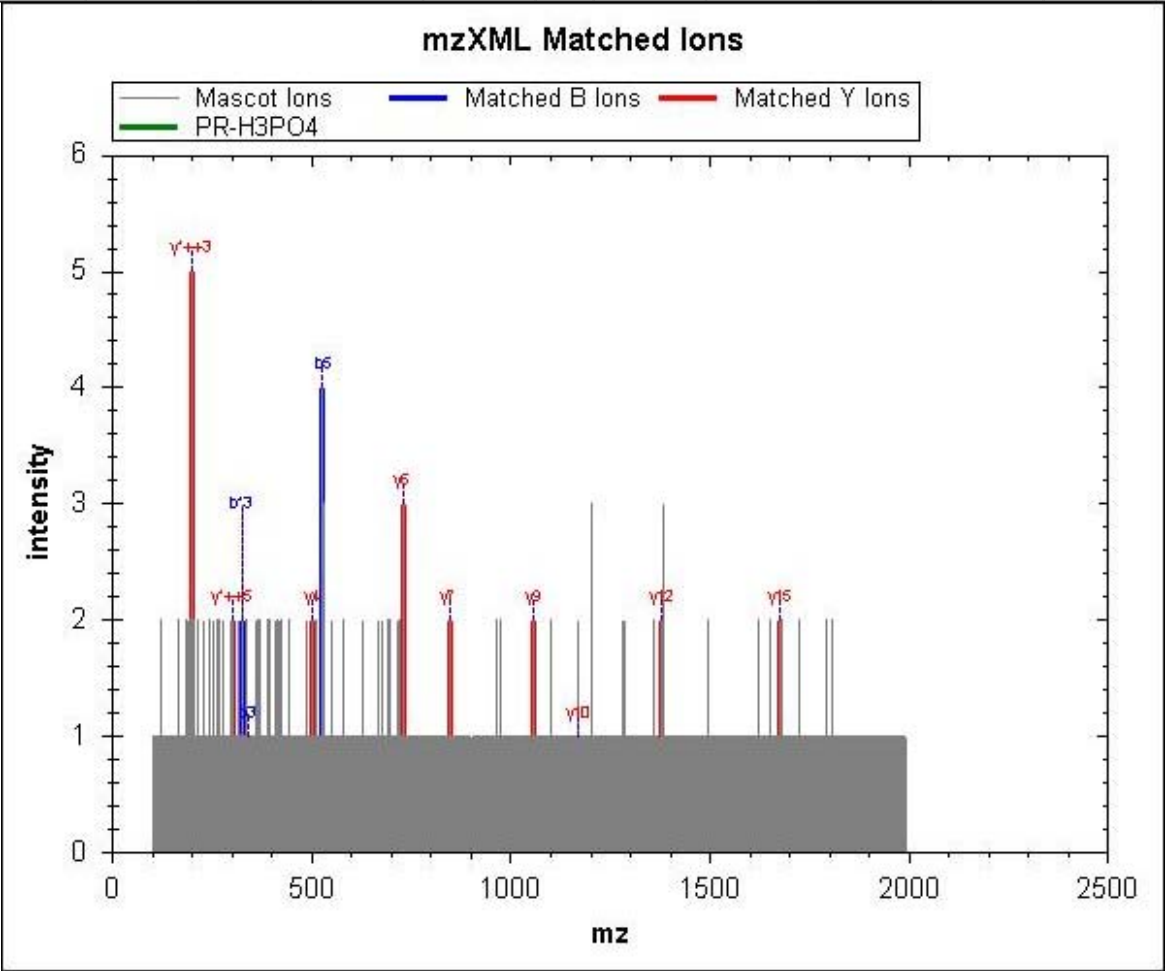

Protein index=1283, ACC No: IPI00178700

Peptide index=5289 MS/MS spectrum

Sequence: TGESILSLLR, m/z:544.819, charge:+ 2, Modification: , Mod Position:

Score: 65.55, Raw data:WET\_B1\_090616\_02.mzxml, MS/MS Elution time: 71.651, Scan number:3955, Mass delta:-0.0002, Rank:1

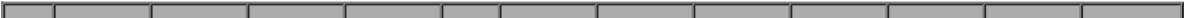



|    |         |        |         |        |         |        |   |         |        |         |        |         |        |    |
|----|---------|--------|---------|--------|---------|--------|---|---------|--------|---------|--------|---------|--------|----|
| 1  | 114.09  | 57.55  |         |        |         |        | L |         |        |         |        |         |        | 12 |
| 2  | 215.14  | 108.07 |         |        | 197.13  | 99.07  | T | 1300.66 | 650.83 | 1283.63 | 642.32 | 1282.65 | 641.83 | 11 |
| 3  | 330.17  | 165.59 |         |        | 312.16  | 156.58 | D | 1199.61 | 600.31 | 1182.59 | 591.8  | 1181.6  | 591.3  | 10 |
| 4  | 477.23  | 239.12 |         |        | 459.22  | 230.12 | F | 1084.59 | 542.8  | 1067.56 | 534.28 |         |        | 9  |
| 5  | 591.28  | 296.14 | 574.25  | 287.63 | 573.27  | 287.14 | N | 937.52  | 469.26 | 920.49  | 460.75 |         |        | 8  |
| 6  | 738.35  | 369.68 | 721.32  | 361.16 | 720.34  | 360.67 | F | 823.47  | 412.24 | 806.45  | 403.73 |         |        | 7  |
| 7  | 851.43  | 426.22 | 834.4   | 417.71 | 833.42  | 417.21 | L | 676.41  | 338.71 | 659.38  | 330.19 |         |        | 6  |
| 8  | 998.47  | 499.74 | 981.44  | 491.22 | 980.45  | 490.73 | M | 563.32  | 282.16 | 546.3   | 273.65 |         |        | 5  |
| 9  | 1097.53 | 549.27 | 1080.51 | 540.76 | 1079.52 | 540.27 | V | 416.29  | 208.65 | 399.26  | 200.13 |         |        | 4  |
| 10 | 1210.62 | 605.81 | 1193.59 | 597.3  | 1192.61 | 596.81 | L | 317.22  | 159.11 | 300.19  | 150.6  |         |        | 3  |
| 11 | 1267.64 | 634.32 | 1250.61 | 625.81 | 1249.63 | 625.32 | G | 204.13  | 102.57 | 187.11  | 94.06  |         |        | 2  |
| 12 |         |        |         |        |         |        | K | 147.11  | 74.06  | 130.09  | 65.55  |         |        | 1  |

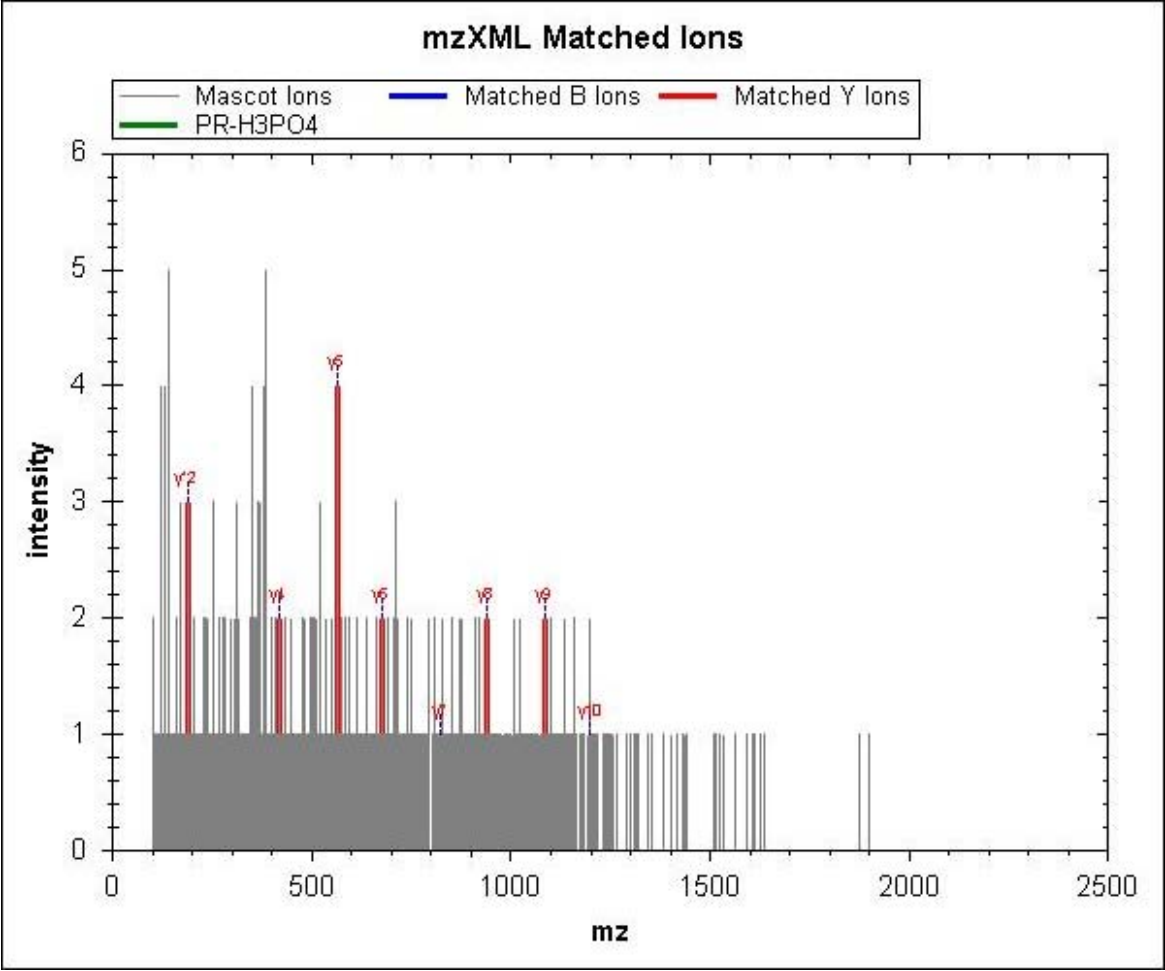

Protein index=1286, ACC No: IPI00023097

Peptide index=7197 MS/MS spectrum

Sequence: EILEQLLEAIVVATNPGR, m/z:1026.586, charge:+ 2, Modification: , Mod Position:

Score: 44.56, Raw data:WET\_B1\_090616\_03.mzxml, MS/MS Elution time: 111.9738, Scan number:6411, Mass delta:0.0386, Rank:1

| No | b | b++ | b* | b*++ | b0 | b0++ | Seq | y | y++ | y* | y*++ | y0 | y0++ | RevNo |
|----|---|-----|----|------|----|------|-----|---|-----|----|------|----|------|-------|
|    |   |     |    |      |    |      |     |   |     |    |      |    |      |       |

|    |         |        |         |        |         |        |   |         |        |         |        |         |        |    |
|----|---------|--------|---------|--------|---------|--------|---|---------|--------|---------|--------|---------|--------|----|
| 1  | 130.05  | 65.53  |         |        | 112.04  | 56.52  | E |         |        |         |        |         |        | 19 |
| 2  | 243.13  | 122.07 |         |        | 225.12  | 113.07 | I | 1923.09 | 962.05 | 1906.06 | 953.54 | 1905.08 | 953.04 | 18 |
| 3  | 356.22  | 178.61 |         |        | 338.21  | 169.61 | L | 1810.01 | 905.51 | 1792.98 | 896.99 | 1792    | 896.5  | 17 |
| 4  | 485.26  | 243.13 |         |        | 467.25  | 234.13 | E | 1696.92 | 848.97 | 1679.9  | 840.45 | 1678.91 | 839.96 | 16 |
| 5  | 613.32  | 307.16 | 596.29  | 298.65 | 595.31  | 298.16 | Q | 1567.88 | 784.44 | 1550.85 | 775.93 | 1549.87 | 775.44 | 15 |
| 6  | 726.4   | 363.71 | 709.38  | 355.19 | 708.39  | 354.7  | L | 1439.82 | 720.41 | 1422.8  | 711.9  | 1421.81 | 711.41 | 14 |
| 7  | 839.49  | 420.25 | 822.46  | 411.73 | 821.48  | 411.24 | L | 1326.74 | 663.87 | 1309.71 | 655.36 | 1308.73 | 654.87 | 13 |
| 8  | 968.53  | 484.77 | 951.5   | 476.26 | 950.52  | 475.76 | E | 1213.65 | 607.33 | 1196.63 | 598.82 | 1195.64 | 598.33 | 12 |
| 9  | 1039.57 | 520.29 | 1022.54 | 511.77 | 1021.56 | 511.28 | A | 1084.61 | 542.81 | 1067.58 | 534.3  | 1066.6  | 533.8  | 11 |
| 10 | 1152.65 | 576.83 | 1135.62 | 568.32 | 1134.64 | 567.82 | I | 1013.57 | 507.29 | 996.55  | 498.78 | 995.56  | 498.29 | 10 |
| 11 | 1251.72 | 626.36 | 1234.69 | 617.85 | 1233.71 | 617.36 | V | 900.49  | 450.75 | 883.46  | 442.24 | 882.48  | 441.74 | 9  |
| 12 | 1350.79 | 675.9  | 1333.76 | 667.38 | 1332.78 | 666.89 | V | 801.42  | 401.21 | 784.39  | 392.7  | 783.41  | 392.21 | 8  |
| 13 | 1421.82 | 711.42 | 1404.8  | 702.9  | 1403.81 | 702.41 | A | 702.35  | 351.68 | 685.33  | 343.17 | 684.34  | 342.67 | 7  |
| 14 | 1522.87 | 761.94 | 1505.85 | 753.43 | 1504.86 | 752.93 | T | 631.32  | 316.16 | 614.29  | 307.65 | 613.31  | 307.16 | 6  |
| 15 | 1636.92 | 818.96 | 1619.89 | 810.45 | 1618.91 | 809.96 | N | 530.27  | 265.64 | 513.24  | 257.12 | 512.26  | 256.63 | 5  |
| 16 | 1733.97 | 867.49 | 1716.94 | 858.97 | 1715.96 | 858.48 | P | 416.23  | 208.62 | 399.2   | 200.1  | 398.21  | 199.61 | 4  |
| 17 | 1821    | 911    | 1803.97 | 902.49 | 1802.99 | 902    | S | 319.17  | 160.09 | 302.15  | 151.58 | 301.16  | 151.08 | 3  |
| 18 | 1878.02 | 939.51 | 1861    | 931    | 1860.01 | 930.51 | G | 232.14  | 116.57 | 215.11  | 108.06 |         |        | 2  |
| 19 |         |        |         |        |         |        | R | 175.12  | 88.06  | 158.09  | 79.55  |         |        | 1  |

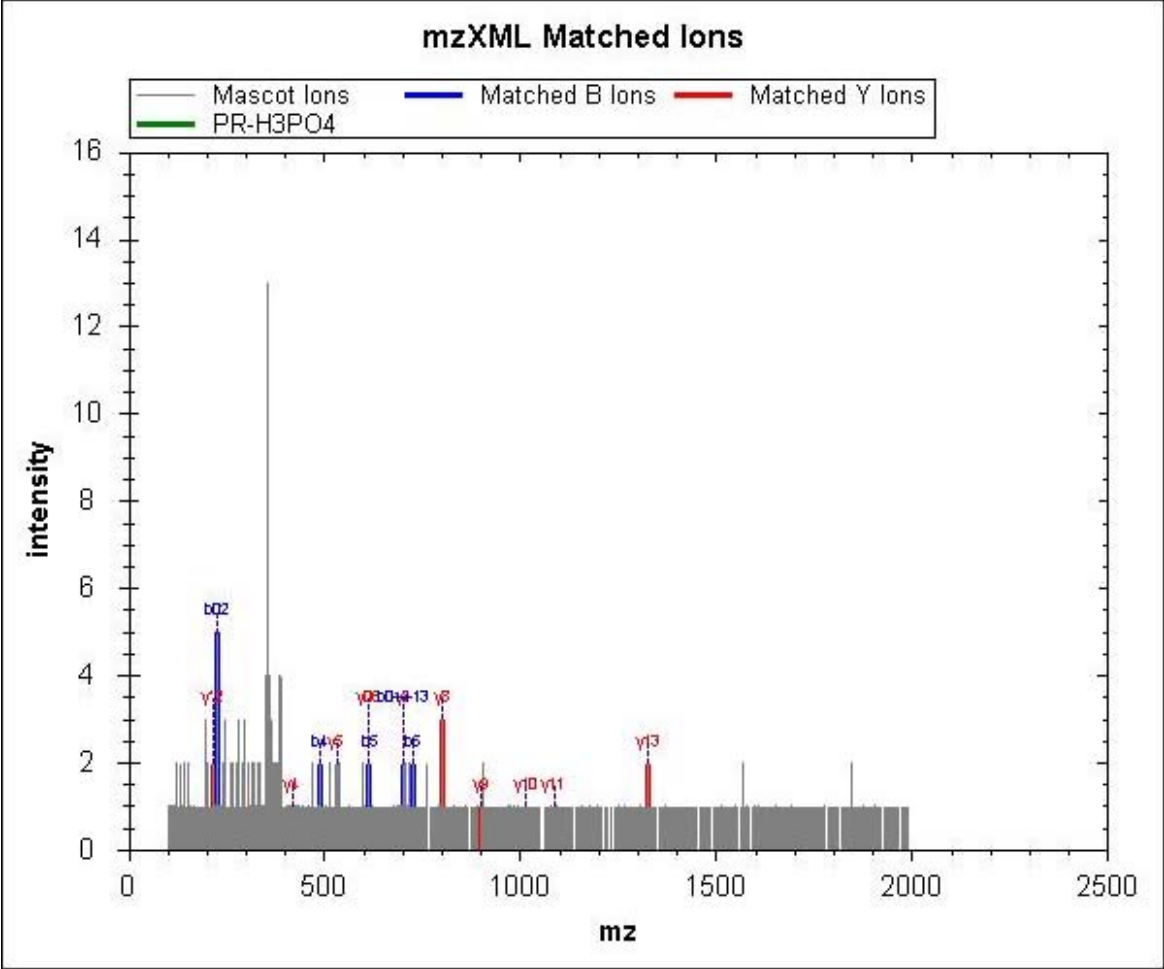

Protein index=1287, ACC No:IP100024804

Peptide index=4898 MS/MS spectrum

Sequence: DIVPGDIVEVAVGDK, m/z:763.4074, charge:+ 2, Modification: , Mod Position:

Score: 58.48, Raw data:WET\_B1\_090616\_02.mzxml, MS/MS Elution time: 66.95617, Scan number:3680, Mass delta:-0.0034, Rank:1

| No | b       | b++    | b0      | b0++   | Seq | y       | y++    | y*      | y*++   | y0      | y0++   | RevNo |
|----|---------|--------|---------|--------|-----|---------|--------|---------|--------|---------|--------|-------|
| 1  | 116.03  | 58.52  | 98.02   | 49.52  | D   |         |        |         |        |         |        | 15    |
| 2  | 229.12  | 115.06 | 211.11  | 106.06 | I   | 1410.78 | 705.9  | 1393.76 | 697.38 | 1392.77 | 696.89 | 14    |
| 3  | 328.19  | 164.6  | 310.18  | 155.59 | V   | 1297.7  | 649.35 | 1280.67 | 640.84 | 1279.69 | 640.35 | 13    |
| 4  | 425.24  | 213.12 | 407.23  | 204.12 | P   | 1198.63 | 599.82 | 1181.6  | 591.31 | 1180.62 | 590.81 | 12    |
| 5  | 482.26  | 241.63 | 464.25  | 232.63 | G   | 1101.58 | 551.29 | 1084.55 | 542.78 | 1083.57 | 542.29 | 11    |
| 6  | 597.29  | 299.15 | 579.28  | 290.14 | D   | 1044.56 | 522.78 | 1027.53 | 514.27 | 1026.55 | 513.78 | 10    |
| 7  | 710.37  | 355.69 | 692.36  | 346.68 | I   | 929.53  | 465.27 | 912.5   | 456.76 | 911.52  | 456.26 | 9     |
| 8  | 809.44  | 405.22 | 791.43  | 396.22 | V   | 816.45  | 408.73 | 799.42  | 400.21 | 798.44  | 399.72 | 8     |
| 9  | 938.48  | 469.75 | 920.47  | 460.74 | E   | 717.38  | 359.19 | 700.35  | 350.68 | 699.37  | 350.19 | 7     |
| 10 | 1037.55 | 519.28 | 1019.54 | 510.27 | V   | 588.34  | 294.67 | 571.31  | 286.16 | 570.32  | 285.67 | 6     |
| 11 | 1108.59 | 554.8  | 1090.58 | 545.79 | A   | 489.27  | 245.14 | 472.24  | 236.62 | 471.26  | 236.13 | 5     |
| 12 | 1207.66 | 604.33 | 1189.65 | 595.33 | V   | 418.23  | 209.62 | 401.2   | 201.11 | 400.22  | 200.61 | 4     |
| 13 | 1264.68 | 632.84 | 1246.67 | 623.84 | G   | 319.16  | 160.08 | 302.13  | 151.57 | 301.15  | 151.08 | 3     |
| 14 | 1379.71 | 690.36 | 1361.69 | 681.35 | D   | 262.14  | 131.57 | 245.11  | 123.06 | 244.13  | 122.57 | 2     |
| 15 |         |        |         |        | K   | 147.11  | 74.06  | 130.09  | 65.55  |         |        | 1     |

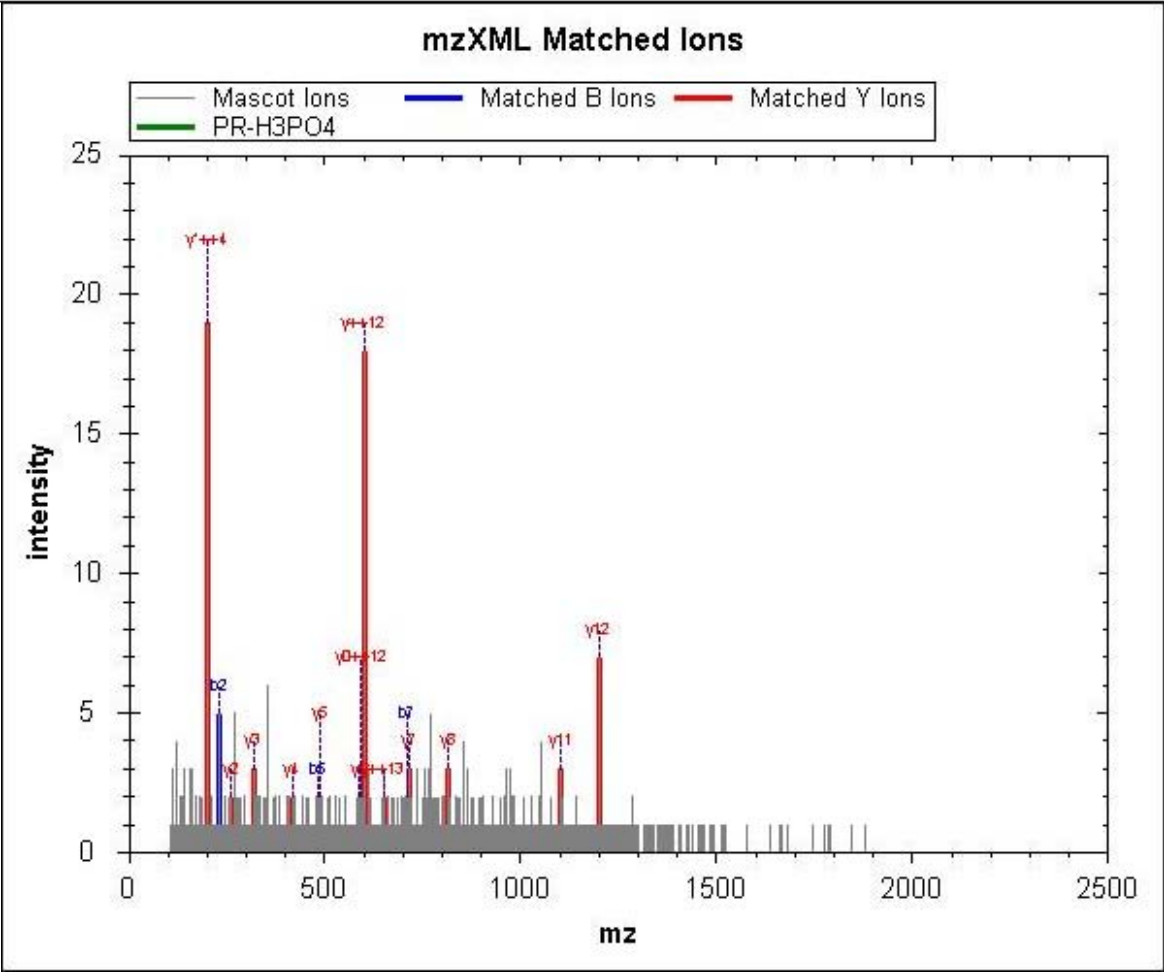

Protein index=1288, ACC No: IPI00183294

Peptide index=6713 MS/MS spectrum

Sequence: LGELLFPSSLAGETLGFSGLR, m/z:1126.102, charge:+ 2, Modification: , Mod Position:

Score: 38.56, Raw data:WET\_B1\_090616\_02.mzxml, MS/MS Elution time: 94.67266, Scan number:5303, Mass delta:-0.0007, Rank:1

| No | b       | b++    | b0      | b0++   | Seq | y       | y++     | y*      | y*++    | y0      | y0++    | RevNo |
|----|---------|--------|---------|--------|-----|---------|---------|---------|---------|---------|---------|-------|
| 1  | 114.09  | 57.55  |         |        | L   |         |         |         |         |         |         | 22    |
| 2  | 171.11  | 86.06  |         |        | G   | 2138.11 | 1069.56 | 2121.09 | 1061.05 | 2120.1  | 1060.55 | 21    |
| 3  | 300.16  | 150.58 | 282.14  | 141.58 | E   | 2081.09 | 1041.05 | 2064.06 | 1032.54 | 2063.08 | 1032.04 | 20    |
| 4  | 413.24  | 207.12 | 395.23  | 198.12 | L   | 1952.05 | 976.53  | 1935.02 | 968.01  | 1934.04 | 967.52  | 19    |
| 5  | 526.32  | 263.67 | 508.31  | 254.66 | L   | 1838.96 | 919.99  | 1821.94 | 911.47  | 1820.95 | 910.98  | 18    |
| 6  | 673.39  | 337.2  | 655.38  | 328.19 | F   | 1725.88 | 863.44  | 1708.85 | 854.93  | 1707.87 | 854.44  | 17    |
| 7  | 770.44  | 385.73 | 752.43  | 376.72 | P   | 1578.81 | 789.91  | 1561.79 | 781.4   | 1560.8  | 780.9   | 16    |
| 8  | 857.48  | 429.24 | 839.47  | 420.24 | S   | 1481.76 | 741.38  | 1464.73 | 732.87  | 1463.75 | 732.38  | 15    |
| 9  | 944.51  | 472.76 | 926.5   | 463.75 | S   | 1394.73 | 697.87  | 1377.7  | 689.35  | 1376.72 | 688.86  | 14    |
| 10 | 1057.59 | 529.3  | 1039.58 | 520.29 | L   | 1307.7  | 654.35  | 1290.67 | 645.84  | 1289.68 | 645.35  | 13    |
| 11 | 1128.63 | 564.82 | 1110.62 | 555.81 | A   | 1194.61 | 597.81  | 1177.58 | 589.3   | 1176.6  | 588.8   | 12    |
| 12 | 1185.65 | 593.33 | 1167.64 | 584.32 | G   | 1123.57 | 562.29  | 1106.55 | 553.78  | 1105.56 | 553.29  | 11    |





Protein index=1290, ACC No: IPI00019996

Peptide index=829 MS/MS spectrum

Sequence: TVIIHDRPDITHPR, m/z:557.3046, charge:+ 3, Modification: , Mod Position:

Score: 32.44, Raw data:WET\_B1\_090616\_02.mzxml, MS/MS Elution time: 25.62883, Scan number:1260, Mass delta:-0.0141, Rank:1

| No | b       | b++    | b*      | b*++   | b0      | b0++   | Seq | y       | y++    | y*      | y*++   | y0      | y0++   | RevNo |
|----|---------|--------|---------|--------|---------|--------|-----|---------|--------|---------|--------|---------|--------|-------|
| 1  | 102.05  | 51.53  |         |        | 84.04   | 42.53  | T   |         |        |         |        |         |        | 14    |
| 2  | 201.12  | 101.07 |         |        | 183.11  | 92.06  | V   | 1568.87 | 784.94 | 1551.84 | 776.42 | 1550.85 | 775.93 | 13    |
| 3  | 314.21  | 157.61 |         |        | 296.2   | 148.6  | I   | 1469.8  | 735.4  | 1452.77 | 726.89 | 1451.79 | 726.4  | 12    |
| 4  | 427.29  | 214.15 |         |        | 409.28  | 205.14 | I   | 1356.71 | 678.86 | 1339.69 | 670.35 | 1338.7  | 669.85 | 11    |
| 5  | 564.35  | 282.68 |         |        | 546.34  | 273.67 | H   | 1243.63 | 622.32 | 1226.6  | 613.8  | 1225.62 | 613.31 | 10    |
| 6  | 679.38  | 340.19 |         |        | 661.37  | 331.19 | D   | 1106.57 | 553.79 | 1089.54 | 545.28 | 1088.56 | 544.78 | 9     |
| 7  | 835.48  | 418.24 | 818.45  | 409.73 | 817.47  | 409.24 | R   | 991.54  | 496.28 | 974.52  | 487.76 | 973.53  | 487.27 | 8     |
| 8  | 932.53  | 466.77 | 915.5   | 458.26 | 914.52  | 457.76 | P   | 835.44  | 418.22 | 818.42  | 409.71 | 817.43  | 409.22 | 7     |
| 9  | 1047.56 | 524.28 | 1030.53 | 515.77 | 1029.55 | 515.28 | D   | 738.39  | 369.7  | 721.36  | 361.18 | 720.38  | 360.69 | 6     |
| 10 | 1160.64 | 580.82 | 1143.62 | 572.31 | 1142.63 | 571.82 | I   | 623.36  | 312.18 | 606.34  | 303.67 | 605.35  | 303.18 | 5     |
| 11 | 1261.69 | 631.35 | 1244.66 | 622.84 | 1243.68 | 622.34 | T   | 510.28  | 255.64 | 493.25  | 247.13 | 492.27  | 246.64 | 4     |
| 12 | 1398.75 | 699.88 | 1381.72 | 691.36 | 1380.74 | 690.87 | H   | 409.23  | 205.12 | 392.2   | 196.61 |         |        | 3     |
| 13 | 1495.8  | 748.4  | 1478.78 | 739.89 | 1477.79 | 739.4  | P   | 272.17  | 136.59 | 255.15  | 128.08 |         |        | 2     |
| 14 |         |        |         |        |         |        | R   | 175.12  | 88.06  | 158.09  | 79.55  |         |        | 1     |

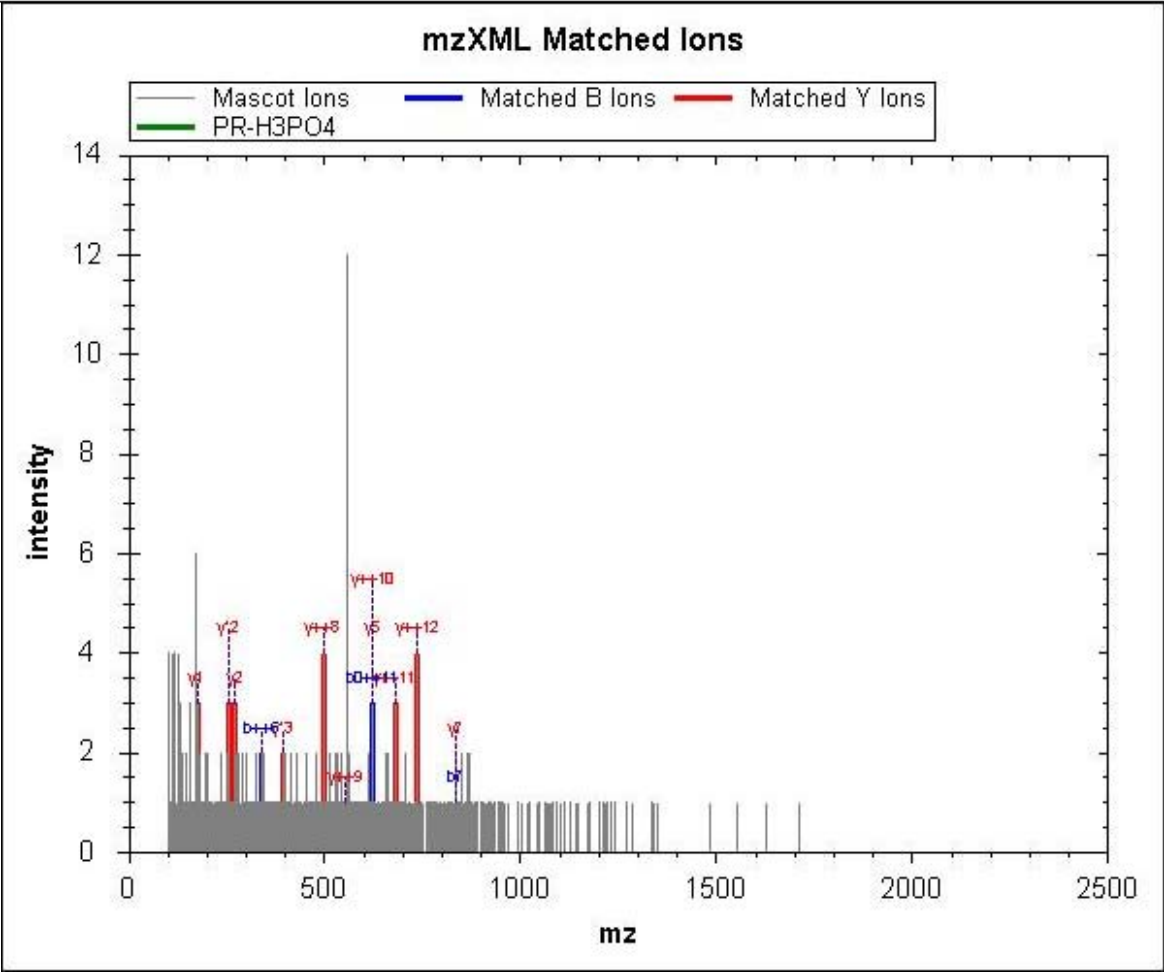

Protein index=1291, ACC No: IPI00001382

Peptide index=2960 MS/MS spectrum

Sequence: FQDVSFAYPNRPDRPVLK, m/z: 717.0403, charge: + 3, Modification: , Mod Position:

Score: 38.02, Raw data: WET\_B1\_090616\_03.mzxml, MS/MS Elution time: 48.722, Scan number: 2613, Mass delta: -0.0126, Rank: 1

| No | b       | b++    | b*      | b*++   | b0      | b0++   | Seq | y       | y++     | y*      | y*++   | y0      | y0++   | RevNo |
|----|---------|--------|---------|--------|---------|--------|-----|---------|---------|---------|--------|---------|--------|-------|
| 1  | 148.08  | 74.54  |         |        |         |        | F   |         |         |         |        |         |        | 18    |
| 2  | 276.13  | 138.57 | 259.11  | 130.06 |         |        | Q   | 2002.05 | 1001.53 | 1985.02 | 993.02 | 1984.04 | 992.52 | 17    |
| 3  | 391.16  | 196.08 | 374.13  | 187.57 | 373.15  | 187.08 | D   | 1873.99 | 937.5   | 1856.97 | 928.99 | 1855.98 | 928.49 | 16    |
| 4  | 490.23  | 245.62 | 473.2   | 237.11 | 472.22  | 236.61 | V   | 1758.96 | 879.99  | 1741.94 | 871.47 | 1740.95 | 870.98 | 15    |
| 5  | 577.26  | 289.13 | 560.24  | 280.62 | 559.25  | 280.13 | S   | 1659.9  | 830.45  | 1642.87 | 821.94 | 1641.89 | 821.45 | 14    |
| 6  | 724.33  | 362.67 | 707.3   | 354.16 | 706.32  | 353.66 | F   | 1572.86 | 786.94  | 1555.84 | 778.42 | 1554.85 | 777.93 | 13    |
| 7  | 795.37  | 398.19 | 778.34  | 389.67 | 777.36  | 389.18 | A   | 1425.8  | 713.4   | 1408.77 | 704.89 | 1407.79 | 704.4  | 12    |
| 8  | 958.43  | 479.72 | 941.4   | 471.21 | 940.42  | 470.71 | Y   | 1354.76 | 677.88  | 1337.73 | 669.37 | 1336.75 | 668.88 | 11    |
| 9  | 1055.48 | 528.25 | 1038.46 | 519.73 | 1037.47 | 519.24 | P   | 1191.7  | 596.35  | 1174.67 | 587.84 | 1173.68 | 587.35 | 10    |
| 10 | 1169.53 | 585.27 | 1152.5  | 576.75 | 1151.52 | 576.26 | N   | 1094.64 | 547.83  | 1077.62 | 539.31 | 1076.63 | 538.82 | 9     |
| 11 | 1325.63 | 663.32 | 1308.6  | 654.8  | 1307.62 | 654.31 | R   | 980.6   | 490.8   | 963.57  | 482.29 | 962.59  | 481.8  | 8     |
| 12 | 1422.68 | 711.84 | 1405.65 | 703.33 | 1404.67 | 702.84 | P   | 824.5   | 412.75  | 807.47  | 404.24 | 806.49  | 403.75 | 7     |

|    |         |         |         |        |         |        |   |        |        |        |        |        |        |   |
|----|---------|---------|---------|--------|---------|--------|---|--------|--------|--------|--------|--------|--------|---|
| 13 | 1537.71 | 769.36  | 1520.68 | 760.84 | 1519.7  | 760.35 | D | 727.45 | 364.23 | 710.42 | 355.71 | 709.44 | 355.22 | 6 |
| 14 | 1693.81 | 847.41  | 1676.78 | 838.89 | 1675.8  | 838.4  | R | 612.42 | 306.71 | 595.39 | 298.2  |        |        | 5 |
| 15 | 1790.86 | 895.93  | 1773.83 | 887.42 | 1772.85 | 886.93 | P | 456.32 | 228.66 | 439.29 | 220.15 |        |        | 4 |
| 16 | 1889.93 | 945.47  | 1872.9  | 936.96 | 1871.92 | 936.46 | V | 359.27 | 180.14 | 342.24 | 171.62 |        |        | 3 |
| 17 | 2003.01 | 1002.01 | 1985.99 | 993.5  | 1985    | 993.01 | L | 260.2  | 130.6  | 243.17 | 122.09 |        |        | 2 |
| 18 |         |         |         |        |         |        | K | 147.11 | 74.06  | 130.09 | 65.55  |        |        | 1 |

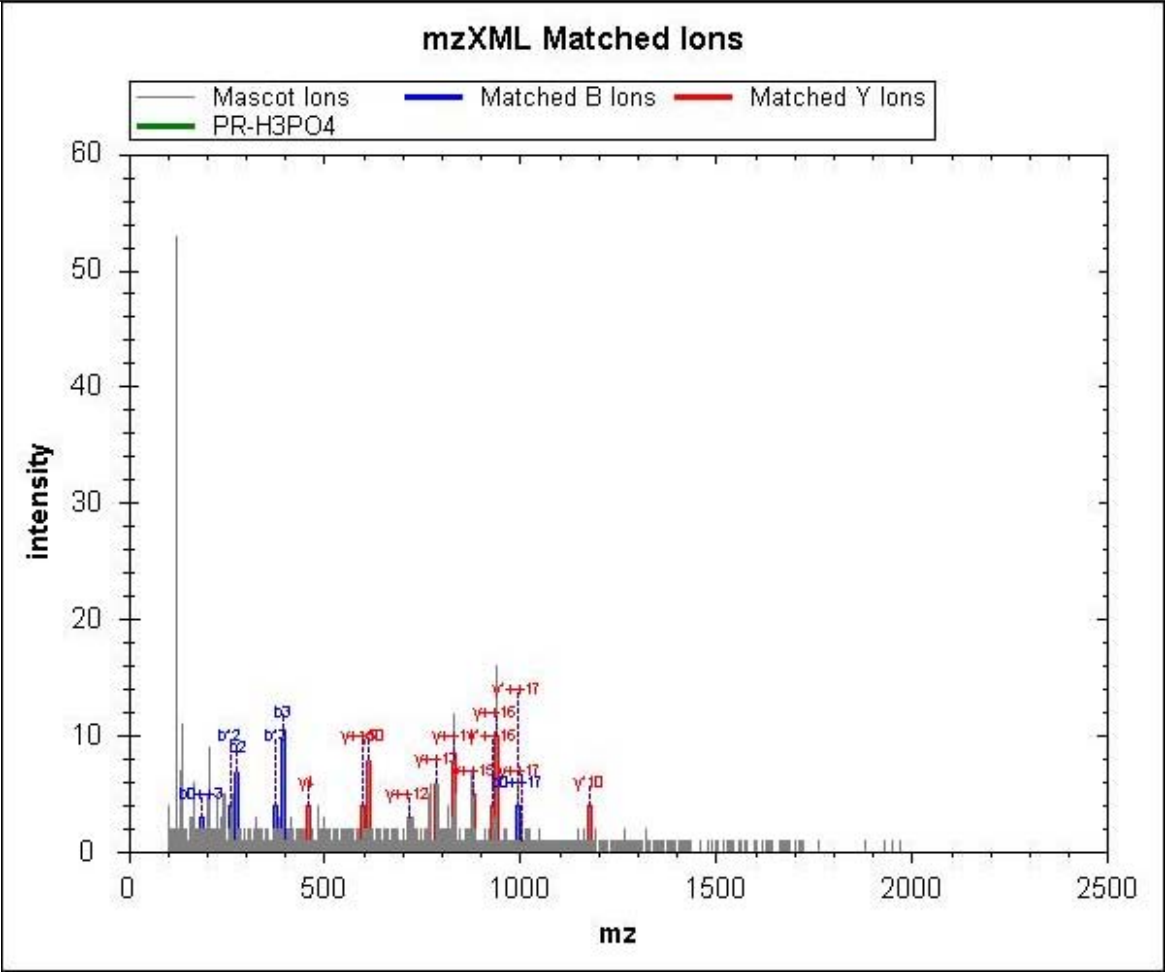

Protein index=1292, ACC No:IPI00374076

Peptide index=7166 MS/MS spectrum

Sequence: YLPWALVASMLAGSLLK, m/z:925.0273, charge:+ 2, Modification: Oxidation (M), Mod Position: 0.00000000010000000.0

Score: 32.69, Raw data:WET\_B1\_090616\_03.mzxml, MS/MS Elution time: 109.821, Scan number:6250, Mass delta:0.0181, Rank:1

| No | b      | b++    | b0 | b0++ | Seq | y       | y++    | y*      | y*++   | y0      | y0++   | RevNo |
|----|--------|--------|----|------|-----|---------|--------|---------|--------|---------|--------|-------|
| 1  | 164.07 | 82.54  |    |      | Y   |         |        |         |        |         |        | 17    |
| 2  | 277.15 | 139.08 |    |      | L   | 1685.97 | 843.49 | 1668.94 | 834.97 | 1667.96 | 834.48 | 16    |
| 3  | 374.21 | 187.61 |    |      | P   | 1572.88 | 786.94 | 1555.86 | 778.43 | 1554.87 | 777.94 | 15    |
| 4  | 560.29 | 280.65 |    |      | W   | 1475.83 | 738.42 | 1458.8  | 729.9  | 1457.82 | 729.41 | 14    |
| 5  | 631.32 | 316.17 |    |      | A   | 1289.75 | 645.38 | 1272.72 | 636.87 | 1271.74 | 636.37 | 13    |

|    |         |        |         |        |   |         |        |         |        |         |        |    |
|----|---------|--------|---------|--------|---|---------|--------|---------|--------|---------|--------|----|
| 6  | 744.41  | 372.71 |         |        | L | 1218.71 | 609.86 | 1201.69 | 601.35 | 1200.7  | 600.85 | 12 |
| 7  | 843.48  | 422.24 |         |        | V | 1105.63 | 553.32 | 1088.6  | 544.8  | 1087.62 | 544.31 | 11 |
| 8  | 914.51  | 457.76 |         |        | A | 1006.56 | 503.78 | 989.53  | 495.27 | 988.55  | 494.78 | 10 |
| 9  | 1001.55 | 501.28 | 983.53  | 492.27 | S | 935.52  | 468.27 | 918.5   | 459.75 | 917.51  | 459.26 | 9  |
| 10 | 1148.58 | 574.79 | 1130.57 | 565.79 | M | 848.49  | 424.75 | 831.46  | 416.24 | 830.48  | 415.74 | 8  |
| 11 | 1261.67 | 631.34 | 1243.65 | 622.33 | L | 701.46  | 351.23 | 684.43  | 342.72 | 683.45  | 342.23 | 7  |
| 12 | 1332.7  | 666.85 | 1314.69 | 657.85 | A | 588.37  | 294.69 | 571.34  | 286.18 | 570.36  | 285.68 | 6  |
| 13 | 1389.72 | 695.37 | 1371.71 | 686.36 | G | 517.33  | 259.17 | 500.31  | 250.66 | 499.32  | 250.17 | 5  |
| 14 | 1476.76 | 738.88 | 1458.74 | 729.88 | S | 460.31  | 230.66 | 443.29  | 222.15 | 442.3   | 221.65 | 4  |
| 15 | 1589.84 | 795.42 | 1571.83 | 786.42 | L | 373.28  | 187.14 | 356.25  | 178.63 |         |        | 3  |
| 16 | 1702.92 | 851.97 | 1684.91 | 842.96 | L | 260.2   | 130.6  | 243.17  | 122.09 |         |        | 2  |
| 17 |         |        |         |        | K | 147.11  | 74.06  | 130.09  | 65.55  |         |        | 1  |

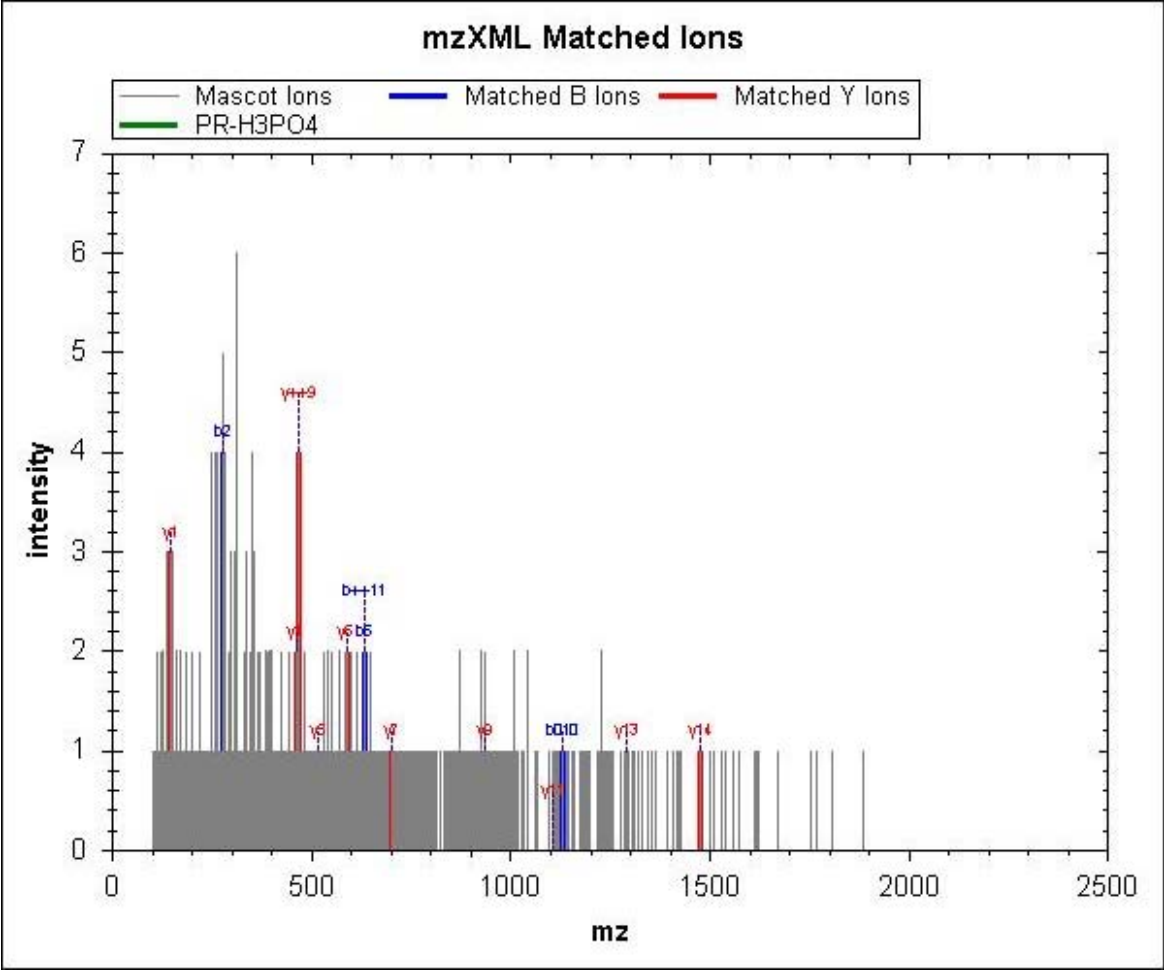

Protein index=1293, ACC No: IPI00002225

Peptide index=7178 MS/MS spectrum

Sequence: VYPHPQDLLAALPLALVLLAMR, m/z:810.8043, charge:+ 3, Modification: Oxidation (M), Mod Position: 0.0000000000000000000010.0

Score: 37.87, Raw data:WET\_B1\_090616\_03.mzxml, MS/MS Elution time: 110.3742, Scan number:6288, Mass delta:0.0044, Rank:1

| No | b       | b++     | b*      | b*++    | b0      | b0++    | Seq | y       | y++     | y*      | y*++    | y0      | y0++    | RevNo |
|----|---------|---------|---------|---------|---------|---------|-----|---------|---------|---------|---------|---------|---------|-------|
| 1  | 100.08  | 50.54   |         |         |         |         | V   |         |         |         |         |         |         | 22    |
| 2  | 263.14  | 132.07  |         |         |         |         | Y   | 2267.33 | 1134.17 | 2250.3  | 1125.65 | 2249.32 | 1125.16 | 21    |
| 3  | 360.19  | 180.6   |         |         |         |         | P   | 2104.26 | 1052.64 | 2087.24 | 1044.12 | 2086.25 | 1043.63 | 20    |
| 4  | 497.25  | 249.13  |         |         |         |         | H   | 2007.21 | 1004.11 | 1990.18 | 995.6   | 1989.2  | 995.1   | 19    |
| 5  | 594.3   | 297.66  |         |         |         |         | P   | 1870.15 | 935.58  | 1853.13 | 927.07  | 1852.14 | 926.57  | 18    |
| 6  | 722.36  | 361.68  | 705.34  | 353.17  |         |         | Q   | 1773.1  | 887.05  | 1756.07 | 878.54  | 1755.09 | 878.05  | 17    |
| 7  | 837.39  | 419.2   | 820.36  | 410.68  | 819.38  | 410.19  | D   | 1645.04 | 823.02  | 1628.01 | 814.51  | 1627.03 | 814.02  | 16    |
| 8  | 950.47  | 475.74  | 933.45  | 467.23  | 932.46  | 466.73  | L   | 1530.01 | 765.51  | 1512.99 | 757     |         |         | 15    |
| 9  | 1063.56 | 532.28  | 1046.53 | 523.77  | 1045.55 | 523.28  | L   | 1416.93 | 708.97  | 1399.9  | 700.46  |         |         | 14    |
| 10 | 1134.59 | 567.8   | 1117.57 | 559.29  | 1116.58 | 558.8   | A   | 1303.85 | 652.43  | 1286.82 | 643.91  |         |         | 13    |
| 11 | 1205.63 | 603.32  | 1188.6  | 594.81  | 1187.62 | 594.31  | A   | 1232.81 | 616.91  | 1215.78 | 608.39  |         |         | 12    |
| 12 | 1318.72 | 659.86  | 1301.69 | 651.35  | 1300.7  | 650.86  | L   | 1161.77 | 581.39  | 1144.75 | 572.88  |         |         | 11    |
| 13 | 1415.77 | 708.39  | 1398.74 | 699.87  | 1397.76 | 699.38  | P   | 1048.69 | 524.85  | 1031.66 | 516.33  |         |         | 10    |
| 14 | 1528.85 | 764.93  | 1511.83 | 756.42  | 1510.84 | 755.92  | L   | 951.63  | 476.32  | 934.61  | 467.81  |         |         | 9     |
| 15 | 1599.89 | 800.45  | 1582.86 | 791.94  | 1581.88 | 791.44  | A   | 838.55  | 419.78  | 821.52  | 411.27  |         |         | 8     |
| 16 | 1712.97 | 856.99  | 1695.95 | 848.48  | 1694.96 | 847.99  | L   | 767.51  | 384.26  | 750.49  | 375.75  |         |         | 7     |
| 17 | 1812.04 | 906.52  | 1795.02 | 898.01  | 1794.03 | 897.52  | V   | 654.43  | 327.72  | 637.4   | 319.21  |         |         | 6     |
| 18 | 1925.13 | 963.07  | 1908.1  | 954.55  | 1907.12 | 954.06  | L   | 555.36  | 278.18  | 538.33  | 269.67  |         |         | 5     |
| 19 | 2038.21 | 1019.61 | 2021.18 | 1011.1  | 2020.2  | 1010.6  | L   | 442.28  | 221.64  | 425.25  | 213.13  |         |         | 4     |
| 20 | 2109.25 | 1055.13 | 2092.22 | 1046.61 | 2091.24 | 1046.12 | A   | 329.19  | 165.1   | 312.17  | 156.59  |         |         | 3     |
| 21 | 2192.28 | 1096.65 | 2175.26 | 1088.13 | 2174.27 | 1087.64 | M   | 258.16  | 129.58  | 241.13  | 121.07  |         |         | 2     |
| 22 |         |         |         |         |         |         | R   | 175.12  | 88.06   | 158.09  | 79.55   |         |         | 1     |

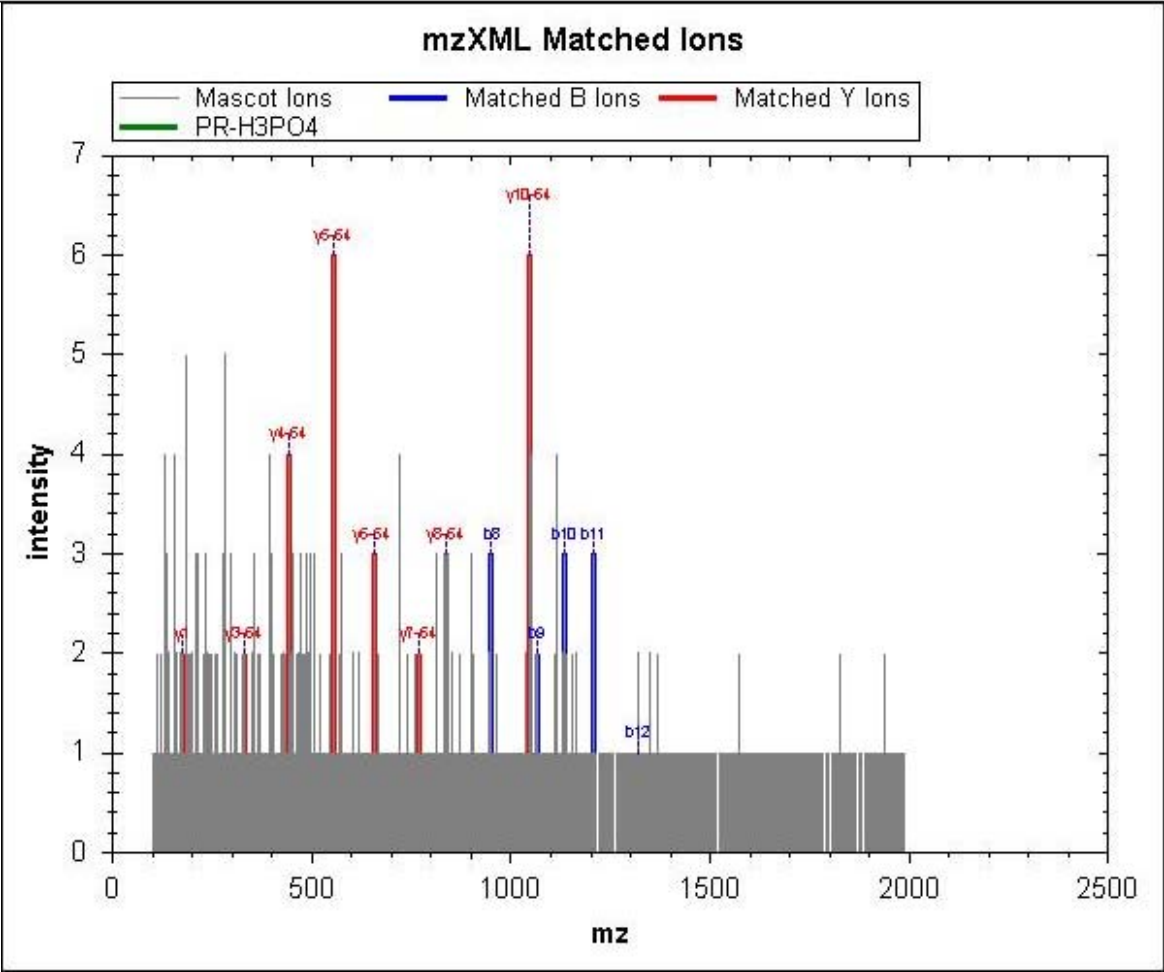

Protein index=1294, ACC No:IPI00005648

Peptide index=383 MS/MS spectrum

Sequence: LEAFHER, m/z:451.2309, charge:+ 2, Modification: , Mod Position:

Score: 34.98, Raw data:WET\_B1\_090616\_03.mzxml, MS/MS Elution time: 18.843, Scan number:863, Mass delta:0.002, Rank:1

| No | b      | b++    | b0     | b0++   | Seq | y      | y++    | y*     | y*++   | y0     | y0++   | RevNo |
|----|--------|--------|--------|--------|-----|--------|--------|--------|--------|--------|--------|-------|
| 1  | 114.09 | 57.55  |        |        | L   |        |        |        |        |        |        | 7     |
| 2  | 243.13 | 122.07 | 225.12 | 113.07 | E   | 788.37 | 394.69 | 771.34 | 386.17 | 770.36 | 385.68 | 6     |
| 3  | 314.17 | 157.59 | 296.16 | 148.58 | A   | 659.33 | 330.17 | 642.3  | 321.65 | 641.32 | 321.16 | 5     |
| 4  | 461.24 | 231.12 | 443.23 | 222.12 | F   | 588.29 | 294.65 | 571.26 | 286.13 | 570.28 | 285.64 | 4     |
| 5  | 598.3  | 299.65 | 580.29 | 290.65 | H   | 441.22 | 221.11 | 424.19 | 212.6  | 423.21 | 212.11 | 3     |
| 6  | 727.34 | 364.17 | 709.33 | 355.17 | E   | 304.16 | 152.58 | 287.13 | 144.07 | 286.15 | 143.58 | 2     |
| 7  |        |        |        |        | R   | 175.12 | 88.06  | 158.09 | 79.55  |        |        | 1     |

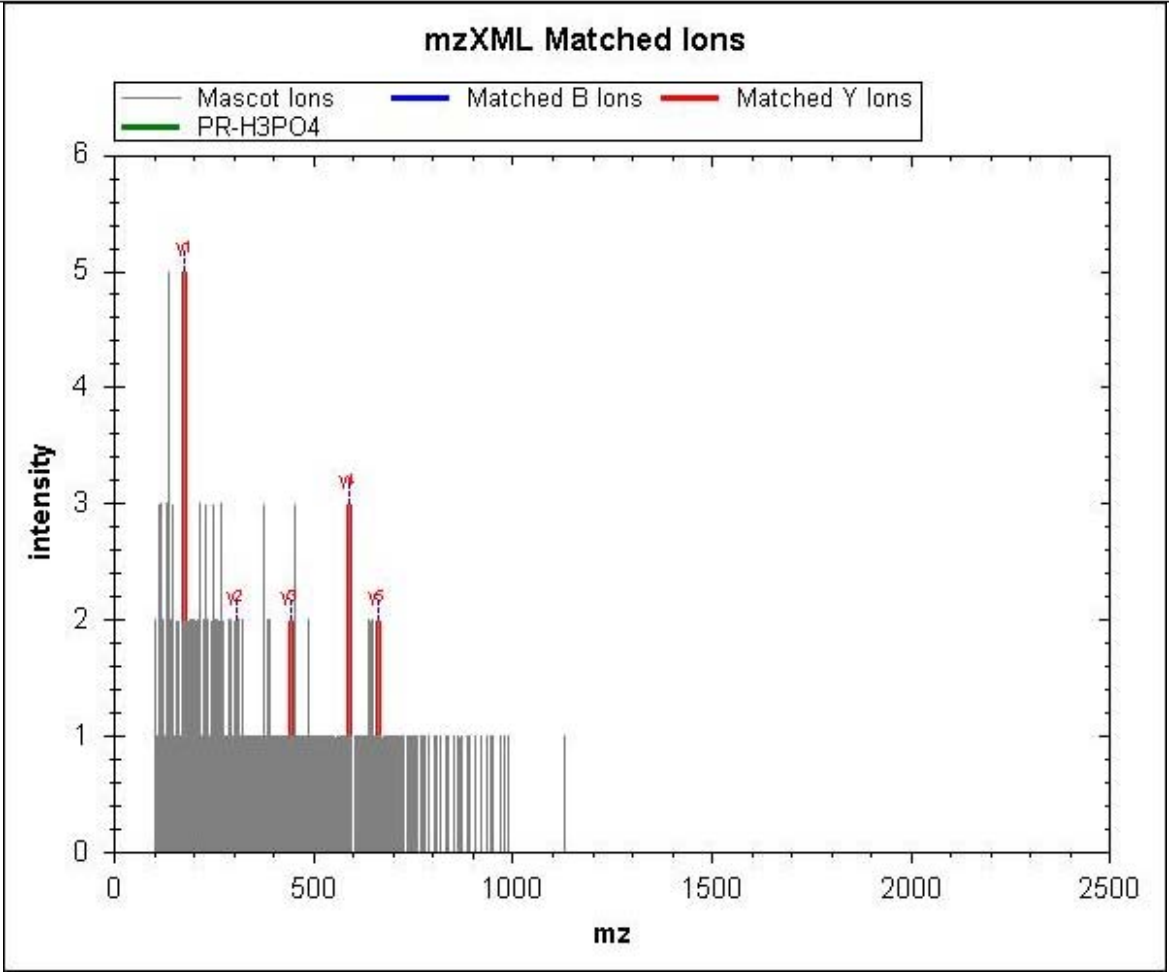

Protein index=1295, ACC No: IPI00166555

Peptide index=1377 MS/MS spectrum

Sequence: AISSTEAVLNNR, m/z:637.8336, charge:+ 2, Modification: , Mod Position:

Score: 50.1, Raw data:WET\_B1\_090616\_03.mzxml, MS/MS Elution time: 32.517, Scan number:1664, Mass delta:-0.0099, Rank:1

| No | b       | b++    | b*      | b*++   | b0      | b0++   | Seq | y       | y++    | y*      | y*++   | y0      | y0++   | RevNo |
|----|---------|--------|---------|--------|---------|--------|-----|---------|--------|---------|--------|---------|--------|-------|
| 1  | 72.04   | 36.53  |         |        |         |        | A   |         |        |         |        |         |        | 12    |
| 2  | 185.13  | 93.07  |         |        |         |        | I   | 1203.63 | 602.32 | 1186.61 | 593.81 | 1185.62 | 593.31 | 11    |
| 3  | 272.16  | 136.58 |         |        | 254.15  | 127.58 | S   | 1090.55 | 545.78 | 1073.52 | 537.26 | 1072.54 | 536.77 | 10    |
| 4  | 359.19  | 180.1  |         |        | 341.18  | 171.09 | S   | 1003.52 | 502.26 | 986.49  | 493.75 | 985.51  | 493.26 | 9     |
| 5  | 460.24  | 230.62 |         |        | 442.23  | 221.62 | T   | 916.48  | 458.75 | 899.46  | 450.23 | 898.47  | 449.74 | 8     |
| 6  | 589.28  | 295.15 |         |        | 571.27  | 286.14 | E   | 815.44  | 408.22 | 798.41  | 399.71 | 797.43  | 399.22 | 7     |
| 7  | 660.32  | 330.66 |         |        | 642.31  | 321.66 | A   | 686.39  | 343.7  | 669.37  | 335.19 |         |        | 6     |
| 8  | 759.39  | 380.2  |         |        | 741.38  | 371.19 | V   | 615.36  | 308.18 | 598.33  | 299.67 |         |        | 5     |
| 9  | 872.47  | 436.74 |         |        | 854.46  | 427.73 | L   | 516.29  | 258.65 | 499.26  | 250.13 |         |        | 4     |
| 10 | 986.52  | 493.76 | 969.49  | 485.25 | 968.5   | 484.76 | N   | 403.2   | 202.11 | 386.18  | 193.59 |         |        | 3     |
| 11 | 1100.56 | 550.78 | 1083.53 | 542.27 | 1082.55 | 541.78 | N   | 289.16  | 145.08 | 272.14  | 136.57 |         |        | 2     |
| 12 |         |        |         |        |         |        | R   | 175.12  | 88.06  | 158.09  | 79.55  |         |        | 1     |

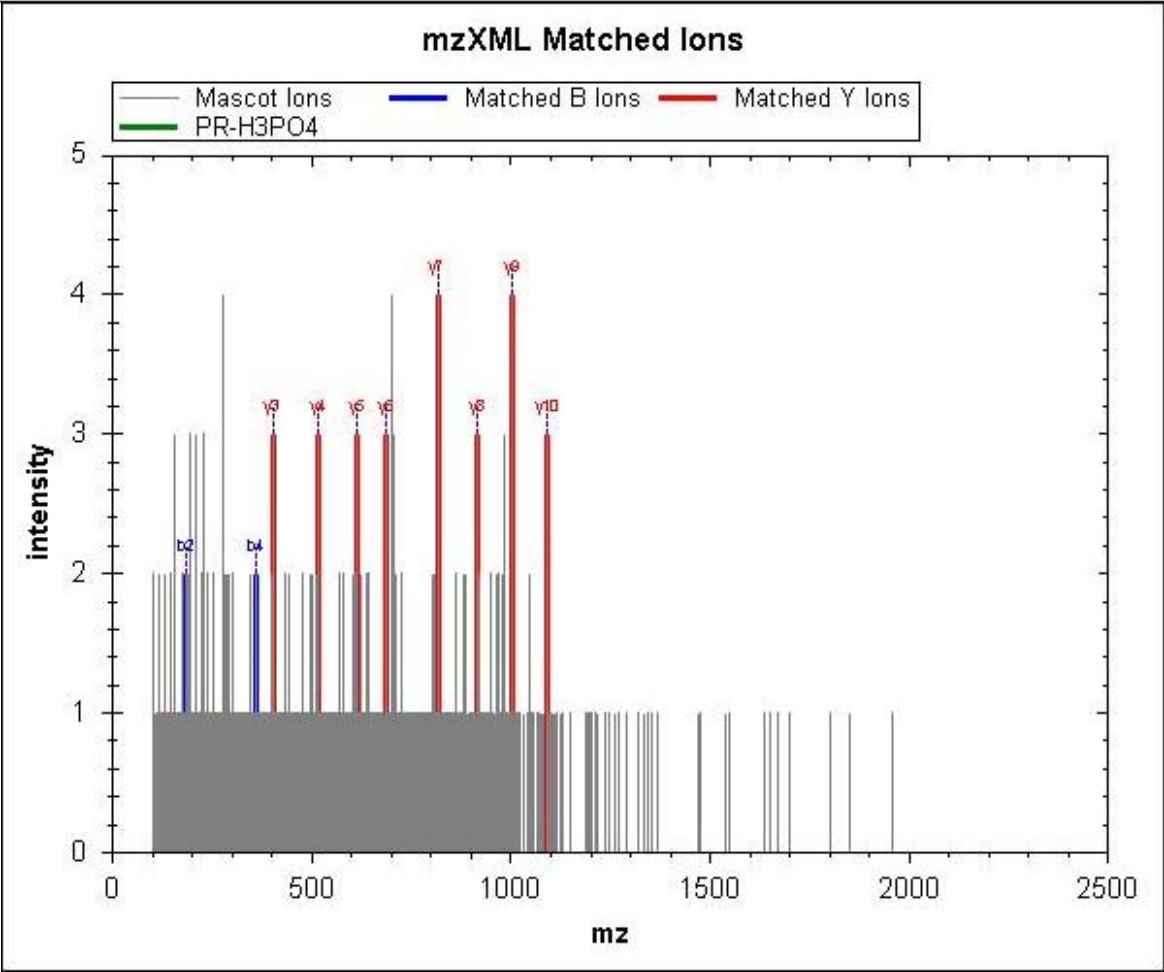

Protein index=1296, ACC No: IPI00023500

Peptide index=6361 MS/MS spectrum

Sequence: SLSFLGTFILK, m/z: 613.3621, charge: + 2, Modification: , Mod Position:

Score: 42.69, Raw data: WET\_B1\_090616\_03.mzxml, MS/MS Elution time: 86.92767, Scan number: 4850, Mass delta: -0.0021, Rank: 1

| No | b       | b++    | b0     | b0++   | Seq | y       | y++    | y*      | y*++   | y0      | y0++   | RevNo |
|----|---------|--------|--------|--------|-----|---------|--------|---------|--------|---------|--------|-------|
| 1  | 88.04   | 44.52  | 70.03  | 35.52  | S   |         |        |         |        |         |        | 11    |
| 2  | 201.12  | 101.07 | 183.11 | 92.06  | L   | 1138.69 | 569.85 | 1121.66 | 561.33 | 1120.68 | 560.84 | 10    |
| 3  | 288.16  | 144.58 | 270.14 | 135.58 | S   | 1025.6  | 513.31 | 1008.58 | 504.79 | 1007.59 | 504.3  | 9     |
| 4  | 435.22  | 218.12 | 417.21 | 209.11 | F   | 938.57  | 469.79 | 921.54  | 461.28 | 920.56  | 460.78 | 8     |
| 5  | 548.31  | 274.66 | 530.3  | 265.65 | L   | 791.5   | 396.25 | 774.48  | 387.74 | 773.49  | 387.25 | 7     |
| 6  | 605.33  | 303.17 | 587.32 | 294.16 | G   | 678.42  | 339.71 | 661.39  | 331.2  | 660.41  | 330.71 | 6     |
| 7  | 706.38  | 353.69 | 688.37 | 344.69 | T   | 621.4   | 311.2  | 604.37  | 302.69 | 603.39  | 302.2  | 5     |
| 8  | 853.45  | 427.23 | 835.43 | 418.22 | F   | 520.35  | 260.68 | 503.32  | 252.17 |         |        | 4     |
| 9  | 966.53  | 483.77 | 948.52 | 474.76 | I   | 373.28  | 187.14 | 356.25  | 178.63 |         |        | 3     |
| 10 | 1079.61 | 540.31 | 1061.6 | 531.31 | L   | 260.2   | 130.6  | 243.17  | 122.09 |         |        | 2     |
| 11 |         |        |        |        | K   | 147.11  | 74.06  | 130.09  | 65.55  |         |        | 1     |

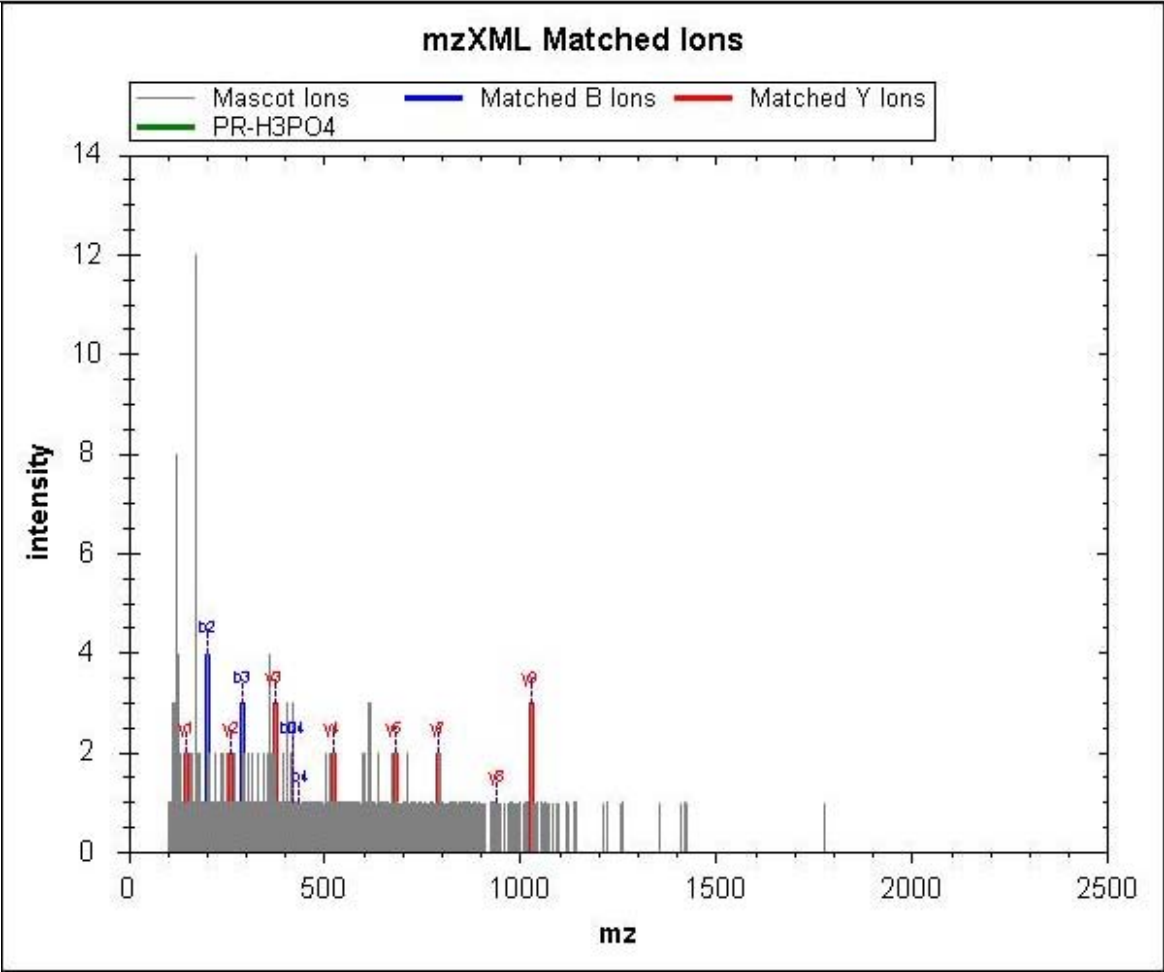

Protein index=1298, ACC No:IPI00171925

Peptide index=6252 MS/MS spectrum

Sequence: LALIGGLEGFLSK, m/z:659.4, charge:+ 2, Modification: , Mod Position:

Score: 67.91, Raw data:WET\_B2\_090616\_03.mzxml, MS/MS Elution time: 84.77917, Scan number:4690, Mass delta:0.0083, Rank:1

| No | b       | b++    | b0      | b0++   | Seq | y       | y++    | y*      | y*++   | y0      | y0++   | RevNo |
|----|---------|--------|---------|--------|-----|---------|--------|---------|--------|---------|--------|-------|
| 1  | 114.09  | 57.55  |         |        | L   |         |        |         |        |         |        | 13    |
| 2  | 185.13  | 93.07  |         |        | A   | 1204.69 | 602.85 | 1187.67 | 594.34 | 1186.68 | 593.85 | 12    |
| 3  | 298.21  | 149.61 |         |        | L   | 1133.66 | 567.33 | 1116.63 | 558.82 | 1115.65 | 558.33 | 11    |
| 4  | 411.3   | 206.15 |         |        | I   | 1020.57 | 510.79 | 1003.55 | 502.28 | 1002.56 | 501.78 | 10    |
| 5  | 468.32  | 234.66 |         |        | G   | 907.49  | 454.25 | 890.46  | 445.73 | 889.48  | 445.24 | 9     |
| 6  | 525.34  | 263.17 |         |        | G   | 850.47  | 425.74 | 833.44  | 417.22 | 832.46  | 416.73 | 8     |
| 7  | 638.42  | 319.72 |         |        | L   | 793.45  | 397.23 | 776.42  | 388.71 | 775.43  | 388.22 | 7     |
| 8  | 767.47  | 384.24 | 749.46  | 375.23 | E   | 680.36  | 340.68 | 663.33  | 332.17 | 662.35  | 331.68 | 6     |
| 9  | 824.49  | 412.75 | 806.48  | 403.74 | G   | 551.32  | 276.16 | 534.29  | 267.65 | 533.31  | 267.16 | 5     |
| 10 | 971.56  | 486.28 | 953.55  | 477.28 | F   | 494.3   | 247.65 | 477.27  | 239.14 | 476.29  | 238.65 | 4     |
| 11 | 1084.64 | 542.82 | 1066.63 | 533.82 | L   | 347.23  | 174.12 | 330.2   | 165.6  | 329.22  | 165.11 | 3     |
| 12 | 1171.67 | 586.34 | 1153.66 | 577.33 | S   | 234.14  | 117.58 | 217.12  | 109.06 | 216.13  | 108.57 | 2     |

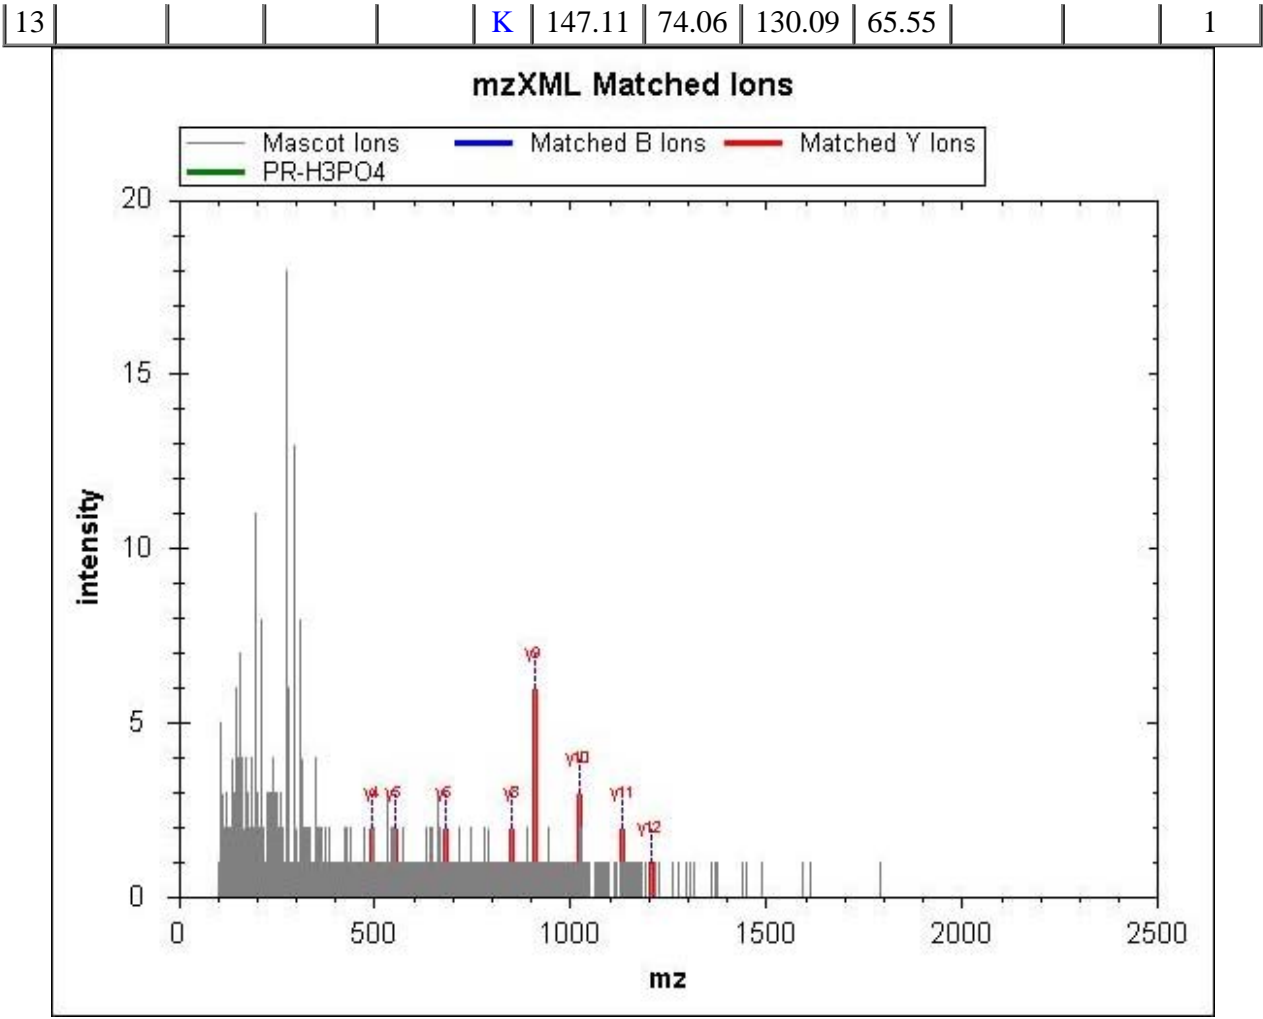

Protein index=1299, ACC No:IP100151710

Peptide index=2460 MS/MS spectrum

Sequence: KQPLDLIR, m/z:491.804, charge:+ 2, Modification: , Mod Position:

Score: 36.11, Raw data:WET\_B2\_090616\_03.mzxml, MS/MS Elution time: 44.28733, Scan number:2338, Mass delta:-0.0041, Rank:1

| No | b      | b++    | b*     | b*++   | b0     | b0++   | Seq | y      | y++    | y*     | y*++   | y0     | y0++   | RevNo |
|----|--------|--------|--------|--------|--------|--------|-----|--------|--------|--------|--------|--------|--------|-------|
| 1  | 129.1  | 65.05  | 112.08 | 56.54  |        |        | K   |        |        |        |        |        |        | 8     |
| 2  | 257.16 | 129.08 | 240.13 | 120.57 |        |        | Q   | 854.51 | 427.76 | 837.48 | 419.25 | 836.5  | 418.75 | 7     |
| 3  | 354.21 | 177.61 | 337.19 | 169.1  |        |        | P   | 726.45 | 363.73 | 709.42 | 355.22 | 708.44 | 354.72 | 6     |
| 4  | 467.3  | 234.15 | 450.27 | 225.64 |        |        | L   | 629.4  | 315.2  | 612.37 | 306.69 | 611.39 | 306.2  | 5     |
| 5  | 582.32 | 291.67 | 565.3  | 283.15 | 564.31 | 282.66 | D   | 516.31 | 258.66 | 499.29 | 250.15 | 498.3  | 249.66 | 4     |
| 6  | 695.41 | 348.21 | 678.38 | 339.69 | 677.4  | 339.2  | L   | 401.29 | 201.15 | 384.26 | 192.63 |        |        | 3     |
| 7  | 808.49 | 404.75 | 791.47 | 396.24 | 790.48 | 395.74 | I   | 288.2  | 144.61 | 271.18 | 136.09 |        |        | 2     |
| 8  |        |        |        |        |        |        | R   | 175.12 | 88.06  | 158.09 | 79.55  |        |        | 1     |

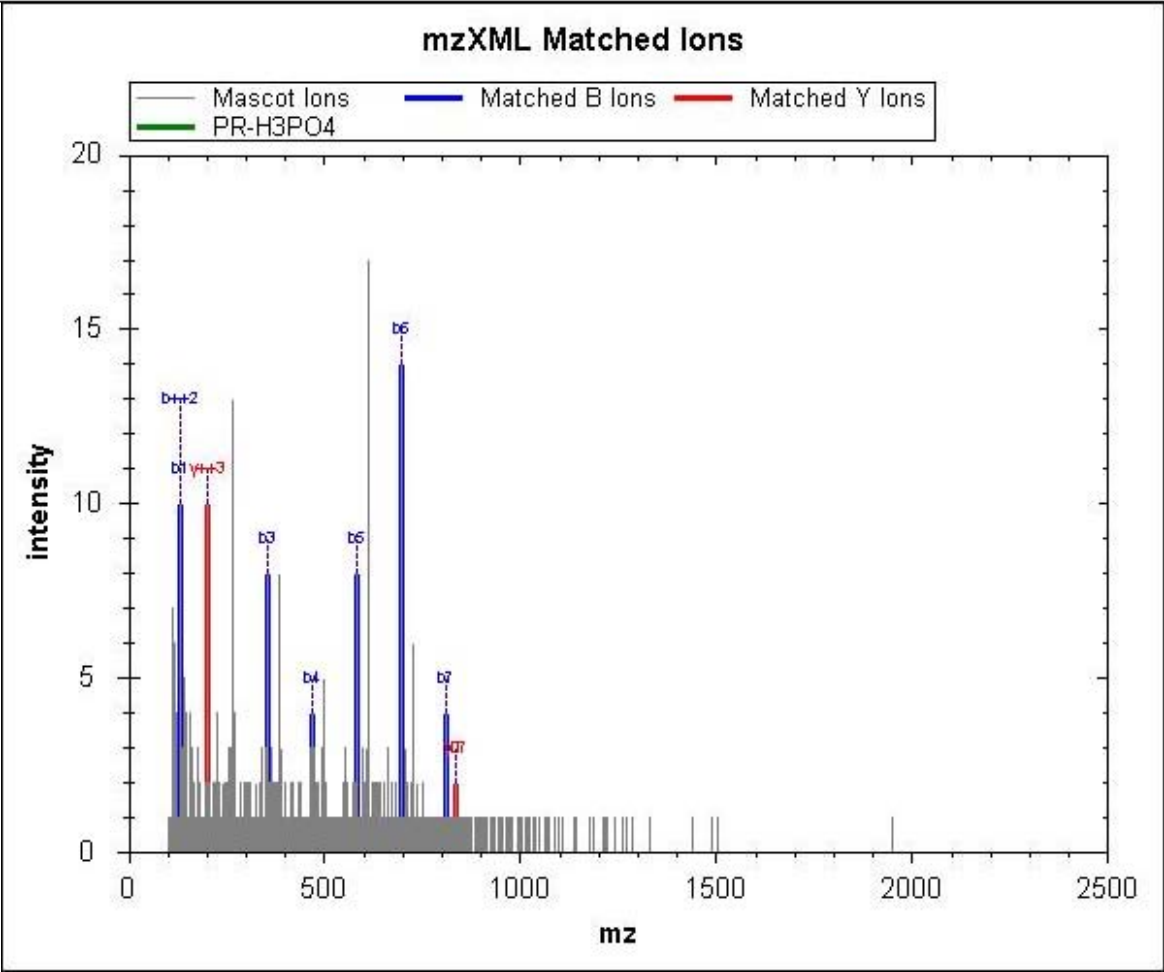

Protein index=1300, ACC No: IPI00299063

Peptide index=5967 MS/MS spectrum

Sequence: ALDTVLFGPPLLTR, m/z:756.9417, charge:+ 2, Modification: , Mod Position:

Score: 52.29, Raw data:WET\_B2\_090616\_01.mzxml, MS/MS Elution time: 80.38084, Scan number:4432, Mass delta:-0.0024, Rank:1

| No | b       | b++    | b0      | b0++   | Seq | y       | y++    | y*      | y*++   | y0      | y0++   | RevNo |
|----|---------|--------|---------|--------|-----|---------|--------|---------|--------|---------|--------|-------|
| 1  | 72.04   | 36.53  |         |        | A   |         |        |         |        |         |        | 14    |
| 2  | 185.13  | 93.07  |         |        | L   | 1441.84 | 721.42 | 1424.81 | 712.91 | 1423.83 | 712.42 | 13    |
| 3  | 300.16  | 150.58 | 282.14  | 141.58 | D   | 1328.76 | 664.88 | 1311.73 | 656.37 | 1310.75 | 655.88 | 12    |
| 4  | 401.2   | 201.11 | 383.19  | 192.1  | T   | 1213.73 | 607.37 | 1196.7  | 598.86 | 1195.72 | 598.36 | 11    |
| 5  | 500.27  | 250.64 | 482.26  | 241.63 | V   | 1112.68 | 556.84 | 1095.66 | 548.33 | 1094.67 | 547.84 | 10    |
| 6  | 613.36  | 307.18 | 595.34  | 298.18 | L   | 1013.61 | 507.31 | 996.59  | 498.8  | 995.6   | 498.31 | 9     |
| 7  | 760.42  | 380.72 | 742.41  | 371.71 | F   | 900.53  | 450.77 | 883.5   | 442.26 | 882.52  | 441.76 | 8     |
| 8  | 817.45  | 409.23 | 799.43  | 400.22 | G   | 753.46  | 377.23 | 736.44  | 368.72 | 735.45  | 368.23 | 7     |
| 9  | 914.5   | 457.75 | 896.49  | 448.75 | P   | 696.44  | 348.72 | 679.41  | 340.21 | 678.43  | 339.72 | 6     |
| 10 | 1011.55 | 506.28 | 993.54  | 497.27 | P   | 599.39  | 300.2  | 582.36  | 291.68 | 581.38  | 291.19 | 5     |
| 11 | 1124.64 | 562.82 | 1106.62 | 553.82 | L   | 502.33  | 251.67 | 485.31  | 243.16 | 484.32  | 242.67 | 4     |
| 12 | 1237.72 | 619.36 | 1219.71 | 610.36 | L   | 389.25  | 195.13 | 372.22  | 186.62 | 371.24  | 186.12 | 3     |

|    |         |        |         |        |   |        |        |        |        |        |        |   |
|----|---------|--------|---------|--------|---|--------|--------|--------|--------|--------|--------|---|
| 13 | 1338.77 | 669.89 | 1320.76 | 660.88 | T | 276.17 | 138.59 | 259.14 | 130.07 | 258.16 | 129.58 | 2 |
| 14 |         |        |         |        | R | 175.12 | 88.06  | 158.09 | 79.55  |        |        | 1 |

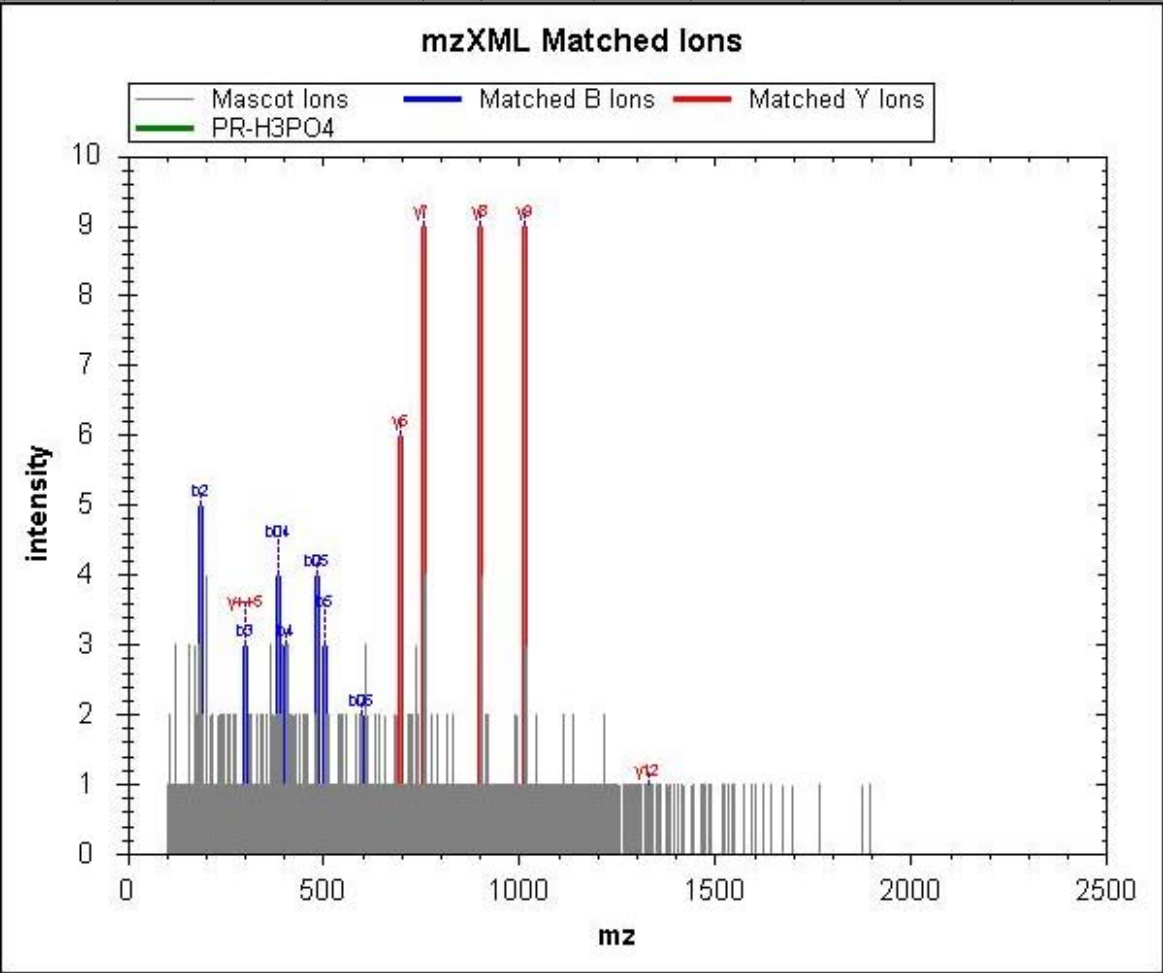

Protein index=1301, ACC No:IPI00644055

Peptide index=5876 MS/MS spectrum

Sequence: VTGLTEGLVDVILYHQPDDK, m/z:738.0514, charge:+ 3, Modification: , Mod Position:

Score: 72.07, Raw data:WET\_B2\_090616\_01.mzxml, MS/MS Elution time: 79.35, Scan number:4372, Mass delta:-0.0099, Rank:1

|    |         |         |         |         |         |         |   |         |        |         |        |         |        |    |
|----|---------|---------|---------|---------|---------|---------|---|---------|--------|---------|--------|---------|--------|----|
| 11 | 1084.59 | 542.8   |         |         | 1066.58 | 533.79  | V | 1227.64 | 614.32 | 1210.61 | 605.81 | 1209.63 | 605.32 | 10 |
| 12 | 1197.67 | 599.34  |         |         | 1179.66 | 590.33  | I | 1128.57 | 564.79 | 1111.54 | 556.27 | 1110.56 | 555.78 | 9  |
| 13 | 1310.76 | 655.88  |         |         | 1292.75 | 646.88  | L | 1015.48 | 508.25 | 998.46  | 499.73 | 997.47  | 499.24 | 8  |
| 14 | 1473.82 | 737.41  |         |         | 1455.81 | 728.41  | Y | 902.4   | 451.7  | 885.37  | 443.19 | 884.39  | 442.7  | 7  |
| 15 | 1610.88 | 805.94  |         |         | 1592.87 | 796.94  | H | 739.34  | 370.17 | 722.31  | 361.66 | 721.33  | 361.17 | 6  |
| 16 | 1738.94 | 869.97  | 1721.91 | 861.46  | 1720.93 | 860.97  | Q | 602.28  | 301.64 | 585.25  | 293.13 | 584.27  | 292.64 | 5  |
| 17 | 1835.99 | 918.5   | 1818.96 | 909.99  | 1817.98 | 909.49  | P | 474.22  | 237.61 | 457.19  | 229.1  | 456.21  | 228.61 | 4  |
| 18 | 1951.02 | 976.01  | 1933.99 | 967.5   | 1933.01 | 967.01  | D | 377.17  | 189.09 | 360.14  | 180.57 | 359.16  | 180.08 | 3  |
| 19 | 2066.04 | 1033.53 | 2049.02 | 1025.01 | 2048.03 | 1024.52 | D | 262.14  | 131.57 | 245.11  | 123.06 | 244.13  | 122.57 | 2  |
| 20 |         |         |         |         |         |         | K | 147.11  | 74.06  | 130.09  | 65.55  |         |        | 1  |

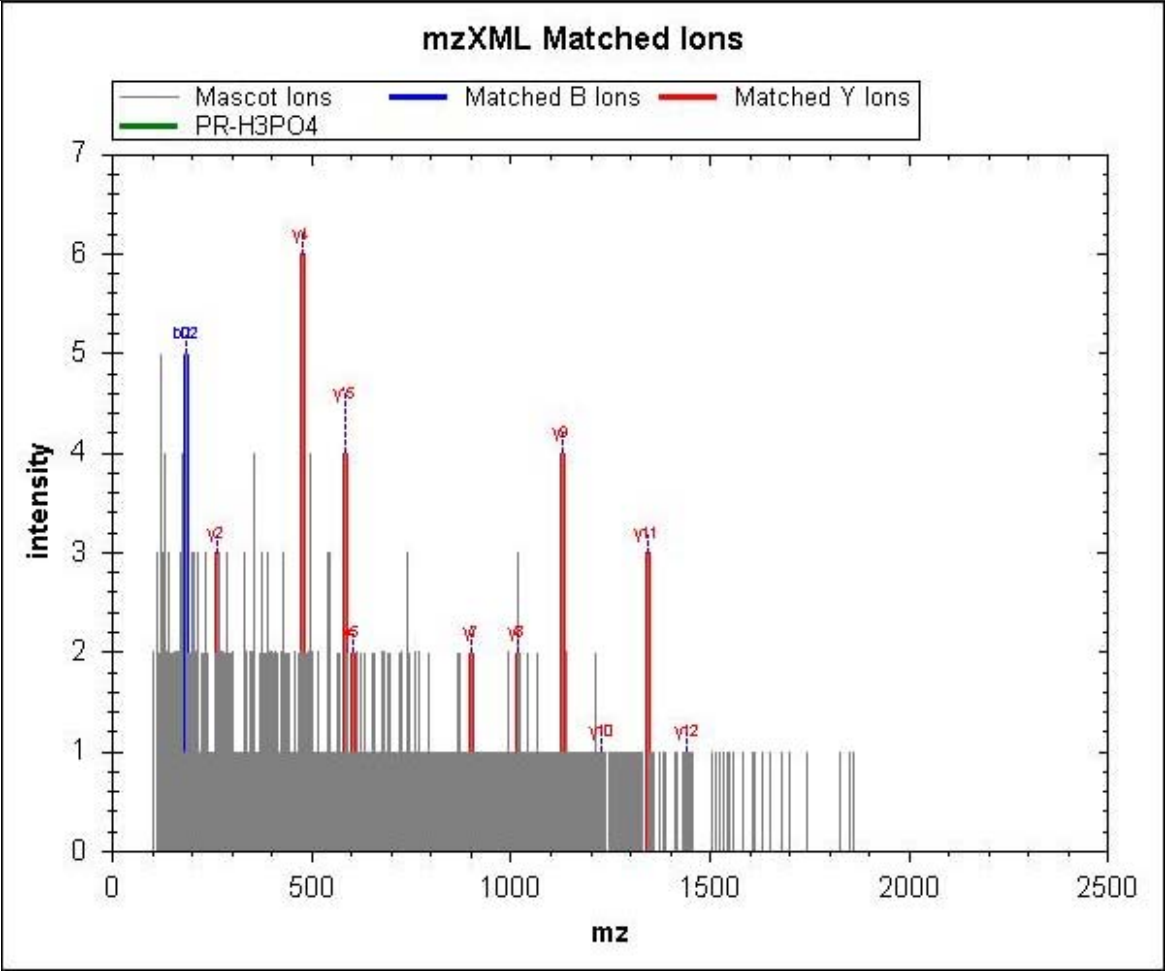

Protein index=1303, ACC No: IPI00465059

Peptide index=5339 MS/MS spectrum

Sequence: SAFLQAFLGR, m/z:555.3122, charge: + 2, Modification: , Mod Position:

Score: 61.91, Raw data: WET\_B2\_090616\_01.mzxml, MS/MS Elution time: 72.09599, Scan number: 3951, Mass delta: 0.007, Rank: 1

| No | b      | b++   | b* | b*++ | b0     | b0++  | Seq | y       | y++    | y*      | y*++   | RevNo |
|----|--------|-------|----|------|--------|-------|-----|---------|--------|---------|--------|-------|
| 1  | 88.04  | 44.52 |    |      | 70.03  | 35.52 | S   |         |        |         |        | 10    |
| 2  | 159.08 | 80.04 |    |      | 141.07 | 71.04 | A   | 1022.58 | 511.79 | 1005.55 | 503.28 | 9     |

|    |        |        |        |        |        |        |   |        |        |        |        |   |
|----|--------|--------|--------|--------|--------|--------|---|--------|--------|--------|--------|---|
| 3  | 306.14 | 153.58 |        |        | 288.13 | 144.57 | F | 951.54 | 476.27 | 934.51 | 467.76 | 8 |
| 4  | 419.23 | 210.12 |        |        | 401.22 | 201.11 | L | 804.47 | 402.74 | 787.45 | 394.23 | 7 |
| 5  | 547.29 | 274.15 | 530.26 | 265.63 | 529.28 | 265.14 | Q | 691.39 | 346.2  | 674.36 | 337.68 | 6 |
| 6  | 618.32 | 309.67 | 601.3  | 301.15 | 600.31 | 300.66 | A | 563.33 | 282.17 | 546.3  | 273.66 | 5 |
| 7  | 765.39 | 383.2  | 748.37 | 374.69 | 747.38 | 374.19 | F | 492.29 | 246.65 | 475.27 | 238.14 | 4 |
| 8  | 878.48 | 439.74 | 861.45 | 431.23 | 860.47 | 430.74 | L | 345.22 | 173.12 | 328.2  | 164.6  | 3 |
| 9  | 935.5  | 468.25 | 918.47 | 459.74 | 917.49 | 459.25 | G | 232.14 | 116.57 | 215.11 | 108.06 | 2 |
| 10 |        |        |        |        |        |        | R | 175.12 | 88.06  | 158.09 | 79.55  | 1 |

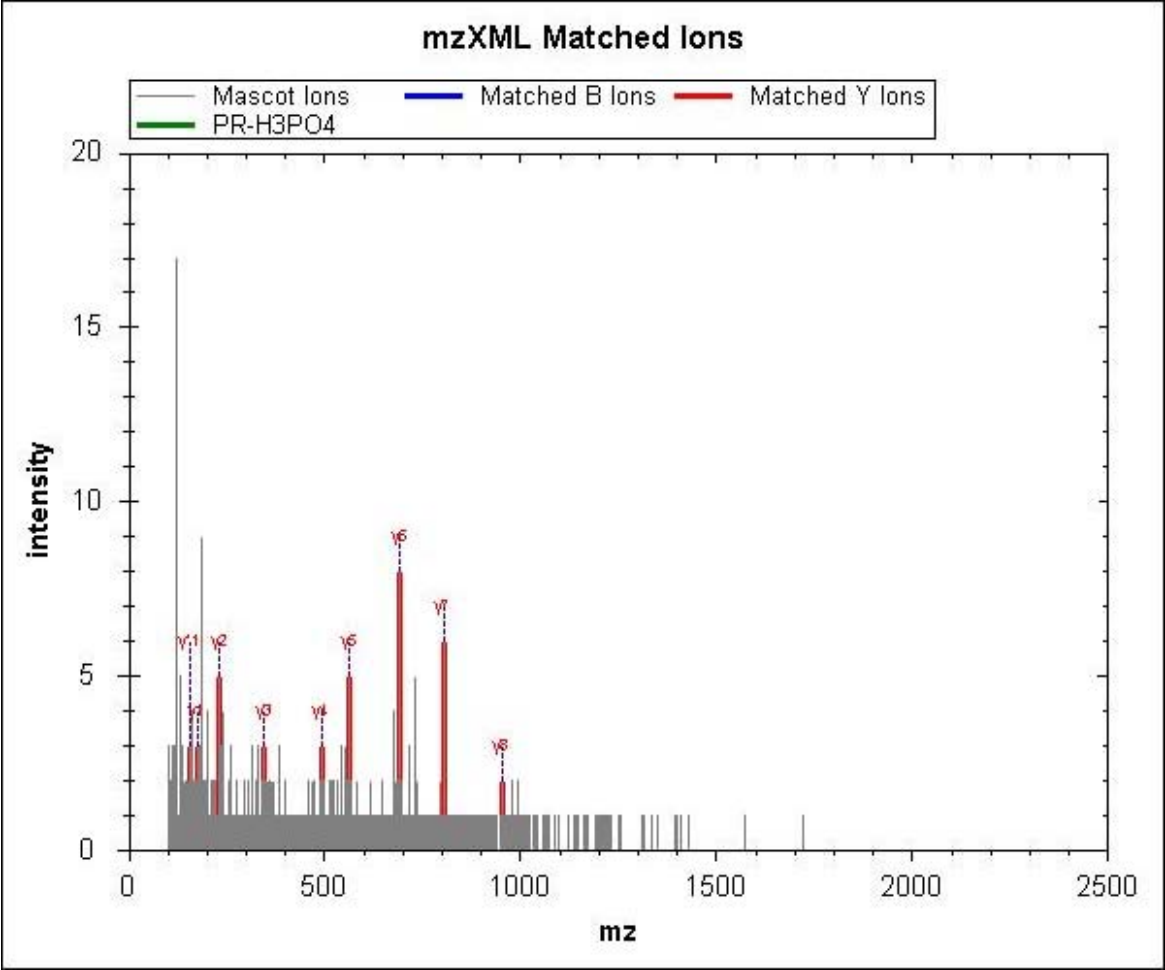

Protein index=1304, ACC No: IPI00394788

Peptide index=7133 MS/MS spectrum

Sequence: APPGFLGSLVPVVVETLGDAYPELQR, m/z:908.8301, charge:+ 3, Modification: , Mod Position:

Score: 55.8, Raw data:WET\_B2\_090616\_01.mzxml, MS/MS Elution time: 108.5282, Scan number:6098, Mass delta:0.0151, Rank:1

| No | b      | b++    | b* | b*++ | b0 | b0++ | Seq | y       | y++     | y*      | y*++    | y0      | y0++    | RevNo |
|----|--------|--------|----|------|----|------|-----|---------|---------|---------|---------|---------|---------|-------|
| 1  | 72.04  | 36.53  |    |      |    |      | A   |         |         |         |         |         |         | 26    |
| 2  | 169.1  | 85.05  |    |      |    |      | P   | 2653.42 | 1327.22 | 2636.4  | 1318.7  | 2635.41 | 1318.21 | 25    |
| 3  | 266.15 | 133.58 |    |      |    |      | P   | 2556.37 | 1278.69 | 2539.34 | 1270.18 | 2538.36 | 1269.68 | 24    |

|    |         |         |         |         |         |         |   |         |         |         |         |         |         |    |
|----|---------|---------|---------|---------|---------|---------|---|---------|---------|---------|---------|---------|---------|----|
| 4  | 323.17  | 162.09  |         |         |         |         | G | 2459.32 | 1230.16 | 2442.29 | 1221.65 | 2441.31 | 1221.16 | 23 |
| 5  | 470.24  | 235.62  |         |         |         |         | F | 2402.3  | 1201.65 | 2385.27 | 1193.14 | 2384.29 | 1192.65 | 22 |
| 6  | 583.32  | 292.17  |         |         |         |         | L | 2255.23 | 1128.12 | 2238.2  | 1119.6  | 2237.22 | 1119.11 | 21 |
| 7  | 640.35  | 320.68  |         |         |         |         | G | 2142.14 | 1071.58 | 2125.12 | 1063.06 | 2124.13 | 1062.57 | 20 |
| 8  | 727.38  | 364.19  |         |         | 709.37  | 355.19  | S | 2085.12 | 1043.06 | 2068.1  | 1034.55 | 2067.11 | 1034.06 | 19 |
| 9  | 840.46  | 420.73  |         |         | 822.45  | 411.73  | L | 1998.09 | 999.55  | 1981.06 | 991.04  | 1980.08 | 990.54  | 18 |
| 10 | 939.53  | 470.27  |         |         | 921.52  | 461.26  | V | 1885.01 | 943.01  | 1867.98 | 934.49  | 1867    | 934     | 17 |
| 11 | 1036.58 | 518.79  |         |         | 1018.57 | 509.79  | P | 1785.94 | 893.47  | 1768.91 | 884.96  | 1767.93 | 884.47  | 16 |
| 12 | 1135.65 | 568.33  |         |         | 1117.64 | 559.32  | V | 1688.89 | 844.95  | 1671.86 | 836.43  | 1670.87 | 835.94  | 15 |
| 13 | 1234.72 | 617.86  |         |         | 1216.71 | 608.86  | V | 1589.82 | 795.41  | 1572.79 | 786.9   | 1571.81 | 786.41  | 14 |
| 14 | 1333.79 | 667.4   |         |         | 1315.78 | 658.39  | V | 1490.75 | 745.88  | 1473.72 | 737.36  | 1472.74 | 736.87  | 13 |
| 15 | 1462.83 | 731.92  |         |         | 1444.82 | 722.91  | E | 1391.68 | 696.34  | 1374.65 | 687.83  | 1373.67 | 687.34  | 12 |
| 16 | 1563.88 | 782.44  |         |         | 1545.87 | 773.44  | T | 1262.64 | 631.82  | 1245.61 | 623.31  | 1244.63 | 622.82  | 11 |
| 17 | 1676.96 | 838.98  |         |         | 1658.95 | 829.98  | L | 1161.59 | 581.3   | 1144.56 | 572.79  | 1143.58 | 572.29  | 10 |
| 18 | 1733.98 | 867.5   |         |         | 1715.97 | 858.49  | G | 1048.51 | 524.76  | 1031.48 | 516.24  | 1030.5  | 515.75  | 9  |
| 19 | 1849.01 | 925.01  |         |         | 1831    | 916     | D | 991.48  | 496.25  | 974.46  | 487.73  | 973.47  | 487.24  | 8  |
| 20 | 1920.05 | 960.53  |         |         | 1902.04 | 951.52  | A | 876.46  | 438.73  | 859.43  | 430.22  | 858.45  | 429.73  | 7  |
| 21 | 2083.11 | 1042.06 |         |         | 2065.1  | 1033.05 | Y | 805.42  | 403.21  | 788.39  | 394.7   | 787.41  | 394.21  | 6  |
| 22 | 2180.16 | 1090.59 |         |         | 2162.15 | 1081.58 | P | 642.36  | 321.68  | 625.33  | 313.17  | 624.35  | 312.68  | 5  |
| 23 | 2309.21 | 1155.11 |         |         | 2291.2  | 1146.1  | E | 545.3   | 273.16  | 528.28  | 264.64  | 527.29  | 264.15  | 4  |
| 24 | 2422.29 | 1211.65 |         |         | 2404.28 | 1202.64 | L | 416.26  | 208.63  | 399.24  | 200.12  |         |         | 3  |
| 25 | 2550.35 | 1275.68 | 2533.32 | 1267.16 | 2532.34 | 1266.67 | Q | 303.18  | 152.09  | 286.15  | 143.58  |         |         | 2  |
| 26 |         |         |         |         |         |         | R | 175.12  | 88.06   | 158.09  | 79.55   |         |         | 1  |

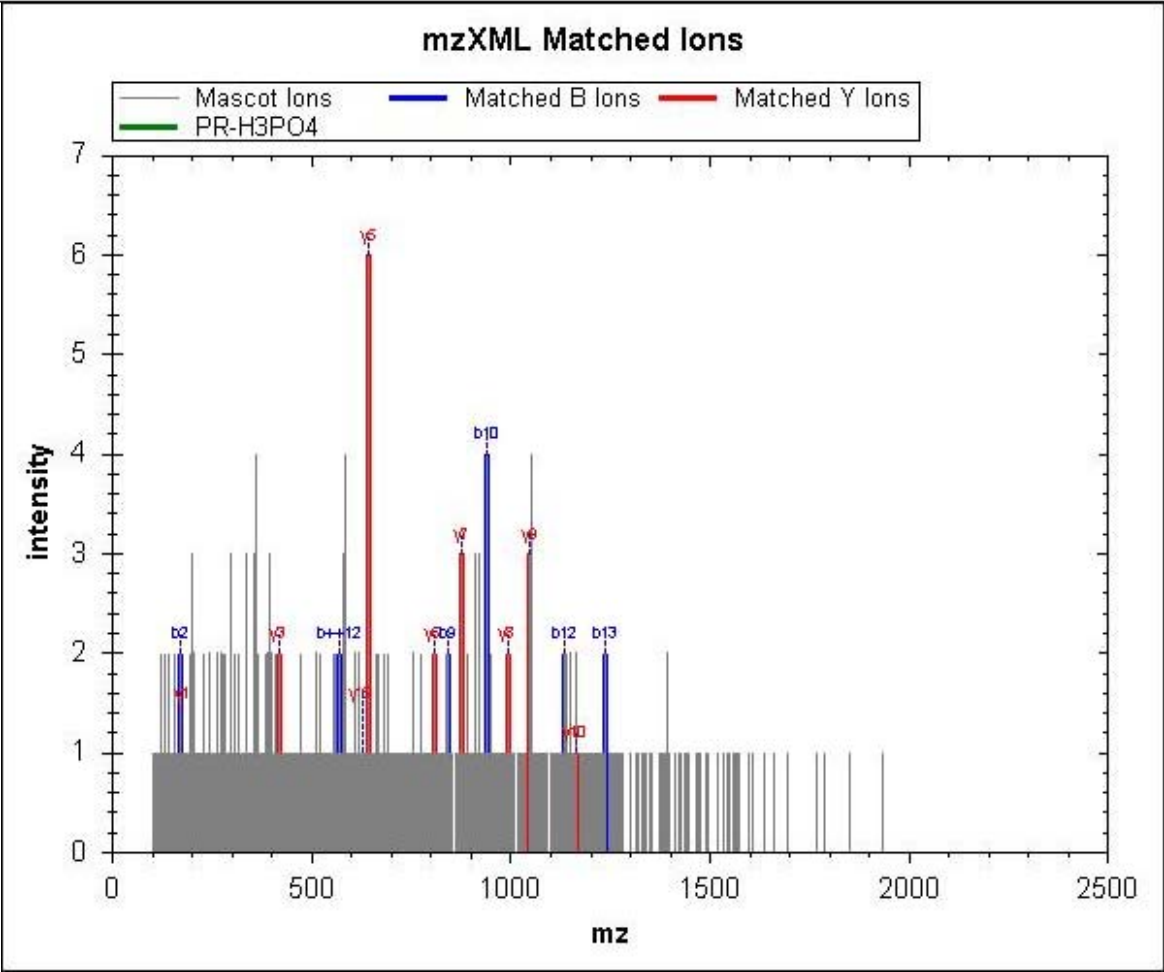

Protein index=1305, ACC No:IPI00006725

Peptide index=812 MS/MS spectrum

Sequence: HQVQLLGR, m/z:475.7763, charge:+ 2, Modification: , Mod Position:

Score: 34.92, Raw data:WET\_B2\_090616\_01.mzxml, MS/MS Elution time: 25.21817, Scan number:1228, Mass delta:-0.0078, Rank:1

| No | b      | b++    | b*     | b*++   | Seq | y      | y++    | y*     | y*++   | RevNo |
|----|--------|--------|--------|--------|-----|--------|--------|--------|--------|-------|
| 1  | 138.07 | 69.54  |        |        | H   |        |        |        |        | 8     |
| 2  | 266.12 | 133.57 | 249.1  | 125.05 | Q   | 813.49 | 407.25 | 796.47 | 398.74 | 7     |
| 3  | 365.19 | 183.1  | 348.17 | 174.59 | V   | 685.44 | 343.22 | 668.41 | 334.71 | 6     |
| 4  | 493.25 | 247.13 | 476.23 | 238.62 | Q   | 586.37 | 293.69 | 569.34 | 285.17 | 5     |
| 5  | 606.34 | 303.67 | 589.31 | 295.16 | L   | 458.31 | 229.66 | 441.28 | 221.14 | 4     |
| 6  | 719.42 | 360.21 | 702.39 | 351.7  | L   | 345.22 | 173.12 | 328.2  | 164.6  | 3     |
| 7  | 776.44 | 388.72 | 759.41 | 380.21 | G   | 232.14 | 116.57 | 215.11 | 108.06 | 2     |
| 8  |        |        |        |        | R   | 175.12 | 88.06  | 158.09 | 79.55  | 1     |

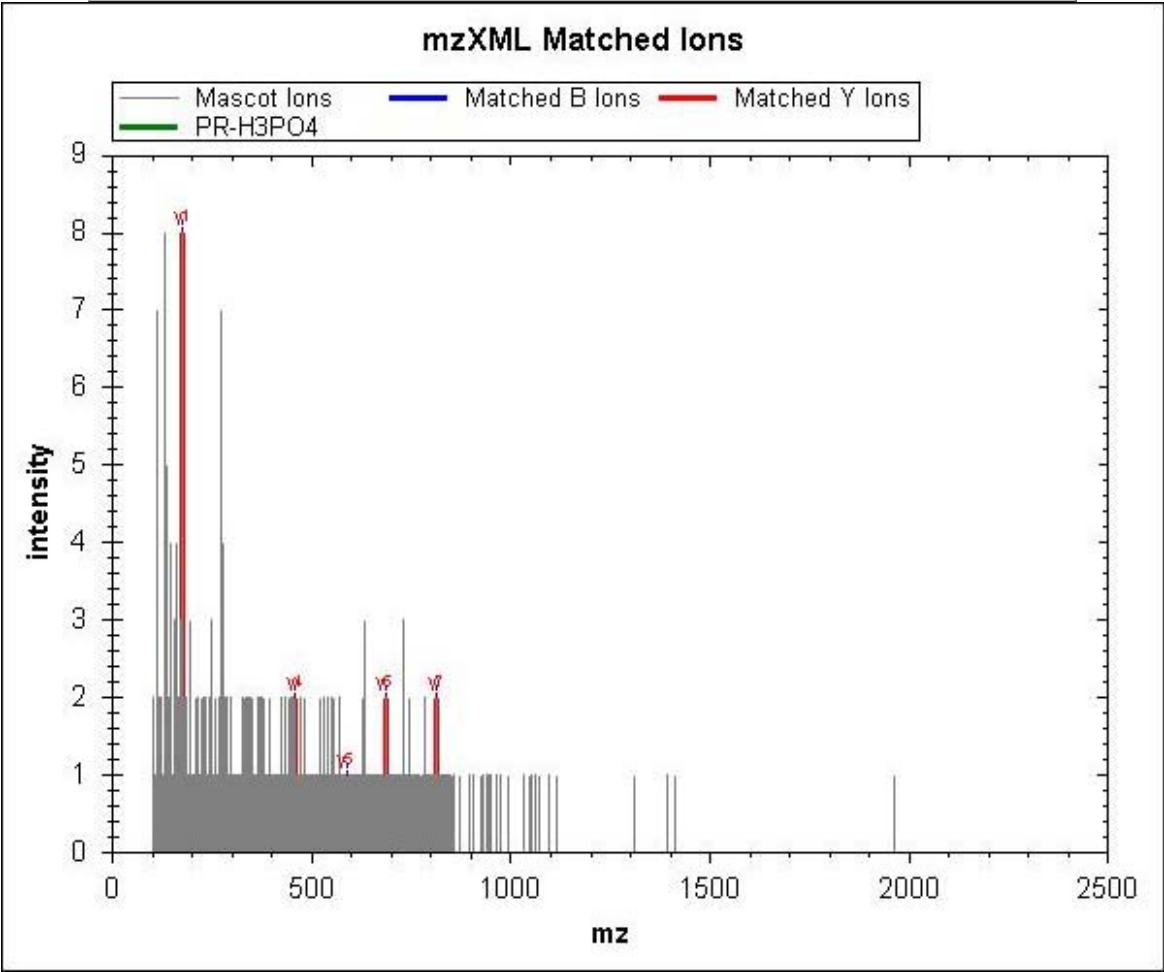

Protein index=1307, ACC No: IPI00218916

Peptide index=5812 MS/MS spectrum

Sequence: GVV<sup>T</sup>IEQIVDTLPDR, m/z:827.9517, charge: + 2, Modification: , Mod Position:

Score: 58.57, Raw data: WET\_B2\_090616\_01.mzxml, MS/MS Elution time: 78.41216, Scan number: 4318, Mass delta: -0.0049, Rank: 1

| No | b       | b++    | b*      | b*++   | b0      | b0++   | Seq | y       | y++    | y*      | y*++   | y0      | y0++   | RevNo |
|----|---------|--------|---------|--------|---------|--------|-----|---------|--------|---------|--------|---------|--------|-------|
| 1  | 58.03   | 29.52  |         |        |         |        | G   |         |        |         |        |         |        | 15    |
| 2  | 157.1   | 79.05  |         |        |         |        | V   | 1597.88 | 799.44 | 1580.85 | 790.93 | 1579.87 | 790.44 | 14    |
| 3  | 256.17  | 128.59 |         |        |         |        | V   | 1498.81 | 749.91 | 1481.78 | 741.4  | 1480.8  | 740.9  | 13    |
| 4  | 357.21  | 179.11 |         |        | 339.2   | 170.1  | T   | 1399.74 | 700.38 | 1382.72 | 691.86 | 1381.73 | 691.37 | 12    |
| 5  | 470.3   | 235.65 |         |        | 452.29  | 226.65 | I   | 1298.7  | 649.85 | 1281.67 | 641.34 | 1280.68 | 640.85 | 11    |
| 6  | 599.34  | 300.17 |         |        | 581.33  | 291.17 | E   | 1185.61 | 593.31 | 1168.58 | 584.8  | 1167.6  | 584.3  | 10    |
| 7  | 727.4   | 364.2  | 710.37  | 355.69 | 709.39  | 355.2  | Q   | 1056.57 | 528.79 | 1039.54 | 520.27 | 1038.56 | 519.78 | 9     |
| 8  | 840.48  | 420.74 | 823.46  | 412.23 | 822.47  | 411.74 | I   | 928.51  | 464.76 | 911.48  | 456.25 | 910.5   | 455.75 | 8     |
| 9  | 939.55  | 470.28 | 922.52  | 461.77 | 921.54  | 461.27 | V   | 815.43  | 408.22 | 798.4   | 399.7  | 797.42  | 399.21 | 7     |
| 10 | 1054.58 | 527.79 | 1037.55 | 519.28 | 1036.57 | 518.79 | D   | 716.36  | 358.68 | 699.33  | 350.17 | 698.35  | 349.68 | 6     |
| 11 | 1155.63 | 578.32 | 1138.6  | 569.8  | 1137.62 | 569.31 | T   | 601.33  | 301.17 | 584.3   | 292.66 | 583.32  | 292.16 | 5     |
| 12 | 1268.71 | 634.86 | 1251.68 | 626.35 | 1250.7  | 625.85 | L   | 500.28  | 250.65 | 483.26  | 242.13 | 482.27  | 241.64 | 4     |

|    |         |        |         |        |         |        |   |        |        |        |        |        |        |   |
|----|---------|--------|---------|--------|---------|--------|---|--------|--------|--------|--------|--------|--------|---|
| 13 | 1365.76 | 683.38 | 1348.74 | 674.87 | 1347.75 | 674.38 | P | 387.2  | 194.1  | 370.17 | 185.59 | 369.19 | 185.1  | 3 |
| 14 | 1480.79 | 740.9  | 1463.76 | 732.39 | 1462.78 | 731.89 | D | 290.15 | 145.58 | 273.12 | 137.06 | 272.14 | 136.57 | 2 |
| 15 |         |        |         |        |         |        | R | 175.12 | 88.06  | 158.09 | 79.55  |        |        | 1 |

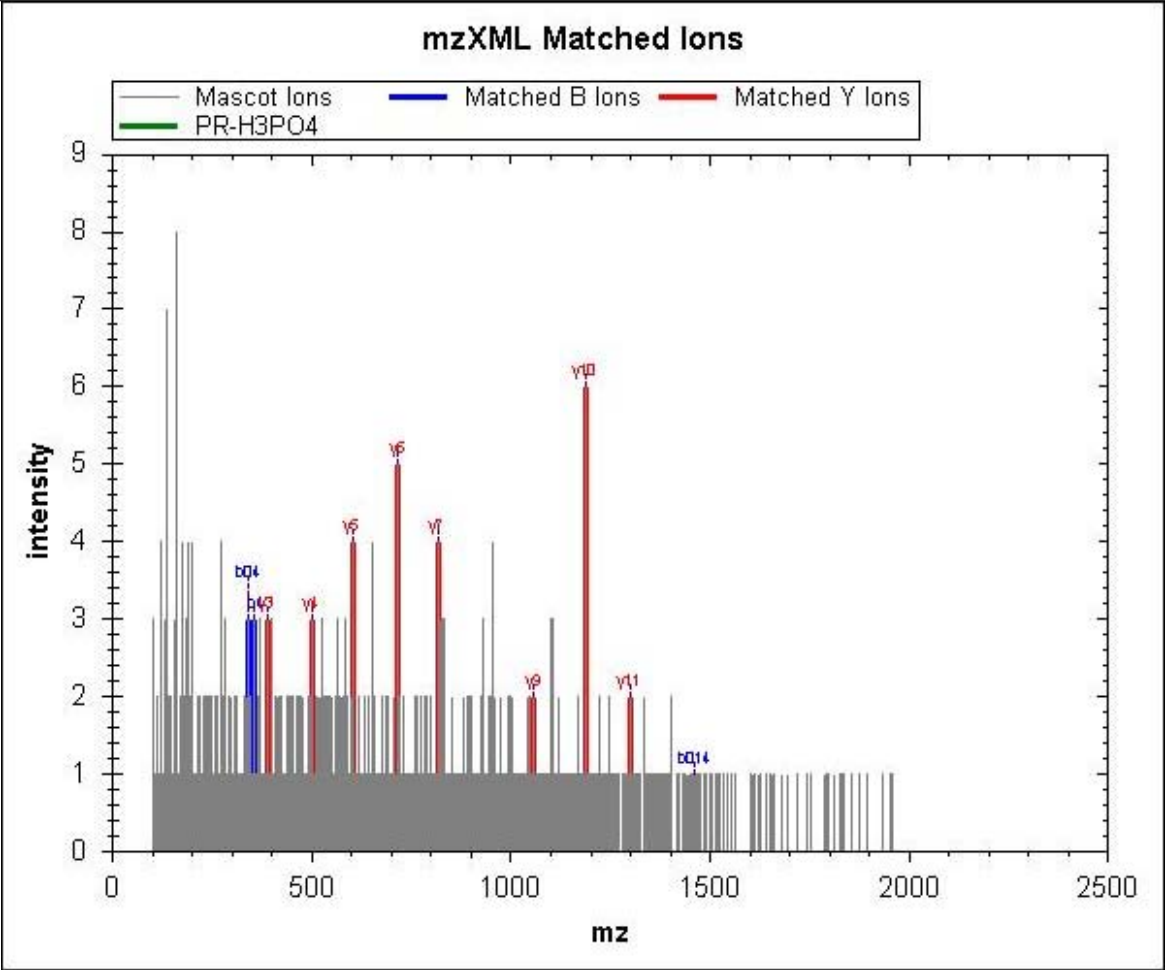

Protein index=1308, ACC No:IP100470883

Peptide index=6620 MS/MS spectrum

Sequence: ITELFAVALPQLLAK, m/z:813.9963, charge:+ 2, Modification: , Mod Position:

Score: 48.8, Raw data:WET\_B2\_090616\_03.mzxml, MS/MS Elution time: 92.28833, Scan number:5127, Mass delta:-0.0115, Rank:1

| No | b      | b++    | b* | b*++ | b0     | b0++   | Seq | y       | y++    | y*      | y*++   | y0      | y0++   | RevNo |
|----|--------|--------|----|------|--------|--------|-----|---------|--------|---------|--------|---------|--------|-------|
| 1  | 114.09 | 57.55  |    |      |        |        | I   |         |        |         |        |         |        | 15    |
| 2  | 215.14 | 108.07 |    |      | 197.13 | 99.07  | T   | 1513.9  | 757.45 | 1496.87 | 748.94 | 1495.89 | 748.45 | 14    |
| 3  | 344.18 | 172.59 |    |      | 326.17 | 163.59 | E   | 1412.85 | 706.93 | 1395.82 | 698.42 | 1394.84 | 697.92 | 13    |
| 4  | 457.27 | 229.14 |    |      | 439.26 | 220.13 | L   | 1283.81 | 642.41 | 1266.78 | 633.89 |         |        | 12    |
| 5  | 604.33 | 302.67 |    |      | 586.32 | 293.67 | F   | 1170.72 | 585.87 | 1153.7  | 577.35 |         |        | 11    |
| 6  | 675.37 | 338.19 |    |      | 657.36 | 329.18 | A   | 1023.66 | 512.33 | 1006.63 | 503.82 |         |        | 10    |
| 7  | 774.44 | 387.72 |    |      | 756.43 | 378.72 | V   | 952.62  | 476.81 | 935.59  | 468.3  |         |        | 9     |
| 8  | 845.48 | 423.24 |    |      | 827.47 | 414.24 | A   | 853.55  | 427.28 | 836.52  | 418.77 |         |        | 8     |
| 9  | 958.56 | 479.78 |    |      | 940.55 | 470.78 | L   | 782.51  | 391.76 | 765.49  | 383.25 |         |        | 7     |

|    |         |        |         |        |         |        |   |        |        |        |        |  |  |   |
|----|---------|--------|---------|--------|---------|--------|---|--------|--------|--------|--------|--|--|---|
| 10 | 1055.61 | 528.31 |         |        | 1037.6  | 519.31 | P | 669.43 | 335.22 | 652.4  | 326.71 |  |  | 6 |
| 11 | 1183.67 | 592.34 | 1166.65 | 583.83 | 1165.66 | 583.33 | Q | 572.38 | 286.69 | 555.35 | 278.18 |  |  | 5 |
| 12 | 1296.76 | 648.88 | 1279.73 | 640.37 | 1278.75 | 639.88 | L | 444.32 | 222.66 | 427.29 | 214.15 |  |  | 4 |
| 13 | 1409.84 | 705.42 | 1392.81 | 696.91 | 1391.83 | 696.42 | L | 331.23 | 166.12 | 314.21 | 157.61 |  |  | 3 |
| 14 | 1480.88 | 740.94 | 1463.85 | 732.43 | 1462.87 | 731.94 | A | 218.15 | 109.58 | 201.12 | 101.07 |  |  | 2 |
| 15 |         |        |         |        |         |        | K | 147.11 | 74.06  | 130.09 | 65.55  |  |  | 1 |

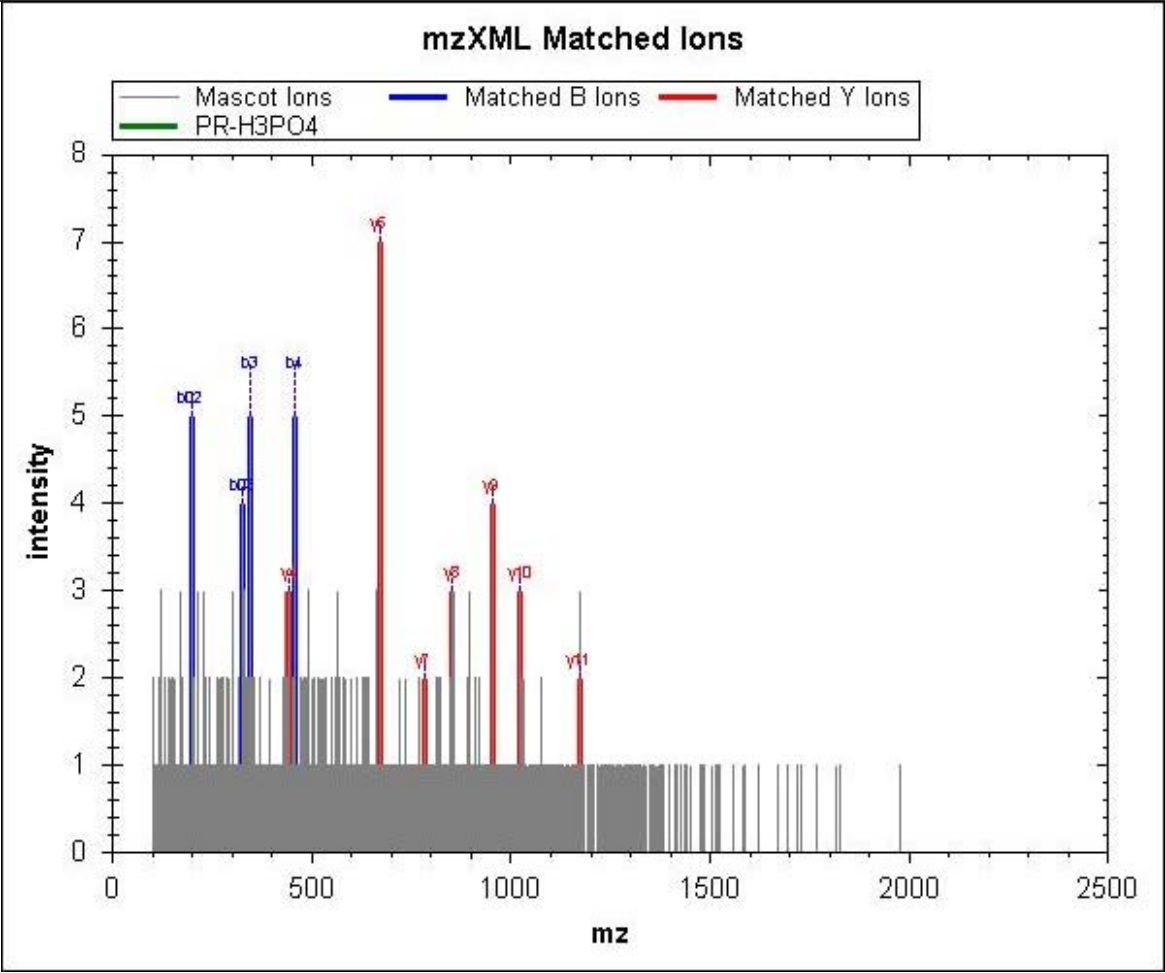

Protein index=1309, ACC No: IPI00783726

Peptide index=5750 MS/MS spectrum

Sequence: SVEELLEAELLK, m/z:686.8817, charge:+ 2, Modification: , Mod Position:

Score: 35.45, Raw data:WET\_B2\_090616\_01.mzxml, MS/MS Elution time: 77.67667, Scan number:4275, Mass delta:-0.0009, Rank:1

| No | b      | b++    | b0     | b0++   | Seq | y       | y++    | y*      | y*++   | y0      | y0++   | RevNo |
|----|--------|--------|--------|--------|-----|---------|--------|---------|--------|---------|--------|-------|
| 1  | 88.04  | 44.52  | 70.03  | 35.52  | S   |         |        |         |        |         |        | 12    |
| 2  | 187.11 | 94.06  | 169.1  | 85.05  | V   | 1285.72 | 643.37 | 1268.7  | 634.85 | 1267.71 | 634.36 | 11    |
| 3  | 316.15 | 158.58 | 298.14 | 149.57 | E   | 1186.66 | 593.83 | 1169.63 | 585.32 | 1168.65 | 584.83 | 10    |
| 4  | 445.19 | 223.1  | 427.18 | 214.09 | E   | 1057.61 | 529.31 | 1040.59 | 520.8  | 1039.6  | 520.31 | 9     |
| 5  | 558.28 | 279.64 | 540.27 | 270.64 | L   | 928.57  | 464.79 | 911.54  | 456.28 | 910.56  | 455.78 | 8     |
| 6  | 671.36 | 336.18 | 653.35 | 327.18 | L   | 815.49  | 408.25 | 798.46  | 399.73 | 797.48  | 399.24 | 7     |

|    |         |        |         |        |   |        |        |        |        |        |        |   |
|----|---------|--------|---------|--------|---|--------|--------|--------|--------|--------|--------|---|
| 7  | 800.4   | 400.71 | 782.39  | 391.7  | E | 702.4  | 351.71 | 685.38 | 343.19 | 684.39 | 342.7  | 6 |
| 8  | 871.44  | 436.22 | 853.43  | 427.22 | A | 573.36 | 287.18 | 556.33 | 278.67 | 555.35 | 278.18 | 5 |
| 9  | 1000.48 | 500.75 | 982.47  | 491.74 | E | 502.32 | 251.67 | 485.3  | 243.15 | 484.31 | 242.66 | 4 |
| 10 | 1113.57 | 557.29 | 1095.56 | 548.28 | L | 373.28 | 187.14 | 356.25 | 178.63 |        |        | 3 |
| 11 | 1226.65 | 613.83 | 1208.64 | 604.82 | L | 260.2  | 130.6  | 243.17 | 122.09 |        |        | 2 |
| 12 |         |        |         |        | K | 147.11 | 74.06  | 130.09 | 65.55  |        |        | 1 |

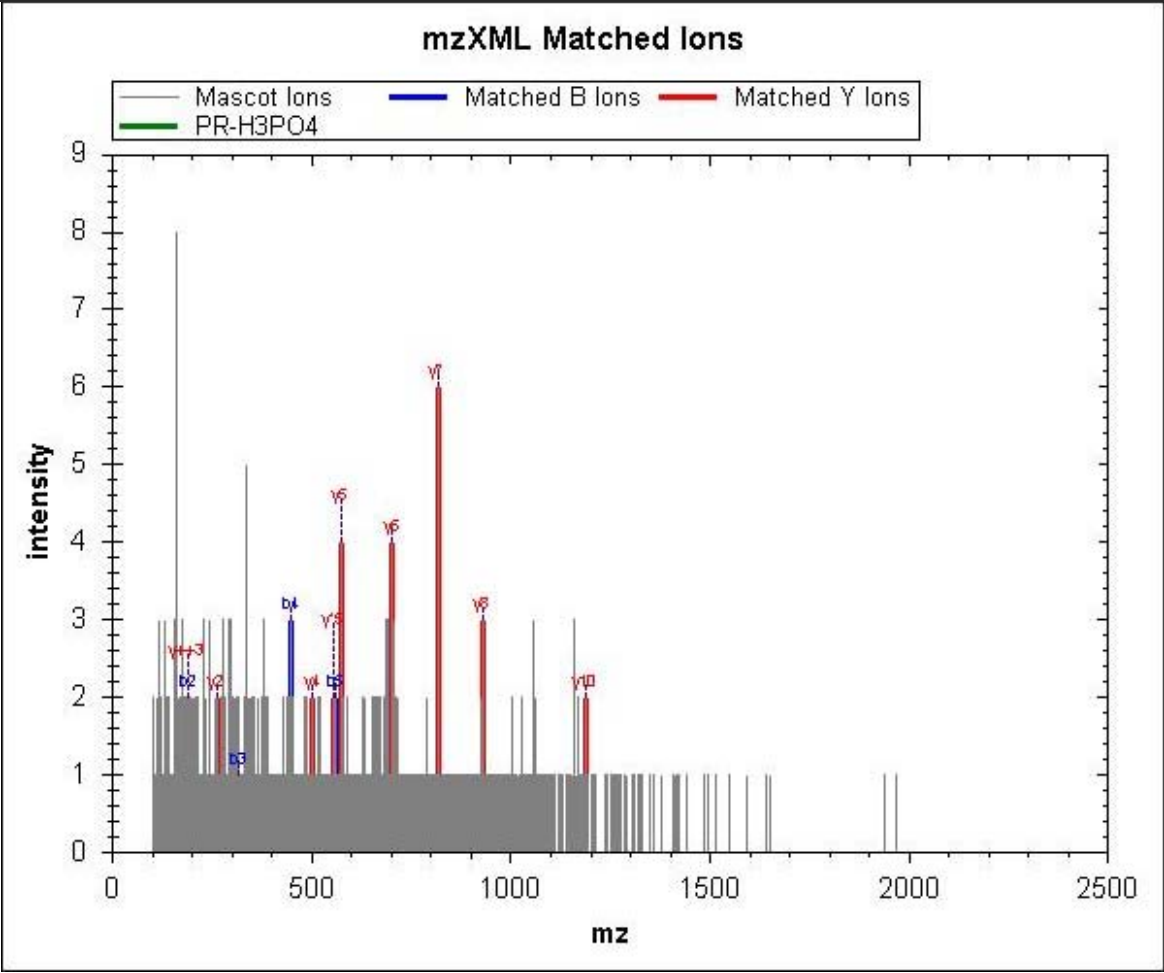

Protein index=1311, ACC No:IP100470468

Peptide index=7238 MS/MS spectrum

Sequence: AGIIQVLLEAVAIAAK, m/z:790.4966, charge:+ 2, Modification: , Mod Position:

Score: 49.02, Raw data:WET\_B2\_090616\_01.mzxml, MS/MS Elution time: 115.372, Scan number:6599, Mass delta:0.0078, Rank:1

| No | b      | b++    | b*     | b*++   | b0 | b0++ | Seq | y       | y++    | y*      | y*++   | y0      | y0++   | RevNo |
|----|--------|--------|--------|--------|----|------|-----|---------|--------|---------|--------|---------|--------|-------|
| 1  | 72.04  | 36.53  |        |        |    |      | A   |         |        |         |        |         |        | 16    |
| 2  | 129.07 | 65.04  |        |        |    |      | G   | 1508.94 | 754.97 | 1491.91 | 746.46 | 1490.93 | 745.97 | 15    |
| 3  | 242.15 | 121.58 |        |        |    |      | I   | 1451.92 | 726.46 | 1434.89 | 717.95 | 1433.91 | 717.46 | 14    |
| 4  | 355.23 | 178.12 |        |        |    |      | I   | 1338.84 | 669.92 | 1321.81 | 661.41 | 1320.82 | 660.92 | 13    |
| 5  | 483.29 | 242.15 | 466.27 | 233.64 |    |      | Q   | 1225.75 | 613.38 | 1208.72 | 604.87 | 1207.74 | 604.37 | 12    |
| 6  | 582.36 | 291.68 | 565.33 | 283.17 |    |      | V   | 1097.69 | 549.35 | 1080.67 | 540.84 | 1079.68 | 540.34 | 11    |

|    |         |        |         |        |         |        |   |        |        |        |        |        |        |    |
|----|---------|--------|---------|--------|---------|--------|---|--------|--------|--------|--------|--------|--------|----|
| 7  | 695.45  | 348.23 | 678.42  | 339.71 |         |        | L | 998.62 | 499.82 | 981.6  | 491.3  | 980.61 | 490.81 | 10 |
| 8  | 808.53  | 404.77 | 791.5   | 396.25 |         |        | L | 885.54 | 443.27 | 868.51 | 434.76 | 867.53 | 434.27 | 9  |
| 9  | 937.57  | 469.29 | 920.55  | 460.78 | 919.56  | 460.28 | E | 772.46 | 386.73 | 755.43 | 378.22 | 754.45 | 377.73 | 8  |
| 10 | 1008.61 | 504.81 | 991.58  | 496.29 | 990.6   | 495.8  | A | 643.41 | 322.21 | 626.39 | 313.7  |        |        | 7  |
| 11 | 1107.68 | 554.34 | 1090.65 | 545.83 | 1089.67 | 545.34 | V | 572.38 | 286.69 | 555.35 | 278.18 |        |        | 6  |
| 12 | 1178.71 | 589.86 | 1161.69 | 581.35 | 1160.7  | 580.86 | A | 473.31 | 237.16 | 456.28 | 228.64 |        |        | 5  |
| 13 | 1291.8  | 646.4  | 1274.77 | 637.89 | 1273.79 | 637.4  | I | 402.27 | 201.64 | 385.24 | 193.13 |        |        | 4  |
| 14 | 1362.84 | 681.92 | 1345.81 | 673.41 | 1344.82 | 672.92 | A | 289.19 | 145.1  | 272.16 | 136.58 |        |        | 3  |
| 15 | 1433.87 | 717.44 | 1416.85 | 708.93 | 1415.86 | 708.43 | A | 218.15 | 109.58 | 201.12 | 101.07 |        |        | 2  |
| 16 |         |        |         |        |         |        | K | 147.11 | 74.06  | 130.09 | 65.55  |        |        | 1  |

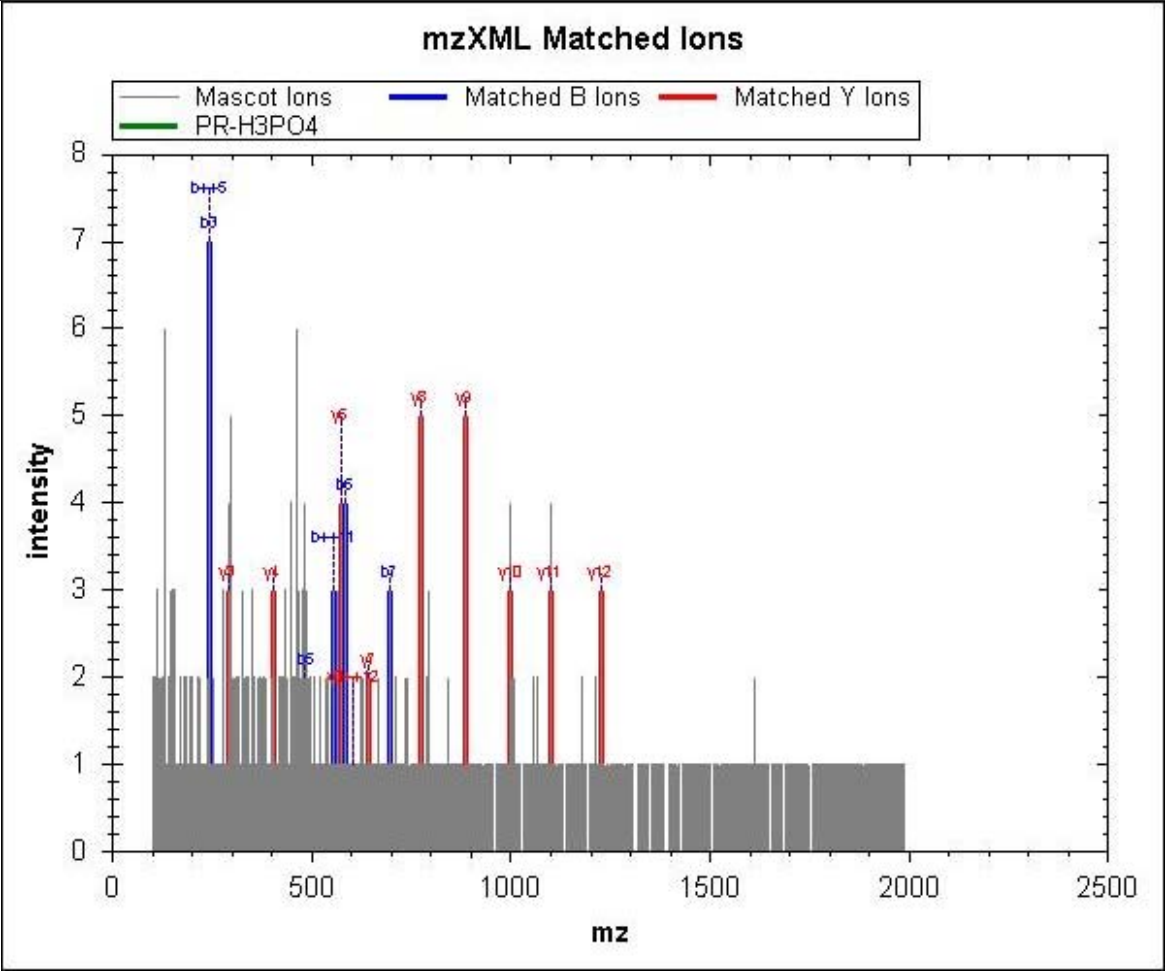

Protein index=1312, ACC No:IPI00152781

Peptide index=5109 MS/MS spectrum

Sequence: SGNELPLAVASTADLR, m/z:863.9701, charge:+ 2, Modification: , Mod Position:

Score: 51.78, Raw data:WET\_B2\_090616\_01.mzxml, MS/MS Elution time: 69.43317, Scan number:3796, Mass delta:-0.0004, Rank:1

| No | b      | b++   | b* | b*++ | b0     | b0++  | Seq | y      | y++    | y*      | y*++   | y0      | y0++   | RevNo |
|----|--------|-------|----|------|--------|-------|-----|--------|--------|---------|--------|---------|--------|-------|
| 1  | 88.04  | 44.52 |    |      | 70.03  | 35.52 | S   |        |        |         |        |         |        | 17    |
| 2  | 145.06 | 73.03 |    |      | 127.05 | 64.03 | G   | 1639.9 | 820.45 | 1622.88 | 811.94 | 1621.89 | 811.45 | 16    |

|    |         |        |         |        |         |        |   |         |        |         |        |         |        |    |
|----|---------|--------|---------|--------|---------|--------|---|---------|--------|---------|--------|---------|--------|----|
| 3  | 259.1   | 130.06 | 242.08  | 121.54 | 241.09  | 121.05 | N | 1582.88 | 791.94 | 1565.85 | 783.43 | 1564.87 | 782.94 | 15 |
| 4  | 388.15  | 194.58 | 371.12  | 186.06 | 370.14  | 185.57 | E | 1468.84 | 734.92 | 1451.81 | 726.41 | 1450.83 | 725.92 | 14 |
| 5  | 501.23  | 251.12 | 484.2   | 242.61 | 483.22  | 242.11 | L | 1339.79 | 670.4  | 1322.77 | 661.89 | 1321.78 | 661.4  | 13 |
| 6  | 598.28  | 299.65 | 581.26  | 291.13 | 580.27  | 290.64 | P | 1226.71 | 613.86 | 1209.68 | 605.35 | 1208.7  | 604.85 | 12 |
| 7  | 711.37  | 356.19 | 694.34  | 347.67 | 693.36  | 347.18 | L | 1129.66 | 565.33 | 1112.63 | 556.82 | 1111.65 | 556.33 | 11 |
| 8  | 782.4   | 391.71 | 765.38  | 383.19 | 764.39  | 382.7  | A | 1016.57 | 508.79 | 999.55  | 500.28 | 998.56  | 499.79 | 10 |
| 9  | 881.47  | 441.24 | 864.45  | 432.73 | 863.46  | 432.23 | V | 945.54  | 473.27 | 928.51  | 464.76 | 927.53  | 464.27 | 9  |
| 10 | 952.51  | 476.76 | 935.48  | 468.25 | 934.5   | 467.75 | A | 846.47  | 423.74 | 829.44  | 415.22 | 828.46  | 414.73 | 8  |
| 11 | 1039.54 | 520.27 | 1022.52 | 511.76 | 1021.53 | 511.27 | S | 775.43  | 388.22 | 758.4   | 379.71 | 757.42  | 379.21 | 7  |
| 12 | 1140.59 | 570.8  | 1123.56 | 562.29 | 1122.58 | 561.79 | T | 688.4   | 344.7  | 671.37  | 336.19 | 670.39  | 335.7  | 6  |
| 13 | 1211.63 | 606.32 | 1194.6  | 597.8  | 1193.62 | 597.31 | A | 587.35  | 294.18 | 570.32  | 285.67 | 569.34  | 285.17 | 5  |
| 14 | 1326.65 | 663.83 | 1309.63 | 655.32 | 1308.64 | 654.83 | D | 516.31  | 258.66 | 499.29  | 250.15 | 498.3   | 249.66 | 4  |
| 15 | 1439.74 | 720.37 | 1422.71 | 711.86 | 1421.73 | 711.37 | L | 401.29  | 201.15 | 384.26  | 192.63 |         |        | 3  |
| 16 | 1552.82 | 776.91 | 1535.8  | 768.4  | 1534.81 | 767.91 | I | 288.2   | 144.61 | 271.18  | 136.09 |         |        | 2  |
| 17 |         |        |         |        |         |        | R | 175.12  | 88.06  | 158.09  | 79.55  |         |        | 1  |

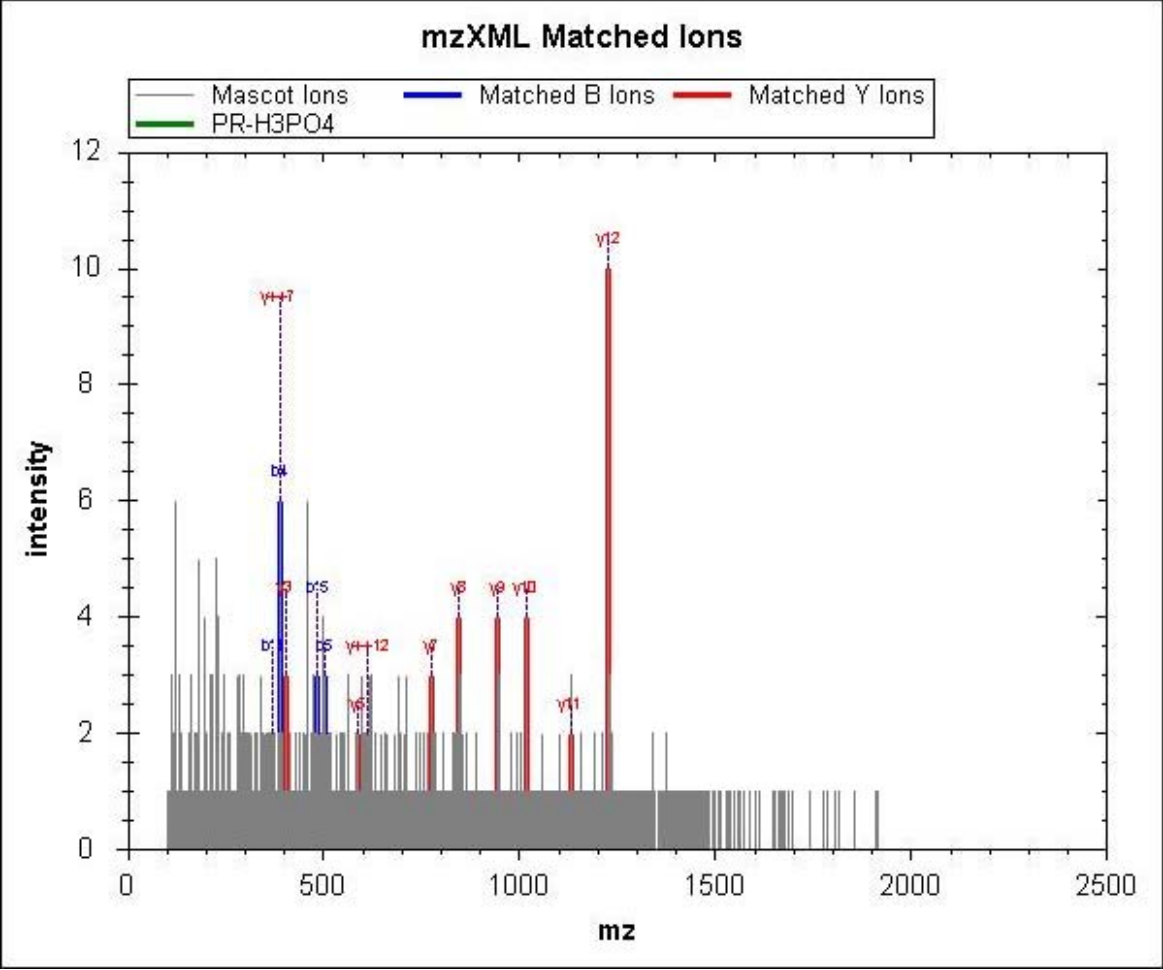

Protein index=1313, ACC No: IPI00014310

Peptide index=7210 MS/MS spectrum

Sequence: MDILAQVLQILLK, m/z:757.4605, charge:+ 2, Modification: Oxidation (M), Mod Position: 0.1000000000000000.0

Score: 58.18, Raw data:WET\_B2\_090616\_01.mzxml, MS/MS Elution time: 113.1057, Scan number:6424, Mass delta:0.0115, Rank:1

| No | b       | b++    | b*      | b*++   | b0      | b0++   | Seq | y       | y++    | y*      | y*++   | y0      | y0++   | RevNo |
|----|---------|--------|---------|--------|---------|--------|-----|---------|--------|---------|--------|---------|--------|-------|
| 1  | 84.04   | 42.53  |         |        |         |        | M   |         |        |         |        |         |        | 13    |
| 2  | 199.07  | 100.04 |         |        | 181.06  | 91.03  | D   | 1366.87 | 683.94 | 1349.84 | 675.42 | 1348.86 | 674.93 | 12    |
| 3  | 312.16  | 156.58 |         |        | 294.14  | 147.58 | I   | 1251.84 | 626.42 | 1234.81 | 617.91 |         |        | 11    |
| 4  | 425.24  | 213.12 |         |        | 407.23  | 204.12 | L   | 1138.76 | 569.88 | 1121.73 | 561.37 |         |        | 10    |
| 5  | 496.28  | 248.64 |         |        | 478.27  | 239.64 | A   | 1025.67 | 513.34 | 1008.65 | 504.83 |         |        | 9     |
| 6  | 624.34  | 312.67 | 607.31  | 304.16 | 606.32  | 303.67 | Q   | 954.63  | 477.82 | 937.61  | 469.31 |         |        | 8     |
| 7  | 723.4   | 362.21 | 706.38  | 353.69 | 705.39  | 353.2  | V   | 826.58  | 413.79 | 809.55  | 405.28 |         |        | 7     |
| 8  | 836.49  | 418.75 | 819.46  | 410.23 | 818.48  | 409.74 | L   | 727.51  | 364.26 | 710.48  | 355.74 |         |        | 6     |
| 9  | 964.55  | 482.78 | 947.52  | 474.26 | 946.54  | 473.77 | Q   | 614.42  | 307.72 | 597.4   | 299.2  |         |        | 5     |
| 10 | 1077.63 | 539.32 | 1060.6  | 530.81 | 1059.62 | 530.31 | I   | 486.36  | 243.69 | 469.34  | 235.17 |         |        | 4     |
| 11 | 1190.71 | 595.86 | 1173.69 | 587.35 | 1172.7  | 586.86 | L   | 373.28  | 187.14 | 356.25  | 178.63 |         |        | 3     |
| 12 | 1303.8  | 652.4  | 1286.77 | 643.89 | 1285.79 | 643.4  | L   | 260.2   | 130.6  | 243.17  | 122.09 |         |        | 2     |
| 13 |         |        |         |        |         |        | K   | 147.11  | 74.06  | 130.09  | 65.55  |         |        | 1     |

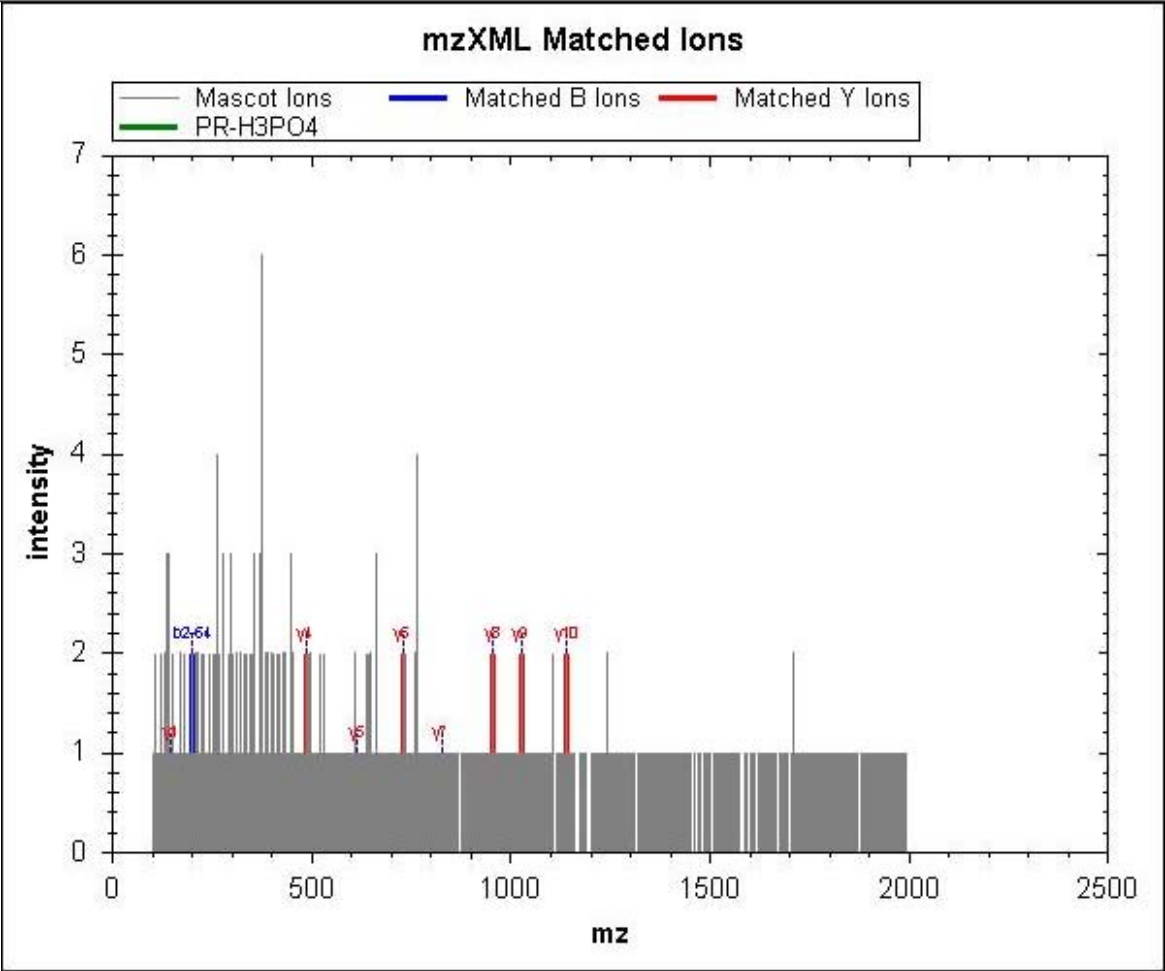

Protein index=1314, ACC No:IPI00328257

Peptide index=6964 MS/MS spectrum

Sequence: LAPPLVTLLSAEPELQYVALR, m/z:1147.165, charge:+ 2, Modification: , Mod Position:

Score: 38.64, Raw data:WET\_B2\_090616\_01.mzxml, MS/MS Elution time: 102.3808, Scan number:5722, Mass delta:0.0068, Rank:1

| No | b       | b++     | b*      | b*++    | b0      | b0++   | Seq | y       | y++     | y*      | y*++    | y0      | y0++    | RevNo |
|----|---------|---------|---------|---------|---------|--------|-----|---------|---------|---------|---------|---------|---------|-------|
| 1  | 114.09  | 57.55   |         |         |         |        | L   |         |         |         |         |         |         | 21    |
| 2  | 185.13  | 93.07   |         |         |         |        | A   | 2180.23 | 1090.62 | 2163.21 | 1082.11 | 2162.22 | 1081.61 | 20    |
| 3  | 282.18  | 141.59  |         |         |         |        | P   | 2109.2  | 1055.1  | 2092.17 | 1046.59 | 2091.19 | 1046.1  | 19    |
| 4  | 379.23  | 190.12  |         |         |         |        | P   | 2012.14 | 1006.58 | 1995.12 | 998.06  | 1994.13 | 997.57  | 18    |
| 5  | 492.32  | 246.66  |         |         |         |        | L   | 1915.09 | 958.05  | 1898.06 | 949.54  | 1897.08 | 949.04  | 17    |
| 6  | 591.39  | 296.2   |         |         |         |        | V   | 1802.01 | 901.51  | 1784.98 | 892.99  | 1784    | 892.5   | 16    |
| 7  | 692.43  | 346.72  |         |         | 674.42  | 337.72 | T   | 1702.94 | 851.97  | 1685.91 | 843.46  | 1684.93 | 842.97  | 15    |
| 8  | 805.52  | 403.26  |         |         | 787.51  | 394.26 | L   | 1601.89 | 801.45  | 1584.86 | 792.94  | 1583.88 | 792.44  | 14    |
| 9  | 918.6   | 459.8   |         |         | 900.59  | 450.8  | L   | 1488.81 | 744.91  | 1471.78 | 736.39  | 1470.8  | 735.9   | 13    |
| 10 | 1005.63 | 503.32  |         |         | 987.62  | 494.32 | S   | 1375.72 | 688.36  | 1358.7  | 679.85  | 1357.71 | 679.36  | 12    |
| 11 | 1076.67 | 538.84  |         |         | 1058.66 | 529.83 | A   | 1288.69 | 644.85  | 1271.66 | 636.34  | 1270.68 | 635.84  | 11    |
| 12 | 1205.71 | 603.36  |         |         | 1187.7  | 594.36 | E   | 1217.65 | 609.33  | 1200.63 | 600.82  | 1199.64 | 600.32  | 10    |
| 13 | 1302.77 | 651.89  |         |         | 1284.76 | 642.88 | P   | 1088.61 | 544.81  | 1071.58 | 536.3   | 1070.6  | 535.8   | 9     |
| 14 | 1431.81 | 716.41  |         |         | 1413.8  | 707.4  | E   | 991.56  | 496.28  | 974.53  | 487.77  | 973.55  | 487.28  | 8     |
| 15 | 1544.89 | 772.95  |         |         | 1526.88 | 763.95 | L   | 862.51  | 431.76  | 845.49  | 423.25  |         |         | 7     |
| 16 | 1672.95 | 836.98  | 1655.93 | 828.47  | 1654.94 | 827.97 | Q   | 749.43  | 375.22  | 732.4   | 366.71  |         |         | 6     |
| 17 | 1836.02 | 918.51  | 1818.99 | 910     | 1818    | 909.51 | Y   | 621.37  | 311.19  | 604.35  | 302.68  |         |         | 5     |
| 18 | 1935.08 | 968.05  | 1918.06 | 959.53  | 1917.07 | 959.04 | V   | 458.31  | 229.66  | 441.28  | 221.14  |         |         | 4     |
| 19 | 2006.12 | 1003.56 | 1989.09 | 995.05  | 1988.11 | 994.56 | A   | 359.24  | 180.12  | 342.21  | 171.61  |         |         | 3     |
| 20 | 2119.21 | 1060.11 | 2102.18 | 1051.59 | 2101.19 | 1051.1 | L   | 288.2   | 144.61  | 271.18  | 136.09  |         |         | 2     |
| 21 |         |         |         |         |         |        | R   | 175.12  | 88.06   | 158.09  | 79.55   |         |         | 1     |

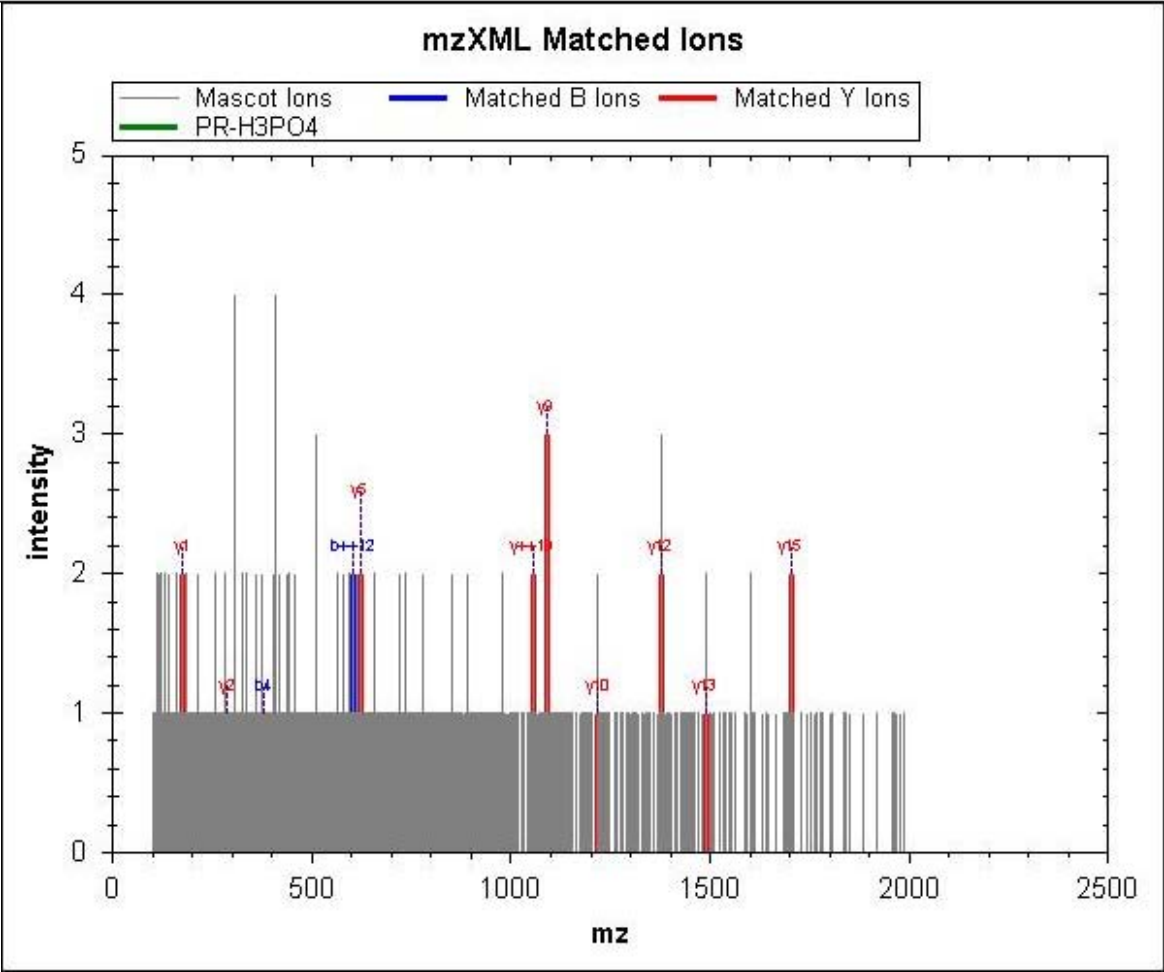

Protein index=1315, ACC No: IPI00247063

Peptide index=5496 MS/MS spectrum

Sequence: FIMDLVSSLSR, m/z:634.3441, charge:+ 2, Modification: , Mod Position:

Score: 32.66, Raw data:WET\_B2\_090616\_01.mzxml, MS/MS Elution time: 74.27983, Scan number:4078, Mass delta:0.0094, Rank:1

| No | b       | b++    | b0      | b0++   | Seq | y       | y++    | y*      | y*++   | y0      | y0++   | RevNo |
|----|---------|--------|---------|--------|-----|---------|--------|---------|--------|---------|--------|-------|
| 1  | 148.08  | 74.54  |         |        | F   |         |        |         |        |         |        | 11    |
| 2  | 261.16  | 131.08 |         |        | I   | 1120.6  | 560.81 | 1103.58 | 552.29 | 1102.59 | 551.8  | 10    |
| 3  | 392.2   | 196.6  |         |        | M   | 1007.52 | 504.26 | 990.49  | 495.75 | 989.51  | 495.26 | 9     |
| 4  | 507.23  | 254.12 | 489.22  | 245.11 | D   | 876.48  | 438.74 | 859.45  | 430.23 | 858.47  | 429.74 | 8     |
| 5  | 620.31  | 310.66 | 602.3   | 301.65 | L   | 761.45  | 381.23 | 744.42  | 372.72 | 743.44  | 372.22 | 7     |
| 6  | 719.38  | 360.19 | 701.37  | 351.19 | V   | 648.37  | 324.69 | 631.34  | 316.17 | 630.36  | 315.68 | 6     |
| 7  | 806.41  | 403.71 | 788.4   | 394.7  | S   | 549.3   | 275.15 | 532.27  | 266.64 | 531.29  | 266.15 | 5     |
| 8  | 893.44  | 447.23 | 875.43  | 438.22 | S   | 462.27  | 231.64 | 445.24  | 223.12 | 444.26  | 222.63 | 4     |
| 9  | 1006.53 | 503.77 | 988.52  | 494.76 | L   | 375.24  | 188.12 | 358.21  | 179.61 | 357.22  | 179.12 | 3     |
| 10 | 1093.56 | 547.28 | 1075.55 | 538.28 | S   | 262.15  | 131.58 | 245.12  | 123.07 | 244.14  | 122.57 | 2     |
| 11 |         |        |         |        | R   | 175.12  | 88.06  | 158.09  | 79.55  |         |        | 1     |

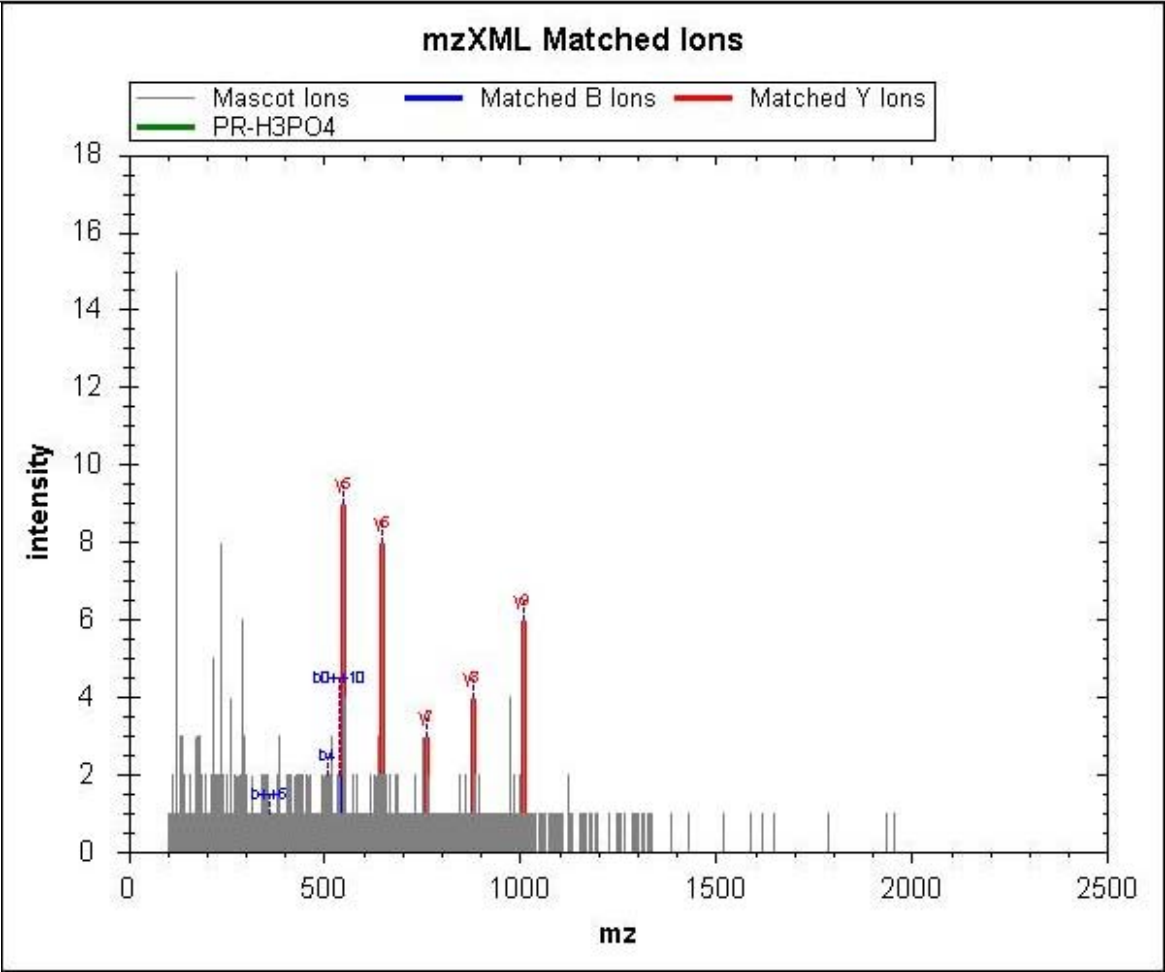

Protein index=1319, ACC No: IPI00395347

Peptide index=6259 MS/MS spectrum

Sequence: LTTDPDLILEVLR, m/z:749.4223, charge:+ 2, Modification: , Mod Position:

Score: 74.08, Raw data:WET\_B2\_090616\_01.mzxml, MS/MS Elution time: 84.81917, Scan number:4690, Mass delta:-0.015, Rank:1

| No | b       | b++    | b0      | b0++   | Seq | y       | y++    | y*      | y*++   | y0      | y0++   | RevNo |
|----|---------|--------|---------|--------|-----|---------|--------|---------|--------|---------|--------|-------|
| 1  | 114.09  | 57.55  |         |        | L   |         |        |         |        |         |        | 13    |
| 2  | 215.14  | 108.07 | 197.13  | 99.07  | T   | 1384.77 | 692.89 | 1367.74 | 684.37 | 1366.76 | 683.88 | 12    |
| 3  | 316.19  | 158.6  | 298.18  | 149.59 | T   | 1283.72 | 642.36 | 1266.69 | 633.85 | 1265.71 | 633.36 | 11    |
| 4  | 431.21  | 216.11 | 413.2   | 207.11 | D   | 1182.67 | 591.84 | 1165.65 | 583.33 | 1164.66 | 582.83 | 10    |
| 5  | 528.27  | 264.64 | 510.26  | 255.63 | P   | 1067.65 | 534.33 | 1050.62 | 525.81 | 1049.64 | 525.32 | 9     |
| 6  | 643.29  | 322.15 | 625.28  | 313.15 | D   | 970.59  | 485.8  | 953.57  | 477.29 | 952.58  | 476.79 | 8     |
| 7  | 756.38  | 378.69 | 738.37  | 369.69 | L   | 855.57  | 428.29 | 838.54  | 419.77 | 837.56  | 419.28 | 7     |
| 8  | 869.46  | 435.23 | 851.45  | 426.23 | I   | 742.48  | 371.74 | 725.46  | 363.23 | 724.47  | 362.74 | 6     |
| 9  | 982.55  | 491.78 | 964.53  | 482.77 | L   | 629.4   | 315.2  | 612.37  | 306.69 | 611.39  | 306.2  | 5     |
| 10 | 1111.59 | 556.3  | 1093.58 | 547.29 | E   | 516.31  | 258.66 | 499.29  | 250.15 | 498.3   | 249.66 | 4     |
| 11 | 1210.66 | 605.83 | 1192.65 | 596.83 | V   | 387.27  | 194.14 | 370.24  | 185.63 |         |        | 3     |
| 12 | 1323.74 | 662.37 | 1305.73 | 653.37 | L   | 288.2   | 144.61 | 271.18  | 136.09 |         |        | 2     |

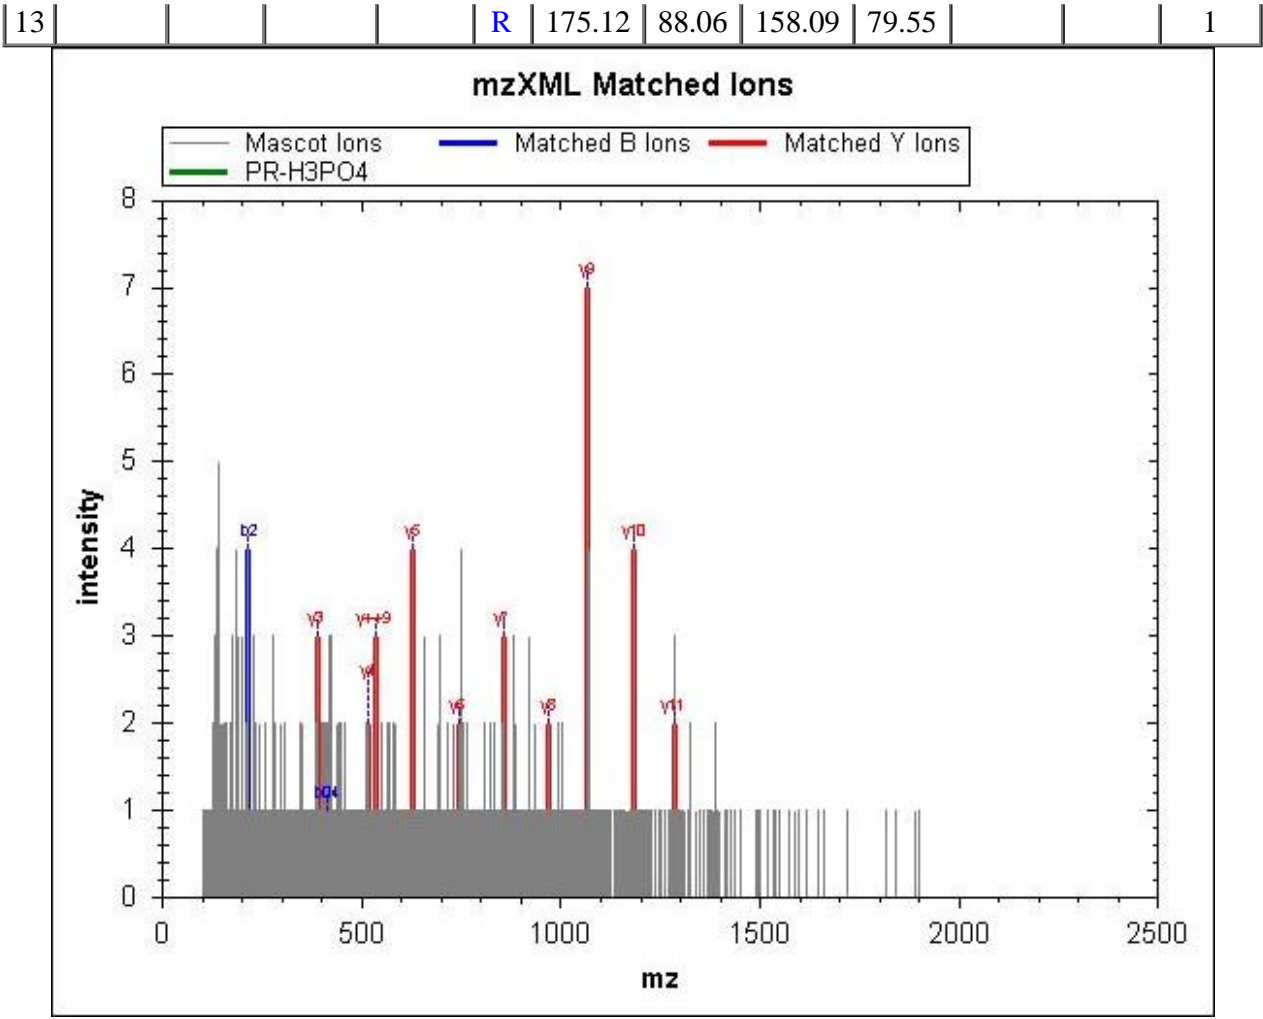

Protein index=1320, ACC No:IP100409671

Peptide index=5678 MS/MS spectrum

Sequence: VVQGDIGEANEDVTQIVEILHSGPSK, m/z:912.1348, charge:+ 3, Modification: , Mod Position:

Score: 58.65, Raw data:WET\_B2\_090616\_02.mzxml, MS/MS Elution time: 76.86266, Scan number:4262, Mass delta:-0.0067, Rank:1

| No | b      | b++    | b*     | b*++   | b0     | b0++   | Seq | y       | y++     | y*      | y*++    | y0      | y0++    | RevNo |
|----|--------|--------|--------|--------|--------|--------|-----|---------|---------|---------|---------|---------|---------|-------|
| 1  | 100.08 | 50.54  |        |        |        |        | V   |         |         |         |         |         |         | 26    |
| 2  | 199.14 | 100.08 |        |        |        |        | V   | 2635.32 | 1318.16 | 2618.29 | 1309.65 | 2617.31 | 1309.16 | 25    |
| 3  | 327.2  | 164.1  | 310.18 | 155.59 |        |        | Q   | 2536.25 | 1268.63 | 2519.23 | 1260.12 | 2518.24 | 1259.62 | 24    |
| 4  | 384.22 | 192.62 | 367.2  | 184.1  |        |        | G   | 2408.19 | 1204.6  | 2391.17 | 1196.09 | 2390.18 | 1195.6  | 23    |
| 5  | 499.25 | 250.13 | 482.22 | 241.62 | 481.24 | 241.12 | D   | 2351.17 | 1176.09 | 2334.15 | 1167.58 | 2333.16 | 1167.08 | 22    |
| 6  | 612.34 | 306.67 | 595.31 | 298.16 | 594.32 | 297.67 | I   | 2236.15 | 1118.58 | 2219.12 | 1110.06 | 2218.14 | 1109.57 | 21    |
| 7  | 669.36 | 335.18 | 652.33 | 326.67 | 651.35 | 326.18 | G   | 2123.06 | 1062.03 | 2106.03 | 1053.52 | 2105.05 | 1053.03 | 20    |
| 8  | 798.4  | 399.7  | 781.37 | 391.19 | 780.39 | 390.7  | E   | 2066.04 | 1033.52 | 2049.01 | 1025.01 | 2048.03 | 1024.52 | 19    |
| 9  | 869.44 | 435.22 | 852.41 | 426.71 | 851.43 | 426.22 | A   | 1937    | 969     | 1919.97 | 960.49  | 1918.99 | 960     | 18    |
| 10 | 983.48 | 492.24 | 966.45 | 483.73 | 965.47 | 483.24 | N   | 1865.96 | 933.48  | 1848.93 | 924.97  | 1847.95 | 924.48  | 17    |

|    |         |         |         |         |         |         |   |         |        |         |        |         |        |    |
|----|---------|---------|---------|---------|---------|---------|---|---------|--------|---------|--------|---------|--------|----|
| 11 | 1112.52 | 556.76  | 1095.5  | 548.25  | 1094.51 | 547.76  | E | 1751.92 | 876.46 | 1734.89 | 867.95 | 1733.91 | 867.46 | 16 |
| 12 | 1227.55 | 614.28  | 1210.52 | 605.76  | 1209.54 | 605.27  | D | 1622.87 | 811.94 | 1605.85 | 803.43 | 1604.86 | 802.94 | 15 |
| 13 | 1326.62 | 663.81  | 1309.59 | 655.3   | 1308.61 | 654.81  | V | 1507.85 | 754.43 | 1490.82 | 745.91 | 1489.84 | 745.42 | 14 |
| 14 | 1427.66 | 714.34  | 1410.64 | 705.82  | 1409.65 | 705.33  | T | 1408.78 | 704.89 | 1391.75 | 696.38 | 1390.77 | 695.89 | 13 |
| 15 | 1555.72 | 778.37  | 1538.7  | 769.85  | 1537.71 | 769.36  | Q | 1307.73 | 654.37 | 1290.71 | 645.86 | 1289.72 | 645.36 | 12 |
| 16 | 1668.81 | 834.91  | 1651.78 | 826.39  | 1650.8  | 825.9   | I | 1179.67 | 590.34 | 1162.65 | 581.83 | 1161.66 | 581.33 | 11 |
| 17 | 1767.88 | 884.44  | 1750.85 | 875.93  | 1749.87 | 875.44  | V | 1066.59 | 533.8  | 1049.56 | 525.28 | 1048.58 | 524.79 | 10 |
| 18 | 1896.92 | 948.96  | 1879.89 | 940.45  | 1878.91 | 939.96  | E | 967.52  | 484.26 | 950.49  | 475.75 | 949.51  | 475.26 | 9  |
| 19 | 2010    | 1005.51 | 1992.98 | 996.99  | 1991.99 | 996.5   | I | 838.48  | 419.74 | 821.45  | 411.23 | 820.47  | 410.74 | 8  |
| 20 | 2123.09 | 1062.05 | 2106.06 | 1053.53 | 2105.08 | 1053.04 | L | 725.39  | 363.2  | 708.37  | 354.69 | 707.38  | 354.2  | 7  |
| 21 | 2260.15 | 1130.58 | 2243.12 | 1122.06 | 2242.14 | 1121.57 | H | 612.31  | 306.66 | 595.28  | 298.15 | 594.3   | 297.65 | 6  |
| 22 | 2347.18 | 1174.09 | 2330.15 | 1165.58 | 2329.17 | 1165.09 | S | 475.25  | 238.13 | 458.22  | 229.62 | 457.24  | 229.12 | 5  |
| 23 | 2404.2  | 1202.6  | 2387.17 | 1194.09 | 2386.19 | 1193.6  | G | 388.22  | 194.61 | 371.19  | 186.1  | 370.21  | 185.61 | 4  |
| 24 | 2501.25 | 1251.13 | 2484.23 | 1242.62 | 2483.24 | 1242.12 | P | 331.2   | 166.1  | 314.17  | 157.59 | 313.19  | 157.1  | 3  |
| 25 | 2588.28 | 1294.65 | 2571.26 | 1286.13 | 2570.27 | 1285.64 | S | 234.14  | 117.58 | 217.12  | 109.06 | 216.13  | 108.57 | 2  |
| 26 |         |         |         |         |         |         | K | 147.11  | 74.06  | 130.09  | 65.55  |         |        | 1  |

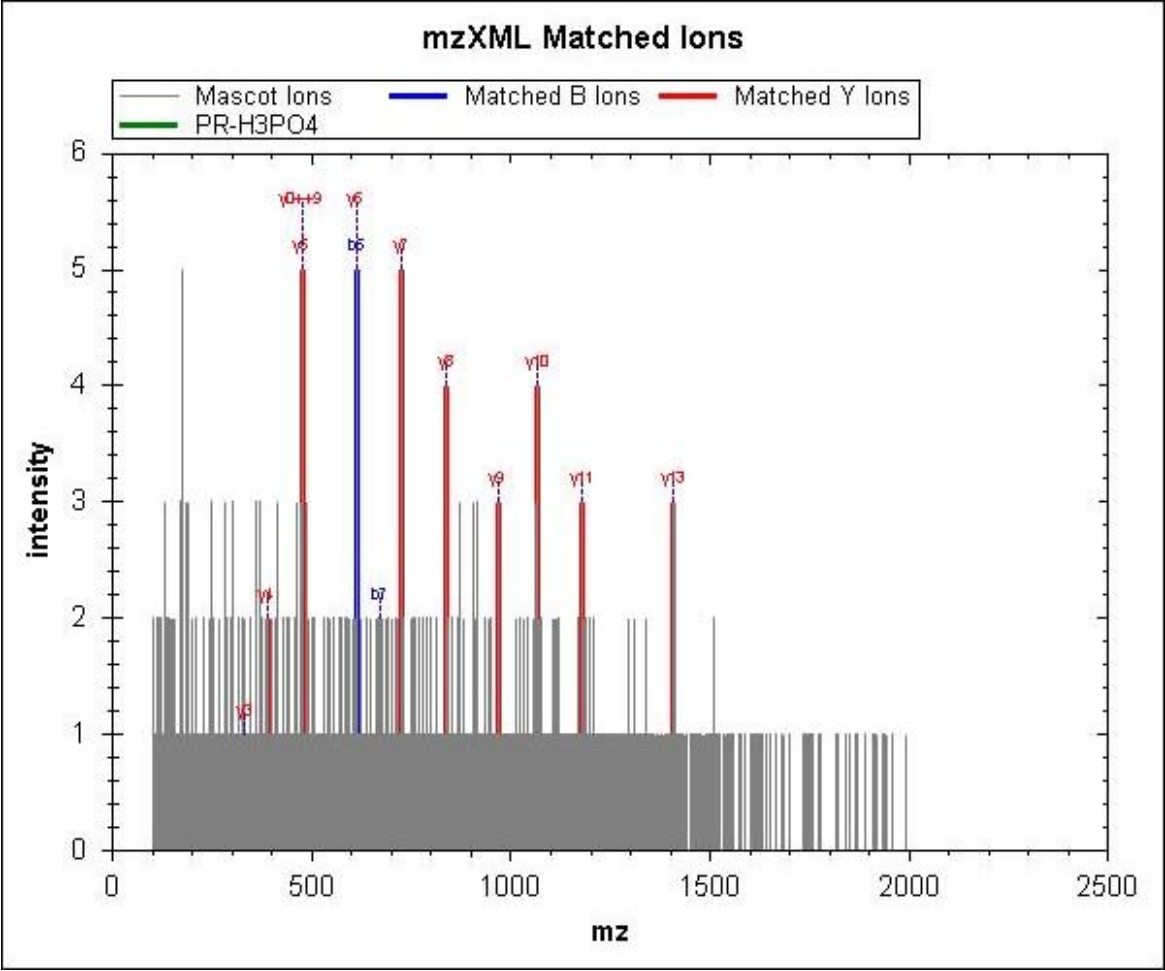

Protein index=1321, ACC No:IP100102752

Peptide index=6925 MS/MS spectrum

Sequence: LWVGGLGPWVPLAALAR, m/z:888.5201, charge:+ 2, Modification: , Mod Position:

Score: 43.73, Raw data:WET\_B2\_090616\_03.mzxml, MS/MS Elution time: 100.3913, Scan number:5605, Mass delta:-0.0015, Rank:1

| No | b       | b++    | Seq | y       | y++    | y*      | y*++   | RevNo |
|----|---------|--------|-----|---------|--------|---------|--------|-------|
| 1  | 114.09  | 57.55  | L   |         |        |         |        | 17    |
| 2  | 300.17  | 150.59 | W   | 1662.95 | 831.98 | 1645.92 | 823.46 | 16    |
| 3  | 399.24  | 200.12 | V   | 1476.87 | 738.94 | 1459.84 | 730.42 | 15    |
| 4  | 456.26  | 228.63 | G   | 1377.8  | 689.4  | 1360.77 | 680.89 | 14    |
| 5  | 513.28  | 257.14 | G   | 1320.78 | 660.89 | 1303.75 | 652.38 | 13    |
| 6  | 626.37  | 313.69 | L   | 1263.76 | 632.38 | 1246.73 | 623.87 | 12    |
| 7  | 683.39  | 342.2  | G   | 1150.67 | 575.84 | 1133.65 | 567.33 | 11    |
| 8  | 780.44  | 390.72 | P   | 1093.65 | 547.33 | 1076.63 | 538.82 | 10    |
| 9  | 966.52  | 483.76 | W   | 996.6   | 498.8  | 979.57  | 490.29 | 9     |
| 10 | 1065.59 | 533.3  | V   | 810.52  | 405.76 | 793.49  | 397.25 | 8     |
| 11 | 1162.64 | 581.82 | P   | 711.45  | 356.23 | 694.42  | 347.72 | 7     |
| 12 | 1275.72 | 638.37 | L   | 614.4   | 307.7  | 597.37  | 299.19 | 6     |
| 13 | 1346.76 | 673.88 | A   | 501.31  | 251.16 | 484.29  | 242.65 | 5     |
| 14 | 1417.8  | 709.4  | A   | 430.28  | 215.64 | 413.25  | 207.13 | 4     |
| 15 | 1530.88 | 765.95 | L   | 359.24  | 180.12 | 342.21  | 171.61 | 3     |
| 16 | 1601.92 | 801.46 | A   | 246.16  | 123.58 | 229.13  | 115.07 | 2     |
| 17 |         |        | R   | 175.12  | 88.06  | 158.09  | 79.55  | 1     |

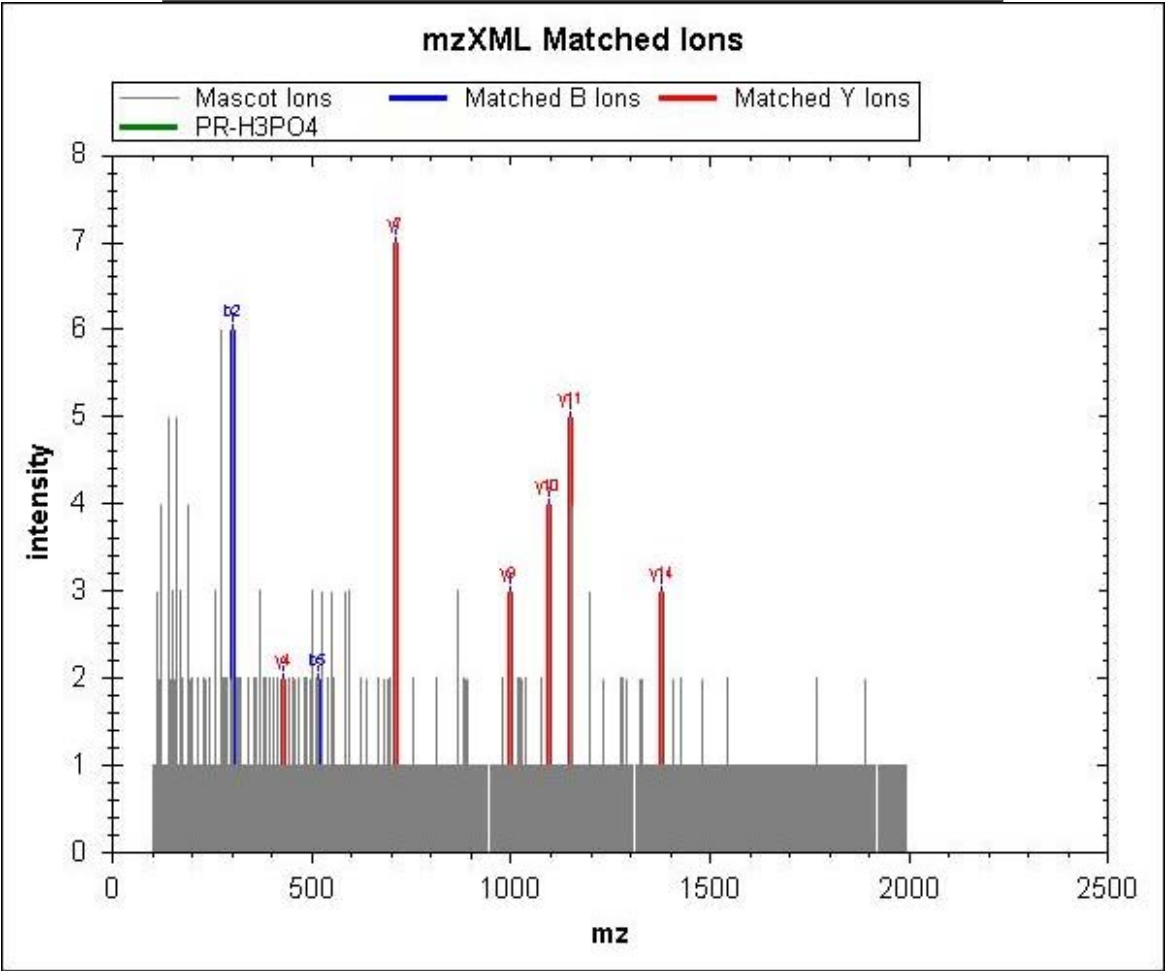

Protein index=1323, ACC No: IPI00011578

Peptide index=2405 MS/MS spectrum

Sequence: IVTSEEVIIR, m/z: 579.836, charge: + 2, Modification: , Mod Position:

Score: 59.8, Raw data: WET\_B2\_090616\_02.mzxml, MS/MS Elution time: 43.82483, Scan number: 2327, Mass delta: -0.0082, Rank: 1

| No | b      | b++    | b0     | b0++   | Seq | y       | y++    | y*      | y*++   | y0      | y0++   | RevNo |
|----|--------|--------|--------|--------|-----|---------|--------|---------|--------|---------|--------|-------|
| 1  | 114.09 | 57.55  |        |        | I   |         |        |         |        |         |        | 10    |
| 2  | 213.16 | 107.08 |        |        | V   | 1045.59 | 523.3  | 1028.56 | 514.78 | 1027.58 | 514.29 | 9     |
| 3  | 314.21 | 157.61 | 296.2  | 148.6  | T   | 946.52  | 473.76 | 929.49  | 465.25 | 928.51  | 464.76 | 8     |
| 4  | 401.24 | 201.12 | 383.23 | 192.12 | S   | 845.47  | 423.24 | 828.45  | 414.73 | 827.46  | 414.23 | 7     |
| 5  | 530.28 | 265.64 | 512.27 | 256.64 | E   | 758.44  | 379.72 | 741.41  | 371.21 | 740.43  | 370.72 | 6     |
| 6  | 659.32 | 330.17 | 641.31 | 321.16 | E   | 629.4   | 315.2  | 612.37  | 306.69 | 611.39  | 306.2  | 5     |
| 7  | 758.39 | 379.7  | 740.38 | 370.69 | V   | 500.36  | 250.68 | 483.33  | 242.17 |         |        | 4     |
| 8  | 871.48 | 436.24 | 853.47 | 427.24 | I   | 401.29  | 201.15 | 384.26  | 192.63 |         |        | 3     |
| 9  | 984.56 | 492.78 | 966.55 | 483.78 | I   | 288.2   | 144.61 | 271.18  | 136.09 |         |        | 2     |
| 10 |        |        |        |        | R   | 175.12  | 88.06  | 158.09  | 79.55  |         |        | 1     |

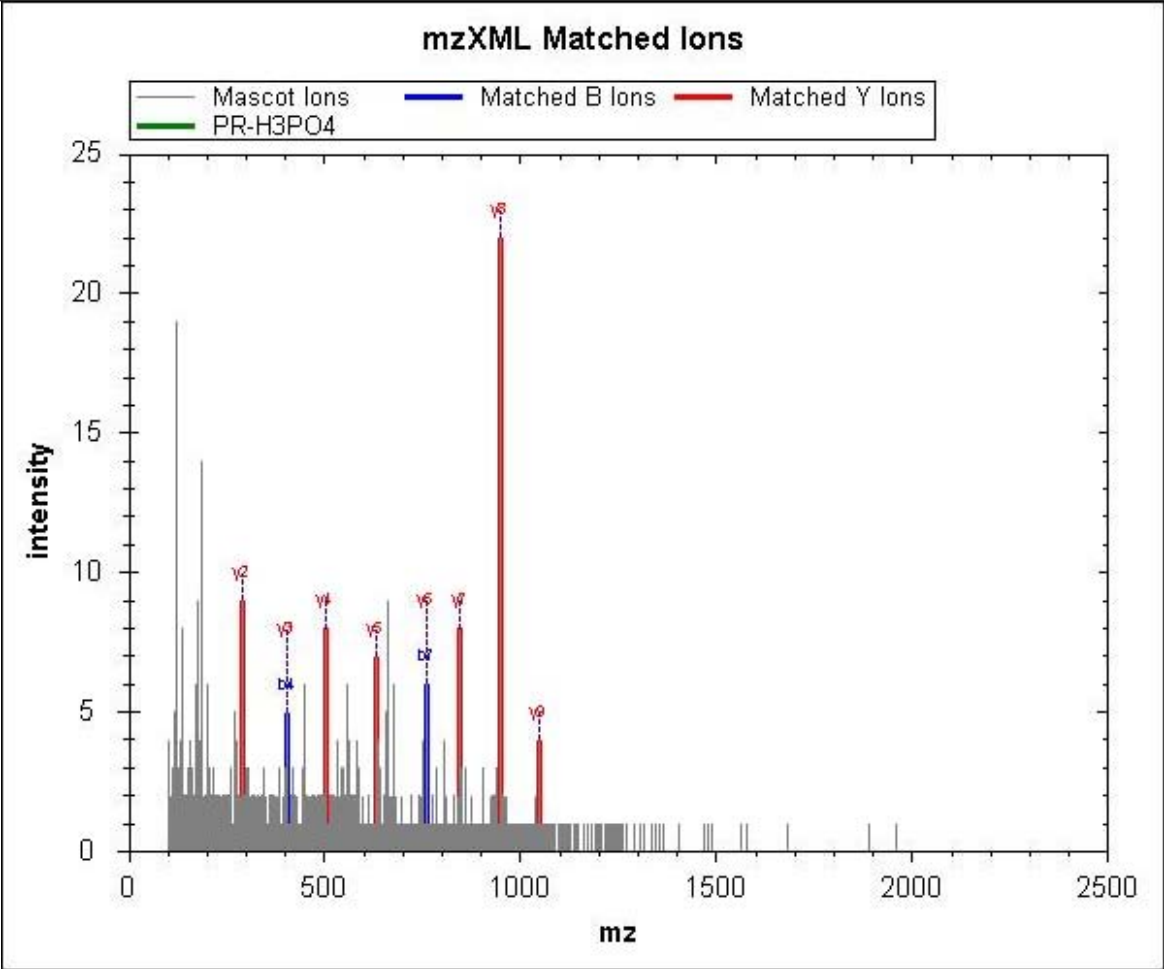

Protein index=1324, ACC No: IPI00015102

Peptide index=3801 MS/MS spectrum

Sequence: ALFLETEQLK, m/z:596.3341, charge:+ 2, Modification: , Mod Position:

Score: 44.53, Raw data:WET\_B2\_090616\_03.mzxml, MS/MS Elution time: 55.959, Scan number:3016, Mass delta:-0.0028, Rank:1

| No | b       | b++    | b*      | b*++   | b0      | b0++   | Seq | y       | y++    | y*     | y*++   | y0      | y0++   | RevNo |
|----|---------|--------|---------|--------|---------|--------|-----|---------|--------|--------|--------|---------|--------|-------|
| 1  | 72.04   | 36.53  |         |        |         |        | A   |         |        |        |        |         |        | 10    |
| 2  | 185.13  | 93.07  |         |        |         |        | L   | 1120.62 | 560.82 | 1103.6 | 552.3  | 1102.61 | 551.81 | 9     |
| 3  | 332.2   | 166.6  |         |        |         |        | F   | 1007.54 | 504.27 | 990.51 | 495.76 | 989.53  | 495.27 | 8     |
| 4  | 445.28  | 223.14 |         |        |         |        | L   | 860.47  | 430.74 | 843.45 | 422.23 | 842.46  | 421.73 | 7     |
| 5  | 574.32  | 287.67 |         |        | 556.31  | 278.66 | E   | 747.39  | 374.2  | 730.36 | 365.68 | 729.38  | 365.19 | 6     |
| 6  | 675.37  | 338.19 |         |        | 657.36  | 329.18 | T   | 618.35  | 309.68 | 601.32 | 301.16 | 600.34  | 300.67 | 5     |
| 7  | 804.41  | 402.71 |         |        | 786.4   | 393.71 | E   | 517.3   | 259.15 | 500.27 | 250.64 | 499.29  | 250.15 | 4     |
| 8  | 932.47  | 466.74 | 915.45  | 458.23 | 914.46  | 457.73 | Q   | 388.26  | 194.63 | 371.23 | 186.12 |         |        | 3     |
| 9  | 1045.56 | 523.28 | 1028.53 | 514.77 | 1027.55 | 514.28 | L   | 260.2   | 130.6  | 243.17 | 122.09 |         |        | 2     |
| 10 |         |        |         |        |         |        | K   | 147.11  | 74.06  | 130.09 | 65.55  |         |        | 1     |

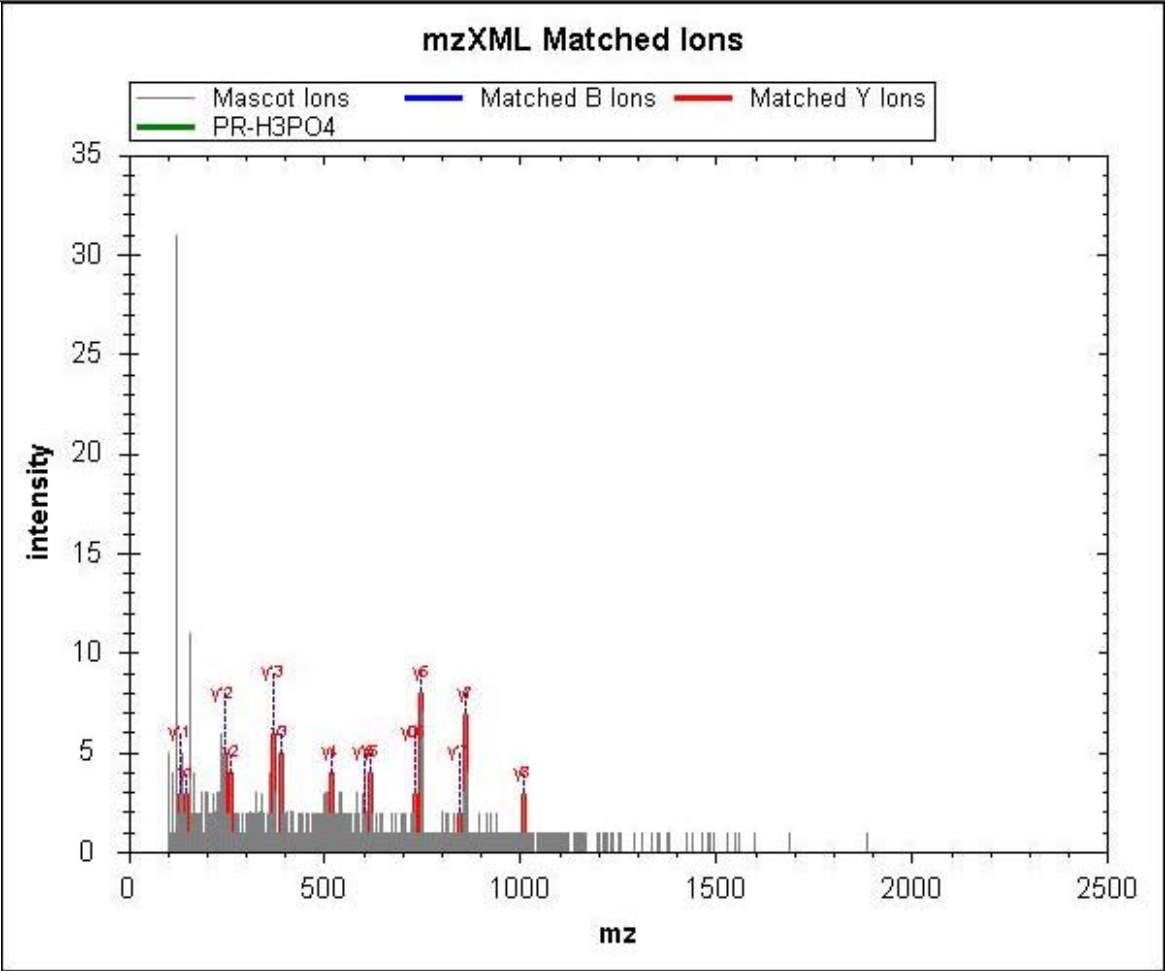

Protein index=1325, ACC No:IPI00015808

Peptide index=2419 MS/MS spectrum

Sequence: IIKPLQYQSTVASGTVAR, m/z:644.7001, charge:+ 3, Modification: , Mod Position:

Score: 46.11, Raw data:WET\_B2\_090616\_02.mzxml, MS/MS Elution time: 43.98833, Scan number:2337, Mass delta:-0.0055, Rank:1

| No | b       | b++    | b*      | b*++   | b0      | b0++   | Seq | y       | y++    | y*      | y*++   | y0      | y0++   | RevNo |
|----|---------|--------|---------|--------|---------|--------|-----|---------|--------|---------|--------|---------|--------|-------|
| 1  | 114.09  | 57.55  |         |        |         |        | I   |         |        |         |        |         |        | 18    |
| 2  | 227.18  | 114.09 |         |        |         |        | I   | 1819.01 | 910.01 | 1801.98 | 901.49 | 1801    | 901    | 17    |
| 3  | 355.27  | 178.14 | 338.24  | 169.63 |         |        | K   | 1705.92 | 853.47 | 1688.9  | 844.95 | 1687.91 | 844.46 | 16    |
| 4  | 452.32  | 226.67 | 435.3   | 218.15 |         |        | P   | 1577.83 | 789.42 | 1560.8  | 780.9  | 1559.82 | 780.41 | 15    |
| 5  | 565.41  | 283.21 | 548.38  | 274.69 |         |        | L   | 1480.78 | 740.89 | 1463.75 | 732.38 | 1462.76 | 731.89 | 14    |
| 6  | 693.47  | 347.24 | 676.44  | 338.72 |         |        | Q   | 1367.69 | 684.35 | 1350.66 | 675.84 | 1349.68 | 675.34 | 13    |
| 7  | 856.53  | 428.77 | 839.5   | 420.25 |         |        | Y   | 1239.63 | 620.32 | 1222.61 | 611.81 | 1221.62 | 611.31 | 12    |
| 8  | 984.59  | 492.8  | 967.56  | 484.28 |         |        | Q   | 1076.57 | 538.79 | 1059.54 | 530.28 | 1058.56 | 529.78 | 11    |
| 9  | 1071.62 | 536.31 | 1054.59 | 527.8  | 1053.61 | 527.31 | S   | 948.51  | 474.76 | 931.48  | 466.25 | 930.5   | 465.75 | 10    |
| 10 | 1172.67 | 586.84 | 1155.64 | 578.32 | 1154.66 | 577.83 | T   | 861.48  | 431.24 | 844.45  | 422.73 | 843.47  | 422.24 | 9     |
| 11 | 1271.74 | 636.37 | 1254.71 | 627.86 | 1253.73 | 627.37 | V   | 760.43  | 380.72 | 743.4   | 372.21 | 742.42  | 371.71 | 8     |
| 12 | 1342.77 | 671.89 | 1325.75 | 663.38 | 1324.76 | 662.88 | A   | 661.36  | 331.18 | 644.34  | 322.67 | 643.35  | 322.18 | 7     |
| 13 | 1429.8  | 715.41 | 1412.78 | 706.89 | 1411.79 | 706.4  | S   | 590.33  | 295.67 | 573.3   | 287.15 | 572.32  | 286.66 | 6     |
| 14 | 1486.83 | 743.92 | 1469.8  | 735.4  | 1468.82 | 734.91 | G   | 503.29  | 252.15 | 486.27  | 243.64 | 485.28  | 243.15 | 5     |
| 15 | 1587.87 | 794.44 | 1570.85 | 785.93 | 1569.86 | 785.44 | T   | 446.27  | 223.64 | 429.25  | 215.13 | 428.26  | 214.63 | 4     |
| 16 | 1686.94 | 843.97 | 1669.92 | 835.46 | 1668.93 | 834.97 | V   | 345.22  | 173.12 | 328.2   | 164.6  |         |        | 3     |
| 17 | 1757.98 | 879.49 | 1740.95 | 870.98 | 1739.97 | 870.49 | A   | 246.16  | 123.58 | 229.13  | 115.07 |         |        | 2     |
| 18 |         |        |         |        |         |        | R   | 175.12  | 88.06  | 158.09  | 79.55  |         |        | 1     |

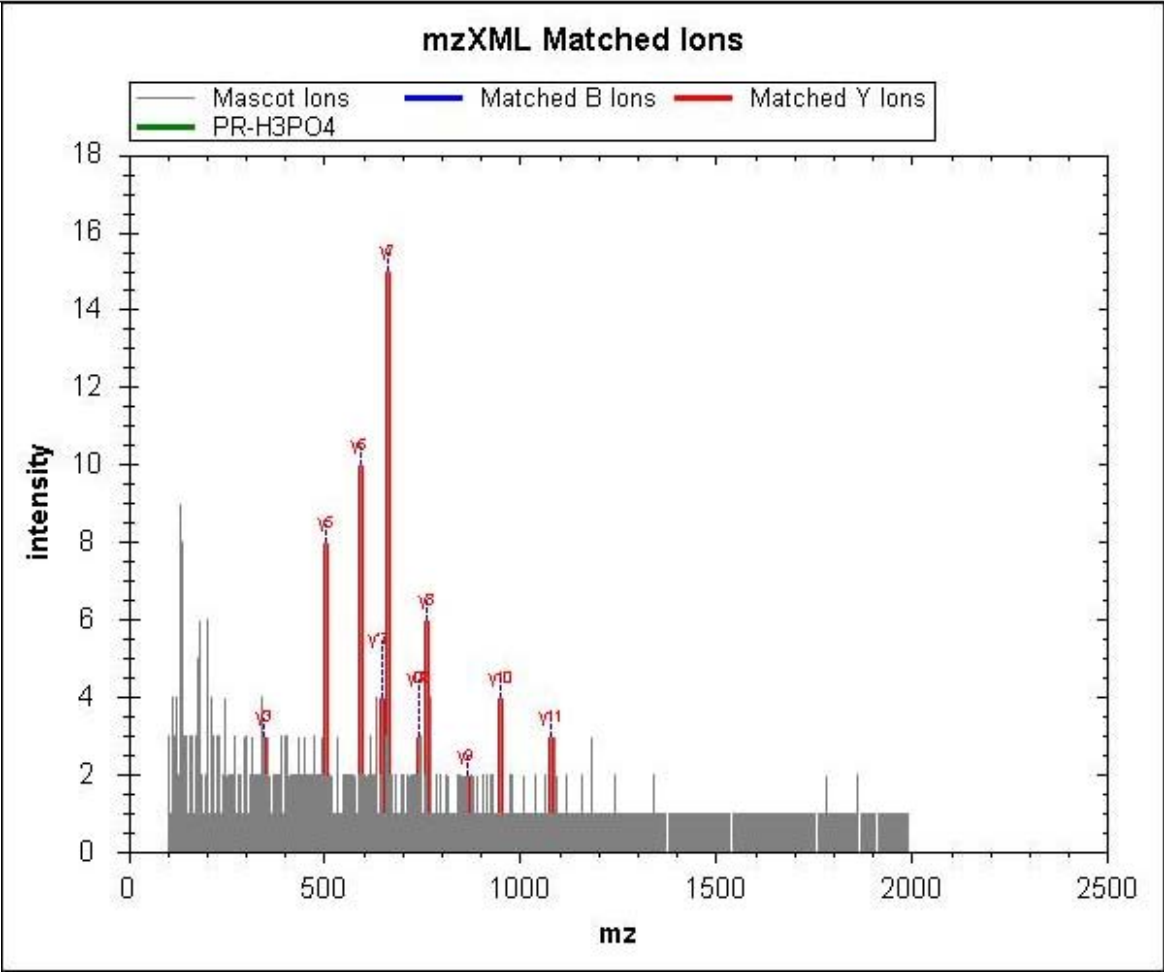

Protein index=1326, ACC No: IPI00024900

Peptide index=257 MS/MS spectrum

Sequence: RLVELAR, m/z:428.7788, charge:+ 2, Modification: , Mod Position:

Score: 33.59, Raw data:WET\_B2\_090616\_02.mzxml, MS/MS Elution time: 17.43483, Scan number:782, Mass delta:0.0139, Rank:1

| No | b      | b++    | b*     | b*++   | b0     | b0++   | Seq | y      | y++    | y*     | y*++   | y0     | y0++   | RevNo |
|----|--------|--------|--------|--------|--------|--------|-----|--------|--------|--------|--------|--------|--------|-------|
| 1  | 157.11 | 79.06  | 140.08 | 70.54  |        |        | R   |        |        |        |        |        |        | 7     |
| 2  | 270.19 | 135.6  | 253.17 | 127.09 |        |        | L   | 700.44 | 350.72 | 683.41 | 342.21 | 682.42 | 341.72 | 6     |
| 3  | 369.26 | 185.13 | 352.23 | 176.62 |        |        | V   | 587.35 | 294.18 | 570.32 | 285.67 | 569.34 | 285.17 | 5     |
| 4  | 498.3  | 249.66 | 481.28 | 241.14 | 480.29 | 240.65 | E   | 488.28 | 244.65 | 471.26 | 236.13 | 470.27 | 235.64 | 4     |
| 5  | 611.39 | 306.2  | 594.36 | 297.68 | 593.38 | 297.19 | L   | 359.24 | 180.12 | 342.21 | 171.61 |        |        | 3     |
| 6  | 682.42 | 341.72 | 665.4  | 333.2  | 664.41 | 332.71 | A   | 246.16 | 123.58 | 229.13 | 115.07 |        |        | 2     |
| 7  |        |        |        |        |        |        | R   | 175.12 | 88.06  | 158.09 | 79.55  |        |        | 1     |

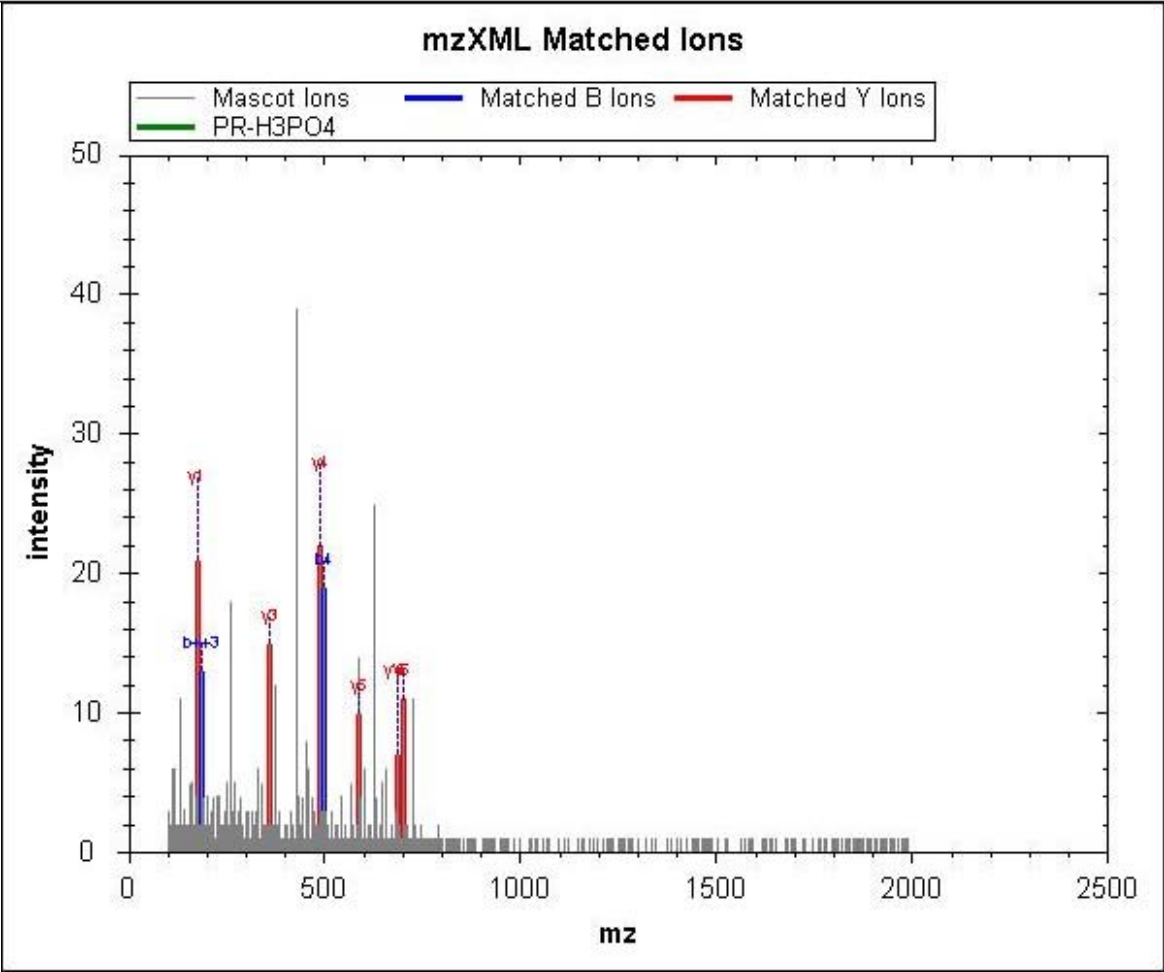

Protein index=1328, ACC No:IPI00021671

Peptide index=667 MS/MS spectrum

Sequence: LPGAGGSLR, m/z:414.2191, charge:+ 2, Modification: , Mod Position:

Score: 32.85, Raw data:WET\_B2\_090616\_02.mzxml, MS/MS Elution time: 22.14967, Scan number:1058, Mass delta:-0.0425, Rank:1

| No | b      | b++    | b0     | b0++   | Seq | y      | y++    | y*     | y*++   | y0     | y0++   | RevNo |
|----|--------|--------|--------|--------|-----|--------|--------|--------|--------|--------|--------|-------|
| 1  | 114.09 | 57.55  |        |        | L   |        |        |        |        |        |        | 9     |
| 2  | 211.14 | 106.08 |        |        | P   | 714.39 | 357.7  | 697.36 | 349.18 | 696.38 | 348.69 | 8     |
| 3  | 268.17 | 134.59 |        |        | G   | 617.34 | 309.17 | 600.31 | 300.66 | 599.33 | 300.17 | 7     |
| 4  | 339.2  | 170.1  |        |        | A   | 560.32 | 280.66 | 543.29 | 272.15 | 542.3  | 271.66 | 6     |
| 5  | 396.22 | 198.62 |        |        | G   | 489.28 | 245.14 | 472.25 | 236.63 | 471.27 | 236.14 | 5     |
| 6  | 453.25 | 227.13 |        |        | G   | 432.26 | 216.63 | 415.23 | 208.12 | 414.25 | 207.63 | 4     |
| 7  | 540.28 | 270.64 | 522.27 | 261.64 | S   | 375.24 | 188.12 | 358.21 | 179.61 | 357.22 | 179.12 | 3     |
| 8  | 653.36 | 327.18 | 635.35 | 318.18 | L   | 288.2  | 144.61 | 271.18 | 136.09 |        |        | 2     |
| 9  |        |        |        |        | R   | 175.12 | 88.06  | 158.09 | 79.55  |        |        | 1     |

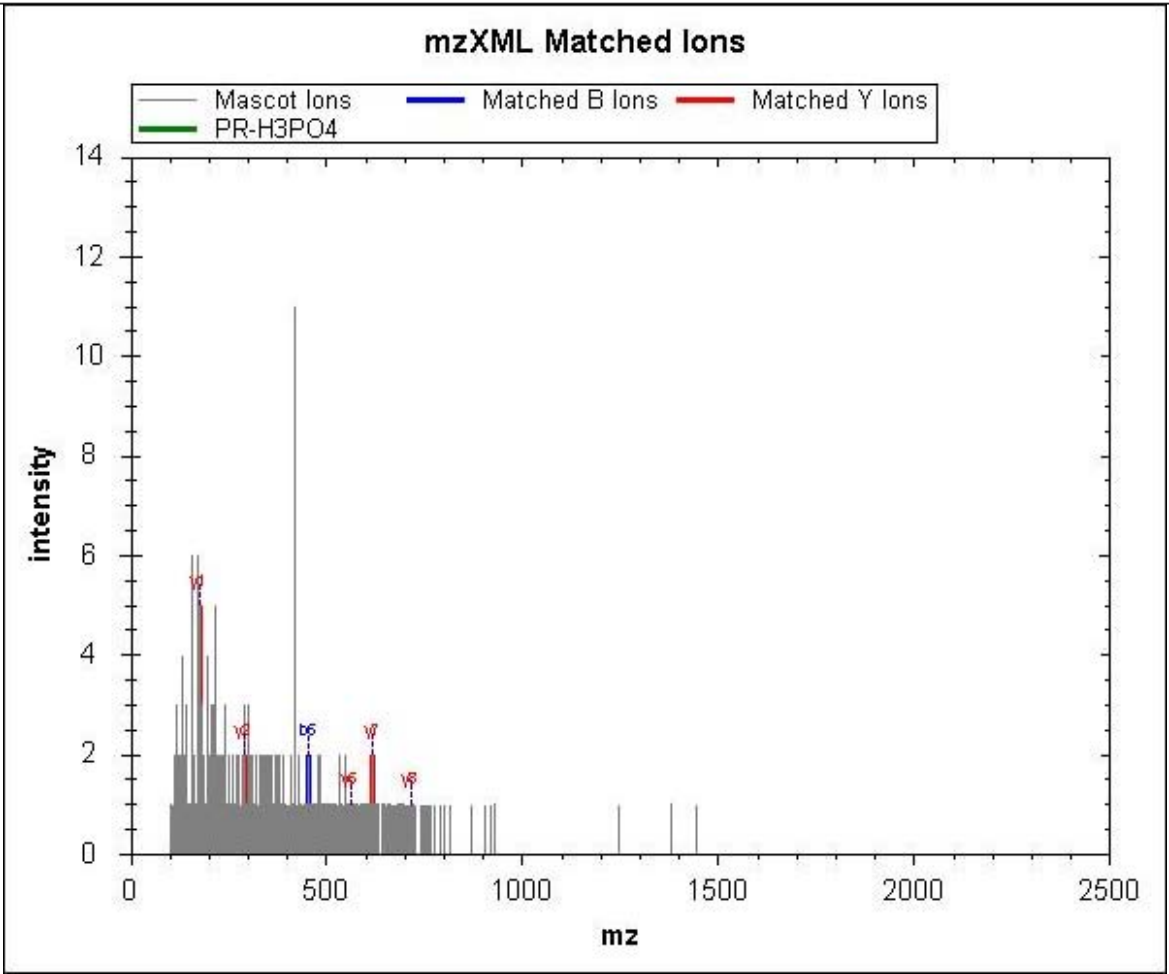

Protein index=1330, ACC No:IPI00385928

Peptide index=5958 MS/MS spectrum

Sequence: TGYGVEELISALQR, m/z:768.4022, charge:+ 2, Modification: , Mod Position:

Score: 41.35, Raw data:WET\_B2\_090616\_02.mzxml, MS/MS Elution time: 80.33233, Scan number:4465, Mass delta:-0.0093, Rank:1

| No | b       | b++    | b* | b*++ | b0      | b0++   | Seq | y       | y++    | y*      | y*++   | y0      | y0++   | RevNo |
|----|---------|--------|----|------|---------|--------|-----|---------|--------|---------|--------|---------|--------|-------|
| 1  | 102.05  | 51.53  |    |      | 84.04   | 42.53  | T   |         |        |         |        |         |        | 14    |
| 2  | 159.08  | 80.04  |    |      | 141.07  | 71.04  | G   | 1434.76 | 717.88 | 1417.73 | 709.37 | 1416.75 | 708.88 | 13    |
| 3  | 322.14  | 161.57 |    |      | 304.13  | 152.57 | Y   | 1377.74 | 689.37 | 1360.71 | 680.86 | 1359.73 | 680.37 | 12    |
| 4  | 379.16  | 190.08 |    |      | 361.15  | 181.08 | G   | 1214.67 | 607.84 | 1197.65 | 599.33 | 1196.66 | 598.84 | 11    |
| 5  | 478.23  | 239.62 |    |      | 460.22  | 230.61 | V   | 1157.65 | 579.33 | 1140.63 | 570.82 | 1139.64 | 570.32 | 10    |
| 6  | 607.27  | 304.14 |    |      | 589.26  | 295.13 | E   | 1058.58 | 529.8  | 1041.56 | 521.28 | 1040.57 | 520.79 | 9     |
| 7  | 736.31  | 368.66 |    |      | 718.3   | 359.66 | E   | 929.54  | 465.27 | 912.51  | 456.76 | 911.53  | 456.27 | 8     |
| 8  | 849.4   | 425.2  |    |      | 831.39  | 416.2  | L   | 800.5   | 400.75 | 783.47  | 392.24 | 782.49  | 391.75 | 7     |
| 9  | 962.48  | 481.75 |    |      | 944.47  | 472.74 | I   | 687.41  | 344.21 | 670.39  | 335.7  | 669.4   | 335.21 | 6     |
| 10 | 1049.51 | 525.26 |    |      | 1031.5  | 516.26 | S   | 574.33  | 287.67 | 557.3   | 279.16 | 556.32  | 278.66 | 5     |
| 11 | 1120.55 | 560.78 |    |      | 1102.54 | 551.77 | A   | 487.3   | 244.15 | 470.27  | 235.64 |         |        | 4     |
| 12 | 1233.64 | 617.32 |    |      | 1215.63 | 608.32 | L   | 416.26  | 208.63 | 399.24  | 200.12 |         |        | 3     |

|    |         |        |         |        |         |        |   |        |        |        |        |  |  |   |
|----|---------|--------|---------|--------|---------|--------|---|--------|--------|--------|--------|--|--|---|
| 13 | 1361.69 | 681.35 | 1344.67 | 672.84 | 1343.68 | 672.35 | Q | 303.18 | 152.09 | 286.15 | 143.58 |  |  | 2 |
| 14 |         |        |         |        |         |        | R | 175.12 | 88.06  | 158.09 | 79.55  |  |  | 1 |

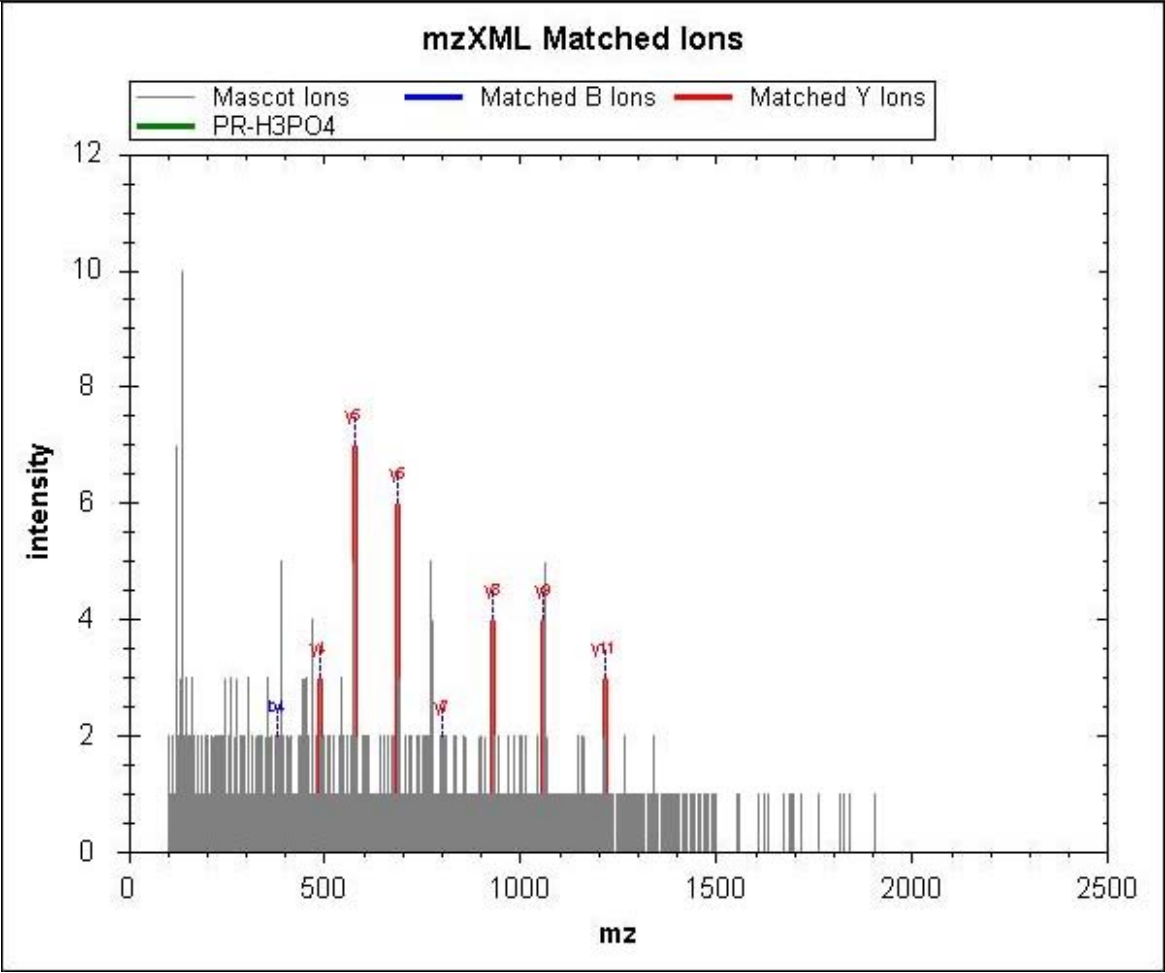

Protein index=1331, ACC No: IPI00025273

Peptide index=6524 MS/MS spectrum

Sequence: VDLGGFAGLFDLK, m/z: 676.3731, charge: + 2, Modification: , Mod Position:

Score: 75.76, Raw data: WET\_B2\_090616\_03.mzxml, MS/MS Elution time: 90.053, Scan number: 4996, Mass delta: 0.0133, Rank: 1

| No | b      | b++    | b0     | b0++   | Seq | y       | y++    | y*      | y*++   | y0      | y0++   | RevNo |
|----|--------|--------|--------|--------|-----|---------|--------|---------|--------|---------|--------|-------|
| 1  | 100.08 | 50.54  |        |        | V   |         |        |         |        |         |        | 13    |
| 2  | 215.1  | 108.05 | 197.09 | 99.05  | D   | 1252.66 | 626.83 | 1235.63 | 618.32 | 1234.65 | 617.83 | 12    |
| 3  | 328.19 | 164.6  | 310.18 | 155.59 | L   | 1137.63 | 569.32 | 1120.6  | 560.81 | 1119.62 | 560.31 | 11    |
| 4  | 385.21 | 193.11 | 367.2  | 184.1  | G   | 1024.55 | 512.78 | 1007.52 | 504.26 | 1006.54 | 503.77 | 10    |
| 5  | 442.23 | 221.62 | 424.22 | 212.61 | G   | 967.52  | 484.27 | 950.5   | 475.75 | 949.51  | 475.26 | 9     |
| 6  | 589.3  | 295.15 | 571.29 | 286.15 | F   | 910.5   | 455.76 | 893.48  | 447.24 | 892.49  | 446.75 | 8     |
| 7  | 660.34 | 330.67 | 642.32 | 321.67 | A   | 763.43  | 382.22 | 746.41  | 373.71 | 745.42  | 373.22 | 7     |
| 8  | 717.36 | 359.18 | 699.35 | 350.18 | G   | 692.4   | 346.7  | 675.37  | 338.19 | 674.39  | 337.7  | 6     |
| 9  | 830.44 | 415.72 | 812.43 | 406.72 | L   | 635.38  | 318.19 | 618.35  | 309.68 | 617.37  | 309.19 | 5     |
| 10 | 977.51 | 489.26 | 959.5  | 480.25 | F   | 522.29  | 261.65 | 505.27  | 253.14 | 504.28  | 252.64 | 4     |

|    |         |        |         |        |   |        |        |        |        |        |        |   |
|----|---------|--------|---------|--------|---|--------|--------|--------|--------|--------|--------|---|
| 11 | 1092.54 | 546.77 | 1074.53 | 537.77 | D | 375.22 | 188.12 | 358.2  | 179.6  | 357.21 | 179.11 | 3 |
| 12 | 1205.62 | 603.31 | 1187.61 | 594.31 | L | 260.2  | 130.6  | 243.17 | 122.09 |        |        | 2 |
| 13 |         |        |         |        | K | 147.11 | 74.06  | 130.09 | 65.55  |        |        | 1 |

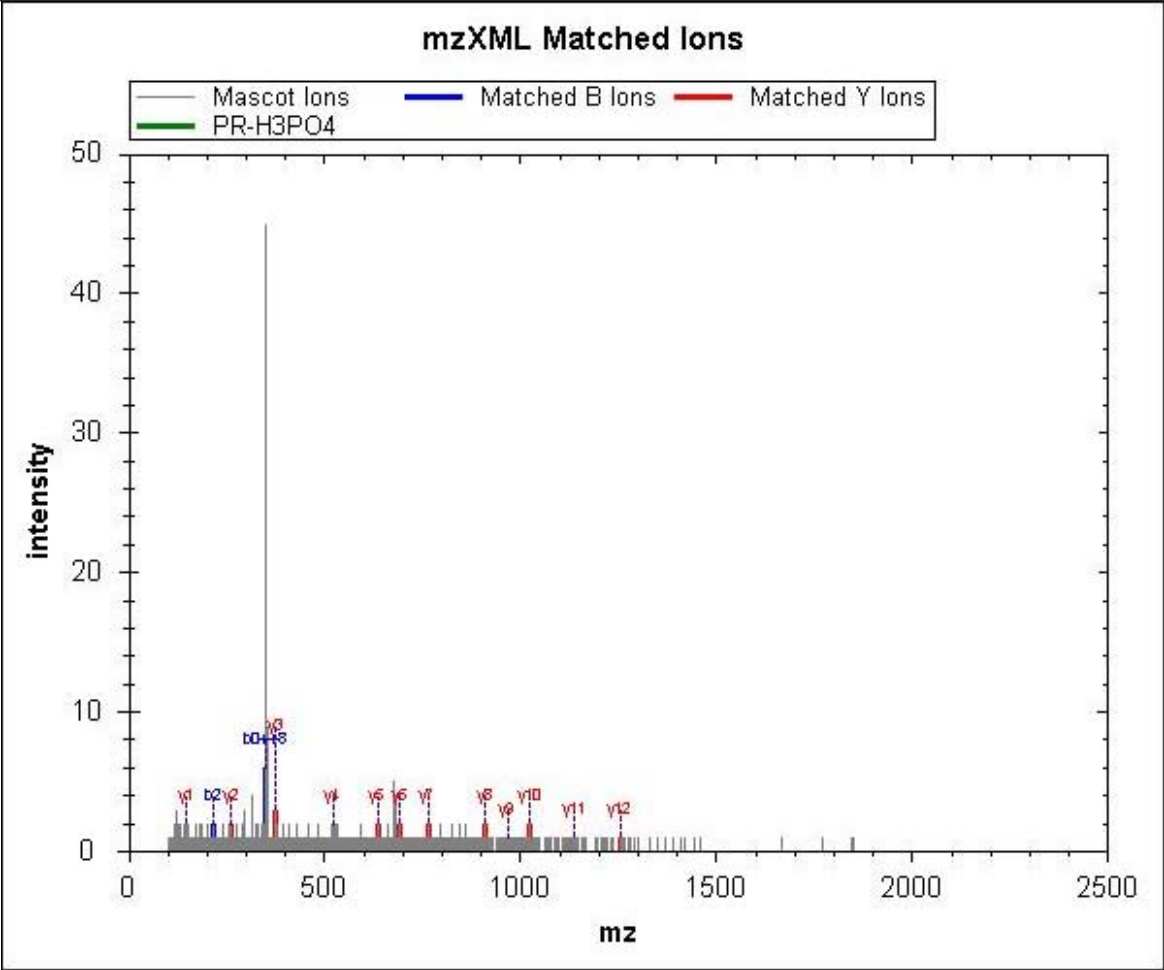

Protein index=1332, ACC No: IPI00218993

Peptide index=5960 MS/MS spectrum

Sequence: IEVPLYSLLEQTHLK, m/z:891.9976, charge:+ 2, Modification: , Mod Position:

Score: 56.53, Raw data:WET\_B2\_090616\_03.mzxml, MS/MS Elution time: 80.34084, Scan number:4432, Mass delta:-0.0121, Rank:1

| No | b      | b++    | b* | b*++ | b0      | b0++   | Seq | y       | y++    | y*      | y*++   | y0      | y0++   | RevNo |
|----|--------|--------|----|------|---------|--------|-----|---------|--------|---------|--------|---------|--------|-------|
| 1  | 114.09 | 57.55  |    |      |         |        | I   |         |        |         |        |         |        | 15    |
| 2  | 243.13 | 122.07 |    |      | 225.12  | 113.07 | E   | 1669.92 | 835.46 | 1652.89 | 826.95 | 1651.91 | 826.46 | 14    |
| 3  | 342.2  | 171.6  |    |      | 324.19  | 162.6  | V   | 1540.87 | 770.94 | 1523.85 | 762.43 | 1522.86 | 761.93 | 13    |
| 4  | 439.26 | 220.13 |    |      | 421.24  | 211.13 | P   | 1441.8  | 721.41 | 1424.78 | 712.89 | 1423.79 | 712.4  | 12    |
| 5  | 552.34 | 276.67 |    |      | 534.33  | 267.67 | L   | 1344.75 | 672.88 | 1327.73 | 664.37 | 1326.74 | 663.87 | 11    |
| 6  | 715.4  | 358.2  |    |      | 697.39  | 349.2  | Y   | 1231.67 | 616.34 | 1214.64 | 607.82 | 1213.66 | 607.33 | 10    |
| 7  | 802.43 | 401.72 |    |      | 784.42  | 392.72 | S   | 1068.6  | 534.81 | 1051.58 | 526.29 | 1050.59 | 525.8  | 9     |
| 8  | 915.52 | 458.26 |    |      | 897.51  | 449.26 | L   | 981.57  | 491.29 | 964.55  | 482.78 | 963.56  | 482.28 | 8     |
| 9  | 1028.6 | 514.81 |    |      | 1010.59 | 505.8  | L   | 868.49  | 434.75 | 851.46  | 426.23 | 850.48  | 425.74 | 7     |

|    |         |        |         |        |         |        |   |        |        |        |        |        |        |   |
|----|---------|--------|---------|--------|---------|--------|---|--------|--------|--------|--------|--------|--------|---|
| 10 | 1157.65 | 579.33 |         |        | 1139.63 | 570.32 | E | 755.4  | 378.21 | 738.38 | 369.69 | 737.39 | 369.2  | 6 |
| 11 | 1285.7  | 643.36 | 1268.68 | 634.84 | 1267.69 | 634.35 | Q | 626.36 | 313.68 | 609.34 | 305.17 | 608.35 | 304.68 | 5 |
| 12 | 1386.75 | 693.88 | 1369.73 | 685.37 | 1368.74 | 684.87 | T | 498.3  | 249.66 | 481.28 | 241.14 | 480.29 | 240.65 | 4 |
| 13 | 1523.81 | 762.41 | 1506.78 | 753.9  | 1505.8  | 753.4  | H | 397.26 | 199.13 | 380.23 | 190.62 |        |        | 3 |
| 14 | 1636.89 | 818.95 | 1619.87 | 810.44 | 1618.88 | 809.95 | L | 260.2  | 130.6  | 243.17 | 122.09 |        |        | 2 |
| 15 |         |        |         |        |         |        | K | 147.11 | 74.06  | 130.09 | 65.55  |        |        | 1 |

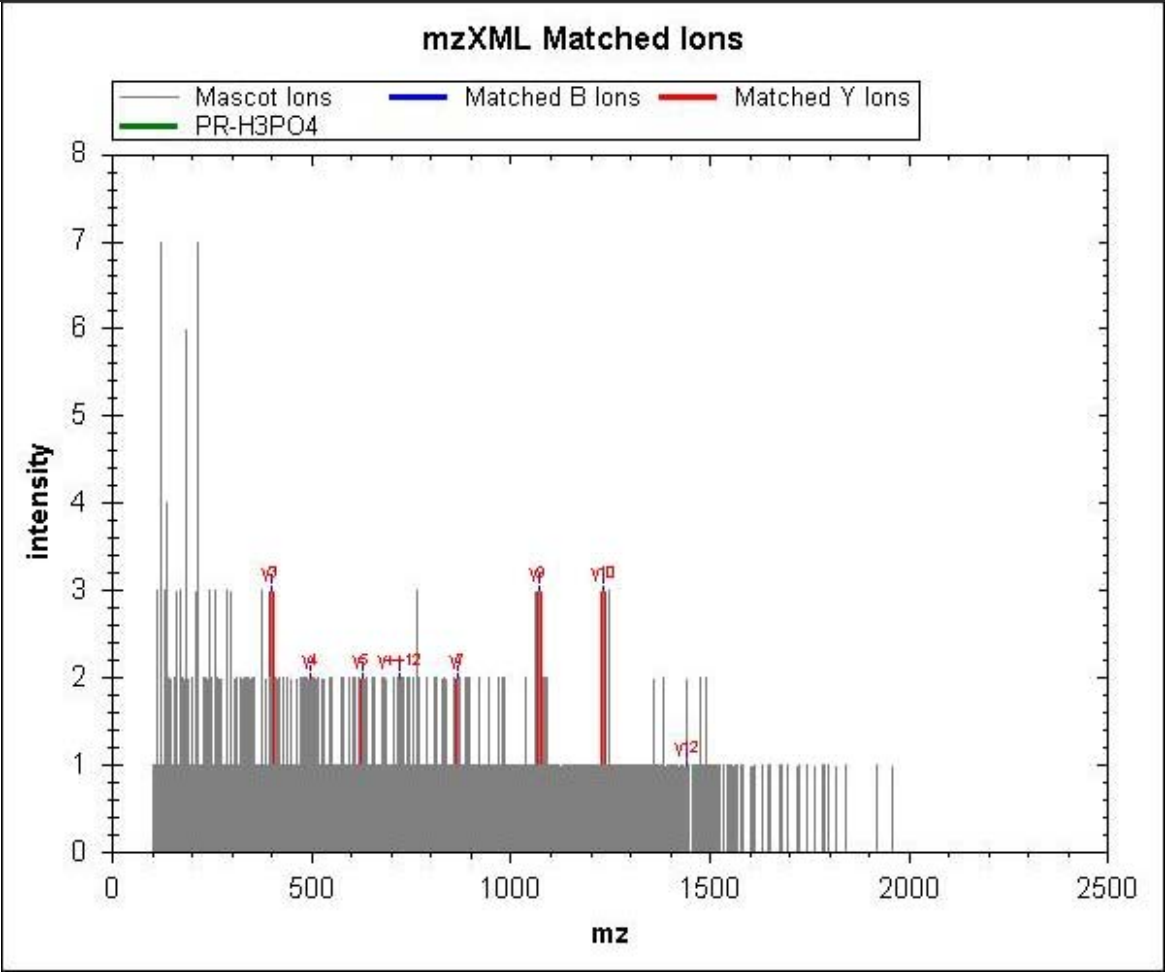

Protein index=1333, ACC No:IPI00418336

Peptide index=6704 MS/MS spectrum

Sequence: LAQLTLEQILEHLDNLR, m/z:673.7107, charge:+ 3, Modification: , Mod Position:

Score: 32.19, Raw data:WET\_B2\_090616\_03.mzxml, MS/MS Elution time: 94.441, Scan number:5252, Mass delta:-0.0057, Rank:1

| No | b      | b++    | b*     | b*++   | b0     | b0++   | Seq | y       | y++    | y*      | y*++   | y0      | y0++   | RevNo |
|----|--------|--------|--------|--------|--------|--------|-----|---------|--------|---------|--------|---------|--------|-------|
| 1  | 114.09 | 57.55  |        |        |        |        | L   |         |        |         |        |         |        | 17    |
| 2  | 185.13 | 93.07  |        |        |        |        | A   | 1906.04 | 953.52 | 1889.01 | 945.01 | 1888.03 | 944.52 | 16    |
| 3  | 313.19 | 157.1  | 296.16 | 148.58 |        |        | Q   | 1835    | 918    | 1817.98 | 909.49 | 1816.99 | 909    | 15    |
| 4  | 426.27 | 213.64 | 409.24 | 205.13 |        |        | L   | 1706.94 | 853.98 | 1689.92 | 845.46 | 1688.93 | 844.97 | 14    |
| 5  | 527.32 | 264.16 | 510.29 | 255.65 | 509.31 | 255.16 | T   | 1593.86 | 797.43 | 1576.83 | 788.92 | 1575.85 | 788.43 | 13    |
| 6  | 640.4  | 320.71 | 623.38 | 312.19 | 622.39 | 311.7  | L   | 1492.81 | 746.91 | 1475.79 | 738.4  | 1474.8  | 737.9  | 12    |

|    |         |        |         |        |         |        |   |         |        |         |        |         |        |    |
|----|---------|--------|---------|--------|---------|--------|---|---------|--------|---------|--------|---------|--------|----|
| 7  | 769.45  | 385.23 | 752.42  | 376.71 | 751.43  | 376.22 | E | 1379.73 | 690.37 | 1362.7  | 681.85 | 1361.72 | 681.36 | 11 |
| 8  | 897.5   | 449.26 | 880.48  | 440.74 | 879.49  | 440.25 | Q | 1250.69 | 625.85 | 1233.66 | 617.33 | 1232.67 | 616.84 | 10 |
| 9  | 1010.59 | 505.8  | 993.56  | 497.28 | 992.58  | 496.79 | I | 1122.63 | 561.82 | 1105.6  | 553.3  | 1104.62 | 552.81 | 9  |
| 10 | 1123.67 | 562.34 | 1106.65 | 553.83 | 1105.66 | 553.33 | L | 1009.54 | 505.27 | 992.52  | 496.76 | 991.53  | 496.27 | 8  |
| 11 | 1252.71 | 626.86 | 1235.69 | 618.35 | 1234.7  | 617.86 | E | 896.46  | 448.73 | 879.43  | 440.22 | 878.45  | 439.73 | 7  |
| 12 | 1389.77 | 695.39 | 1372.75 | 686.88 | 1371.76 | 686.39 | H | 767.42  | 384.21 | 750.39  | 375.7  | 749.41  | 375.21 | 6  |
| 13 | 1502.86 | 751.93 | 1485.83 | 743.42 | 1484.85 | 742.93 | L | 630.36  | 315.68 | 613.33  | 307.17 | 612.35  | 306.68 | 5  |
| 14 | 1617.88 | 809.45 | 1600.86 | 800.93 | 1599.87 | 800.44 | D | 517.27  | 259.14 | 500.25  | 250.63 | 499.26  | 250.13 | 4  |
| 15 | 1731.93 | 866.47 | 1714.9  | 857.95 | 1713.92 | 857.46 | N | 402.25  | 201.63 | 385.22  | 193.11 |         |        | 3  |
| 16 | 1845.01 | 923.01 | 1827.99 | 914.5  | 1827    | 914    | L | 288.2   | 144.61 | 271.18  | 136.09 |         |        | 2  |
| 17 |         |        |         |        |         |        | R | 175.12  | 88.06  | 158.09  | 79.55  |         |        | 1  |

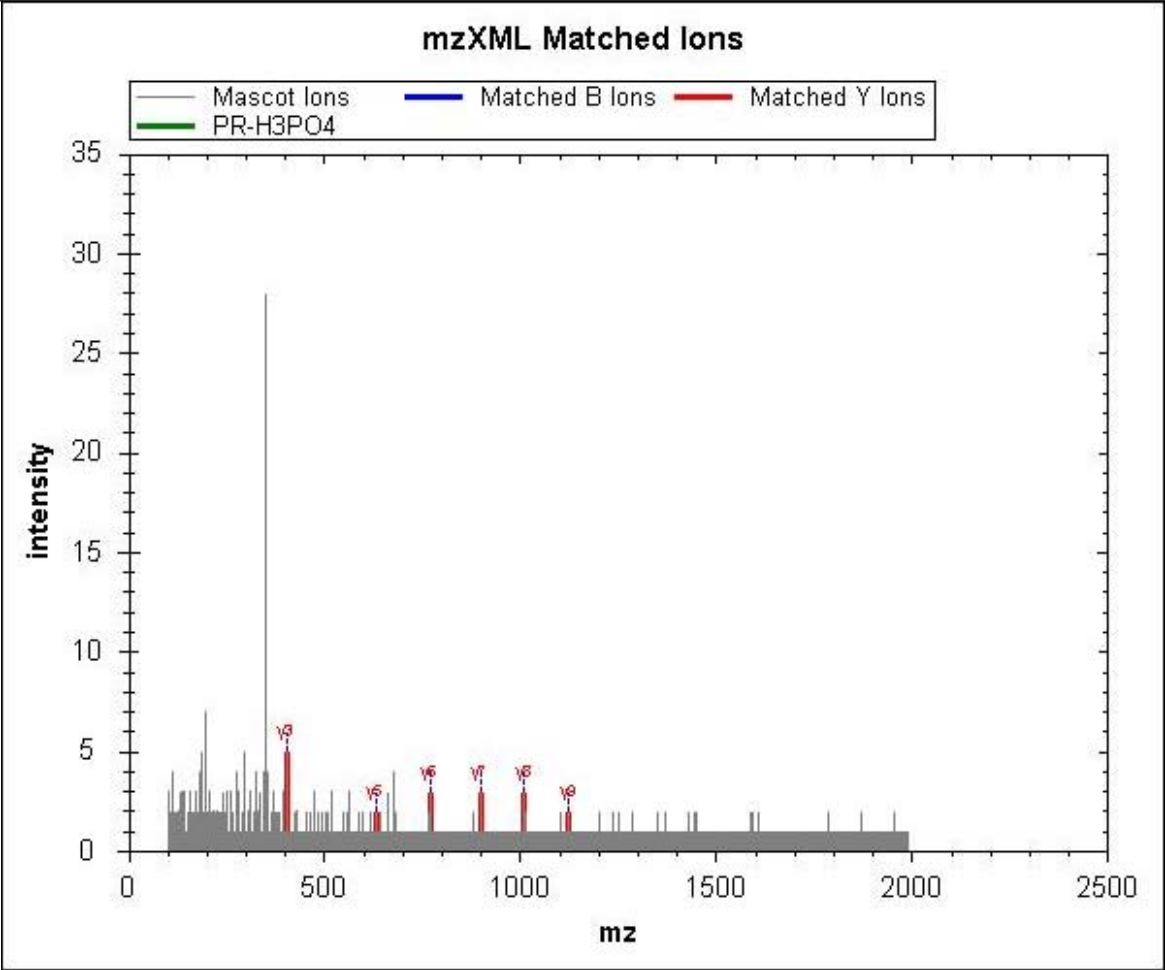

Protein index=1334, ACC No: IPI00744531

Peptide index=4255 MS/MS spectrum

Sequence: RLCTTLIANHTTR, m/z:750.3686, charge:+ 2, Modification: , Mod Position:

Score: 32.96, Raw data:WET\_B2\_090616\_03.mzxml, MS/MS Elution time: 60.4875, Scan number:3279, Mass delta:-0.0812, Rank:1

| No | b      | b++   | b*     | b*++  | b0 | b0++ | Seq | y | y++ | y* | y*++ | y0 | y0++ | RevNo |
|----|--------|-------|--------|-------|----|------|-----|---|-----|----|------|----|------|-------|
| 1  | 157.11 | 79.06 | 140.08 | 70.54 |    |      | R   |   |     |    |      |    |      | 13    |

|    |         |        |         |        |         |        |   |         |        |         |        |         |        |    |
|----|---------|--------|---------|--------|---------|--------|---|---------|--------|---------|--------|---------|--------|----|
| 2  | 270.19  | 135.6  | 253.17  | 127.09 |         |        | L | 1343.71 | 672.36 | 1326.68 | 663.85 | 1325.7  | 663.35 | 12 |
| 3  | 373.2   | 187.1  | 356.18  | 178.59 |         |        | C | 1230.63 | 615.82 | 1213.6  | 607.3  | 1212.62 | 606.81 | 11 |
| 4  | 474.25  | 237.63 | 457.22  | 229.12 | 456.24  | 228.62 | T | 1127.62 | 564.31 | 1110.59 | 555.8  | 1109.61 | 555.31 | 10 |
| 5  | 575.3   | 288.15 | 558.27  | 279.64 | 557.29  | 279.15 | T | 1026.57 | 513.79 | 1009.54 | 505.27 | 1008.56 | 504.78 | 9  |
| 6  | 688.38  | 344.69 | 671.35  | 336.18 | 670.37  | 335.69 | L | 925.52  | 463.26 | 908.49  | 454.75 | 907.51  | 454.26 | 8  |
| 7  | 801.47  | 401.24 | 784.44  | 392.72 | 783.45  | 392.23 | I | 812.44  | 406.72 | 795.41  | 398.21 | 794.43  | 397.72 | 7  |
| 8  | 872.5   | 436.75 | 855.48  | 428.24 | 854.49  | 427.75 | A | 699.35  | 350.18 | 682.33  | 341.67 | 681.34  | 341.17 | 6  |
| 9  | 986.55  | 493.78 | 969.52  | 485.26 | 968.53  | 484.77 | N | 628.32  | 314.66 | 611.29  | 306.15 | 610.31  | 305.66 | 5  |
| 10 | 1123.6  | 562.31 | 1106.58 | 553.79 | 1105.59 | 553.3  | H | 514.27  | 257.64 | 497.25  | 249.13 | 496.26  | 248.63 | 4  |
| 11 | 1224.65 | 612.83 | 1207.63 | 604.32 | 1206.64 | 603.82 | T | 377.21  | 189.11 | 360.19  | 180.6  | 359.2   | 180.11 | 3  |
| 12 | 1325.7  | 663.35 | 1308.67 | 654.84 | 1307.69 | 654.35 | T | 276.17  | 138.59 | 259.14  | 130.07 | 258.16  | 129.58 | 2  |
| 13 |         |        |         |        |         |        | R | 175.12  | 88.06  | 158.09  | 79.55  |         |        | 1  |

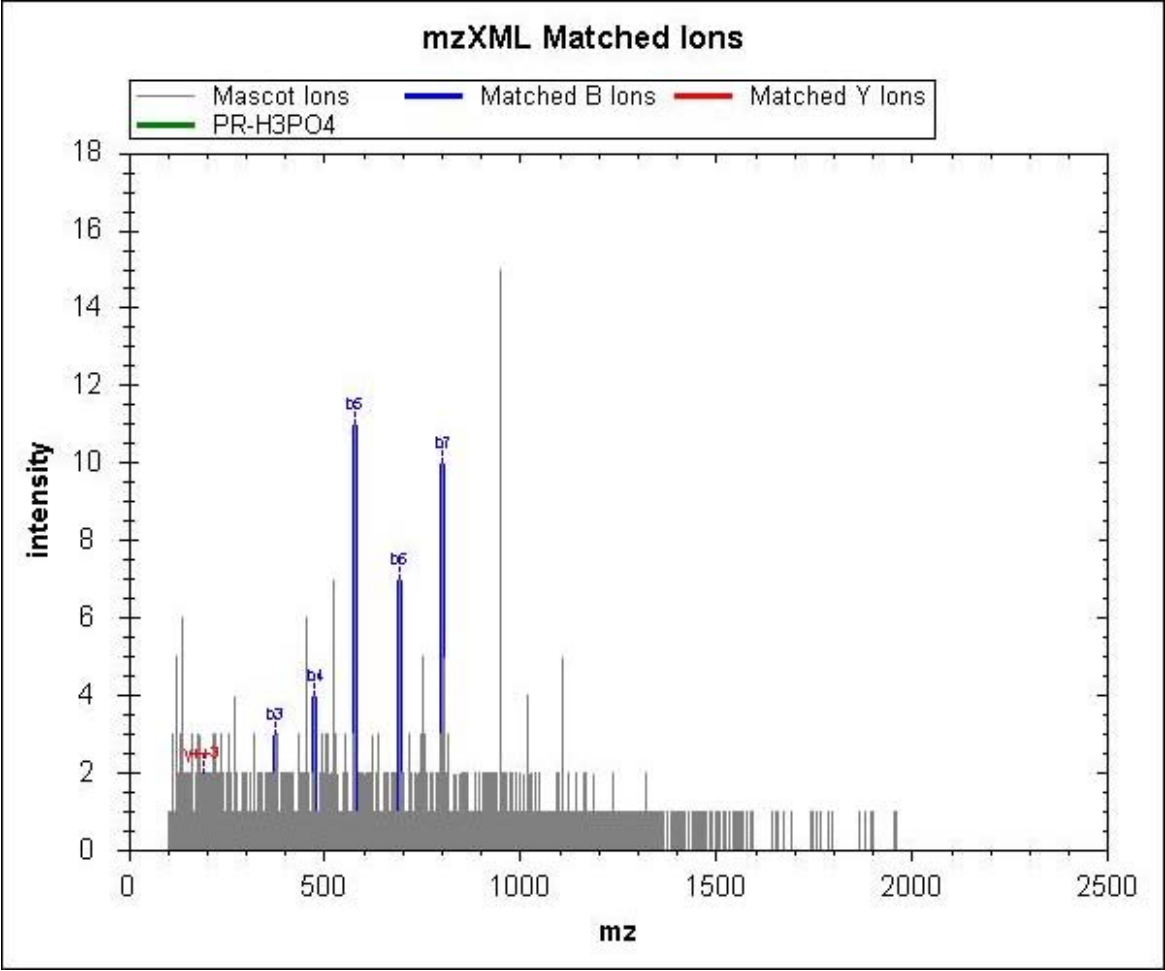

Protein index=1335, ACC No: IPI00006442

Peptide index=5353 MS/MS spectrum

Sequence: VVTDLISLIR, m/z:564.8536, charge:+ 2, Modification: , Mod Position:

Score: 66.65, Raw data:WET\_B2\_090616\_03.mzxml, MS/MS Elution time: 72.28133, Scan number:3964, Mass delta:0.0012, Rank:1

| No | b | b++ | b0 | b0++ | Seq | y | y++ | y* | y*++ | y0 | y0++ | RevNo |
|----|---|-----|----|------|-----|---|-----|----|------|----|------|-------|
|    |   |     |    |      |     |   |     |    |      |    |      |       |

|    |        |        |        |        |   |         |        |        |        |         |        |    |
|----|--------|--------|--------|--------|---|---------|--------|--------|--------|---------|--------|----|
| 1  | 100.08 | 50.54  |        |        | V |         |        |        |        |         |        | 10 |
| 2  | 199.14 | 100.08 |        |        | V | 1029.63 | 515.32 | 1012.6 | 506.81 | 1011.62 | 506.31 | 9  |
| 3  | 300.19 | 150.6  | 282.18 | 141.59 | T | 930.56  | 465.78 | 913.54 | 457.27 | 912.55  | 456.78 | 8  |
| 4  | 415.22 | 208.11 | 397.21 | 199.11 | D | 829.51  | 415.26 | 812.49 | 406.75 | 811.5   | 406.26 | 7  |
| 5  | 528.3  | 264.66 | 510.29 | 255.65 | L | 714.49  | 357.75 | 697.46 | 349.23 | 696.48  | 348.74 | 6  |
| 6  | 641.39 | 321.2  | 623.38 | 312.19 | I | 601.4   | 301.21 | 584.38 | 292.69 | 583.39  | 292.2  | 5  |
| 7  | 728.42 | 364.71 | 710.41 | 355.71 | S | 488.32  | 244.66 | 471.29 | 236.15 | 470.31  | 235.66 | 4  |
| 8  | 841.5  | 421.26 | 823.49 | 412.25 | L | 401.29  | 201.15 | 384.26 | 192.63 |         |        | 3  |
| 9  | 954.59 | 477.8  | 936.58 | 468.79 | I | 288.2   | 144.61 | 271.18 | 136.09 |         |        | 2  |
| 10 |        |        |        |        | R | 175.12  | 88.06  | 158.09 | 79.55  |         |        | 1  |

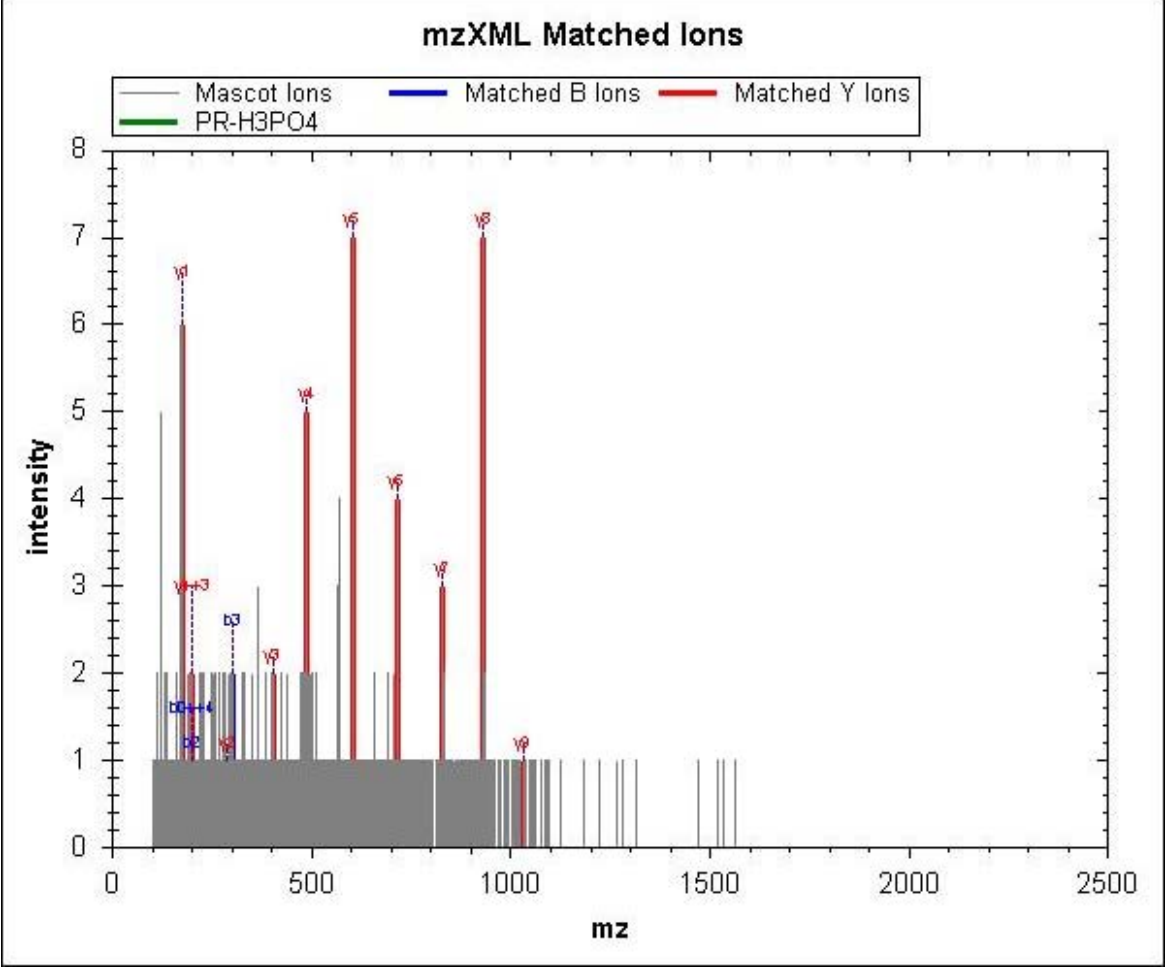

|    |         |        |         |        |         |        |   |         |        |         |        |         |        |    |
|----|---------|--------|---------|--------|---------|--------|---|---------|--------|---------|--------|---------|--------|----|
| 3  | 312.19  | 156.6  |         |        | 294.18  | 147.59 | P | 1277.65 | 639.33 | 1260.62 | 630.82 | 1259.64 | 630.32 | 12 |
| 4  | 449.25  | 225.13 |         |        | 431.24  | 216.12 | H | 1180.6  | 590.8  | 1163.57 | 582.29 | 1162.59 | 581.8  | 11 |
| 5  | 506.27  | 253.64 |         |        | 488.26  | 244.63 | G | 1043.54 | 522.27 | 1026.51 | 513.76 | 1025.53 | 513.27 | 10 |
| 6  | 577.31  | 289.16 |         |        | 559.3   | 280.15 | A | 986.52  | 493.76 | 969.49  | 485.25 | 968.51  | 484.76 | 9  |
| 7  | 634.33  | 317.67 |         |        | 616.32  | 308.66 | G | 915.48  | 458.24 | 898.45  | 449.73 | 897.47  | 449.24 | 8  |
| 8  | 771.39  | 386.2  |         |        | 753.38  | 377.19 | H | 858.46  | 429.73 | 841.43  | 421.22 | 840.45  | 420.73 | 7  |
| 9  | 884.47  | 442.74 |         |        | 866.46  | 433.74 | L | 721.4   | 361.2  | 704.37  | 352.69 | 703.39  | 352.2  | 6  |
| 10 | 955.51  | 478.26 |         |        | 937.5   | 469.25 | A | 608.32  | 304.66 | 591.29  | 296.15 | 590.3   | 295.66 | 5  |
| 11 | 1102.58 | 551.79 |         |        | 1084.57 | 542.79 | F | 537.28  | 269.14 | 520.25  | 260.63 | 519.27  | 260.14 | 4  |
| 12 | 1189.61 | 595.31 |         |        | 1171.6  | 586.3  | S | 390.21  | 195.61 | 373.18  | 187.1  | 372.2   | 186.6  | 3  |
| 13 | 1317.67 | 659.34 | 1300.64 | 650.83 | 1299.66 | 650.33 | Q | 303.18  | 152.09 | 286.15  | 143.58 |         |        | 2  |
| 14 |         |        |         |        |         |        | R | 175.12  | 88.06  | 158.09  | 79.55  |         |        | 1  |

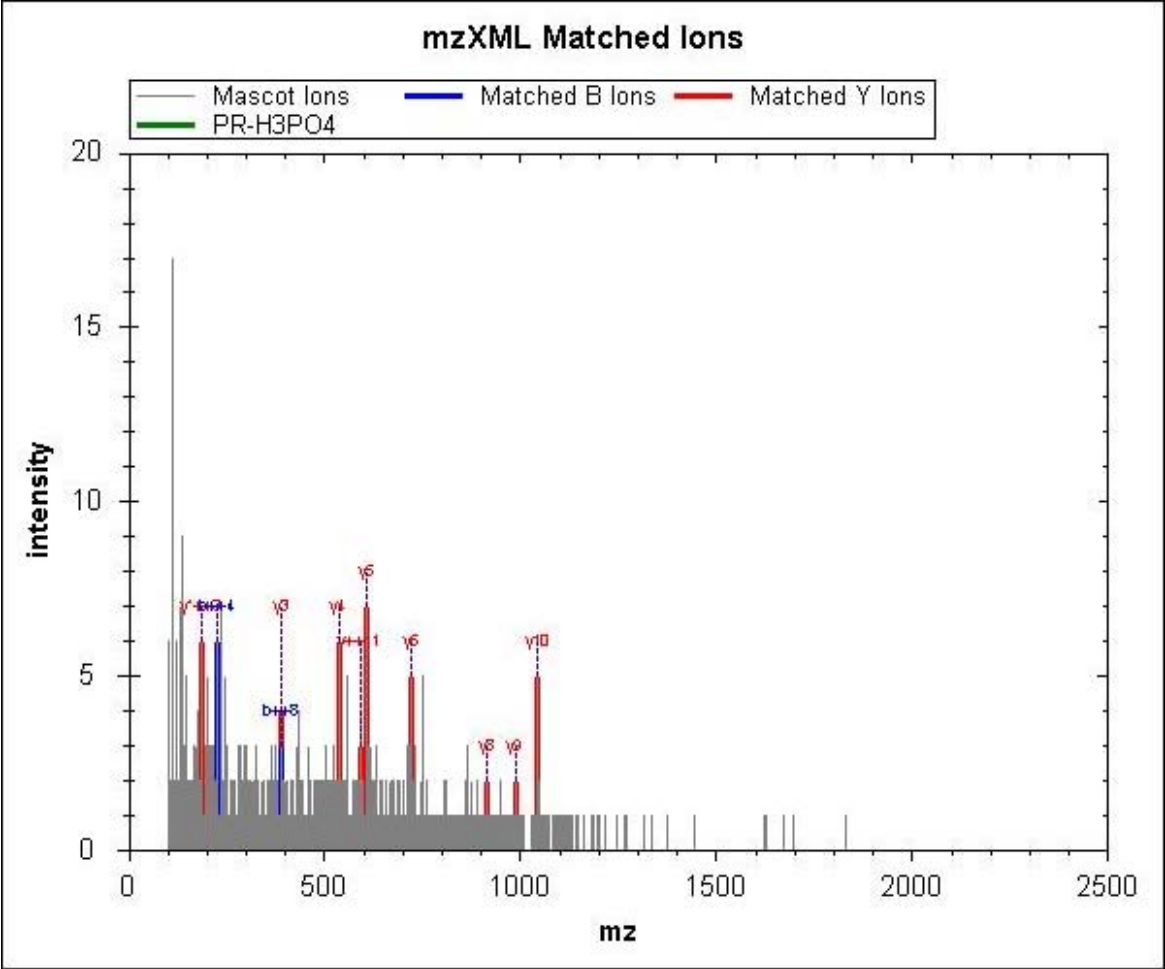

Protein index=1337, ACC No: IPI00186581

Peptide index=5980 MS/MS spectrum

Sequence: EIFFNILVPGAEAAQK, m/z: 902.9767, charge: + 2, Modification: , Mod Position:

Score: 49.94, Raw data: WET\_B2\_090616\_03.mzxml, MS/MS Elution time: 80.64717, Scan number: 4450, Mass delta: -0.0018, Rank: 1

| No | b | b++ | b* | b*++ | b0 | b0++ | Seq | y | y++ | y* | y*++ | y0 | y0++ | RevNo |
|----|---|-----|----|------|----|------|-----|---|-----|----|------|----|------|-------|
|----|---|-----|----|------|----|------|-----|---|-----|----|------|----|------|-------|

|    |         |        |         |        |         |        |   |         |        |         |        |         |        |    |
|----|---------|--------|---------|--------|---------|--------|---|---------|--------|---------|--------|---------|--------|----|
| 1  | 130.05  | 65.53  |         |        | 112.04  | 56.52  | E |         |        |         |        |         |        | 16 |
| 2  | 243.13  | 122.07 |         |        | 225.12  | 113.07 | I | 1675.91 | 838.46 | 1658.88 | 829.94 | 1657.89 | 829.45 | 15 |
| 3  | 390.2   | 195.6  |         |        | 372.19  | 186.6  | F | 1562.82 | 781.91 | 1545.79 | 773.4  | 1544.81 | 772.91 | 14 |
| 4  | 537.27  | 269.14 |         |        | 519.26  | 260.13 | F | 1415.75 | 708.38 | 1398.73 | 699.87 | 1397.74 | 699.37 | 13 |
| 5  | 651.31  | 326.16 | 634.29  | 317.65 | 633.3   | 317.16 | N | 1268.68 | 634.85 | 1251.66 | 626.33 | 1250.67 | 625.84 | 12 |
| 6  | 764.4   | 382.7  | 747.37  | 374.19 | 746.39  | 373.7  | I | 1154.64 | 577.82 | 1137.62 | 569.31 | 1136.63 | 568.82 | 11 |
| 7  | 877.48  | 439.24 | 860.46  | 430.73 | 859.47  | 430.24 | L | 1041.56 | 521.28 | 1024.53 | 512.77 | 1023.55 | 512.28 | 10 |
| 8  | 976.55  | 488.78 | 959.52  | 480.27 | 958.54  | 479.77 | V | 928.47  | 464.74 | 911.45  | 456.23 | 910.46  | 455.74 | 9  |
| 9  | 1073.6  | 537.31 | 1056.58 | 528.79 | 1055.59 | 528.3  | P | 829.41  | 415.21 | 812.38  | 406.69 | 811.39  | 406.2  | 8  |
| 10 | 1130.62 | 565.82 | 1113.6  | 557.3  | 1112.61 | 556.81 | G | 732.35  | 366.68 | 715.33  | 358.17 | 714.34  | 357.67 | 7  |
| 11 | 1201.66 | 601.33 | 1184.64 | 592.82 | 1183.65 | 592.33 | A | 675.33  | 338.17 | 658.3   | 329.66 | 657.32  | 329.16 | 6  |
| 12 | 1330.7  | 665.86 | 1313.68 | 657.34 | 1312.69 | 656.85 | E | 604.29  | 302.65 | 587.27  | 294.14 | 586.28  | 293.65 | 5  |
| 13 | 1459.75 | 730.38 | 1442.72 | 721.86 | 1441.74 | 721.37 | E | 475.25  | 238.13 | 458.22  | 229.62 | 457.24  | 229.12 | 4  |
| 14 | 1530.78 | 765.9  | 1513.76 | 757.38 | 1512.77 | 756.89 | A | 346.21  | 173.61 | 329.18  | 165.09 |         |        | 3  |
| 15 | 1658.84 | 829.92 | 1641.82 | 821.41 | 1640.83 | 820.92 | Q | 275.17  | 138.09 | 258.14  | 129.58 |         |        | 2  |
| 16 |         |        |         |        |         |        | K | 147.11  | 74.06  | 130.09  | 65.55  |         |        | 1  |

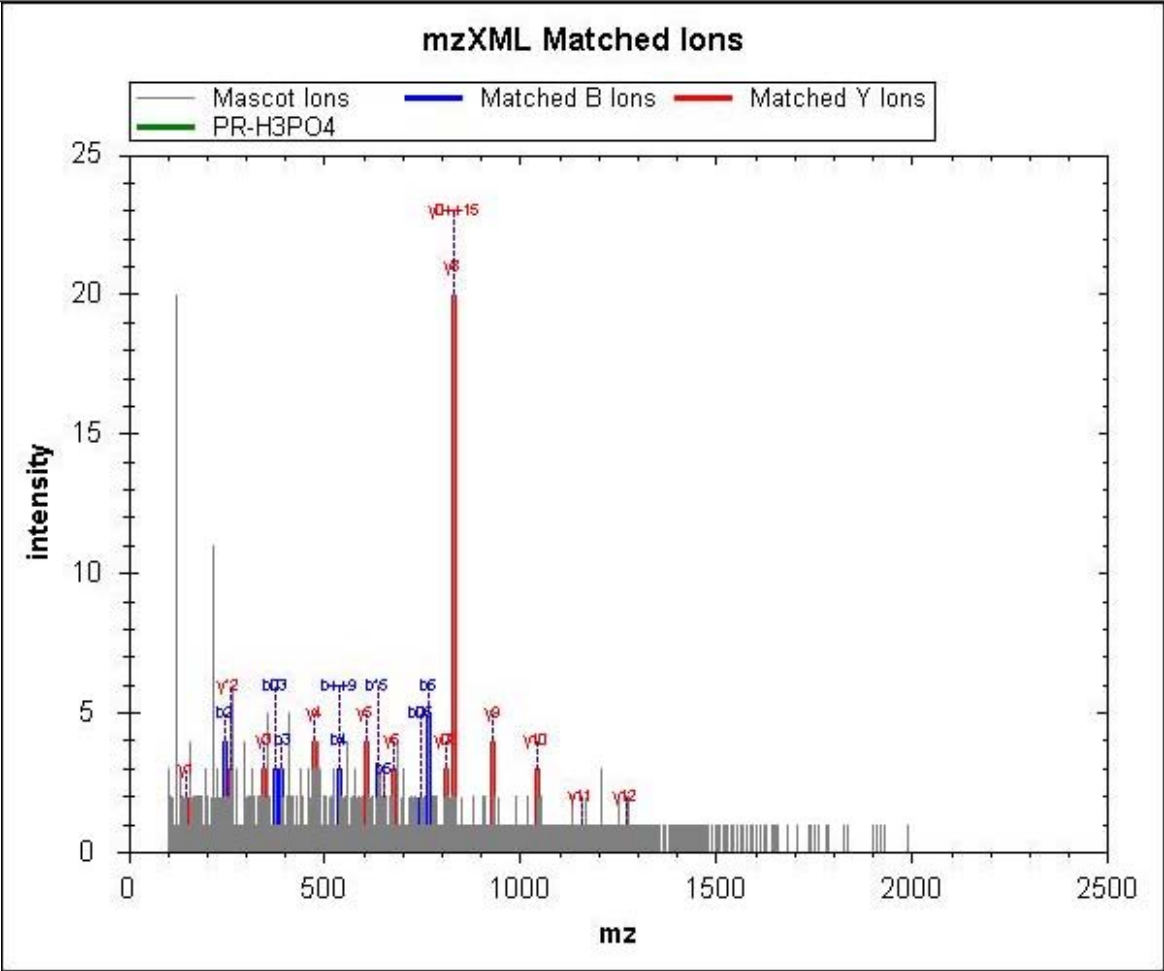

Protein index=1338, ACC No: IPI00012912

Peptide index=6985 MS/MS spectrum

Sequence: LSPDAVAQLAFQMAFLR, m/z: 939.5045, charge: + 2, Modification: , Mod Position:

Score: 37.93, Raw data:WET\_B3\_090616\_03.mzxml, MS/MS Elution time: 103.0255, Scan number:5788, Mass delta:0.001, Rank:1

| No | b       | b++    | b*      | b*++   | b0      | b0++   | Seq | y       | y++    | y*      | y*++   | y0      | y0++   | RevNo |
|----|---------|--------|---------|--------|---------|--------|-----|---------|--------|---------|--------|---------|--------|-------|
| 1  | 114.09  | 57.55  |         |        |         |        | L   |         |        |         |        |         |        | 17    |
| 2  | 201.12  | 101.07 |         |        | 183.11  | 92.06  | S   | 1764.91 | 882.96 | 1747.88 | 874.45 | 1746.9  | 873.95 | 16    |
| 3  | 298.18  | 149.59 |         |        | 280.17  | 140.59 | P   | 1677.88 | 839.44 | 1660.85 | 830.93 | 1659.87 | 830.44 | 15    |
| 4  | 413.2   | 207.11 |         |        | 395.19  | 198.1  | D   | 1580.83 | 790.92 | 1563.8  | 782.4  | 1562.81 | 781.91 | 14    |
| 5  | 484.24  | 242.62 |         |        | 466.23  | 233.62 | A   | 1465.8  | 733.4  | 1448.77 | 724.89 |         |        | 13    |
| 6  | 583.31  | 292.16 |         |        | 565.3   | 283.15 | V   | 1394.76 | 697.88 | 1377.73 | 689.37 |         |        | 12    |
| 7  | 654.35  | 327.68 |         |        | 636.34  | 318.67 | A   | 1295.69 | 648.35 | 1278.67 | 639.84 |         |        | 11    |
| 8  | 782.4   | 391.71 | 765.38  | 383.19 | 764.39  | 382.7  | Q   | 1224.66 | 612.83 | 1207.63 | 604.32 |         |        | 10    |
| 9  | 895.49  | 448.25 | 878.46  | 439.73 | 877.48  | 439.24 | L   | 1096.6  | 548.8  | 1079.57 | 540.29 |         |        | 9     |
| 10 | 966.53  | 483.77 | 949.5   | 475.25 | 948.51  | 474.76 | A   | 983.51  | 492.26 | 966.49  | 483.75 |         |        | 8     |
| 11 | 1113.59 | 557.3  | 1096.57 | 548.79 | 1095.58 | 548.3  | F   | 912.48  | 456.74 | 895.45  | 448.23 |         |        | 7     |
| 12 | 1241.65 | 621.33 | 1224.63 | 612.82 | 1223.64 | 612.32 | Q   | 765.41  | 383.21 | 748.38  | 374.69 |         |        | 6     |
| 13 | 1372.69 | 686.85 | 1355.67 | 678.34 | 1354.68 | 677.84 | M   | 637.35  | 319.18 | 620.32  | 310.66 |         |        | 5     |
| 14 | 1443.73 | 722.37 | 1426.7  | 713.86 | 1425.72 | 713.36 | A   | 506.31  | 253.66 | 489.28  | 245.14 |         |        | 4     |
| 15 | 1590.8  | 795.9  | 1573.77 | 787.39 | 1572.79 | 786.9  | F   | 435.27  | 218.14 | 418.24  | 209.63 |         |        | 3     |
| 16 | 1703.88 | 852.45 | 1686.86 | 843.93 | 1685.87 | 843.44 | L   | 288.2   | 144.61 | 271.18  | 136.09 |         |        | 2     |
| 17 |         |        |         |        |         |        | R   | 175.12  | 88.06  | 158.09  | 79.55  |         |        | 1     |

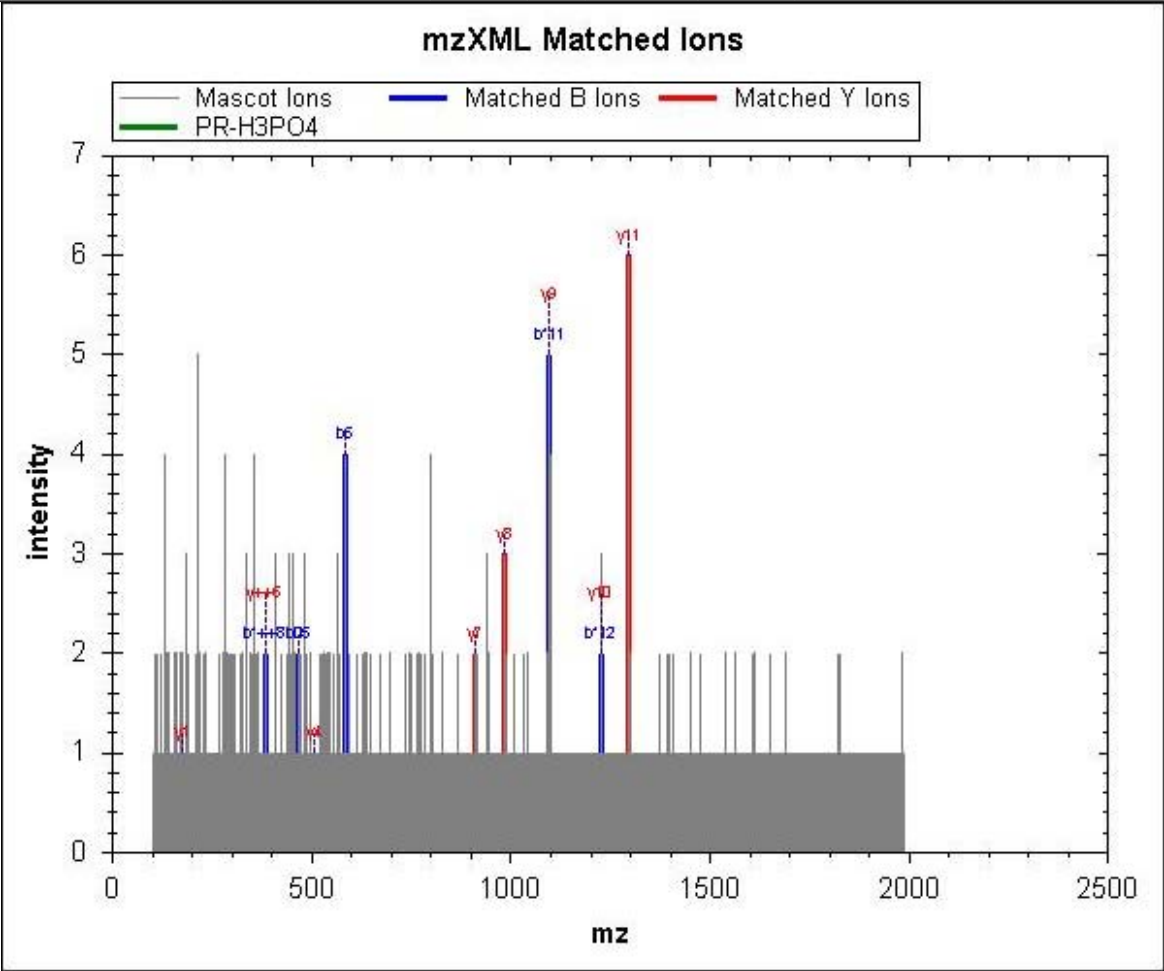

Protein index=1339, ACC No: IPI00150269

Peptide index=1569 MS/MS spectrum

Sequence: GHNTNVGAIVFHPK, m/z:497.5999, charge:+ 3, Modification: , Mod Position:

Score: 32.21, Raw data:WET\_B3\_090616\_01.mzxml, MS/MS Elution time: 34.89, Scan number:1792, Mass delta:-0.0012, Rank:1

| No | b       | b++    | b*      | b*++   | b0      | b0++   | Seq | y       | y++    | y*      | y*++   | y0      | y0++   | RevNo |
|----|---------|--------|---------|--------|---------|--------|-----|---------|--------|---------|--------|---------|--------|-------|
| 1  | 58.03   | 29.52  |         |        |         |        | G   |         |        |         |        |         |        | 14    |
| 2  | 195.09  | 98.05  |         |        |         |        | H   | 1433.76 | 717.39 | 1416.74 | 708.87 | 1415.75 | 708.38 | 13    |
| 3  | 309.13  | 155.07 | 292.1   | 146.56 |         |        | N   | 1296.71 | 648.86 | 1279.68 | 640.34 | 1278.7  | 639.85 | 12    |
| 4  | 410.18  | 205.59 | 393.15  | 197.08 | 392.17  | 196.59 | T   | 1182.66 | 591.84 | 1165.64 | 583.32 | 1164.65 | 582.83 | 11    |
| 5  | 524.22  | 262.61 | 507.19  | 254.1  | 506.21  | 253.61 | N   | 1081.62 | 541.31 | 1064.59 | 532.8  |         |        | 10    |
| 6  | 623.29  | 312.15 | 606.26  | 303.64 | 605.28  | 303.14 | V   | 967.57  | 484.29 | 950.55  | 475.78 |         |        | 9     |
| 7  | 680.31  | 340.66 | 663.28  | 332.15 | 662.3   | 331.65 | G   | 868.5   | 434.76 | 851.48  | 426.24 |         |        | 8     |
| 8  | 751.35  | 376.18 | 734.32  | 367.66 | 733.34  | 367.17 | A   | 811.48  | 406.24 | 794.46  | 397.73 |         |        | 7     |
| 9  | 864.43  | 432.72 | 847.41  | 424.21 | 846.42  | 423.71 | I   | 740.45  | 370.73 | 723.42  | 362.21 |         |        | 6     |
| 10 | 963.5   | 482.25 | 946.47  | 473.74 | 945.49  | 473.25 | V   | 627.36  | 314.18 | 610.33  | 305.67 |         |        | 5     |
| 11 | 1110.57 | 555.79 | 1093.54 | 547.27 | 1092.56 | 546.78 | F   | 528.29  | 264.65 | 511.27  | 256.14 |         |        | 4     |
| 12 | 1247.63 | 624.32 | 1230.6  | 615.8  | 1229.62 | 615.31 | H   | 381.22  | 191.12 | 364.2   | 182.6  |         |        | 3     |
| 13 | 1344.68 | 672.84 | 1327.65 | 664.33 | 1326.67 | 663.84 | P   | 244.17  | 122.59 | 227.14  | 114.07 |         |        | 2     |
| 14 |         |        |         |        |         |        | K   | 147.11  | 74.06  | 130.09  | 65.55  |         |        | 1     |

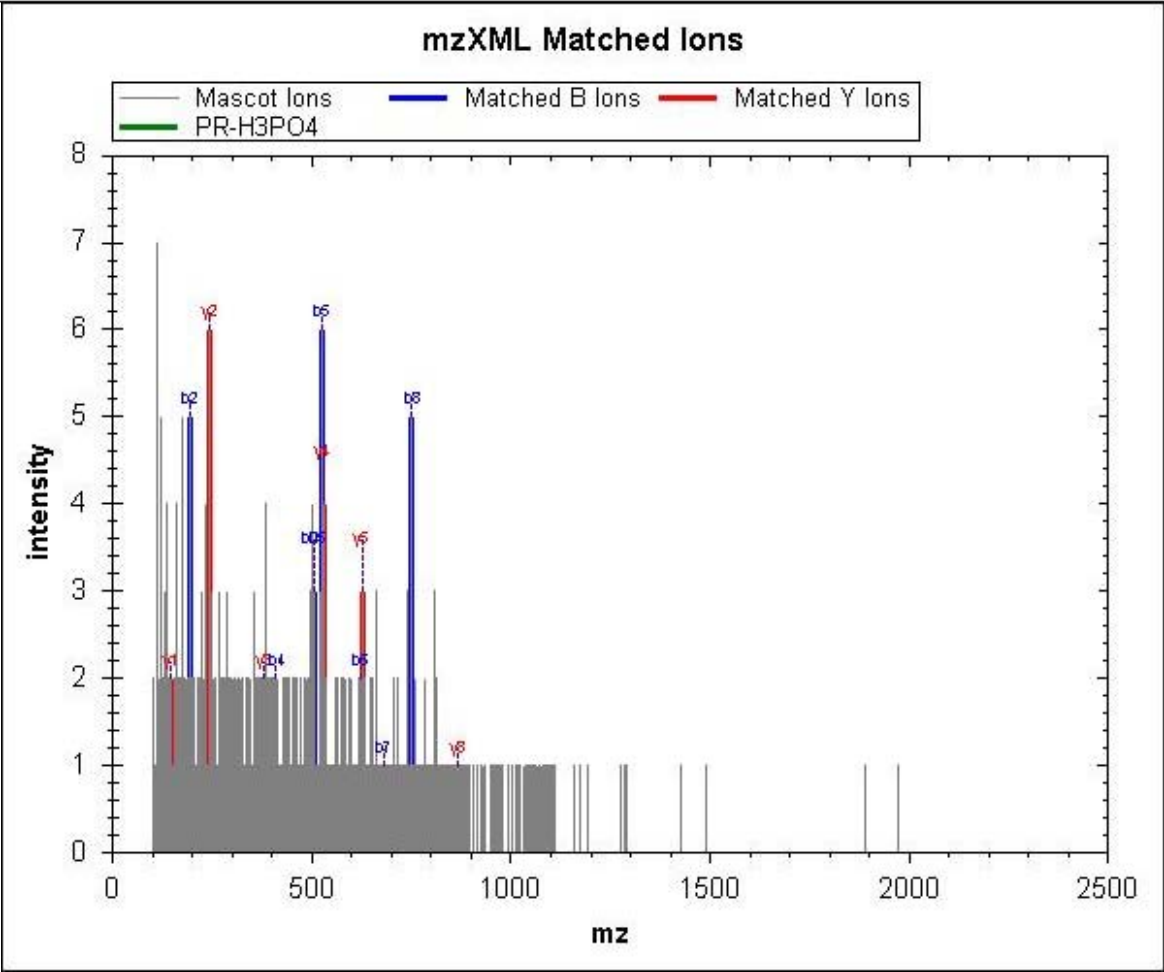

Protein index=1340, ACC No: IPI00018452

Peptide index=6893 MS/MS spectrum

Sequence: EALAQTVLAEVPTQLVSYFR, m/z:1118.113, charge:+ 2, Modification: , Mod Position:

Score: 57.28, Raw data:WET\_B3\_090616\_01.mzxml, MS/MS Elution time: 99.4385, Scan number:5542, Mass delta:0.0168, Rank:1

| No | b       | b++    | b*      | b*++   | b0      | b0++   | Seq | y       | y++     | y*      | y*++    | y0      | y0++    | RevNo |
|----|---------|--------|---------|--------|---------|--------|-----|---------|---------|---------|---------|---------|---------|-------|
| 1  | 130.05  | 65.53  |         |        | 112.04  | 56.52  | E   |         |         |         |         |         |         | 20    |
| 2  | 201.09  | 101.05 |         |        | 183.08  | 92.04  | A   | 2106.16 | 1053.58 | 2089.13 | 1045.07 | 2088.15 | 1044.58 | 19    |
| 3  | 314.17  | 157.59 |         |        | 296.16  | 148.58 | L   | 2035.12 | 1018.06 | 2018.1  | 1009.55 | 2017.11 | 1009.06 | 18    |
| 4  | 385.21  | 193.11 |         |        | 367.2   | 184.1  | A   | 1922.04 | 961.52  | 1905.01 | 953.01  | 1904.03 | 952.52  | 17    |
| 5  | 513.27  | 257.14 | 496.24  | 248.62 | 495.26  | 248.13 | Q   | 1851    | 926     | 1833.97 | 917.49  | 1832.99 | 917     | 16    |
| 6  | 614.31  | 307.66 | 597.29  | 299.15 | 596.3   | 298.66 | T   | 1722.94 | 861.97  | 1705.92 | 853.46  | 1704.93 | 852.97  | 15    |
| 7  | 713.38  | 357.2  | 696.36  | 348.68 | 695.37  | 348.19 | V   | 1621.89 | 811.45  | 1604.87 | 802.94  | 1603.88 | 802.45  | 14    |
| 8  | 826.47  | 413.74 | 809.44  | 405.22 | 808.46  | 404.73 | L   | 1522.83 | 761.92  | 1505.8  | 753.4   | 1504.82 | 752.91  | 13    |
| 9  | 897.5   | 449.26 | 880.48  | 440.74 | 879.49  | 440.25 | A   | 1409.74 | 705.37  | 1392.72 | 696.86  | 1391.73 | 696.37  | 12    |
| 10 | 1026.55 | 513.78 | 1009.52 | 505.26 | 1008.54 | 504.77 | E   | 1338.71 | 669.86  | 1321.68 | 661.34  | 1320.69 | 660.85  | 11    |
| 11 | 1125.61 | 563.31 | 1108.59 | 554.8  | 1107.6  | 554.31 | V   | 1209.66 | 605.33  | 1192.64 | 596.82  | 1191.65 | 596.33  | 10    |
| 12 | 1222.67 | 611.84 | 1205.64 | 603.32 | 1204.66 | 602.83 | P   | 1110.59 | 555.8   | 1093.57 | 547.29  | 1092.58 | 546.8   | 9     |

|    |         |         |         |         |         |         |   |         |        |        |        |        |        |   |
|----|---------|---------|---------|---------|---------|---------|---|---------|--------|--------|--------|--------|--------|---|
| 13 | 1323.72 | 662.36  | 1306.69 | 653.85  | 1305.7  | 653.36  | T | 1013.54 | 507.27 | 996.51 | 498.76 | 995.53 | 498.27 | 8 |
| 14 | 1451.77 | 726.39  | 1434.75 | 717.88  | 1433.76 | 717.39  | Q | 912.49  | 456.75 | 895.47 | 448.24 | 894.48 | 447.75 | 7 |
| 15 | 1564.86 | 782.93  | 1547.83 | 774.42  | 1546.85 | 773.93  | L | 784.44  | 392.72 | 767.41 | 384.21 | 766.42 | 383.72 | 6 |
| 16 | 1663.93 | 832.47  | 1646.9  | 823.95  | 1645.92 | 823.46  | V | 671.35  | 336.18 | 654.32 | 327.67 | 653.34 | 327.17 | 5 |
| 17 | 1750.96 | 875.98  | 1733.93 | 867.47  | 1732.95 | 866.98  | S | 572.28  | 286.64 | 555.26 | 278.13 | 554.27 | 277.64 | 4 |
| 18 | 1914.02 | 957.51  | 1897    | 949     | 1896.01 | 948.51  | Y | 485.25  | 243.13 | 468.22 | 234.62 |        |        | 3 |
| 19 | 2061.09 | 1031.05 | 2044.06 | 1022.54 | 2043.08 | 1022.04 | F | 322.19  | 161.6  | 305.16 | 153.08 |        |        | 2 |
| 20 |         |         |         |         |         |         | R | 175.12  | 88.06  | 158.09 | 79.55  |        |        | 1 |

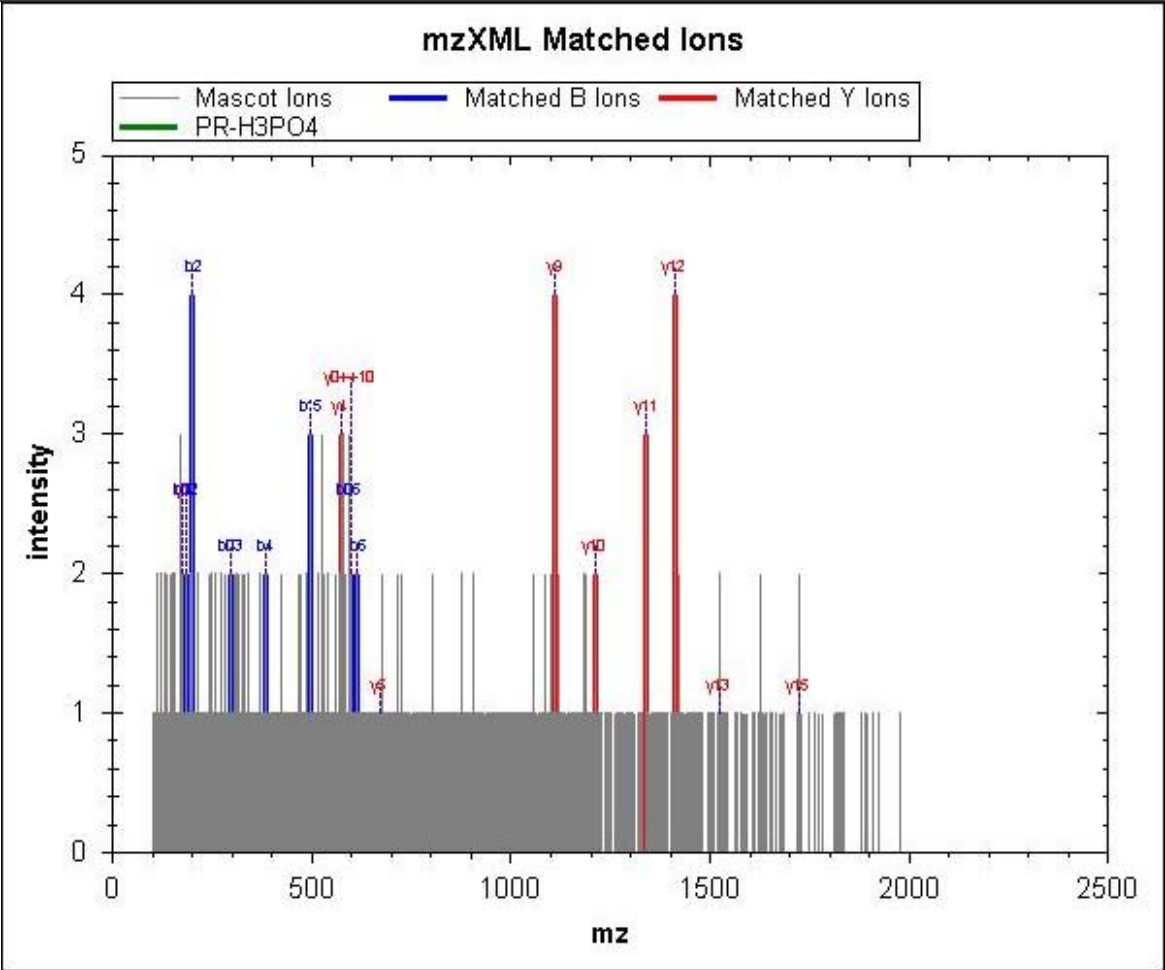

Protein index=1341, ACC No:IP100107745

Peptide index=4528 MS/MS spectrum

Sequence: YLQSLLAEVER, m/z:660.8576, charge:+ 2, Modification: , Mod Position:

Score: 33.75, Raw data:WET\_B3\_090616\_01.mzxml, MS/MS Elution time: 63.08717, Scan number:3430, Mass delta:-0.0079, Rank:1

| No | b      | b++    | b*     | b*++   | b0     | b0++   | Seq | y       | y++    | y*      | y*++   | y0      | y0++   | RevNo |
|----|--------|--------|--------|--------|--------|--------|-----|---------|--------|---------|--------|---------|--------|-------|
| 1  | 164.07 | 82.54  |        |        |        |        | Y   |         |        |         |        |         |        | 11    |
| 2  | 277.15 | 139.08 |        |        |        |        | L   | 1157.65 | 579.33 | 1140.63 | 570.82 | 1139.64 | 570.32 | 10    |
| 3  | 405.21 | 203.11 | 388.19 | 194.6  |        |        | Q   | 1044.57 | 522.79 | 1027.54 | 514.27 | 1026.56 | 513.78 | 9     |
| 4  | 492.25 | 246.63 | 475.22 | 238.11 | 474.23 | 237.62 | S   | 916.51  | 458.76 | 899.48  | 450.25 | 898.5   | 449.75 | 8     |

|    |         |        |         |        |         |        |   |        |        |        |        |        |        |   |
|----|---------|--------|---------|--------|---------|--------|---|--------|--------|--------|--------|--------|--------|---|
| 5  | 605.33  | 303.17 | 588.3   | 294.66 | 587.32  | 294.16 | L | 829.48 | 415.24 | 812.45 | 406.73 | 811.47 | 406.24 | 7 |
| 6  | 718.41  | 359.71 | 701.39  | 351.2  | 700.4   | 350.71 | L | 716.39 | 358.7  | 699.37 | 350.19 | 698.38 | 349.7  | 6 |
| 7  | 789.45  | 395.23 | 772.42  | 386.72 | 771.44  | 386.22 | A | 603.31 | 302.16 | 586.28 | 293.65 | 585.3  | 293.15 | 5 |
| 8  | 918.49  | 459.75 | 901.47  | 451.24 | 900.48  | 450.74 | E | 532.27 | 266.64 | 515.25 | 258.13 | 514.26 | 257.63 | 4 |
| 9  | 1017.56 | 509.28 | 1000.53 | 500.77 | 999.55  | 500.28 | V | 403.23 | 202.12 | 386.2  | 193.61 | 385.22 | 193.11 | 3 |
| 10 | 1146.6  | 573.81 | 1129.58 | 565.29 | 1128.59 | 564.8  | E | 304.16 | 152.58 | 287.13 | 144.07 | 286.15 | 143.58 | 2 |
| 11 |         |        |         |        |         |        | R | 175.12 | 88.06  | 158.09 | 79.55  |        |        | 1 |

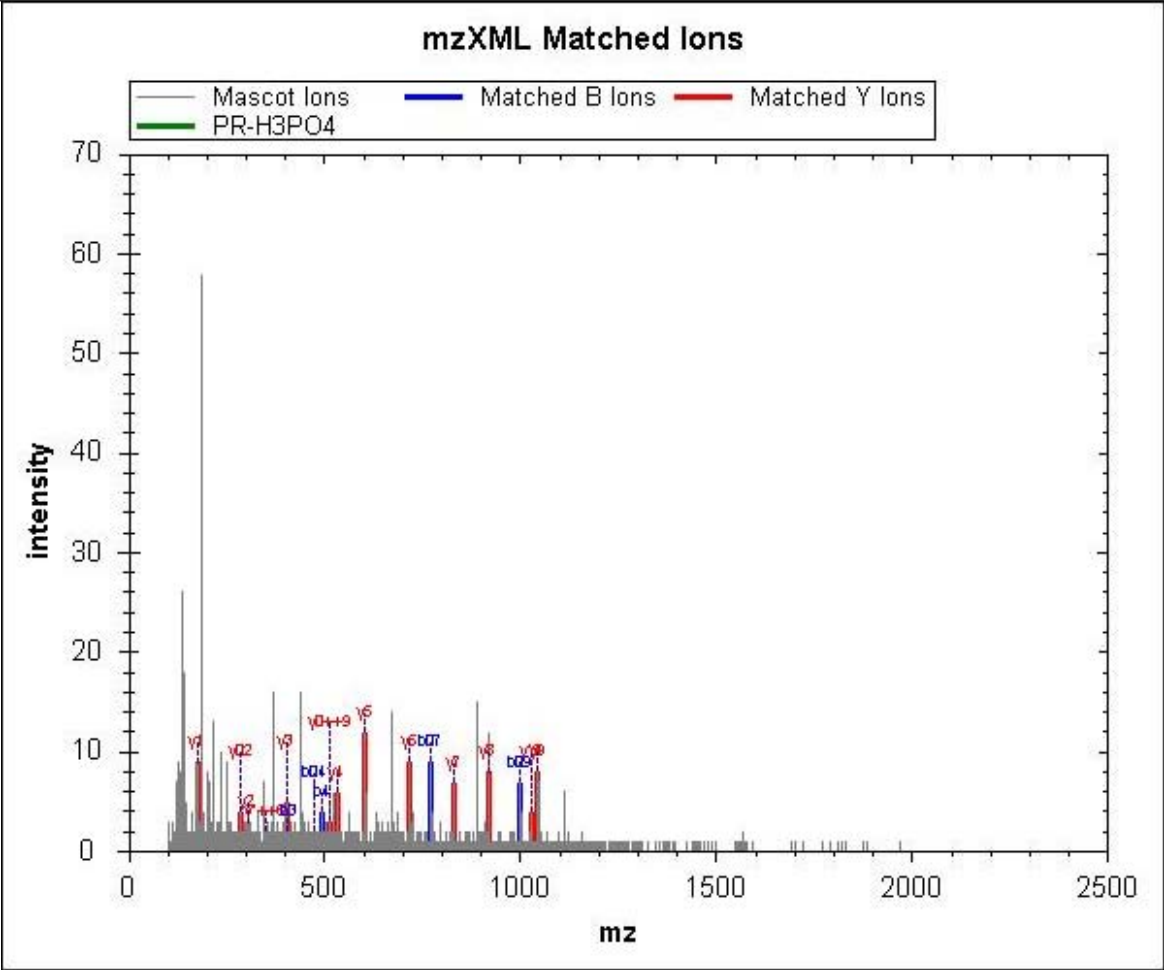

Protein index=1342, ACC No:IPI00001885

Peptide index=6803 MS/MS spectrum

Sequence: LNLFLDLLQSYK, m/z:733.8895, charge:+ 2, Modification: , Mod Position:

Score: 69.19, Raw data:WET\_B3\_090616\_01.mzxml, MS/MS Elution time: 96.44967, Scan number:5368, Mass delta:-0.0535, Rank:1

| No | b      | b++    | b*     | b*++   | b0 | b0++ | Seq | y       | y++    | y*      | y*++   | y0      | y0++   | RevNo |
|----|--------|--------|--------|--------|----|------|-----|---------|--------|---------|--------|---------|--------|-------|
| 1  | 114.09 | 57.55  |        |        |    |      | L   |         |        |         |        |         |        | 12    |
| 2  | 228.13 | 114.57 | 211.11 | 106.06 |    |      | N   | 1353.74 | 677.37 | 1336.71 | 668.86 | 1335.73 | 668.37 | 11    |
| 3  | 341.22 | 171.11 | 324.19 | 162.6  |    |      | L   | 1239.7  | 620.35 | 1222.67 | 611.84 | 1221.69 | 611.35 | 10    |
| 4  | 488.29 | 244.65 | 471.26 | 236.13 |    |      | F   | 1126.61 | 563.81 | 1109.59 | 555.3  | 1108.6  | 554.81 | 9     |
| 5  | 601.37 | 301.19 | 584.34 | 292.68 |    |      | L   | 979.55  | 490.28 | 962.52  | 481.76 | 961.54  | 481.27 | 8     |

|    |         |        |         |        |         |        |   |        |        |        |        |        |        |   |
|----|---------|--------|---------|--------|---------|--------|---|--------|--------|--------|--------|--------|--------|---|
| 6  | 716.4   | 358.7  | 699.37  | 350.19 | 698.39  | 349.7  | D | 866.46 | 433.73 | 849.44 | 425.22 | 848.45 | 424.73 | 7 |
| 7  | 829.48  | 415.24 | 812.46  | 406.73 | 811.47  | 406.24 | L | 751.43 | 376.22 | 734.41 | 367.71 | 733.42 | 367.22 | 6 |
| 8  | 942.57  | 471.79 | 925.54  | 463.27 | 924.56  | 462.78 | L | 638.35 | 319.68 | 621.32 | 311.17 | 620.34 | 310.67 | 5 |
| 9  | 1070.62 | 535.82 | 1053.6  | 527.3  | 1052.61 | 526.81 | Q | 525.27 | 263.14 | 508.24 | 254.62 | 507.26 | 254.13 | 4 |
| 10 | 1157.66 | 579.33 | 1140.63 | 570.82 | 1139.65 | 570.33 | S | 397.21 | 199.11 | 380.18 | 190.59 | 379.2  | 190.1  | 3 |
| 11 | 1320.72 | 660.86 | 1303.69 | 652.35 | 1302.71 | 651.86 | Y | 310.18 | 155.59 | 293.15 | 147.08 |        |        | 2 |
| 12 |         |        |         |        |         |        | K | 147.11 | 74.06  | 130.09 | 65.55  |        |        | 1 |

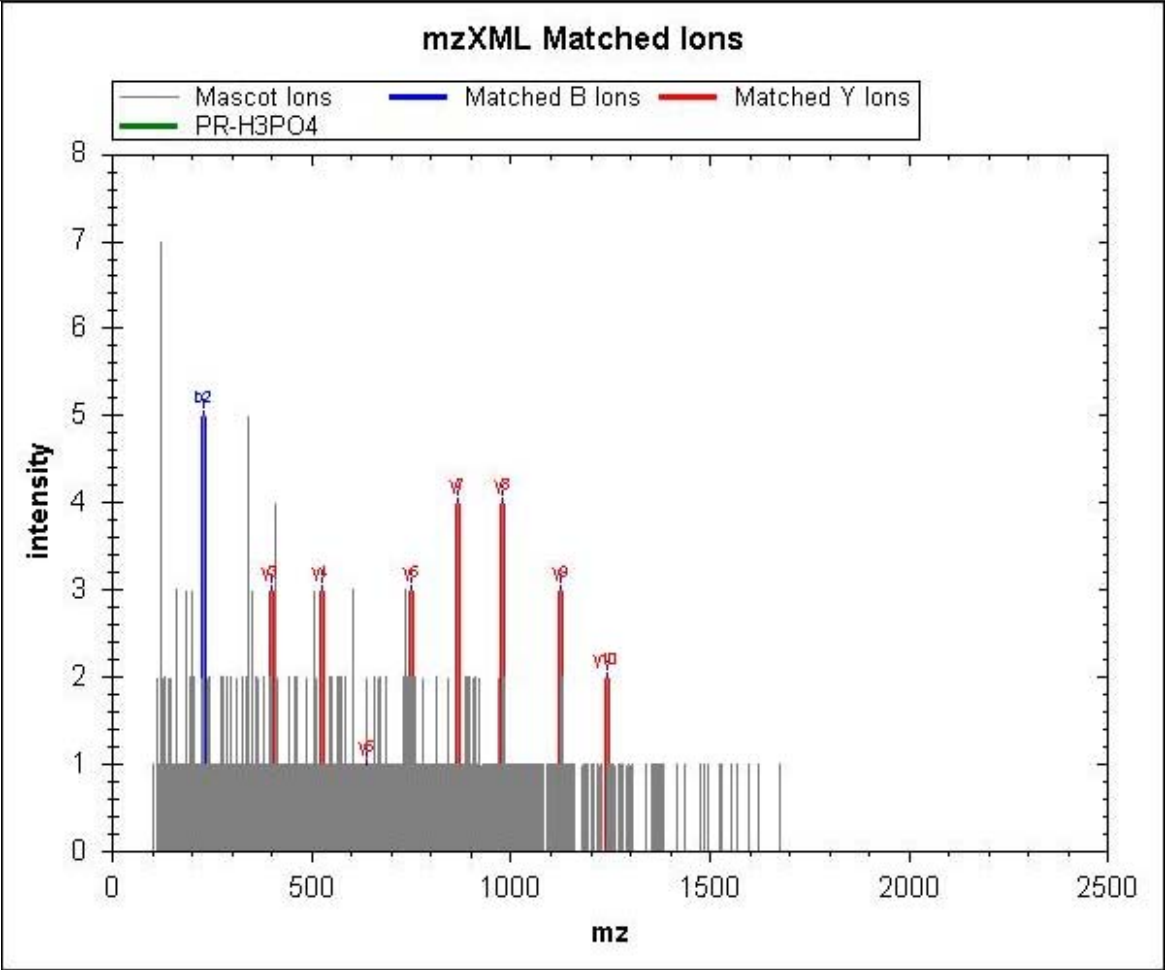

Protein index=1343, ACC No:IPI00298237

Peptide index=6910 MS/MS spectrum

Sequence: VPIPWVSGTSASTPVFGGILSLINEHR, m/z:945.5125, charge:+ 3, Modification: , Mod Position:

Score: 82.79, Raw data:WET\_B3\_090616\_02.mzxml, MS/MS Elution time: 99.90417, Scan number:5609, Mass delta:0.0064, Rank:1

| No | b      | b++    | b* | b*++ | b0 | b0++ | Seq | y       | y++     | y*      | y*++    | y0      | y0++    | RevNo |
|----|--------|--------|----|------|----|------|-----|---------|---------|---------|---------|---------|---------|-------|
| 1  | 100.08 | 50.54  |    |      |    |      | V   |         |         |         |         |         |         | 27    |
| 2  | 197.13 | 99.07  |    |      |    |      | P   | 2735.45 | 1368.23 | 2718.42 | 1359.72 | 2717.44 | 1359.22 | 26    |
| 3  | 310.21 | 155.61 |    |      |    |      | I   | 2638.4  | 1319.7  | 2621.37 | 1311.19 | 2620.39 | 1310.7  | 25    |
| 4  | 407.27 | 204.14 |    |      |    |      | P   | 2525.31 | 1263.16 | 2508.29 | 1254.65 | 2507.3  | 1254.16 | 24    |

|    |         |         |         |         |         |         |   |         |         |         |         |         |         |    |
|----|---------|---------|---------|---------|---------|---------|---|---------|---------|---------|---------|---------|---------|----|
| 5  | 593.34  | 297.18  |         |         |         |         | W | 2428.26 | 1214.63 | 2411.24 | 1206.12 | 2410.25 | 1205.63 | 23 |
| 6  | 692.41  | 346.71  |         |         |         |         | V | 2242.18 | 1121.59 | 2225.16 | 1113.08 | 2224.17 | 1112.59 | 22 |
| 7  | 779.45  | 390.23  |         |         | 761.43  | 381.22  | S | 2143.11 | 1072.06 | 2126.09 | 1063.55 | 2125.1  | 1063.06 | 21 |
| 8  | 836.47  | 418.74  |         |         | 818.46  | 409.73  | G | 2056.08 | 1028.54 | 2039.06 | 1020.03 | 2038.07 | 1019.54 | 20 |
| 9  | 937.51  | 469.26  |         |         | 919.5   | 460.26  | T | 1999.06 | 1000.03 | 1982.03 | 991.52  | 1981.05 | 991.03  | 19 |
| 10 | 1024.55 | 512.78  |         |         | 1006.54 | 503.77  | S | 1898.01 | 949.51  | 1880.99 | 941     | 1880    | 940.5   | 18 |
| 11 | 1095.58 | 548.3   |         |         | 1077.57 | 539.29  | A | 1810.98 | 905.99  | 1793.95 | 897.48  | 1792.97 | 896.99  | 17 |
| 12 | 1182.62 | 591.81  |         |         | 1164.6  | 582.81  | S | 1739.94 | 870.48  | 1722.92 | 861.96  | 1721.93 | 861.47  | 16 |
| 13 | 1283.66 | 642.34  |         |         | 1265.65 | 633.33  | T | 1652.91 | 826.96  | 1635.89 | 818.45  | 1634.9  | 817.95  | 15 |
| 14 | 1380.72 | 690.86  |         |         | 1362.71 | 681.86  | P | 1551.86 | 776.44  | 1534.84 | 767.92  | 1533.85 | 767.43  | 14 |
| 15 | 1479.78 | 740.4   |         |         | 1461.77 | 731.39  | V | 1454.81 | 727.91  | 1437.78 | 719.4   | 1436.8  | 718.9   | 13 |
| 16 | 1626.85 | 813.93  |         |         | 1608.84 | 804.92  | F | 1355.74 | 678.38  | 1338.72 | 669.86  | 1337.73 | 669.37  | 12 |
| 17 | 1683.87 | 842.44  |         |         | 1665.86 | 833.44  | G | 1208.67 | 604.84  | 1191.65 | 596.33  | 1190.66 | 595.84  | 11 |
| 18 | 1740.9  | 870.95  |         |         | 1722.89 | 861.95  | G | 1151.65 | 576.33  | 1134.63 | 567.82  | 1133.64 | 567.32  | 10 |
| 19 | 1853.98 | 927.49  |         |         | 1835.97 | 918.49  | I | 1094.63 | 547.82  | 1077.61 | 539.31  | 1076.62 | 538.81  | 9  |
| 20 | 1967.06 | 984.04  |         |         | 1949.05 | 975.03  | L | 981.55  | 491.28  | 964.52  | 482.76  | 963.54  | 482.27  | 8  |
| 21 | 2054.1  | 1027.55 |         |         | 2036.09 | 1018.55 | S | 868.46  | 434.74  | 851.44  | 426.22  | 850.45  | 425.73  | 7  |
| 22 | 2167.18 | 1084.09 |         |         | 2149.17 | 1075.09 | L | 781.43  | 391.22  | 764.4   | 382.71  | 763.42  | 382.21  | 6  |
| 23 | 2280.26 | 1140.64 |         |         | 2262.25 | 1131.63 | I | 668.35  | 334.68  | 651.32  | 326.16  | 650.34  | 325.67  | 5  |
| 24 | 2394.31 | 1197.66 | 2377.28 | 1189.14 | 2376.3  | 1188.65 | N | 555.26  | 278.14  | 538.24  | 269.62  | 537.25  | 269.13  | 4  |
| 25 | 2523.35 | 1262.18 | 2506.32 | 1253.67 | 2505.34 | 1253.17 | E | 441.22  | 221.11  | 424.19  | 212.6   | 423.21  | 212.11  | 3  |
| 26 | 2660.41 | 1330.71 | 2643.38 | 1322.19 | 2642.4  | 1321.7  | H | 312.18  | 156.59  | 295.15  | 148.08  |         |         | 2  |
| 27 |         |         |         |         |         |         | R | 175.12  | 88.06   | 158.09  | 79.55   |         |         | 1  |

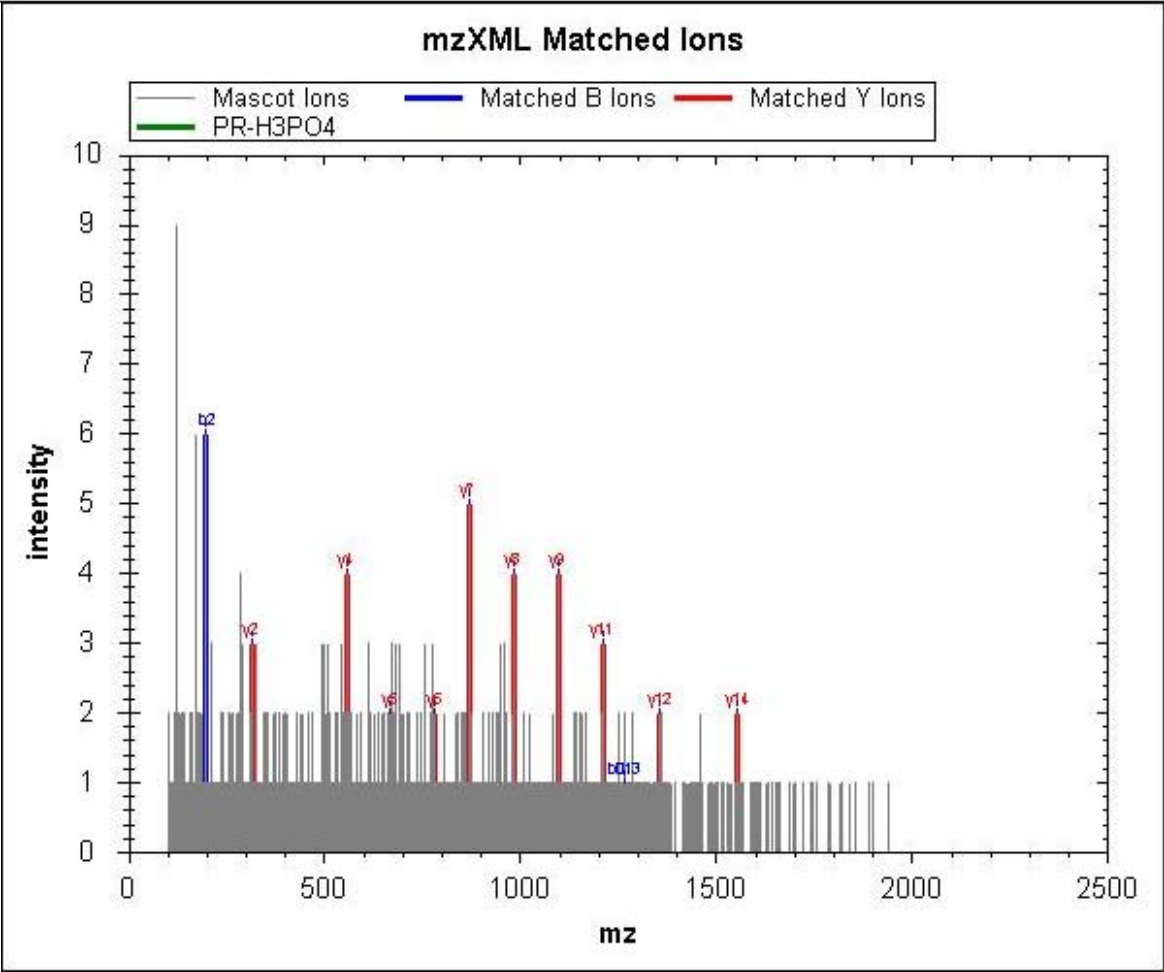

Protein index=1345, ACC No:IP100747596

Peptide index=1743 MS/MS spectrum

Sequence: LSLALSPR, m/z:428.7621, charge:+ 2, Modification: , Mod Position:

Score: 35, Raw data:WET\_B3\_090616\_02.mzxml, MS/MS Elution time: 35.8025, Scan number:1855, Mass delta:-0.0082, Rank:1

| No | b      | b++    | b0     | b0++   | Seq | y      | y++    | y*     | y*++   | y0     | y0++   | RevNo |
|----|--------|--------|--------|--------|-----|--------|--------|--------|--------|--------|--------|-------|
| 1  | 114.09 | 57.55  |        |        | L   |        |        |        |        |        |        | 8     |
| 2  | 201.12 | 101.07 | 183.11 | 92.06  | S   | 743.44 | 372.22 | 726.41 | 363.71 | 725.43 | 363.22 | 7     |
| 3  | 314.21 | 157.61 | 296.2  | 148.6  | L   | 656.41 | 328.71 | 639.38 | 320.19 | 638.4  | 319.7  | 6     |
| 4  | 385.24 | 193.13 | 367.23 | 184.12 | A   | 543.32 | 272.17 | 526.3  | 263.65 | 525.31 | 263.16 | 5     |
| 5  | 498.33 | 249.67 | 480.32 | 240.66 | L   | 472.29 | 236.65 | 455.26 | 228.13 | 454.28 | 227.64 | 4     |
| 6  | 585.36 | 293.18 | 567.35 | 284.18 | S   | 359.2  | 180.11 | 342.18 | 171.59 | 341.19 | 171.1  | 3     |
| 7  | 682.41 | 341.71 | 664.4  | 332.71 | P   | 272.17 | 136.59 | 255.15 | 128.08 |        |        | 2     |
| 8  |        |        |        |        | R   | 175.12 | 88.06  | 158.09 | 79.55  |        |        | 1     |

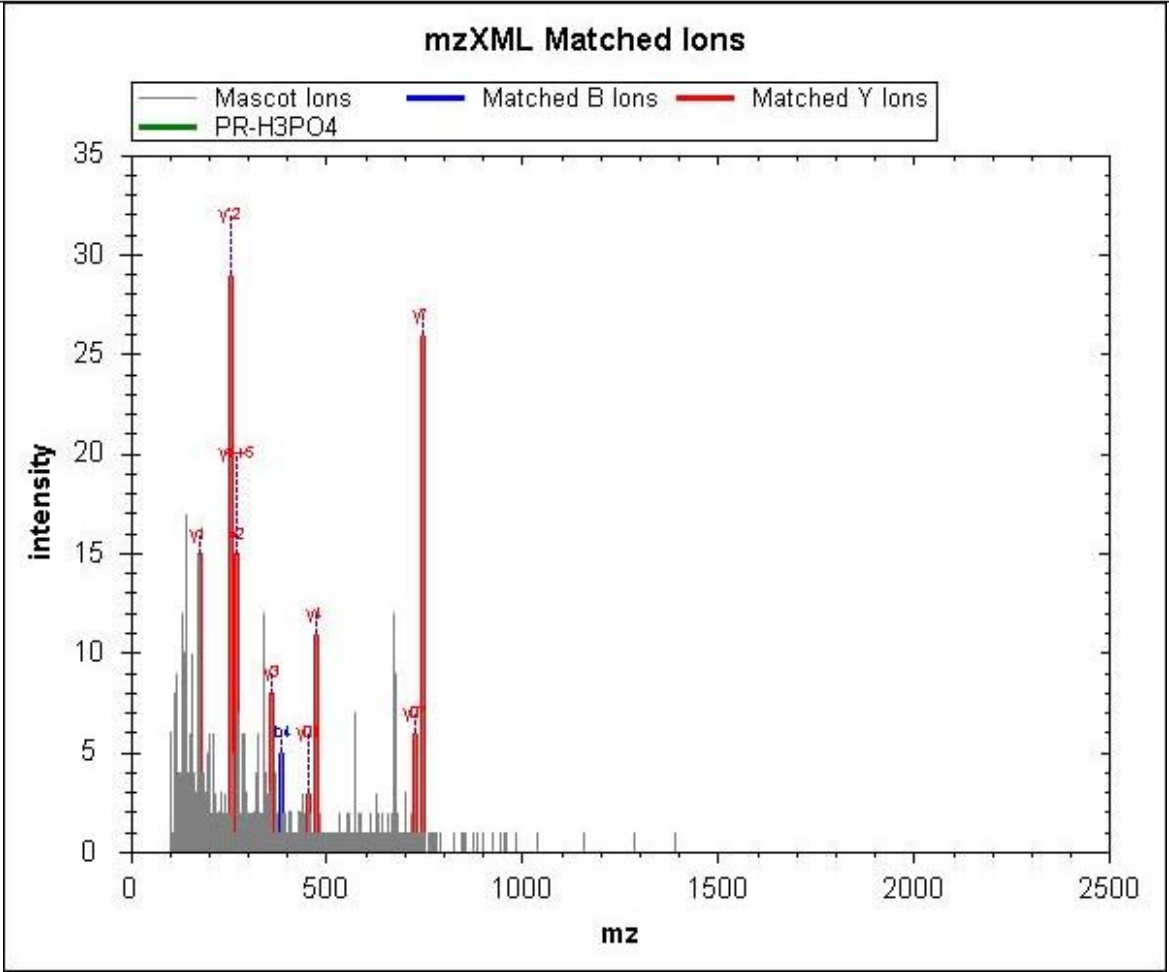

Protein index=1347, ACC No: IPI00298828

Peptide index=2945 MS/MS spectrum

Sequence: EHSSLAFWK, m/z:552.7722, charge:+ 2, Modification: , Mod Position:

Score: 39.81, Raw data:WET\_B3\_090616\_01.mzxml, MS/MS Elution time: 48.60217, Scan number:2589, Mass delta:-0.0101, Rank:1

| No | b      | b++    | b0     | b0++   | Seq | y      | y++    | y*     | y*++   | y0     | y0++   | RevNo |
|----|--------|--------|--------|--------|-----|--------|--------|--------|--------|--------|--------|-------|
| 1  | 130.05 | 65.53  | 112.04 | 56.52  | E   |        |        |        |        |        |        | 9     |
| 2  | 267.11 | 134.06 | 249.1  | 125.05 | H   | 975.5  | 488.26 | 958.48 | 479.74 | 957.49 | 479.25 | 8     |
| 3  | 354.14 | 177.57 | 336.13 | 168.57 | S   | 838.45 | 419.73 | 821.42 | 411.21 | 820.44 | 410.72 | 7     |
| 4  | 441.17 | 221.09 | 423.16 | 212.08 | S   | 751.41 | 376.21 | 734.39 | 367.7  | 733.4  | 367.21 | 6     |
| 5  | 554.26 | 277.63 | 536.25 | 268.63 | L   | 664.38 | 332.69 | 647.36 | 324.18 |        |        | 5     |
| 6  | 625.29 | 313.15 | 607.28 | 304.15 | A   | 551.3  | 276.15 | 534.27 | 267.64 |        |        | 4     |
| 7  | 772.36 | 386.68 | 754.35 | 377.68 | F   | 480.26 | 240.63 | 463.23 | 232.12 |        |        | 3     |
| 8  | 958.44 | 479.72 | 940.43 | 470.72 | W   | 333.19 | 167.1  | 316.17 | 158.59 |        |        | 2     |
| 9  |        |        |        |        | K   | 147.11 | 74.06  | 130.09 | 65.55  |        |        | 1     |

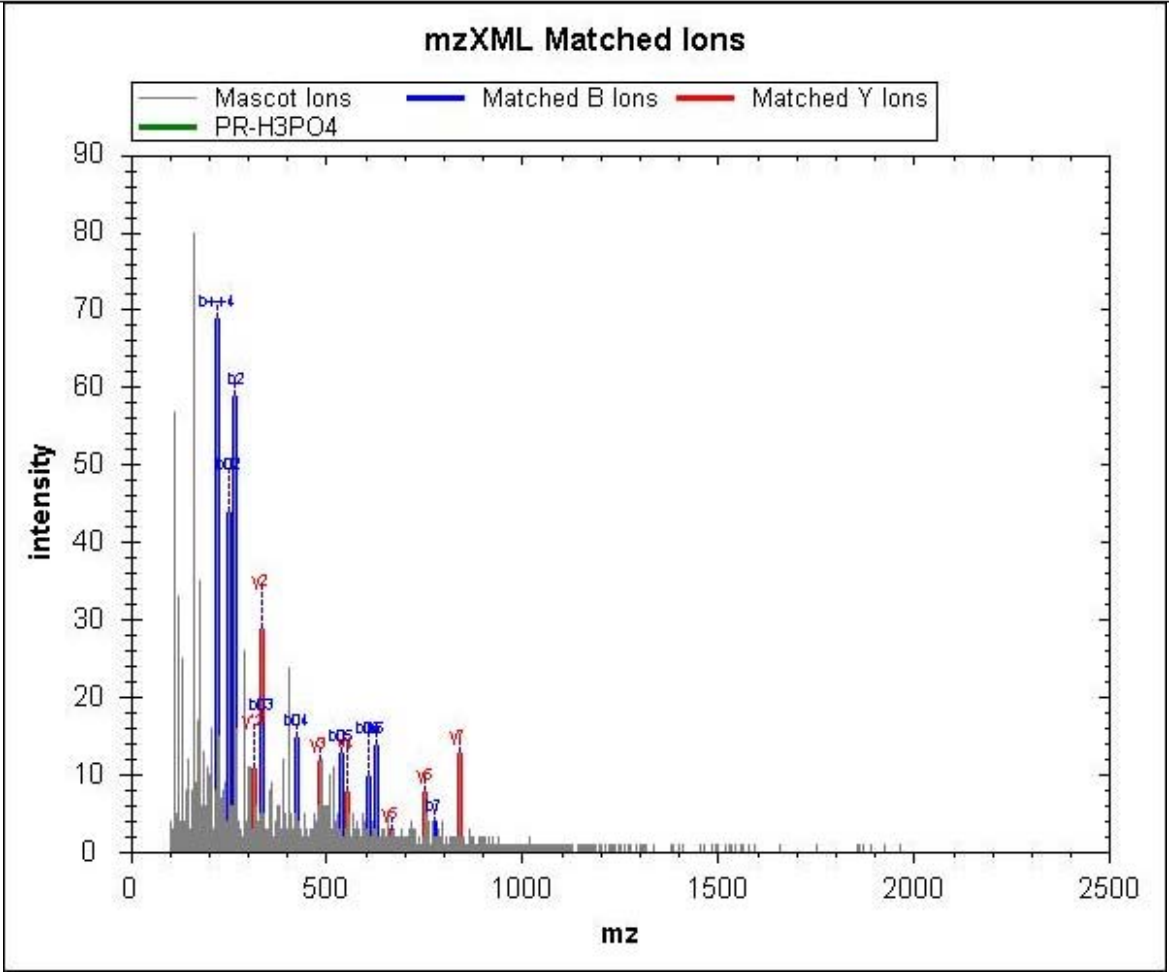

Protein index=1348, ACC No: IPI00005677

Peptide index=7100 MS/MS spectrum

Sequence: FGLLNIVMEPFFK, m/z: 777.9252, charge: + 2, Modification: , Mod Position:

Score: 40.12, Raw data: WET\_B3\_090616\_01.mzxml, MS/MS Elution time: 106.951, Scan number: 5990, Mass delta: 0.0042, Rank: 1

| No | b       | b++    | b*      | b*++   | b0      | b0++   | Seq | y       | y++    | y*      | y*++   | y0      | y0++   | RevNo |
|----|---------|--------|---------|--------|---------|--------|-----|---------|--------|---------|--------|---------|--------|-------|
| 1  | 148.08  | 74.54  |         |        |         |        | F   |         |        |         |        |         |        | 13    |
| 2  | 205.1   | 103.05 |         |        |         |        | G   | 1407.77 | 704.39 | 1390.74 | 695.88 | 1389.76 | 695.38 | 12    |
| 3  | 318.18  | 159.59 |         |        |         |        | L   | 1350.75 | 675.88 | 1333.72 | 667.36 | 1332.74 | 666.87 | 11    |
| 4  | 431.27  | 216.14 |         |        |         |        | L   | 1237.66 | 619.34 | 1220.64 | 610.82 | 1219.65 | 610.33 | 10    |
| 5  | 545.31  | 273.16 | 528.28  | 264.64 |         |        | N   | 1124.58 | 562.79 | 1107.55 | 554.28 | 1106.57 | 553.79 | 9     |
| 6  | 658.39  | 329.7  | 641.37  | 321.19 |         |        | I   | 1010.54 | 505.77 | 993.51  | 497.26 | 992.53  | 496.77 | 8     |
| 7  | 757.46  | 379.23 | 740.43  | 370.72 |         |        | V   | 897.45  | 449.23 | 880.43  | 440.72 | 879.44  | 440.23 | 7     |
| 8  | 888.5   | 444.75 | 871.47  | 436.24 |         |        | M   | 798.39  | 399.7  | 781.36  | 391.18 | 780.37  | 390.69 | 6     |
| 9  | 1017.54 | 509.28 | 1000.52 | 500.76 | 999.53  | 500.27 | E   | 667.34  | 334.18 | 650.32  | 325.66 | 649.33  | 325.17 | 5     |
| 10 | 1114.6  | 557.8  | 1097.57 | 549.29 | 1096.59 | 548.8  | P   | 538.3   | 269.65 | 521.28  | 261.14 |         |        | 4     |
| 11 | 1261.67 | 631.34 | 1244.64 | 622.82 | 1243.65 | 622.33 | F   | 441.25  | 221.13 | 424.22  | 212.62 |         |        | 3     |
| 12 | 1408.73 | 704.87 | 1391.71 | 696.36 | 1390.72 | 695.87 | F   | 294.18  | 147.59 | 277.15  | 139.08 |         |        | 2     |

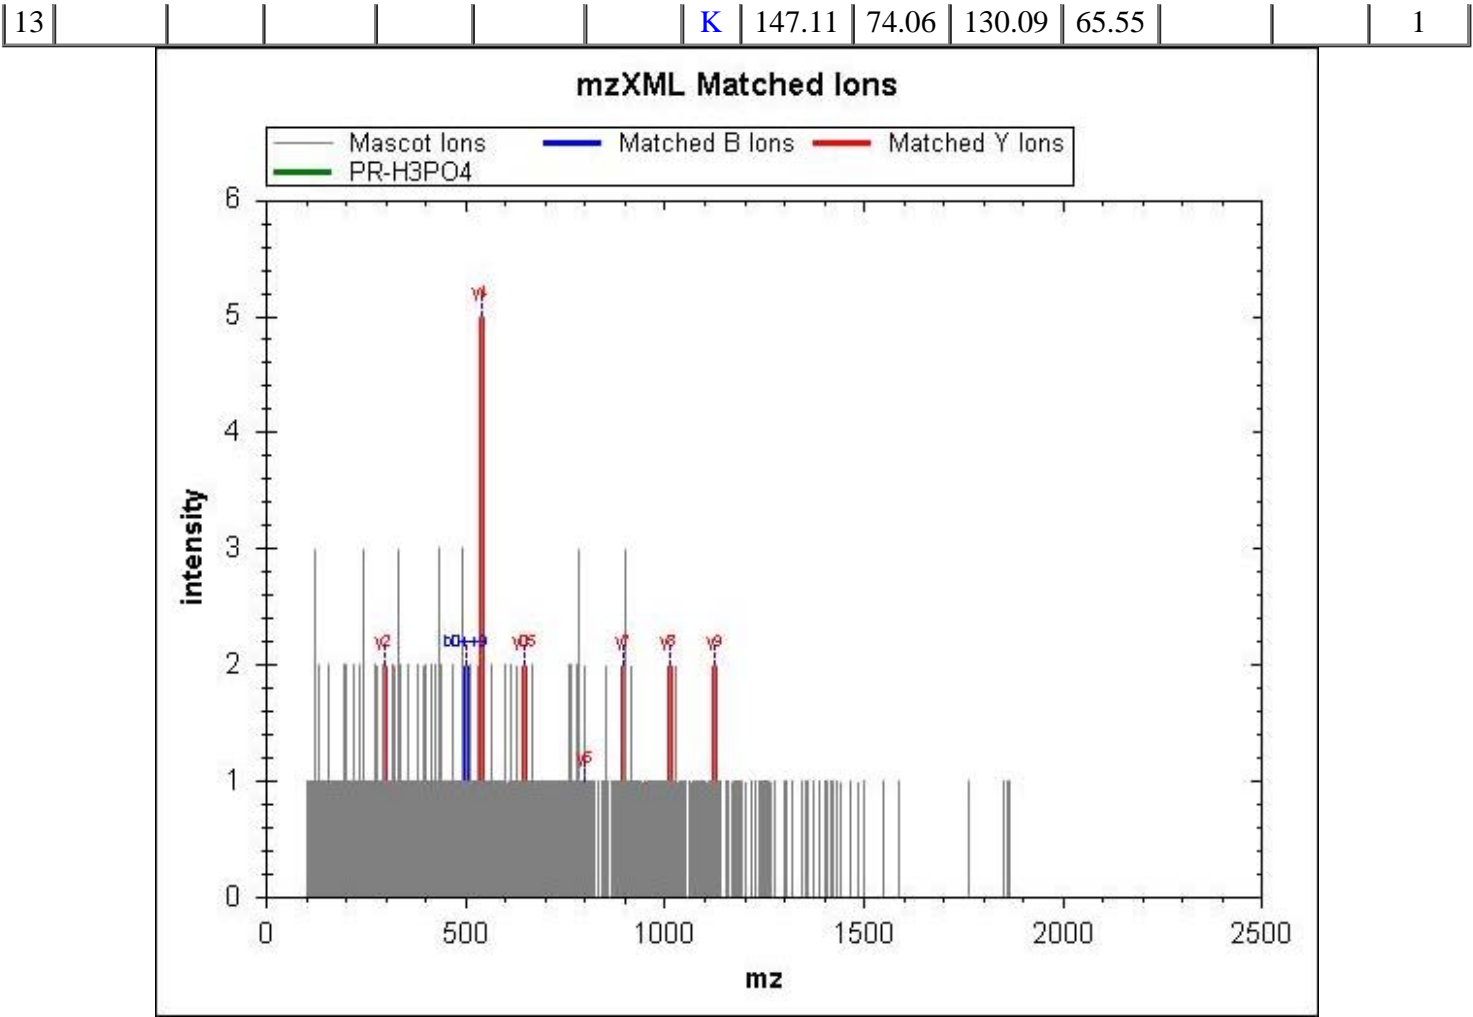

Protein index=1349, ACC No: IPI00414442

Peptide index=6682 MS/MS spectrum

Sequence: DNTYLVELSSLLVR, m/z:811.4422, charge:+ 2, Modification: , Mod Position:

Score: 58.96, Raw data:WET\_B3\_090616\_03.mzxml, MS/MS Elution time: 94.02516, Scan number:5260, Mass delta:0.0037, Rank:1

| No | b       | b++    | b*      | b*++   | b0      | b0++   | Seq | y       | y++    | y*      | y*++   | y0      | y0++   | RevNo |
|----|---------|--------|---------|--------|---------|--------|-----|---------|--------|---------|--------|---------|--------|-------|
| 1  | 116.03  | 58.52  |         |        | 98.02   | 49.52  | D   |         |        |         |        |         |        | 14    |
| 2  | 230.08  | 115.54 | 213.05  | 107.03 | 212.07  | 106.54 | N   | 1506.85 | 753.93 | 1489.83 | 745.42 | 1488.84 | 744.92 | 13    |
| 3  | 331.12  | 166.07 | 314.1   | 157.55 | 313.11  | 157.06 | T   | 1392.81 | 696.91 | 1375.78 | 688.4  | 1374.8  | 687.9  | 12    |
| 4  | 494.19  | 247.6  | 477.16  | 239.08 | 476.18  | 238.59 | Y   | 1291.76 | 646.38 | 1274.74 | 637.87 | 1273.75 | 637.38 | 11    |
| 5  | 607.27  | 304.14 | 590.25  | 295.63 | 589.26  | 295.13 | L   | 1128.7  | 564.85 | 1111.67 | 556.34 | 1110.69 | 555.85 | 10    |
| 6  | 706.34  | 353.67 | 689.31  | 345.16 | 688.33  | 344.67 | V   | 1015.61 | 508.31 | 998.59  | 499.8  | 997.6   | 499.31 | 9     |
| 7  | 835.38  | 418.2  | 818.36  | 409.68 | 817.37  | 409.19 | E   | 916.55  | 458.78 | 899.52  | 450.26 | 898.54  | 449.77 | 8     |
| 8  | 948.47  | 474.74 | 931.44  | 466.22 | 930.46  | 465.73 | L   | 787.5   | 394.26 | 770.48  | 385.74 | 769.49  | 385.25 | 7     |
| 9  | 1035.5  | 518.25 | 1018.47 | 509.74 | 1017.49 | 509.25 | S   | 674.42  | 337.71 | 657.39  | 329.2  | 656.41  | 328.71 | 6     |
| 10 | 1122.53 | 561.77 | 1105.5  | 553.26 | 1104.52 | 552.76 | S   | 587.39  | 294.2  | 570.36  | 285.68 | 569.38  | 285.19 | 5     |
| 11 | 1235.62 | 618.31 | 1218.59 | 609.8  | 1217.6  | 609.31 | L   | 500.36  | 250.68 | 483.33  | 242.17 |         |        | 4     |

|    |         |        |         |        |         |        |   |        |        |        |        |  |  |   |
|----|---------|--------|---------|--------|---------|--------|---|--------|--------|--------|--------|--|--|---|
| 12 | 1348.7  | 674.85 | 1331.67 | 666.34 | 1330.69 | 665.85 | L | 387.27 | 194.14 | 370.24 | 185.63 |  |  | 3 |
| 13 | 1447.77 | 724.39 | 1430.74 | 715.87 | 1429.76 | 715.38 | V | 274.19 | 137.6  | 257.16 | 129.08 |  |  | 2 |
| 14 |         |        |         |        |         |        | R | 175.12 | 88.06  | 158.09 | 79.55  |  |  | 1 |

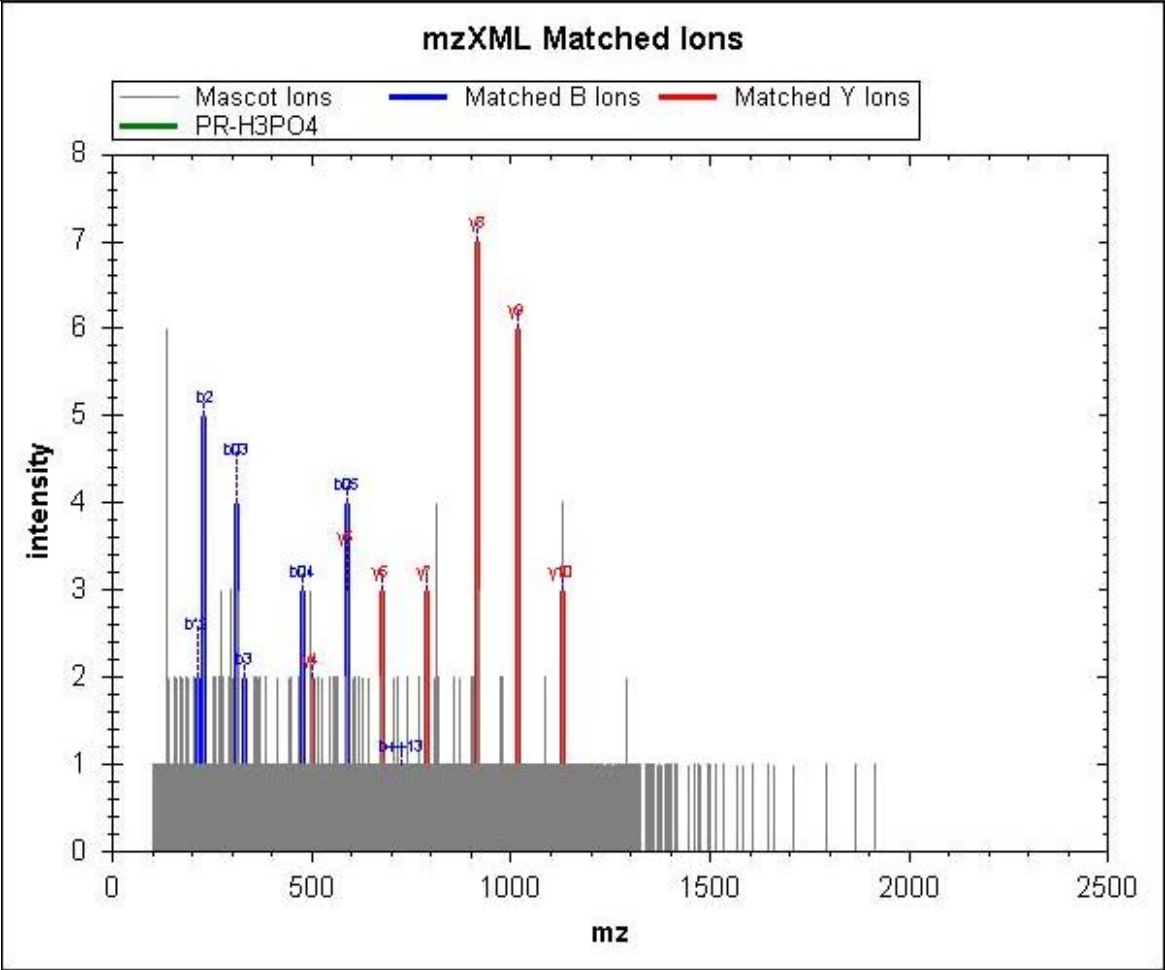

Protein index=1350, ACC No: IPI00007750

Peptide index=5557 MS/MS spectrum

Sequence: AVFVDLEPTVIDEIR, m/z:858.4291, charge:+ 2, Modification: , Mod Position:

Score: 104.97, Raw data:WET\_B3\_090616\_03.mzxml, MS/MS Elution time: 74.9635, Scan number:4144, Mass delta:-0.0297, Rank:1

| No | b      | b++    | b0     | b0++   | Seq | y       | y++    | y*      | y*++   | y0      | y0++   | RevNo |
|----|--------|--------|--------|--------|-----|---------|--------|---------|--------|---------|--------|-------|
| 1  | 72.04  | 36.53  |        |        | A   |         |        |         |        |         |        | 15    |
| 2  | 171.11 | 86.06  |        |        | V   | 1644.88 | 822.95 | 1627.86 | 814.43 | 1626.87 | 813.94 | 14    |
| 3  | 318.18 | 159.59 |        |        | F   | 1545.82 | 773.41 | 1528.79 | 764.9  | 1527.81 | 764.41 | 13    |
| 4  | 417.25 | 209.13 |        |        | V   | 1398.75 | 699.88 | 1381.72 | 691.36 | 1380.74 | 690.87 | 12    |
| 5  | 532.28 | 266.64 | 514.27 | 257.64 | D   | 1299.68 | 650.34 | 1282.65 | 641.83 | 1281.67 | 641.34 | 11    |
| 6  | 645.36 | 323.18 | 627.35 | 314.18 | L   | 1184.65 | 592.83 | 1167.63 | 584.32 | 1166.64 | 583.82 | 10    |
| 7  | 774.4  | 387.71 | 756.39 | 378.7  | E   | 1071.57 | 536.29 | 1054.54 | 527.77 | 1053.56 | 527.28 | 9     |
| 8  | 871.46 | 436.23 | 853.45 | 427.23 | P   | 942.53  | 471.77 | 925.5   | 463.25 | 924.51  | 462.76 | 8     |
| 9  | 972.5  | 486.76 | 954.49 | 477.75 | T   | 845.47  | 423.24 | 828.45  | 414.73 | 827.46  | 414.23 | 7     |

|    |         |        |         |        |   |        |        |        |        |        |        |   |
|----|---------|--------|---------|--------|---|--------|--------|--------|--------|--------|--------|---|
| 10 | 1071.57 | 536.29 | 1053.56 | 527.28 | V | 744.42 | 372.72 | 727.4  | 364.2  | 726.41 | 363.71 | 6 |
| 11 | 1184.66 | 592.83 | 1166.65 | 583.83 | I | 645.36 | 323.18 | 628.33 | 314.67 | 627.35 | 314.18 | 5 |
| 12 | 1299.68 | 650.35 | 1281.67 | 641.34 | D | 532.27 | 266.64 | 515.25 | 258.13 | 514.26 | 257.63 | 4 |
| 13 | 1428.73 | 714.87 | 1410.72 | 705.86 | E | 417.25 | 209.13 | 400.22 | 200.61 | 399.24 | 200.12 | 3 |
| 14 | 1541.81 | 771.41 | 1523.8  | 762.4  | I | 288.2  | 144.61 | 271.18 | 136.09 |        |        | 2 |
| 15 |         |        |         |        | R | 175.12 | 88.06  | 158.09 | 79.55  |        |        | 1 |

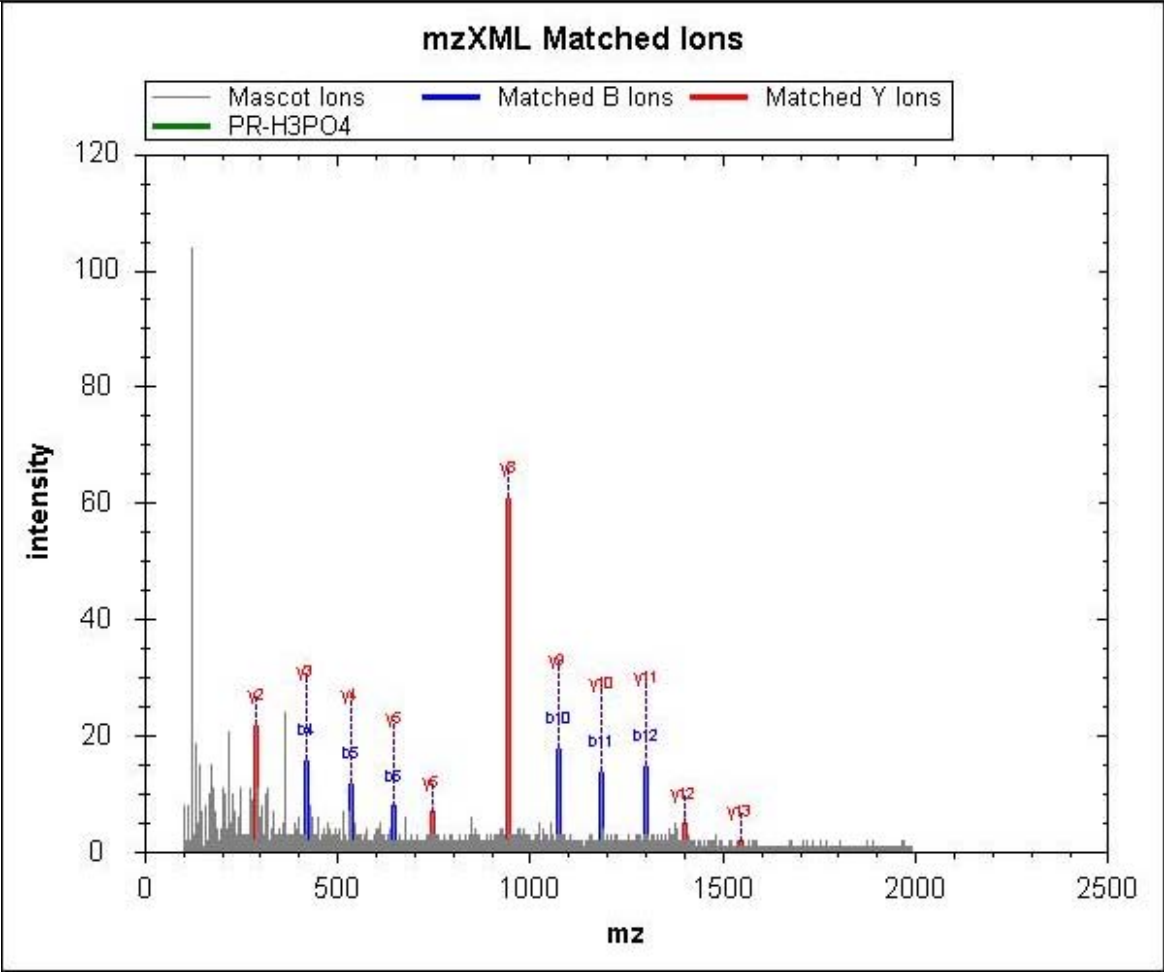

Protein index=1351, ACC No: IPI00401264

Peptide index=3355 MS/MS spectrum

Sequence: DLAEITTLDR, m/z:573.8023, charge:+ 2, Modification: , Mod Position:

Score: 35.65, Raw data:WET\_B3\_090616\_01.mzxml, MS/MS Elution time: 51.82583, Scan number:2776, Mass delta:-0.0027, Rank:1

| No | b      | b++    | b0     | b0++   | Seq | y       | y++    | y*      | y*++   | y0      | y0++   | RevNo |
|----|--------|--------|--------|--------|-----|---------|--------|---------|--------|---------|--------|-------|
| 1  | 116.03 | 58.52  | 98.02  | 49.52  | D   |         |        |         |        |         |        | 10    |
| 2  | 229.12 | 115.06 | 211.11 | 106.06 | L   | 1031.57 | 516.29 | 1014.55 | 507.78 | 1013.56 | 507.28 | 9     |
| 3  | 300.16 | 150.58 | 282.14 | 141.58 | A   | 918.49  | 459.75 | 901.46  | 451.23 | 900.48  | 450.74 | 8     |
| 4  | 429.2  | 215.1  | 411.19 | 206.1  | E   | 847.45  | 424.23 | 830.43  | 415.72 | 829.44  | 415.22 | 7     |
| 5  | 542.28 | 271.64 | 524.27 | 262.64 | I   | 718.41  | 359.71 | 701.38  | 351.2  | 700.4   | 350.7  | 6     |
| 6  | 643.33 | 322.17 | 625.32 | 313.16 | T   | 605.33  | 303.17 | 588.3   | 294.65 | 587.31  | 294.16 | 5     |

|    |        |        |        |        |   |        |        |        |        |        |        |   |
|----|--------|--------|--------|--------|---|--------|--------|--------|--------|--------|--------|---|
| 7  | 744.38 | 372.69 | 726.37 | 363.69 | T | 504.28 | 252.64 | 487.25 | 244.13 | 486.27 | 243.64 | 4 |
| 8  | 857.46 | 429.23 | 839.45 | 420.23 | L | 403.23 | 202.12 | 386.2  | 193.61 | 385.22 | 193.11 | 3 |
| 9  | 972.49 | 486.75 | 954.48 | 477.74 | D | 290.15 | 145.58 | 273.12 | 137.06 | 272.14 | 136.57 | 2 |
| 10 |        |        |        |        | R | 175.12 | 88.06  | 158.09 | 79.55  |        |        | 1 |

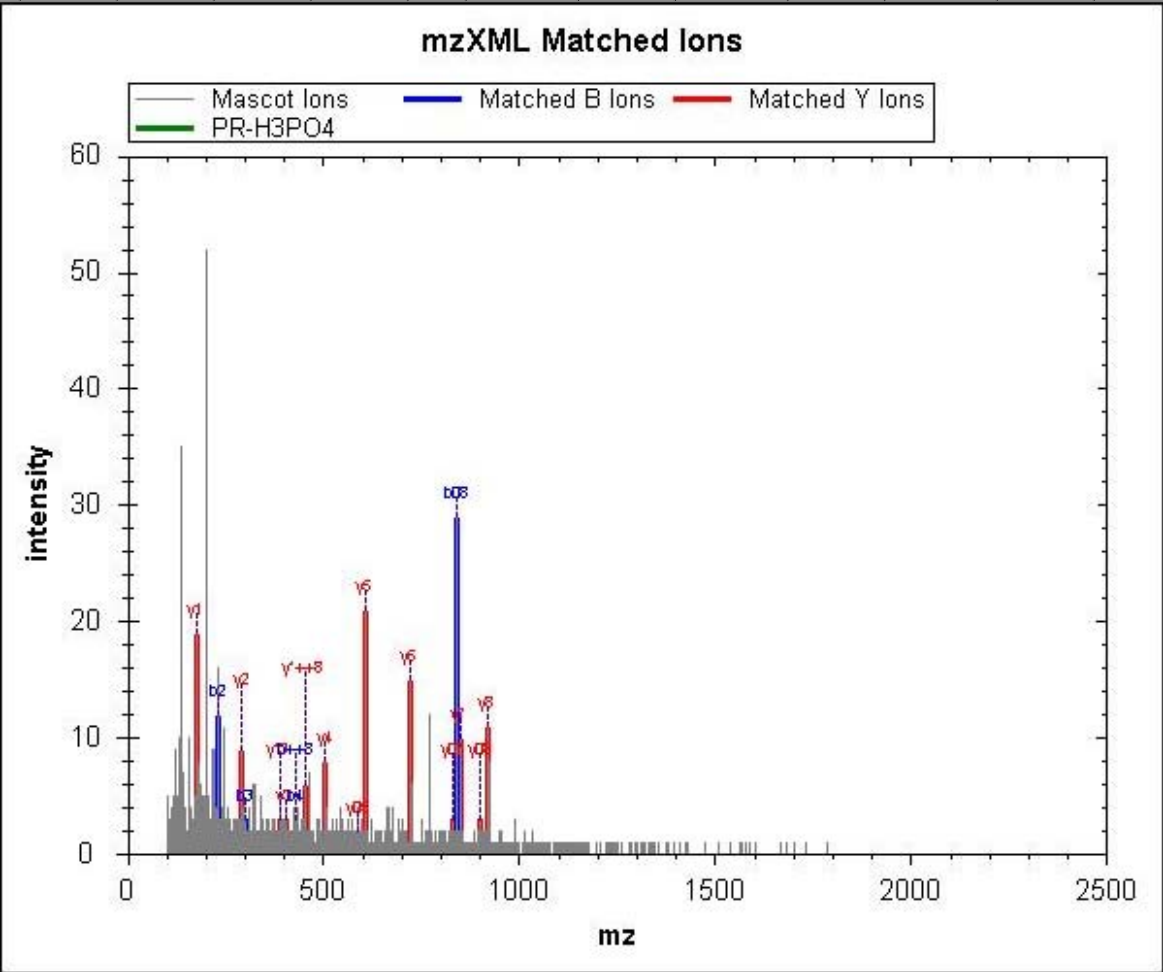

Protein index=1352, ACC No:IPI00298625

Peptide index=5418 MS/MS spectrum

Sequence: LNTLETEEWFFK, m/z:778.886, charge:+ 2, Modification: , Mod Position:

Score: 53.92, Raw data:WET\_B3\_090616\_02.mzxml, MS/MS Elution time: 73.23017, Scan number:4047, Mass delta:0.0097, Rank:1

[illegible]

|    |         |        |         |        |         |        |   |        |        |        |        |  |  |   |
|----|---------|--------|---------|--------|---------|--------|---|--------|--------|--------|--------|--|--|---|
| 9  | 1116.52 | 558.76 | 1099.49 | 550.25 | 1098.51 | 549.76 | W | 627.33 | 314.17 | 610.3  | 305.65 |  |  | 4 |
| 10 | 1263.59 | 632.3  | 1246.56 | 623.79 | 1245.58 | 623.29 | F | 441.25 | 221.13 | 424.22 | 212.62 |  |  | 3 |
| 11 | 1410.66 | 705.83 | 1393.63 | 697.32 | 1392.65 | 696.83 | F | 294.18 | 147.59 | 277.15 | 139.08 |  |  | 2 |
| 12 |         |        |         |        |         |        | K | 147.11 | 74.06  | 130.09 | 65.55  |  |  | 1 |

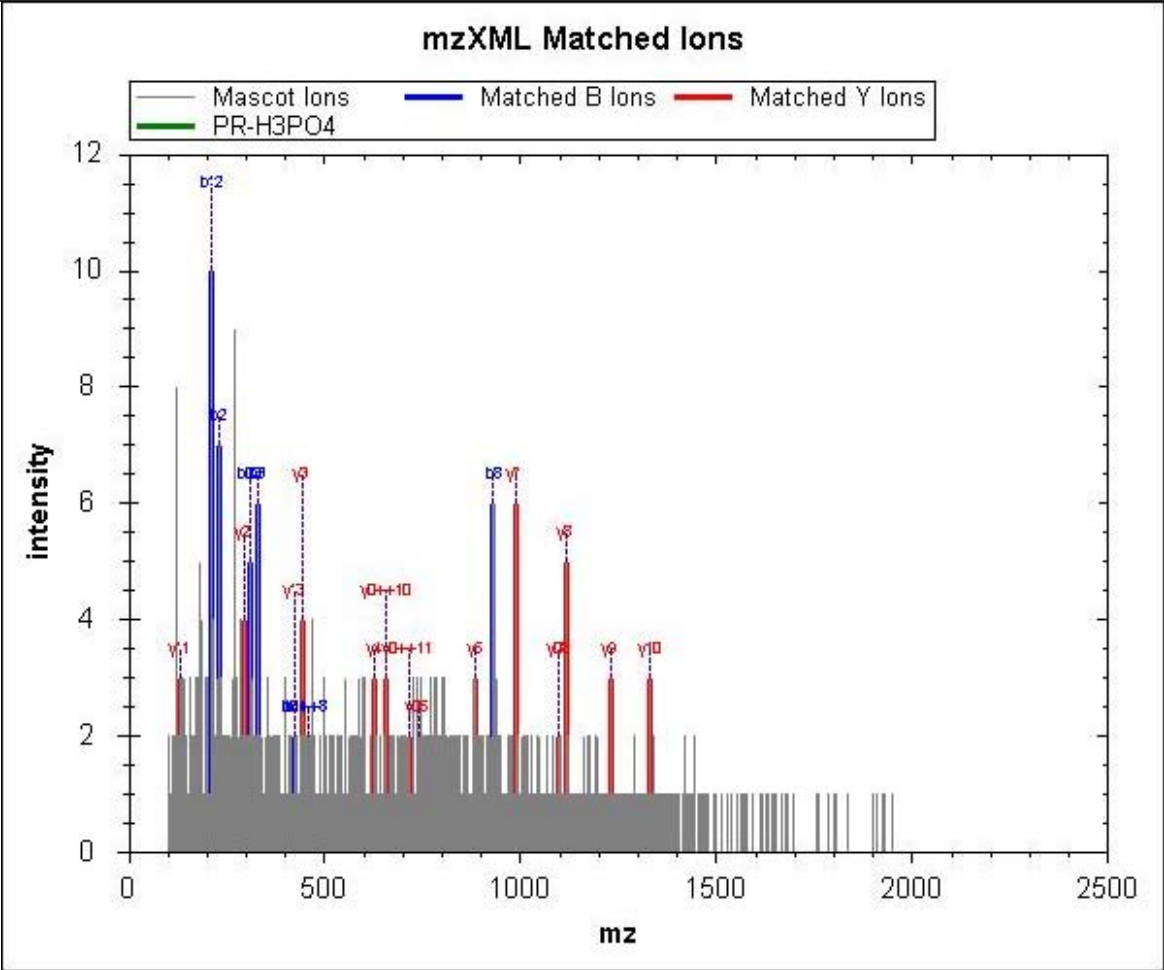

Protein index=1353, ACC No: IPI00025100

Peptide index=3529 MS/MS spectrum

Sequence: VDGNDVFAVYNATK, m/z:756.872, charge:+ 2, Modification: , Mod Position:

Score: 78.21, Raw data:WET\_B3\_090616\_01.mzxml, MS/MS Elution time: 53.37634, Scan number:2866, Mass delta:0.0038, Rank:1

| No | b      | b++    | b*     | b*++   | b0     | b0++   | Seq | y       | y++    | y*      | y*++   | y0      | y0++   | RevNo |
|----|--------|--------|--------|--------|--------|--------|-----|---------|--------|---------|--------|---------|--------|-------|
| 1  | 100.08 | 50.54  |        |        |        |        | V   |         |        |         |        |         |        | 14    |
| 2  | 215.1  | 108.05 |        |        | 197.09 | 99.05  | D   | 1413.66 | 707.34 | 1396.64 | 698.82 | 1395.65 | 698.33 | 13    |
| 3  | 272.12 | 136.57 |        |        | 254.11 | 127.56 | G   | 1298.64 | 649.82 | 1281.61 | 641.31 | 1280.63 | 640.82 | 12    |
| 4  | 386.17 | 193.59 | 369.14 | 185.07 | 368.16 | 184.58 | N   | 1241.62 | 621.31 | 1224.59 | 612.8  | 1223.61 | 612.31 | 11    |
| 5  | 501.19 | 251.1  | 484.17 | 242.59 | 483.18 | 242.1  | D   | 1127.57 | 564.29 | 1110.55 | 555.78 | 1109.56 | 555.28 | 10    |
| 6  | 600.26 | 300.63 | 583.24 | 292.12 | 582.25 | 291.63 | V   | 1012.55 | 506.78 | 995.52  | 498.26 | 994.54  | 497.77 | 9     |
| 7  | 747.33 | 374.17 | 730.3  | 365.66 | 729.32 | 365.16 | F   | 913.48  | 457.24 | 896.45  | 448.73 | 895.47  | 448.24 | 8     |
| 8  | 818.37 | 409.69 | 801.34 | 401.17 | 800.36 | 400.68 | A   | 766.41  | 383.71 | 749.38  | 375.2  | 748.4   | 374.7  | 7     |

|    |         |        |         |        |         |        |   |        |        |        |        |        |        |   |
|----|---------|--------|---------|--------|---------|--------|---|--------|--------|--------|--------|--------|--------|---|
| 9  | 917.44  | 459.22 | 900.41  | 450.71 | 899.43  | 450.22 | V | 695.37 | 348.19 | 678.35 | 339.68 | 677.36 | 339.18 | 6 |
| 10 | 1080.5  | 540.75 | 1063.47 | 532.24 | 1062.49 | 531.75 | Y | 596.3  | 298.66 | 579.28 | 290.14 | 578.29 | 289.65 | 5 |
| 11 | 1194.54 | 597.78 | 1177.52 | 589.26 | 1176.53 | 588.77 | N | 433.24 | 217.12 | 416.21 | 208.61 | 415.23 | 208.12 | 4 |
| 12 | 1265.58 | 633.29 | 1248.55 | 624.78 | 1247.57 | 624.29 | A | 319.2  | 160.1  | 302.17 | 151.59 | 301.19 | 151.1  | 3 |
| 13 | 1366.63 | 683.82 | 1349.6  | 675.3  | 1348.62 | 674.81 | T | 248.16 | 124.58 | 231.13 | 116.07 | 230.15 | 115.58 | 2 |
| 14 |         |        |         |        |         |        | K | 147.11 | 74.06  | 130.09 | 65.55  |        |        | 1 |

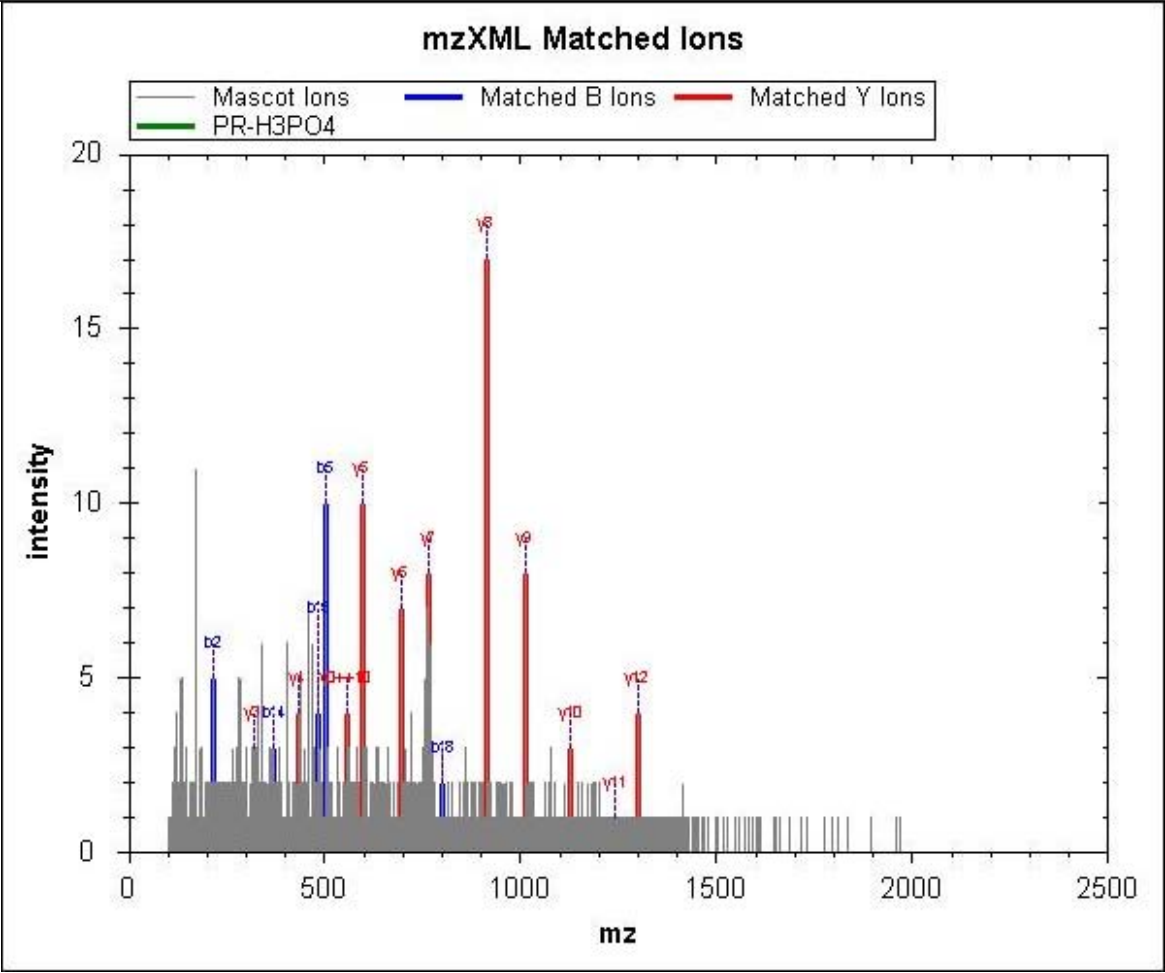

Protein index=1355, ACC No:IPI00045946

Peptide index=5533 MS/MS spectrum

Sequence: NLAEALLTYETLDAK, m/z:832.9399, charge:+ 2, Modification: , Mod Position:

Score: 70.75, Raw data:WET\_B3\_090616\_03.mzxml, MS/MS Elution time: 74.57533, Scan number:4121, Mass delta:-0.0019, Rank:1

| No | b      | b++    | b*     | b*++   | b0     | b0++   | Seq | y       | y++    | y*      | y*++   | y0      | y0++   | RevNo |
|----|--------|--------|--------|--------|--------|--------|-----|---------|--------|---------|--------|---------|--------|-------|
| 1  | 115.05 | 58.03  | 98.02  | 49.52  |        |        | N   |         |        |         |        |         |        | 15    |
| 2  | 228.13 | 114.57 | 211.11 | 106.06 |        |        | L   | 1550.83 | 775.92 | 1533.8  | 767.41 | 1532.82 | 766.91 | 14    |
| 3  | 299.17 | 150.09 | 282.14 | 141.58 |        |        | A   | 1437.75 | 719.38 | 1420.72 | 710.86 | 1419.74 | 710.37 | 13    |
| 4  | 428.21 | 214.61 | 411.19 | 206.1  | 410.2  | 205.61 | E   | 1366.71 | 683.86 | 1349.68 | 675.35 | 1348.7  | 674.85 | 12    |
| 5  | 499.25 | 250.13 | 482.22 | 241.62 | 481.24 | 241.12 | A   | 1237.67 | 619.34 | 1220.64 | 610.82 | 1219.66 | 610.33 | 11    |
| 6  | 612.34 | 306.67 | 595.31 | 298.16 | 594.32 | 297.67 | L   | 1166.63 | 583.82 | 1149.6  | 575.31 | 1148.62 | 574.81 | 10    |

|    |         |        |         |        |         |        |   |         |        |         |        |         |        |   |
|----|---------|--------|---------|--------|---------|--------|---|---------|--------|---------|--------|---------|--------|---|
| 7  | 725.42  | 363.21 | 708.39  | 354.7  | 707.41  | 354.21 | L | 1053.55 | 527.28 | 1036.52 | 518.76 | 1035.54 | 518.27 | 9 |
| 8  | 826.47  | 413.74 | 809.44  | 405.22 | 808.46  | 404.73 | T | 940.46  | 470.73 | 923.44  | 462.22 | 922.45  | 461.73 | 8 |
| 9  | 989.53  | 495.27 | 972.5   | 486.76 | 971.52  | 486.26 | Y | 839.41  | 420.21 | 822.39  | 411.7  | 821.4   | 411.21 | 7 |
| 10 | 1118.57 | 559.79 | 1101.55 | 551.28 | 1100.56 | 550.78 | E | 676.35  | 338.68 | 659.32  | 330.17 | 658.34  | 329.67 | 6 |
| 11 | 1219.62 | 610.31 | 1202.59 | 601.8  | 1201.61 | 601.31 | T | 547.31  | 274.16 | 530.28  | 265.64 | 529.3   | 265.15 | 5 |
| 12 | 1332.7  | 666.86 | 1315.68 | 658.34 | 1314.69 | 657.85 | L | 446.26  | 223.63 | 429.23  | 215.12 | 428.25  | 214.63 | 4 |
| 13 | 1447.73 | 724.37 | 1430.71 | 715.86 | 1429.72 | 715.36 | D | 333.18  | 167.09 | 316.15  | 158.58 | 315.17  | 158.09 | 3 |
| 14 | 1518.77 | 759.89 | 1501.74 | 751.37 | 1500.76 | 750.88 | A | 218.15  | 109.58 | 201.12  | 101.07 |         |        | 2 |
| 15 |         |        |         |        |         |        | K | 147.11  | 74.06  | 130.09  | 65.55  |         |        | 1 |

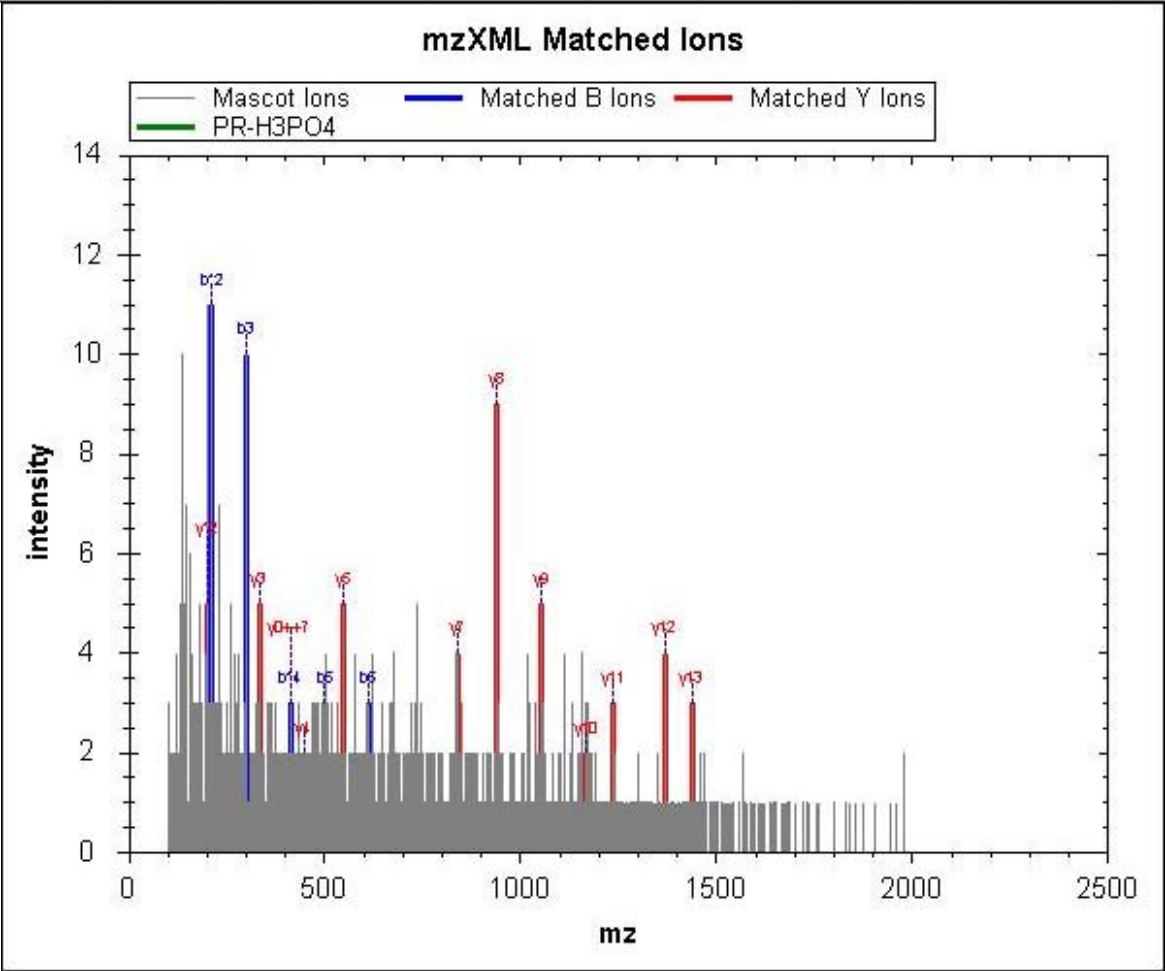

Protein index=1356, ACC No:IPI00299033

Peptide index=5105 MS/MS spectrum

Sequence: DSQVVQVVL DGLK, m/z:700.3907, charge:+ 2, Modification: , Mod Position:

Score: 59.83, Raw data:WET\_B3\_090616\_03.mzxml, MS/MS Elution time: 69.35083, Scan number:3815, Mass delta:-0.002, Rank:1

| No | b      | b++    | b*    | b*++   | b0     | b0++   | Seq | y       | y++    | y*      | y*++   | y0      | y0++   | RevNo |
|----|--------|--------|-------|--------|--------|--------|-----|---------|--------|---------|--------|---------|--------|-------|
| 1  | 116.03 | 58.52  |       |        | 98.02  | 49.52  | D   |         |        |         |        |         |        | 13    |
| 2  | 203.07 | 102.04 |       |        | 185.06 | 93.03  | S   | 1284.75 | 642.88 | 1267.73 | 634.37 | 1266.74 | 633.87 | 12    |
| 3  | 331.12 | 166.07 | 314.1 | 157.55 | 313.11 | 157.06 | Q   | 1197.72 | 599.36 | 1180.69 | 590.85 | 1179.71 | 590.36 | 11    |

|    |         |        |         |        |         |        |   |         |        |         |        |         |        |    |
|----|---------|--------|---------|--------|---------|--------|---|---------|--------|---------|--------|---------|--------|----|
| 4  | 430.19  | 215.6  | 413.17  | 207.09 | 412.18  | 206.59 | V | 1069.66 | 535.33 | 1052.64 | 526.82 | 1051.65 | 526.33 | 10 |
| 5  | 529.26  | 265.13 | 512.24  | 256.62 | 511.25  | 256.13 | V | 970.59  | 485.8  | 953.57  | 477.29 | 952.58  | 476.79 | 9  |
| 6  | 657.32  | 329.16 | 640.29  | 320.65 | 639.31  | 320.16 | Q | 871.52  | 436.27 | 854.5   | 427.75 | 853.51  | 427.26 | 8  |
| 7  | 756.39  | 378.7  | 739.36  | 370.18 | 738.38  | 369.69 | V | 743.47  | 372.24 | 726.44  | 363.72 | 725.46  | 363.23 | 7  |
| 8  | 855.46  | 428.23 | 838.43  | 419.72 | 837.45  | 419.23 | V | 644.4   | 322.7  | 627.37  | 314.19 | 626.39  | 313.7  | 6  |
| 9  | 968.54  | 484.77 | 951.51  | 476.26 | 950.53  | 475.77 | L | 545.33  | 273.17 | 528.3   | 264.65 | 527.32  | 264.16 | 5  |
| 10 | 1083.57 | 542.29 | 1066.54 | 533.77 | 1065.56 | 533.28 | D | 432.25  | 216.63 | 415.22  | 208.11 | 414.23  | 207.62 | 4  |
| 11 | 1140.59 | 570.8  | 1123.56 | 562.29 | 1122.58 | 561.79 | G | 317.22  | 159.11 | 300.19  | 150.6  |         |        | 3  |
| 12 | 1253.67 | 627.34 | 1236.65 | 618.83 | 1235.66 | 618.34 | L | 260.2   | 130.6  | 243.17  | 122.09 |         |        | 2  |
| 13 |         |        |         |        |         |        | K | 147.11  | 74.06  | 130.09  | 65.55  |         |        | 1  |

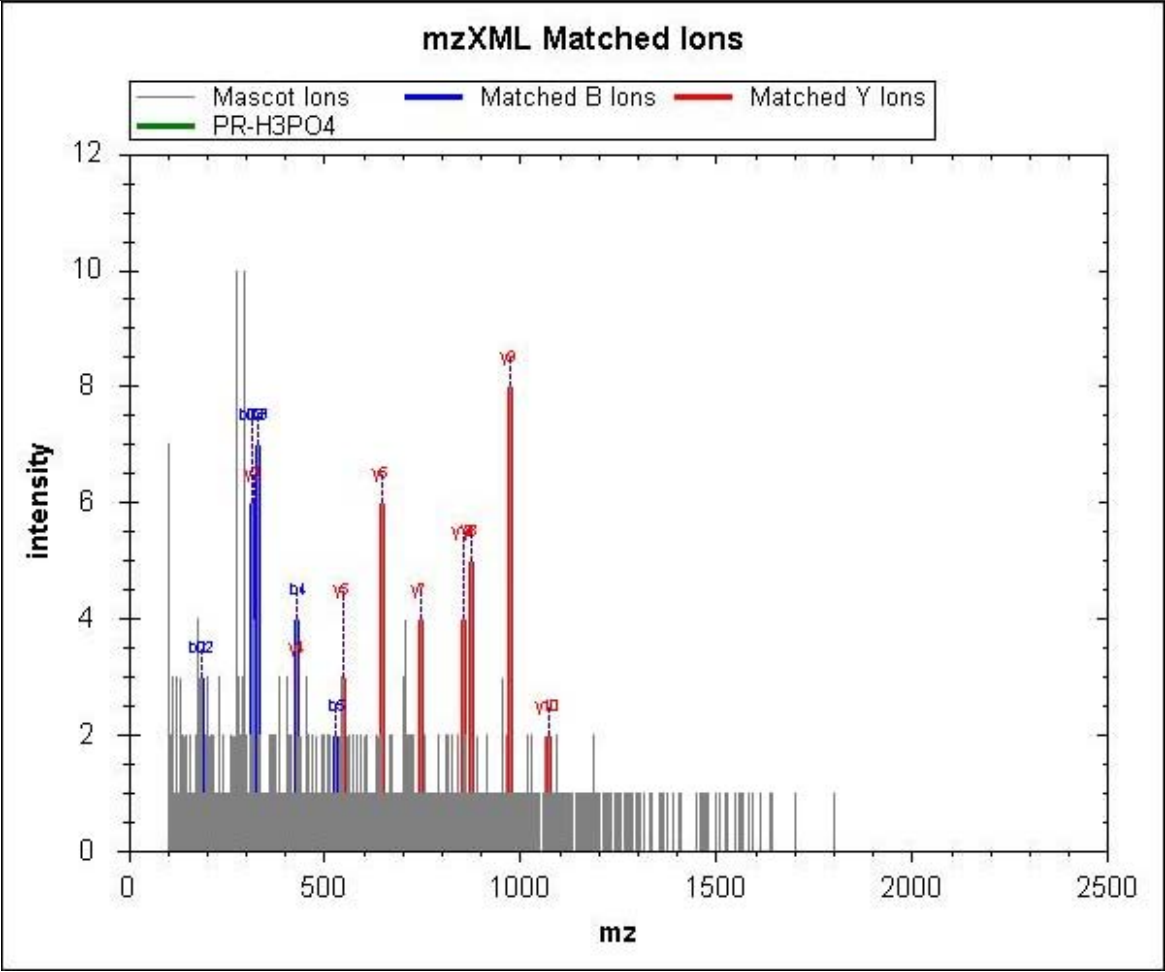

Protein index=1357, ACC No: IPI00006615

Peptide index=2364 MS/MS spectrum

Sequence: IAENLGDVQISDK, m/z: 701.3585, charge: + 2, Modification: , Mod Position:

Score: 45.73, Raw data: WET\_B3\_090616\_01.mzxml, MS/MS Elution time: 43.5215, Scan number: 2294, Mass delta: -0.0123, Rank: 1

| No | b      | b++   | b* | b*++ | b0 | b0++ | Seq | y       | y++    | y*      | y*++   | y0      | y0++   | RevNo |
|----|--------|-------|----|------|----|------|-----|---------|--------|---------|--------|---------|--------|-------|
| 1  | 114.09 | 57.55 |    |      |    |      | I   |         |        |         |        |         |        | 13    |
| 2  | 185.13 | 93.07 |    |      |    |      | A   | 1288.64 | 644.82 | 1271.61 | 636.31 | 1270.63 | 635.82 | 12    |

|    |         |        |         |        |         |        |   |         |        |         |        |         |        |    |
|----|---------|--------|---------|--------|---------|--------|---|---------|--------|---------|--------|---------|--------|----|
| 3  | 314.17  | 157.59 |         |        | 296.16  | 148.58 | E | 1217.6  | 609.3  | 1200.57 | 600.79 | 1199.59 | 600.3  | 11 |
| 4  | 428.21  | 214.61 | 411.19  | 206.1  | 410.2   | 205.61 | N | 1088.56 | 544.78 | 1071.53 | 536.27 | 1070.55 | 535.78 | 10 |
| 5  | 541.3   | 271.15 | 524.27  | 262.64 | 523.29  | 262.15 | L | 974.52  | 487.76 | 957.49  | 479.25 | 956.5   | 478.76 | 9  |
| 6  | 598.32  | 299.66 | 581.29  | 291.15 | 580.31  | 290.66 | G | 861.43  | 431.22 | 844.4   | 422.71 | 843.42  | 422.21 | 8  |
| 7  | 713.35  | 357.18 | 696.32  | 348.66 | 695.34  | 348.17 | D | 804.41  | 402.71 | 787.38  | 394.2  | 786.4   | 393.7  | 7  |
| 8  | 812.41  | 406.71 | 795.39  | 398.2  | 794.4   | 397.71 | V | 689.38  | 345.2  | 672.36  | 336.68 | 671.37  | 336.19 | 6  |
| 9  | 940.47  | 470.74 | 923.45  | 462.23 | 922.46  | 461.74 | Q | 590.31  | 295.66 | 573.29  | 287.15 | 572.3   | 286.66 | 5  |
| 10 | 1053.56 | 527.28 | 1036.53 | 518.77 | 1035.55 | 518.28 | I | 462.26  | 231.63 | 445.23  | 223.12 | 444.25  | 222.63 | 4  |
| 11 | 1140.59 | 570.8  | 1123.56 | 562.29 | 1122.58 | 561.79 | S | 349.17  | 175.09 | 332.15  | 166.58 | 331.16  | 166.08 | 3  |
| 12 | 1255.62 | 628.31 | 1238.59 | 619.8  | 1237.61 | 619.31 | D | 262.14  | 131.57 | 245.11  | 123.06 | 244.13  | 122.57 | 2  |
| 13 |         |        |         |        |         |        | K | 147.11  | 74.06  | 130.09  | 65.55  |         |        | 1  |

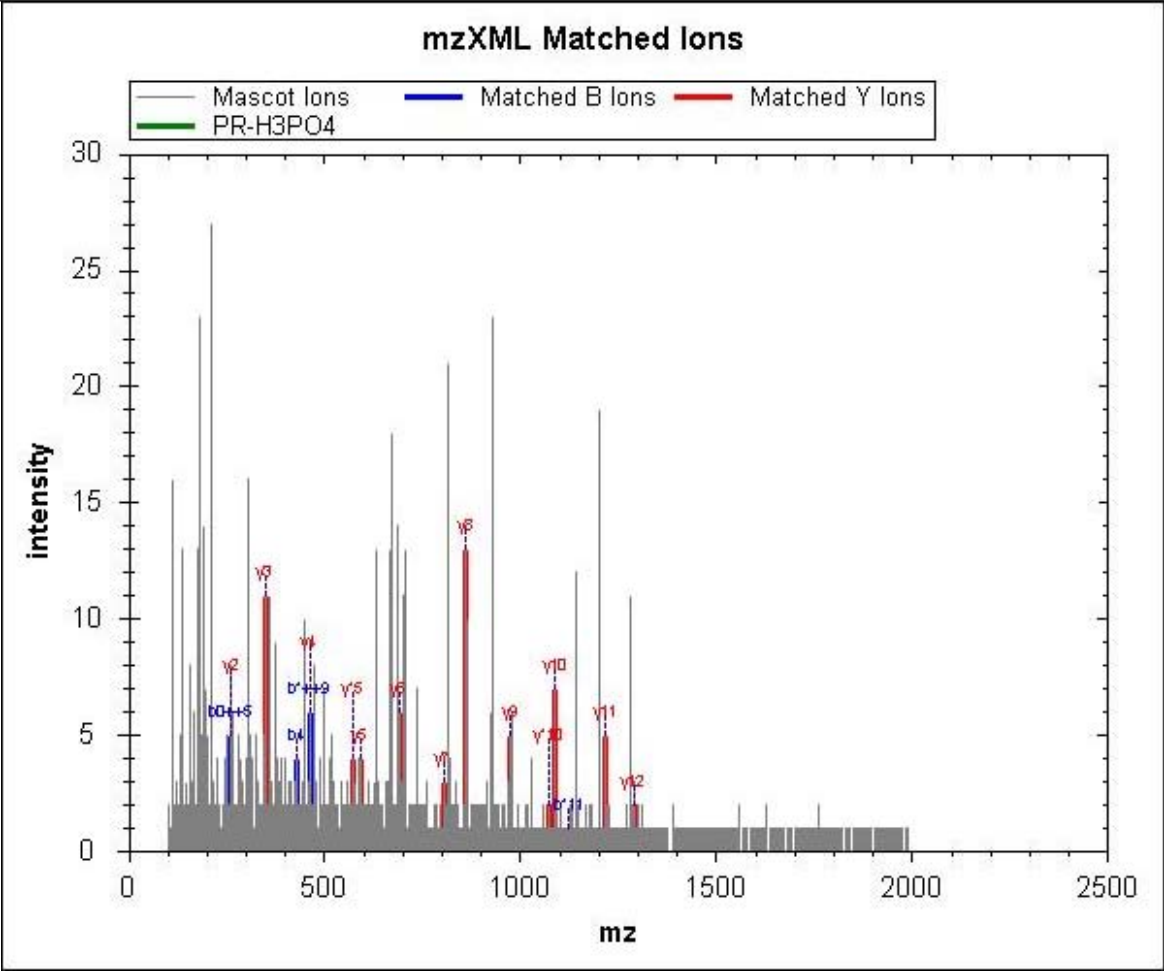

Protein index=1358, ACC No: IPI00289159

Peptide index=6928 MS/MS spectrum

Sequence: SVINLLFAAYTGDVSA LR, m/z:955.5244, charge: + 2, Modification: , Mod Position:

Score: 70.71, Raw data: WET\_B3\_090616\_02.mzxml, MS/MS Elution time: 100.4345, Scan number: 5640, Mass delta: 0.0033, Rank: 1

| No | b     | b++   | b* | b*++ | b0    | b0++  | Seq | y | y++ | y* | y*++ | y0 | y0++ | RevNo |
|----|-------|-------|----|------|-------|-------|-----|---|-----|----|------|----|------|-------|
| 1  | 88.04 | 44.52 |    |      | 70.03 | 35.52 | S   |   |     |    |      |    |      | 18    |

|    |         |        |         |        |         |        |   |         |        |         |        |         |        |    |
|----|---------|--------|---------|--------|---------|--------|---|---------|--------|---------|--------|---------|--------|----|
| 2  | 187.11  | 94.06  |         |        | 169.1   | 85.05  | V | 1823.01 | 912.01 | 1805.98 | 903.49 | 1805    | 903    | 17 |
| 3  | 300.19  | 150.6  |         |        | 282.18  | 141.59 | I | 1723.94 | 862.47 | 1706.91 | 853.96 | 1705.93 | 853.47 | 16 |
| 4  | 414.23  | 207.62 | 397.21  | 199.11 | 396.22  | 198.62 | N | 1610.85 | 805.93 | 1593.83 | 797.42 | 1592.84 | 796.93 | 15 |
| 5  | 527.32  | 264.16 | 510.29  | 255.65 | 509.31  | 255.16 | L | 1496.81 | 748.91 | 1479.78 | 740.4  | 1478.8  | 739.9  | 14 |
| 6  | 640.4   | 320.71 | 623.38  | 312.19 | 622.39  | 311.7  | L | 1383.73 | 692.37 | 1366.7  | 683.85 | 1365.72 | 683.36 | 13 |
| 7  | 787.47  | 394.24 | 770.44  | 385.73 | 769.46  | 385.23 | F | 1270.64 | 635.82 | 1253.62 | 627.31 | 1252.63 | 626.82 | 12 |
| 8  | 858.51  | 429.76 | 841.48  | 421.24 | 840.5   | 420.75 | A | 1123.57 | 562.29 | 1106.55 | 553.78 | 1105.56 | 553.29 | 11 |
| 9  | 929.55  | 465.28 | 912.52  | 456.76 | 911.53  | 456.27 | A | 1052.54 | 526.77 | 1035.51 | 518.26 | 1034.53 | 517.77 | 10 |
| 10 | 1092.61 | 546.81 | 1075.58 | 538.29 | 1074.6  | 537.8  | Y | 981.5   | 491.25 | 964.47  | 482.74 | 963.49  | 482.25 | 9  |
| 11 | 1193.66 | 597.33 | 1176.63 | 588.82 | 1175.65 | 588.33 | T | 818.44  | 409.72 | 801.41  | 401.21 | 800.43  | 400.72 | 8  |
| 12 | 1250.68 | 625.84 | 1233.65 | 617.33 | 1232.67 | 616.84 | G | 717.39  | 359.2  | 700.36  | 350.68 | 699.38  | 350.19 | 7  |
| 13 | 1365.71 | 683.36 | 1348.68 | 674.84 | 1347.69 | 674.35 | D | 660.37  | 330.69 | 643.34  | 322.17 | 642.36  | 321.68 | 6  |
| 14 | 1464.77 | 732.89 | 1447.75 | 724.38 | 1446.76 | 723.89 | V | 545.34  | 273.17 | 528.31  | 264.66 | 527.33  | 264.17 | 5  |
| 15 | 1551.81 | 776.41 | 1534.78 | 767.89 | 1533.79 | 767.4  | S | 446.27  | 223.64 | 429.25  | 215.13 | 428.26  | 214.63 | 4  |
| 16 | 1622.84 | 811.92 | 1605.82 | 803.41 | 1604.83 | 802.92 | A | 359.24  | 180.12 | 342.21  | 171.61 |         |        | 3  |
| 17 | 1735.93 | 868.47 | 1718.9  | 859.95 | 1717.92 | 859.46 | L | 288.2   | 144.61 | 271.18  | 136.09 |         |        | 2  |
| 18 |         |        |         |        |         |        | R | 175.12  | 88.06  | 158.09  | 79.55  |         |        | 1  |

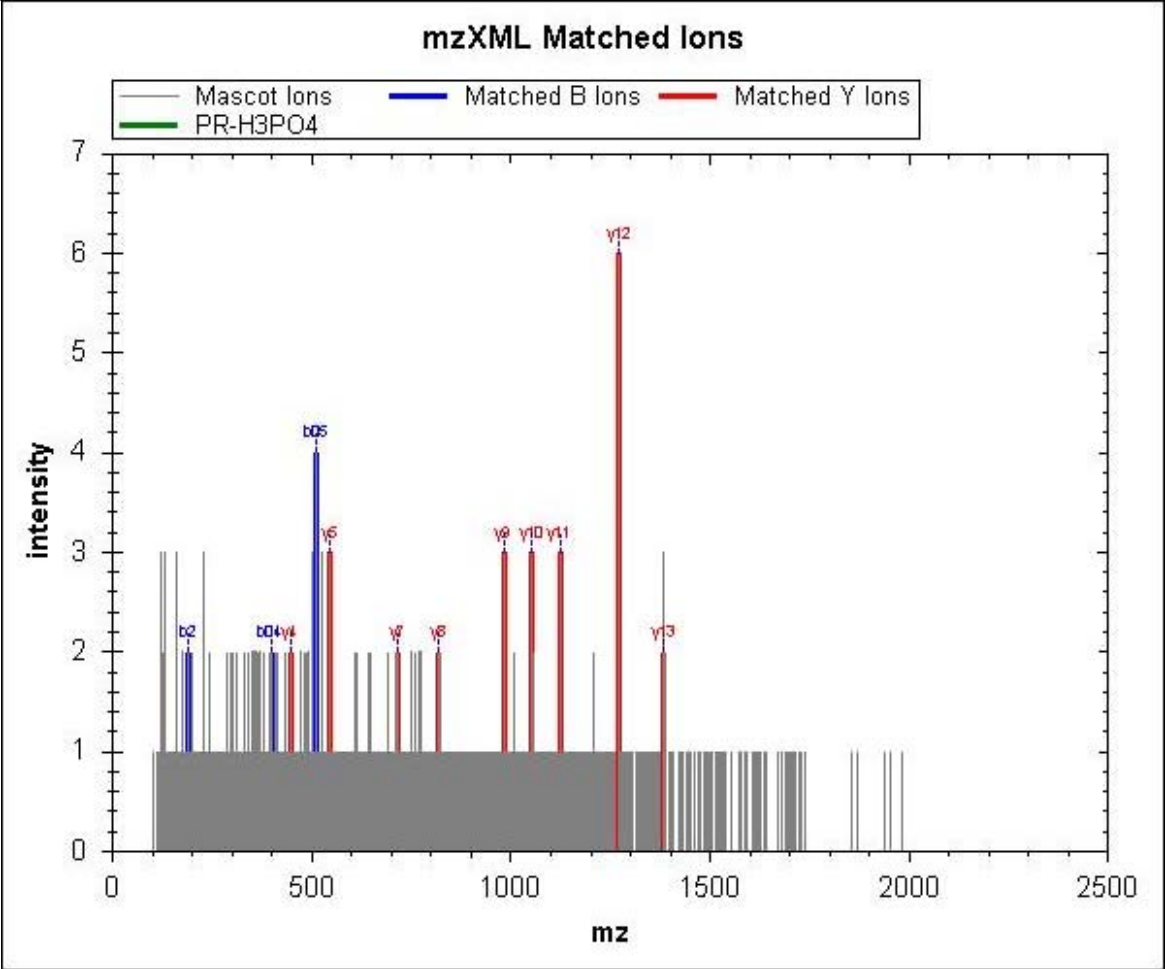

Protein index=1359, ACC No:IP100007084

Peptide index=6218 MS/MS spectrum

Sequence: FGLGSVAGAVGATAVYPIDLVK, m/z:1053.084, charge:+ 2, Modification: , Mod Position:  
Score: 62.94, Raw data:WET\_B3\_090616\_02.mzxml, MS/MS Elution time: 84.35217, Scan number:4698,  
Mass delta:-0.0036, Rank:1

| No | b       | b++    | b0      | b0++   | Seq | y       | y++    | y*      | y*++   | y0      | y0++   | RevNo |
|----|---------|--------|---------|--------|-----|---------|--------|---------|--------|---------|--------|-------|
| 1  | 148.08  | 74.54  |         |        | F   |         |        |         |        |         |        | 22    |
| 2  | 205.1   | 103.05 |         |        | G   | 1958.1  | 979.55 | 1941.07 | 971.04 | 1940.09 | 970.55 | 21    |
| 3  | 318.18  | 159.59 |         |        | L   | 1901.07 | 951.04 | 1884.05 | 942.53 | 1883.06 | 942.04 | 20    |
| 4  | 375.2   | 188.1  |         |        | G   | 1787.99 | 894.5  | 1770.96 | 885.99 | 1769.98 | 885.49 | 19    |
| 5  | 462.23  | 231.62 | 444.22  | 222.62 | S   | 1730.97 | 865.99 | 1713.94 | 857.47 | 1712.96 | 856.98 | 18    |
| 6  | 561.3   | 281.16 | 543.29  | 272.15 | V   | 1643.94 | 822.47 | 1626.91 | 813.96 | 1625.93 | 813.47 | 17    |
| 7  | 632.34  | 316.67 | 614.33  | 307.67 | A   | 1544.87 | 772.94 | 1527.84 | 764.42 | 1526.86 | 763.93 | 16    |
| 8  | 689.36  | 345.18 | 671.35  | 336.18 | G   | 1473.83 | 737.42 | 1456.8  | 728.91 | 1455.82 | 728.41 | 15    |
| 9  | 760.4   | 380.7  | 742.39  | 371.7  | A   | 1416.81 | 708.91 | 1399.78 | 700.4  | 1398.8  | 699.9  | 14    |
| 10 | 859.47  | 430.24 | 841.46  | 421.23 | V   | 1345.77 | 673.39 | 1328.75 | 664.88 | 1327.76 | 664.38 | 13    |
| 11 | 916.49  | 458.75 | 898.48  | 449.74 | G   | 1246.7  | 623.86 | 1229.68 | 615.34 | 1228.69 | 614.85 | 12    |
| 12 | 987.53  | 494.27 | 969.52  | 485.26 | A   | 1189.68 | 595.35 | 1172.66 | 586.83 | 1171.67 | 586.34 | 11    |
| 13 | 1088.57 | 544.79 | 1070.56 | 535.79 | T   | 1118.65 | 559.83 | 1101.62 | 551.31 | 1100.64 | 550.82 | 10    |
| 14 | 1159.61 | 580.31 | 1141.6  | 571.3  | A   | 1017.6  | 509.3  | 1000.57 | 500.79 | 999.59  | 500.3  | 9     |
| 15 | 1258.68 | 629.84 | 1240.67 | 620.84 | V   | 946.56  | 473.78 | 929.53  | 465.27 | 928.55  | 464.78 | 8     |
| 16 | 1421.74 | 711.37 | 1403.73 | 702.37 | Y   | 847.49  | 424.25 | 830.47  | 415.74 | 829.48  | 415.24 | 7     |
| 17 | 1518.8  | 759.9  | 1500.78 | 750.9  | P   | 684.43  | 342.72 | 667.4   | 334.2  | 666.42  | 333.71 | 6     |
| 18 | 1631.88 | 816.44 | 1613.87 | 807.44 | I   | 587.38  | 294.19 | 570.35  | 285.68 | 569.37  | 285.19 | 5     |
| 19 | 1746.91 | 873.96 | 1728.9  | 864.95 | D   | 474.29  | 237.65 | 457.27  | 229.14 | 456.28  | 228.64 | 4     |
| 20 | 1859.99 | 930.5  | 1841.98 | 921.49 | L   | 359.27  | 180.14 | 342.24  | 171.62 |         |        | 3     |
| 21 | 1959.06 | 980.03 | 1941.05 | 971.03 | V   | 246.18  | 123.59 | 229.15  | 115.08 |         |        | 2     |
| 22 |         |        |         |        | K   | 147.11  | 74.06  | 130.09  | 65.55  |         |        | 1     |

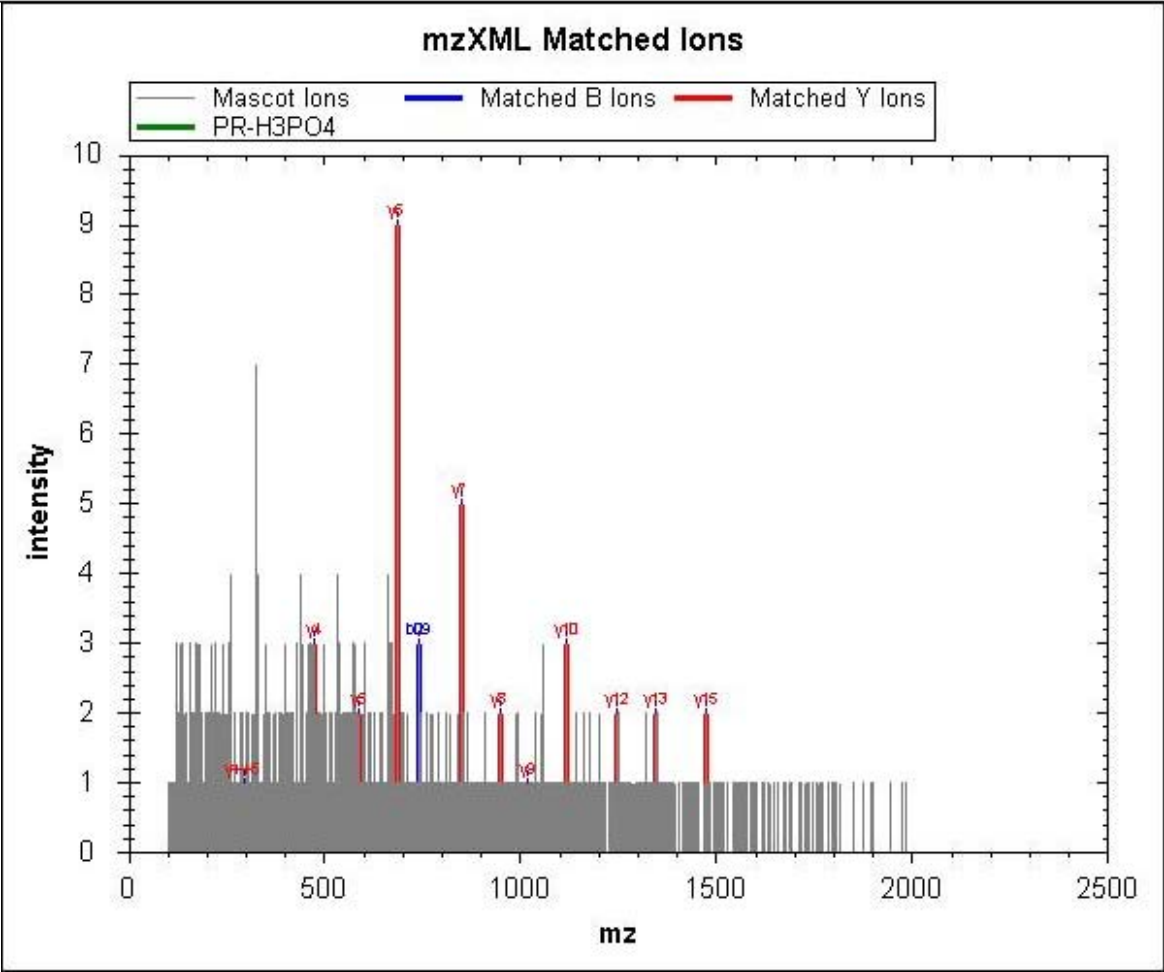

Protein index=1360, ACC No: IPI00020128

Peptide index=615 MS/MS spectrum

Sequence: KDEIENSIVHR, m/z:447.2301, charge:+ 3, Modification: , Mod Position:

Score: 33.59, Raw data:WET\_B3\_090616\_02.mzxml, MS/MS Elution time: 21.47583, Scan number:1016, Mass delta:-0.0206, Rank:1

| No | b       | b++    | b*      | b*++   | b0      | b0++   | Seq | y       | y++    | y*      | y*++   | y0      | y0++   | RevNo |
|----|---------|--------|---------|--------|---------|--------|-----|---------|--------|---------|--------|---------|--------|-------|
| 1  | 129.1   | 65.05  | 112.08  | 56.54  |         |        | K   |         |        |         |        |         |        | 11    |
| 2  | 244.13  | 122.57 | 227.1   | 114.05 | 226.12  | 113.56 | D   | 1211.6  | 606.3  | 1194.57 | 597.79 | 1193.59 | 597.3  | 10    |
| 3  | 373.17  | 187.09 | 356.15  | 178.58 | 355.16  | 178.08 | E   | 1096.57 | 548.79 | 1079.55 | 540.28 | 1078.56 | 539.79 | 9     |
| 4  | 486.26  | 243.63 | 469.23  | 235.12 | 468.25  | 234.63 | I   | 967.53  | 484.27 | 950.51  | 475.76 | 949.52  | 475.26 | 8     |
| 5  | 615.3   | 308.15 | 598.27  | 299.64 | 597.29  | 299.15 | E   | 854.45  | 427.73 | 837.42  | 419.21 | 836.44  | 418.72 | 7     |
| 6  | 729.34  | 365.17 | 712.31  | 356.66 | 711.33  | 356.17 | N   | 725.41  | 363.21 | 708.38  | 354.69 | 707.39  | 354.2  | 6     |
| 7  | 816.37  | 408.69 | 799.35  | 400.18 | 798.36  | 399.69 | S   | 611.36  | 306.18 | 594.34  | 297.67 | 593.35  | 297.18 | 5     |
| 8  | 929.46  | 465.23 | 912.43  | 456.72 | 911.45  | 456.23 | I   | 524.33  | 262.67 | 507.3   | 254.16 |         |        | 4     |
| 9  | 1028.53 | 514.77 | 1011.5  | 506.25 | 1010.52 | 505.76 | V   | 411.25  | 206.13 | 394.22  | 197.61 |         |        | 3     |
| 10 | 1165.58 | 583.3  | 1148.56 | 574.78 | 1147.57 | 574.29 | H   | 312.18  | 156.59 | 295.15  | 148.08 |         |        | 2     |
| 11 |         |        |         |        |         |        | R   | 175.12  | 88.06  | 158.09  | 79.55  |         |        | 1     |

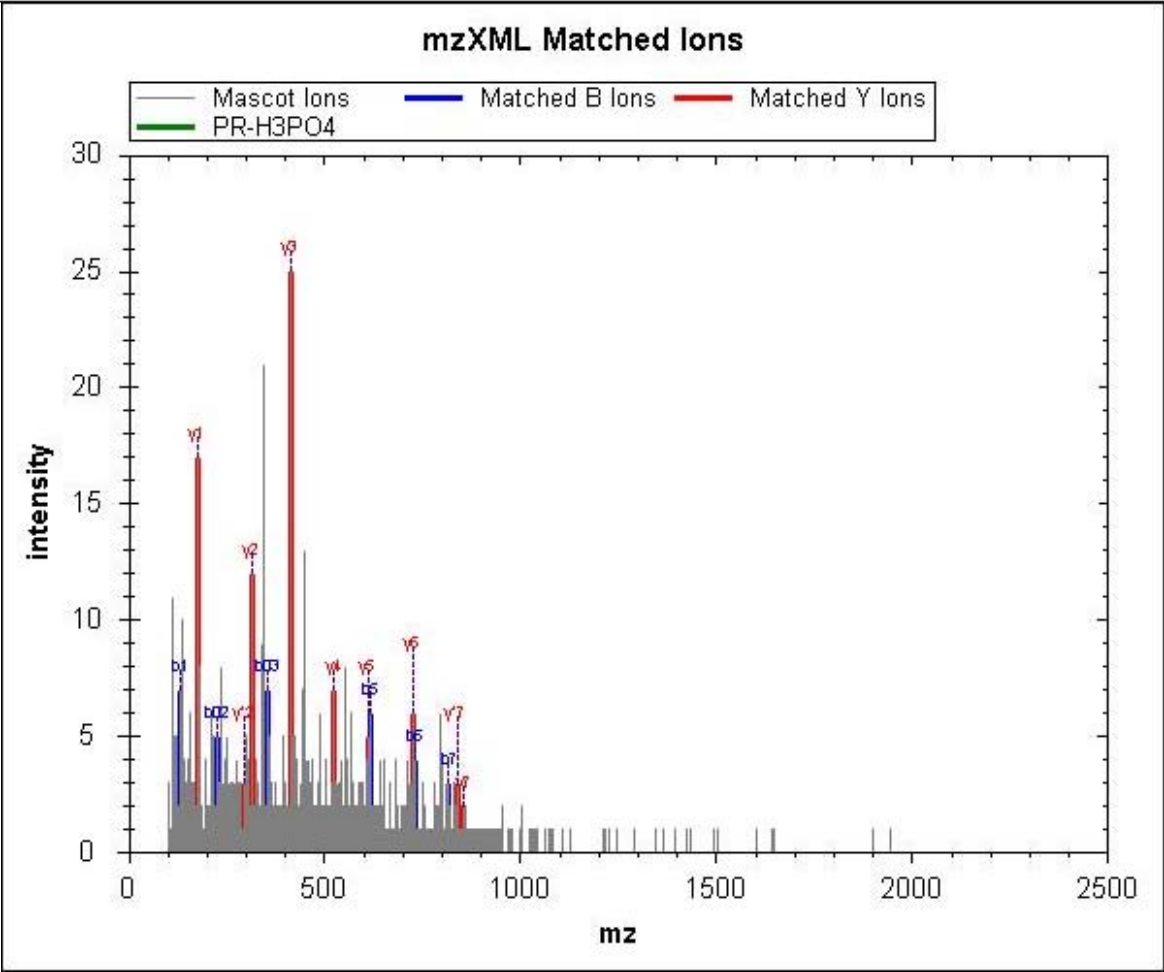

Protein index=1361, ACC No:IPI00159072

Peptide index=7198 MS/MS spectrum

Sequence: IIIENLFYPVTLEVLHQIFSK, m/z:839.4795, charge:+ 3, Modification: , Mod Position:

Score: 32.7, Raw data:WET\_B3\_090616\_02.mzxml, MS/MS Elution time: 112.0035, Scan number:6343, Mass delta:0.0076, Rank:1

| No | b       | b++    | b*      | b*++   | b0      | b0++   | Seq | y       | y++     | y*      | y*++    | y0      | y0++    | RevNo |
|----|---------|--------|---------|--------|---------|--------|-----|---------|---------|---------|---------|---------|---------|-------|
| 1  | 114.09  | 57.55  |         |        |         |        | I   |         |         |         |         |         |         | 21    |
| 2  | 227.18  | 114.09 |         |        |         |        | I   | 2403.33 | 1202.17 | 2386.31 | 1193.66 | 2385.32 | 1193.16 | 20    |
| 3  | 340.26  | 170.63 |         |        |         |        | I   | 2290.25 | 1145.63 | 2273.22 | 1137.11 | 2272.24 | 1136.62 | 19    |
| 4  | 469.3   | 235.15 |         |        | 451.29  | 226.15 | E   | 2177.16 | 1089.09 | 2160.14 | 1080.57 | 2159.15 | 1080.08 | 18    |
| 5  | 583.34  | 292.18 | 566.32  | 283.66 | 565.33  | 283.17 | N   | 2048.12 | 1024.56 | 2031.1  | 1016.05 | 2030.11 | 1015.56 | 17    |
| 6  | 696.43  | 348.72 | 679.4   | 340.2  | 678.42  | 339.71 | L   | 1934.08 | 967.54  | 1917.05 | 959.03  | 1916.07 | 958.54  | 16    |
| 7  | 843.5   | 422.25 | 826.47  | 413.74 | 825.49  | 413.25 | F   | 1820.99 | 911     | 1803.97 | 902.49  | 1802.98 | 902     | 15    |
| 8  | 1006.56 | 503.78 | 989.53  | 495.27 | 988.55  | 494.78 | Y   | 1673.93 | 837.47  | 1656.9  | 828.95  | 1655.92 | 828.46  | 14    |
| 9  | 1103.61 | 552.31 | 1086.59 | 543.8  | 1085.6  | 543.31 | P   | 1510.86 | 755.94  | 1493.84 | 747.42  | 1492.85 | 746.93  | 13    |
| 10 | 1202.68 | 601.84 | 1185.66 | 593.33 | 1184.67 | 592.84 | V   | 1413.81 | 707.41  | 1396.78 | 698.9   | 1395.8  | 698.4   | 12    |
| 11 | 1303.73 | 652.37 | 1286.7  | 643.86 | 1285.72 | 643.36 | T   | 1314.74 | 657.87  | 1297.72 | 649.36  | 1296.73 | 648.87  | 11    |
| 12 | 1416.81 | 708.91 | 1399.79 | 700.4  | 1398.8  | 699.91 | L   | 1213.69 | 607.35  | 1196.67 | 598.84  | 1195.68 | 598.35  | 10    |

|    |         |         |         |         |         |         |   |         |        |         |        |        |        |   |
|----|---------|---------|---------|---------|---------|---------|---|---------|--------|---------|--------|--------|--------|---|
| 13 | 1545.86 | 773.43  | 1528.83 | 764.92  | 1527.85 | 764.43  | E | 1100.61 | 550.81 | 1083.58 | 542.3  | 1082.6 | 541.8  | 9 |
| 14 | 1644.92 | 822.97  | 1627.9  | 814.45  | 1626.91 | 813.96  | V | 971.57  | 486.29 | 954.54  | 477.77 | 953.56 | 477.28 | 8 |
| 15 | 1758.01 | 879.51  | 1740.98 | 870.99  | 1740    | 870.5   | L | 872.5   | 436.75 | 855.47  | 428.24 | 854.49 | 427.75 | 7 |
| 16 | 1895.07 | 948.04  | 1878.04 | 939.52  | 1877.06 | 939.03  | H | 759.41  | 380.21 | 742.39  | 371.7  | 741.4  | 371.21 | 6 |
| 17 | 2023.13 | 1012.07 | 2006.1  | 1003.55 | 2005.12 | 1003.06 | Q | 622.36  | 311.68 | 605.33  | 303.17 | 604.35 | 302.68 | 5 |
| 18 | 2136.21 | 1068.61 | 2119.18 | 1060.1  | 2118.2  | 1059.6  | I | 494.3   | 247.65 | 477.27  | 239.14 | 476.29 | 238.65 | 4 |
| 19 | 2283.28 | 1142.14 | 2266.25 | 1133.63 | 2265.27 | 1133.14 | F | 381.21  | 191.11 | 364.19  | 182.6  | 363.2  | 182.1  | 3 |
| 20 | 2370.31 | 1185.66 | 2353.28 | 1177.15 | 2352.3  | 1176.65 | S | 234.14  | 117.58 | 217.12  | 109.06 | 216.13 | 108.57 | 2 |
| 21 |         |         |         |         |         |         | K | 147.11  | 74.06  | 130.09  | 65.55  |        |        | 1 |

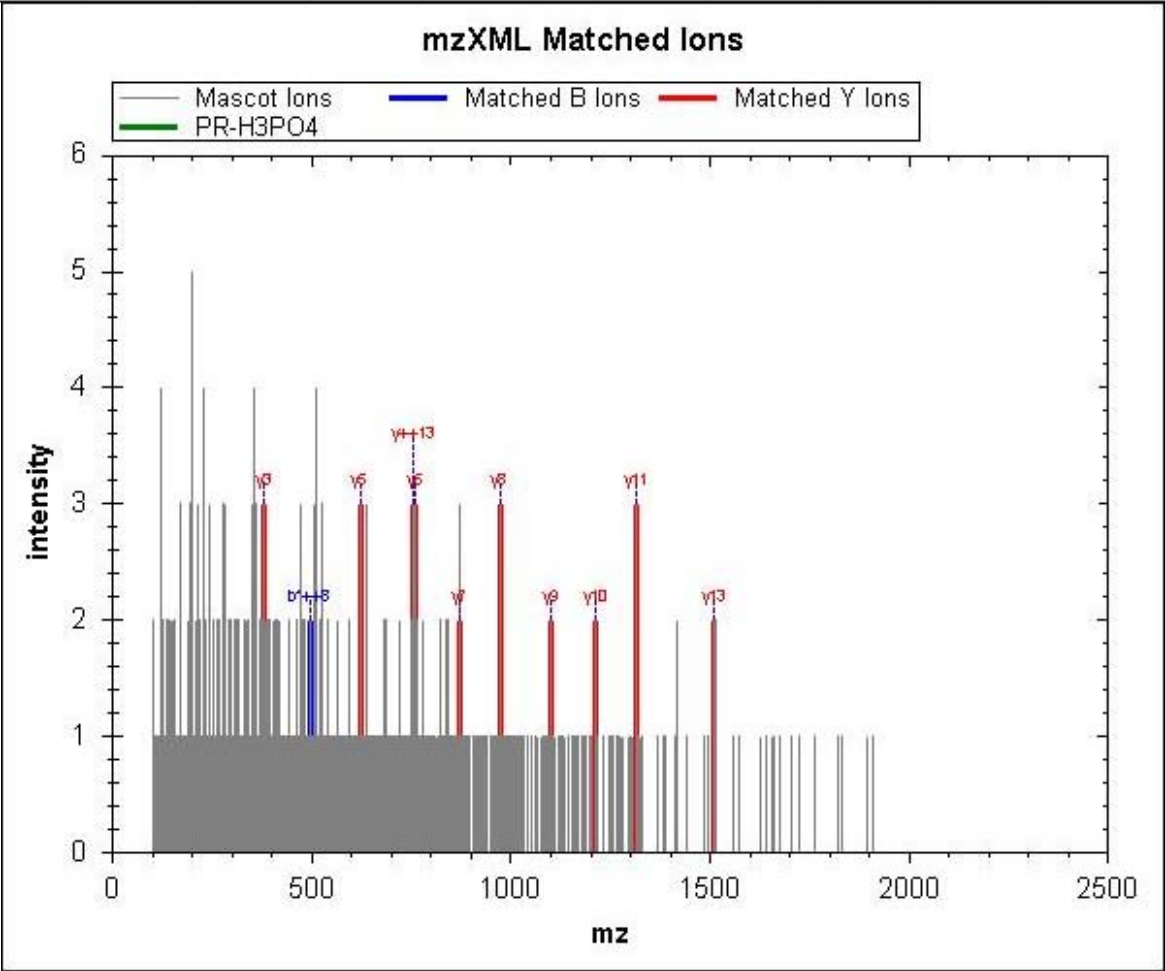

Protein index=1362, ACC No:IPI00033561

Peptide index=3076 MS/MS spectrum

Sequence: GYAYVEFENPDEAEK, m/z:880.8809, charge:+ 2, Modification: , Mod Position:

Score: 32.83, Raw data:WET\_B3\_090616\_02.mzxml, MS/MS Elution time: 49.72184, Scan number:2670, Mass delta:-0.0103, Rank:1

| No | b      | b++    | b* | b*++ | b0 | b0++ | Seq | y       | y++    | y*      | y*++   | y0      | y0++   | RevNo |
|----|--------|--------|----|------|----|------|-----|---------|--------|---------|--------|---------|--------|-------|
| 1  | 58.03  | 29.52  |    |      |    |      | G   |         |        |         |        |         |        | 15    |
| 2  | 221.09 | 111.05 |    |      |    |      | Y   | 1703.74 | 852.38 | 1686.72 | 843.86 | 1685.73 | 843.37 | 14    |
| 3  | 292.13 | 146.57 |    |      |    |      | A   | 1540.68 | 770.84 | 1523.65 | 762.33 | 1522.67 | 761.84 | 13    |

|    |         |        |         |        |         |        |   |         |        |         |        |         |        |    |
|----|---------|--------|---------|--------|---------|--------|---|---------|--------|---------|--------|---------|--------|----|
| 4  | 455.19  | 228.1  |         |        |         |        | Y | 1469.64 | 735.33 | 1452.62 | 726.81 | 1451.63 | 726.32 | 12 |
| 5  | 554.26  | 277.63 |         |        |         |        | V | 1306.58 | 653.79 | 1289.55 | 645.28 | 1288.57 | 644.79 | 11 |
| 6  | 683.3   | 342.16 |         |        | 665.29  | 333.15 | E | 1207.51 | 604.26 | 1190.48 | 595.75 | 1189.5  | 595.25 | 10 |
| 7  | 830.37  | 415.69 |         |        | 812.36  | 406.68 | F | 1078.47 | 539.74 | 1061.44 | 531.22 | 1060.46 | 530.73 | 9  |
| 8  | 959.41  | 480.21 |         |        | 941.4   | 471.21 | E | 931.4   | 466.2  | 914.37  | 457.69 | 913.39  | 457.2  | 8  |
| 9  | 1073.46 | 537.23 | 1056.43 | 528.72 | 1055.45 | 528.23 | N | 802.36  | 401.68 | 785.33  | 393.17 | 784.35  | 392.68 | 7  |
| 10 | 1170.51 | 585.76 | 1153.48 | 577.25 | 1152.5  | 576.75 | P | 688.31  | 344.66 | 671.29  | 336.15 | 670.3   | 335.66 | 6  |
| 11 | 1285.54 | 643.27 | 1268.51 | 634.76 | 1267.53 | 634.27 | D | 591.26  | 296.13 | 574.24  | 287.62 | 573.25  | 287.13 | 5  |
| 12 | 1414.58 | 707.79 | 1397.55 | 699.28 | 1396.57 | 698.79 | E | 476.24  | 238.62 | 459.21  | 230.11 | 458.22  | 229.62 | 4  |
| 13 | 1485.62 | 743.31 | 1468.59 | 734.8  | 1467.61 | 734.31 | A | 347.19  | 174.1  | 330.17  | 165.59 | 329.18  | 165.09 | 3  |
| 14 | 1614.66 | 807.83 | 1597.63 | 799.32 | 1596.65 | 798.83 | E | 276.16  | 138.58 | 259.13  | 130.07 | 258.14  | 129.58 | 2  |
| 15 |         |        |         |        |         |        | K | 147.11  | 74.06  | 130.09  | 65.55  |         |        | 1  |

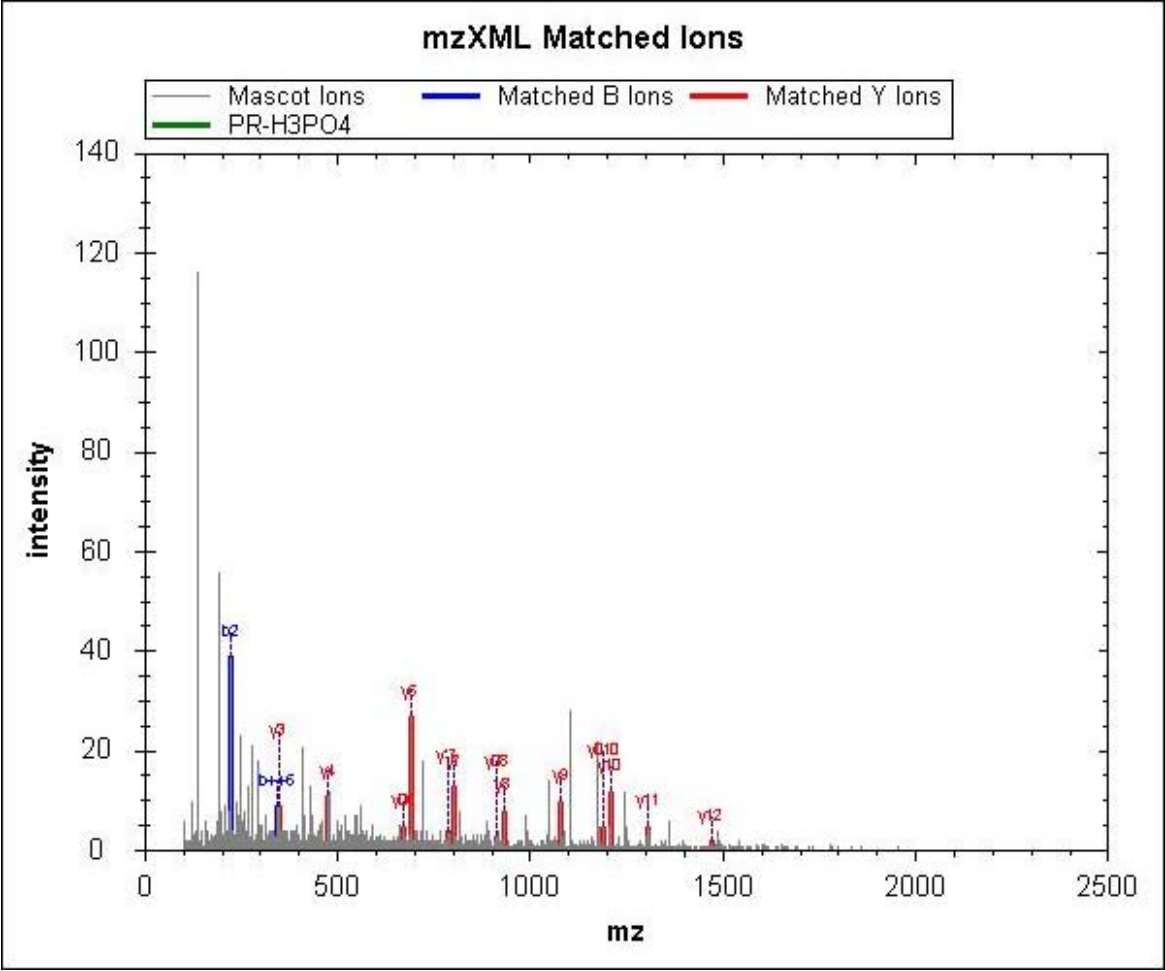

Protein index=1363, ACC No: IPI00012199

Peptide index=840 MS/MS spectrum

Sequence: KAEVVQVIR, m/z:521.3217, charge:+ 2, Modification: , Mod Position:

Score: 32.77, Raw data:WET\_B3\_090616\_03.mzxml, MS/MS Elution time: 25.94383, Scan number:1273, Mass delta:-0.0054, Rank:1

| No | b | b++ | b* | b*++ | b0 | b0++ | Seq | y | y++ | y* | y*++ | y0 | y0++ | RevNo |
|----|---|-----|----|------|----|------|-----|---|-----|----|------|----|------|-------|
|    |   |     |    |      |    |      |     |   |     |    |      |    |      |       |

|   |        |        |        |        |        |        |   |        |        |        |        |        |        |   |
|---|--------|--------|--------|--------|--------|--------|---|--------|--------|--------|--------|--------|--------|---|
| 1 | 129.1  | 65.05  | 112.08 | 56.54  |        |        | K |        |        |        |        |        |        | 9 |
| 2 | 200.14 | 100.57 | 183.11 | 92.06  |        |        | A | 913.55 | 457.28 | 896.52 | 448.76 | 895.54 | 448.27 | 8 |
| 3 | 329.18 | 165.09 | 312.16 | 156.58 | 311.17 | 156.09 | E | 842.51 | 421.76 | 825.48 | 413.25 | 824.5  | 412.75 | 7 |
| 4 | 428.25 | 214.63 | 411.22 | 206.12 | 410.24 | 205.62 | V | 713.47 | 357.24 | 696.44 | 348.72 |        |        | 6 |
| 5 | 527.32 | 264.16 | 510.29 | 255.65 | 509.31 | 255.16 | V | 614.4  | 307.7  | 597.37 | 299.19 |        |        | 5 |
| 6 | 655.38 | 328.19 | 638.35 | 319.68 | 637.37 | 319.19 | Q | 515.33 | 258.17 | 498.3  | 249.66 |        |        | 4 |
| 7 | 754.45 | 377.73 | 737.42 | 369.21 | 736.44 | 368.72 | V | 387.27 | 194.14 | 370.24 | 185.63 |        |        | 3 |
| 8 | 867.53 | 434.27 | 850.5  | 425.76 | 849.52 | 425.26 | I | 288.2  | 144.61 | 271.18 | 136.09 |        |        | 2 |
| 9 |        |        |        |        |        |        | R | 175.12 | 88.06  | 158.09 | 79.55  |        |        | 1 |

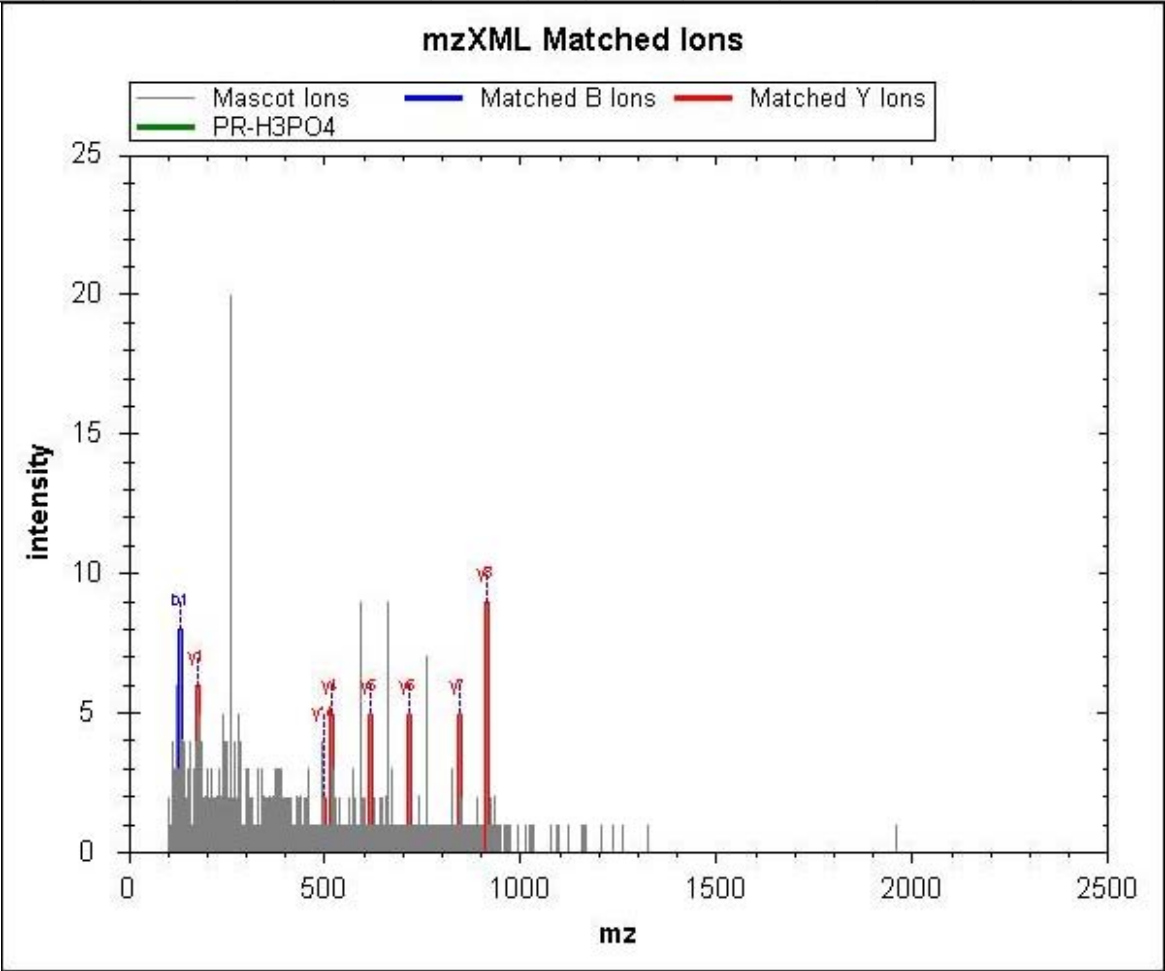

Protein index=1364, ACC No: IPI00026958

Peptide index=1764 MS/MS spectrum

Sequence: EAYHAVVLSYGAEDHR, m/z:606.2894, charge:+ 3, Modification: , Mod Position:

Score: 39.58, Raw data:WET\_B3\_090616\_03.mzxml, MS/MS Elution time: 37.35333, Scan number:1941, Mass delta:-0.0075, Rank:1

| No | b      | b++    | b0     | b0++   | Seq | y       | y++    | y*      | y*++   | y0      | y0++   | RevNo |
|----|--------|--------|--------|--------|-----|---------|--------|---------|--------|---------|--------|-------|
| 1  | 130.05 | 65.53  | 112.04 | 56.52  | E   |         |        |         |        |         |        | 16    |
| 2  | 201.09 | 101.05 | 183.08 | 92.04  | A   | 1687.82 | 844.41 | 1670.79 | 835.9  | 1669.81 | 835.41 | 15    |
| 3  | 364.15 | 182.58 | 346.14 | 173.57 | Y   | 1616.78 | 808.89 | 1599.76 | 800.38 | 1598.77 | 799.89 | 14    |

|    |         |        |         |        |   |         |        |         |        |         |        |    |
|----|---------|--------|---------|--------|---|---------|--------|---------|--------|---------|--------|----|
| 4  | 501.21  | 251.11 | 483.2   | 242.1  | H | 1453.72 | 727.36 | 1436.69 | 718.85 | 1435.71 | 718.36 | 13 |
| 5  | 572.25  | 286.63 | 554.24  | 277.62 | A | 1316.66 | 658.83 | 1299.63 | 650.32 | 1298.65 | 649.83 | 12 |
| 6  | 671.31  | 336.16 | 653.3   | 327.16 | V | 1245.62 | 623.31 | 1228.6  | 614.8  | 1227.61 | 614.31 | 11 |
| 7  | 770.38  | 385.7  | 752.37  | 376.69 | V | 1146.55 | 573.78 | 1129.53 | 565.27 | 1128.54 | 564.78 | 10 |
| 8  | 883.47  | 442.24 | 865.46  | 433.23 | L | 1047.49 | 524.25 | 1030.46 | 515.73 | 1029.47 | 515.24 | 9  |
| 9  | 970.5   | 485.75 | 952.49  | 476.75 | S | 934.4   | 467.7  | 917.37  | 459.19 | 916.39  | 458.7  | 8  |
| 10 | 1133.56 | 567.28 | 1115.55 | 558.28 | Y | 847.37  | 424.19 | 830.34  | 415.67 | 829.36  | 415.18 | 7  |
| 11 | 1190.58 | 595.8  | 1172.57 | 586.79 | G | 684.31  | 342.66 | 667.28  | 334.14 | 666.3   | 333.65 | 6  |
| 12 | 1261.62 | 631.31 | 1243.61 | 622.31 | A | 627.28  | 314.15 | 610.26  | 305.63 | 609.27  | 305.14 | 5  |
| 13 | 1390.66 | 695.84 | 1372.65 | 686.83 | E | 556.25  | 278.63 | 539.22  | 270.11 | 538.24  | 269.62 | 4  |
| 14 | 1505.69 | 753.35 | 1487.68 | 744.34 | D | 427.2   | 214.11 | 410.18  | 205.59 | 409.19  | 205.1  | 3  |
| 15 | 1642.75 | 821.88 | 1624.74 | 812.87 | H | 312.18  | 156.59 | 295.15  | 148.08 |         |        | 2  |
| 16 |         |        |         |        | R | 175.12  | 88.06  | 158.09  | 79.55  |         |        | 1  |

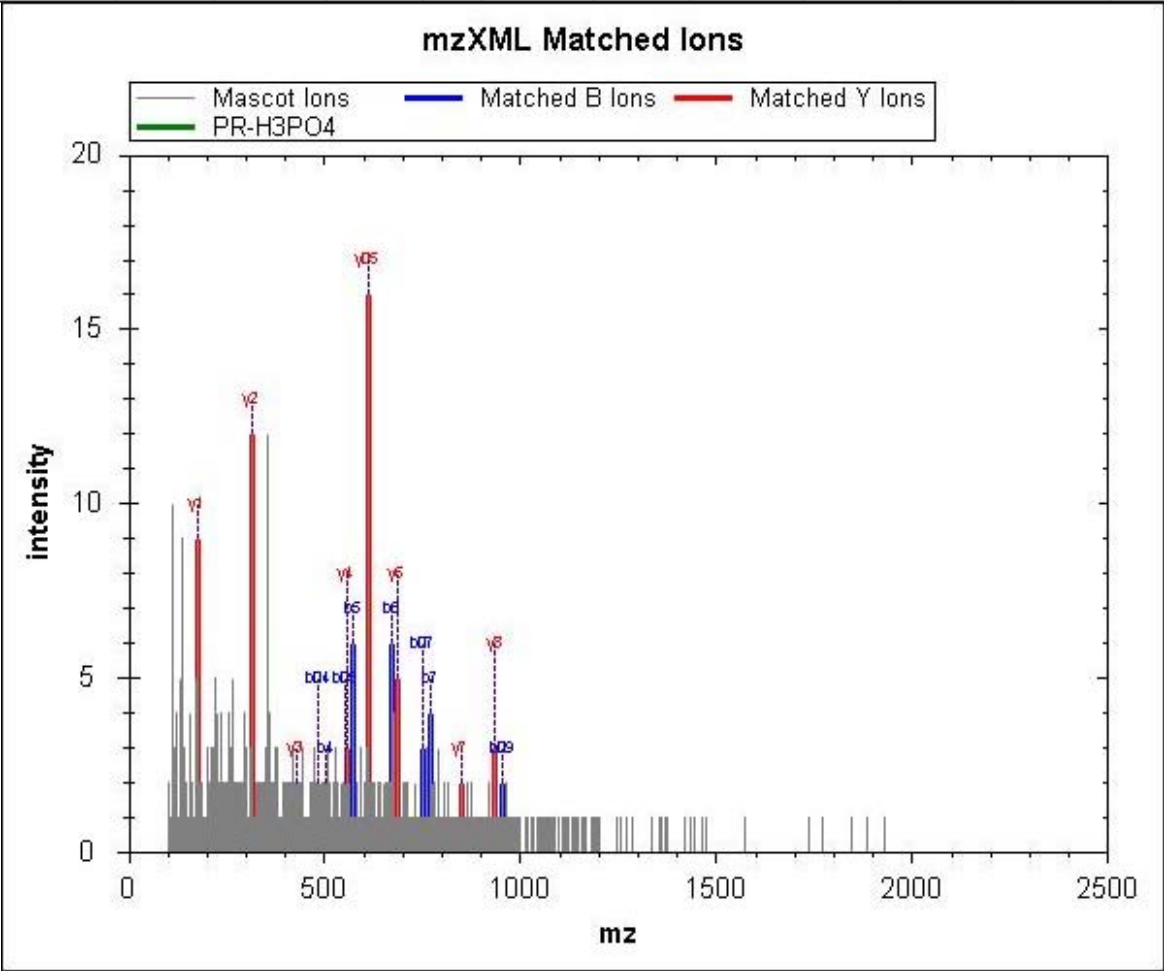

Protein index=1365, ACC No: IPI00013774

Peptide index=3813 MS/MS spectrum

Sequence: MTHNLLNYGLYR, m/z:812.42, charge:+ 2, Modification: Oxidation (M), Mod Position: 0.1000000000000000

Score: 54.89, Raw data:WET\_B3\_090616\_03.mzxml, MS/MS Elution time: 56.18966, Scan number:3044, Mass delta:0.0016, Rank:1

| No | b       | b++    | b*      | b*++   | b0      | b0++   | Seq | y       | y++    | y*      | y*++   | y0      | y0++  | RevNo |
|----|---------|--------|---------|--------|---------|--------|-----|---------|--------|---------|--------|---------|-------|-------|
| 1  | 148.04  | 74.52  |         |        |         |        | M   |         |        |         |        |         |       | 13    |
| 2  | 249.09  | 125.05 |         |        | 231.08  | 116.04 | T   | 1476.8  | 738.9  | 1459.77 | 730.39 | 1458.79 | 729.9 | 12    |
| 3  | 386.15  | 193.58 |         |        | 368.14  | 184.57 | H   | 1375.75 | 688.38 | 1358.72 | 679.86 |         |       | 11    |
| 4  | 500.19  | 250.6  | 483.17  | 242.09 | 482.18  | 241.59 | N   | 1238.69 | 619.85 | 1221.66 | 611.33 |         |       | 10    |
| 5  | 613.28  | 307.14 | 596.25  | 298.63 | 595.27  | 298.14 | L   | 1124.65 | 562.83 | 1107.62 | 554.31 |         |       | 9     |
| 6  | 726.36  | 363.68 | 709.33  | 355.17 | 708.35  | 354.68 | L   | 1011.56 | 506.28 | 994.54  | 497.77 |         |       | 8     |
| 7  | 839.44  | 420.23 | 822.42  | 411.71 | 821.43  | 411.22 | L   | 898.48  | 449.74 | 881.45  | 441.23 |         |       | 7     |
| 8  | 953.49  | 477.25 | 936.46  | 468.73 | 935.48  | 468.24 | N   | 785.39  | 393.2  | 768.37  | 384.69 |         |       | 6     |
| 9  | 1116.55 | 558.78 | 1099.52 | 550.27 | 1098.54 | 549.77 | Y   | 671.35  | 336.18 | 654.32  | 327.67 |         |       | 5     |
| 10 | 1173.57 | 587.29 | 1156.55 | 578.78 | 1155.56 | 578.28 | G   | 508.29  | 254.65 | 491.26  | 246.13 |         |       | 4     |
| 11 | 1286.66 | 643.83 | 1269.63 | 635.32 | 1268.65 | 634.83 | L   | 451.27  | 226.14 | 434.24  | 217.62 |         |       | 3     |
| 12 | 1449.72 | 725.36 | 1432.69 | 716.85 | 1431.71 | 716.36 | Y   | 338.18  | 169.59 | 321.16  | 161.08 |         |       | 2     |
| 13 |         |        |         |        |         |        | R   | 175.12  | 88.06  | 158.09  | 79.55  |         |       | 1     |

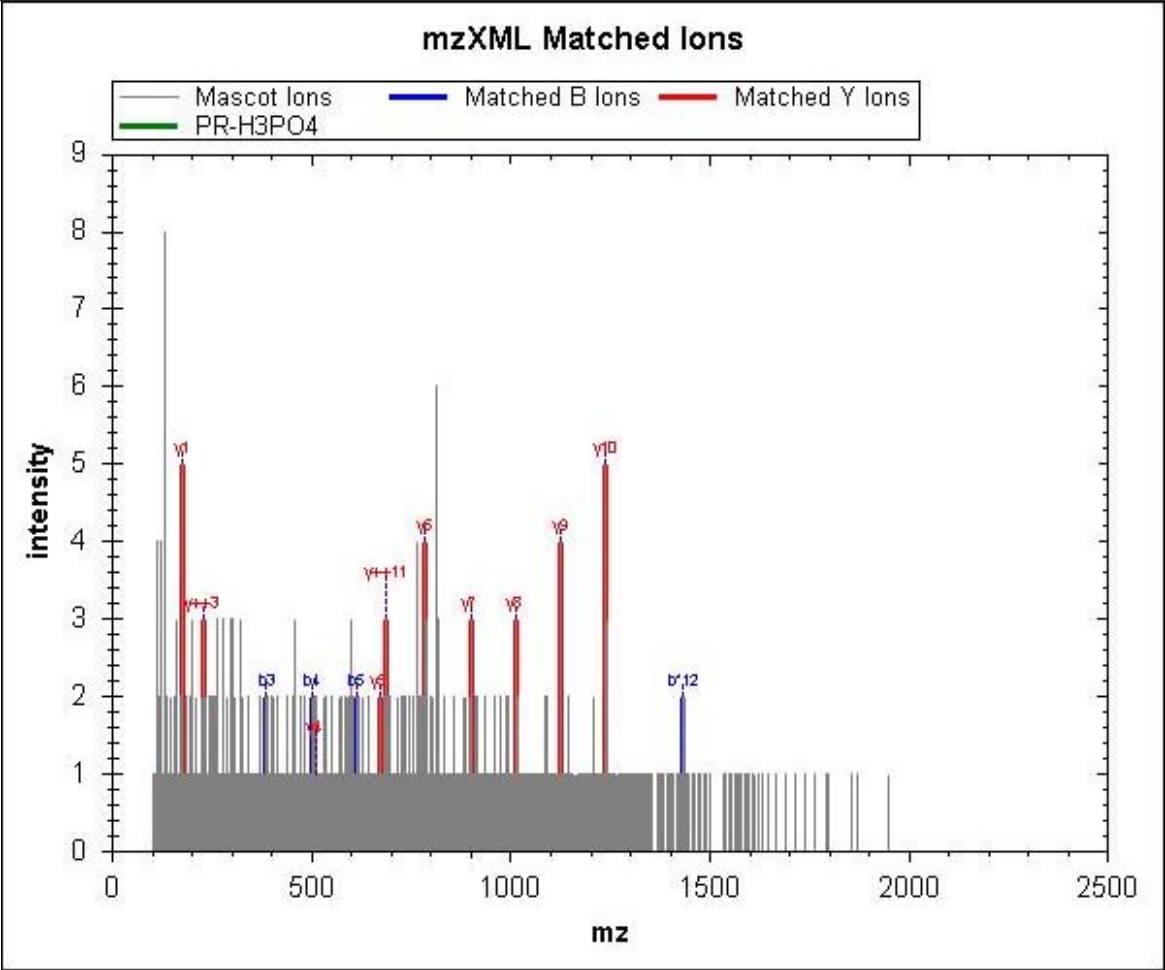

Protein index=1366, ACC No: IPI00296157

Peptide index=6721 MS/MS spectrum

Sequence: FLPLPVVQLLDR, m/z:705.4282, charge:+ 2, Modification: , Mod Position:

Score: 47.46, Raw data:WET\_B3\_090616\_03.mzxml, MS/MS Elution time: 94.88233, Scan number:5310,

Mass delta:-0.0024, Rank:1

| No | b       | b++    | b*      | b*++   | b0      | b0++   | Seq | y       | y++    | y*      | y*++   | y0      | y0++   | RevNo |
|----|---------|--------|---------|--------|---------|--------|-----|---------|--------|---------|--------|---------|--------|-------|
| 1  | 148.08  | 74.54  |         |        |         |        | F   |         |        |         |        |         |        | 12    |
| 2  | 261.16  | 131.08 |         |        |         |        | L   | 1262.78 | 631.9  | 1245.76 | 623.38 | 1244.77 | 622.89 | 11    |
| 3  | 358.21  | 179.61 |         |        |         |        | P   | 1149.7  | 575.35 | 1132.67 | 566.84 | 1131.69 | 566.35 | 10    |
| 4  | 471.3   | 236.15 |         |        |         |        | L   | 1052.65 | 526.83 | 1035.62 | 518.31 | 1034.64 | 517.82 | 9     |
| 5  | 568.35  | 284.68 |         |        |         |        | P   | 939.56  | 470.28 | 922.54  | 461.77 | 921.55  | 461.28 | 8     |
| 6  | 667.42  | 334.21 |         |        |         |        | V   | 842.51  | 421.76 | 825.48  | 413.25 | 824.5   | 412.75 | 7     |
| 7  | 766.49  | 383.75 |         |        |         |        | V   | 743.44  | 372.22 | 726.41  | 363.71 | 725.43  | 363.22 | 6     |
| 8  | 894.54  | 447.78 | 877.52  | 439.26 |         |        | Q   | 644.37  | 322.69 | 627.35  | 314.18 | 626.36  | 313.68 | 5     |
| 9  | 1007.63 | 504.32 | 990.6   | 495.8  |         |        | L   | 516.31  | 258.66 | 499.29  | 250.15 | 498.3   | 249.66 | 4     |
| 10 | 1120.71 | 560.86 | 1103.69 | 552.35 |         |        | L   | 403.23  | 202.12 | 386.2   | 193.61 | 385.22  | 193.11 | 3     |
| 11 | 1235.74 | 618.37 | 1218.71 | 609.86 | 1217.73 | 609.37 | D   | 290.15  | 145.58 | 273.12  | 137.06 | 272.14  | 136.57 | 2     |
| 12 |         |        |         |        |         |        | R   | 175.12  | 88.06  | 158.09  | 79.55  |         |        | 1     |

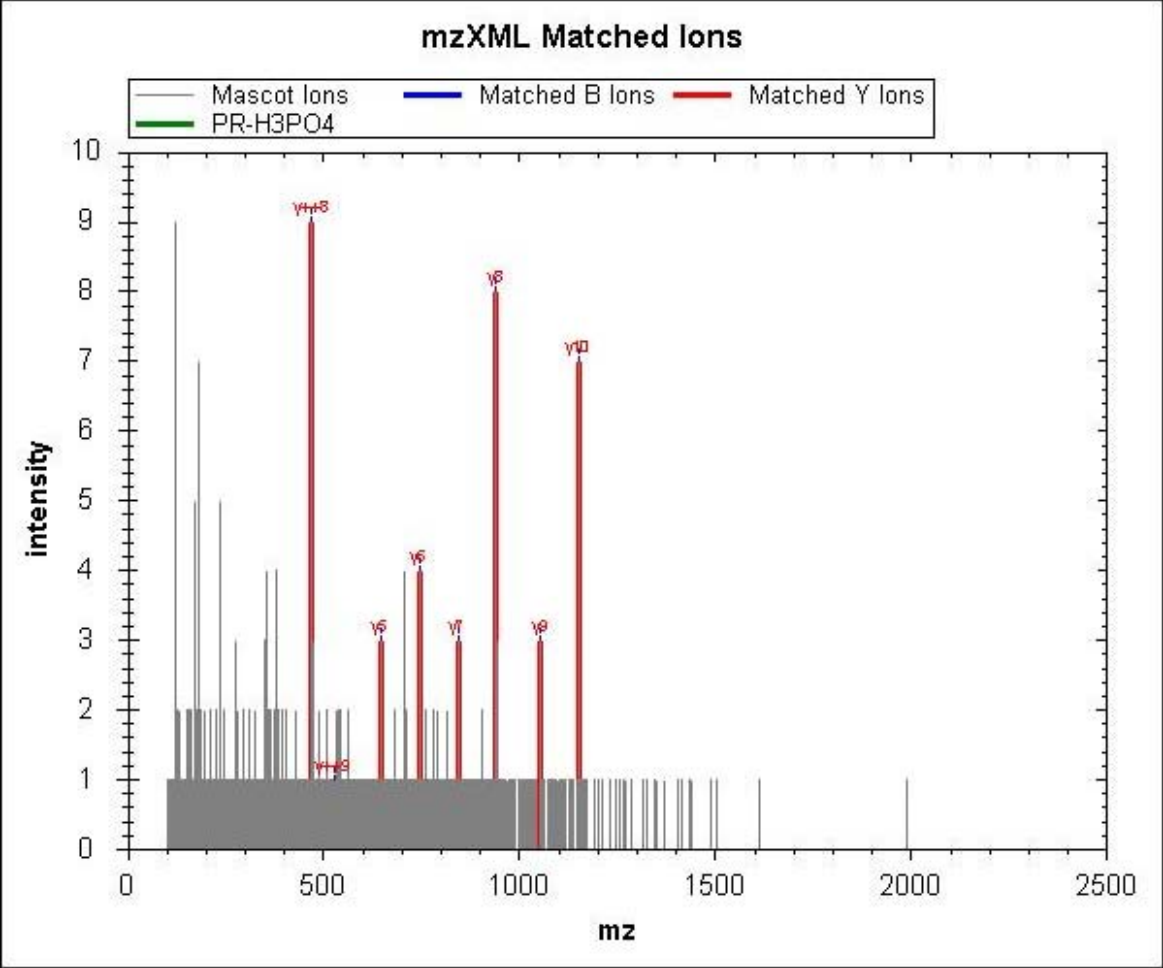

Protein index=1367, ACC No:IP100549357

Peptide index=6330 MS/MS spectrum

Sequence: FQTIDLSPFLFTR, m/z:792.9264, charge:+ 2, Modification: , Mod Position:

Score: 85.39, Raw data:WET\_B3\_090616\_03.mzxml, MS/MS Elution time: 86.3105, Scan number:4808,

Mass delta:0.0034, Rank:1

| No | b       | b++    | b*      | b*++   | b0      | b0++   | Seq | y       | y++    | y*      | y*++   | y0      | y0++   | RevNo |
|----|---------|--------|---------|--------|---------|--------|-----|---------|--------|---------|--------|---------|--------|-------|
| 1  | 148.08  | 74.54  |         |        |         |        | F   |         |        |         |        |         |        | 13    |
| 2  | 276.13  | 138.57 | 259.11  | 130.06 |         |        | Q   | 1437.77 | 719.39 | 1420.75 | 710.88 | 1419.76 | 710.39 | 12    |
| 3  | 377.18  | 189.09 | 360.16  | 180.58 | 359.17  | 180.09 | T   | 1309.72 | 655.36 | 1292.69 | 646.85 | 1291.7  | 646.36 | 11    |
| 4  | 490.27  | 245.64 | 473.24  | 237.12 | 472.26  | 236.63 | I   | 1208.67 | 604.84 | 1191.64 | 596.32 | 1190.66 | 595.83 | 10    |
| 5  | 605.29  | 303.15 | 588.27  | 294.64 | 587.28  | 294.14 | D   | 1095.58 | 548.3  | 1078.56 | 539.78 | 1077.57 | 539.29 | 9     |
| 6  | 718.38  | 359.69 | 701.35  | 351.18 | 700.37  | 350.69 | L   | 980.56  | 490.78 | 963.53  | 482.27 | 962.55  | 481.78 | 8     |
| 7  | 805.41  | 403.21 | 788.38  | 394.69 | 787.4   | 394.2  | S   | 867.47  | 434.24 | 850.45  | 425.73 | 849.46  | 425.23 | 7     |
| 8  | 902.46  | 451.73 | 885.44  | 443.22 | 884.45  | 442.73 | P   | 780.44  | 390.72 | 763.41  | 382.21 | 762.43  | 381.72 | 6     |
| 9  | 1049.53 | 525.27 | 1032.5  | 516.76 | 1031.52 | 516.26 | F   | 683.39  | 342.2  | 666.36  | 333.68 | 665.38  | 333.19 | 5     |
| 10 | 1162.61 | 581.81 | 1145.59 | 573.3  | 1144.6  | 572.81 | L   | 536.32  | 268.66 | 519.29  | 260.15 | 518.31  | 259.66 | 4     |
| 11 | 1309.68 | 655.35 | 1292.66 | 646.83 | 1291.67 | 646.34 | F   | 423.24  | 212.12 | 406.21  | 203.61 | 405.22  | 203.12 | 3     |
| 12 | 1410.73 | 705.87 | 1393.7  | 697.36 | 1392.72 | 696.86 | T   | 276.17  | 138.59 | 259.14  | 130.07 | 258.16  | 129.58 | 2     |
| 13 |         |        |         |        |         |        | R   | 175.12  | 88.06  | 158.09  | 79.55  |         |        | 1     |

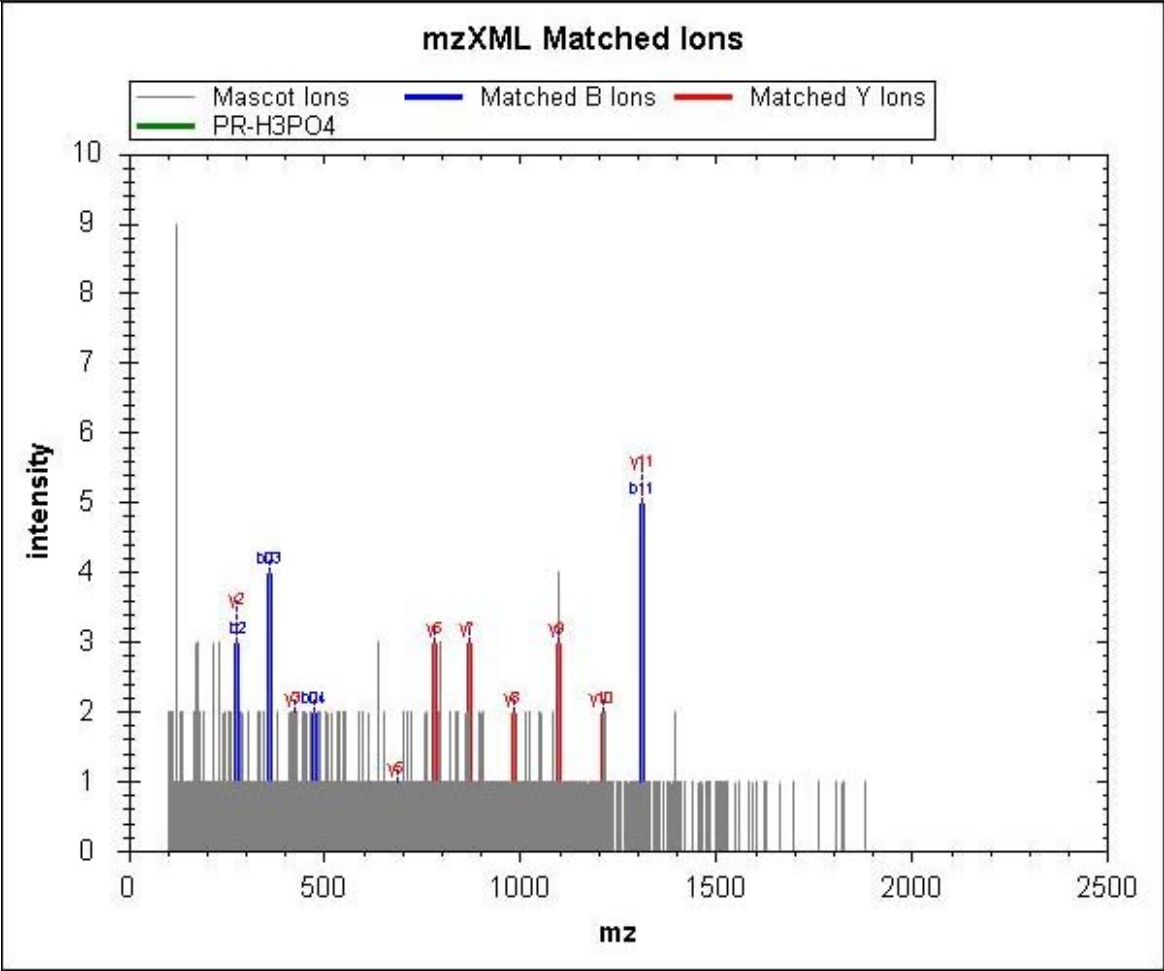

Protein index=1368, ACC No:IPI00328443

Peptide index=5645 MS/MS spectrum

Sequence: HLVDPIDDLFLAAK, m/z:783.9286, charge:+ 2, Modification: , Mod Position:

Score: 63.05, Raw data:WET\_B3\_090616\_03.mzxml, MS/MS Elution time: 76.37133, Scan number:4226, Mass delta:-0.0026, Rank:1

| No | b       | b++    | b0      | b0++   | Seq | y       | y++    | y*      | y*++   | y0      | y0++   | RevNo |
|----|---------|--------|---------|--------|-----|---------|--------|---------|--------|---------|--------|-------|
| 1  | 138.07  | 69.54  |         |        | H   |         |        |         |        |         |        | 14    |
| 2  | 251.15  | 126.08 |         |        | L   | 1429.79 | 715.4  | 1412.77 | 706.89 | 1411.78 | 706.4  | 13    |
| 3  | 350.22  | 175.61 |         |        | V   | 1316.71 | 658.86 | 1299.68 | 650.35 | 1298.7  | 649.85 | 12    |
| 4  | 465.25  | 233.13 | 447.24  | 224.12 | D   | 1217.64 | 609.32 | 1200.61 | 600.81 | 1199.63 | 600.32 | 11    |
| 5  | 562.3   | 281.65 | 544.29  | 272.65 | P   | 1102.61 | 551.81 | 1085.59 | 543.3  | 1084.6  | 542.81 | 10    |
| 6  | 675.38  | 338.19 | 657.37  | 329.19 | I   | 1005.56 | 503.28 | 988.53  | 494.77 | 987.55  | 494.28 | 9     |
| 7  | 790.41  | 395.71 | 772.4   | 386.7  | D   | 892.48  | 446.74 | 875.45  | 438.23 | 874.47  | 437.74 | 8     |
| 8  | 905.44  | 453.22 | 887.43  | 444.22 | D   | 777.45  | 389.23 | 760.42  | 380.72 | 759.44  | 380.22 | 7     |
| 9  | 1018.52 | 509.76 | 1000.51 | 500.76 | L   | 662.42  | 331.72 | 645.4   | 323.2  |         |        | 6     |
| 10 | 1165.59 | 583.3  | 1147.58 | 574.29 | F   | 549.34  | 275.17 | 532.31  | 266.66 |         |        | 5     |
| 11 | 1278.67 | 639.84 | 1260.66 | 630.83 | L   | 402.27  | 201.64 | 385.24  | 193.13 |         |        | 4     |
| 12 | 1349.71 | 675.36 | 1331.7  | 666.35 | A   | 289.19  | 145.1  | 272.16  | 136.58 |         |        | 3     |
| 13 | 1420.75 | 710.88 | 1402.74 | 701.87 | A   | 218.15  | 109.58 | 201.12  | 101.07 |         |        | 2     |
| 14 |         |        |         |        | K   | 147.11  | 74.06  | 130.09  | 65.55  |         |        | 1     |

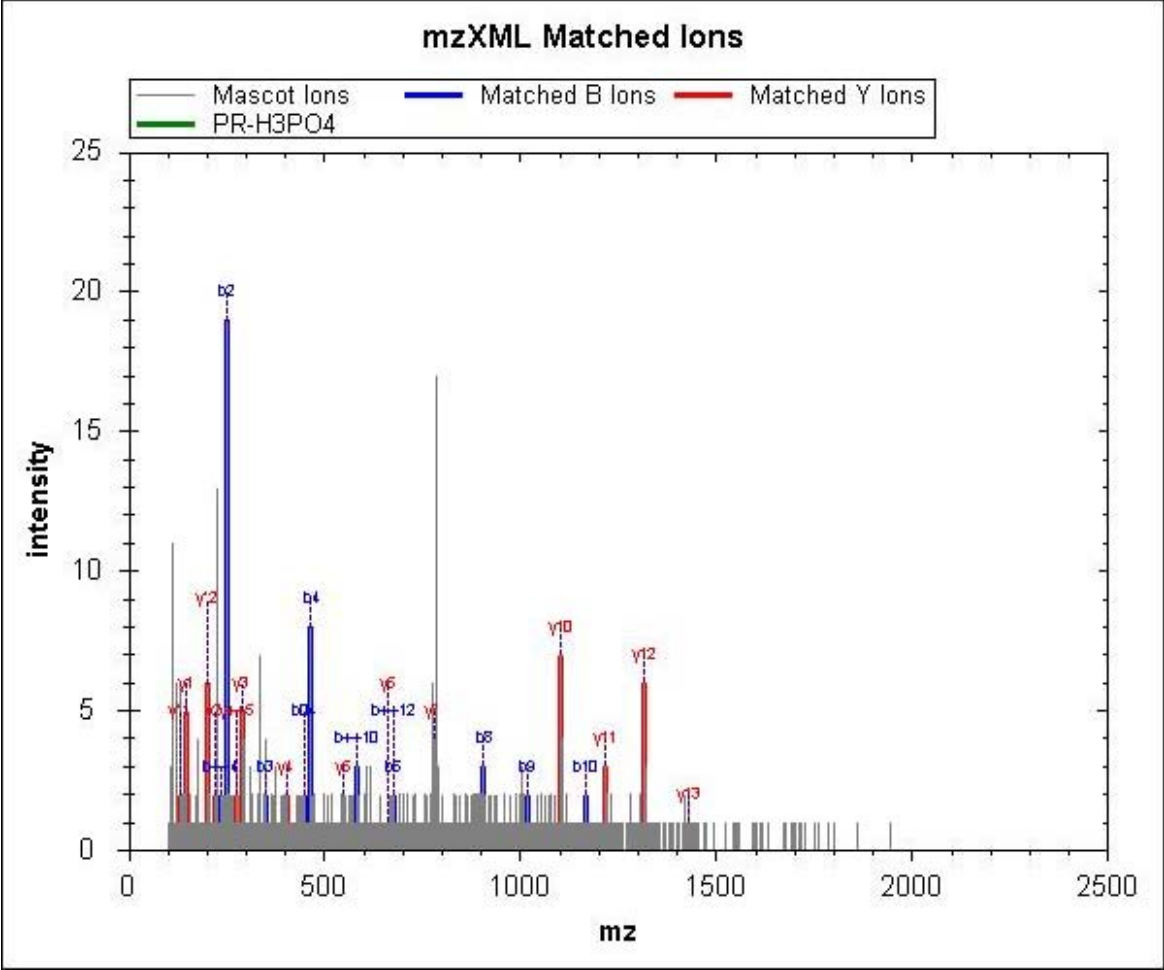

Protein index=1369, ACC No:IP100024567

Peptide index=6657 MS/MS spectrum

Sequence: LAQEPLGLEVDQFLEDVR, m/z:1036.038, charge:+ 2, Modification: , Mod Position:

Score: 39.8, Raw data:WET\_B3\_090616\_03.mzxml, MS/MS Elution time: 93.209, Scan number:5212, Mass delta:-0.0025, Rank:1

| No | b       | b++    | b*      | b*++   | b0      | b0++   | Seq | y       | y++    | y*      | y*++   | y0      | y0++   | RevNo |
|----|---------|--------|---------|--------|---------|--------|-----|---------|--------|---------|--------|---------|--------|-------|
| 1  | 114.09  | 57.55  |         |        |         |        | L   |         |        |         |        |         |        | 18    |
| 2  | 185.13  | 93.07  |         |        |         |        | A   | 1957.99 | 979.5  | 1940.96 | 970.98 | 1939.98 | 970.49 | 17    |
| 3  | 313.19  | 157.1  | 296.16  | 148.58 |         |        | Q   | 1886.95 | 943.98 | 1869.92 | 935.47 | 1868.94 | 934.97 | 16    |
| 4  | 442.23  | 221.62 | 425.2   | 213.11 | 424.22  | 212.61 | E   | 1758.89 | 879.95 | 1741.86 | 871.44 | 1740.88 | 870.94 | 15    |
| 5  | 539.28  | 270.14 | 522.26  | 261.63 | 521.27  | 261.14 | P   | 1629.85 | 815.43 | 1612.82 | 806.91 | 1611.84 | 806.42 | 14    |
| 6  | 652.37  | 326.69 | 635.34  | 318.17 | 634.36  | 317.68 | L   | 1532.8  | 766.9  | 1515.77 | 758.39 | 1514.78 | 757.9  | 13    |
| 7  | 709.39  | 355.2  | 692.36  | 346.68 | 691.38  | 346.19 | G   | 1419.71 | 710.36 | 1402.68 | 701.85 | 1401.7  | 701.35 | 12    |
| 8  | 822.47  | 411.74 | 805.45  | 403.23 | 804.46  | 402.73 | L   | 1362.69 | 681.85 | 1345.66 | 673.34 | 1344.68 | 672.84 | 11    |
| 9  | 951.51  | 476.26 | 934.49  | 467.75 | 933.5   | 467.26 | E   | 1249.61 | 625.31 | 1232.58 | 616.79 | 1231.6  | 616.3  | 10    |
| 10 | 1050.58 | 525.8  | 1033.56 | 517.28 | 1032.57 | 516.79 | V   | 1120.56 | 560.79 | 1103.54 | 552.27 | 1102.55 | 551.78 | 9     |
| 11 | 1165.61 | 583.31 | 1148.58 | 574.8  | 1147.6  | 574.3  | D   | 1021.49 | 511.25 | 1004.47 | 502.74 | 1003.48 | 502.25 | 8     |
| 12 | 1293.67 | 647.34 | 1276.64 | 638.82 | 1275.66 | 638.33 | Q   | 906.47  | 453.74 | 889.44  | 445.22 | 888.46  | 444.73 | 7     |
| 13 | 1440.74 | 720.87 | 1423.71 | 712.36 | 1422.73 | 711.87 | F   | 778.41  | 389.71 | 761.38  | 381.2  | 760.4   | 380.7  | 6     |
| 14 | 1553.82 | 777.41 | 1536.79 | 768.9  | 1535.81 | 768.41 | L   | 631.34  | 316.17 | 614.31  | 307.66 | 613.33  | 307.17 | 5     |
| 15 | 1682.86 | 841.94 | 1665.84 | 833.42 | 1664.85 | 832.93 | E   | 518.26  | 259.63 | 501.23  | 251.12 | 500.25  | 250.63 | 4     |
| 16 | 1797.89 | 899.45 | 1780.86 | 890.94 | 1779.88 | 890.44 | D   | 389.21  | 195.11 | 372.19  | 186.6  | 371.2   | 186.11 | 3     |
| 17 | 1896.96 | 948.98 | 1879.93 | 940.47 | 1878.95 | 939.98 | V   | 274.19  | 137.6  | 257.16  | 129.08 |         |        | 2     |
| 18 |         |        |         |        |         |        | R   | 175.12  | 88.06  | 158.09  | 79.55  |         |        | 1     |

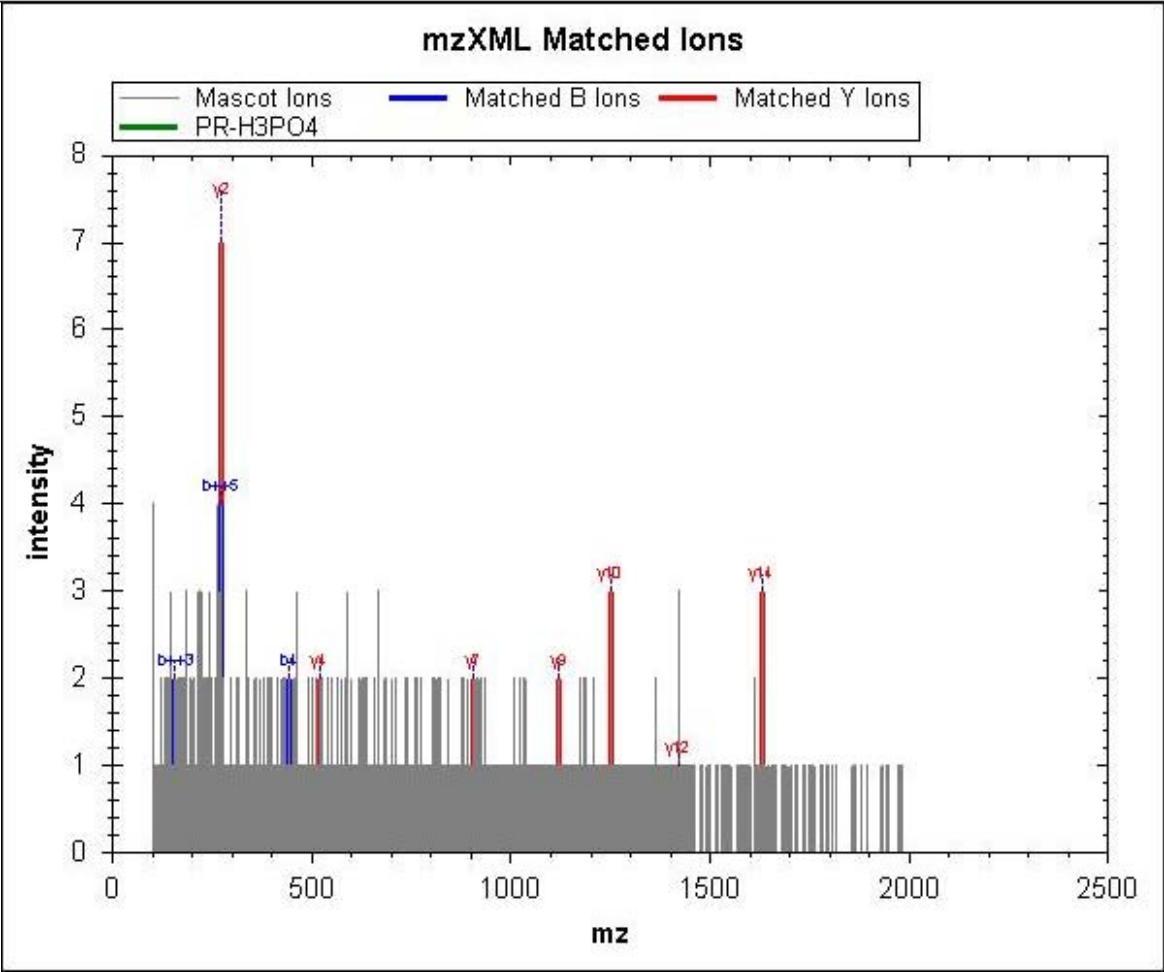

Protein index=1370, ACC No:IP100007183

Peptide index=6189 MS/MS spectrum

Sequence: NLVPLLLAPENLVEK, m/z:831.4891, charge:+ 2, Modification: , Mod Position:

Score: 34.53, Raw data:WET\_B3\_090616\_03.mzxml, MS/MS Elution time: 83.698, Scan number:4655, Mass delta:-0.0126, Rank:1

| No | b       | b++    | b*      | b*++   | b0      | b0++   | Seq | y       | y++    | y*      | y*++   | y0      | y0++   | RevNo |
|----|---------|--------|---------|--------|---------|--------|-----|---------|--------|---------|--------|---------|--------|-------|
| 1  | 115.05  | 58.03  | 98.02   | 49.52  |         |        | N   |         |        |         |        |         |        | 15    |
| 2  | 228.13  | 114.57 | 211.11  | 106.06 |         |        | L   | 1547.94 | 774.47 | 1530.91 | 765.96 | 1529.93 | 765.47 | 14    |
| 3  | 327.2   | 164.1  | 310.18  | 155.59 |         |        | V   | 1434.86 | 717.93 | 1417.83 | 709.42 | 1416.85 | 708.93 | 13    |
| 4  | 424.26  | 212.63 | 407.23  | 204.12 |         |        | P   | 1335.79 | 668.4  | 1318.76 | 659.88 | 1317.78 | 659.39 | 12    |
| 5  | 537.34  | 269.17 | 520.31  | 260.66 |         |        | L   | 1238.74 | 619.87 | 1221.71 | 611.36 | 1220.72 | 610.87 | 11    |
| 6  | 650.42  | 325.72 | 633.4   | 317.2  |         |        | L   | 1125.65 | 563.33 | 1108.62 | 554.82 | 1107.64 | 554.32 | 10    |
| 7  | 763.51  | 382.26 | 746.48  | 373.74 |         |        | L   | 1012.57 | 506.79 | 995.54  | 498.27 | 994.56  | 497.78 | 9     |
| 8  | 834.54  | 417.78 | 817.52  | 409.26 |         |        | A   | 899.48  | 450.25 | 882.46  | 441.73 | 881.47  | 441.24 | 8     |
| 9  | 931.6   | 466.3  | 914.57  | 457.79 |         |        | P   | 828.45  | 414.73 | 811.42  | 406.21 | 810.44  | 405.72 | 7     |
| 10 | 1060.64 | 530.82 | 1043.61 | 522.31 | 1042.63 | 521.82 | E   | 731.39  | 366.2  | 714.37  | 357.69 | 713.38  | 357.2  | 6     |
| 11 | 1174.68 | 587.85 | 1157.66 | 579.33 | 1156.67 | 578.84 | N   | 602.35  | 301.68 | 585.32  | 293.17 | 584.34  | 292.67 | 5     |
| 12 | 1287.77 | 644.39 | 1270.74 | 635.87 | 1269.76 | 635.38 | L   | 488.31  | 244.66 | 471.28  | 236.14 | 470.3   | 235.65 | 4     |

|    |         |        |         |        |         |        |   |        |        |        |        |        |        |   |
|----|---------|--------|---------|--------|---------|--------|---|--------|--------|--------|--------|--------|--------|---|
| 13 | 1386.84 | 693.92 | 1369.81 | 685.41 | 1368.82 | 684.92 | V | 375.22 | 188.12 | 358.2  | 179.6  | 357.21 | 179.11 | 3 |
| 14 | 1515.88 | 758.44 | 1498.85 | 749.93 | 1497.87 | 749.44 | E | 276.16 | 138.58 | 259.13 | 130.07 | 258.14 | 129.58 | 2 |
| 15 |         |        |         |        |         |        | K | 147.11 | 74.06  | 130.09 | 65.55  |        |        | 1 |

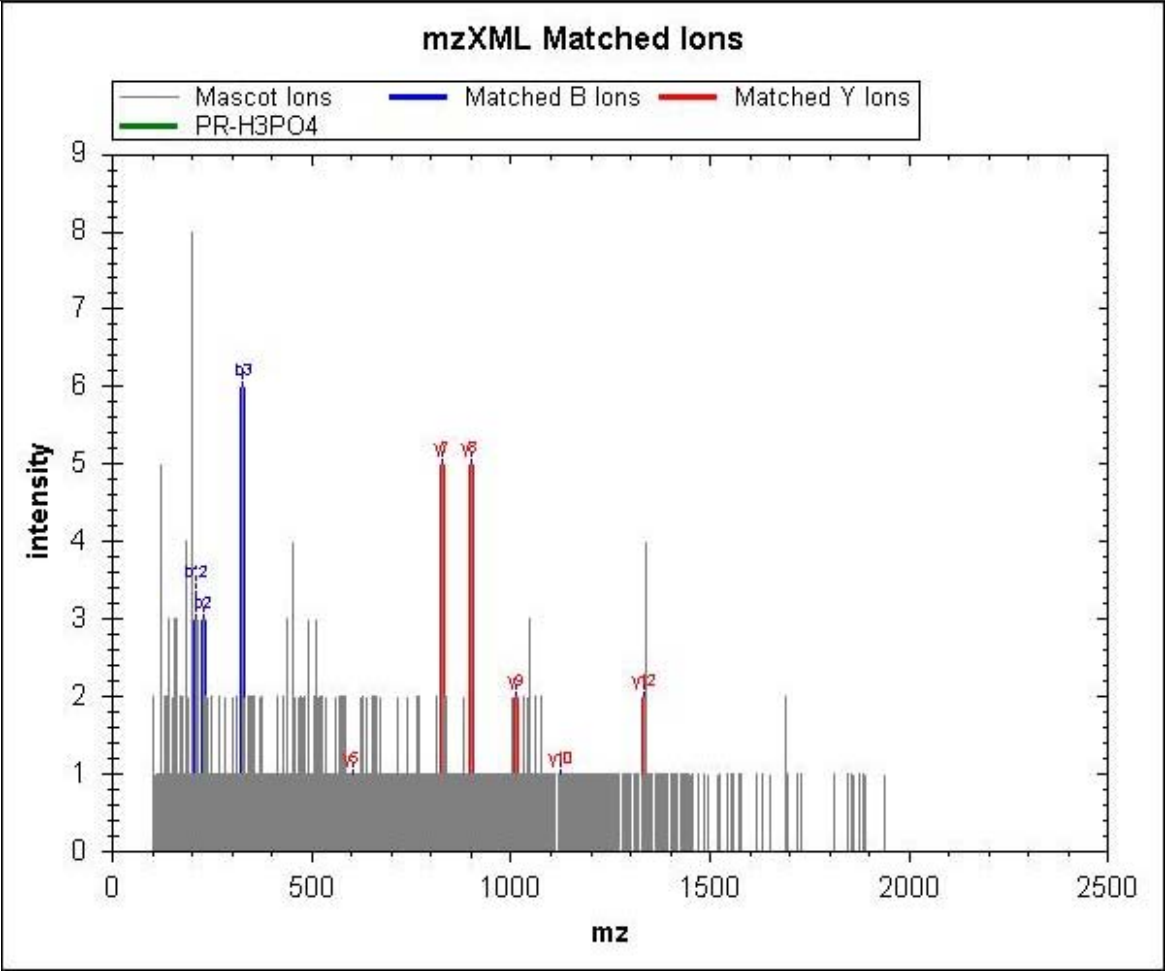

Protein index=1371, ACC No:IPI00413214

Peptide index=7183 MS/MS spectrum

Sequence: AQIQAVIDANIFPVLIEILQK, m/z:779.4553, charge:+ 3, Modification: , Mod Position:

Score: 38.1, Raw data:WET\_B3\_090616\_03.mzxml, MS/MS Elution time: 110.5478, Scan number:6236, Mass delta:-0.0074, Rank:1

| No | b      | b++    | b*     | b*++   | b0     | b0++   | Seq | y       | y++     | y*      | y*++    | y0      | y0++    | RevNo |
|----|--------|--------|--------|--------|--------|--------|-----|---------|---------|---------|---------|---------|---------|-------|
| 1  | 72.04  | 36.53  |        |        |        |        | A   |         |         |         |         |         |         | 21    |
| 2  | 200.1  | 100.56 | 183.08 | 92.04  |        |        | Q   | 2265.32 | 1133.16 | 2248.3  | 1124.65 | 2247.31 | 1124.16 | 20    |
| 3  | 313.19 | 157.1  | 296.16 | 148.58 |        |        | I   | 2137.26 | 1069.14 | 2120.24 | 1060.62 | 2119.25 | 1060.13 | 19    |
| 4  | 441.25 | 221.13 | 424.22 | 212.61 |        |        | Q   | 2024.18 | 1012.59 | 2007.15 | 1004.08 | 2006.17 | 1003.59 | 18    |
| 5  | 512.28 | 256.64 | 495.26 | 248.13 |        |        | A   | 1896.12 | 948.56  | 1879.09 | 940.05  | 1878.11 | 939.56  | 17    |
| 6  | 611.35 | 306.18 | 594.32 | 297.67 |        |        | V   | 1825.08 | 913.05  | 1808.06 | 904.53  | 1807.07 | 904.04  | 16    |
| 7  | 724.44 | 362.72 | 707.41 | 354.21 |        |        | I   | 1726.02 | 863.51  | 1708.99 | 855     | 1708    | 854.51  | 15    |
| 8  | 839.46 | 420.23 | 822.44 | 411.72 | 821.45 | 411.23 | D   | 1612.93 | 806.97  | 1595.9  | 798.46  | 1594.92 | 797.96  | 14    |
| 9  | 910.5  | 455.75 | 893.47 | 447.24 | 892.49 | 446.75 | A   | 1497.9  | 749.46  | 1480.88 | 740.94  | 1479.89 | 740.45  | 13    |

|    |         |         |         |         |         |         |   |         |        |         |        |         |        |    |
|----|---------|---------|---------|---------|---------|---------|---|---------|--------|---------|--------|---------|--------|----|
| 10 | 1024.54 | 512.77  | 1007.52 | 504.26  | 1006.53 | 503.77  | N | 1426.87 | 713.94 | 1409.84 | 705.42 | 1408.86 | 704.93 | 12 |
| 11 | 1137.63 | 569.32  | 1120.6  | 560.8   | 1119.62 | 560.31  | I | 1312.82 | 656.92 | 1295.8  | 648.4  | 1294.81 | 647.91 | 11 |
| 12 | 1284.69 | 642.85  | 1267.67 | 634.34  | 1266.68 | 633.85  | F | 1199.74 | 600.37 | 1182.71 | 591.86 | 1181.73 | 591.37 | 10 |
| 13 | 1381.75 | 691.38  | 1364.72 | 682.86  | 1363.74 | 682.37  | P | 1052.67 | 526.84 | 1035.64 | 518.33 | 1034.66 | 517.83 | 9  |
| 14 | 1480.82 | 740.91  | 1463.79 | 732.4   | 1462.81 | 731.91  | V | 955.62  | 478.31 | 938.59  | 469.8  | 937.61  | 469.31 | 8  |
| 15 | 1593.9  | 797.45  | 1576.87 | 788.94  | 1575.89 | 788.45  | L | 856.55  | 428.78 | 839.52  | 420.27 | 838.54  | 419.77 | 7  |
| 16 | 1706.98 | 854     | 1689.96 | 845.48  | 1688.97 | 844.99  | I | 743.47  | 372.24 | 726.44  | 363.72 | 725.46  | 363.23 | 6  |
| 17 | 1836.03 | 918.52  | 1819    | 910     | 1818.02 | 909.51  | E | 630.38  | 315.69 | 613.36  | 307.18 | 612.37  | 306.69 | 5  |
| 18 | 1949.11 | 975.06  | 1932.08 | 966.55  | 1931.1  | 966.05  | I | 501.34  | 251.17 | 484.31  | 242.66 |         |        | 4  |
| 19 | 2062.19 | 1031.6  | 2045.17 | 1023.09 | 2044.18 | 1022.6  | L | 388.26  | 194.63 | 371.23  | 186.12 |         |        | 3  |
| 20 | 2190.25 | 1095.63 | 2173.23 | 1087.12 | 2172.24 | 1086.62 | Q | 275.17  | 138.09 | 258.14  | 129.58 |         |        | 2  |
| 21 |         |         |         |         |         |         | K | 147.11  | 74.06  | 130.09  | 65.55  |         |        | 1  |

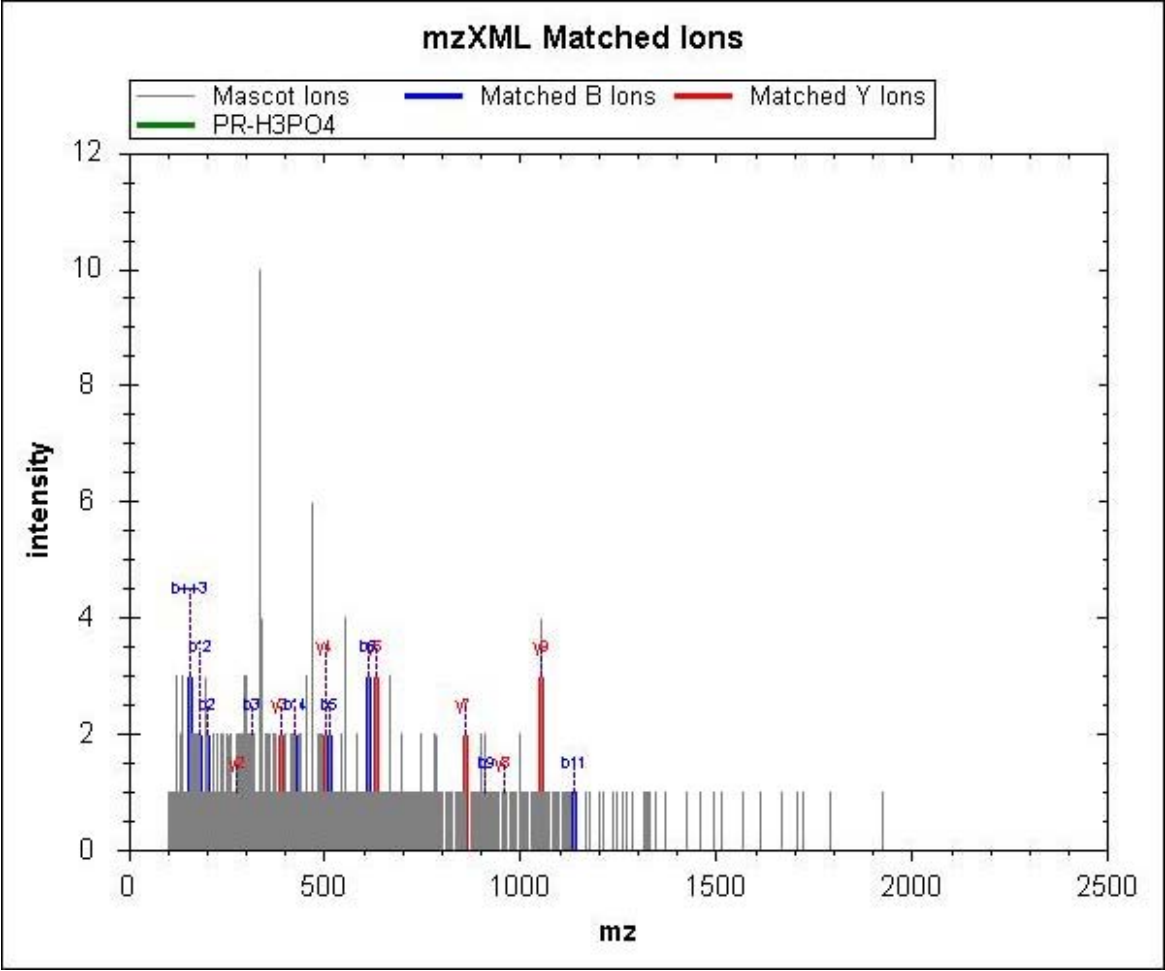

Protein index=1372, ACC No: IPI00183297

Peptide index=5523 MS/MS spectrum

Sequence: LQIQLPDSVNQLLR, m/z:818.9681, charge:+ 2, Modification: , Mod Position:

Score: 41.39, Raw data:WET\_B3\_090616\_03.mzxml, MS/MS Elution time: 74.59583, Scan number:4122, Mass delta:-0.0091, Rank:1

| No | b | b++ | b* | b*++ | b0 | b0++ | Seq | y | y++ | y* | y*++ | y0 | y0++ | RevNo |
|----|---|-----|----|------|----|------|-----|---|-----|----|------|----|------|-------|
|----|---|-----|----|------|----|------|-----|---|-----|----|------|----|------|-------|

|    |         |        |         |        |         |        |   |         |        |         |        |         |        |    |
|----|---------|--------|---------|--------|---------|--------|---|---------|--------|---------|--------|---------|--------|----|
| 1  | 114.09  | 57.55  |         |        |         |        | L |         |        |         |        |         |        | 14 |
| 2  | 242.15  | 121.58 | 225.12  | 113.07 |         |        | Q | 1523.85 | 762.43 | 1506.83 | 753.92 | 1505.84 | 753.43 | 13 |
| 3  | 355.23  | 178.12 | 338.21  | 169.61 |         |        | I | 1395.8  | 698.4  | 1378.77 | 689.89 | 1377.78 | 689.4  | 12 |
| 4  | 483.29  | 242.15 | 466.27  | 233.64 |         |        | Q | 1282.71 | 641.86 | 1265.68 | 633.35 | 1264.7  | 632.85 | 11 |
| 5  | 596.38  | 298.69 | 579.35  | 290.18 |         |        | L | 1154.65 | 577.83 | 1137.63 | 569.32 | 1136.64 | 568.82 | 10 |
| 6  | 693.43  | 347.22 | 676.4   | 338.71 |         |        | P | 1041.57 | 521.29 | 1024.54 | 512.77 | 1023.56 | 512.28 | 9  |
| 7  | 808.46  | 404.73 | 791.43  | 396.22 | 790.45  | 395.73 | D | 944.52  | 472.76 | 927.49  | 464.25 | 926.51  | 463.76 | 8  |
| 8  | 895.49  | 448.25 | 878.46  | 439.73 | 877.48  | 439.24 | S | 829.49  | 415.25 | 812.46  | 406.73 | 811.48  | 406.24 | 7  |
| 9  | 994.56  | 497.78 | 977.53  | 489.27 | 976.55  | 488.78 | V | 742.46  | 371.73 | 725.43  | 363.22 |         |        | 6  |
| 10 | 1108.6  | 554.8  | 1091.57 | 546.29 | 1090.59 | 545.8  | N | 643.39  | 322.2  | 626.36  | 313.68 |         |        | 5  |
| 11 | 1236.66 | 618.83 | 1219.63 | 610.32 | 1218.65 | 609.83 | Q | 529.35  | 265.18 | 512.32  | 256.66 |         |        | 4  |
| 12 | 1349.74 | 675.37 | 1332.72 | 666.86 | 1331.73 | 666.37 | L | 401.29  | 201.15 | 384.26  | 192.63 |         |        | 3  |
| 13 | 1462.83 | 731.92 | 1445.8  | 723.4  | 1444.82 | 722.91 | L | 288.2   | 144.61 | 271.18  | 136.09 |         |        | 2  |
| 14 |         |        |         |        |         |        | R | 175.12  | 88.06  | 158.09  | 79.55  |         |        | 1  |

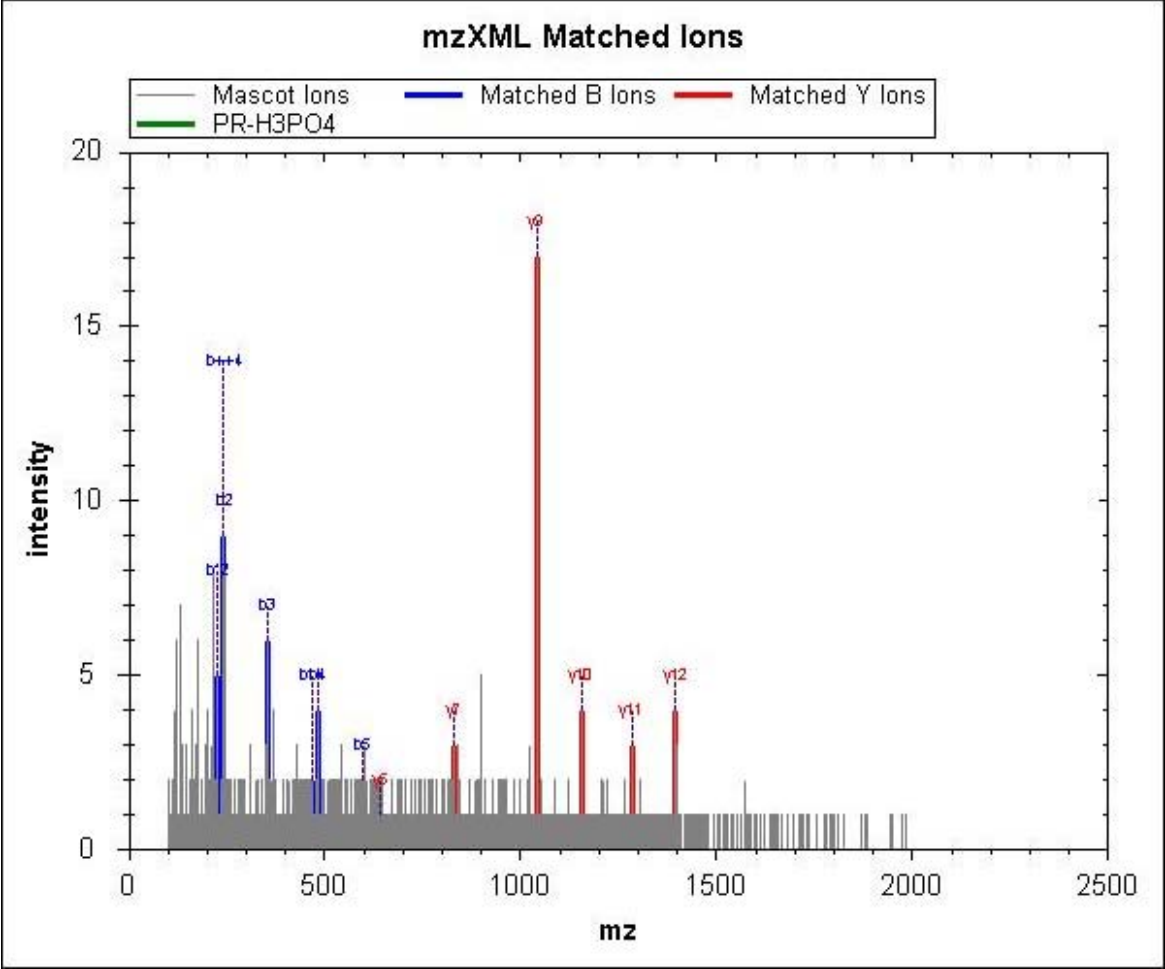

Protein index=1373, ACC No:IP100017184

Peptide index=5619 MS/MS spectrum

Sequence: VYIGSFWSHPLLIPDNR, m/z:672.0212, charge:+ 3, Modification: , Mod Position:

Score: 71.93, Raw data:WET\_B3\_090616\_03.mzxml, MS/MS Elution time: 76.04467, Scan number:4207, Mass delta:-0.0056, Rank:1

| No | b       | b++    | b*      | b*++   | b0      | b0++   | Seq | y       | y++    | y*      | y*++   | y0      | y0++   | RevNo |
|----|---------|--------|---------|--------|---------|--------|-----|---------|--------|---------|--------|---------|--------|-------|
| 1  | 100.08  | 50.54  |         |        |         |        | V   |         |        |         |        |         |        | 17    |
| 2  | 263.14  | 132.07 |         |        |         |        | Y   | 1914.99 | 958    | 1897.96 | 949.48 | 1896.98 | 948.99 | 16    |
| 3  | 376.22  | 188.62 |         |        |         |        | I   | 1751.92 | 876.47 | 1734.9  | 867.95 | 1733.91 | 867.46 | 15    |
| 4  | 433.24  | 217.13 |         |        |         |        | G   | 1638.84 | 819.92 | 1621.81 | 811.41 | 1620.83 | 810.92 | 14    |
| 5  | 520.28  | 260.64 |         |        | 502.27  | 251.64 | S   | 1581.82 | 791.41 | 1564.79 | 782.9  | 1563.81 | 782.41 | 13    |
| 6  | 667.34  | 334.18 |         |        | 649.33  | 325.17 | F   | 1494.79 | 747.9  | 1477.76 | 739.38 | 1476.77 | 738.89 | 12    |
| 7  | 853.42  | 427.22 |         |        | 835.41  | 418.21 | W   | 1347.72 | 674.36 | 1330.69 | 665.85 | 1329.71 | 665.36 | 11    |
| 8  | 940.46  | 470.73 |         |        | 922.45  | 461.73 | S   | 1161.64 | 581.32 | 1144.61 | 572.81 | 1143.63 | 572.32 | 10    |
| 9  | 1077.52 | 539.26 |         |        | 1059.5  | 530.26 | H   | 1074.61 | 537.81 | 1057.58 | 529.29 | 1056.59 | 528.8  | 9     |
| 10 | 1174.57 | 587.79 |         |        | 1156.56 | 578.78 | P   | 937.55  | 469.28 | 920.52  | 460.76 | 919.54  | 460.27 | 8     |
| 11 | 1287.65 | 644.33 |         |        | 1269.64 | 635.32 | L   | 840.49  | 420.75 | 823.47  | 412.24 | 822.48  | 411.75 | 7     |
| 12 | 1400.74 | 700.87 |         |        | 1382.73 | 691.87 | L   | 727.41  | 364.21 | 710.38  | 355.7  | 709.4   | 355.2  | 6     |
| 13 | 1513.82 | 757.41 |         |        | 1495.81 | 748.41 | I   | 614.33  | 307.67 | 597.3   | 299.15 | 596.32  | 298.66 | 5     |
| 14 | 1610.87 | 805.94 |         |        | 1592.86 | 796.93 | P   | 501.24  | 251.12 | 484.22  | 242.61 | 483.23  | 242.12 | 4     |
| 15 | 1725.9  | 863.45 |         |        | 1707.89 | 854.45 | D   | 404.19  | 202.6  | 387.16  | 194.08 | 386.18  | 193.59 | 3     |
| 16 | 1839.94 | 920.48 | 1822.92 | 911.96 | 1821.93 | 911.47 | N   | 289.16  | 145.08 | 272.14  | 136.57 |         |        | 2     |
| 17 |         |        |         |        |         |        | R   | 175.12  | 88.06  | 158.09  | 79.55  |         |        | 1     |

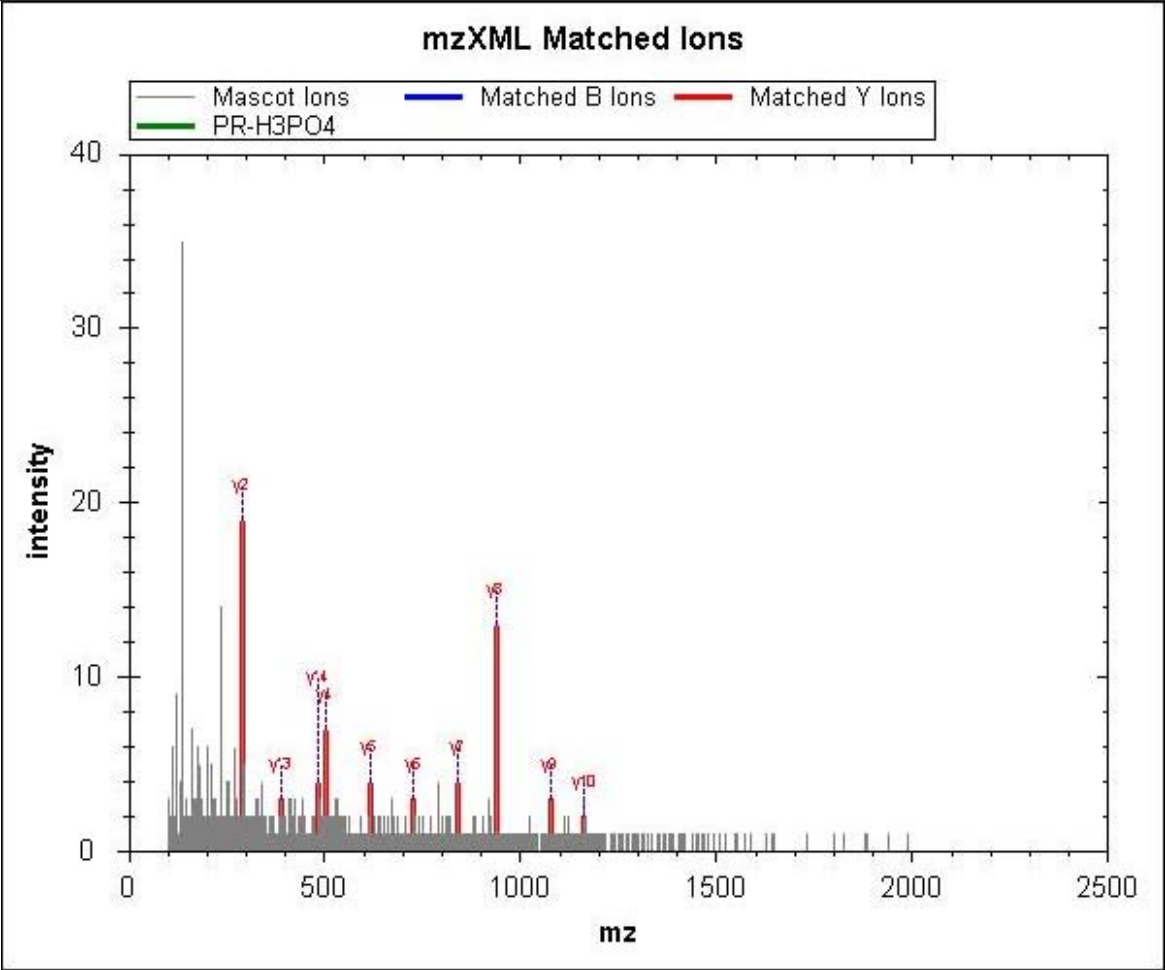

Protein index=1374, ACC No: IPI00025729

Peptide index=6978 MS/MS spectrum

Sequence: TTVLTAALLLSGIPAEVINR, m/z:1026.613, charge:+ 2, Modification: , Mod Position:

Score: 77.62, Raw data:WET\_B4\_090616\_01.mzxml, MS/MS Elution time: 102.7762, Scan number:5789, Mass delta:0.013, Rank:1

| No | b       | b++    | b*      | b*++   | b0      | b0++   | Seq | y       | y++    | y*      | y*++   | y0      | y0++   | RevNo |
|----|---------|--------|---------|--------|---------|--------|-----|---------|--------|---------|--------|---------|--------|-------|
| 1  | 102.05  | 51.53  |         |        | 84.04   | 42.53  | T   |         |        |         |        |         |        | 20    |
| 2  | 203.1   | 102.05 |         |        | 185.09  | 93.05  | T   | 1951.16 | 976.08 | 1934.13 | 967.57 | 1933.15 | 967.08 | 19    |
| 3  | 302.17  | 151.59 |         |        | 284.16  | 142.58 | V   | 1850.11 | 925.56 | 1833.08 | 917.05 | 1832.1  | 916.55 | 18    |
| 4  | 415.26  | 208.13 |         |        | 397.24  | 199.13 | L   | 1751.04 | 876.03 | 1734.02 | 867.51 | 1733.03 | 867.02 | 17    |
| 5  | 516.3   | 258.65 |         |        | 498.29  | 249.65 | T   | 1637.96 | 819.48 | 1620.93 | 810.97 | 1619.95 | 810.48 | 16    |
| 6  | 587.34  | 294.17 |         |        | 569.33  | 285.17 | A   | 1536.91 | 768.96 | 1519.88 | 760.45 | 1518.9  | 759.95 | 15    |
| 7  | 658.38  | 329.69 |         |        | 640.37  | 320.69 | A   | 1465.87 | 733.44 | 1448.85 | 724.93 | 1447.86 | 724.44 | 14    |
| 8  | 771.46  | 386.23 |         |        | 753.45  | 377.23 | L   | 1394.84 | 697.92 | 1377.81 | 689.41 | 1376.83 | 688.92 | 13    |
| 9  | 884.55  | 442.78 |         |        | 866.53  | 433.77 | L   | 1281.75 | 641.38 | 1264.73 | 632.87 | 1263.74 | 632.37 | 12    |
| 10 | 997.63  | 499.32 |         |        | 979.62  | 490.31 | L   | 1168.67 | 584.84 | 1151.64 | 576.32 | 1150.66 | 575.83 | 11    |
| 11 | 1084.66 | 542.83 |         |        | 1066.65 | 533.83 | S   | 1055.58 | 528.3  | 1038.56 | 519.78 | 1037.57 | 519.29 | 10    |
| 12 | 1141.68 | 571.34 |         |        | 1123.67 | 562.34 | G   | 968.55  | 484.78 | 951.53  | 476.27 | 950.54  | 475.77 | 9     |
| 13 | 1254.77 | 627.89 |         |        | 1236.76 | 618.88 | I   | 911.53  | 456.27 | 894.5   | 447.76 | 893.52  | 447.26 | 8     |
| 14 | 1351.82 | 676.41 |         |        | 1333.81 | 667.41 | P   | 798.45  | 399.73 | 781.42  | 391.21 | 780.44  | 390.72 | 7     |
| 15 | 1422.86 | 711.93 |         |        | 1404.85 | 702.93 | A   | 701.39  | 351.2  | 684.37  | 342.69 | 683.38  | 342.2  | 6     |
| 16 | 1551.9  | 776.45 |         |        | 1533.89 | 767.45 | E   | 630.36  | 315.68 | 613.33  | 307.17 | 612.35  | 306.68 | 5     |
| 17 | 1650.97 | 825.99 |         |        | 1632.96 | 816.98 | V   | 501.31  | 251.16 | 484.29  | 242.65 |         |        | 4     |
| 18 | 1764.05 | 882.53 |         |        | 1746.04 | 873.52 | I   | 402.25  | 201.63 | 385.22  | 193.11 |         |        | 3     |
| 19 | 1878.09 | 939.55 | 1861.07 | 931.04 | 1860.08 | 930.55 | N   | 289.16  | 145.08 | 272.14  | 136.57 |         |        | 2     |
| 20 |         |        |         |        |         |        | R   | 175.12  | 88.06  | 158.09  | 79.55  |         |        | 1     |

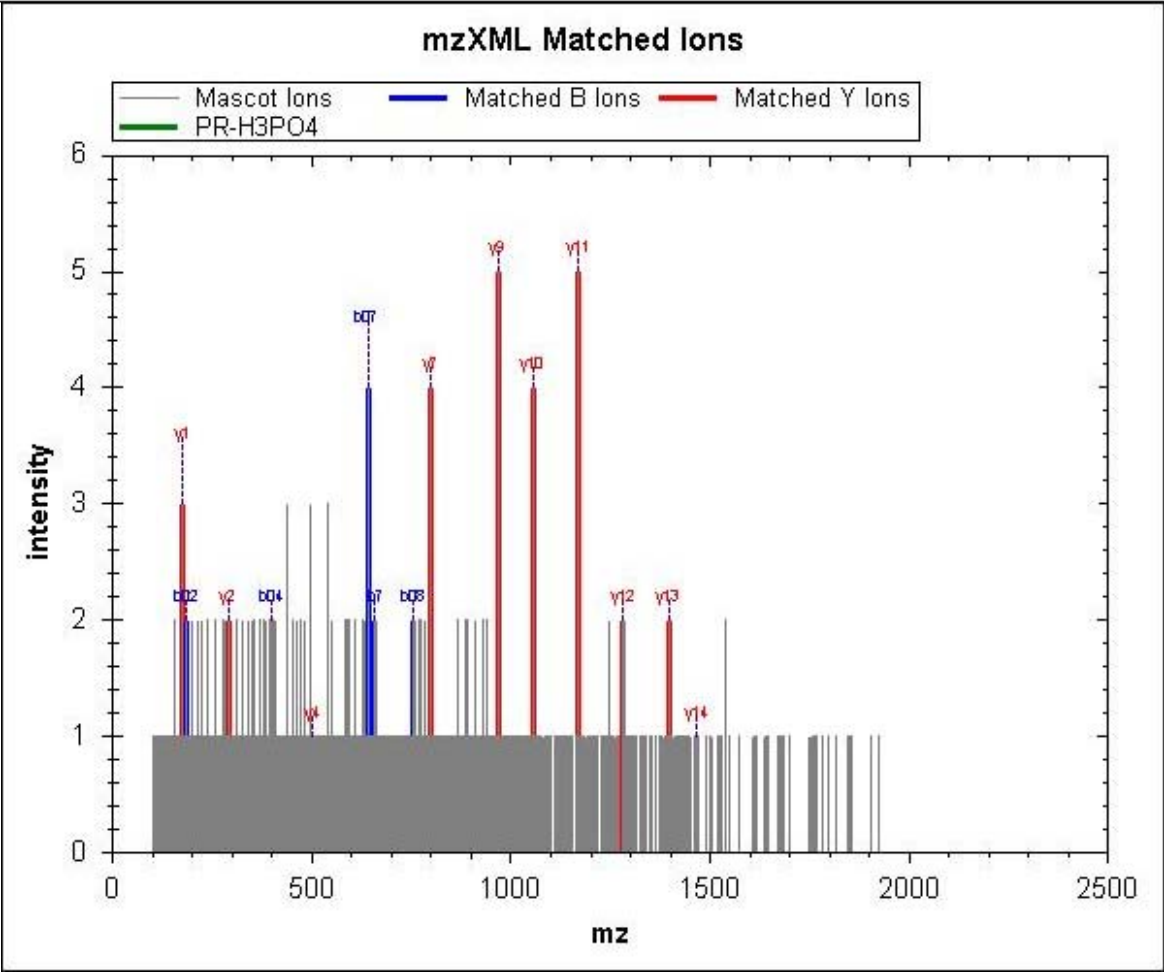

Protein index=1375, ACC No:IPI00305423

Peptide index=1826 MS/MS spectrum

Sequence: ILDETQEAVEYQR, m/z:797.3992, charge:+ 2, Modification: , Mod Position:

Score: 50.76, Raw data:WET\_B4\_090616\_02.mzxml, MS/MS Elution time: 37.98233, Scan number:1976, Mass delta:-0.0011, Rank:1

| No | b       | b++    | b*      | b*++   | b0      | b0++   | Seq | y       | y++    | y*      | y*++   | y0      | y0++   | RevNo |
|----|---------|--------|---------|--------|---------|--------|-----|---------|--------|---------|--------|---------|--------|-------|
| 1  | 114.09  | 57.55  |         |        |         |        | I   |         |        |         |        |         |        | 13    |
| 2  | 227.18  | 114.09 |         |        |         |        | L   | 1480.69 | 740.85 | 1463.67 | 732.34 | 1462.68 | 731.84 | 12    |
| 3  | 342.2   | 171.6  |         |        | 324.19  | 162.6  | D   | 1367.61 | 684.31 | 1350.58 | 675.79 | 1349.6  | 675.3  | 11    |
| 4  | 471.24  | 236.13 |         |        | 453.23  | 227.12 | E   | 1252.58 | 626.79 | 1235.55 | 618.28 | 1234.57 | 617.79 | 10    |
| 5  | 572.29  | 286.65 |         |        | 554.28  | 277.64 | T   | 1123.54 | 562.27 | 1106.51 | 553.76 | 1105.53 | 553.27 | 9     |
| 6  | 700.35  | 350.68 | 683.32  | 342.17 | 682.34  | 341.67 | Q   | 1022.49 | 511.75 | 1005.46 | 503.24 | 1004.48 | 502.74 | 8     |
| 7  | 829.39  | 415.2  | 812.37  | 406.69 | 811.38  | 406.2  | E   | 894.43  | 447.72 | 877.4   | 439.21 | 876.42  | 438.71 | 7     |
| 8  | 900.43  | 450.72 | 883.4   | 442.21 | 882.42  | 441.71 | A   | 765.39  | 383.2  | 748.36  | 374.68 | 747.38  | 374.19 | 6     |
| 9  | 999.5   | 500.25 | 982.47  | 491.74 | 981.49  | 491.25 | V   | 694.35  | 347.68 | 677.33  | 339.17 | 676.34  | 338.67 | 5     |
| 10 | 1128.54 | 564.77 | 1111.52 | 556.26 | 1110.53 | 555.77 | E   | 595.28  | 298.15 | 578.26  | 289.63 | 577.27  | 289.14 | 4     |
| 11 | 1291.61 | 646.31 | 1274.58 | 637.79 | 1273.59 | 637.3  | Y   | 466.24  | 233.62 | 449.21  | 225.11 |         |        | 3     |
| 12 | 1419.66 | 710.34 | 1402.64 | 701.82 | 1401.65 | 701.33 | Q   | 303.18  | 152.09 | 286.15  | 143.58 |         |        | 2     |

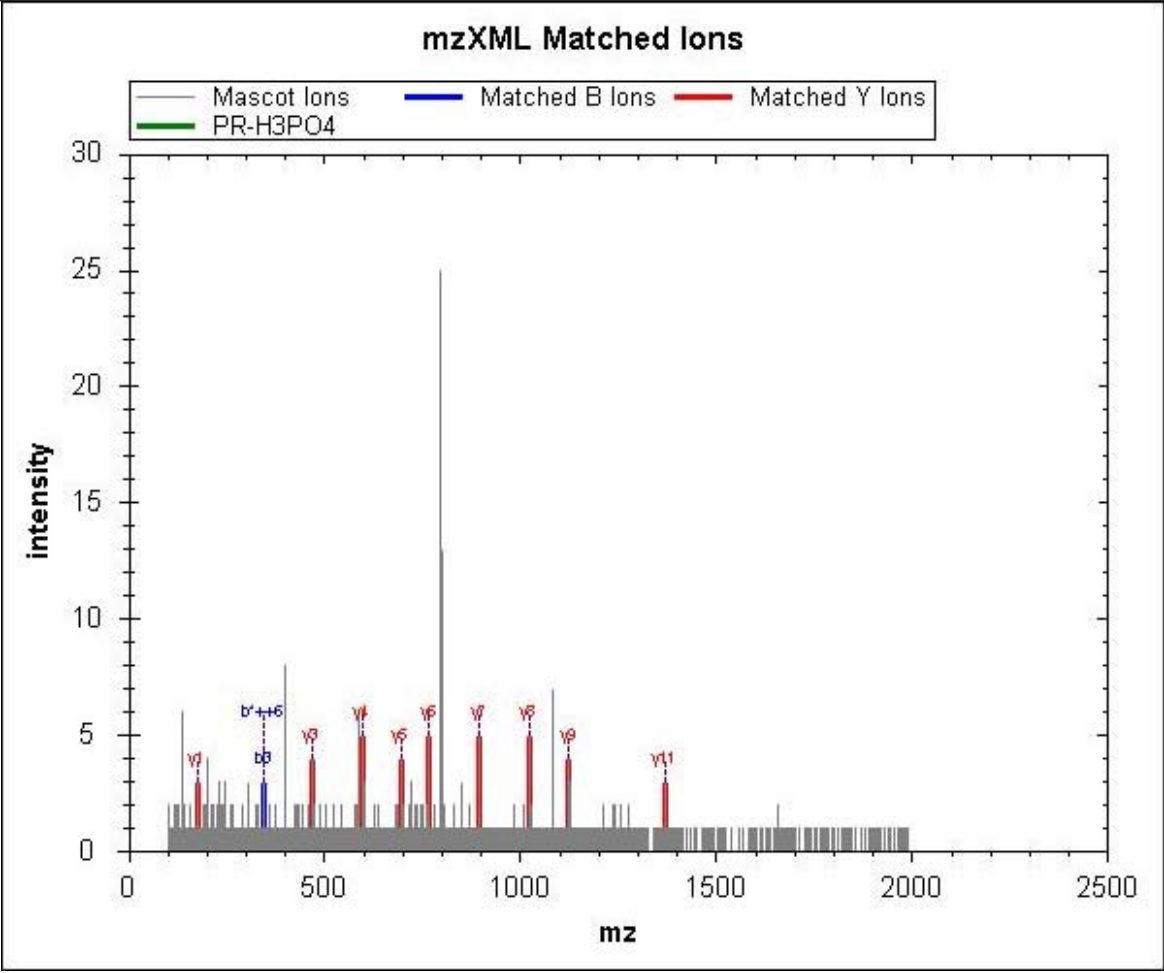

Protein index=1376, ACC No:IPI00333215

Peptide index=4997 MS/MS spectrum

Sequence: NIPMTLELLQSTR, m/z:758.4164, charge:+ 2, Modification: , Mod Position:

Score: 38.12, Raw data:WET\_B4\_090616\_01.mzxml, MS/MS Elution time: 67.98683, Scan number:3743, Mass delta:0.0056, Rank:1

|    |         |        |         |        |        |        |   |        |        |        |        |        |        |   |
|----|---------|--------|---------|--------|--------|--------|---|--------|--------|--------|--------|--------|--------|---|
| 12 | 1341.71 | 671.36 | 1324.68 | 662.84 | 1323.7 | 662.35 | T | 276.17 | 138.59 | 259.14 | 130.07 | 258.16 | 129.58 | 2 |
| 13 |         |        |         |        |        |        | R | 175.12 | 88.06  | 158.09 | 79.55  |        |        | 1 |

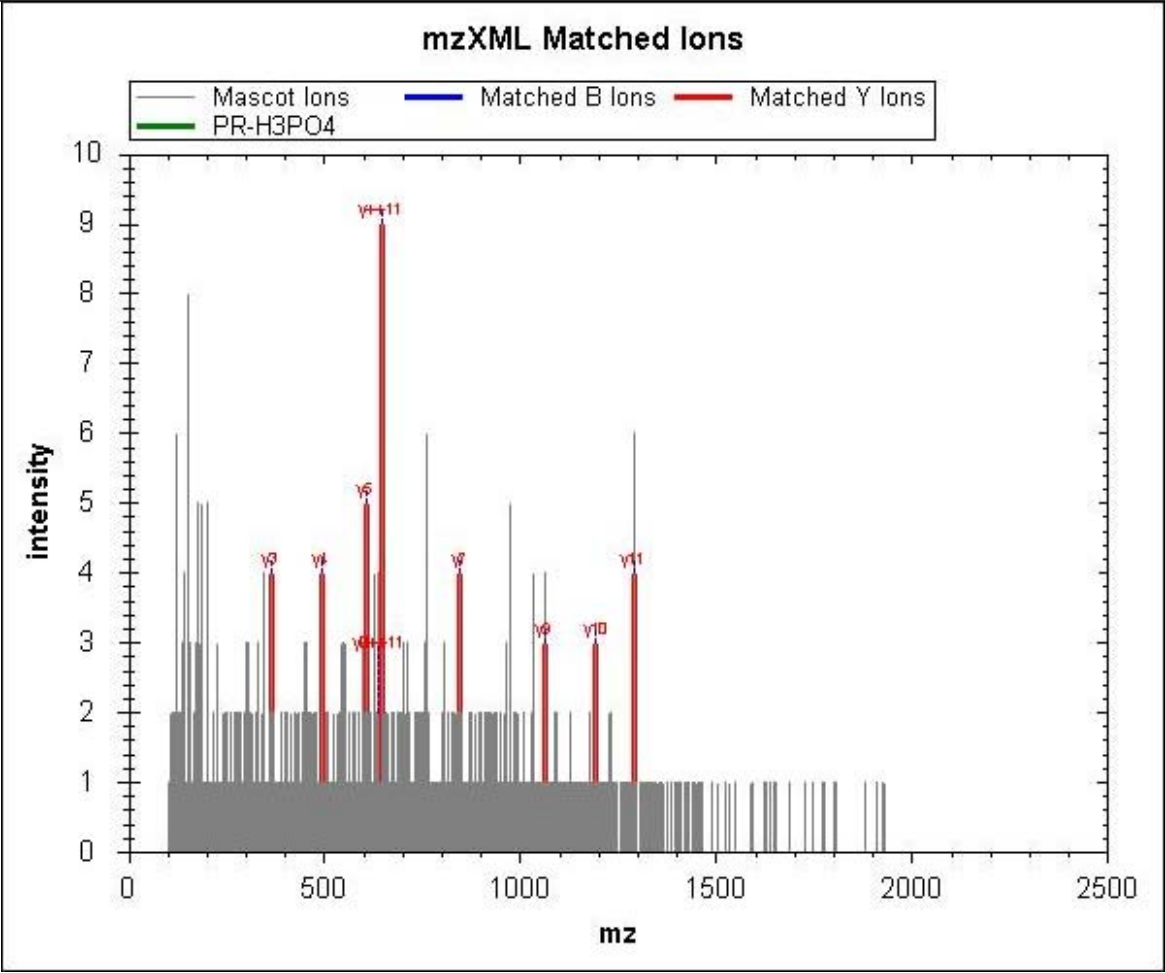

Protein index=1377, ACC No:IPI00027423

Peptide index=4218 MS/MS spectrum

Sequence: LNLDSIIGR, m/z:500.7912, charge:+ 2, Modification: , Mod Position:

Score: 72.56, Raw data:WET\_B4\_090616\_01.mzxml, MS/MS Elution time: 60.2325, Scan number:3289, Mass delta:-0.0035, Rank:1

| No | b      | b++    | b*     | b*++   | b0     | b0++   | Seq | y      | y++    | y*     | y*++   | y0     | y0++   | RevNo |
|----|--------|--------|--------|--------|--------|--------|-----|--------|--------|--------|--------|--------|--------|-------|
| 1  | 114.09 | 57.55  |        |        |        |        | L   |        |        |        |        |        |        | 9     |
| 2  | 228.13 | 114.57 | 211.11 | 106.06 |        |        | N   | 887.49 | 444.25 | 870.47 | 435.74 | 869.48 | 435.25 | 8     |
| 3  | 341.22 | 171.11 | 324.19 | 162.6  |        |        | L   | 773.45 | 387.23 | 756.42 | 378.72 | 755.44 | 378.22 | 7     |
| 4  | 456.25 | 228.63 | 439.22 | 220.11 | 438.23 | 219.62 | D   | 660.37 | 330.69 | 643.34 | 322.17 | 642.36 | 321.68 | 6     |
| 5  | 543.28 | 272.14 | 526.25 | 263.63 | 525.27 | 263.14 | S   | 545.34 | 273.17 | 528.31 | 264.66 | 527.33 | 264.17 | 5     |
| 6  | 656.36 | 328.68 | 639.33 | 320.17 | 638.35 | 319.68 | I   | 458.31 | 229.66 | 441.28 | 221.14 |        |        | 4     |
| 7  | 769.45 | 385.23 | 752.42 | 376.71 | 751.43 | 376.22 | I   | 345.22 | 173.12 | 328.2  | 164.6  |        |        | 3     |
| 8  | 826.47 | 413.74 | 809.44 | 405.22 | 808.46 | 404.73 | G   | 232.14 | 116.57 | 215.11 | 108.06 |        |        | 2     |
| 9  |        |        |        |        |        |        | R   | 175.12 | 88.06  | 158.09 | 79.55  |        |        | 1     |



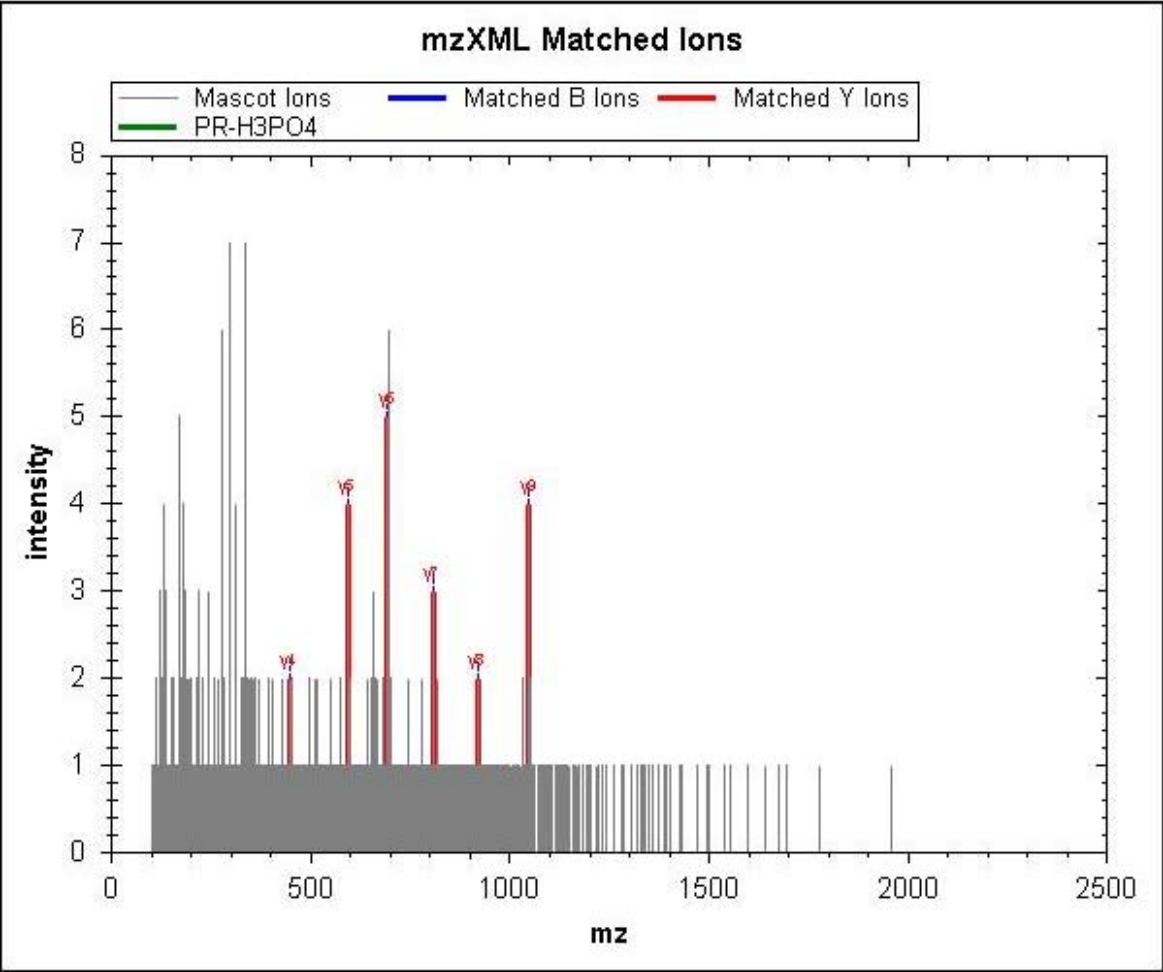

Protein index=1379, ACC No:IPI00032560

Peptide index=2766 MS/MS spectrum

Sequence: LLKDEIVDHWR, m/z:475.2608, charge:+ 3, Modification: , Mod Position:

Score: 66.81, Raw data:WET\_B4\_090616\_01.mzxml, MS/MS Elution time: 46.94717, Scan number:2511, Mass delta:-0.0014, Rank:1

| No | b       | b++    | b*      | b*++   | b0      | b0++   | Seq | y       | y++    | y*      | y*++   | y0      | y0++   | RevNo |
|----|---------|--------|---------|--------|---------|--------|-----|---------|--------|---------|--------|---------|--------|-------|
| 1  | 114.09  | 57.55  |         |        |         |        | L   |         |        |         |        |         |        | 11    |
| 2  | 227.18  | 114.09 |         |        |         |        | L   | 1310.69 | 655.85 | 1293.66 | 647.33 | 1292.67 | 646.84 | 10    |
| 3  | 355.27  | 178.14 | 338.24  | 169.63 |         |        | K   | 1197.6  | 599.3  | 1180.57 | 590.79 | 1179.59 | 590.3  | 9     |
| 4  | 470.3   | 235.65 | 453.27  | 227.14 | 452.29  | 226.65 | D   | 1069.51 | 535.26 | 1052.48 | 526.74 | 1051.5  | 526.25 | 8     |
| 5  | 599.34  | 300.17 | 582.31  | 291.66 | 581.33  | 291.17 | E   | 954.48  | 477.74 | 937.45  | 469.23 | 936.47  | 468.74 | 7     |
| 6  | 712.42  | 356.72 | 695.4   | 348.2  | 694.41  | 347.71 | I   | 825.44  | 413.22 | 808.41  | 404.71 | 807.43  | 404.22 | 6     |
| 7  | 811.49  | 406.25 | 794.47  | 397.74 | 793.48  | 397.24 | V   | 712.35  | 356.68 | 695.33  | 348.17 | 694.34  | 347.67 | 5     |
| 8  | 926.52  | 463.76 | 909.49  | 455.25 | 908.51  | 454.76 | D   | 613.28  | 307.15 | 596.26  | 298.63 | 595.27  | 298.14 | 4     |
| 9  | 1063.58 | 532.29 | 1046.55 | 523.78 | 1045.57 | 523.29 | H   | 498.26  | 249.63 | 481.23  | 241.12 |         |        | 3     |
| 10 | 1249.66 | 625.33 | 1232.63 | 616.82 | 1231.65 | 616.33 | W   | 361.2   | 181.1  | 344.17  | 172.59 |         |        | 2     |
| 11 |         |        |         |        |         |        | R   | 175.12  | 88.06  | 158.09  | 79.55  |         |        | 1     |





|    |  |  |  |  |   |        |       |        |       |  |  |   |
|----|--|--|--|--|---|--------|-------|--------|-------|--|--|---|
| 13 |  |  |  |  | R | 175.12 | 88.06 | 158.09 | 79.55 |  |  | 1 |
|----|--|--|--|--|---|--------|-------|--------|-------|--|--|---|

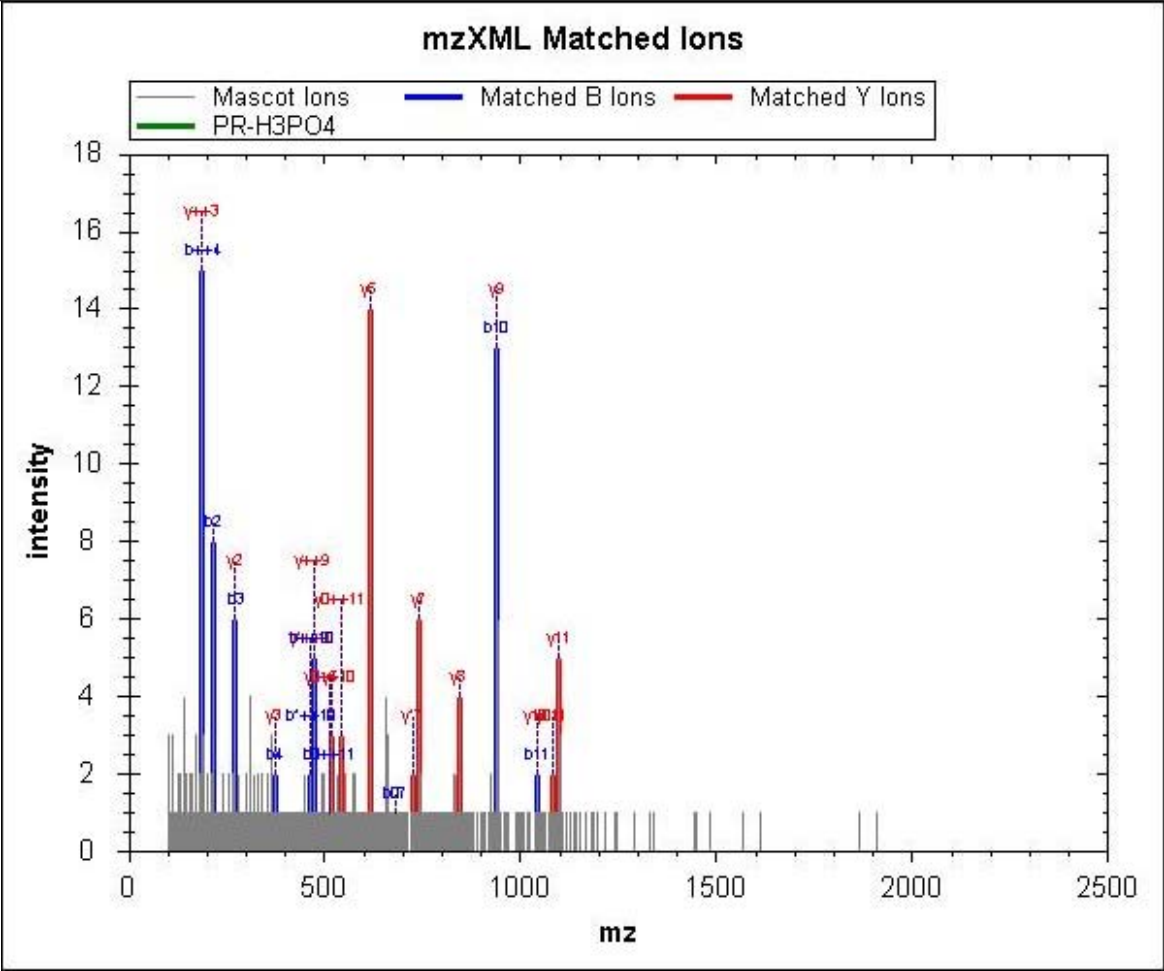

Protein index=1384, ACC No: IPI00178083

Peptide index=1159 MS/MS spectrum

Sequence: EQAEAEVASLNR, m/z:658.8242, charge:+ 2, Modification: , Mod Position:

Score: 32.37, Raw data:WET\_B4\_090616\_01.mzxml, MS/MS Elution time: 30.12933, Scan number:1526, Mass delta:-0.0029, Rank:1

| No | b       | b++    | b*      | b*++   | b0      | b0++   | Seq | y       | y++    | y*      | y*++   | y0      | y0++   | RevNo |
|----|---------|--------|---------|--------|---------|--------|-----|---------|--------|---------|--------|---------|--------|-------|
| 1  | 130.05  | 65.53  |         |        | 112.04  | 56.52  | E   |         |        |         |        |         |        | 12    |
| 2  | 258.11  | 129.56 | 241.08  | 121.04 | 240.1   | 120.55 | Q   | 1187.6  | 594.3  | 1170.58 | 585.79 | 1169.59 | 585.3  | 11    |
| 3  | 329.15  | 165.08 | 312.12  | 156.56 | 311.13  | 156.07 | A   | 1059.54 | 530.28 | 1042.52 | 521.76 | 1041.53 | 521.27 | 10    |
| 4  | 458.19  | 229.6  | 441.16  | 221.08 | 440.18  | 220.59 | E   | 988.51  | 494.76 | 971.48  | 486.24 | 970.5   | 485.75 | 9     |
| 5  | 529.23  | 265.12 | 512.2   | 256.6  | 511.21  | 256.11 | A   | 859.46  | 430.24 | 842.44  | 421.72 | 841.45  | 421.23 | 8     |
| 6  | 658.27  | 329.64 | 641.24  | 321.12 | 640.26  | 320.63 | E   | 788.43  | 394.72 | 771.4   | 386.2  | 770.42  | 385.71 | 7     |
| 7  | 757.34  | 379.17 | 740.31  | 370.66 | 739.33  | 370.17 | V   | 659.38  | 330.2  | 642.36  | 321.68 | 641.37  | 321.19 | 6     |
| 8  | 828.37  | 414.69 | 811.35  | 406.18 | 810.36  | 405.69 | A   | 560.32  | 280.66 | 543.29  | 272.15 | 542.3   | 271.66 | 5     |
| 9  | 915.41  | 458.21 | 898.38  | 449.69 | 897.39  | 449.2  | S   | 489.28  | 245.14 | 472.25  | 236.63 | 471.27  | 236.14 | 4     |
| 10 | 1028.49 | 514.75 | 1011.46 | 506.24 | 1010.48 | 505.74 | L   | 402.25  | 201.63 | 385.22  | 193.11 |         |        | 3     |
| 11 | 1142.53 | 571.77 | 1125.51 | 563.26 | 1124.52 | 562.76 | N   | 289.16  | 145.08 | 272.14  | 136.57 |         |        | 2     |

|    |  |  |  |  |  |   |        |       |        |       |  |  |   |
|----|--|--|--|--|--|---|--------|-------|--------|-------|--|--|---|
| 12 |  |  |  |  |  | R | 175.12 | 88.06 | 158.09 | 79.55 |  |  | 1 |
|----|--|--|--|--|--|---|--------|-------|--------|-------|--|--|---|

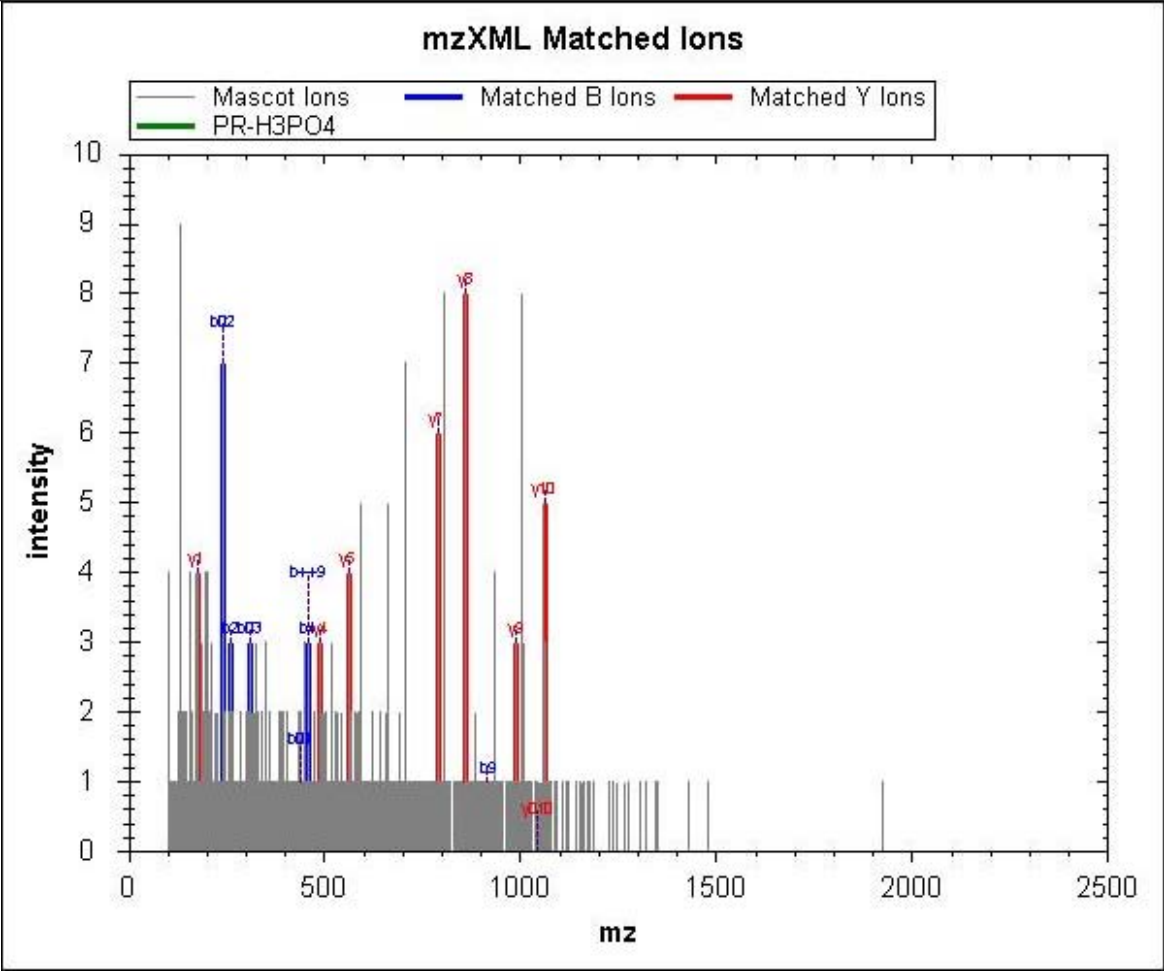

Protein index=1385, ACC No:IP100019733

Peptide index=363 MS/MS spectrum

Sequence: GHEFYNPQK, m/z:560.2663, charge:+ 2, Modification: , Mod Position:

Score: 34.12, Raw data:WET\_B4\_090616\_01.mzxml, MS/MS Elution time: 18.65017, Scan number:856, Mass delta:0.0035, Rank:1

| No | b      | b++    | b*     | b*++   | b0     | b0++   | Seq | y      | y++    | y*      | y*++   | y0      | y0++   | RevNo |
|----|--------|--------|--------|--------|--------|--------|-----|--------|--------|---------|--------|---------|--------|-------|
| 1  | 58.03  | 29.52  |        |        |        |        | G   |        |        |         |        |         |        | 9     |
| 2  | 195.09 | 98.05  |        |        |        |        | H   | 1062.5 | 531.75 | 1045.47 | 523.24 | 1044.49 | 522.75 | 8     |
| 3  | 324.13 | 162.57 |        |        | 306.12 | 153.56 | E   | 925.44 | 463.22 | 908.41  | 454.71 | 907.43  | 454.22 | 7     |
| 4  | 471.2  | 236.1  |        |        | 453.19 | 227.1  | F   | 796.4  | 398.7  | 779.37  | 390.19 |         |        | 6     |
| 5  | 634.26 | 317.63 |        |        | 616.25 | 308.63 | Y   | 649.33 | 325.17 | 632.3   | 316.66 |         |        | 5     |
| 6  | 748.3  | 374.66 | 731.28 | 366.14 | 730.29 | 365.65 | N   | 486.27 | 243.64 | 469.24  | 235.12 |         |        | 4     |
| 7  | 845.36 | 423.18 | 828.33 | 414.67 | 827.35 | 414.18 | P   | 372.22 | 186.62 | 355.2   | 178.1  |         |        | 3     |
| 8  | 973.42 | 487.21 | 956.39 | 478.7  | 955.41 | 478.21 | Q   | 275.17 | 138.09 | 258.14  | 129.58 |         |        | 2     |
| 9  |        |        |        |        |        |        | K   | 147.11 | 74.06  | 130.09  | 65.55  |         |        | 1     |

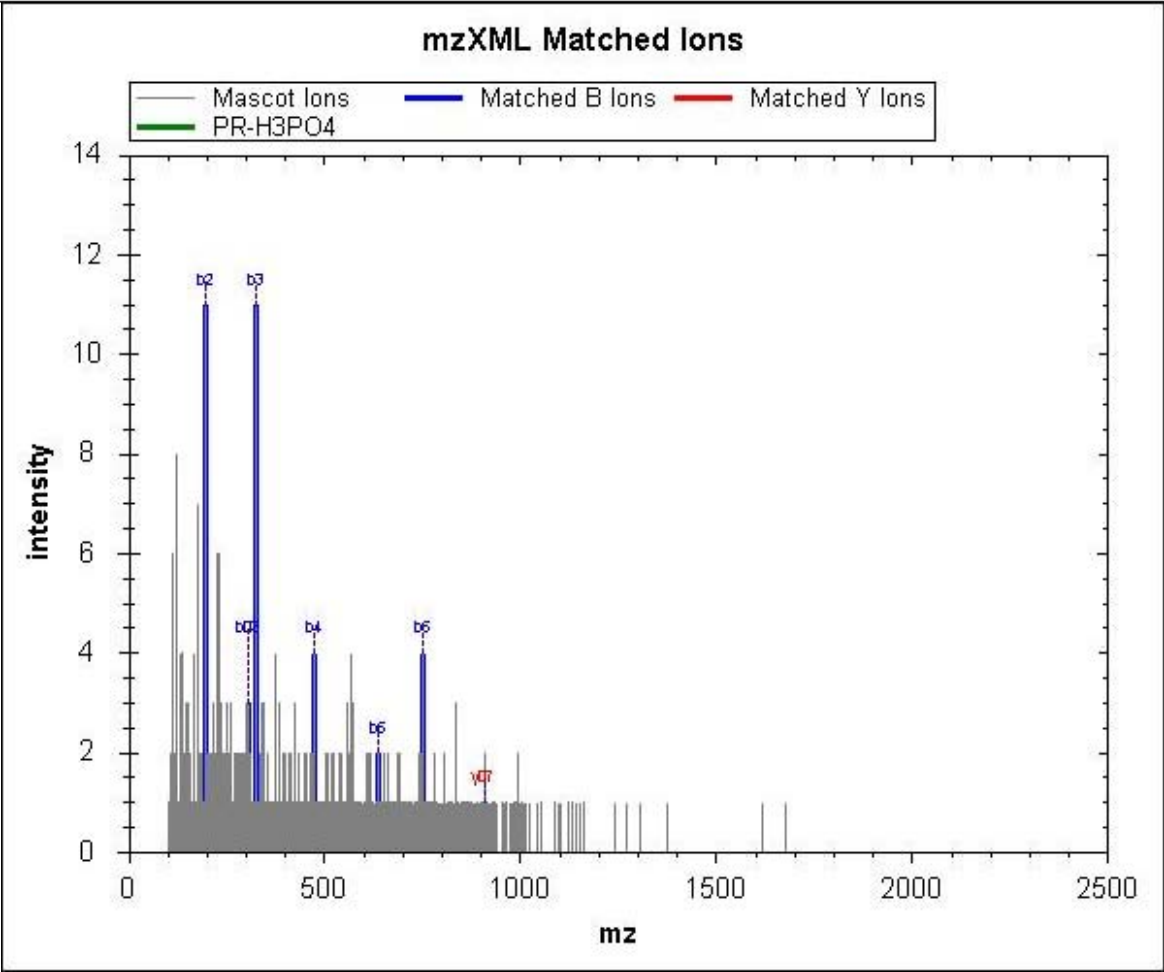

Protein index=1386, ACC No:IPI00176642

Peptide index=5093 MS/MS spectrum

Sequence: IYLILEYAPR, m/z:625.8675, charge:+ 2, Modification: , Mod Position:

Score: 58.49, Raw data:WET\_B4\_090616\_03.mzxml, MS/MS Elution time: 69.354, Scan number:3822, Mass delta:0.0013, Rank:1

| No | b      | b++    | b0      | b0++   | Seq | y       | y++    | y*     | y*++   | y0      | y0++   | RevNo |
|----|--------|--------|---------|--------|-----|---------|--------|--------|--------|---------|--------|-------|
| 1  | 114.09 | 57.55  |         |        | I   |         |        |        |        |         |        | 10    |
| 2  | 277.15 | 139.08 |         |        | Y   | 1137.63 | 569.32 | 1120.6 | 560.81 | 1119.62 | 560.31 | 9     |
| 3  | 390.24 | 195.62 |         |        | L   | 974.57  | 487.79 | 957.54 | 479.27 | 956.56  | 478.78 | 8     |
| 4  | 503.32 | 252.17 |         |        | I   | 861.48  | 431.25 | 844.46 | 422.73 | 843.47  | 422.24 | 7     |
| 5  | 616.41 | 308.71 |         |        | L   | 748.4   | 374.7  | 731.37 | 366.19 | 730.39  | 365.7  | 6     |
| 6  | 745.45 | 373.23 | 727.44  | 364.22 | E   | 635.31  | 318.16 | 618.29 | 309.65 | 617.3   | 309.16 | 5     |
| 7  | 908.51 | 454.76 | 890.5   | 445.75 | Y   | 506.27  | 253.64 | 489.25 | 245.13 |         |        | 4     |
| 8  | 979.55 | 490.28 | 961.54  | 481.27 | A   | 343.21  | 172.11 | 326.18 | 163.59 |         |        | 3     |
| 9  | 1076.6 | 538.8  | 1058.59 | 529.8  | P   | 272.17  | 136.59 | 255.15 | 128.08 |         |        | 2     |
| 10 |        |        |         |        | R   | 175.12  | 88.06  | 158.09 | 79.55  |         |        | 1     |

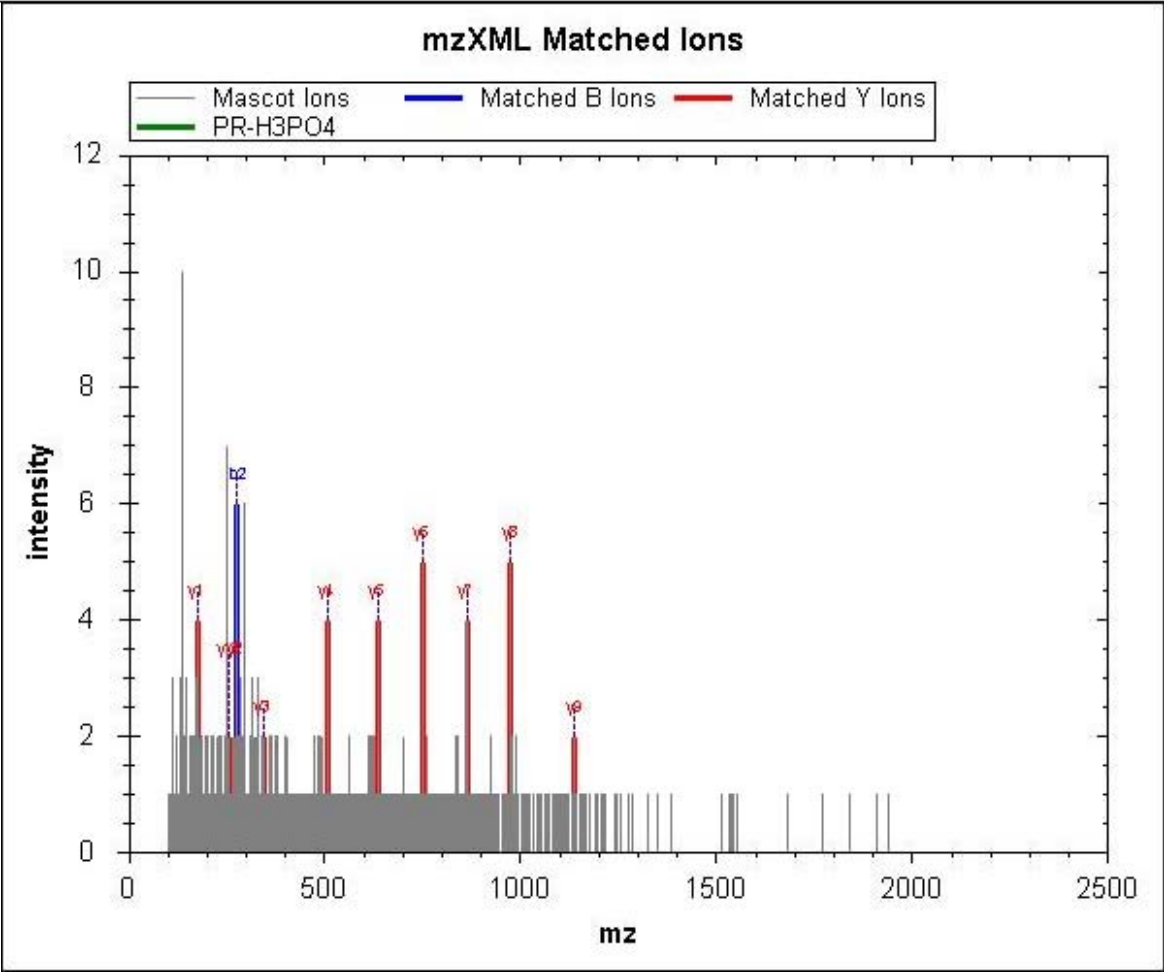

Protein index=1387, ACC No: IPI00455033

Peptide index=6639 MS/MS spectrum

Sequence: APVDFGYVGIDSILEQMR, m/z:1005.523, charge:+ 2, Modification: , Mod Position:

Score: 61.15, Raw data:WET\_B4\_090616\_01.mzxml, MS/MS Elution time: 92.88634, Scan number:5201, Mass delta:0.0396, Rank:1

| No | b       | b++    | b* | b*++ | b0      | b0++   | Seq | y       | y++    | y*      | y*++   | y0      | y0++   | RevNo |
|----|---------|--------|----|------|---------|--------|-----|---------|--------|---------|--------|---------|--------|-------|
| 1  | 72.04   | 36.53  |    |      |         |        | A   |         |        |         |        |         |        | 18    |
| 2  | 169.1   | 85.05  |    |      |         |        | P   | 1938.96 | 969.99 | 1921.94 | 961.47 | 1920.95 | 960.98 | 17    |
| 3  | 268.17  | 134.59 |    |      |         |        | V   | 1841.91 | 921.46 | 1824.88 | 912.95 | 1823.9  | 912.45 | 16    |
| 4  | 383.19  | 192.1  |    |      | 365.18  | 183.09 | D   | 1742.84 | 871.92 | 1725.82 | 863.41 | 1724.83 | 862.92 | 15    |
| 5  | 530.26  | 265.63 |    |      | 512.25  | 256.63 | F   | 1627.81 | 814.41 | 1610.79 | 805.9  | 1609.8  | 805.41 | 14    |
| 6  | 587.28  | 294.14 |    |      | 569.27  | 285.14 | G   | 1480.75 | 740.88 | 1463.72 | 732.36 | 1462.74 | 731.87 | 13    |
| 7  | 750.35  | 375.68 |    |      | 732.34  | 366.67 | Y   | 1423.72 | 712.37 | 1406.7  | 703.85 | 1405.71 | 703.36 | 12    |
| 8  | 849.41  | 425.21 |    |      | 831.4   | 416.21 | V   | 1260.66 | 630.83 | 1243.64 | 622.32 | 1242.65 | 621.83 | 11    |
| 9  | 906.44  | 453.72 |    |      | 888.43  | 444.72 | G   | 1161.59 | 581.3  | 1144.57 | 572.79 | 1143.58 | 572.29 | 10    |
| 10 | 1019.52 | 510.26 |    |      | 1001.51 | 501.26 | I   | 1104.57 | 552.79 | 1087.55 | 544.28 | 1086.56 | 543.78 | 9     |
| 11 | 1134.55 | 567.78 |    |      | 1116.54 | 558.77 | D   | 991.49  | 496.25 | 974.46  | 487.73 | 973.48  | 487.24 | 8     |
| 12 | 1221.58 | 611.29 |    |      | 1203.57 | 602.29 | S   | 876.46  | 438.73 | 859.43  | 430.22 | 858.45  | 429.73 | 7     |

|    |         |        |         |        |         |        |   |        |        |        |        |        |        |   |
|----|---------|--------|---------|--------|---------|--------|---|--------|--------|--------|--------|--------|--------|---|
| 13 | 1334.66 | 667.84 |         |        | 1316.65 | 658.83 | I | 789.43 | 395.22 | 772.4  | 386.7  | 771.42 | 386.21 | 6 |
| 14 | 1447.75 | 724.38 |         |        | 1429.74 | 715.37 | L | 676.34 | 338.68 | 659.32 | 330.16 | 658.33 | 329.67 | 5 |
| 15 | 1576.79 | 788.9  |         |        | 1558.78 | 779.89 | E | 563.26 | 282.13 | 546.23 | 273.62 | 545.25 | 273.13 | 4 |
| 16 | 1704.85 | 852.93 | 1687.82 | 844.41 | 1686.84 | 843.92 | Q | 434.22 | 217.61 | 417.19 | 209.1  |        |        | 3 |
| 17 | 1835.89 | 918.45 | 1818.86 | 909.93 | 1817.88 | 909.44 | M | 306.16 | 153.58 | 289.13 | 145.07 |        |        | 2 |
| 18 |         |        |         |        |         |        | R | 175.12 | 88.06  | 158.09 | 79.55  |        |        | 1 |

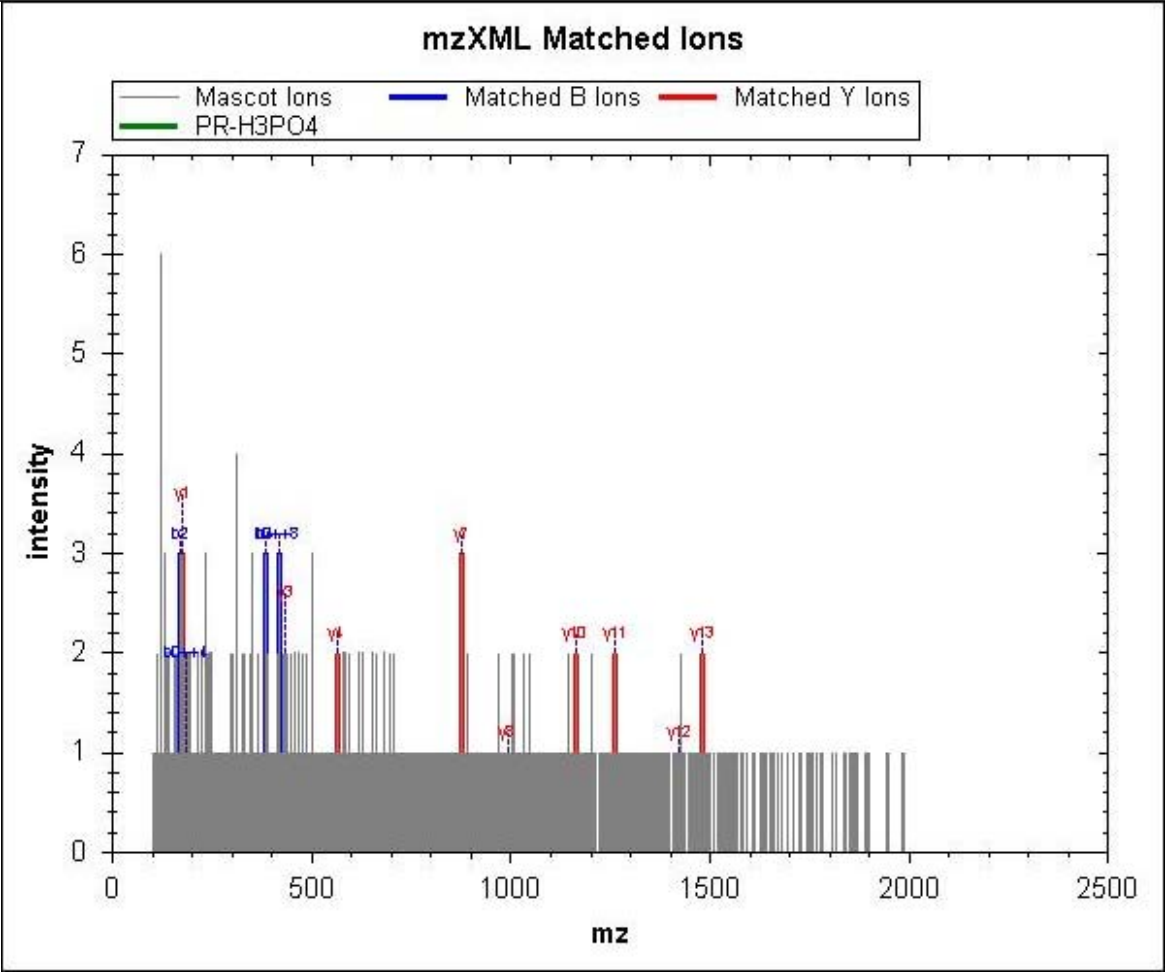

|    |         |        |         |        |         |        |   |         |        |         |        |         |        |    |
|----|---------|--------|---------|--------|---------|--------|---|---------|--------|---------|--------|---------|--------|----|
| 7  | 648.41  | 324.71 |         |        |         |        | P | 1486.8  | 743.9  | 1469.77 | 735.39 | 1468.79 | 734.9  | 13 |
| 8  | 761.49  | 381.25 |         |        |         |        | L | 1389.75 | 695.38 | 1372.72 | 686.86 | 1371.74 | 686.37 | 12 |
| 9  | 818.51  | 409.76 |         |        |         |        | G | 1276.66 | 638.84 | 1259.64 | 630.32 | 1258.65 | 629.83 | 11 |
| 10 | 946.57  | 473.79 | 929.55  | 465.28 |         |        | Q | 1219.64 | 610.33 | 1202.62 | 601.81 | 1201.63 | 601.32 | 10 |
| 11 | 1047.62 | 524.31 | 1030.59 | 515.8  | 1029.61 | 515.31 | T | 1091.58 | 546.3  | 1074.56 | 537.78 | 1073.57 | 537.29 | 9  |
| 12 | 1176.66 | 588.83 | 1159.64 | 580.32 | 1158.65 | 579.83 | E | 990.54  | 495.77 | 973.51  | 487.26 | 972.53  | 486.77 | 8  |
| 13 | 1275.73 | 638.37 | 1258.7  | 629.86 | 1257.72 | 629.36 | V | 861.49  | 431.25 | 844.47  | 422.74 |         |        | 7  |
| 14 | 1422.8  | 711.9  | 1405.77 | 703.39 | 1404.79 | 702.9  | F | 762.43  | 381.72 | 745.4   | 373.2  |         |        | 6  |
| 15 | 1550.86 | 775.93 | 1533.83 | 767.42 | 1532.85 | 766.93 | Q | 615.36  | 308.18 | 598.33  | 299.67 |         |        | 5  |
| 16 | 1621.89 | 811.45 | 1604.87 | 802.94 | 1603.88 | 802.45 | A | 487.3   | 244.15 | 470.27  | 235.64 |         |        | 4  |
| 17 | 1734.98 | 867.99 | 1717.95 | 859.48 | 1716.97 | 858.99 | L | 416.26  | 208.63 | 399.24  | 200.12 |         |        | 3  |
| 18 | 1863.04 | 932.02 | 1846.01 | 923.51 | 1845.03 | 923.02 | Q | 303.18  | 152.09 | 286.15  | 143.58 |         |        | 2  |
| 19 |         |        |         |        |         |        | R | 175.12  | 88.06  | 158.09  | 79.55  |         |        | 1  |

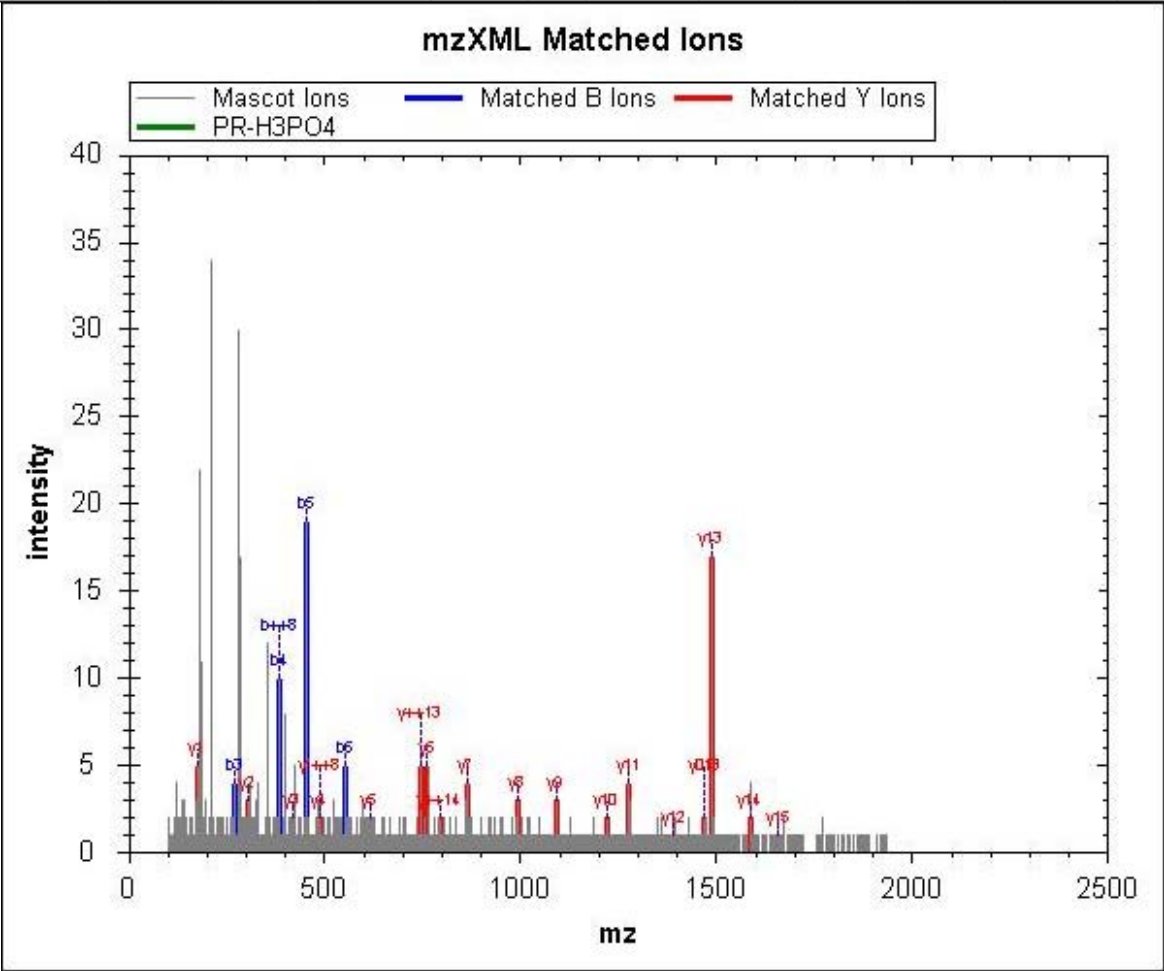

| No | b       | b++    | b*      | b*++   | b0      | b0++   | Seq | y       | y++    | y*      | y*++   | y0      | y0++   | RevNo |
|----|---------|--------|---------|--------|---------|--------|-----|---------|--------|---------|--------|---------|--------|-------|
| 1  | 102.05  | 51.53  |         |        | 84.04   | 42.53  | T   |         |        |         |        |         |        | 13    |
| 2  | 201.12  | 101.07 |         |        | 183.11  | 92.06  | V   | 1157.66 | 579.34 | 1140.64 | 570.82 | 1139.65 | 570.33 | 12    |
| 3  | 314.21  | 157.61 |         |        | 296.2   | 148.6  | L   | 1058.6  | 529.8  | 1041.57 | 521.29 | 1040.58 | 520.8  | 11    |
| 4  | 427.29  | 214.15 |         |        | 409.28  | 205.14 | I   | 945.51  | 473.26 | 928.48  | 464.75 | 927.5   | 464.25 | 10    |
| 5  | 528.34  | 264.67 |         |        | 510.33  | 255.67 | T   | 832.43  | 416.72 | 815.4   | 408.2  | 814.42  | 407.71 | 9     |
| 6  | 585.36  | 293.18 |         |        | 567.35  | 284.18 | G   | 731.38  | 366.19 | 714.35  | 357.68 | 713.37  | 357.19 | 8     |
| 7  | 656.4   | 328.7  |         |        | 638.39  | 319.7  | A   | 674.36  | 337.68 | 657.33  | 329.17 | 656.35  | 328.68 | 7     |
| 8  | 770.44  | 385.72 | 753.41  | 377.21 | 752.43  | 376.72 | N   | 603.32  | 302.16 | 586.29  | 293.65 | 585.31  | 293.16 | 6     |
| 9  | 857.47  | 429.24 | 840.45  | 420.73 | 839.46  | 420.23 | S   | 489.28  | 245.14 | 472.25  | 236.63 | 471.27  | 236.14 | 5     |
| 10 | 914.49  | 457.75 | 897.47  | 449.24 | 896.48  | 448.75 | G   | 402.25  | 201.63 | 385.22  | 193.11 |         |        | 4     |
| 11 | 1027.58 | 514.29 | 1010.55 | 505.78 | 1009.57 | 505.29 | L   | 345.22  | 173.12 | 328.2   | 164.6  |         |        | 3     |
| 12 | 1084.6  | 542.8  | 1067.57 | 534.29 | 1066.59 | 533.8  | G   | 232.14  | 116.57 | 215.11  | 108.06 |         |        | 2     |
| 13 |         |        |         |        |         |        | R   | 175.12  | 88.06  | 158.09  | 79.55  |         |        | 1     |

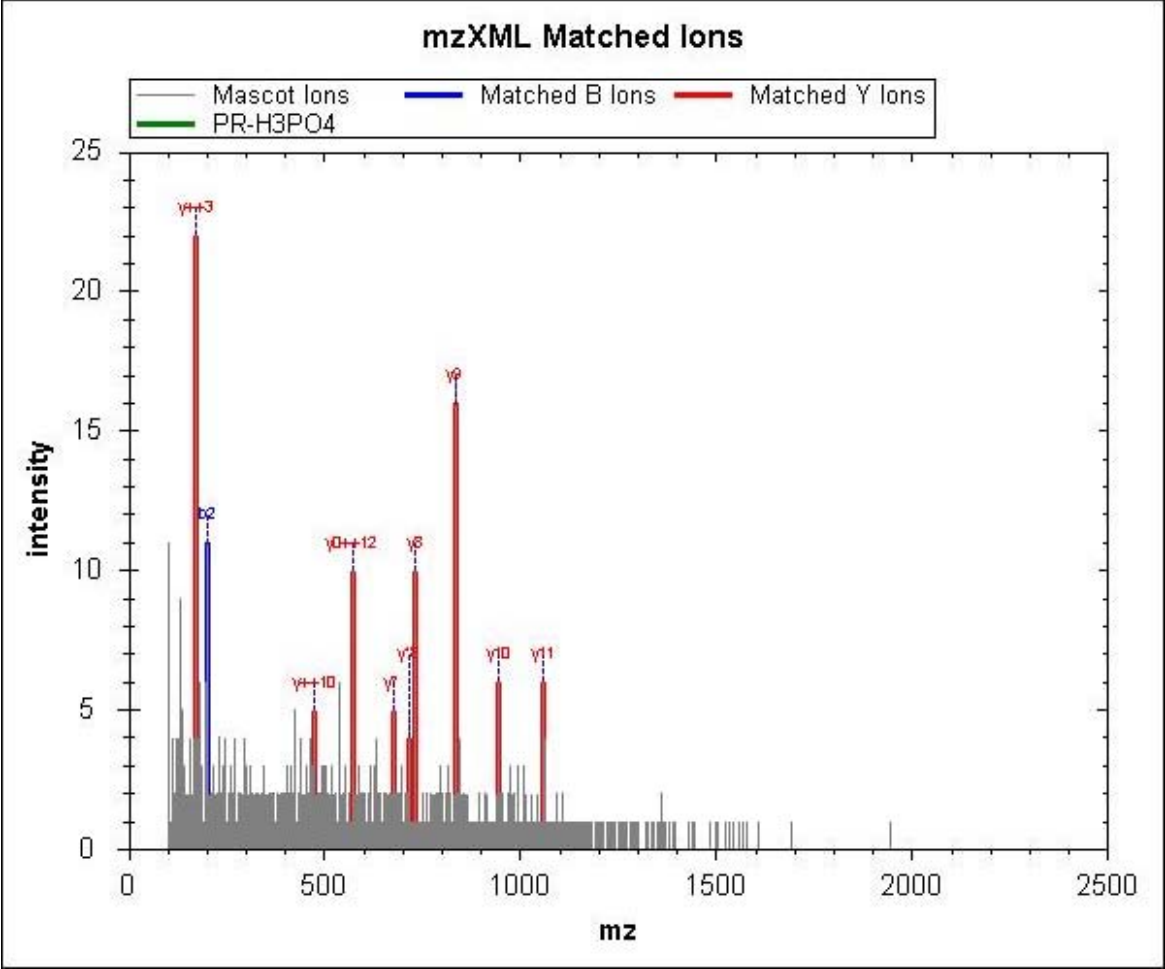

Protein index=1391, ACC No:IP100300886

Peptide index=6799 MS/MS spectrum

Sequence: YENLIAGVSGGVLSNLALHPLDLVK, m/z:864.8218, charge:+ 3, Modification: , Mod Position:

Score: 38.93, Raw data:WET\_B4\_090616\_03.mzxml, MS/MS Elution time: 96.39633, Scan number:5406,

Mass delta:0.0029, Rank:1

| No | b       | b++     | b*      | b*++    | b0      | b0++    | Seq | y       | y++     | y*      | y*++    | y0      | y0++    | RevNo |
|----|---------|---------|---------|---------|---------|---------|-----|---------|---------|---------|---------|---------|---------|-------|
| 1  | 164.07  | 82.54   |         |         |         |         | Y   |         |         |         |         |         |         | 25    |
| 2  | 293.11  | 147.06  |         |         | 275.1   | 138.05  | E   | 2429.38 | 1215.19 | 2412.35 | 1206.68 | 2411.37 | 1206.19 | 24    |
| 3  | 407.16  | 204.08  | 390.13  | 195.57  | 389.15  | 195.08  | N   | 2300.33 | 1150.67 | 2283.31 | 1142.16 | 2282.32 | 1141.67 | 23    |
| 4  | 520.24  | 260.62  | 503.21  | 252.11  | 502.23  | 251.62  | L   | 2186.29 | 1093.65 | 2169.26 | 1085.14 | 2168.28 | 1084.64 | 22    |
| 5  | 633.32  | 317.17  | 616.3   | 308.65  | 615.31  | 308.16  | I   | 2073.21 | 1037.11 | 2056.18 | 1028.59 | 2055.2  | 1028.1  | 21    |
| 6  | 704.36  | 352.68  | 687.33  | 344.17  | 686.35  | 343.68  | A   | 1960.12 | 980.56  | 1943.1  | 972.05  | 1942.11 | 971.56  | 20    |
| 7  | 761.38  | 381.2   | 744.36  | 372.68  | 743.37  | 372.19  | G   | 1889.09 | 945.05  | 1872.06 | 936.53  | 1871.07 | 936.04  | 19    |
| 8  | 860.45  | 430.73  | 843.42  | 422.22  | 842.44  | 421.72  | V   | 1832.06 | 916.54  | 1815.04 | 908.02  | 1814.05 | 907.53  | 18    |
| 9  | 947.48  | 474.25  | 930.46  | 465.73  | 929.47  | 465.24  | S   | 1733    | 867     | 1715.97 | 858.49  | 1714.98 | 858     | 17    |
| 10 | 1004.5  | 502.76  | 987.48  | 494.24  | 986.49  | 493.75  | G   | 1645.96 | 823.49  | 1628.94 | 814.97  | 1627.95 | 814.48  | 16    |
| 11 | 1061.53 | 531.27  | 1044.5  | 522.75  | 1043.52 | 522.26  | G   | 1588.94 | 794.97  | 1571.92 | 786.46  | 1570.93 | 785.97  | 15    |
| 12 | 1160.59 | 580.8   | 1143.57 | 572.29  | 1142.58 | 571.8   | V   | 1531.92 | 766.46  | 1514.89 | 757.95  | 1513.91 | 757.46  | 14    |
| 13 | 1273.68 | 637.34  | 1256.65 | 628.83  | 1255.67 | 628.34  | L   | 1432.85 | 716.93  | 1415.83 | 708.42  | 1414.84 | 707.92  | 13    |
| 14 | 1360.71 | 680.86  | 1343.68 | 672.35  | 1342.7  | 671.85  | S   | 1319.77 | 660.39  | 1302.74 | 651.87  | 1301.76 | 651.38  | 12    |
| 15 | 1474.75 | 737.88  | 1457.73 | 729.37  | 1456.74 | 728.88  | N   | 1232.74 | 616.87  | 1215.71 | 608.36  | 1214.73 | 607.87  | 11    |
| 16 | 1587.84 | 794.42  | 1570.81 | 785.91  | 1569.83 | 785.42  | L   | 1118.69 | 559.85  | 1101.67 | 551.34  | 1100.68 | 550.84  | 10    |
| 17 | 1658.87 | 829.94  | 1641.85 | 821.43  | 1640.86 | 820.94  | A   | 1005.61 | 503.31  | 988.58  | 494.79  | 987.6   | 494.3   | 9     |
| 18 | 1771.96 | 886.48  | 1754.93 | 877.97  | 1753.95 | 877.48  | L   | 934.57  | 467.79  | 917.55  | 459.28  | 916.56  | 458.78  | 8     |
| 19 | 1909.02 | 955.01  | 1891.99 | 946.5   | 1891.01 | 946.01  | H   | 821.49  | 411.25  | 804.46  | 402.73  | 803.48  | 402.24  | 7     |
| 20 | 2006.07 | 1003.54 | 1989.04 | 995.03  | 1988.06 | 994.53  | P   | 684.43  | 342.72  | 667.4   | 334.2   | 666.42  | 333.71  | 6     |
| 21 | 2119.15 | 1060.08 | 2102.13 | 1051.57 | 2101.14 | 1051.08 | L   | 587.38  | 294.19  | 570.35  | 285.68  | 569.37  | 285.19  | 5     |
| 22 | 2234.18 | 1117.59 | 2217.16 | 1109.08 | 2216.17 | 1108.59 | D   | 474.29  | 237.65  | 457.27  | 229.14  | 456.28  | 228.64  | 4     |
| 23 | 2347.27 | 1174.14 | 2330.24 | 1165.62 | 2329.26 | 1165.13 | L   | 359.27  | 180.14  | 342.24  | 171.62  |         |         | 3     |
| 24 | 2446.33 | 1223.67 | 2429.31 | 1215.16 | 2428.32 | 1214.67 | V   | 246.18  | 123.59  | 229.15  | 115.08  |         |         | 2     |
| 25 |         |         |         |         |         |         | K   | 147.11  | 74.06   | 130.09  | 65.55   |         |         | 1     |

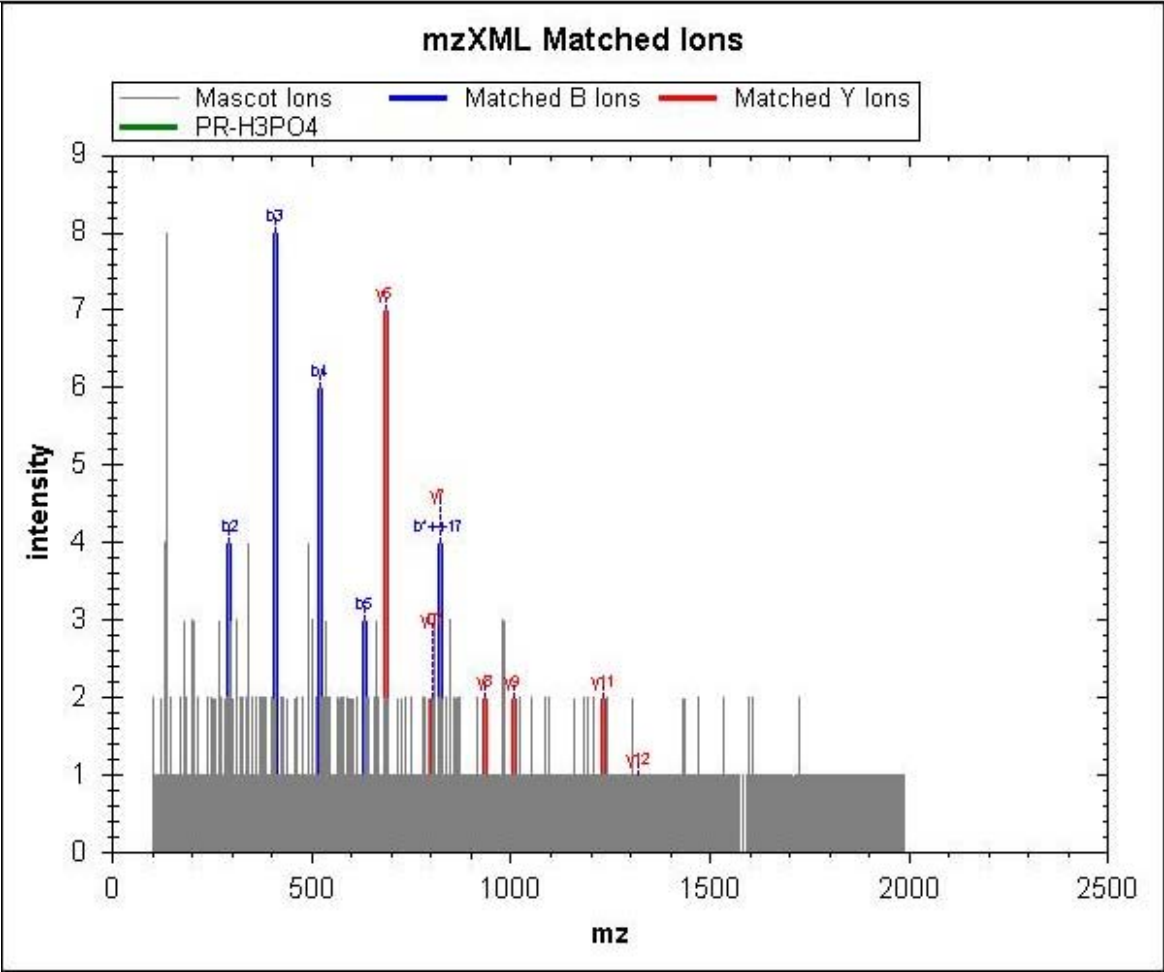

Protein index=1392, ACC No: IPI00166860

Peptide index=6965 MS/MS spectrum

Sequence: VYAVGAAVILAQLLR, m/z: 778.9572, charge: + 2, Modification: , Mod Position:

Score: 44.75, Raw data: WET\_B4\_090616\_02.mzxml, MS/MS Elution time: 102.4252, Scan number: 5733, Mass delta: -0.0451, Rank: 1

| No | b       | b++    | b*      | b*++   | Seq | y       | y++    | y*      | y*++   | RevNo |
|----|---------|--------|---------|--------|-----|---------|--------|---------|--------|-------|
| 1  | 100.08  | 50.54  |         |        | V   |         |        |         |        | 15    |
| 2  | 263.14  | 132.07 |         |        | Y   | 1457.88 | 729.45 | 1440.86 | 720.93 | 14    |
| 3  | 334.18  | 167.59 |         |        | A   | 1294.82 | 647.91 | 1277.79 | 639.4  | 13    |
| 4  | 433.24  | 217.13 |         |        | V   | 1223.78 | 612.4  | 1206.76 | 603.88 | 12    |
| 5  | 490.27  | 245.64 |         |        | G   | 1124.71 | 562.86 | 1107.69 | 554.35 | 11    |
| 6  | 561.3   | 281.16 |         |        | A   | 1067.69 | 534.35 | 1050.67 | 525.84 | 10    |
| 7  | 632.34  | 316.67 |         |        | A   | 996.66  | 498.83 | 979.63  | 490.32 | 9     |
| 8  | 731.41  | 366.21 |         |        | V   | 925.62  | 463.31 | 908.59  | 454.8  | 8     |
| 9  | 844.49  | 422.75 |         |        | I   | 826.55  | 413.78 | 809.52  | 405.27 | 7     |
| 10 | 957.58  | 479.29 |         |        | L   | 713.47  | 357.24 | 696.44  | 348.72 | 6     |
| 11 | 1028.61 | 514.81 |         |        | A   | 600.38  | 300.7  | 583.36  | 292.18 | 5     |
| 12 | 1156.67 | 578.84 | 1139.65 | 570.33 | Q   | 529.35  | 265.18 | 512.32  | 256.66 | 4     |

|    |         |        |         |        |   |        |        |        |        |   |
|----|---------|--------|---------|--------|---|--------|--------|--------|--------|---|
| 13 | 1269.76 | 635.38 | 1252.73 | 626.87 | L | 401.29 | 201.15 | 384.26 | 192.63 | 3 |
| 14 | 1382.84 | 691.92 | 1365.81 | 683.41 | L | 288.2  | 144.61 | 271.18 | 136.09 | 2 |
| 15 |         |        |         |        | R | 175.12 | 88.06  | 158.09 | 79.55  | 1 |

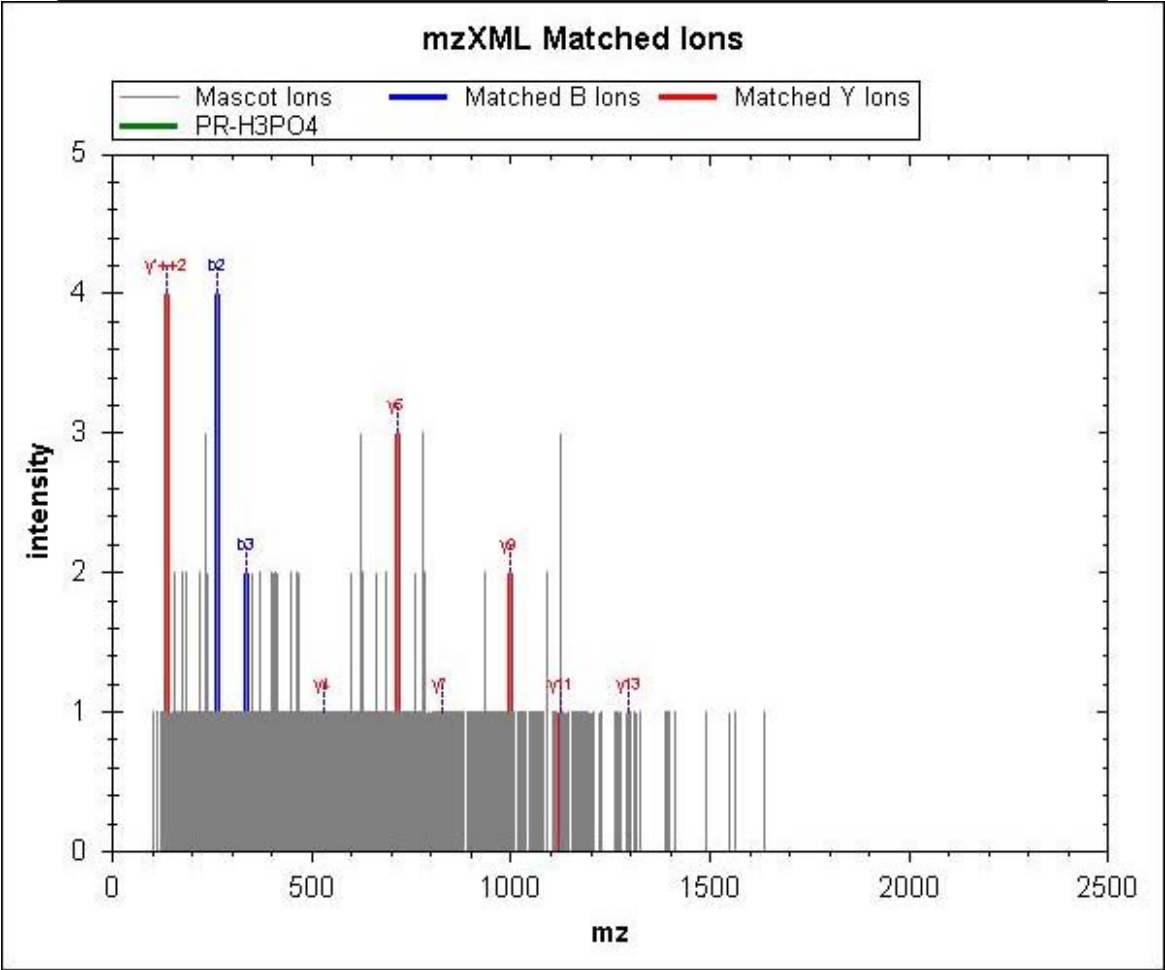

Protein index=1393, ACC No: IPI00439194

Peptide index=6529 MS/MS spectrum

Sequence: LSGLNAFDIAEELVK, m/z:809.9413, charge:+ 2, Modification: , Mod Position:

Score: 32.76, Raw data:WET\_B4\_090616\_02.mzxml, MS/MS Elution time: 90.29117, Scan number:5014, Mass delta:0.0066, Rank:1

| No | b      | b++    | b*     | b*++   | b0     | b0++   | Seq | y       | y++    | y*      | y*++   | y0      | y0++   | RevNo |
|----|--------|--------|--------|--------|--------|--------|-----|---------|--------|---------|--------|---------|--------|-------|
| 1  | 114.09 | 57.55  |        |        |        |        | L   |         |        |         |        |         |        | 15    |
| 2  | 201.12 | 101.07 |        |        | 183.11 | 92.06  | S   | 1505.78 | 753.4  | 1488.76 | 744.88 | 1487.77 | 744.39 | 14    |
| 3  | 258.14 | 129.58 |        |        | 240.13 | 120.57 | G   | 1418.75 | 709.88 | 1401.73 | 701.37 | 1400.74 | 700.87 | 13    |
| 4  | 371.23 | 186.12 |        |        | 353.22 | 177.11 | L   | 1361.73 | 681.37 | 1344.7  | 672.86 | 1343.72 | 672.36 | 12    |
| 5  | 485.27 | 243.14 | 468.25 | 234.63 | 467.26 | 234.13 | N   | 1248.65 | 624.83 | 1231.62 | 616.31 | 1230.64 | 615.82 | 11    |
| 6  | 556.31 | 278.66 | 539.28 | 270.14 | 538.3  | 269.65 | A   | 1134.6  | 567.81 | 1117.58 | 559.29 | 1116.59 | 558.8  | 10    |
| 7  | 703.38 | 352.19 | 686.35 | 343.68 | 685.37 | 343.19 | F   | 1063.57 | 532.29 | 1046.54 | 523.77 | 1045.56 | 523.28 | 9     |
| 8  | 818.4  | 409.71 | 801.38 | 401.19 | 800.39 | 400.7  | D   | 916.5   | 458.75 | 899.47  | 450.24 | 898.49  | 449.75 | 8     |
| 9  | 931.49 | 466.25 | 914.46 | 457.73 | 913.48 | 457.24 | I   | 801.47  | 401.24 | 784.45  | 392.73 | 783.46  | 392.23 | 7     |

|    |         |        |         |        |         |        |   |        |        |        |        |        |        |   |
|----|---------|--------|---------|--------|---------|--------|---|--------|--------|--------|--------|--------|--------|---|
| 10 | 1002.53 | 501.77 | 985.5   | 493.25 | 984.51  | 492.76 | A | 688.39 | 344.7  | 671.36 | 336.18 | 670.38 | 335.69 | 6 |
| 11 | 1131.57 | 566.29 | 1114.54 | 557.77 | 1113.56 | 557.28 | E | 617.35 | 309.18 | 600.32 | 300.67 | 599.34 | 300.17 | 5 |
| 12 | 1260.61 | 630.81 | 1243.58 | 622.3  | 1242.6  | 621.8  | E | 488.31 | 244.66 | 471.28 | 236.14 | 470.3  | 235.65 | 4 |
| 13 | 1373.69 | 687.35 | 1356.67 | 678.84 | 1355.68 | 678.35 | L | 359.27 | 180.14 | 342.24 | 171.62 |        |        | 3 |
| 14 | 1472.76 | 736.89 | 1455.74 | 728.37 | 1454.75 | 727.88 | V | 246.18 | 123.59 | 229.15 | 115.08 |        |        | 2 |
| 15 |         |        |         |        |         |        | K | 147.11 | 74.06  | 130.09 | 65.55  |        |        | 1 |

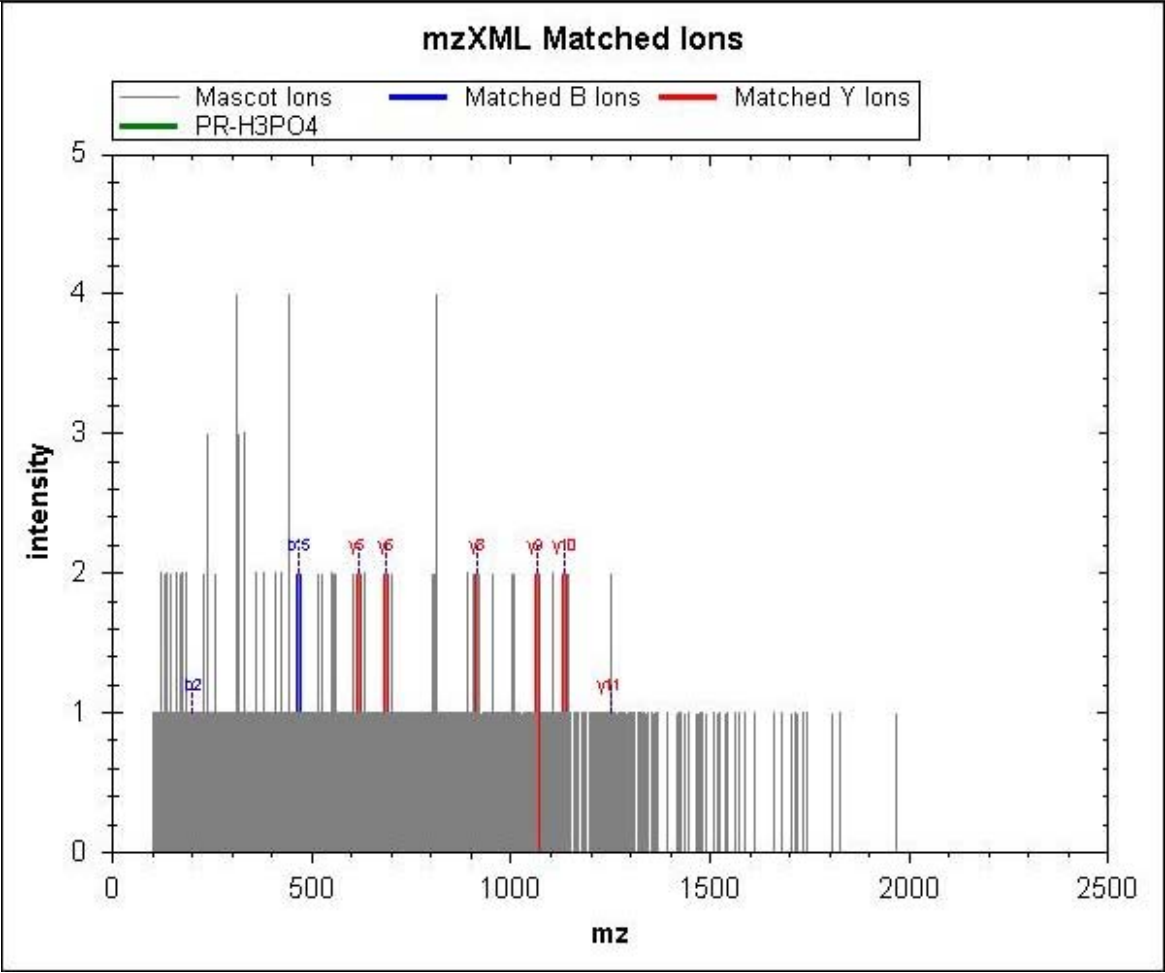

Protein index=1395, ACC No:IPI00394809

Peptide index=1297 MS/MS spectrum

Sequence: LGSSSEIEVPAK, m/z:608.8294, charge:+ 2, Modification: , Mod Position:

Score: 61.73, Raw data:WET\_B4\_090616\_02.mzxml, MS/MS Elution time: 31.7185, Scan number:1612, Mass delta:0.0096, Rank:1

| No | b      | b++    | b0     | b0++   | Seq | y       | y++    | y*      | y*++   | y0      | y0++   | RevNo |
|----|--------|--------|--------|--------|-----|---------|--------|---------|--------|---------|--------|-------|
| 1  | 114.09 | 57.55  |        |        | L   |         |        |         |        |         |        | 12    |
| 2  | 171.11 | 86.06  |        |        | G   | 1103.56 | 552.28 | 1086.53 | 543.77 | 1085.55 | 543.28 | 11    |
| 3  | 258.14 | 129.58 | 240.13 | 120.57 | S   | 1046.54 | 523.77 | 1029.51 | 515.26 | 1028.53 | 514.77 | 10    |
| 4  | 345.18 | 173.09 | 327.17 | 164.09 | S   | 959.5   | 480.26 | 942.48  | 471.74 | 941.49  | 471.25 | 9     |
| 5  | 432.21 | 216.61 | 414.2  | 207.6  | S   | 872.47  | 436.74 | 855.45  | 428.23 | 854.46  | 427.73 | 8     |
| 6  | 561.25 | 281.13 | 543.24 | 272.12 | E   | 785.44  | 393.22 | 768.41  | 384.71 | 767.43  | 384.22 | 7     |

|    |         |        |         |        |   |        |        |        |        |        |        |   |
|----|---------|--------|---------|--------|---|--------|--------|--------|--------|--------|--------|---|
| 7  | 674.34  | 337.67 | 656.33  | 328.67 | I | 656.4  | 328.7  | 639.37 | 320.19 | 638.39 | 319.7  | 6 |
| 8  | 803.38  | 402.19 | 785.37  | 393.19 | E | 543.31 | 272.16 | 526.29 | 263.65 | 525.3  | 263.16 | 5 |
| 9  | 902.45  | 451.73 | 884.44  | 442.72 | V | 414.27 | 207.64 | 397.24 | 199.13 |        |        | 4 |
| 10 | 999.5   | 500.25 | 981.49  | 491.25 | P | 315.2  | 158.1  | 298.18 | 149.59 |        |        | 3 |
| 11 | 1070.54 | 535.77 | 1052.53 | 526.77 | A | 218.15 | 109.58 | 201.12 | 101.07 |        |        | 2 |
| 12 |         |        |         |        | K | 147.11 | 74.06  | 130.09 | 65.55  |        |        | 1 |

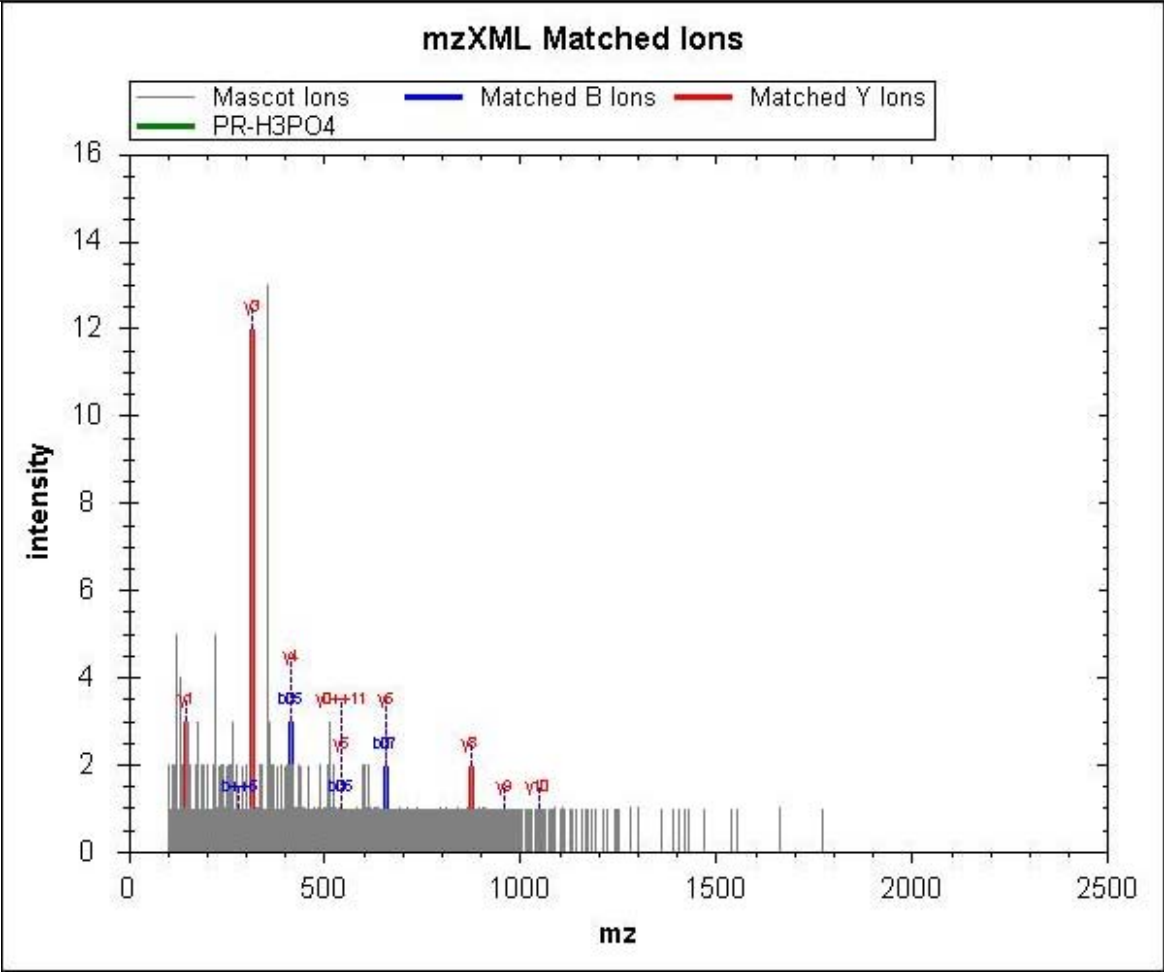

Protein index=1396, ACC No:IP100004672

Peptide index=4231 MS/MS spectrum

Sequence: FISVGYVDDTQFVR, m/z:823.4083, charge:+ 2, Modification: , Mod Position:

Score: 80.31, Raw data:WET\_B4\_090616\_02.mzxml, MS/MS Elution time: 60.31567, Scan number:3273, Mass delta:-0.0128, Rank:1

| No | b      | b++    | b* | b*++ | b0     | b0++   | Seq | y       | y++    | y*      | y*++   | y0      | y0++   | RevNo |
|----|--------|--------|----|------|--------|--------|-----|---------|--------|---------|--------|---------|--------|-------|
| 1  | 148.08 | 74.54  |    |      |        |        | F   |         |        |         |        |         |        | 14    |
| 2  | 261.16 | 131.08 |    |      |        |        | I   | 1498.75 | 749.88 | 1481.73 | 741.37 | 1480.74 | 740.88 | 13    |
| 3  | 348.19 | 174.6  |    |      | 330.18 | 165.59 | S   | 1385.67 | 693.34 | 1368.64 | 684.83 | 1367.66 | 684.33 | 12    |
| 4  | 447.26 | 224.13 |    |      | 429.25 | 215.13 | V   | 1298.64 | 649.82 | 1281.61 | 641.31 | 1280.63 | 640.82 | 11    |
| 5  | 504.28 | 252.64 |    |      | 486.27 | 243.64 | G   | 1199.57 | 600.29 | 1182.54 | 591.77 | 1181.56 | 591.28 | 10    |
| 6  | 667.34 | 334.18 |    |      | 649.33 | 325.17 | Y   | 1142.55 | 571.78 | 1125.52 | 563.26 | 1124.54 | 562.77 | 9     |

[illegible]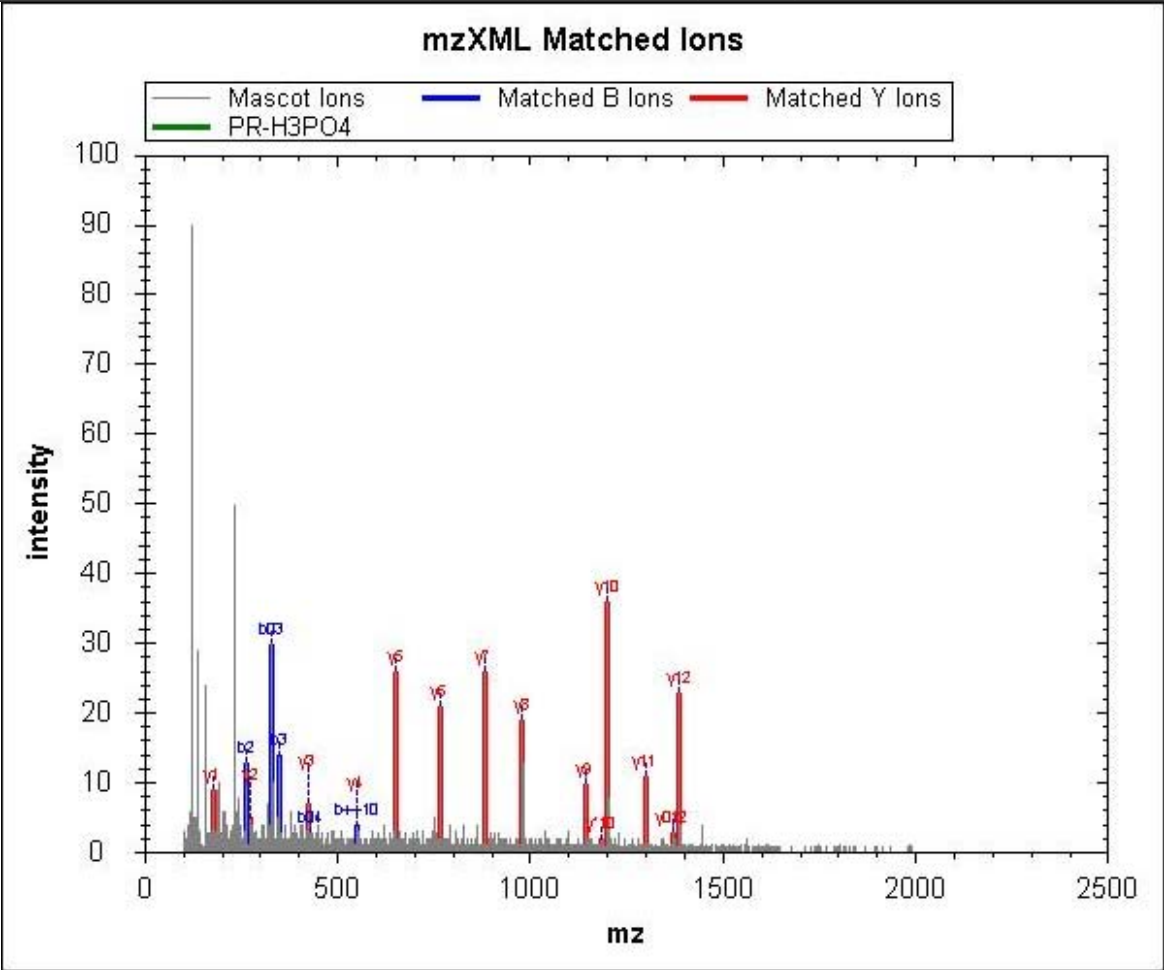

Peptide index=4248 MS/MS spectrum

Score: 32.1, Raw data:WET\_B4\_090616\_02.mzxml, MS/MS Elution time: 60.43817, Scan number:3280, Mass delta:-0.0589, Rank:1

[illegible]

|    |         |        |         |        |         |        |   |        |        |        |        |        |        |   |
|----|---------|--------|---------|--------|---------|--------|---|--------|--------|--------|--------|--------|--------|---|
| 5  | 546.29  | 273.65 |         |        | 528.28  | 264.64 | L | 961.51 | 481.26 | 944.48 | 472.75 | 943.5  | 472.25 | 8 |
| 6  | 643.35  | 322.18 |         |        | 625.33  | 313.17 | P | 848.43 | 424.72 | 831.4  | 416.2  | 830.42 | 415.71 | 7 |
| 7  | 756.43  | 378.72 |         |        | 738.42  | 369.71 | I | 751.37 | 376.19 | 734.35 | 367.68 | 733.36 | 367.18 | 6 |
| 8  | 870.47  | 435.74 | 853.45  | 427.23 | 852.46  | 426.73 | N | 638.29 | 319.65 | 621.26 | 311.13 | 620.28 | 310.64 | 5 |
| 9  | 985.5   | 493.25 | 968.47  | 484.74 | 967.49  | 484.25 | D | 524.25 | 262.63 | 507.22 | 254.11 | 506.24 | 253.62 | 4 |
| 10 | 1132.57 | 566.79 | 1115.54 | 558.27 | 1114.56 | 557.78 | F | 409.22 | 205.11 | 392.19 | 196.6  | 391.21 | 196.11 | 3 |
| 11 | 1219.6  | 610.3  | 1202.57 | 601.79 | 1201.59 | 601.3  | S | 262.15 | 131.58 | 245.12 | 123.07 | 244.14 | 122.57 | 2 |
| 12 |         |        |         |        |         |        | R | 175.12 | 88.06  | 158.09 | 79.55  |        |        | 1 |

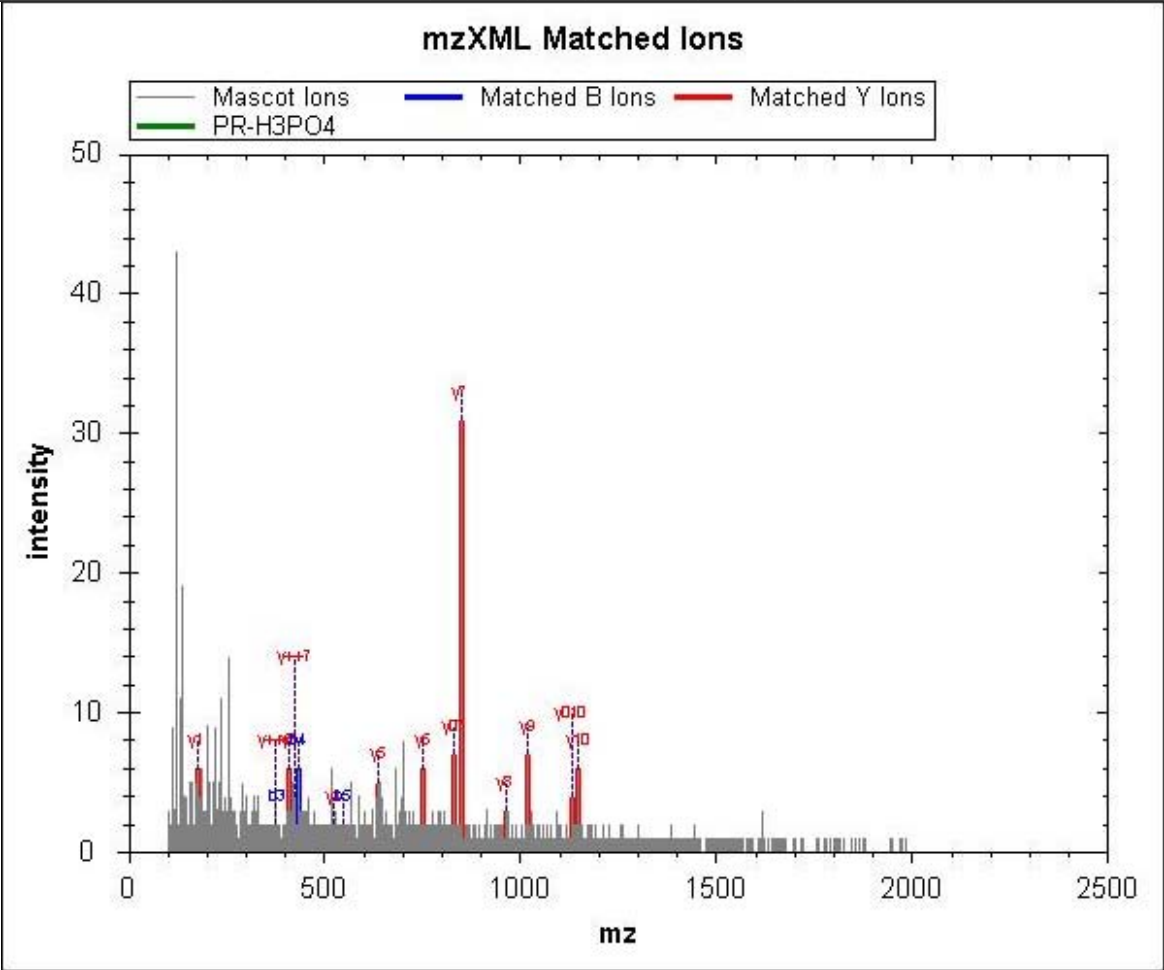

Protein index=1398, ACC No: IPI00418983

Peptide index=6543 MS/MS spectrum

Sequence: SELEILKEKLR, m/z:679.3696, charge:+ 2, Modification: , Mod Position:

Score: 35.39, Raw data:WET\_B4\_090616\_02.mzxml, MS/MS Elution time: 90.55666, Scan number:5030, Mass delta:-0.0729, Rank:1

| No | b      | b++    | b* | b*++ | b0     | b0++   | Seq | y       | y++    | y*      | y*++   | y0      | y0++   | RevNo |
|----|--------|--------|----|------|--------|--------|-----|---------|--------|---------|--------|---------|--------|-------|
| 1  | 88.04  | 44.52  |    |      | 70.03  | 35.52  | S   |         |        |         |        |         |        | 11    |
| 2  | 217.08 | 109.04 |    |      | 199.07 | 100.04 | E   | 1270.77 | 635.89 | 1253.75 | 627.38 | 1252.76 | 626.88 | 10    |
| 3  | 330.17 | 165.59 |    |      | 312.16 | 156.58 | L   | 1141.73 | 571.37 | 1124.7  | 562.86 | 1123.72 | 562.36 | 9     |
| 4  | 459.21 | 230.11 |    |      | 441.2  | 221.1  | E   | 1028.65 | 514.83 | 1011.62 | 506.31 | 1010.64 | 505.82 | 8     |

|    |         |        |         |        |         |        |   |        |        |        |        |        |        |   |
|----|---------|--------|---------|--------|---------|--------|---|--------|--------|--------|--------|--------|--------|---|
| 5  | 572.29  | 286.65 |         |        | 554.28  | 277.64 | I | 899.6  | 450.31 | 882.58 | 441.79 | 881.59 | 441.3  | 7 |
| 6  | 685.38  | 343.19 |         |        | 667.37  | 334.19 | L | 786.52 | 393.76 | 769.49 | 385.25 | 768.51 | 384.76 | 6 |
| 7  | 813.47  | 407.24 | 796.45  | 398.73 | 795.46  | 398.23 | K | 673.44 | 337.22 | 656.41 | 328.71 | 655.42 | 328.22 | 5 |
| 8  | 942.51  | 471.76 | 925.49  | 463.25 | 924.5   | 462.76 | E | 545.34 | 273.17 | 528.31 | 264.66 | 527.33 | 264.17 | 4 |
| 9  | 1070.61 | 535.81 | 1053.58 | 527.3  | 1052.6  | 526.8  | K | 416.3  | 208.65 | 399.27 | 200.14 |        |        | 3 |
| 10 | 1183.69 | 592.35 | 1166.67 | 583.84 | 1165.68 | 583.35 | L | 288.2  | 144.61 | 271.18 | 136.09 |        |        | 2 |
| 11 |         |        |         |        |         |        | R | 175.12 | 88.06  | 158.09 | 79.55  |        |        | 1 |

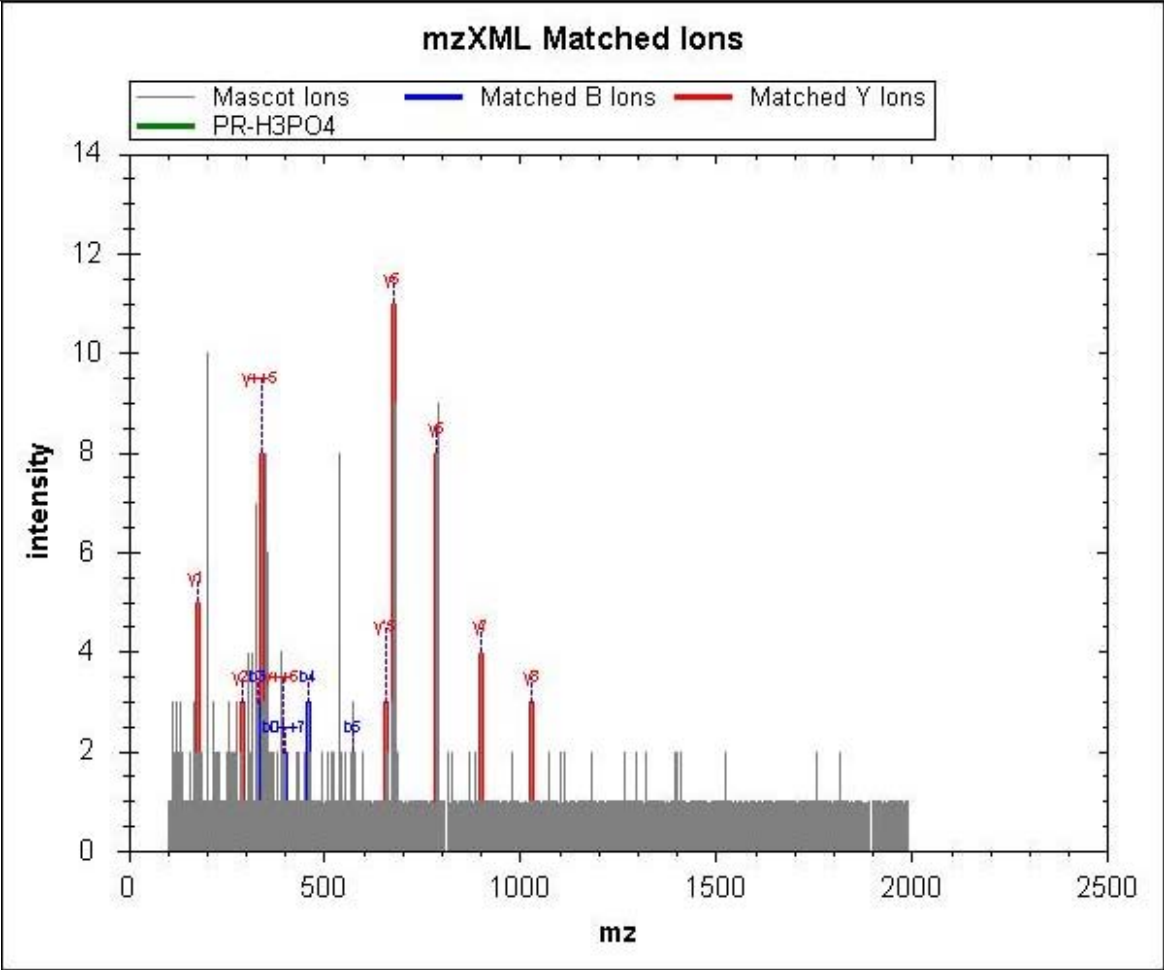

Protein index=1399, ACC No: IPI00026244

Peptide index=4157 MS/MS spectrum

Sequence: FDPQGGLAGIAAIK, m/z:679.374, charge:+ 2, Modification: , Mod Position:

Score: 58.72, Raw data:WET\_B4\_090616\_03.mzxml, MS/MS Elution time: 59.7025, Scan number:3257, Mass delta:-0.0066, Rank:1

| No | b      | b++    | b*     | b*++   | b0     | b0++   | Seq | y       | y++    | y*      | y*++   | y0      | y0++   | RevNo |
|----|--------|--------|--------|--------|--------|--------|-----|---------|--------|---------|--------|---------|--------|-------|
| 1  | 148.08 | 74.54  |        |        |        |        | F   |         |        |         |        |         |        | 14    |
| 2  | 263.1  | 132.05 |        |        | 245.09 | 123.05 | D   | 1210.68 | 605.84 | 1193.65 | 597.33 | 1192.67 | 596.84 | 13    |
| 3  | 360.16 | 180.58 |        |        | 342.14 | 171.58 | P   | 1095.65 | 548.33 | 1078.63 | 539.82 |         |        | 12    |
| 4  | 488.21 | 244.61 | 471.19 | 236.1  | 470.2  | 235.61 | Q   | 998.6   | 499.8  | 981.57  | 491.29 |         |        | 11    |
| 5  | 545.24 | 273.12 | 528.21 | 264.61 | 527.22 | 264.12 | G   | 870.54  | 435.77 | 853.51  | 427.26 |         |        | 10    |

|    |         |        |         |        |         |        |   |        |        |        |        |  |  |   |
|----|---------|--------|---------|--------|---------|--------|---|--------|--------|--------|--------|--|--|---|
| 6  | 602.26  | 301.63 | 585.23  | 293.12 | 584.25  | 292.63 | G | 813.52 | 407.26 | 796.49 | 398.75 |  |  | 9 |
| 7  | 715.34  | 358.17 | 698.31  | 349.66 | 697.33  | 349.17 | L | 756.5  | 378.75 | 739.47 | 370.24 |  |  | 8 |
| 8  | 786.38  | 393.69 | 769.35  | 385.18 | 768.37  | 384.69 | A | 643.41 | 322.21 | 626.39 | 313.7  |  |  | 7 |
| 9  | 843.4   | 422.2  | 826.37  | 413.69 | 825.39  | 413.2  | G | 572.38 | 286.69 | 555.35 | 278.18 |  |  | 6 |
| 10 | 956.48  | 478.75 | 939.46  | 470.23 | 938.47  | 469.74 | I | 515.36 | 258.18 | 498.33 | 249.67 |  |  | 5 |
| 11 | 1027.52 | 514.26 | 1010.49 | 505.75 | 1009.51 | 505.26 | A | 402.27 | 201.64 | 385.24 | 193.13 |  |  | 4 |
| 12 | 1098.56 | 549.78 | 1081.53 | 541.27 | 1080.55 | 540.78 | A | 331.23 | 166.12 | 314.21 | 157.61 |  |  | 3 |
| 13 | 1211.64 | 606.32 | 1194.62 | 597.81 | 1193.63 | 597.32 | I | 260.2  | 130.6  | 243.17 | 122.09 |  |  | 2 |
| 14 |         |        |         |        |         |        | K | 147.11 | 74.06  | 130.09 | 65.55  |  |  | 1 |

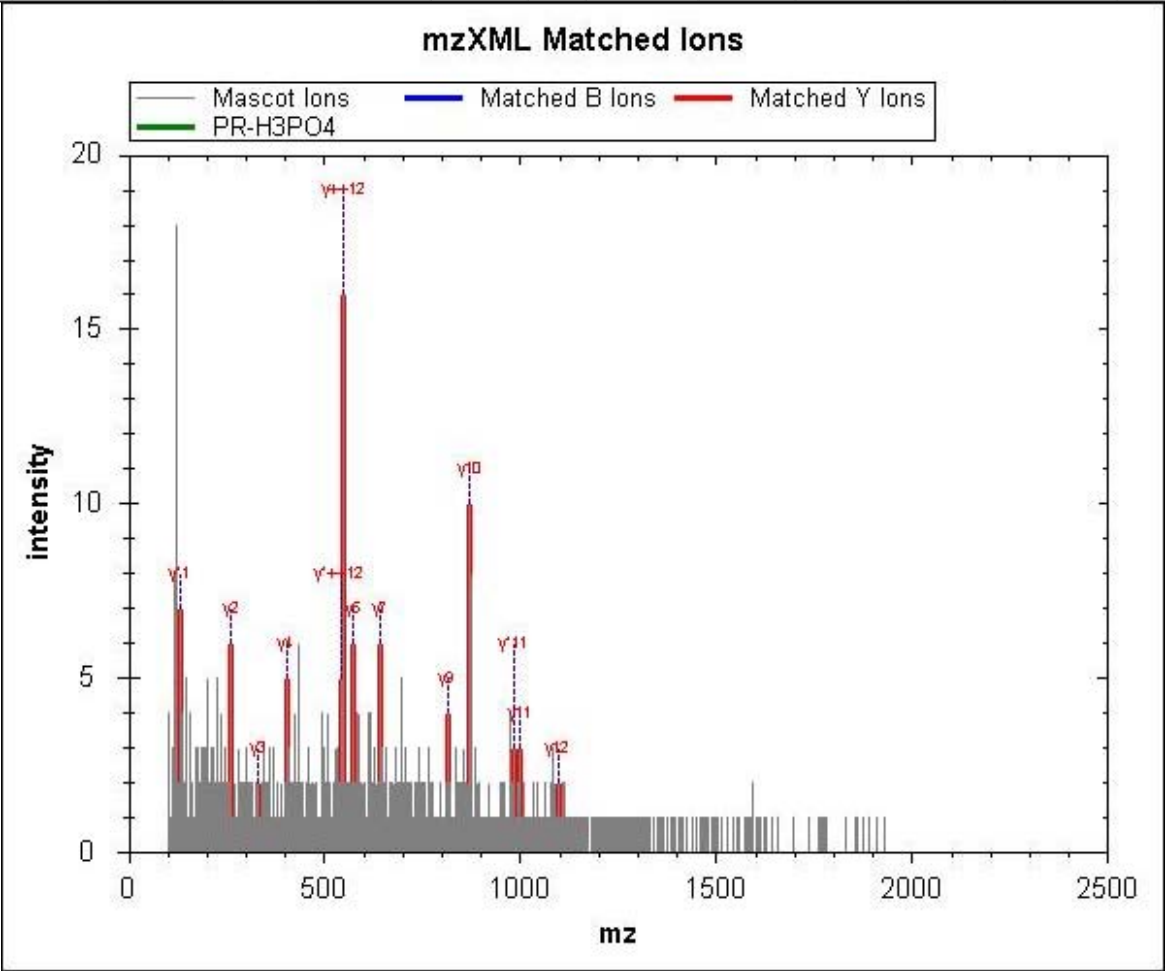

Protein index=1400, ACC No: IPI00294229

Peptide index=4185 MS/MS spectrum

Sequence: LLEEIYR, m/z:524.8017, charge:+ 2, Modification: , Mod Position:

Score: 47.68, Raw data:WET\_B4\_090616\_03.mzxml, MS/MS Elution time: 59.92717, Scan number:3270, Mass delta:-0.0076, Rank:1

| No | b      | b++    | b0 | b0++ | Seq | y      | y++    | y*     | y*++   | y0     | y0++   | RevNo |
|----|--------|--------|----|------|-----|--------|--------|--------|--------|--------|--------|-------|
| 1  | 114.09 | 57.55  |    |      | L   |        |        |        |        |        |        | 8     |
| 2  | 227.18 | 114.09 |    |      | L   | 935.52 | 468.26 | 918.49 | 459.75 | 917.51 | 459.26 | 7     |
| 3  | 340.26 | 170.63 |    |      | L   | 822.44 | 411.72 | 805.41 | 403.21 | 804.42 | 402.72 | 6     |

|   |        |        |        |        |   |        |        |        |        |        |        |   |
|---|--------|--------|--------|--------|---|--------|--------|--------|--------|--------|--------|---|
| 4 | 469.3  | 235.15 | 451.29 | 226.15 | E | 709.35 | 355.18 | 692.32 | 346.67 | 691.34 | 346.17 | 5 |
| 5 | 598.34 | 299.68 | 580.33 | 290.67 | E | 580.31 | 290.66 | 563.28 | 282.14 | 562.3  | 281.65 | 4 |
| 6 | 711.43 | 356.22 | 693.42 | 347.21 | I | 451.27 | 226.14 | 434.24 | 217.62 |        |        | 3 |
| 7 | 874.49 | 437.75 | 856.48 | 428.74 | Y | 338.18 | 169.59 | 321.16 | 161.08 |        |        | 2 |
| 8 |        |        |        |        | R | 175.12 | 88.06  | 158.09 | 79.55  |        |        | 1 |

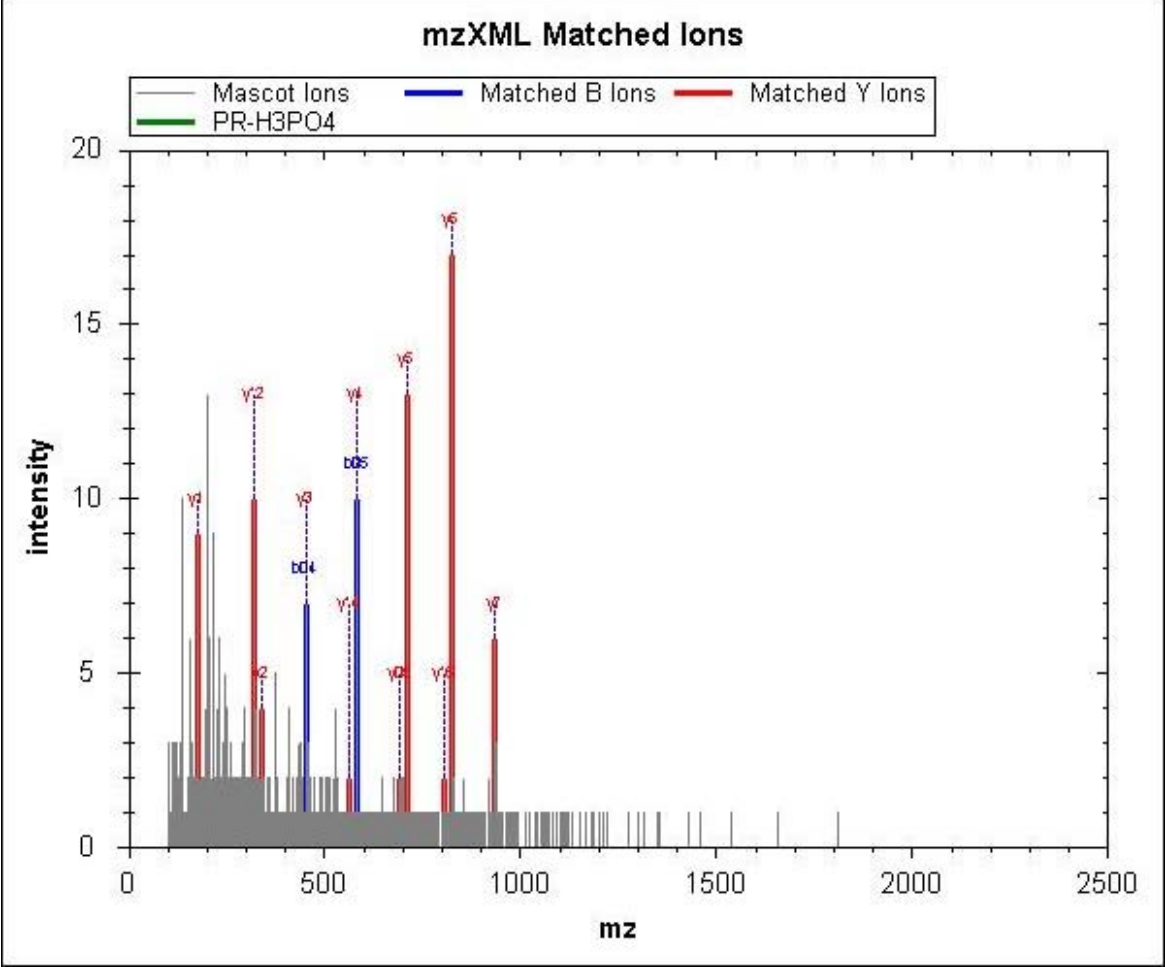

Protein index=1401, ACC No:IPI00018333

Peptide index=6871 MS/MS spectrum

Sequence: LYQFLDLLR, m/z:647.391, charge:+ 2, Modification: , Mod Position:

Score: 36.88, Raw data:WET\_B4\_090616\_03.mzxml, MS/MS Elution time: 98.6315, Scan number:5539, Mass delta:0.0183, Rank:1

| No | b      | b++    | b*     | b*++   | b0     | b0++   | Seq | y       | y++    | y*      | y*++   | y0      | y0++   | RevNo |
|----|--------|--------|--------|--------|--------|--------|-----|---------|--------|---------|--------|---------|--------|-------|
| 1  | 114.09 | 57.55  |        |        |        |        | L   |         |        |         |        |         |        | 10    |
| 2  | 277.15 | 139.08 |        |        |        |        | Y   | 1180.67 | 590.84 | 1163.65 | 582.33 | 1162.66 | 581.83 | 9     |
| 3  | 405.21 | 203.11 | 388.19 | 194.6  |        |        | Q   | 1017.61 | 509.31 | 1000.58 | 500.79 | 999.6   | 500.3  | 8     |
| 4  | 552.28 | 276.64 | 535.26 | 268.13 |        |        | F   | 889.55  | 445.28 | 872.52  | 436.77 | 871.54  | 436.27 | 7     |
| 5  | 665.37 | 333.19 | 648.34 | 324.67 |        |        | L   | 742.48  | 371.74 | 725.46  | 363.23 | 724.47  | 362.74 | 6     |
| 6  | 778.45 | 389.73 | 761.42 | 381.22 |        |        | L   | 629.4   | 315.2  | 612.37  | 306.69 | 611.39  | 306.2  | 5     |
| 7  | 893.48 | 447.24 | 876.45 | 438.73 | 875.47 | 438.24 | D   | 516.31  | 258.66 | 499.29  | 250.15 | 498.3   | 249.66 | 4     |

|    |         |        |         |        |         |        |   |        |        |        |        |  |  |   |
|----|---------|--------|---------|--------|---------|--------|---|--------|--------|--------|--------|--|--|---|
| 8  | 1006.56 | 503.78 | 989.53  | 495.27 | 988.55  | 494.78 | L | 401.29 | 201.15 | 384.26 | 192.63 |  |  | 3 |
| 9  | 1119.64 | 560.33 | 1102.62 | 551.81 | 1101.63 | 551.32 | L | 288.2  | 144.61 | 271.18 | 136.09 |  |  | 2 |
| 10 |         |        |         |        |         |        | R | 175.12 | 88.06  | 158.09 | 79.55  |  |  | 1 |

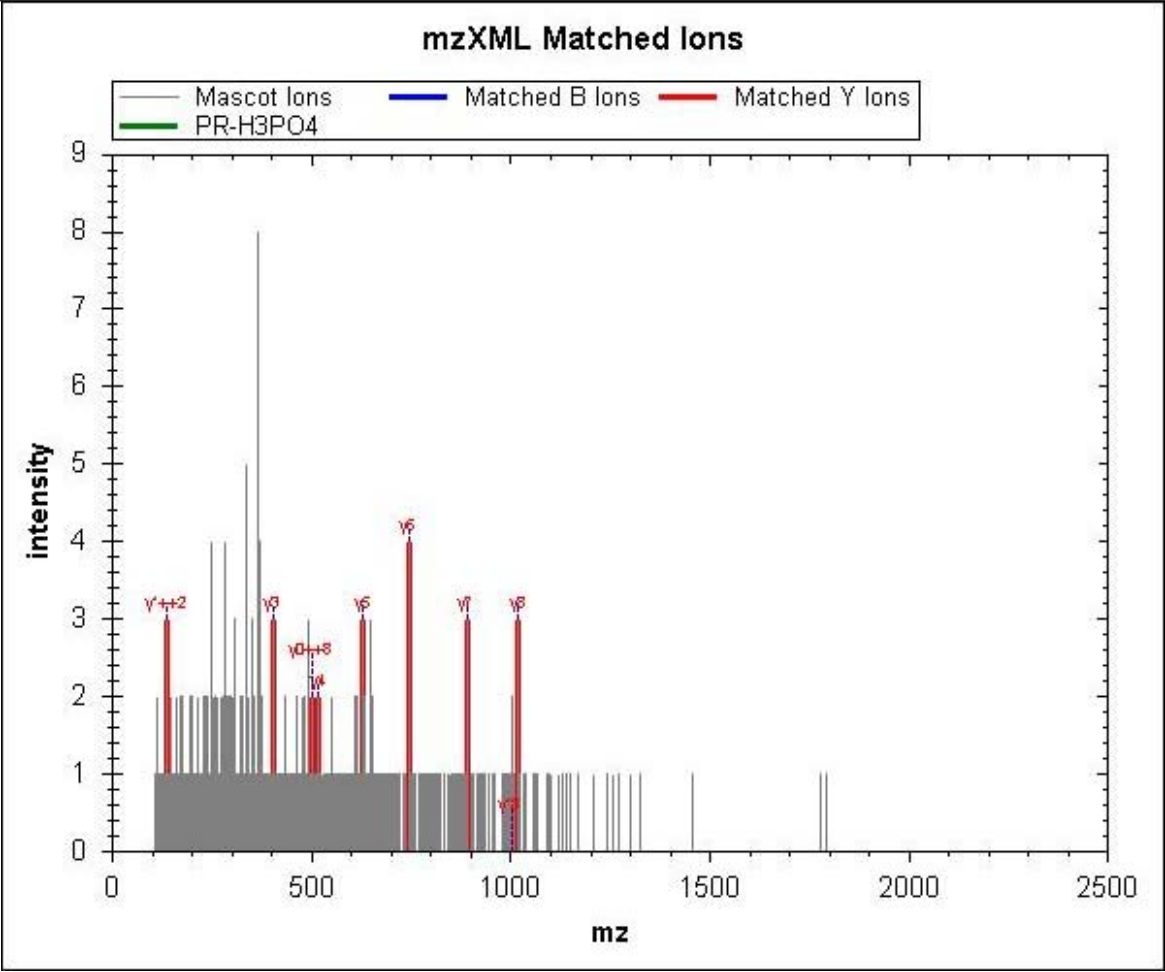

Protein index=1402, ACC No: IPI00001539

Peptide index=6576 MS/MS spectrum

Sequence: VSPETVDSVIMGNVLQSSSDAIYLAR, m/z:917.8052, charge:+ 3, Modification: , Mod Position:

Score: 84.47, Raw data:WET\_B4\_090616\_03.mzxml, MS/MS Elution time: 91.31417, Scan number:5108, Mass delta:0.0142, Rank:1

| No | b      | b++    | b* | b*++ | b0     | b0++   | Seq | y       | y++     | y*      | y*++    | y0      | y0++    | RevNo |
|----|--------|--------|----|------|--------|--------|-----|---------|---------|---------|---------|---------|---------|-------|
| 1  | 100.08 | 50.54  |    |      |        |        | V   |         |         |         |         |         |         | 26    |
| 2  | 187.11 | 94.06  |    |      | 169.1  | 85.05  | S   | 2652.32 | 1326.66 | 2635.29 | 1318.15 | 2634.31 | 1317.66 | 25    |
| 3  | 284.16 | 142.58 |    |      | 266.15 | 133.58 | P   | 2565.29 | 1283.15 | 2548.26 | 1274.63 | 2547.28 | 1274.14 | 24    |
| 4  | 413.2  | 207.11 |    |      | 395.19 | 198.1  | E   | 2468.23 | 1234.62 | 2451.21 | 1226.11 | 2450.22 | 1225.62 | 23    |
| 5  | 514.25 | 257.63 |    |      | 496.24 | 248.62 | T   | 2339.19 | 1170.1  | 2322.16 | 1161.59 | 2321.18 | 1161.09 | 22    |
| 6  | 613.32 | 307.16 |    |      | 595.31 | 298.16 | V   | 2238.14 | 1119.58 | 2221.12 | 1111.06 | 2220.13 | 1110.57 | 21    |
| 7  | 728.35 | 364.68 |    |      | 710.34 | 355.67 | D   | 2139.07 | 1070.04 | 2122.05 | 1061.53 | 2121.06 | 1061.04 | 20    |
| 8  | 815.38 | 408.19 |    |      | 797.37 | 399.19 | S   | 2024.05 | 1012.53 | 2007.02 | 1004.01 | 2006.04 | 1003.52 | 19    |

|    |         |         |         |         |         |         |   |         |        |         |        |         |        |    |
|----|---------|---------|---------|---------|---------|---------|---|---------|--------|---------|--------|---------|--------|----|
| 9  | 914.45  | 457.73  |         |         | 896.44  | 448.72  | V | 1937.02 | 969.01 | 1919.99 | 960.5  | 1919.01 | 960.01 | 18 |
| 10 | 1027.53 | 514.27  |         |         | 1009.52 | 505.26  | I | 1837.95 | 919.48 | 1820.92 | 910.96 | 1819.94 | 910.47 | 17 |
| 11 | 1158.57 | 579.79  |         |         | 1140.56 | 570.78  | M | 1724.86 | 862.94 | 1707.84 | 854.42 | 1706.85 | 853.93 | 16 |
| 12 | 1215.59 | 608.3   |         |         | 1197.58 | 599.29  | G | 1593.82 | 797.42 | 1576.8  | 788.9  | 1575.81 | 788.41 | 15 |
| 13 | 1329.64 | 665.32  | 1312.61 | 656.81  | 1311.62 | 656.32  | N | 1536.8  | 768.9  | 1519.78 | 760.39 | 1518.79 | 759.9  | 14 |
| 14 | 1428.7  | 714.86  | 1411.68 | 706.34  | 1410.69 | 705.85  | V | 1422.76 | 711.88 | 1405.73 | 703.37 | 1404.75 | 702.88 | 13 |
| 15 | 1541.79 | 771.4   | 1524.76 | 762.88  | 1523.78 | 762.39  | L | 1323.69 | 662.35 | 1306.66 | 653.84 | 1305.68 | 653.34 | 12 |
| 16 | 1669.85 | 835.43  | 1652.82 | 826.91  | 1651.84 | 826.42  | Q | 1210.61 | 605.81 | 1193.58 | 597.29 | 1192.6  | 596.8  | 11 |
| 17 | 1756.88 | 878.94  | 1739.85 | 870.43  | 1738.87 | 869.94  | S | 1082.55 | 541.78 | 1065.52 | 533.26 | 1064.54 | 532.77 | 10 |
| 18 | 1843.91 | 922.46  | 1826.88 | 913.95  | 1825.9  | 913.45  | S | 995.52  | 498.26 | 978.49  | 489.75 | 977.51  | 489.26 | 9  |
| 19 | 1930.94 | 965.97  | 1913.92 | 957.46  | 1912.93 | 956.97  | S | 908.48  | 454.75 | 891.46  | 446.23 | 890.47  | 445.74 | 8  |
| 20 | 2045.97 | 1023.49 | 2028.94 | 1014.98 | 2027.96 | 1014.48 | D | 821.45  | 411.23 | 804.42  | 402.72 | 803.44  | 402.22 | 7  |
| 21 | 2117.01 | 1059.01 | 2099.98 | 1050.49 | 2099    | 1050    | A | 706.42  | 353.72 | 689.4   | 345.2  |         |        | 6  |
| 22 | 2230.09 | 1115.55 | 2213.06 | 1107.04 | 2212.08 | 1106.54 | I | 635.39  | 318.2  | 618.36  | 309.68 |         |        | 5  |
| 23 | 2393.15 | 1197.08 | 2376.13 | 1188.57 | 2375.14 | 1188.08 | Y | 522.3   | 261.66 | 505.28  | 253.14 |         |        | 4  |
| 24 | 2506.24 | 1253.62 | 2489.21 | 1245.11 | 2488.23 | 1244.62 | L | 359.24  | 180.12 | 342.21  | 171.61 |         |        | 3  |
| 25 | 2577.28 | 1289.14 | 2560.25 | 1280.63 | 2559.26 | 1280.14 | A | 246.16  | 123.58 | 229.13  | 115.07 |         |        | 2  |
| 26 |         |         |         |         |         |         | R | 175.12  | 88.06  | 158.09  | 79.55  |         |        | 1  |

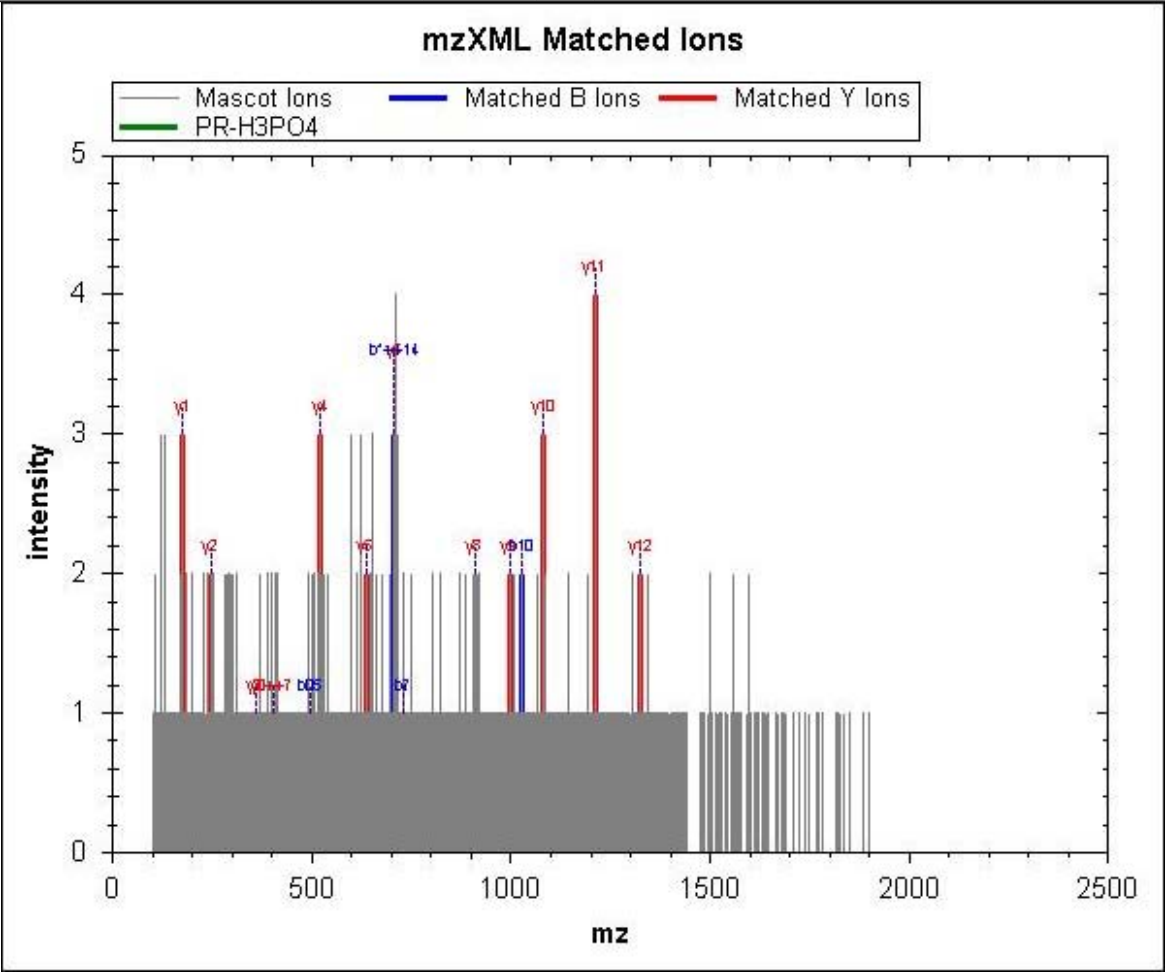

Protein index=1403, ACC No: IPI00798360

Peptide index=1909 MS/MS spectrum



Mass delta:0.0788, Rank:1

| No | b       | b++    | b*      | b*++   | b0      | b0++   | Seq | y       | y++    | y*      | y*++   | y0      | y0++   | RevNo |
|----|---------|--------|---------|--------|---------|--------|-----|---------|--------|---------|--------|---------|--------|-------|
| 1  | 130.05  | 65.53  |         |        | 112.04  | 56.52  | E   |         |        |         |        |         |        | 11    |
| 2  | 258.11  | 129.56 | 241.08  | 121.04 | 240.1   | 120.55 | Q   | 1171.62 | 586.31 | 1154.59 | 577.8  | 1153.61 | 577.31 | 10    |
| 3  | 329.15  | 165.08 | 312.12  | 156.56 | 311.13  | 156.07 | A   | 1043.56 | 522.28 | 1026.53 | 513.77 | 1025.55 | 513.28 | 9     |
| 4  | 458.19  | 229.6  | 441.16  | 221.08 | 440.18  | 220.59 | E   | 972.52  | 486.76 | 955.5   | 478.25 | 954.51  | 477.76 | 8     |
| 5  | 571.27  | 286.14 | 554.25  | 277.63 | 553.26  | 277.13 | L   | 843.48  | 422.24 | 826.45  | 413.73 | 825.47  | 413.24 | 7     |
| 6  | 700.31  | 350.66 | 683.29  | 342.15 | 682.3   | 341.66 | E   | 730.4   | 365.7  | 713.37  | 357.19 | 712.38  | 356.7  | 6     |
| 7  | 771.35  | 386.18 | 754.33  | 377.67 | 753.34  | 377.17 | A   | 601.35  | 301.18 | 584.33  | 292.67 |         |        | 5     |
| 8  | 842.39  | 421.7  | 825.36  | 413.18 | 824.38  | 412.69 | A   | 530.32  | 265.66 | 513.29  | 257.15 |         |        | 4     |
| 9  | 998.49  | 499.75 | 981.46  | 491.24 | 980.48  | 490.74 | R   | 459.28  | 230.14 | 442.25  | 221.63 |         |        | 3     |
| 10 | 1126.55 | 563.78 | 1109.52 | 555.26 | 1108.54 | 554.77 | Q   | 303.18  | 152.09 | 286.15  | 143.58 |         |        | 2     |
| 11 |         |        |         |        |         |        | R   | 175.12  | 88.06  | 158.09  | 79.55  |         |        | 1     |

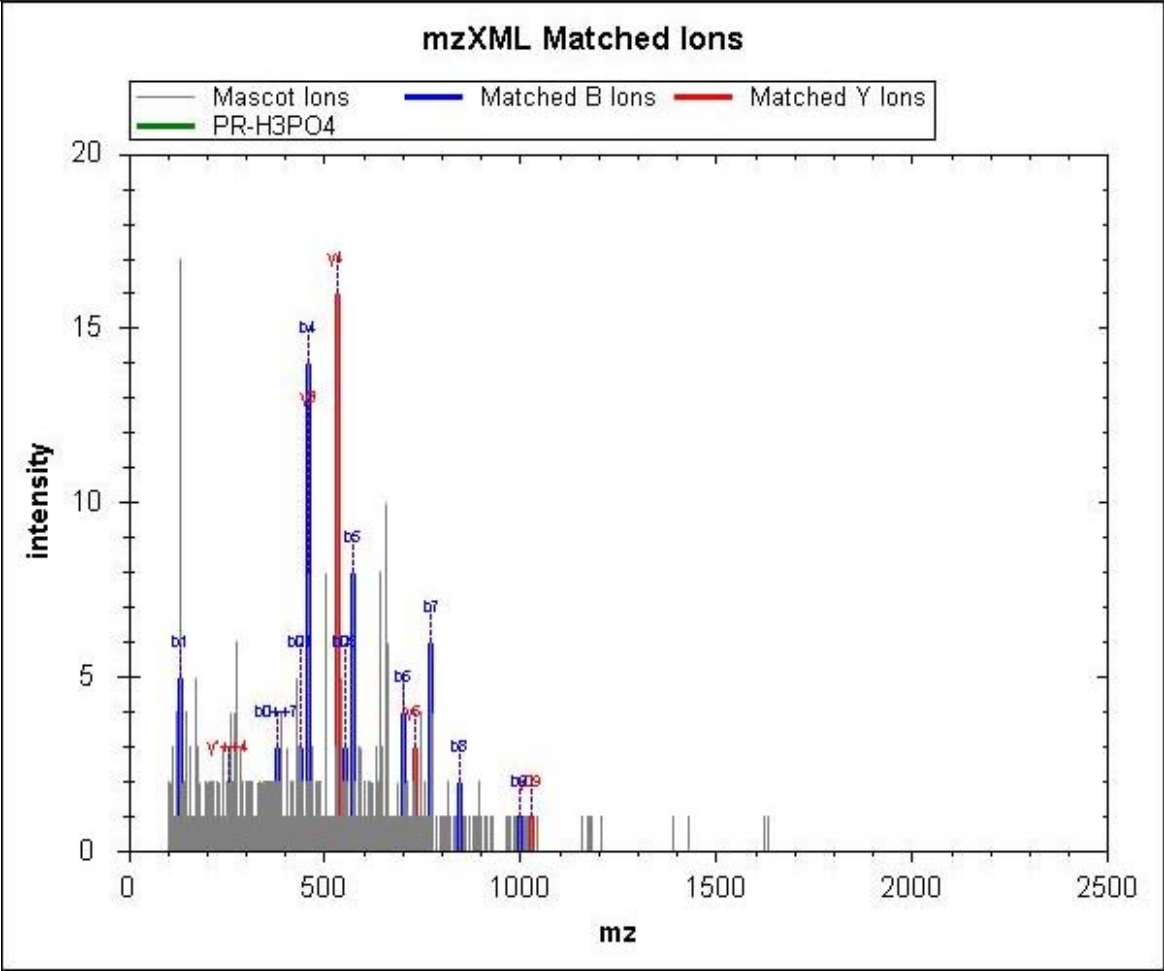

Protein index=1405, ACC No: IPI00000495

Peptide index=5114 MS/MS spectrum

Sequence: ALKDPNAFLFDHLLTLKPVK, m/z:570.8294, charge:+ 4, Modification: , Mod Position:

Score: 37.56, Raw data:WET\_B4\_090616\_03.mzxml, MS/MS Elution time: 69.53783, Scan number:3833, Mass delta:-0.0155, Rank:1

| No | b       | b++     | b*      | b*++    | b0      | b0++    | Seq | y       | y++     | y*      | y*++    | y0      | y0++    | RevNo |
|----|---------|---------|---------|---------|---------|---------|-----|---------|---------|---------|---------|---------|---------|-------|
| 1  | 72.04   | 36.53   |         |         |         |         | A   |         |         |         |         |         |         | 20    |
| 2  | 185.13  | 93.07   |         |         |         |         | L   | 2209.27 | 1105.14 | 2192.25 | 1096.63 | 2191.26 | 1096.14 | 19    |
| 3  | 313.22  | 157.12  | 296.2   | 148.6   |         |         | K   | 2096.19 | 1048.6  | 2079.16 | 1040.09 | 2078.18 | 1039.59 | 18    |
| 4  | 428.25  | 214.63  | 411.22  | 206.12  | 410.24  | 205.62  | D   | 1968.1  | 984.55  | 1951.07 | 976.04  | 1950.08 | 975.55  | 17    |
| 5  | 525.3   | 263.16  | 508.28  | 254.64  | 507.29  | 254.15  | P   | 1853.07 | 927.04  | 1836.04 | 918.52  | 1835.06 | 918.03  | 16    |
| 6  | 639.35  | 320.18  | 622.32  | 311.66  | 621.34  | 311.17  | N   | 1756.02 | 878.51  | 1738.99 | 870     | 1738.01 | 869.51  | 15    |
| 7  | 710.38  | 355.7   | 693.36  | 347.18  | 692.37  | 346.69  | A   | 1641.97 | 821.49  | 1624.95 | 812.98  | 1623.96 | 812.48  | 14    |
| 8  | 857.45  | 429.23  | 840.42  | 420.72  | 839.44  | 420.22  | F   | 1570.94 | 785.97  | 1553.91 | 777.46  | 1552.92 | 776.97  | 13    |
| 9  | 970.54  | 485.77  | 953.51  | 477.26  | 952.53  | 476.77  | L   | 1423.87 | 712.44  | 1406.84 | 703.92  | 1405.86 | 703.43  | 12    |
| 10 | 1117.6  | 559.31  | 1100.58 | 550.79  | 1099.59 | 550.3   | F   | 1310.78 | 655.9   | 1293.76 | 647.38  | 1292.77 | 646.89  | 11    |
| 11 | 1232.63 | 616.82  | 1215.6  | 608.31  | 1214.62 | 607.81  | D   | 1163.71 | 582.36  | 1146.69 | 573.85  | 1145.7  | 573.36  | 10    |
| 12 | 1369.69 | 685.35  | 1352.66 | 676.84  | 1351.68 | 676.34  | H   | 1048.69 | 524.85  | 1031.66 | 516.33  | 1030.68 | 515.84  | 9     |
| 13 | 1482.77 | 741.89  | 1465.75 | 733.38  | 1464.76 | 732.89  | L   | 911.63  | 456.32  | 894.6   | 447.8   | 893.62  | 447.31  | 8     |
| 14 | 1595.86 | 798.43  | 1578.83 | 789.92  | 1577.85 | 789.43  | L   | 798.54  | 399.78  | 781.52  | 391.26  | 780.53  | 390.77  | 7     |
| 15 | 1696.91 | 848.96  | 1679.88 | 840.44  | 1678.9  | 839.95  | T   | 685.46  | 343.23  | 668.43  | 334.72  | 667.45  | 334.23  | 6     |
| 16 | 1809.99 | 905.5   | 1792.96 | 896.99  | 1791.98 | 896.49  | L   | 584.41  | 292.71  | 567.39  | 284.2   |         |         | 5     |
| 17 | 1938.08 | 969.55  | 1921.06 | 961.03  | 1920.07 | 960.54  | K   | 471.33  | 236.17  | 454.3   | 227.65  |         |         | 4     |
| 18 | 2035.14 | 1018.07 | 2018.11 | 1009.56 | 2017.13 | 1009.07 | P   | 343.23  | 172.12  | 326.21  | 163.61  |         |         | 3     |
| 19 | 2134.21 | 1067.61 | 2117.18 | 1059.09 | 2116.2  | 1058.6  | V   | 246.18  | 123.59  | 229.15  | 115.08  |         |         | 2     |
| 20 |         |         |         |         |         |         | K   | 147.11  | 74.06   | 130.09  | 65.55   |         |         | 1     |



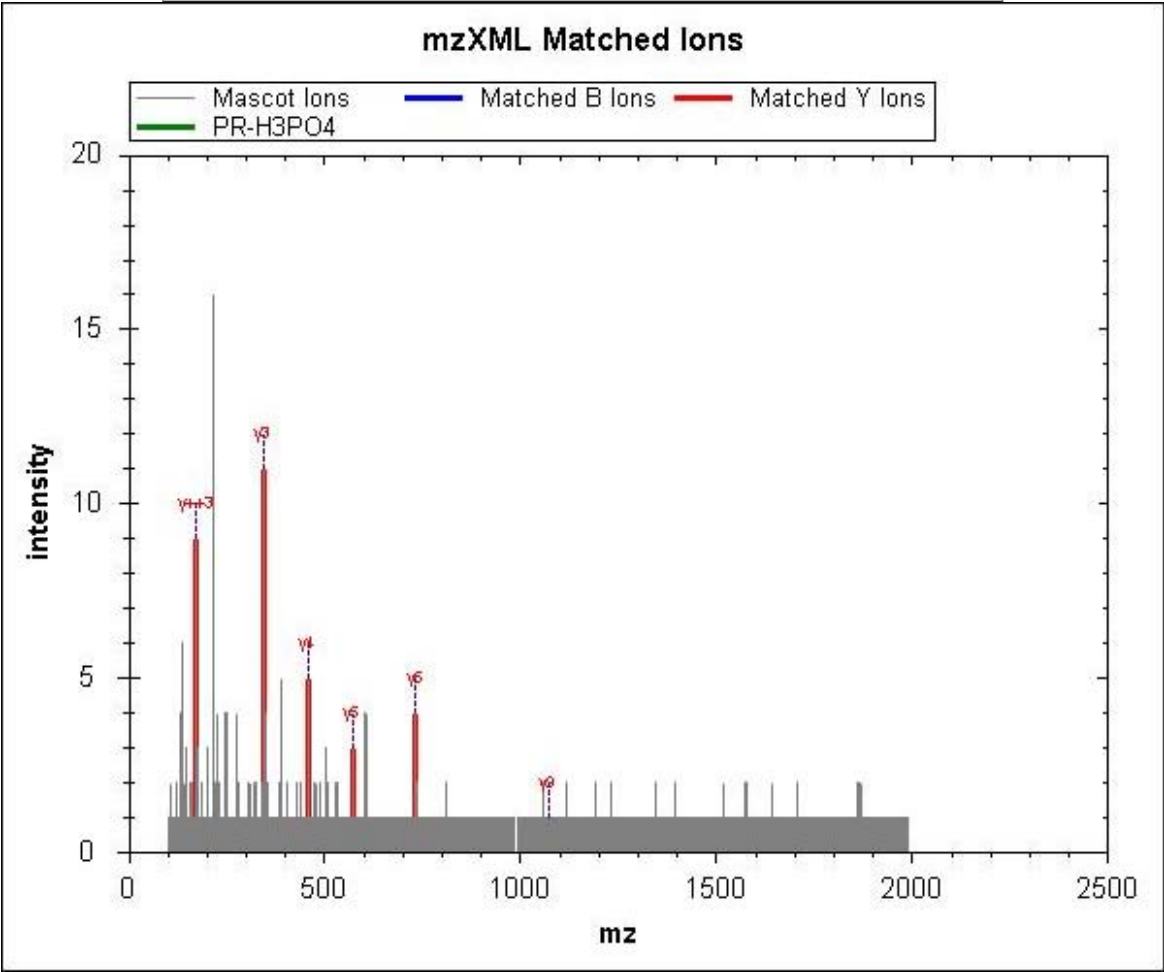

Protein index=1407, ACC No:IPI00106642

Peptide index=409 MS/MS spectrum

Sequence: GQHEVHGMPSANTHNTWK, m/z:508.4798, charge:+ 4, Modification: , Mod Position:

Score: 34.76, Raw data:WET\_B5\_090616\_02.mzxml, MS/MS Elution time: 19.33233, Scan number:890, Mass delta:-0.027, Rank:1

| No | b       | b++    | b*      | b*++   | b0      | b0++   | Seq | y       | y++    | y*      | y*++   | y0      | y0++   | RevNo |
|----|---------|--------|---------|--------|---------|--------|-----|---------|--------|---------|--------|---------|--------|-------|
| 1  | 58.03   | 29.52  |         |        |         |        | G   |         |        |         |        |         |        | 18    |
| 2  | 186.09  | 93.55  | 169.06  | 85.03  |         |        | Q   | 1973.9  | 987.46 | 1956.88 | 978.94 | 1955.89 | 978.45 | 17    |
| 3  | 323.15  | 162.08 | 306.12  | 153.56 |         |        | H   | 1845.84 | 923.43 | 1828.82 | 914.91 | 1827.83 | 914.42 | 16    |
| 4  | 452.19  | 226.6  | 435.16  | 218.08 | 434.18  | 217.59 | E   | 1708.79 | 854.9  | 1691.76 | 846.38 | 1690.78 | 845.89 | 15    |
| 5  | 551.26  | 276.13 | 534.23  | 267.62 | 533.25  | 267.13 | V   | 1579.74 | 790.38 | 1562.72 | 781.86 | 1561.73 | 781.37 | 14    |
| 6  | 688.32  | 344.66 | 671.29  | 336.15 | 670.31  | 335.66 | H   | 1480.67 | 740.84 | 1463.65 | 732.33 | 1462.66 | 731.84 | 13    |
| 7  | 745.34  | 373.17 | 728.31  | 364.66 | 727.33  | 364.17 | G   | 1343.62 | 672.31 | 1326.59 | 663.8  | 1325.61 | 663.31 | 12    |
| 8  | 876.38  | 438.69 | 859.35  | 430.18 | 858.37  | 429.69 | M   | 1286.59 | 643.8  | 1269.57 | 635.29 | 1268.58 | 634.8  | 11    |
| 9  | 973.43  | 487.22 | 956.4   | 478.71 | 955.42  | 478.21 | P   | 1155.55 | 578.28 | 1138.53 | 569.77 | 1137.54 | 569.28 | 10    |
| 10 | 1060.46 | 530.74 | 1043.44 | 522.22 | 1042.45 | 521.73 | S   | 1058.5  | 529.75 | 1041.47 | 521.24 | 1040.49 | 520.75 | 9     |
| 11 | 1131.5  | 566.25 | 1114.47 | 557.74 | 1113.49 | 557.25 | A   | 971.47  | 486.24 | 954.44  | 477.72 | 953.46  | 477.23 | 8     |
| 12 | 1245.54 | 623.28 | 1228.52 | 614.76 | 1227.53 | 614.27 | N   | 900.43  | 450.72 | 883.41  | 442.21 | 882.42  | 441.71 | 7     |

[illegible]

Peptide index=2207 MS/MS spectrum

Score: 55.36, Raw data:WET\_B5\_090616\_01.mzxml, MS/MS Elution time: 41.93233, Scan number:2209,  
Mass delta:-0.0013, Rank:1

[illegible]

|    |         |        |         |        |         |        |   |        |        |        |        |        |        |   |
|----|---------|--------|---------|--------|---------|--------|---|--------|--------|--------|--------|--------|--------|---|
| 7  | 653.4   | 327.2  | 636.37  | 318.69 |         |        | A | 666.39 | 333.7  | 649.37 | 325.19 | 648.38 | 324.7  | 6 |
| 8  | 750.45  | 375.73 | 733.42  | 367.22 |         |        | P | 595.36 | 298.18 | 578.33 | 289.67 | 577.35 | 289.18 | 5 |
| 9  | 887.51  | 444.26 | 870.48  | 435.75 |         |        | H | 498.3  | 249.66 | 481.28 | 241.14 | 480.29 | 240.65 | 4 |
| 10 | 988.56  | 494.78 | 971.53  | 486.27 | 970.55  | 485.78 | T | 361.24 | 181.13 | 344.22 | 172.61 | 343.23 | 172.12 | 3 |
| 11 | 1101.64 | 551.32 | 1084.62 | 542.81 | 1083.63 | 542.32 | L | 260.2  | 130.6  | 243.17 | 122.09 |        |        | 2 |
| 12 |         |        |         |        |         |        | K | 147.11 | 74.06  | 130.09 | 65.55  |        |        | 1 |

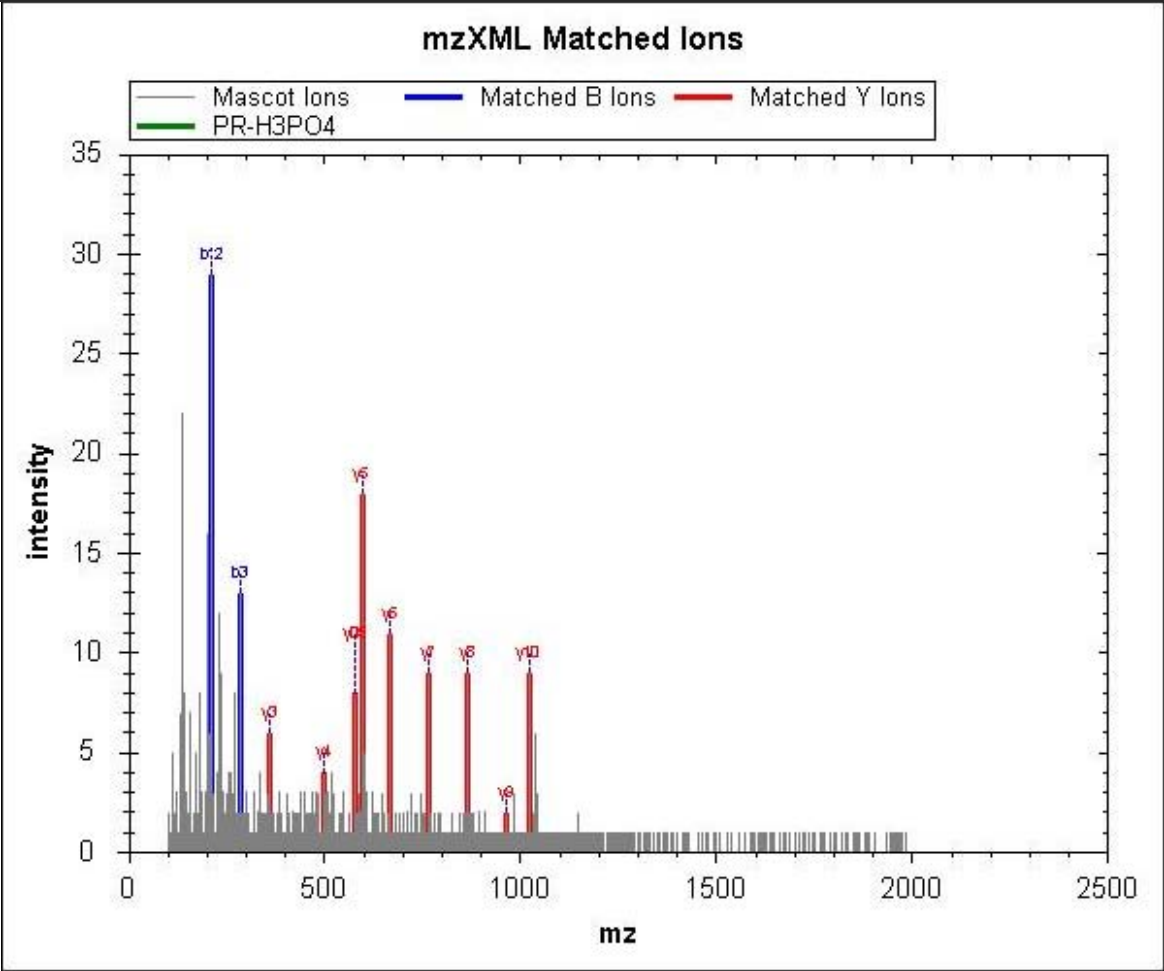

Protein index=1409, ACC No:IP100456722

Peptide index=704 MS/MS spectrum

Sequence: TLIVAWIK, m/z:472.2693, charge:+ 2, Modification: , Mod Position:

Score: 32.68, Raw data:WET\_B5\_090616\_02.mzxml, MS/MS Elution time: 23.1495, Scan number:1114, Mass delta:-0.0718, Rank:1

| No | b      | b++    | b0     | b0++   | Seq | y      | y++    | y*     | y*++   | RevNo |
|----|--------|--------|--------|--------|-----|--------|--------|--------|--------|-------|
| 1  | 102.05 | 51.53  | 84.04  | 42.53  | T   |        |        |        |        | 8     |
| 2  | 215.14 | 108.07 | 197.13 | 99.07  | L   | 842.55 | 421.78 | 825.52 | 413.27 | 7     |
| 3  | 328.22 | 164.62 | 310.21 | 155.61 | I   | 729.47 | 365.24 | 712.44 | 356.72 | 6     |
| 4  | 427.29 | 214.15 | 409.28 | 205.14 | V   | 616.38 | 308.69 | 599.36 | 300.18 | 5     |
| 5  | 498.33 | 249.67 | 480.32 | 240.66 | A   | 517.31 | 259.16 | 500.29 | 250.65 | 4     |
| 6  | 684.41 | 342.71 | 666.4  | 333.7  | W   | 446.28 | 223.64 | 429.25 | 215.13 | 3     |

|   |        |        |        |        |   |        |       |        |        |   |
|---|--------|--------|--------|--------|---|--------|-------|--------|--------|---|
| 7 | 797.49 | 399.25 | 779.48 | 390.24 | I | 260.2  | 130.6 | 243.17 | 122.09 | 2 |
| 8 |        |        |        |        | K | 147.11 | 74.06 | 130.09 | 65.55  | 1 |

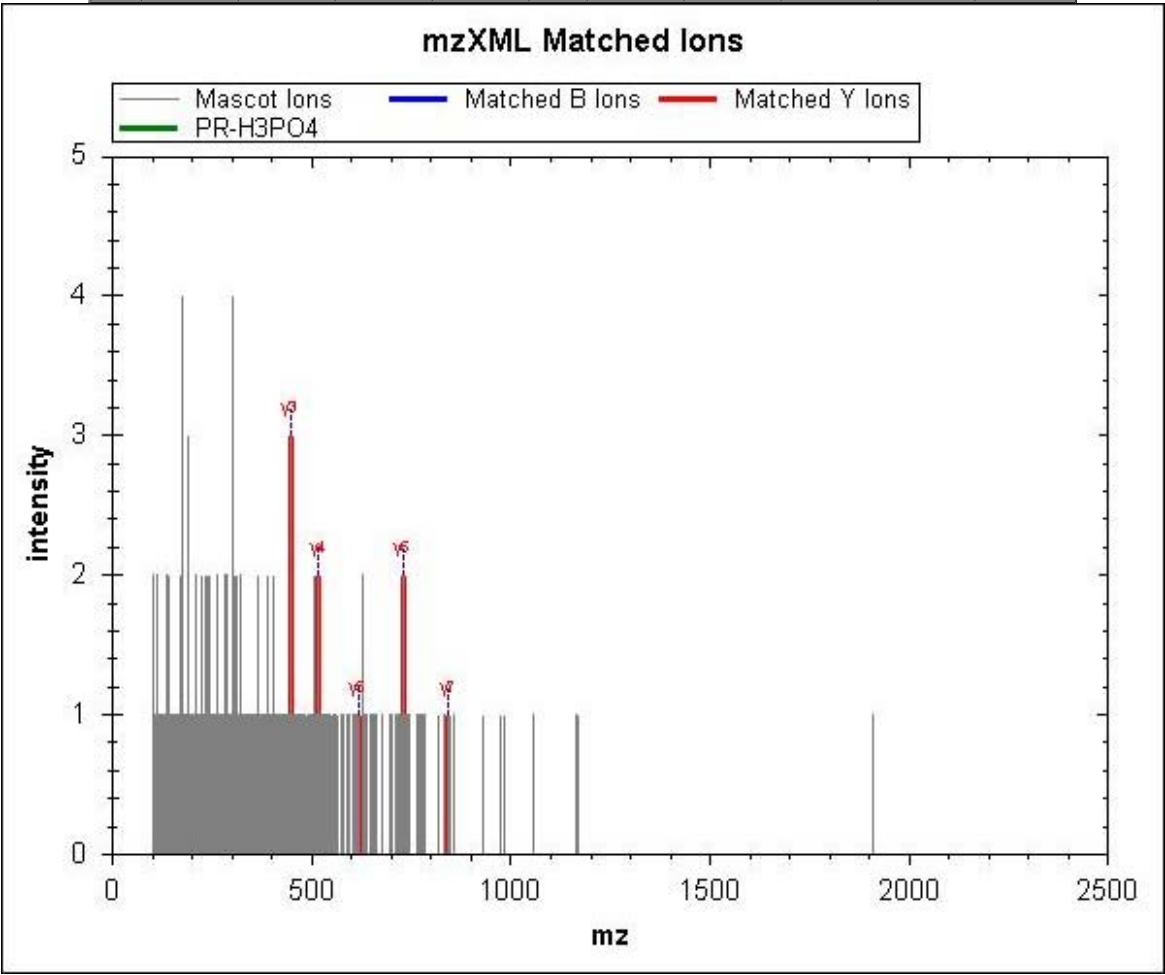

Protein index=1411, ACC No: IPI00167072

Peptide index=7060 MS/MS spectrum

Sequence: LLDGEAALPAVVFLHGLFGSK, m/z:718.7406, charge:+ 3, Modification: , Mod Position:

Score: 51.93, Raw data:WET\_B5\_090616\_02.mzxml, MS/MS Elution time: 105.0458, Scan number:5933, Mass delta:0.0008, Rank:1

| No | b      | b++    | b0     | b0++   | Seq | y       | y++     | y*      | y*++    | y0      | y0++    | RevNo |
|----|--------|--------|--------|--------|-----|---------|---------|---------|---------|---------|---------|-------|
| 1  | 114.09 | 57.55  |        |        | L   |         |         |         |         |         |         | 21    |
| 2  | 227.18 | 114.09 |        |        | L   | 2041.11 | 1021.06 | 2024.09 | 1012.55 | 2023.1  | 1012.05 | 20    |
| 3  | 342.2  | 171.6  | 324.19 | 162.6  | D   | 1928.03 | 964.52  | 1911    | 956     | 1910.02 | 955.51  | 19    |
| 4  | 399.22 | 200.12 | 381.21 | 191.11 | G   | 1813    | 907     | 1795.97 | 898.49  | 1794.99 | 898     | 18    |
| 5  | 528.27 | 264.64 | 510.26 | 255.63 | E   | 1755.98 | 878.49  | 1738.95 | 869.98  | 1737.97 | 869.49  | 17    |
| 6  | 599.3  | 300.16 | 581.29 | 291.15 | A   | 1626.94 | 813.97  | 1609.91 | 805.46  | 1608.93 | 804.97  | 16    |
| 7  | 670.34 | 335.67 | 652.33 | 326.67 | A   | 1555.9  | 778.45  | 1538.87 | 769.94  | 1537.89 | 769.45  | 15    |
| 8  | 783.42 | 392.22 | 765.41 | 383.21 | L   | 1484.86 | 742.93  | 1467.84 | 734.42  | 1466.85 | 733.93  | 14    |
| 9  | 880.48 | 440.74 | 862.47 | 431.74 | P   | 1371.78 | 686.39  | 1354.75 | 677.88  | 1353.77 | 677.39  | 13    |
| 10 | 951.51 | 476.26 | 933.5  | 467.26 | A   | 1274.73 | 637.87  | 1257.7  | 629.35  | 1256.71 | 628.86  | 12    |

|    |         |         |         |        |   |         |        |         |        |         |        |    |
|----|---------|---------|---------|--------|---|---------|--------|---------|--------|---------|--------|----|
| 11 | 1050.58 | 525.8   | 1032.57 | 516.79 | V | 1203.69 | 602.35 | 1186.66 | 593.83 | 1185.68 | 593.34 | 11 |
| 12 | 1149.65 | 575.33  | 1131.64 | 566.32 | V | 1104.62 | 552.81 | 1087.59 | 544.3  | 1086.61 | 543.81 | 10 |
| 13 | 1296.72 | 648.86  | 1278.71 | 639.86 | F | 1005.55 | 503.28 | 988.53  | 494.77 | 987.54  | 494.27 | 9  |
| 14 | 1409.8  | 705.41  | 1391.79 | 696.4  | L | 858.48  | 429.75 | 841.46  | 421.23 | 840.47  | 420.74 | 8  |
| 15 | 1546.86 | 773.94  | 1528.85 | 764.93 | H | 745.4   | 373.2  | 728.37  | 364.69 | 727.39  | 364.2  | 7  |
| 16 | 1603.88 | 802.45  | 1585.87 | 793.44 | G | 608.34  | 304.67 | 591.31  | 296.16 | 590.33  | 295.67 | 6  |
| 17 | 1716.97 | 858.99  | 1698.96 | 849.98 | L | 551.32  | 276.16 | 534.29  | 267.65 | 533.31  | 267.16 | 5  |
| 18 | 1864.04 | 932.52  | 1846.03 | 923.52 | F | 438.23  | 219.62 | 421.21  | 211.11 | 420.22  | 210.62 | 4  |
| 19 | 1921.06 | 961.03  | 1903.05 | 952.03 | G | 291.17  | 146.09 | 274.14  | 137.57 | 273.16  | 137.08 | 3  |
| 20 | 2008.09 | 1004.55 | 1990.08 | 995.54 | S | 234.14  | 117.58 | 217.12  | 109.06 | 216.13  | 108.57 | 2  |
| 21 |         |         |         |        | K | 147.11  | 74.06  | 130.09  | 65.55  |         |        | 1  |

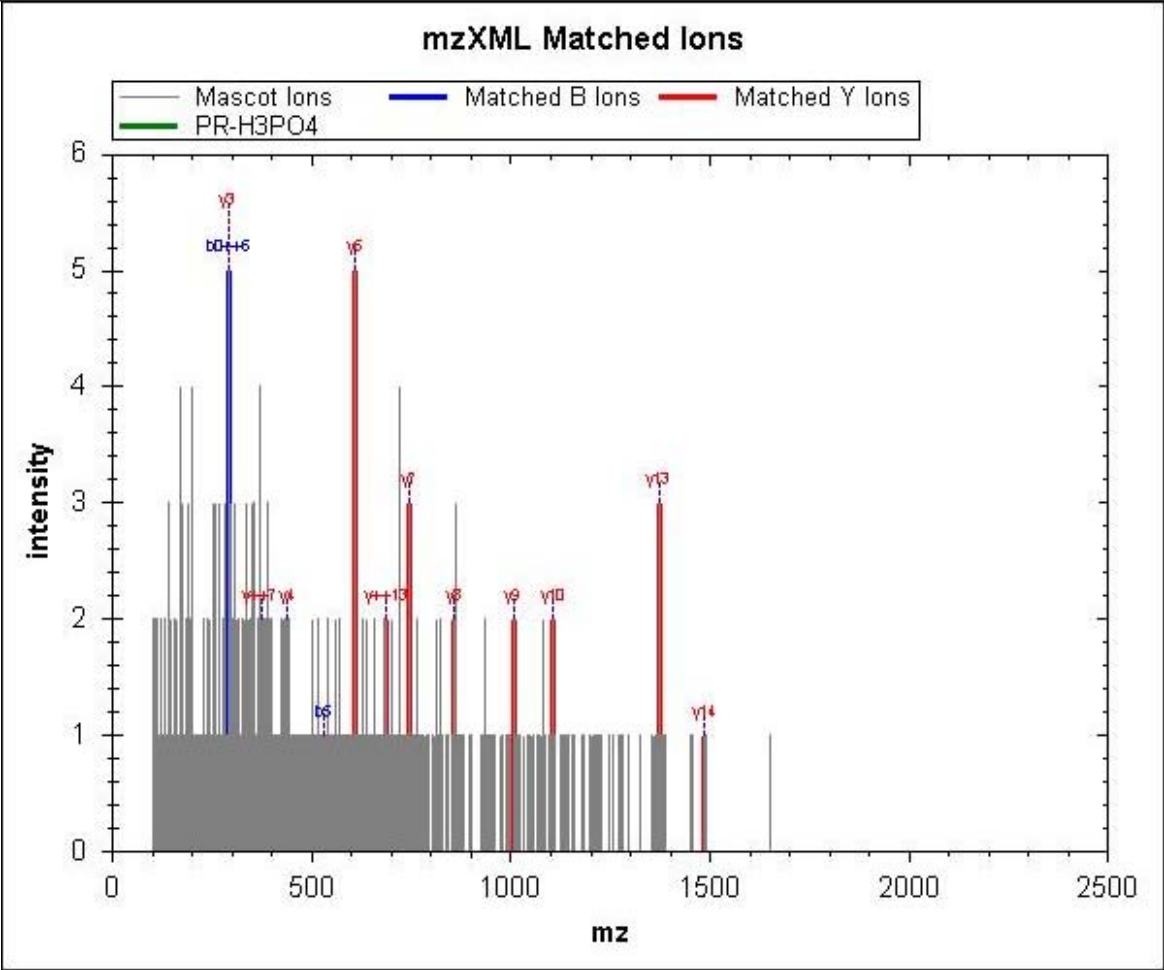

Protein index=1412, ACC No: IPI00012503

Peptide index=6981 MS/MS spectrum

Sequence: EIVDSYLPVILDIK, m/z:865.5012, charge:+ 2, Modification: , Mod Position:

Score: 62.31, Raw data:WET\_B5\_090616\_01.mzxml, MS/MS Elution time: 102.8552, Scan number:5757, Mass delta:-0.0036, Rank:1

| No | b      | b++   | b0     | b0++  | Seq | y | y++ | y* | y*++ | y0 | y0++ | RevNo |
|----|--------|-------|--------|-------|-----|---|-----|----|------|----|------|-------|
| 1  | 130.05 | 65.53 | 112.04 | 56.52 | E   |   |     |    |      |    |      | 15    |

|    |         |        |         |        |   |         |        |         |        |         |        |    |
|----|---------|--------|---------|--------|---|---------|--------|---------|--------|---------|--------|----|
| 2  | 243.13  | 122.07 | 225.12  | 113.07 | I | 1600.96 | 800.98 | 1583.93 | 792.47 | 1582.95 | 791.98 | 14 |
| 3  | 342.2   | 171.6  | 324.19  | 162.6  | V | 1487.87 | 744.44 | 1470.85 | 735.93 | 1469.86 | 735.43 | 13 |
| 4  | 457.23  | 229.12 | 439.22  | 220.11 | D | 1388.8  | 694.91 | 1371.78 | 686.39 | 1370.79 | 685.9  | 12 |
| 5  | 544.26  | 272.63 | 526.25  | 263.63 | S | 1273.78 | 637.39 | 1256.75 | 628.88 | 1255.77 | 628.39 | 11 |
| 6  | 707.32  | 354.17 | 689.31  | 345.16 | Y | 1186.74 | 593.88 | 1169.72 | 585.36 | 1168.73 | 584.87 | 10 |
| 7  | 820.41  | 410.71 | 802.4   | 401.7  | L | 1023.68 | 512.34 | 1006.65 | 503.83 | 1005.67 | 503.34 | 9  |
| 8  | 917.46  | 459.23 | 899.45  | 450.23 | P | 910.6   | 455.8  | 893.57  | 447.29 | 892.59  | 446.8  | 8  |
| 9  | 1016.53 | 508.77 | 998.52  | 499.76 | V | 813.54  | 407.28 | 796.52  | 398.76 | 795.53  | 398.27 | 7  |
| 10 | 1129.61 | 565.31 | 1111.6  | 556.31 | I | 714.48  | 357.74 | 697.45  | 349.23 | 696.47  | 348.74 | 6  |
| 11 | 1242.7  | 621.85 | 1224.69 | 612.85 | L | 601.39  | 301.2  | 584.37  | 292.69 | 583.38  | 292.19 | 5  |
| 12 | 1357.73 | 679.37 | 1339.71 | 670.36 | D | 488.31  | 244.66 | 471.28  | 236.14 | 470.3   | 235.65 | 4  |
| 13 | 1470.81 | 735.91 | 1452.8  | 726.9  | I | 373.28  | 187.14 | 356.25  | 178.63 |         |        | 3  |
| 14 | 1583.89 | 792.45 | 1565.88 | 783.45 | I | 260.2   | 130.6  | 243.17  | 122.09 |         |        | 2  |
| 15 |         |        |         |        | K | 147.11  | 74.06  | 130.09  | 65.55  |         |        | 1  |

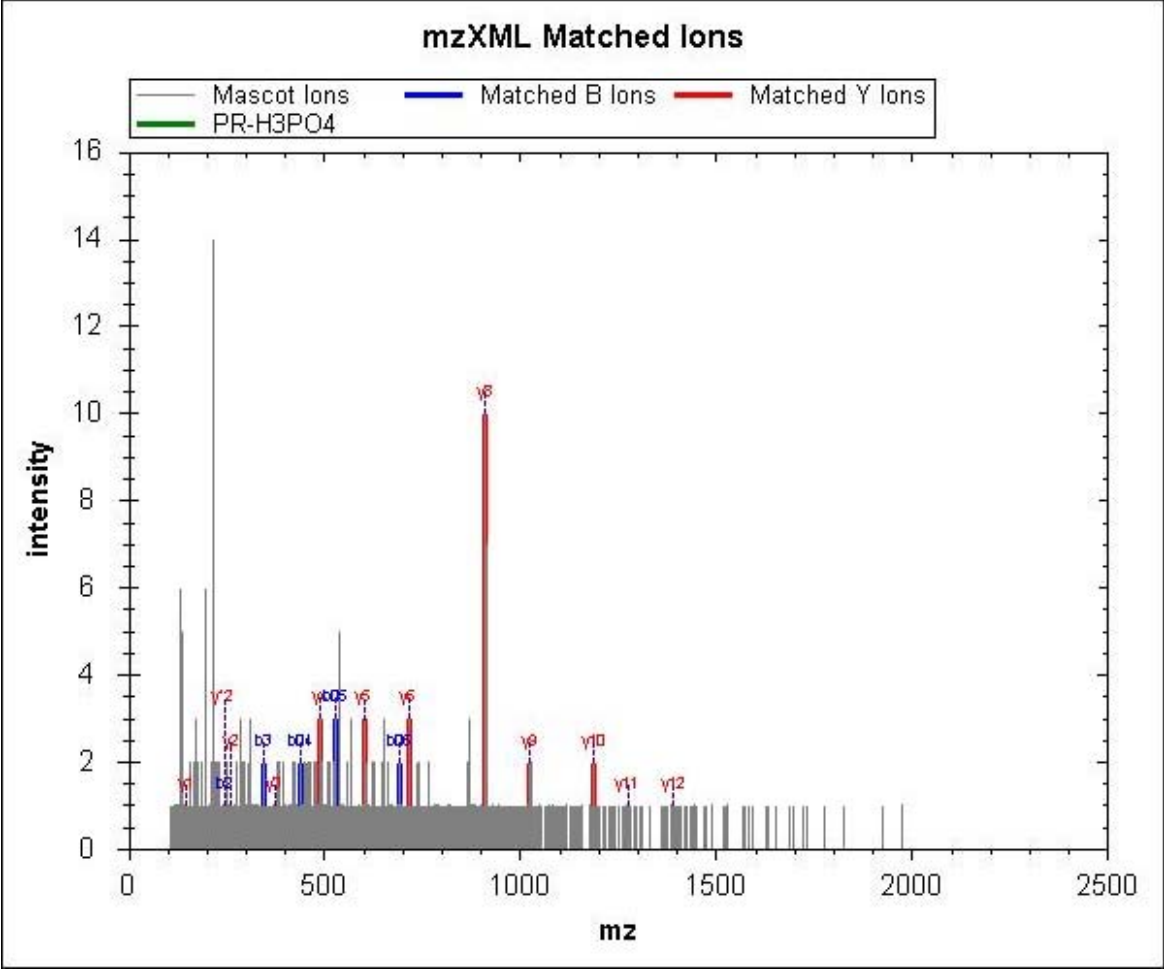

Protein index=1414, ACC No:IP100010105

Peptide index=719 MS/MS spectrum

Sequence: LNEAQPSTIATSMR, m/z:767.8845, charge:+ 2, Modification: Oxidation (M), Mod Position: 0.00000000000010.0

Score: 42.58, Raw data:WET\_B5\_090616\_01.mzxml, MS/MS Elution time: 23.17983, Scan number:1116,

Mass delta:0.0088, Rank:1

| No | b       | b++    | b*      | b*++   | b0      | b0++   | Seq | y       | y++    | y*      | y*++   | y0      | y0++   | RevNo |
|----|---------|--------|---------|--------|---------|--------|-----|---------|--------|---------|--------|---------|--------|-------|
| 1  | 114.09  | 57.55  |         |        |         |        | L   |         |        |         |        |         |        | 14    |
| 2  | 228.13  | 114.57 | 211.11  | 106.06 |         |        | N   | 1421.67 | 711.34 | 1404.64 | 702.82 | 1403.66 | 702.33 | 13    |
| 3  | 357.18  | 179.09 | 340.15  | 170.58 | 339.17  | 170.09 | E   | 1307.63 | 654.32 | 1290.6  | 645.8  | 1289.62 | 645.31 | 12    |
| 4  | 428.21  | 214.61 | 411.19  | 206.1  | 410.2   | 205.61 | A   | 1178.58 | 589.8  | 1161.56 | 581.28 | 1160.57 | 580.79 | 11    |
| 5  | 556.27  | 278.64 | 539.25  | 270.13 | 538.26  | 269.63 | Q   | 1107.55 | 554.28 | 1090.52 | 545.76 | 1089.54 | 545.27 | 10    |
| 6  | 653.33  | 327.17 | 636.3   | 318.65 | 635.31  | 318.16 | P   | 979.49  | 490.25 | 962.46  | 481.73 | 961.48  | 481.24 | 9     |
| 7  | 740.36  | 370.68 | 723.33  | 362.17 | 722.35  | 361.68 | S   | 882.43  | 441.72 | 865.41  | 433.21 | 864.42  | 432.72 | 8     |
| 8  | 841.4   | 421.21 | 824.38  | 412.69 | 823.39  | 412.2  | T   | 795.4   | 398.21 | 778.38  | 389.69 | 777.39  | 389.2  | 7     |
| 9  | 954.49  | 477.75 | 937.46  | 469.23 | 936.48  | 468.74 | I   | 694.36  | 347.68 | 677.33  | 339.17 | 676.34  | 338.68 | 6     |
| 10 | 1025.53 | 513.27 | 1008.5  | 504.75 | 1007.52 | 504.26 | A   | 581.27  | 291.14 | 564.24  | 282.63 | 563.26  | 282.13 | 5     |
| 11 | 1126.57 | 563.79 | 1109.55 | 555.28 | 1108.56 | 554.79 | T   | 510.23  | 255.62 | 493.21  | 247.11 | 492.22  | 246.62 | 4     |
| 12 | 1213.61 | 607.31 | 1196.58 | 598.79 | 1195.6  | 598.3  | S   | 409.19  | 205.1  | 392.16  | 196.58 | 391.18  | 196.09 | 3     |
| 13 | 1360.64 | 680.82 | 1343.61 | 672.31 | 1342.63 | 671.82 | M   | 322.15  | 161.58 | 305.13  | 153.07 |         |        | 2     |
| 14 |         |        |         |        |         |        | R   | 175.12  | 88.06  | 158.09  | 79.55  |         |        | 1     |

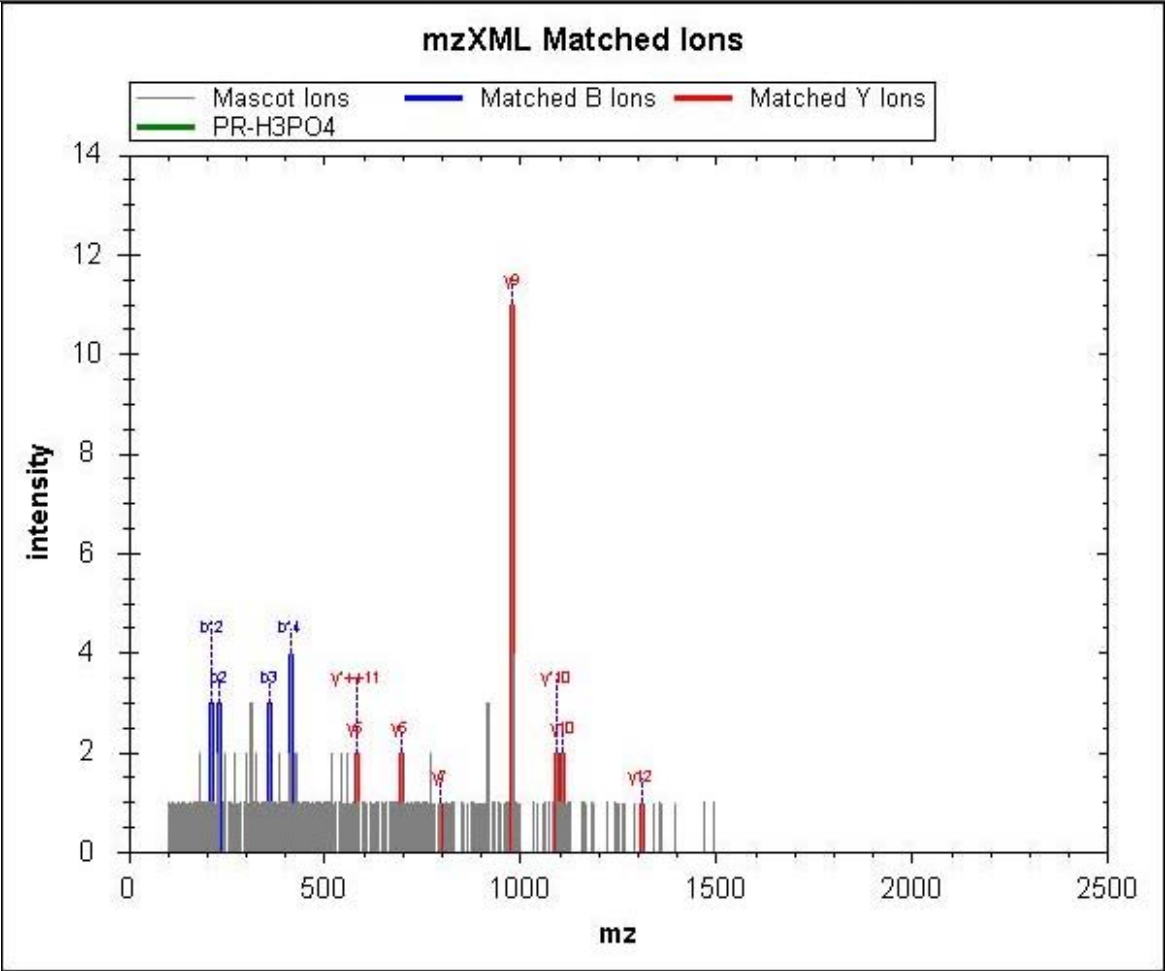

Protein index=1415, ACC No:IP100024175

Peptide index=6386 MS/MS spectrum

Sequence: RPFGISALIVGFDFDGTTPR, m/z:689.0375, charge:+ 3, Modification: , Mod Position:

Score: 32.39, Raw data:WET\_B5\_090616\_01.mzxml, MS/MS Elution time: 87.32384, Scan number:4845, Mass delta:0.0114, Rank:1

| No | b       | b++    | b*      | b*++   | b0      | b0++   | Seq | y       | y++    | y*      | y*++   | y0      | y0++   | RevNo |
|----|---------|--------|---------|--------|---------|--------|-----|---------|--------|---------|--------|---------|--------|-------|
| 1  | 157.11  | 79.06  | 140.08  | 70.54  |         |        | R   |         |        |         |        |         |        | 19    |
| 2  | 254.16  | 127.58 | 237.13  | 119.07 |         |        | P   | 1908.99 | 955    | 1891.96 | 946.48 | 1890.97 | 945.99 | 18    |
| 3  | 401.23  | 201.12 | 384.2   | 192.61 |         |        | F   | 1811.93 | 906.47 | 1794.91 | 897.96 | 1793.92 | 897.46 | 17    |
| 4  | 458.25  | 229.63 | 441.22  | 221.12 |         |        | G   | 1664.86 | 832.94 | 1647.84 | 824.42 | 1646.85 | 823.93 | 16    |
| 5  | 571.34  | 286.17 | 554.31  | 277.66 |         |        | I   | 1607.84 | 804.43 | 1590.82 | 795.91 | 1589.83 | 795.42 | 15    |
| 6  | 658.37  | 329.69 | 641.34  | 321.17 | 640.36  | 320.68 | S   | 1494.76 | 747.88 | 1477.73 | 739.37 | 1476.75 | 738.88 | 14    |
| 7  | 729.4   | 365.21 | 712.38  | 356.69 | 711.39  | 356.2  | A   | 1407.73 | 704.37 | 1390.7  | 695.85 | 1389.72 | 695.36 | 13    |
| 8  | 842.49  | 421.75 | 825.46  | 413.23 | 824.48  | 412.74 | L   | 1336.69 | 668.85 | 1319.66 | 660.34 | 1318.68 | 659.84 | 12    |
| 9  | 955.57  | 478.29 | 938.55  | 469.78 | 937.56  | 469.28 | I   | 1223.61 | 612.31 | 1206.58 | 603.79 | 1205.59 | 603.3  | 11    |
| 10 | 1054.64 | 527.82 | 1037.61 | 519.31 | 1036.63 | 518.82 | V   | 1110.52 | 555.76 | 1093.49 | 547.25 | 1092.51 | 546.76 | 10    |
| 11 | 1111.66 | 556.33 | 1094.64 | 547.82 | 1093.65 | 547.33 | G   | 1011.45 | 506.23 | 994.43  | 497.72 | 993.44  | 497.22 | 9     |
| 12 | 1258.73 | 629.87 | 1241.7  | 621.36 | 1240.72 | 620.86 | F   | 954.43  | 477.72 | 937.4   | 469.21 | 936.42  | 468.71 | 8     |
| 13 | 1373.76 | 687.38 | 1356.73 | 678.87 | 1355.75 | 678.38 | D   | 807.36  | 404.19 | 790.34  | 395.67 | 789.35  | 395.18 | 7     |
| 14 | 1520.83 | 760.92 | 1503.8  | 752.4  | 1502.82 | 751.91 | F   | 692.34  | 346.67 | 675.31  | 338.16 | 674.33  | 337.67 | 6     |
| 15 | 1635.85 | 818.43 | 1618.83 | 809.92 | 1617.84 | 809.42 | D   | 545.27  | 273.14 | 528.24  | 264.62 | 527.26  | 264.13 | 5     |
| 16 | 1692.87 | 846.94 | 1675.85 | 838.43 | 1674.86 | 837.94 | G   | 430.24  | 215.62 | 413.21  | 207.11 | 412.23  | 206.62 | 4     |
| 17 | 1793.92 | 897.46 | 1776.9  | 888.95 | 1775.91 | 888.46 | T   | 373.22  | 187.11 | 356.19  | 178.6  | 355.21  | 178.11 | 3     |
| 18 | 1890.98 | 945.99 | 1873.95 | 937.48 | 1872.96 | 936.99 | P   | 272.17  | 136.59 | 255.15  | 128.08 |         |        | 2     |
| 19 |         |        |         |        |         |        | R   | 175.12  | 88.06  | 158.09  | 79.55  |         |        | 1     |



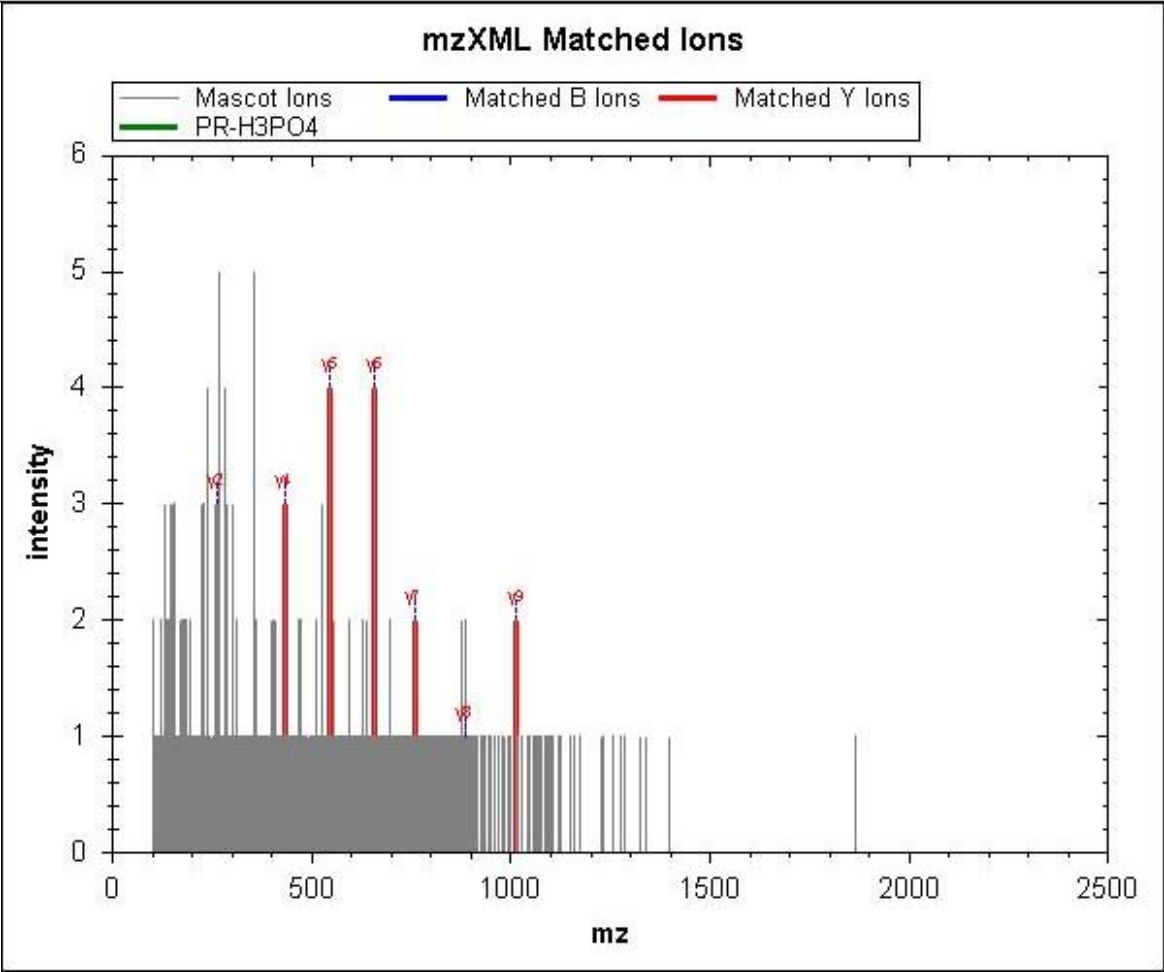

Protein index=1417, ACC No: IPI00003309

Peptide index=2029 MS/MS spectrum

Sequence: LQGDANNLHGFVDSR, m/z:591.2825, charge:+ 3, Modification: , Mod Position:

Score: 53.29, Raw data:WET\_B5\_090616\_01.mzxml, MS/MS Elution time: 40.09566, Scan number:2102, Mass delta:-0.0029, Rank:1

| No | b       | b++    | b*      | b*++   | b0      | b0++   | Seq | y       | y++    | y*      | y*++   | y0      | y0++   | RevNo |
|----|---------|--------|---------|--------|---------|--------|-----|---------|--------|---------|--------|---------|--------|-------|
| 1  | 114.09  | 57.55  |         |        |         |        | L   |         |        |         |        |         |        | 16    |
| 2  | 242.15  | 121.58 | 225.12  | 113.07 |         |        | Q   | 1658.75 | 829.88 | 1641.73 | 821.37 | 1640.74 | 820.87 | 15    |
| 3  | 299.17  | 150.09 | 282.14  | 141.58 |         |        | G   | 1530.69 | 765.85 | 1513.67 | 757.34 | 1512.68 | 756.84 | 14    |
| 4  | 414.2   | 207.6  | 397.17  | 199.09 | 396.19  | 198.6  | D   | 1473.67 | 737.34 | 1456.65 | 728.83 | 1455.66 | 728.33 | 13    |
| 5  | 485.24  | 243.12 | 468.21  | 234.61 | 467.22  | 234.12 | A   | 1358.64 | 679.83 | 1341.62 | 671.31 | 1340.63 | 670.82 | 12    |
| 6  | 599.28  | 300.14 | 582.25  | 291.63 | 581.27  | 291.14 | N   | 1287.61 | 644.31 | 1270.58 | 635.79 | 1269.6  | 635.3  | 11    |
| 7  | 713.32  | 357.16 | 696.29  | 348.65 | 695.31  | 348.16 | N   | 1173.56 | 587.29 | 1156.54 | 578.77 | 1155.55 | 578.28 | 10    |
| 8  | 826.41  | 413.71 | 809.38  | 405.19 | 808.39  | 404.7  | L   | 1059.52 | 530.26 | 1042.5  | 521.75 | 1041.51 | 521.26 | 9     |
| 9  | 963.46  | 482.24 | 946.44  | 473.72 | 945.45  | 473.23 | H   | 946.44  | 473.72 | 929.41  | 465.21 | 928.43  | 464.72 | 8     |
| 10 | 1020.49 | 510.75 | 1003.46 | 502.23 | 1002.48 | 501.74 | G   | 809.38  | 405.19 | 792.35  | 396.68 | 791.37  | 396.19 | 7     |
| 11 | 1167.55 | 584.28 | 1150.53 | 575.77 | 1149.54 | 575.28 | F   | 752.36  | 376.68 | 735.33  | 368.17 | 734.35  | 367.68 | 6     |
| 12 | 1296.6  | 648.8  | 1279.57 | 640.29 | 1278.59 | 639.8  | E   | 605.29  | 303.15 | 588.26  | 294.63 | 587.28  | 294.14 | 5     |

|    |         |        |         |        |         |        |   |        |        |        |        |        |        |   |
|----|---------|--------|---------|--------|---------|--------|---|--------|--------|--------|--------|--------|--------|---|
| 13 | 1395.67 | 698.34 | 1378.64 | 689.82 | 1377.65 | 689.33 | V | 476.25 | 238.63 | 459.22 | 230.11 | 458.24 | 229.62 | 4 |
| 14 | 1510.69 | 755.85 | 1493.67 | 747.34 | 1492.68 | 746.84 | D | 377.18 | 189.09 | 360.15 | 180.58 | 359.17 | 180.09 | 3 |
| 15 | 1597.72 | 799.37 | 1580.7  | 790.85 | 1579.71 | 790.36 | S | 262.15 | 131.58 | 245.12 | 123.07 | 244.14 | 122.57 | 2 |
| 16 |         |        |         |        |         |        | R | 175.12 | 88.06  | 158.09 | 79.55  |        |        | 1 |

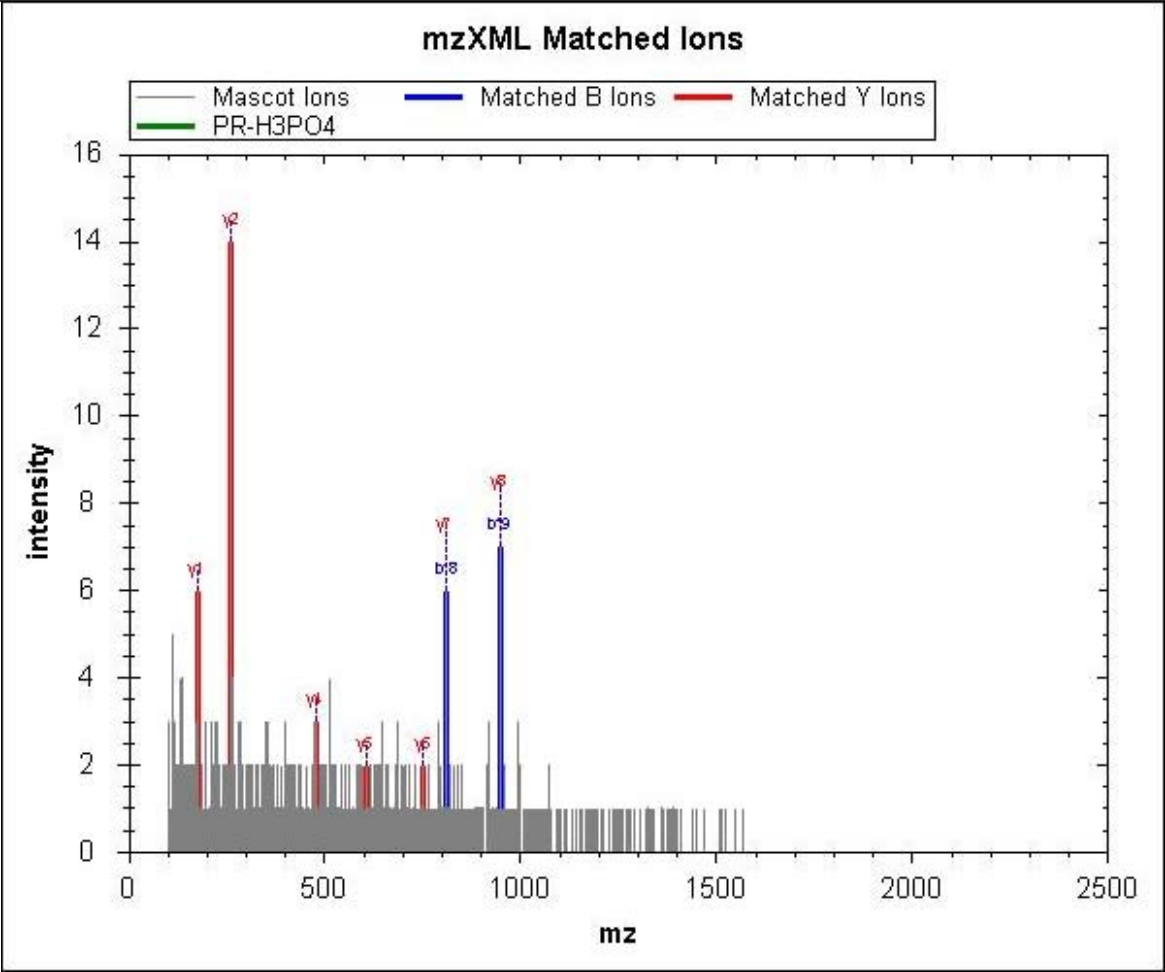

Protein index=1420, ACC No: IPI00100667

Peptide index=1195 MS/MS spectrum

Sequence: KPTEIEWR, m/z:529.7846, charge:+ 2, Modification: , Mod Position:

Score: 66.8, Raw data:WET\_B5\_090616\_03.mzxml, MS/MS Elution time: 30.3125, Scan number:1537, Mass delta:-0.0024, Rank:1

| No | b      | b++    | b*     | b*++   | b0     | b0++   | Seq | y      | y++    | y*     | y*++   | y0     | y0++   | RevNo |
|----|--------|--------|--------|--------|--------|--------|-----|--------|--------|--------|--------|--------|--------|-------|
| 1  | 129.1  | 65.05  | 112.08 | 56.54  |        |        | K   |        |        |        |        |        |        | 8     |
| 2  | 226.15 | 113.58 | 209.13 | 105.07 |        |        | P   | 930.47 | 465.74 | 913.44 | 457.22 | 912.46 | 456.73 | 7     |
| 3  | 327.2  | 164.1  | 310.18 | 155.59 | 309.19 | 155.1  | T   | 833.42 | 417.21 | 816.39 | 408.7  | 815.4  | 408.21 | 6     |
| 4  | 456.25 | 228.63 | 439.22 | 220.11 | 438.23 | 219.62 | E   | 732.37 | 366.69 | 715.34 | 358.17 | 714.36 | 357.68 | 5     |
| 5  | 569.33 | 285.17 | 552.3  | 276.65 | 551.32 | 276.16 | I   | 603.32 | 302.17 | 586.3  | 293.65 | 585.31 | 293.16 | 4     |
| 6  | 698.37 | 349.69 | 681.35 | 341.18 | 680.36 | 340.68 | E   | 490.24 | 245.62 | 473.21 | 237.11 | 472.23 | 236.62 | 3     |
| 7  | 884.45 | 442.73 | 867.42 | 434.22 | 866.44 | 433.72 | W   | 361.2  | 181.1  | 344.17 | 172.59 |        |        | 2     |
| 8  |        |        |        |        |        |        | R   | 175.12 | 88.06  | 158.09 | 79.55  |        |        | 1     |

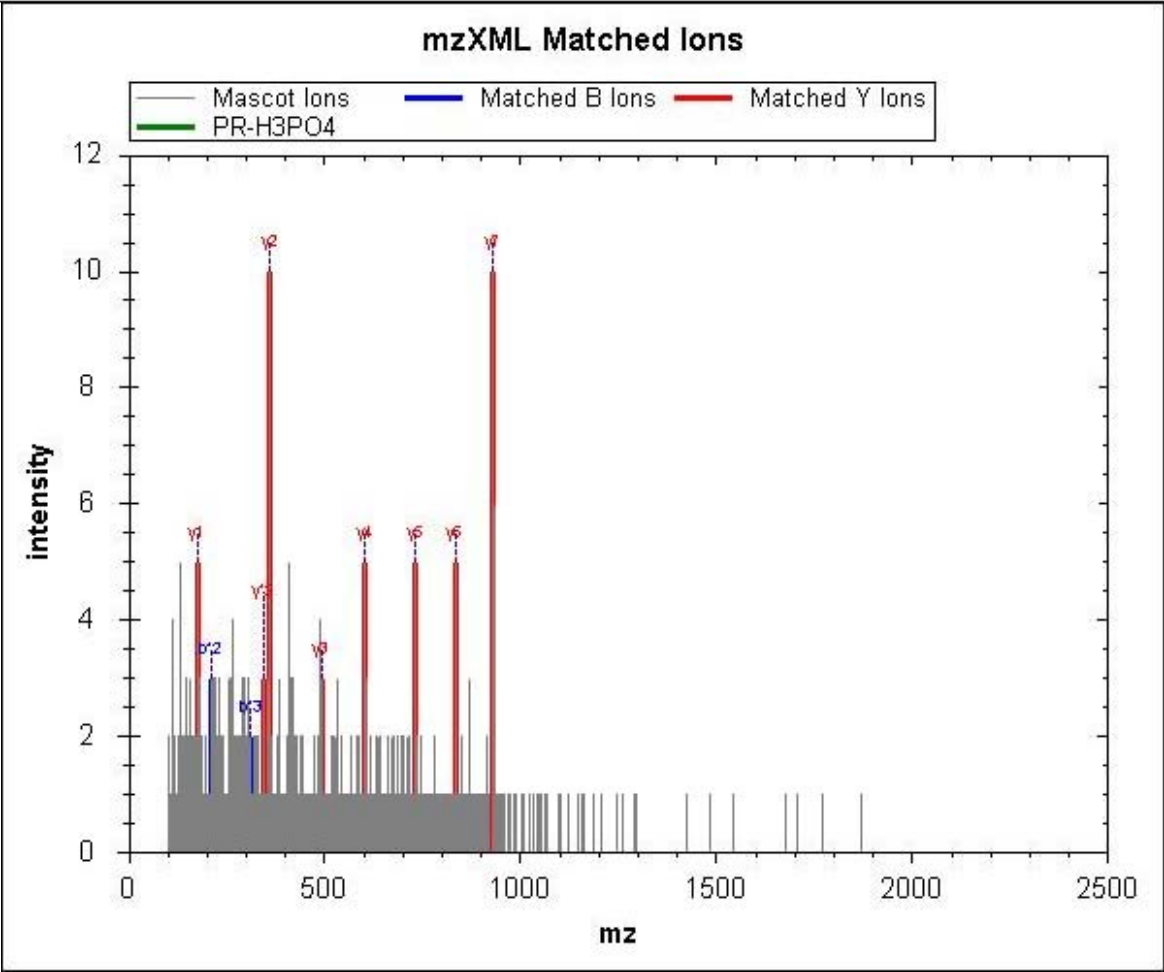

Protein index=1421, ACC No:IPI00303753

Peptide index=3791 MS/MS spectrum

Sequence: LVDYLEGIR, m/z:539.3025, charge:+ 2, Modification: , Mod Position:

Score: 66.07, Raw data:WET\_B5\_090616\_01.mzxml, MS/MS Elution time: 55.81817, Scan number:3015, Mass delta:0.0038, Rank:1

| No | b      | b++    | b0     | b0++   | Seq | y      | y++    | y*     | y*++   | y0     | y0++   | RevNo |
|----|--------|--------|--------|--------|-----|--------|--------|--------|--------|--------|--------|-------|
| 1  | 114.09 | 57.55  |        |        | L   |        |        |        |        |        |        | 9     |
| 2  | 213.16 | 107.08 |        |        | V   | 964.51 | 482.76 | 947.48 | 474.25 | 946.5  | 473.75 | 8     |
| 3  | 328.19 | 164.6  | 310.18 | 155.59 | D   | 865.44 | 433.22 | 848.41 | 424.71 | 847.43 | 424.22 | 7     |
| 4  | 491.25 | 246.13 | 473.24 | 237.12 | Y   | 750.41 | 375.71 | 733.39 | 367.2  | 732.4  | 366.71 | 6     |
| 5  | 604.33 | 302.67 | 586.32 | 293.67 | L   | 587.35 | 294.18 | 570.32 | 285.67 | 569.34 | 285.17 | 5     |
| 6  | 733.38 | 367.19 | 715.37 | 358.19 | E   | 474.27 | 237.64 | 457.24 | 229.12 | 456.26 | 228.63 | 4     |
| 7  | 790.4  | 395.7  | 772.39 | 386.7  | G   | 345.22 | 173.12 | 328.2  | 164.6  |        |        | 3     |
| 8  | 903.48 | 452.24 | 885.47 | 443.24 | I   | 288.2  | 144.61 | 271.18 | 136.09 |        |        | 2     |
| 9  |        |        |        |        | R   | 175.12 | 88.06  | 158.09 | 79.55  |        |        | 1     |



|    |         |         |         |        |         |        |   |        |        |        |        |        |        |   |
|----|---------|---------|---------|--------|---------|--------|---|--------|--------|--------|--------|--------|--------|---|
| 13 | 1390.67 | 695.84  |         |        | 1372.66 | 686.84 | L | 882.42 | 441.71 | 865.39 | 433.2  | 864.41 | 432.71 | 7 |
| 14 | 1504.72 | 752.86  | 1487.69 | 744.35 | 1486.71 | 743.86 | N | 769.34 | 385.17 | 752.31 | 376.66 | 751.33 | 376.17 | 6 |
| 15 | 1633.76 | 817.38  | 1616.73 | 808.87 | 1615.75 | 808.38 | E | 655.29 | 328.15 | 638.27 | 319.64 | 637.28 | 319.15 | 5 |
| 16 | 1762.8  | 881.9   | 1745.78 | 873.39 | 1744.79 | 872.9  | E | 526.25 | 263.63 | 509.22 | 255.12 | 508.24 | 254.62 | 4 |
| 17 | 1849.83 | 925.42  | 1832.81 | 916.91 | 1831.82 | 916.42 | S | 397.21 | 199.11 | 380.18 | 190.59 | 379.2  | 190.1  | 3 |
| 18 | 2012.9  | 1006.95 | 1995.87 | 998.44 | 1994.89 | 997.95 | Y | 310.18 | 155.59 | 293.15 | 147.08 |        |        | 2 |
| 19 |         |         |         |        |         |        | K | 147.11 | 74.06  | 130.09 | 65.55  |        |        | 1 |

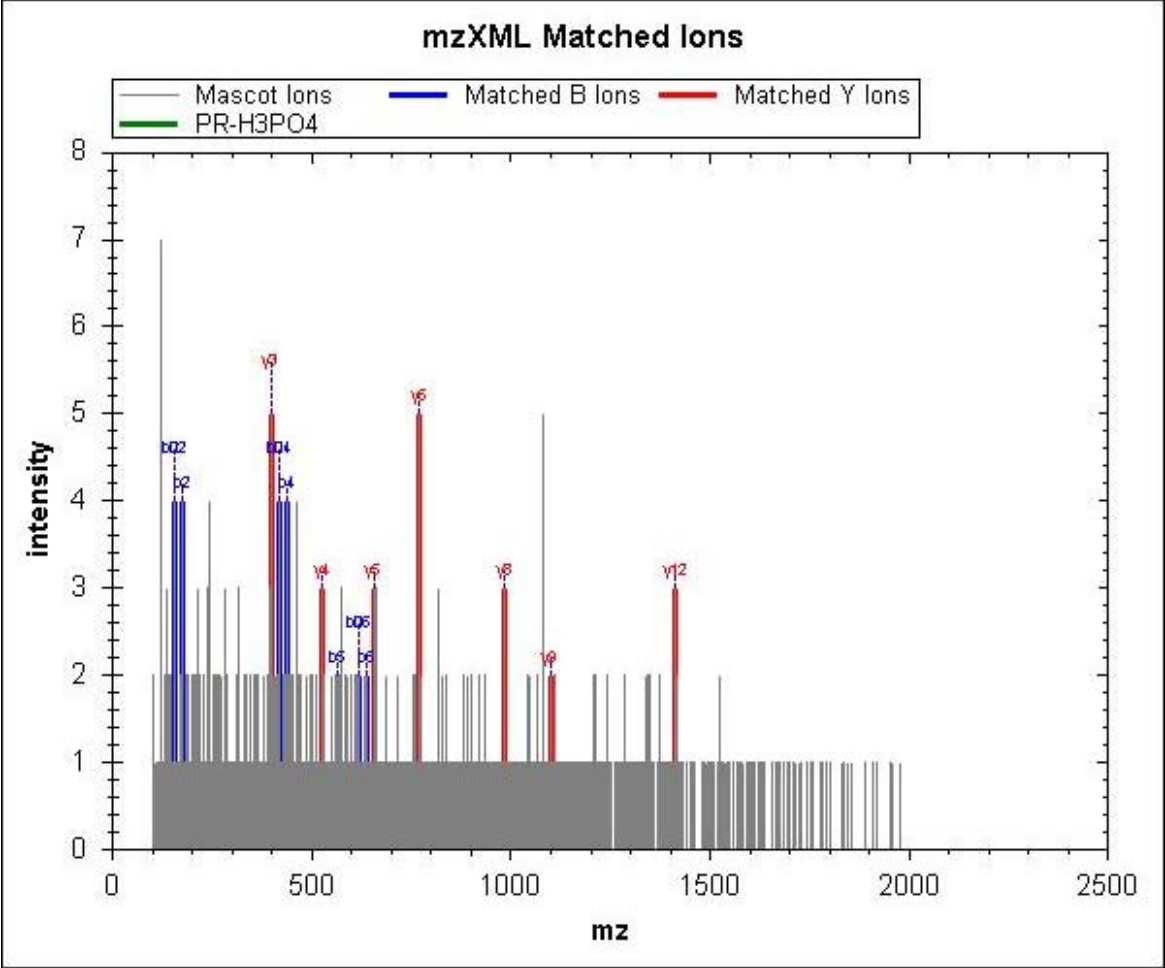

Protein index=1423, ACC No: IPI00472058

Peptide index=635 MS/MS spectrum

Sequence: TVVAPSAVAGK, m/z:500.2919, charge:+ 2, Modification: , Mod Position:

Score: 32.13, Raw data:WET\_B5\_090616\_02.mzxml, MS/MS Elution time: 21.69967, Scan number:1029, Mass delta:-0.0068, Rank:1

| No | b      | b++    | b0     | b0++   | Seq | y      | y++    | y*     | y*++   | y0     | y0++   | RevNo |
|----|--------|--------|--------|--------|-----|--------|--------|--------|--------|--------|--------|-------|
| 1  | 102.05 | 51.53  | 84.04  | 42.53  | T   |        |        |        |        |        |        | 11    |
| 2  | 201.12 | 101.07 | 183.11 | 92.06  | V   | 898.54 | 449.77 | 881.51 | 441.26 | 880.53 | 440.77 | 10    |
| 3  | 300.19 | 150.6  | 282.18 | 141.59 | V   | 799.47 | 400.24 | 782.44 | 391.72 | 781.46 | 391.23 | 9     |
| 4  | 371.23 | 186.12 | 353.22 | 177.11 | A   | 700.4  | 350.7  | 683.37 | 342.19 | 682.39 | 341.7  | 8     |
| 5  | 468.28 | 234.64 | 450.27 | 225.64 | P   | 629.36 | 315.18 | 612.34 | 306.67 | 611.35 | 306.18 | 7     |

|    |        |        |        |        |   |        |        |        |        |       |        |   |
|----|--------|--------|--------|--------|---|--------|--------|--------|--------|-------|--------|---|
| 6  | 555.31 | 278.16 | 537.3  | 269.16 | S | 532.31 | 266.66 | 515.28 | 258.14 | 514.3 | 257.65 | 6 |
| 7  | 626.35 | 313.68 | 608.34 | 304.67 | A | 445.28 | 223.14 | 428.25 | 214.63 |       |        | 5 |
| 8  | 725.42 | 363.21 | 707.41 | 354.21 | V | 374.24 | 187.62 | 357.21 | 179.11 |       |        | 4 |
| 9  | 796.46 | 398.73 | 778.45 | 389.73 | A | 275.17 | 138.09 | 258.14 | 129.58 |       |        | 3 |
| 10 | 853.48 | 427.24 | 835.47 | 418.24 | G | 204.13 | 102.57 | 187.11 | 94.06  |       |        | 2 |
| 11 |        |        |        |        | K | 147.11 | 74.06  | 130.09 | 65.55  |       |        | 1 |

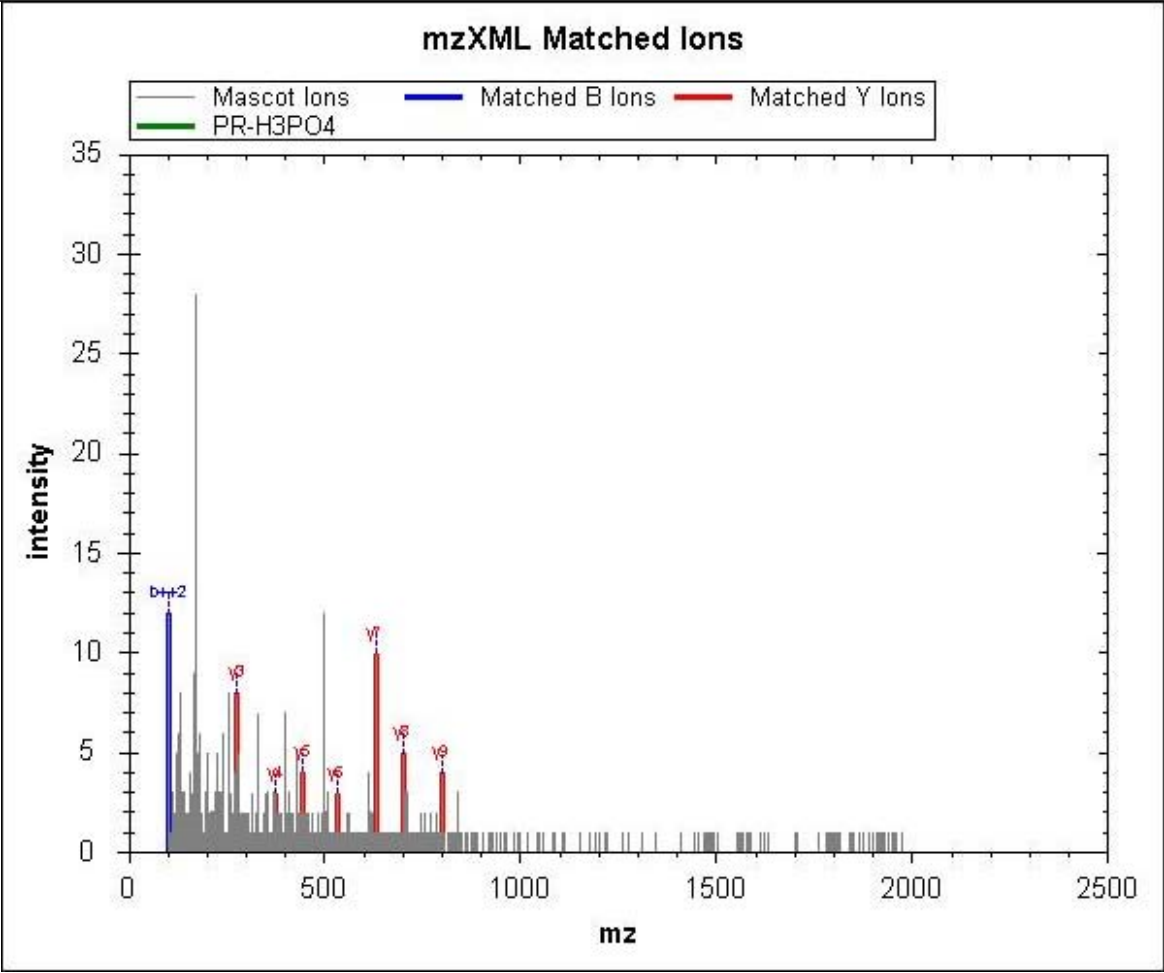

Protein index=1424, ACC No: IPI00021923

Peptide index=6862 MS/MS spectrum

Sequence: YFDMWGGDVAPFIEFLK, m/z:1025.997, charge:+ 2, Modification: Oxidation (M), Mod Position: 0.000100000000000000.0

Score: 43.05, Raw data:WET\_B5\_090616\_02.mzxml, MS/MS Elution time: 98.4, Scan number:5531, Mass delta:0.0256, Rank:1

| No | b      | b++    | b0     | b0++   | Seq | y       | y++    | y*      | y*++   | y0      | y0++   | RevNo |
|----|--------|--------|--------|--------|-----|---------|--------|---------|--------|---------|--------|-------|
| 1  | 164.07 | 82.54  |        |        | Y   |         |        |         |        |         |        | 17    |
| 2  | 311.14 | 156.07 |        |        | F   | 1887.9  | 944.45 | 1870.87 | 935.94 | 1869.89 | 935.45 | 16    |
| 3  | 426.17 | 213.59 | 408.16 | 204.58 | D   | 1740.83 | 870.92 | 1723.8  | 862.41 | 1722.82 | 861.91 | 15    |
| 4  | 573.2  | 287.1  | 555.19 | 278.1  | M   | 1625.8  | 813.41 | 1608.78 | 804.89 | 1607.79 | 804.4  | 14    |
| 5  | 759.28 | 380.14 | 741.27 | 371.14 | W   | 1478.77 | 739.89 | 1461.74 | 731.37 | 1460.76 | 730.88 | 13    |

|    |         |        |         |        |   |         |        |         |        |         |        |    |
|----|---------|--------|---------|--------|---|---------|--------|---------|--------|---------|--------|----|
| 6  | 816.3   | 408.65 | 798.29  | 399.65 | G | 1292.69 | 646.85 | 1275.66 | 638.33 | 1274.68 | 637.84 | 12 |
| 7  | 873.32  | 437.17 | 855.31  | 428.16 | G | 1235.67 | 618.34 | 1218.64 | 609.82 | 1217.66 | 609.33 | 11 |
| 8  | 988.35  | 494.68 | 970.34  | 485.67 | D | 1178.65 | 589.83 | 1161.62 | 581.31 | 1160.63 | 580.82 | 10 |
| 9  | 1087.42 | 544.21 | 1069.41 | 535.21 | V | 1063.62 | 532.31 | 1046.59 | 523.8  | 1045.61 | 523.31 | 9  |
| 10 | 1158.46 | 579.73 | 1140.45 | 570.73 | A | 964.55  | 482.78 | 947.52  | 474.27 | 946.54  | 473.77 | 8  |
| 11 | 1255.51 | 628.26 | 1237.5  | 619.25 | P | 893.51  | 447.26 | 876.49  | 438.75 | 875.5   | 438.25 | 7  |
| 12 | 1402.58 | 701.79 | 1384.57 | 692.79 | F | 796.46  | 398.73 | 779.43  | 390.22 | 778.45  | 389.73 | 6  |
| 13 | 1515.66 | 758.33 | 1497.65 | 749.33 | I | 649.39  | 325.2  | 632.37  | 316.69 | 631.38  | 316.19 | 5  |
| 14 | 1644.7  | 822.86 | 1626.69 | 813.85 | E | 536.31  | 268.66 | 519.28  | 260.14 | 518.3   | 259.65 | 4  |
| 15 | 1791.77 | 896.39 | 1773.76 | 887.38 | F | 407.27  | 204.14 | 390.24  | 195.62 |         |        | 3  |
| 16 | 1904.86 | 952.93 | 1886.85 | 943.93 | L | 260.2   | 130.6  | 243.17  | 122.09 |         |        | 2  |
| 17 |         |        |         |        | K | 147.11  | 74.06  | 130.09  | 65.55  |         |        | 1  |

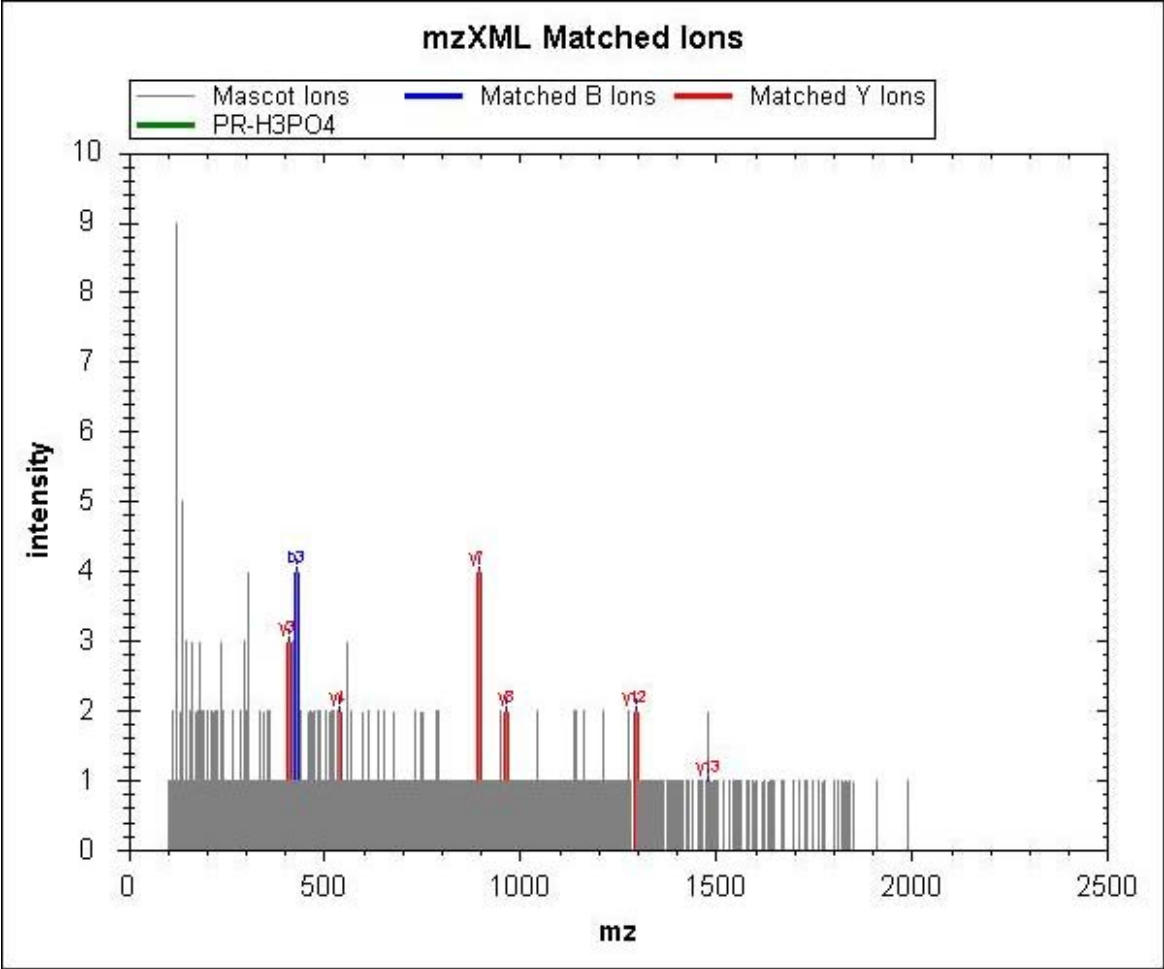

Protein index=1425, ACC No: IPI00010438

Peptide index=4093 MS/MS spectrum

Sequence: ILGLAIESQDAGIK, m/z:714.4053, charge:+ 2, Modification: , Mod Position:

Score: 92.84, Raw data:WET\_B5\_090616\_02.mzxml, MS/MS Elution time: 59.11183, Scan number:3229, Mass delta:-0.007, Rank:1

| No | b | b++ | b* | b*++ | b0 | b0++ | Seq | y | y++ | y* | y*++ | y0 | y0++ | RevNo |
|----|---|-----|----|------|----|------|-----|---|-----|----|------|----|------|-------|
|----|---|-----|----|------|----|------|-----|---|-----|----|------|----|------|-------|

|    |         |        |         |        |         |        |   |         |        |         |        |         |        |    |
|----|---------|--------|---------|--------|---------|--------|---|---------|--------|---------|--------|---------|--------|----|
| 1  | 114.09  | 57.55  |         |        |         |        | I |         |        |         |        |         |        | 14 |
| 2  | 227.18  | 114.09 |         |        |         |        | L | 1314.73 | 657.87 | 1297.7  | 649.35 | 1296.72 | 648.86 | 13 |
| 3  | 284.2   | 142.6  |         |        |         |        | G | 1201.64 | 601.32 | 1184.62 | 592.81 | 1183.63 | 592.32 | 12 |
| 4  | 397.28  | 199.14 |         |        |         |        | L | 1144.62 | 572.81 | 1127.59 | 564.3  | 1126.61 | 563.81 | 11 |
| 5  | 468.32  | 234.66 |         |        |         |        | A | 1031.54 | 516.27 | 1014.51 | 507.76 | 1013.53 | 507.27 | 10 |
| 6  | 581.4   | 291.2  |         |        |         |        | I | 960.5   | 480.75 | 943.47  | 472.24 | 942.49  | 471.75 | 9  |
| 7  | 710.44  | 355.73 |         |        | 692.43  | 346.72 | E | 847.42  | 424.21 | 830.39  | 415.7  | 829.41  | 415.21 | 8  |
| 8  | 797.48  | 399.24 |         |        | 779.47  | 390.24 | S | 718.37  | 359.69 | 701.35  | 351.18 | 700.36  | 350.68 | 7  |
| 9  | 925.54  | 463.27 | 908.51  | 454.76 | 907.52  | 454.27 | Q | 631.34  | 316.17 | 614.31  | 307.66 | 613.33  | 307.17 | 6  |
| 10 | 1040.56 | 520.78 | 1023.54 | 512.27 | 1022.55 | 511.78 | D | 503.28  | 252.14 | 486.26  | 243.63 | 485.27  | 243.14 | 5  |
| 11 | 1111.6  | 556.3  | 1094.57 | 547.79 | 1093.59 | 547.3  | A | 388.26  | 194.63 | 371.23  | 186.12 |         |        | 4  |
| 12 | 1168.62 | 584.81 | 1151.59 | 576.3  | 1150.61 | 575.81 | G | 317.22  | 159.11 | 300.19  | 150.6  |         |        | 3  |
| 13 | 1281.7  | 641.36 | 1264.68 | 632.84 | 1263.69 | 632.35 | I | 260.2   | 130.6  | 243.17  | 122.09 |         |        | 2  |
| 14 |         |        |         |        |         |        | K | 147.11  | 74.06  | 130.09  | 65.55  |         |        | 1  |

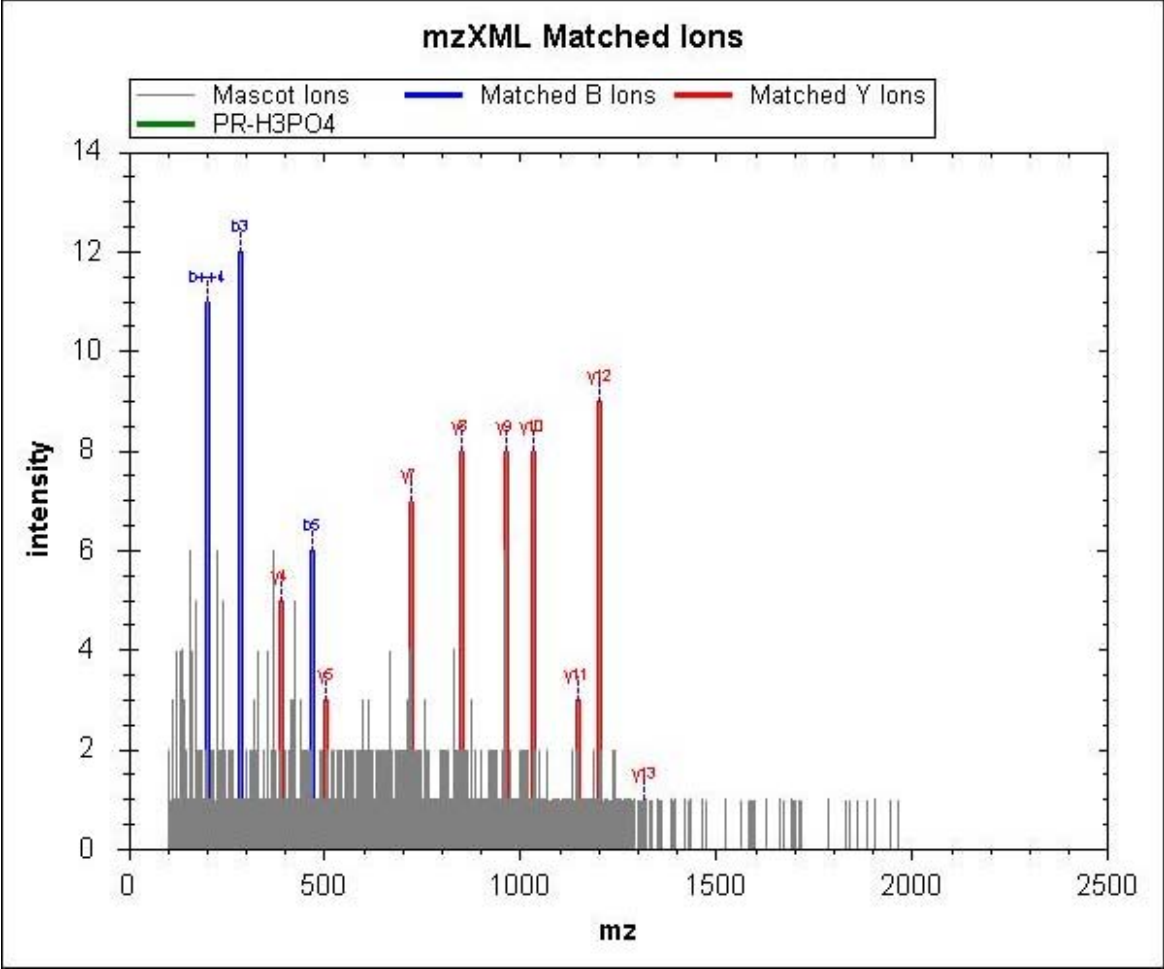

Protein index=1426, ACC No: IPI00152002

Peptide index=7206 MS/MS spectrum

Sequence: AELDSLVLQLLGDLEELEGKR, m/z:780.7626, charge:+ 3, Modification: , Mod Position:

Score: 32.16, Raw data:WET\_B5\_090616\_02.mzxml, MS/MS Elution time: 112.6918, Scan number:6429, Mass delta:0.0077, Rank:1

| No | b       | b++     | b*      | b*++    | b0      | b0++    | Seq | y       | y++     | y*      | y*++    | y0      | y0++    | RevNo |
|----|---------|---------|---------|---------|---------|---------|-----|---------|---------|---------|---------|---------|---------|-------|
| 1  | 72.04   | 36.53   |         |         |         |         | A   |         |         |         |         |         |         | 21    |
| 2  | 201.09  | 101.05  |         |         | 183.08  | 92.04   | E   | 2269.23 | 1135.12 | 2252.2  | 1126.6  | 2251.22 | 1126.11 | 20    |
| 3  | 314.17  | 157.59  |         |         | 296.16  | 148.58  | L   | 2140.19 | 1070.6  | 2123.16 | 1062.08 | 2122.18 | 1061.59 | 19    |
| 4  | 429.2   | 215.1   |         |         | 411.19  | 206.1   | D   | 2027.1  | 1014.05 | 2010.08 | 1005.54 | 2009.09 | 1005.05 | 18    |
| 5  | 516.23  | 258.62  |         |         | 498.22  | 249.61  | S   | 1912.07 | 956.54  | 1895.05 | 948.03  | 1894.06 | 947.54  | 17    |
| 6  | 629.31  | 315.16  |         |         | 611.3   | 306.16  | L   | 1825.04 | 913.03  | 1808.02 | 904.51  | 1807.03 | 904.02  | 16    |
| 7  | 728.38  | 364.69  |         |         | 710.37  | 355.69  | V   | 1711.96 | 856.48  | 1694.93 | 847.97  | 1693.95 | 847.48  | 15    |
| 8  | 841.47  | 421.24  |         |         | 823.46  | 412.23  | L   | 1612.89 | 806.95  | 1595.86 | 798.44  | 1594.88 | 797.94  | 14    |
| 9  | 969.53  | 485.27  | 952.5   | 476.75  | 951.51  | 476.26  | Q   | 1499.81 | 750.41  | 1482.78 | 741.89  | 1481.8  | 741.4   | 13    |
| 10 | 1082.61 | 541.81  | 1065.58 | 533.3   | 1064.6  | 532.8   | L   | 1371.75 | 686.38  | 1354.72 | 677.86  | 1353.74 | 677.37  | 12    |
| 11 | 1195.69 | 598.35  | 1178.67 | 589.84  | 1177.68 | 589.35  | L   | 1258.66 | 629.84  | 1241.64 | 621.32  | 1240.65 | 620.83  | 11    |
| 12 | 1252.71 | 626.86  | 1235.69 | 618.35  | 1234.7  | 617.86  | G   | 1145.58 | 573.29  | 1128.55 | 564.78  | 1127.57 | 564.29  | 10    |
| 13 | 1367.74 | 684.37  | 1350.72 | 675.86  | 1349.73 | 675.37  | D   | 1088.56 | 544.78  | 1071.53 | 536.27  | 1070.55 | 535.78  | 9     |
| 14 | 1480.83 | 740.92  | 1463.8  | 732.4   | 1462.82 | 731.91  | L   | 973.53  | 487.27  | 956.5   | 478.76  | 955.52  | 478.26  | 8     |
| 15 | 1609.87 | 805.44  | 1592.84 | 796.92  | 1591.86 | 796.43  | E   | 860.45  | 430.73  | 843.42  | 422.21  | 842.44  | 421.72  | 7     |
| 16 | 1738.91 | 869.96  | 1721.88 | 861.45  | 1720.9  | 860.95  | E   | 731.4   | 366.21  | 714.38  | 357.69  | 713.39  | 357.2   | 6     |
| 17 | 1852    | 926.5   | 1834.97 | 917.99  | 1833.98 | 917.5   | L   | 602.36  | 301.68  | 585.34  | 293.17  | 584.35  | 292.68  | 5     |
| 18 | 1981.04 | 991.02  | 1964.01 | 982.51  | 1963.03 | 982.02  | E   | 489.28  | 245.14  | 472.25  | 236.63  | 471.27  | 236.14  | 4     |
| 19 | 2038.06 | 1019.53 | 2021.03 | 1011.02 | 2020.05 | 1010.53 | G   | 360.24  | 180.62  | 343.21  | 172.11  |         |         | 3     |
| 20 | 2166.15 | 1083.58 | 2149.13 | 1075.07 | 2148.14 | 1074.58 | K   | 303.21  | 152.11  | 286.19  | 143.6   |         |         | 2     |
| 21 |         |         |         |         |         |         | R   | 175.12  | 88.06   | 158.09  | 79.55   |         |         | 1     |

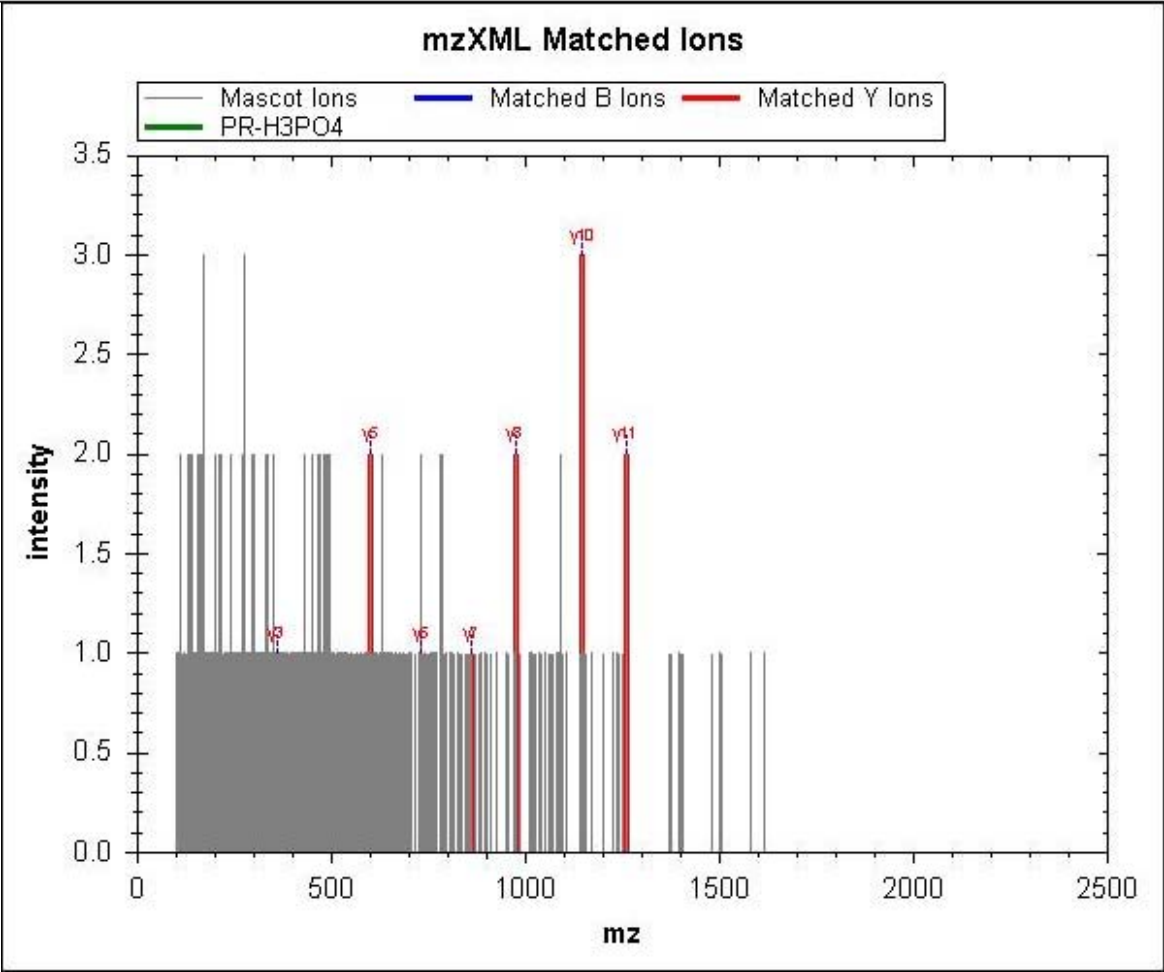

Protein index=1427, ACC No: IPI00015029

Peptide index=5948 MS/MS spectrum

Sequence: LNWLSVDFNNWK, m/z:768.3902, charge:+ 2, Modification: , Mod Position:

Score: 61.6, Raw data:WET\_B5\_090616\_03.mzxml, MS/MS Elution time: 80.232, Scan number:4460, Mass delta:0.013, Rank:1

| No | b       | b++    | b*      | b*++   | b0      | b0++   | Seq | y       | y++    | y*      | y*++   | y0      | y0++   | RevNo |
|----|---------|--------|---------|--------|---------|--------|-----|---------|--------|---------|--------|---------|--------|-------|
| 1  | 114.09  | 57.55  |         |        |         |        | L   |         |        |         |        |         |        | 12    |
| 2  | 228.13  | 114.57 | 211.11  | 106.06 |         |        | N   | 1422.68 | 711.84 | 1405.65 | 703.33 | 1404.67 | 702.84 | 11    |
| 3  | 414.21  | 207.61 | 397.19  | 199.1  |         |        | W   | 1308.64 | 654.82 | 1291.61 | 646.31 | 1290.63 | 645.82 | 10    |
| 4  | 527.3   | 264.15 | 510.27  | 255.64 |         |        | L   | 1122.56 | 561.78 | 1105.53 | 553.27 | 1104.55 | 552.78 | 9     |
| 5  | 614.33  | 307.67 | 597.3   | 299.16 | 596.32  | 298.66 | S   | 1009.47 | 505.24 | 992.45  | 496.73 | 991.46  | 496.24 | 8     |
| 6  | 713.4   | 357.2  | 696.37  | 348.69 | 695.39  | 348.2  | V   | 922.44  | 461.72 | 905.42  | 453.21 | 904.43  | 452.72 | 7     |
| 7  | 828.42  | 414.72 | 811.4   | 406.2  | 810.41  | 405.71 | D   | 823.37  | 412.19 | 806.35  | 403.68 | 805.36  | 403.18 | 6     |
| 8  | 975.49  | 488.25 | 958.47  | 479.74 | 957.48  | 479.25 | F   | 708.35  | 354.68 | 691.32  | 346.16 |         |        | 5     |
| 9  | 1089.54 | 545.27 | 1072.51 | 536.76 | 1071.53 | 536.27 | N   | 561.28  | 281.14 | 544.25  | 272.63 |         |        | 4     |
| 10 | 1203.58 | 602.29 | 1186.55 | 593.78 | 1185.57 | 593.29 | N   | 447.24  | 224.12 | 430.21  | 215.61 |         |        | 3     |
| 11 | 1389.66 | 695.33 | 1372.63 | 686.82 | 1371.65 | 686.33 | W   | 333.19  | 167.1  | 316.17  | 158.59 |         |        | 2     |
| 12 |         |        |         |        |         |        | K   | 147.11  | 74.06  | 130.09  | 65.55  |         |        | 1     |

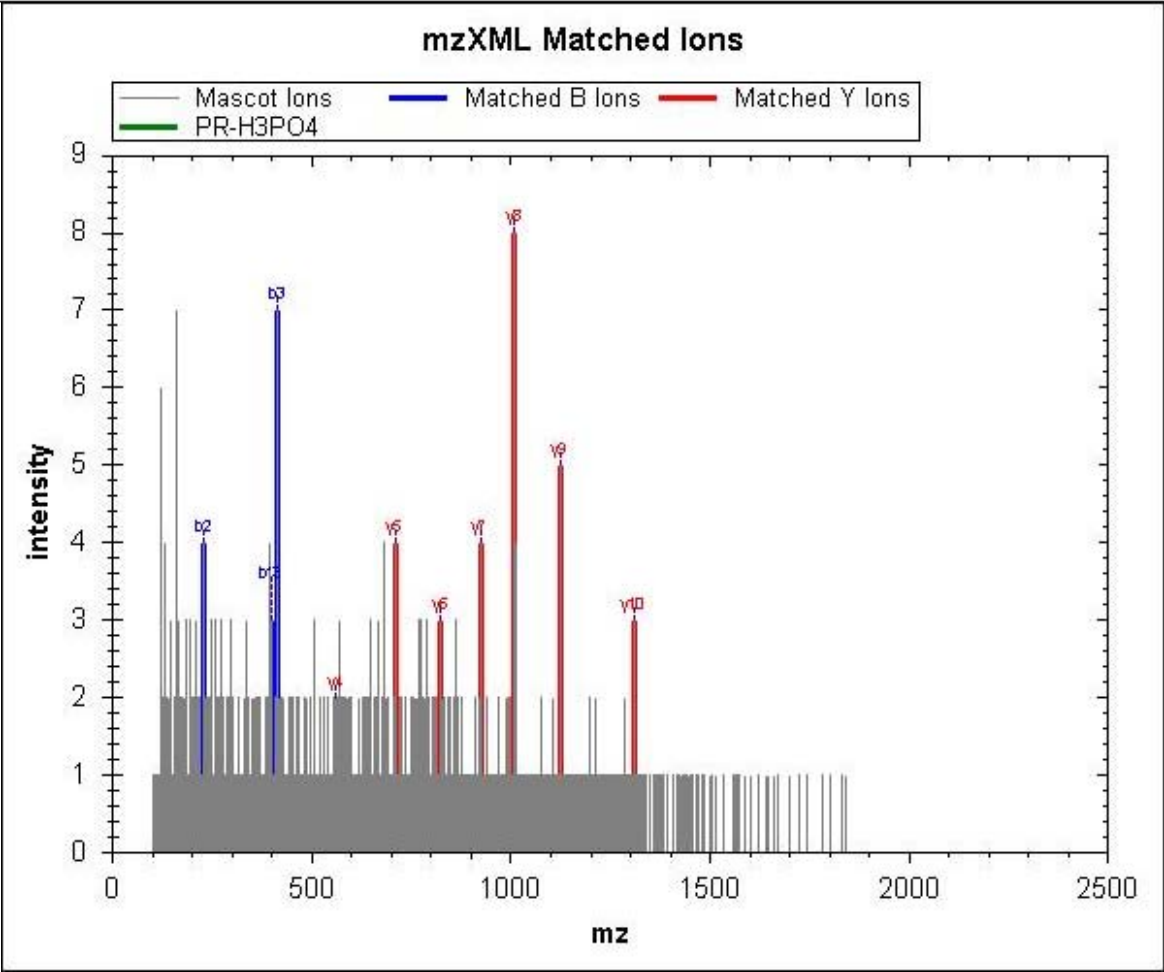

Protein index=1428, ACC No: IPI00017816

Peptide index=5138 MS/MS spectrum

Sequence: YLLS~~D~~LP~~G~~VR, m/z:623.3588, charge: + 2, Modification: , Mod Position:

Score: 43.58, Raw data: WET\_B5\_090616\_02.mzxml, MS/MS Elution time: 69.76584, Scan number: 3853, Mass delta: -0.0097, Rank: 1

| No | b       | b++    | b0     | b0++   | Seq | y       | y++    | y*      | y*++   | y0      | y0++   | RevNo |
|----|---------|--------|--------|--------|-----|---------|--------|---------|--------|---------|--------|-------|
| 1  | 164.07  | 82.54  |        |        | Y   |         |        |         |        |         |        | 11    |
| 2  | 277.15  | 139.08 |        |        | L   | 1082.66 | 541.83 | 1065.63 | 533.32 | 1064.65 | 532.83 | 10    |
| 3  | 390.24  | 195.62 |        |        | L   | 969.57  | 485.29 | 952.55  | 476.78 | 951.56  | 476.28 | 9     |
| 4  | 503.32  | 252.17 |        |        | L   | 856.49  | 428.75 | 839.46  | 420.23 | 838.48  | 419.74 | 8     |
| 5  | 590.35  | 295.68 | 572.34 | 286.68 | S   | 743.4   | 372.21 | 726.38  | 363.69 | 725.39  | 363.2  | 7     |
| 6  | 705.38  | 353.19 | 687.37 | 344.19 | D   | 656.37  | 328.69 | 639.35  | 320.18 | 638.36  | 319.68 | 6     |
| 7  | 818.47  | 409.74 | 800.46 | 400.73 | L   | 541.35  | 271.18 | 524.32  | 262.66 |         |        | 5     |
| 8  | 915.52  | 458.26 | 897.51 | 449.26 | P   | 428.26  | 214.63 | 411.24  | 206.12 |         |        | 4     |
| 9  | 972.54  | 486.77 | 954.53 | 477.77 | G   | 331.21  | 166.11 | 314.18  | 157.59 |         |        | 3     |
| 10 | 1071.61 | 536.31 | 1053.6 | 527.3  | V   | 274.19  | 137.6  | 257.16  | 129.08 |         |        | 2     |
| 11 |         |        |        |        | R   | 175.12  | 88.06  | 158.09  | 79.55  |         |        | 1     |

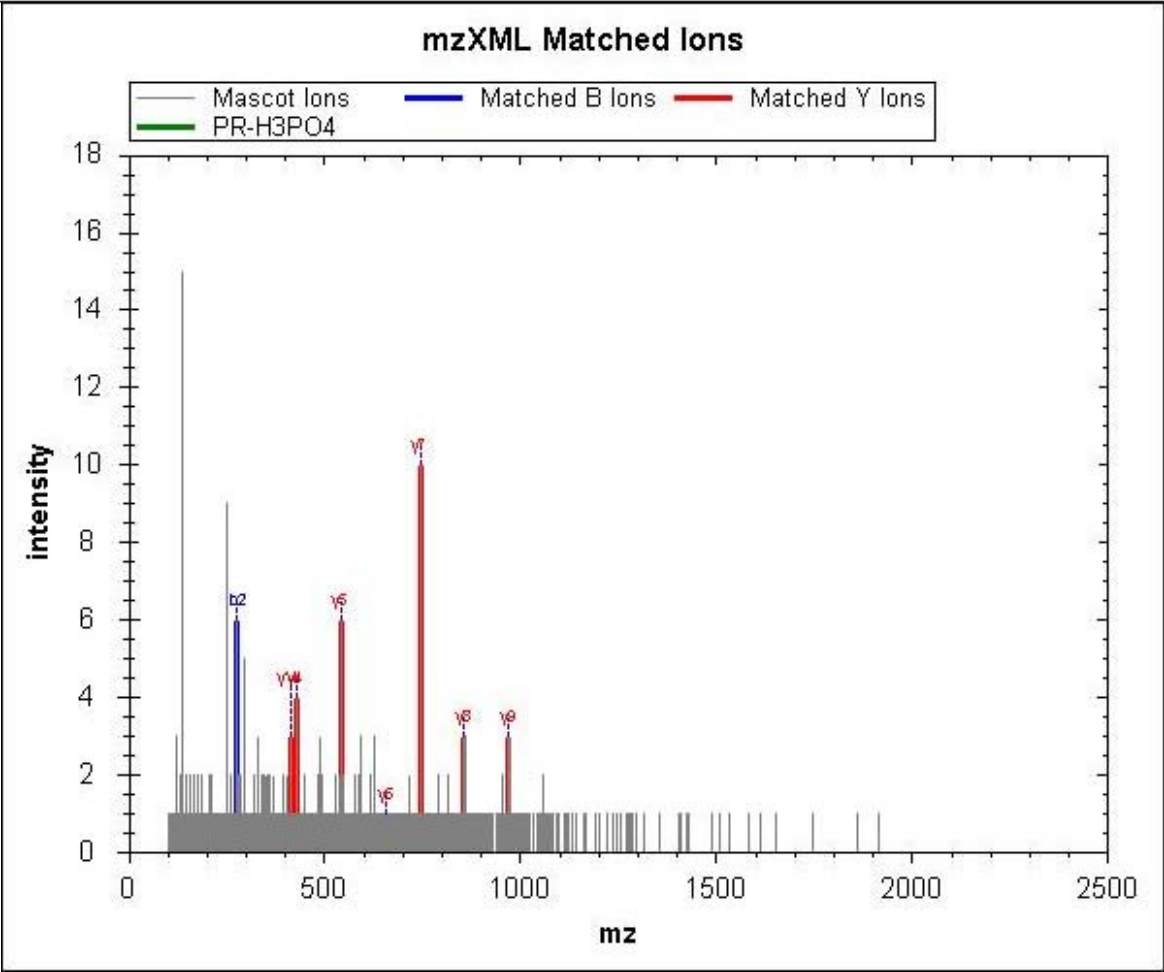

Protein index=1429, ACC No: IPI00478470

Peptide index=50 MS/MS spectrum

Sequence: LSAKPAPPKPEPK, m/z:453.9339, charge:+ 3, Modification: , Mod Position:

Score: 51.98, Raw data:WET\_B5\_090616\_02.mzxml, MS/MS Elution time: 15.10752, Scan number:643, Mass delta:-0.0122, Rank:1

| No | b       | b++    | b*      | b*++   | b0      | b0++   | Seq | y       | y++    | y*      | y*++   | y0      | y0++   | RevNo |
|----|---------|--------|---------|--------|---------|--------|-----|---------|--------|---------|--------|---------|--------|-------|
| 1  | 114.09  | 57.55  |         |        |         |        | L   |         |        |         |        |         |        | 13    |
| 2  | 201.12  | 101.07 |         |        | 183.11  | 92.06  | S   | 1246.72 | 623.86 | 1229.69 | 615.35 | 1228.7  | 614.86 | 12    |
| 3  | 272.16  | 136.58 |         |        | 254.15  | 127.58 | A   | 1159.68 | 580.35 | 1142.66 | 571.83 | 1141.67 | 571.34 | 11    |
| 4  | 400.26  | 200.63 | 383.23  | 192.12 | 382.24  | 191.63 | K   | 1088.65 | 544.83 | 1071.62 | 536.31 | 1070.64 | 535.82 | 10    |
| 5  | 497.31  | 249.16 | 480.28  | 240.64 | 479.3   | 240.15 | P   | 960.55  | 480.78 | 943.52  | 472.27 | 942.54  | 471.77 | 9     |
| 6  | 568.35  | 284.68 | 551.32  | 276.16 | 550.33  | 275.67 | A   | 863.5   | 432.25 | 846.47  | 423.74 | 845.49  | 423.25 | 8     |
| 7  | 665.4   | 333.2  | 648.37  | 324.69 | 647.39  | 324.2  | P   | 792.46  | 396.73 | 775.43  | 388.22 | 774.45  | 387.73 | 7     |
| 8  | 762.45  | 381.73 | 745.42  | 373.22 | 744.44  | 372.72 | P   | 695.41  | 348.21 | 678.38  | 339.69 | 677.4   | 339.2  | 6     |
| 9  | 890.55  | 445.78 | 873.52  | 437.26 | 872.54  | 436.77 | K   | 598.36  | 299.68 | 581.33  | 291.17 | 580.35  | 290.68 | 5     |
| 10 | 987.6   | 494.3  | 970.57  | 485.79 | 969.59  | 485.3  | P   | 470.26  | 235.63 | 453.23  | 227.12 | 452.25  | 226.63 | 4     |
| 11 | 1116.64 | 558.82 | 1099.61 | 550.31 | 1098.63 | 549.82 | E   | 373.21  | 187.11 | 356.18  | 178.59 | 355.2   | 178.1  | 3     |
| 12 | 1213.69 | 607.35 | 1196.67 | 598.84 | 1195.68 | 598.35 | P   | 244.17  | 122.59 | 227.14  | 114.07 |         |        | 2     |

|    |  |  |  |  |   |        |       |        |       |  |  |   |
|----|--|--|--|--|---|--------|-------|--------|-------|--|--|---|
| 13 |  |  |  |  | K | 147.11 | 74.06 | 130.09 | 65.55 |  |  | 1 |
|----|--|--|--|--|---|--------|-------|--------|-------|--|--|---|

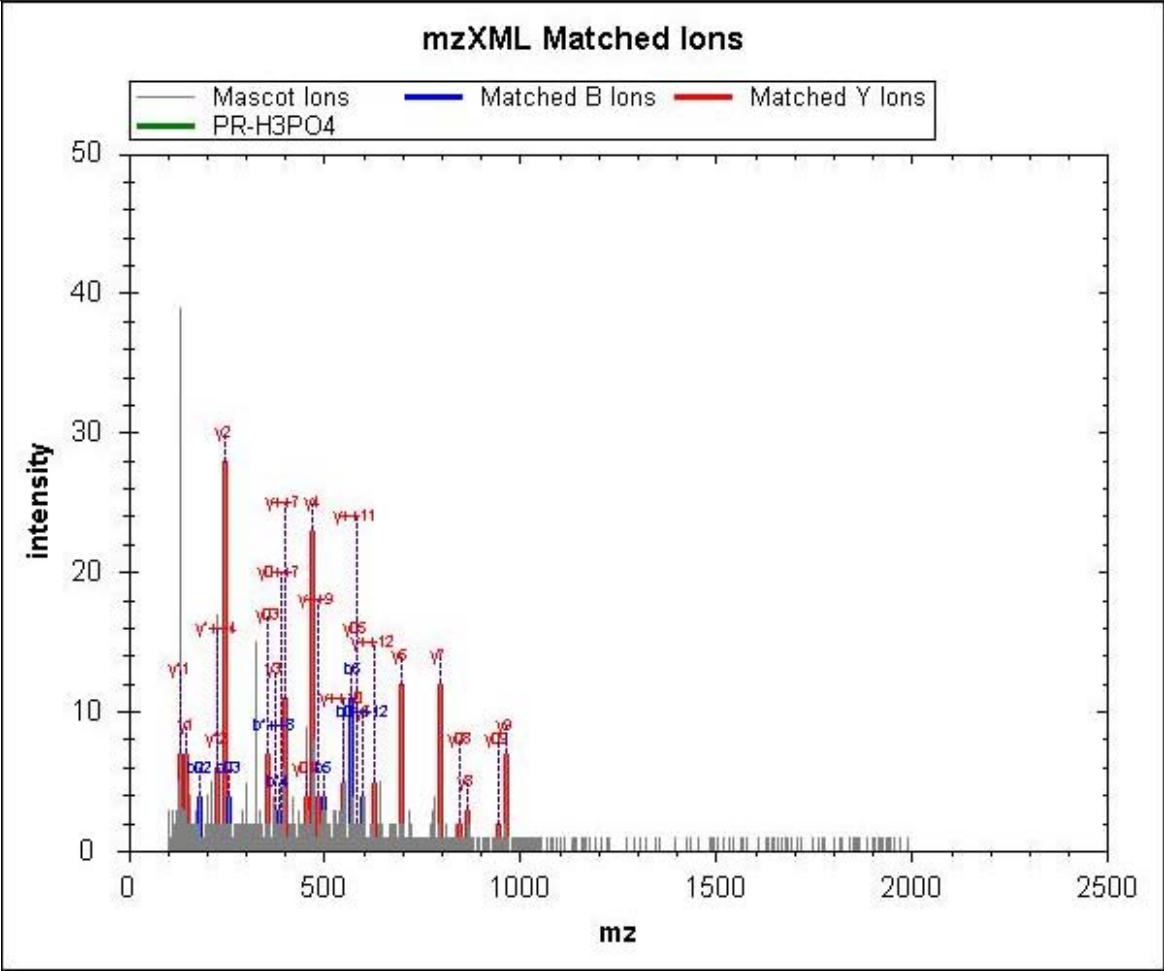

Protein index=1431, ACC No: IPI00291417

Peptide index=6900 MS/MS spectrum

Sequence: YVILDIPLLFETK, m/z:782.459, charge:+ 2, Modification: , Mod Position:

Score: 43.37, Raw data:WET\_B5\_090616\_02.mzxml, MS/MS Elution time: 99.625, Scan number:5603, Mass delta:0.0074, Rank:1

| No | b       | b++    | b0      | b0++   | Seq | y       | y++    | y*      | y*++   | y0      | y0++   | RevNo |
|----|---------|--------|---------|--------|-----|---------|--------|---------|--------|---------|--------|-------|
| 1  | 164.07  | 82.54  |         |        | Y   |         |        |         |        |         |        | 13    |
| 2  | 263.14  | 132.07 |         |        | V   | 1400.84 | 700.92 | 1383.81 | 692.41 | 1382.83 | 691.92 | 12    |
| 3  | 376.22  | 188.62 |         |        | I   | 1301.77 | 651.39 | 1284.74 | 642.88 | 1283.76 | 642.38 | 11    |
| 4  | 489.31  | 245.16 |         |        | L   | 1188.69 | 594.85 | 1171.66 | 586.33 | 1170.68 | 585.84 | 10    |
| 5  | 604.33  | 302.67 | 586.32  | 293.67 | D   | 1075.6  | 538.31 | 1058.58 | 529.79 | 1057.59 | 529.3  | 9     |
| 6  | 717.42  | 359.21 | 699.41  | 350.21 | I   | 960.58  | 480.79 | 943.55  | 472.28 | 942.57  | 471.79 | 8     |
| 7  | 814.47  | 407.74 | 796.46  | 398.73 | P   | 847.49  | 424.25 | 830.47  | 415.74 | 829.48  | 415.24 | 7     |
| 8  | 927.55  | 464.28 | 909.54  | 455.28 | L   | 750.44  | 375.72 | 733.41  | 367.21 | 732.43  | 366.72 | 6     |
| 9  | 1040.64 | 520.82 | 1022.63 | 511.82 | L   | 637.36  | 319.18 | 620.33  | 310.67 | 619.34  | 310.18 | 5     |
| 10 | 1187.71 | 594.36 | 1169.7  | 585.35 | F   | 524.27  | 262.64 | 507.24  | 254.13 | 506.26  | 253.63 | 4     |
| 11 | 1316.75 | 658.88 | 1298.74 | 649.87 | E   | 377.2   | 189.11 | 360.18  | 180.59 | 359.19  | 180.1  | 3     |

|    |        |       |         |       |   |        |        |        |        |        |        |   |
|----|--------|-------|---------|-------|---|--------|--------|--------|--------|--------|--------|---|
| 12 | 1417.8 | 709.4 | 1399.79 | 700.4 | T | 248.16 | 124.58 | 231.13 | 116.07 | 230.15 | 115.58 | 2 |
| 13 |        |       |         |       | K | 147.11 | 74.06  | 130.09 | 65.55  |        |        | 1 |

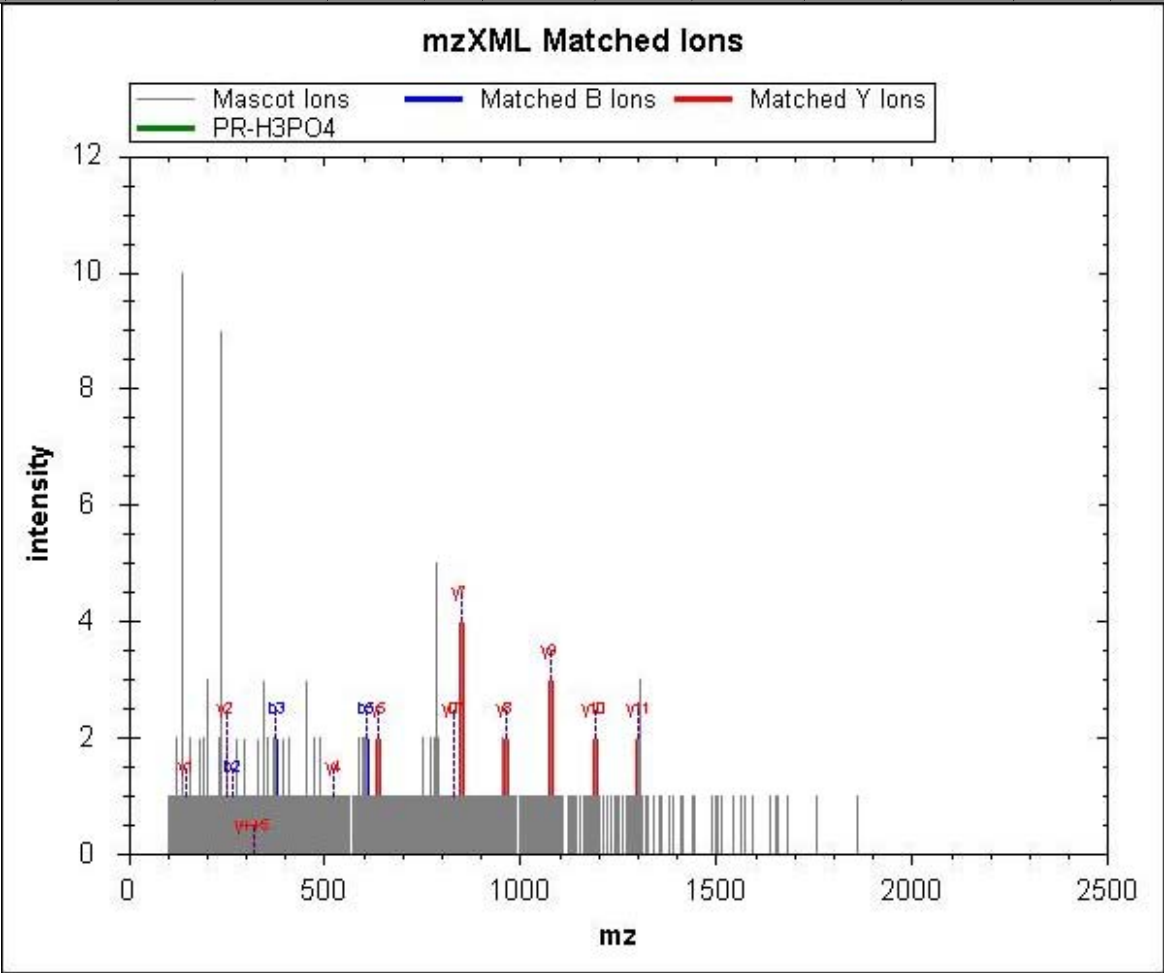

Protein index=1432, ACC No: IPI00220766

Peptide index=1104 MS/MS spectrum

Sequence: RFEELGVK, m/z:489.2769, charge:+ 2, Modification: , Mod Position:

Score: 41.29, Raw data:WET\_B5\_090616\_02.mzxml, MS/MS Elution time: 29.70333, Scan number:1507, Mass delta:0.005, Rank:1

| No | b      | b++    | b*     | b*++   | b0     | b0++   | Seq | y      | y++    | y*     | y*++   | y0     | y0++   | RevNo |
|----|--------|--------|--------|--------|--------|--------|-----|--------|--------|--------|--------|--------|--------|-------|
| 1  | 157.11 | 79.06  | 140.08 | 70.54  |        |        | R   |        |        |        |        |        |        | 8     |
| 2  | 304.18 | 152.59 | 287.15 | 144.08 |        |        | F   | 821.44 | 411.22 | 804.41 | 402.71 | 803.43 | 402.22 | 7     |
| 3  | 433.22 | 217.11 | 416.19 | 208.6  | 415.21 | 208.11 | E   | 674.37 | 337.69 | 657.35 | 329.18 | 656.36 | 328.68 | 6     |
| 4  | 562.26 | 281.63 | 545.24 | 273.12 | 544.25 | 272.63 | E   | 545.33 | 273.17 | 528.3  | 264.65 | 527.32 | 264.16 | 5     |
| 5  | 675.35 | 338.18 | 658.32 | 329.66 | 657.34 | 329.17 | L   | 416.29 | 208.65 | 399.26 | 200.13 |        |        | 4     |
| 6  | 732.37 | 366.69 | 715.34 | 358.17 | 714.36 | 357.68 | G   | 303.2  | 152.1  | 286.18 | 143.59 |        |        | 3     |
| 7  | 831.44 | 416.22 | 814.41 | 407.71 | 813.43 | 407.22 | V   | 246.18 | 123.59 | 229.15 | 115.08 |        |        | 2     |
| 8  |        |        |        |        |        |        | K   | 147.11 | 74.06  | 130.09 | 65.55  |        |        | 1     |



|    |         |        |         |        |   |        |        |        |        |        |        |   |
|----|---------|--------|---------|--------|---|--------|--------|--------|--------|--------|--------|---|
| 13 | 1366.73 | 683.87 | 1348.71 | 674.86 | T | 662.37 | 331.69 | 645.35 | 323.18 | 644.36 | 322.68 | 6 |
| 14 | 1465.79 | 733.4  | 1447.78 | 724.4  | V | 561.32 | 281.17 | 544.3  | 272.65 | 543.31 | 272.16 | 5 |
| 15 | 1564.86 | 782.93 | 1546.85 | 773.93 | V | 462.26 | 231.63 | 445.23 | 223.12 | 444.25 | 222.63 | 4 |
| 16 | 1665.91 | 833.46 | 1647.9  | 824.45 | T | 363.19 | 182.1  | 346.16 | 173.58 | 345.18 | 173.09 | 3 |
| 17 | 1780.94 | 890.97 | 1762.93 | 881.97 | D | 262.14 | 131.57 | 245.11 | 123.06 | 244.13 | 122.57 | 2 |
| 18 |         |        |         |        | K | 147.11 | 74.06  | 130.09 | 65.55  |        |        | 1 |

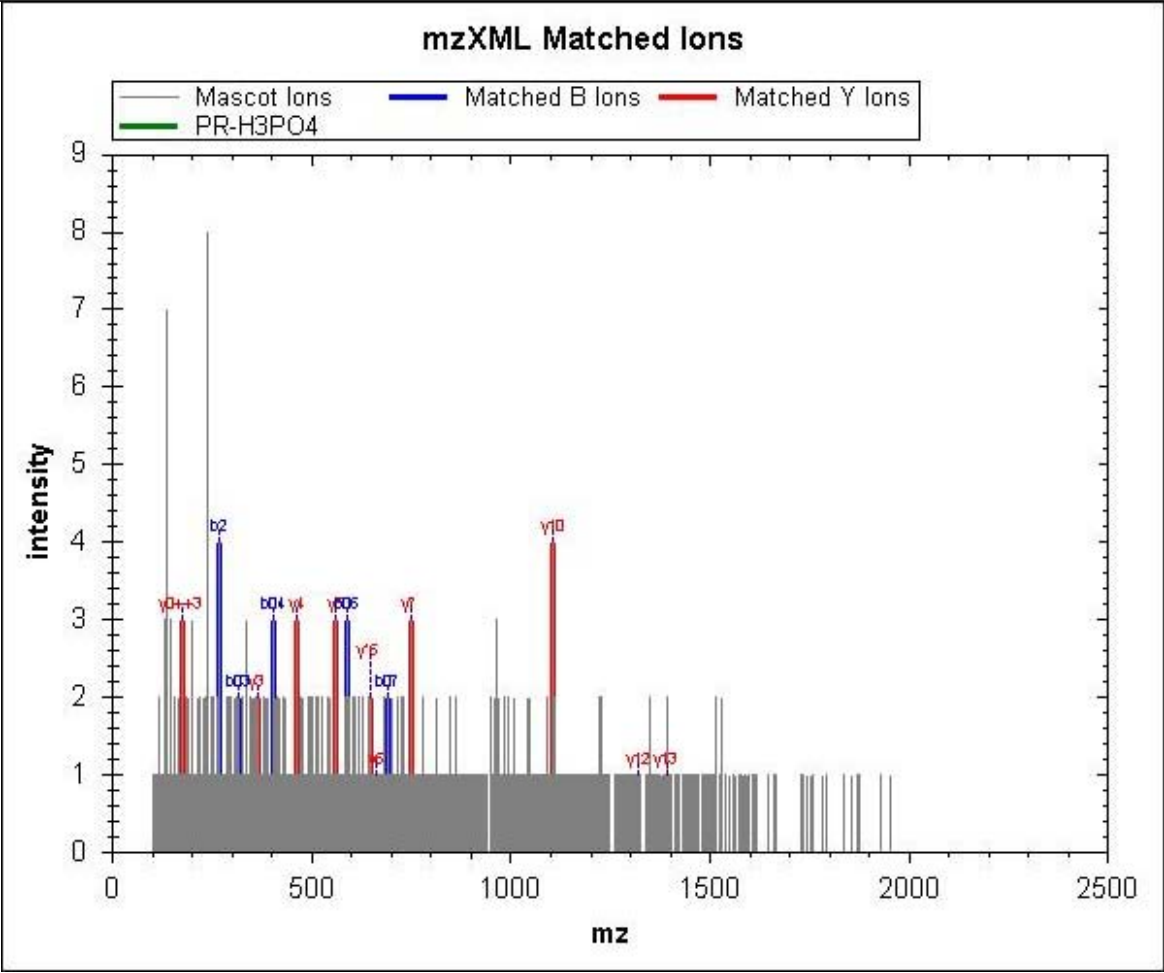

Protein index=1434, ACC No: IPI00220301

Peptide index=5315 MS/MS spectrum

Sequence: LIALSIDSVEDHLAWSK, m/z:633.0059, charge:+ 3, Modification: , Mod Position:

Score: 46.04, Raw data:WET\_B5\_090616\_03.mzxml, MS/MS Elution time: 71.864, Scan number:3970, Mass delta:-0.0032, Rank:1

| No | b      | b++    | b0     | b0++   | Seq | y       | y++    | y*      | y*++   | y0      | y0++   | RevNo |
|----|--------|--------|--------|--------|-----|---------|--------|---------|--------|---------|--------|-------|
| 1  | 114.09 | 57.55  |        |        | L   |         |        |         |        |         |        | 17    |
| 2  | 227.18 | 114.09 |        |        | I   | 1783.92 | 892.46 | 1766.9  | 883.95 | 1765.91 | 883.46 | 16    |
| 3  | 298.21 | 149.61 |        |        | A   | 1670.84 | 835.92 | 1653.81 | 827.41 | 1652.83 | 826.92 | 15    |
| 4  | 411.3  | 206.15 |        |        | L   | 1599.8  | 800.4  | 1582.77 | 791.89 | 1581.79 | 791.4  | 14    |
| 5  | 498.33 | 249.67 | 480.32 | 240.66 | S   | 1486.72 | 743.86 | 1469.69 | 735.35 | 1468.71 | 734.86 | 13    |
| 6  | 611.41 | 306.21 | 593.4  | 297.2  | I   | 1399.69 | 700.35 | 1382.66 | 691.83 | 1381.67 | 691.34 | 12    |

|    |         |        |         |        |   |         |        |         |        |         |        |    |
|----|---------|--------|---------|--------|---|---------|--------|---------|--------|---------|--------|----|
| 7  | 726.44  | 363.72 | 708.43  | 354.72 | D | 1286.6  | 643.8  | 1269.57 | 635.29 | 1268.59 | 634.8  | 11 |
| 8  | 813.47  | 407.24 | 795.46  | 398.23 | S | 1171.57 | 586.29 | 1154.55 | 577.78 | 1153.56 | 577.29 | 10 |
| 9  | 912.54  | 456.77 | 894.53  | 447.77 | V | 1084.54 | 542.77 | 1067.52 | 534.26 | 1066.53 | 533.77 | 9  |
| 10 | 1041.58 | 521.29 | 1023.57 | 512.29 | E | 985.47  | 493.24 | 968.45  | 484.73 | 967.46  | 484.24 | 8  |
| 11 | 1156.61 | 578.81 | 1138.6  | 569.8  | D | 856.43  | 428.72 | 839.4   | 420.21 | 838.42  | 419.71 | 7  |
| 12 | 1293.67 | 647.34 | 1275.66 | 638.33 | H | 741.4   | 371.21 | 724.38  | 362.69 | 723.39  | 362.2  | 6  |
| 13 | 1406.75 | 703.88 | 1388.74 | 694.87 | L | 604.35  | 302.68 | 587.32  | 294.16 | 586.33  | 293.67 | 5  |
| 14 | 1477.79 | 739.4  | 1459.78 | 730.39 | A | 491.26  | 246.13 | 474.23  | 237.62 | 473.25  | 237.13 | 4  |
| 15 | 1663.87 | 832.44 | 1645.86 | 823.43 | W | 420.22  | 210.62 | 403.2   | 202.1  | 402.21  | 201.61 | 3  |
| 16 | 1750.9  | 875.95 | 1732.89 | 866.95 | S | 234.14  | 117.58 | 217.12  | 109.06 | 216.13  | 108.57 | 2  |
| 17 |         |        |         |        | K | 147.11  | 74.06  | 130.09  | 65.55  |         |        | 1  |

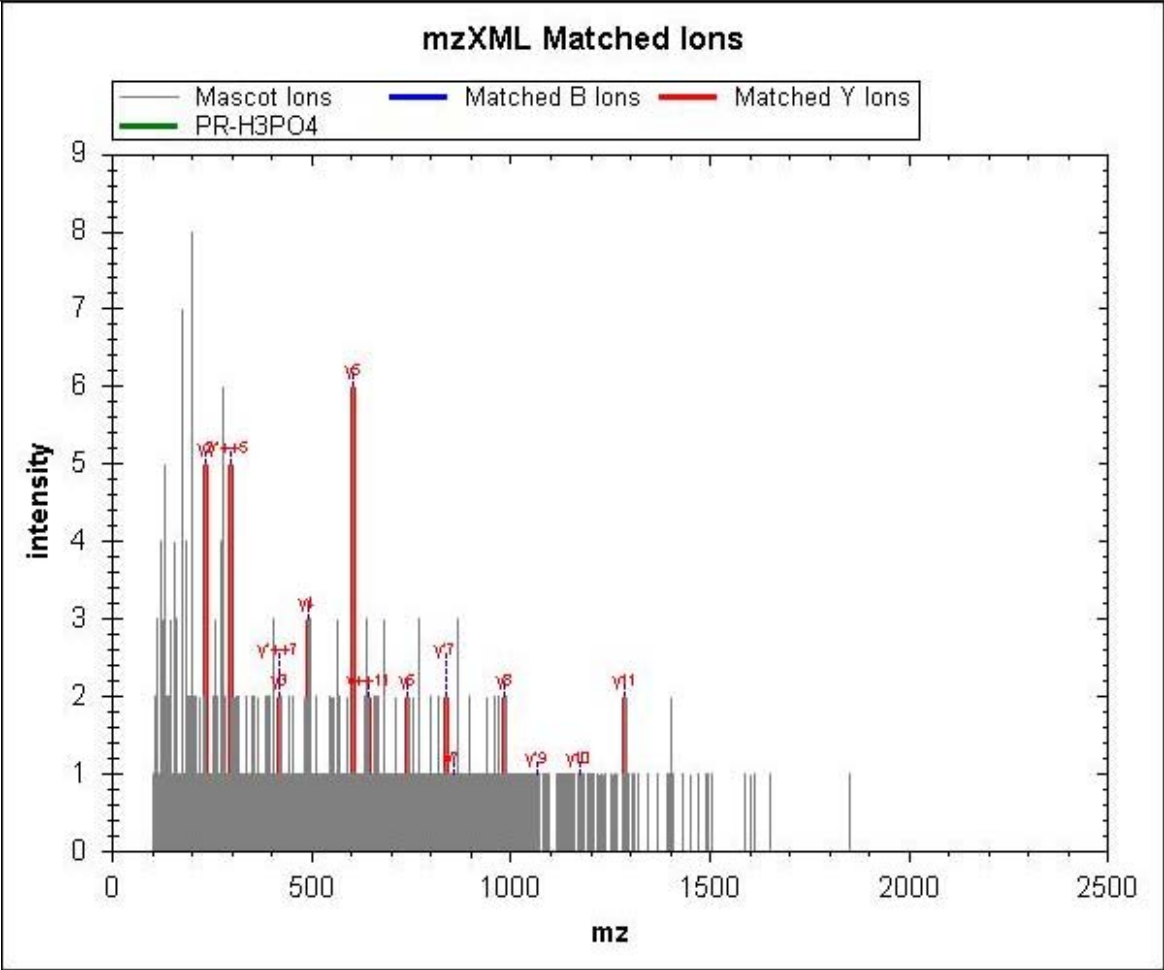

Protein index=1435, ACC No: IPI00218493

Peptide index=6409 MS/MS spectrum

Sequence: FFADLLDYIK, m/z:622.8356, charge:+ 2, Modification: , Mod Position:

Score: 41.06, Raw data:WET\_B5\_090616\_03.mzxml, MS/MS Elution time: 87.66067, Scan number:4895, Mass delta:0.0077, Rank:1

| No | b      | b++   | b0 | b0++ | Seq | y | y++ | y* | y*++ | y0 | y0++ | RevNo |
|----|--------|-------|----|------|-----|---|-----|----|------|----|------|-------|
| 1  | 148.08 | 74.54 |    |      | F   |   |     |    |      |    |      | 10    |



|    |         |         |         |         |         |         |   |         |         |         |         |         |         |    |
|----|---------|---------|---------|---------|---------|---------|---|---------|---------|---------|---------|---------|---------|----|
| 4  | 519.26  | 260.13  | 502.23  | 251.62  |         |         | L | 2036.13 | 1018.57 | 2019.1  | 1010.05 | 2018.11 | 1009.56 | 18 |
| 5  | 632.34  | 316.67  | 615.31  | 308.16  |         |         | L | 1923.04 | 962.02  | 1906.01 | 953.51  | 1905.03 | 953.02  | 17 |
| 6  | 729.39  | 365.2   | 712.37  | 356.69  |         |         | P | 1809.96 | 905.48  | 1792.93 | 896.97  | 1791.95 | 896.48  | 16 |
| 7  | 842.48  | 421.74  | 825.45  | 413.23  |         |         | L | 1712.9  | 856.96  | 1695.88 | 848.44  | 1694.89 | 847.95  | 15 |
| 8  | 989.55  | 495.28  | 972.52  | 486.76  |         |         | F | 1599.82 | 800.41  | 1582.79 | 791.9   | 1581.81 | 791.41  | 14 |
| 9  | 1088.61 | 544.81  | 1071.59 | 536.3   |         |         | V | 1452.75 | 726.88  | 1435.73 | 718.37  | 1434.74 | 717.87  | 13 |
| 10 | 1145.64 | 573.32  | 1128.61 | 564.81  |         |         | G | 1353.68 | 677.35  | 1336.66 | 668.83  | 1335.67 | 668.34  | 12 |
| 11 | 1282.69 | 641.85  | 1265.67 | 633.34  |         |         | H | 1296.66 | 648.83  | 1279.64 | 640.32  | 1278.65 | 639.83  | 11 |
| 12 | 1396.74 | 698.87  | 1379.71 | 690.36  |         |         | N | 1159.6  | 580.31  | 1142.58 | 571.79  | 1141.59 | 571.3   | 10 |
| 13 | 1527.78 | 764.39  | 1510.75 | 755.88  |         |         | M | 1045.56 | 523.28  | 1028.53 | 514.77  | 1027.55 | 514.28  | 9  |
| 14 | 1640.86 | 820.93  | 1623.84 | 812.42  |         |         | L | 914.52  | 457.76  | 897.49  | 449.25  | 896.51  | 448.76  | 8  |
| 15 | 1753.95 | 877.48  | 1736.92 | 868.96  |         |         | L | 801.44  | 401.22  | 784.41  | 392.71  | 783.42  | 392.22  | 7  |
| 16 | 1853.01 | 927.01  | 1835.99 | 918.5   |         |         | V | 688.35  | 344.68  | 671.32  | 336.17  | 670.34  | 335.67  | 6  |
| 17 | 1940.05 | 970.53  | 1923.02 | 962.01  | 1922.04 | 961.52  | S | 589.28  | 295.15  | 572.26  | 286.63  | 571.27  | 286.14  | 5  |
| 18 | 2069.09 | 1035.05 | 2052.06 | 1026.53 | 2051.08 | 1026.04 | E | 502.25  | 251.63  | 485.22  | 243.12  | 484.24  | 242.62  | 4  |
| 19 | 2198.13 | 1099.57 | 2181.1  | 1091.06 | 2180.12 | 1090.56 | E | 373.21  | 187.11  | 356.18  | 178.59  | 355.2   | 178.1   | 3  |
| 20 | 2295.18 | 1148.1  | 2278.16 | 1139.58 | 2277.17 | 1139.09 | P | 244.17  | 122.59  | 227.14  | 114.07  |         |         | 2  |
| 21 |         |         |         |         |         |         | K | 147.11  | 74.06   | 130.09  | 65.55   |         |         | 1  |

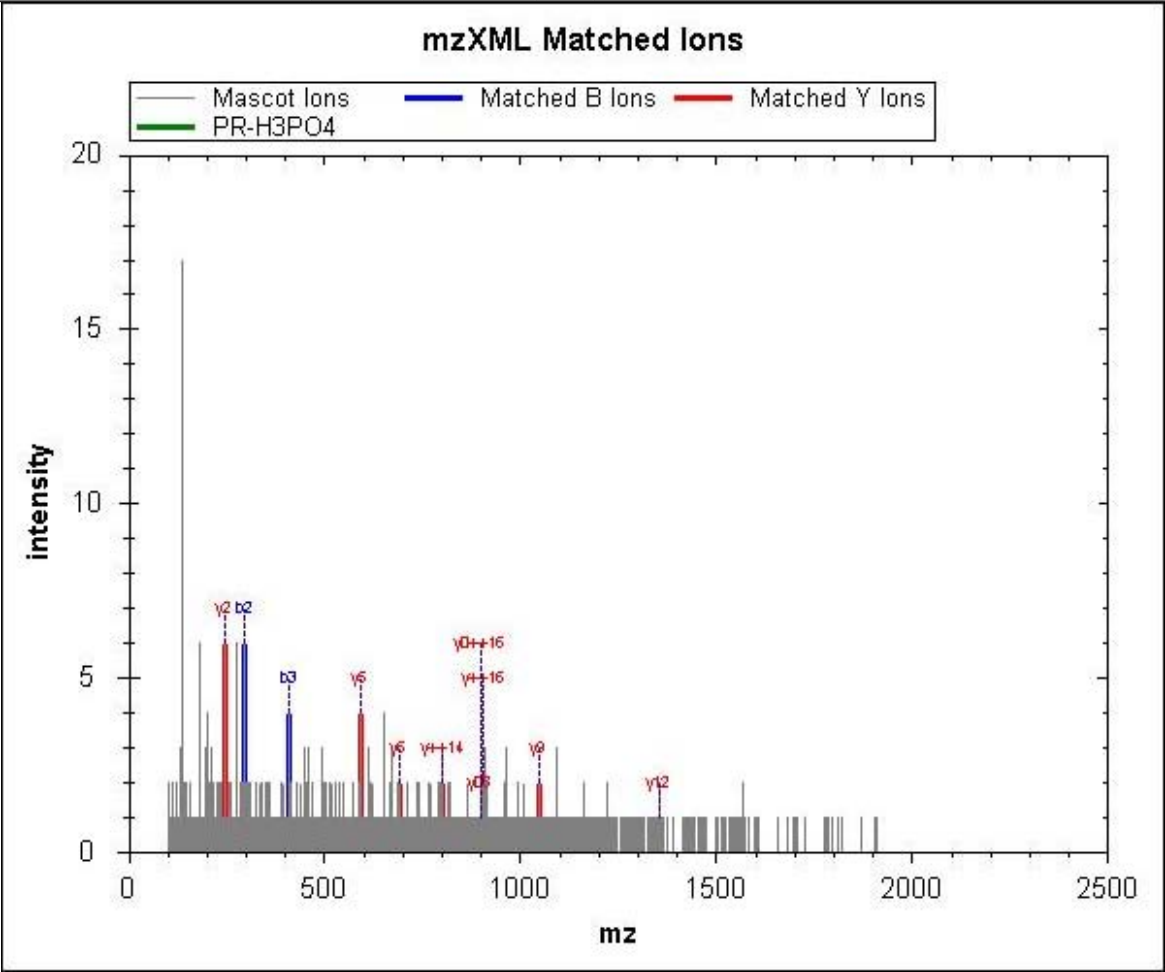

Protein index=1437, ACC No: IPI00019326

Peptide index=237 MS/MS spectrum

Sequence: VPETVADAR, m/z:479.2539, charge:+ 2, Modification: , Mod Position:

Score: 55.13, Raw data:WET\_B5\_090616\_03.mzxml, MS/MS Elution time: 17.21983, Scan number:766, Mass delta:0.0004, Rank:1

| No | b      | b++    | b0     | b0++   | Seq | y      | y++    | y*     | y*++   | y0     | y0++   | RevNo |
|----|--------|--------|--------|--------|-----|--------|--------|--------|--------|--------|--------|-------|
| 1  | 100.08 | 50.54  |        |        | V   |        |        |        |        |        |        | 9     |
| 2  | 197.13 | 99.07  |        |        | P   | 858.43 | 429.72 | 841.4  | 421.21 | 840.42 | 420.71 | 8     |
| 3  | 326.17 | 163.59 | 308.16 | 154.58 | E   | 761.38 | 381.19 | 744.35 | 372.68 | 743.37 | 372.19 | 7     |
| 4  | 427.22 | 214.11 | 409.21 | 205.11 | T   | 632.34 | 316.67 | 615.31 | 308.16 | 614.33 | 307.67 | 6     |
| 5  | 526.29 | 263.65 | 508.28 | 254.64 | V   | 531.29 | 266.15 | 514.26 | 257.63 | 513.28 | 257.14 | 5     |
| 6  | 597.32 | 299.17 | 579.31 | 290.16 | A   | 432.22 | 216.61 | 415.19 | 208.1  | 414.21 | 207.61 | 4     |
| 7  | 712.35 | 356.68 | 694.34 | 347.67 | D   | 361.18 | 181.1  | 344.16 | 172.58 | 343.17 | 172.09 | 3     |
| 8  | 783.39 | 392.2  | 765.38 | 383.19 | A   | 246.16 | 123.58 | 229.13 | 115.07 |        |        | 2     |
| 9  |        |        |        |        | R   | 175.12 | 88.06  | 158.09 | 79.55  |        |        | 1     |

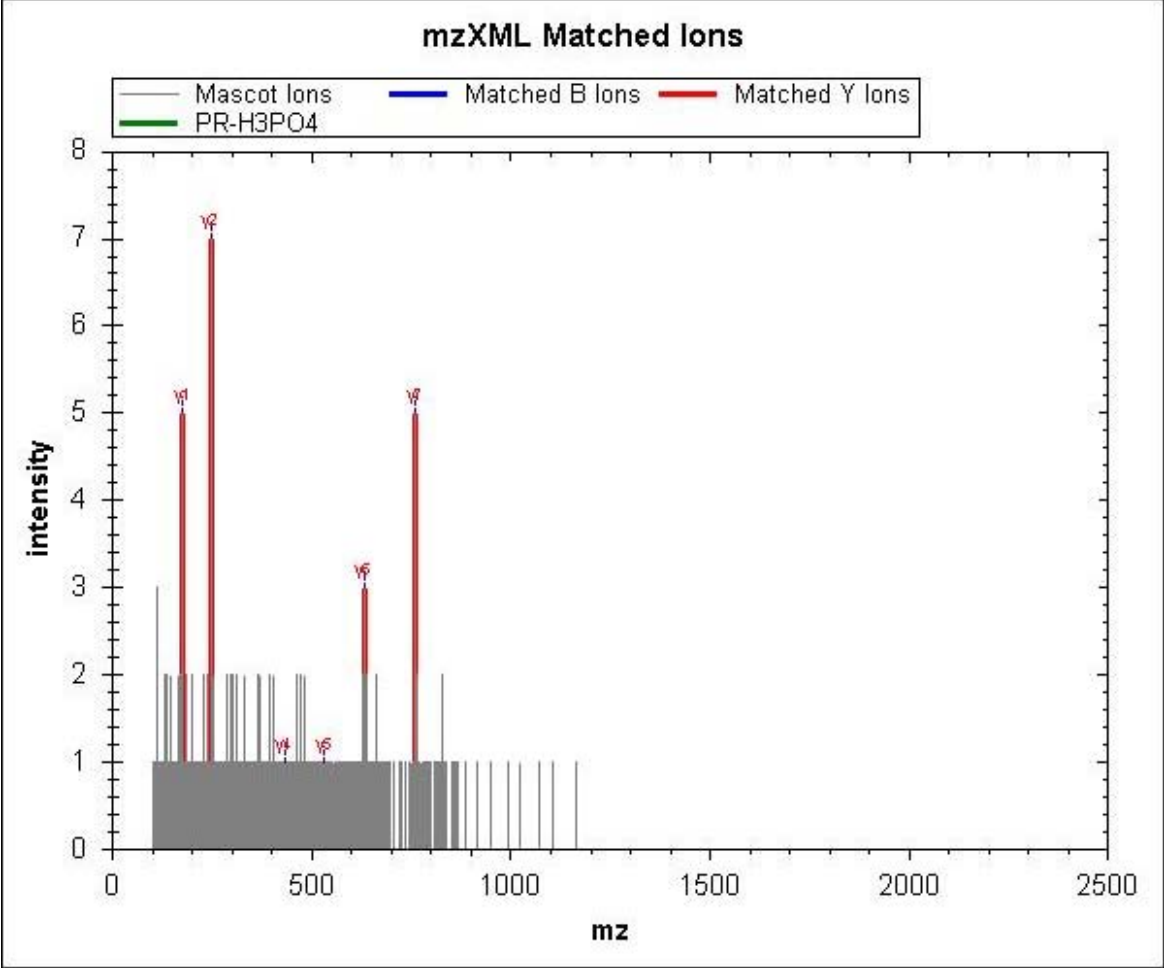

Protein index=1438, ACC No:IP100024989

Peptide index=681 MS/MS spectrum

Sequence: SGGASHSELIHNLR, m/z:493.2559, charge:+ 3, Modification: , Mod Position:

Score: 44.86, Raw data:WET\_B5\_090616\_03.mzxml, MS/MS Elution time: 22.371, Scan number:1065,

Mass delta:0.0026, Rank:1

| No | b       | b++    | b*      | b*++   | b0      | b0++   | Seq | y       | y++    | y*      | y*++   | y0      | y0++   | RevNo |
|----|---------|--------|---------|--------|---------|--------|-----|---------|--------|---------|--------|---------|--------|-------|
| 1  | 88.04   | 44.52  |         |        | 70.03   | 35.52  | S   |         |        |         |        |         |        | 14    |
| 2  | 145.06  | 73.03  |         |        | 127.05  | 64.03  | G   | 1390.72 | 695.86 | 1373.69 | 687.35 | 1372.71 | 686.86 | 13    |
| 3  | 202.08  | 101.54 |         |        | 184.07  | 92.54  | G   | 1333.7  | 667.35 | 1316.67 | 658.84 | 1315.69 | 658.35 | 12    |
| 4  | 273.12  | 137.06 |         |        | 255.11  | 128.06 | A   | 1276.68 | 638.84 | 1259.65 | 630.33 | 1258.67 | 629.84 | 11    |
| 5  | 360.15  | 180.58 |         |        | 342.14  | 171.57 | S   | 1205.64 | 603.32 | 1188.61 | 594.81 | 1187.63 | 594.32 | 10    |
| 6  | 497.21  | 249.11 |         |        | 479.2   | 240.1  | H   | 1118.61 | 559.81 | 1101.58 | 551.29 | 1100.6  | 550.8  | 9     |
| 7  | 584.24  | 292.62 |         |        | 566.23  | 283.62 | S   | 981.55  | 491.28 | 964.52  | 482.76 | 963.54  | 482.27 | 8     |
| 8  | 713.28  | 357.15 |         |        | 695.27  | 348.14 | E   | 894.52  | 447.76 | 877.49  | 439.25 | 876.51  | 438.76 | 7     |
| 9  | 826.37  | 413.69 |         |        | 808.36  | 404.68 | L   | 765.47  | 383.24 | 748.45  | 374.73 |         |        | 6     |
| 10 | 939.45  | 470.23 |         |        | 921.44  | 461.22 | I   | 652.39  | 326.7  | 635.36  | 318.18 |         |        | 5     |
| 11 | 1076.51 | 538.76 |         |        | 1058.5  | 529.75 | H   | 539.3   | 270.16 | 522.28  | 261.64 |         |        | 4     |
| 12 | 1190.55 | 595.78 | 1173.53 | 587.27 | 1172.54 | 586.78 | N   | 402.25  | 201.63 | 385.22  | 193.11 |         |        | 3     |
| 13 | 1303.64 | 652.32 | 1286.61 | 643.81 | 1285.63 | 643.32 | L   | 288.2   | 144.61 | 271.18  | 136.09 |         |        | 2     |
| 14 |         |        |         |        |         |        | R   | 175.12  | 88.06  | 158.09  | 79.55  |         |        | 1     |

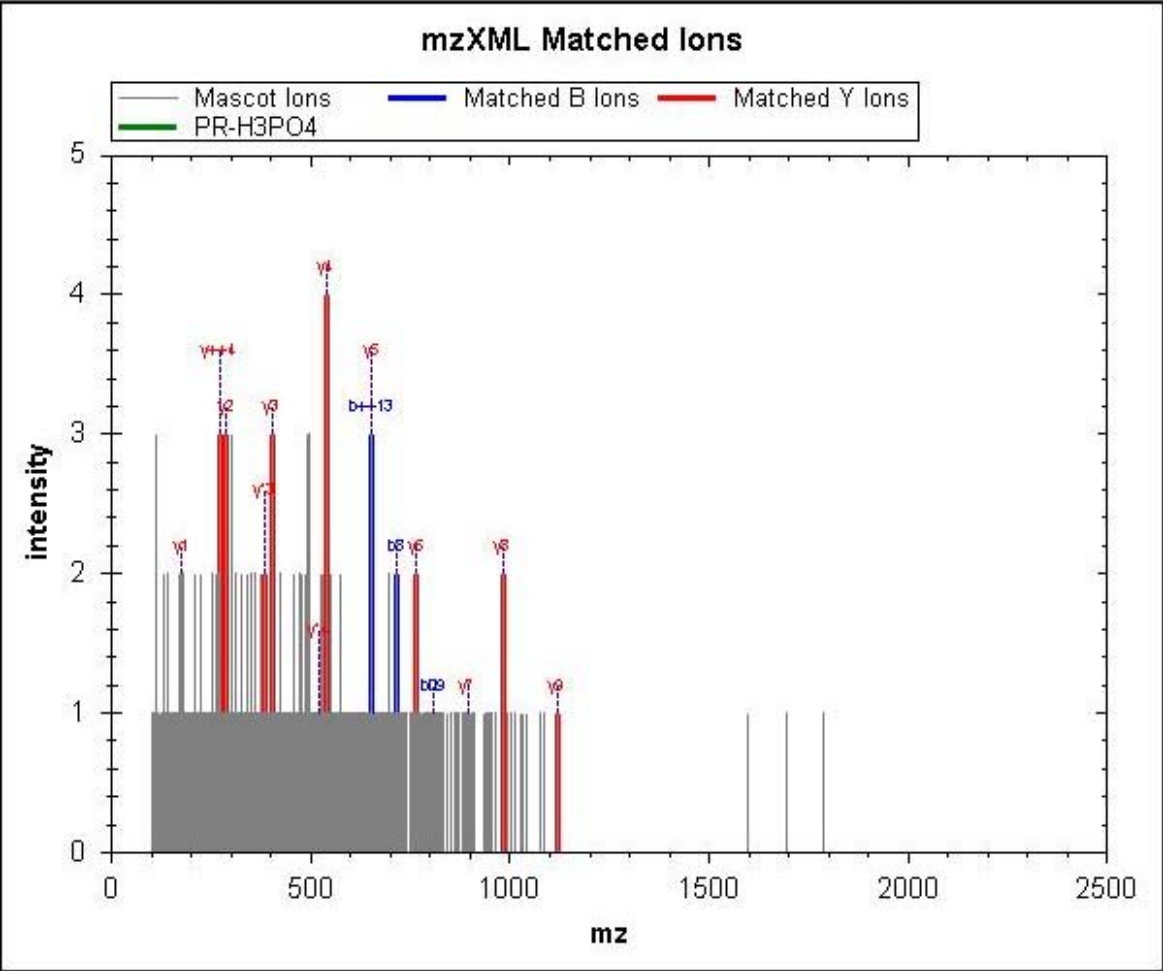

Supplement: M900177-MCP200_1.pdf [file M900177-MCP200_1.pdf]
